# Supplementary material for: Characteristics that modify the effect of small-quantity lipid-based nutrient supplementation on child growth: an individual participant data meta-analysis of randomized controlled trials
Source: bioRxiv or medRxiv preprint supplement (doi:10.1101/2021.02.05.21251105), 2021-02-08

Supplemental Figure 1: Summary risk of bias as a percentage of all included studies for the effects of SQ-LNS on growth outcomes

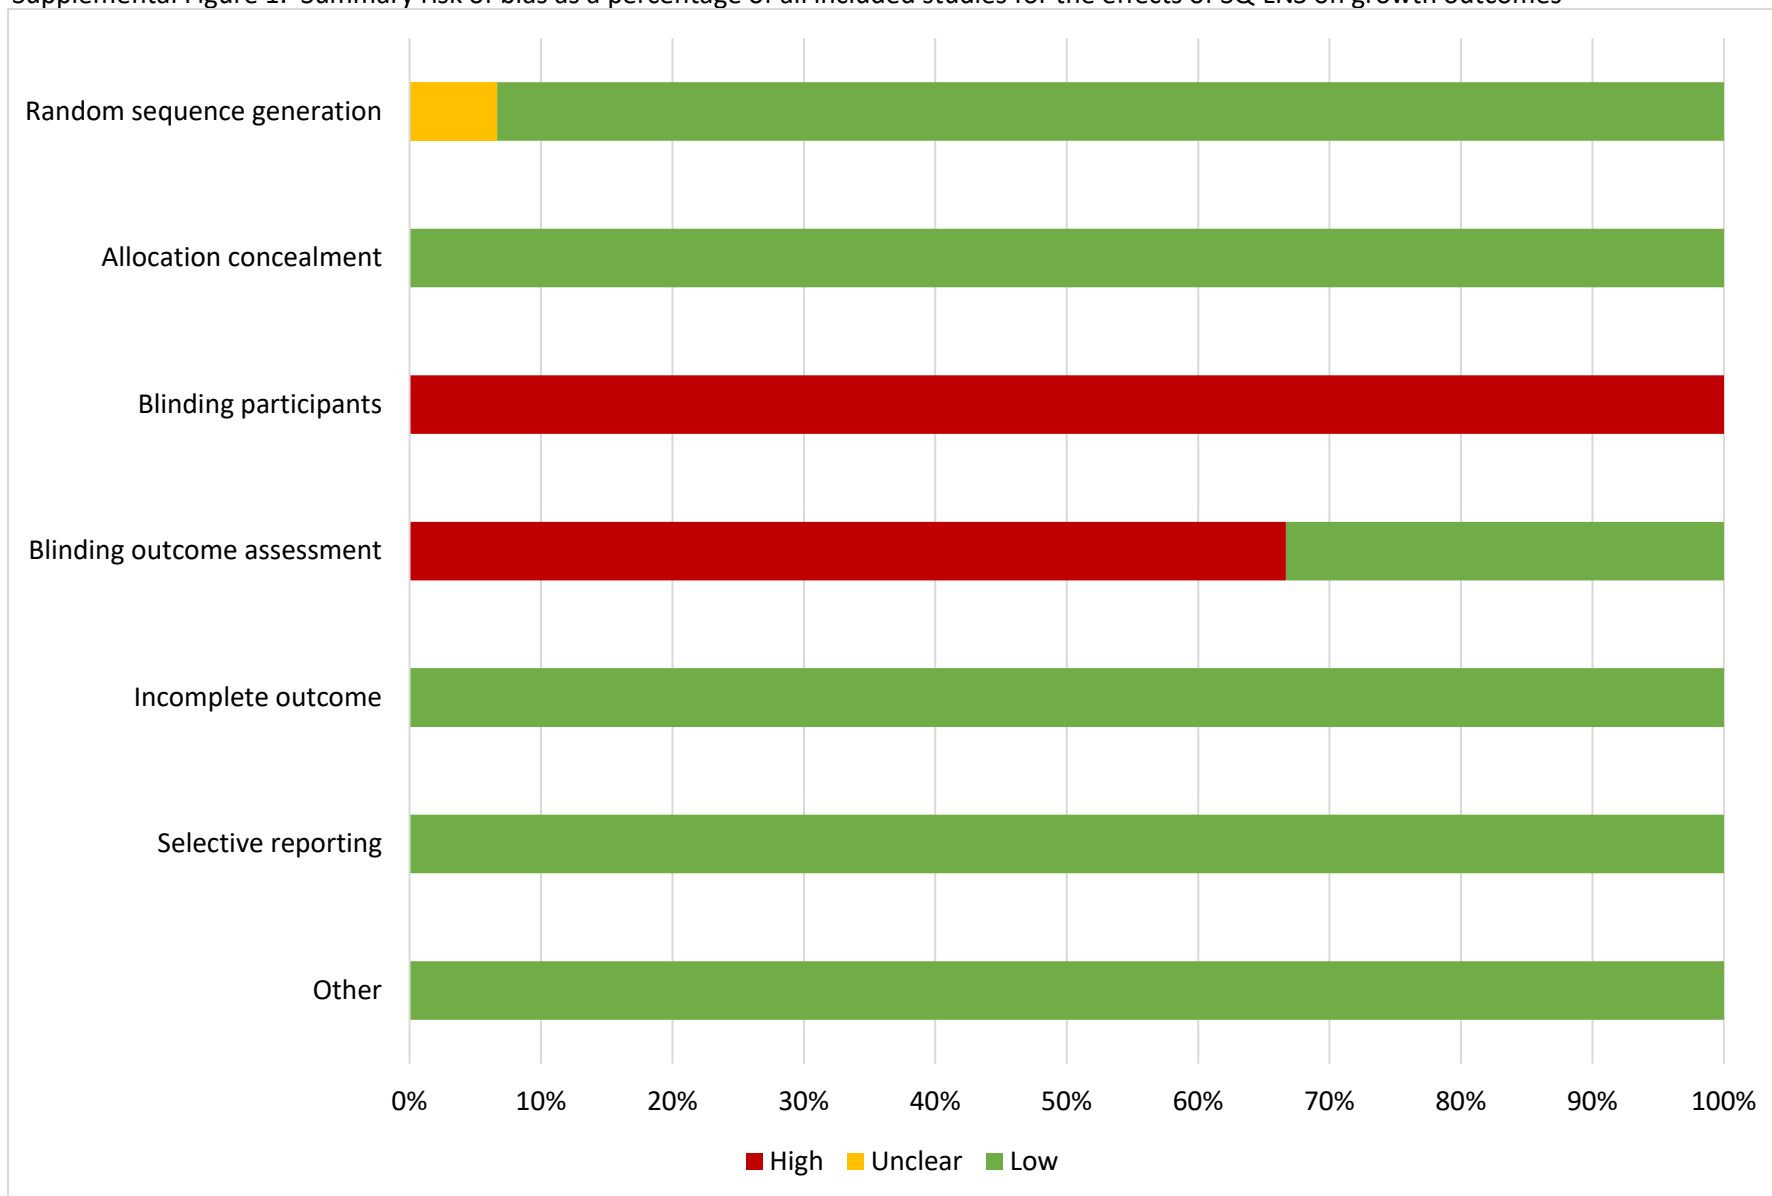

## Supplemental figure 2: Sensitivity analyses of main effects of SQ-LNS on growth outcomes

### Contents

|                                                                         |   |
|-------------------------------------------------------------------------|---|
| Supplemental figure 2A: Mean differences for continuous outcomes        | 2 |
| Supplemental figure 2B: Prevalence ratios for dichotomous outcomes      | 3 |
| Supplemental figure 2C: Prevalence differences for dichotomous outcomes | 4 |

These figures show the pooled estimates of intervention effects by different pooling methods and different sensitivity analyses. For continuous outcomes, the intervention effect is measured by the difference in mean of the LNS group minus control. For dichotomous outcomes analyzed via prevalence ratios, the effect estimate is the prevalence in the LNS group divided by the prevalence in the control group. For dichotomous outcomes analyzed via prevalence differences, the effect estimate is the prevalence in the LNS group minus the prevalence in the control group. The labels on the left y-axis indicate which outcome is assessed. The different columns correspond to sensitivity analyses in which intervention group categorization differs. All-trial analysis includes all trials; Child-LNS-only excludes trial arms that provided both maternal and child LNS; Multi-component analysis separates comparisons within trials that included multi-component interventions, so that the SQ-LNS vs. no SQ-LNS comparisons were conducted separately between pairs of arms that included the same non-nutrition components (e.g. SQ-LNS+WASH vs. WASH; SQ-LNS vs. Control); Passive arms excluded analysis excludes passive control arms; Milk-peanut LNS only analysis excludes arms with SQ-LNS formulations that were not milk and peanut based. LAZ, length-for-age z-score; WLZ, weight-for-length z-score; WAZ, weight-for-age z-score; MUACZ, midupper arm circumference z-score; HCZ, head circumference-for-age z-score.

Supplemental figure 2A: Mean differences for continuous outcomes

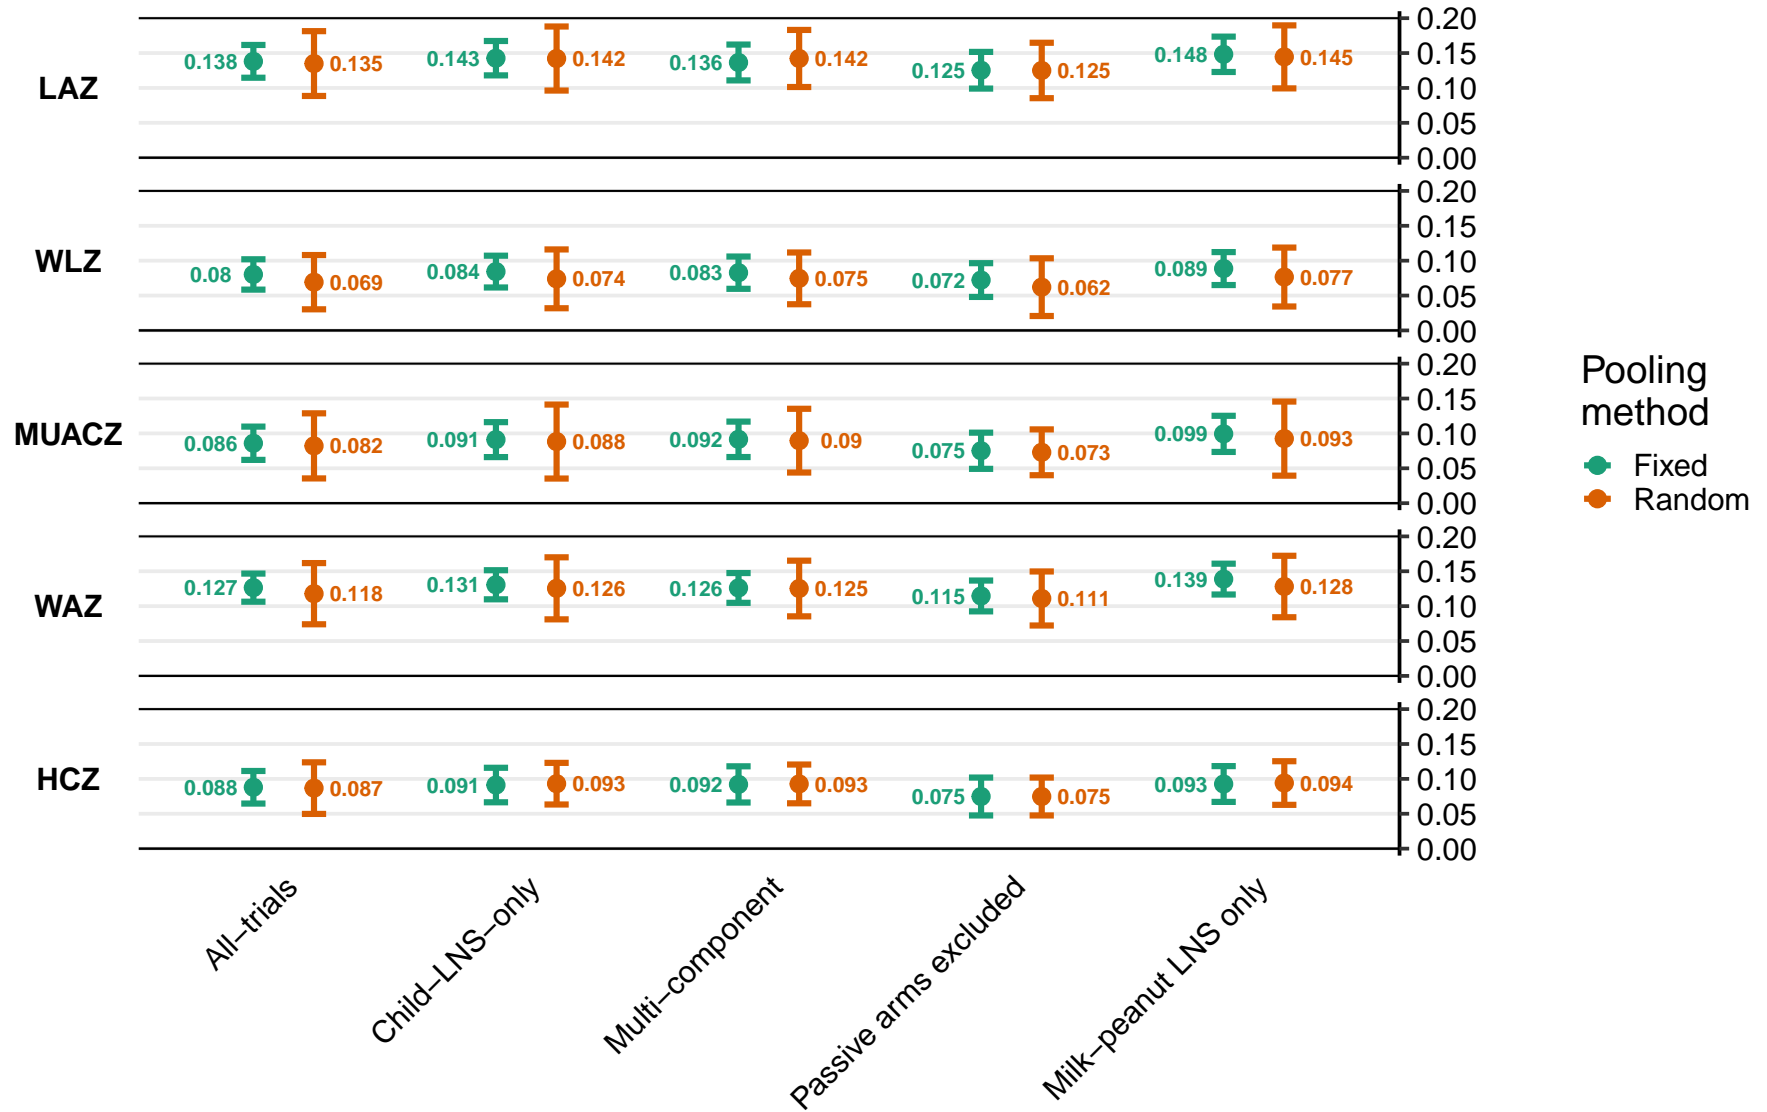

Supplemental figure 2B: Prevalence ratios for dichotomous outcomes

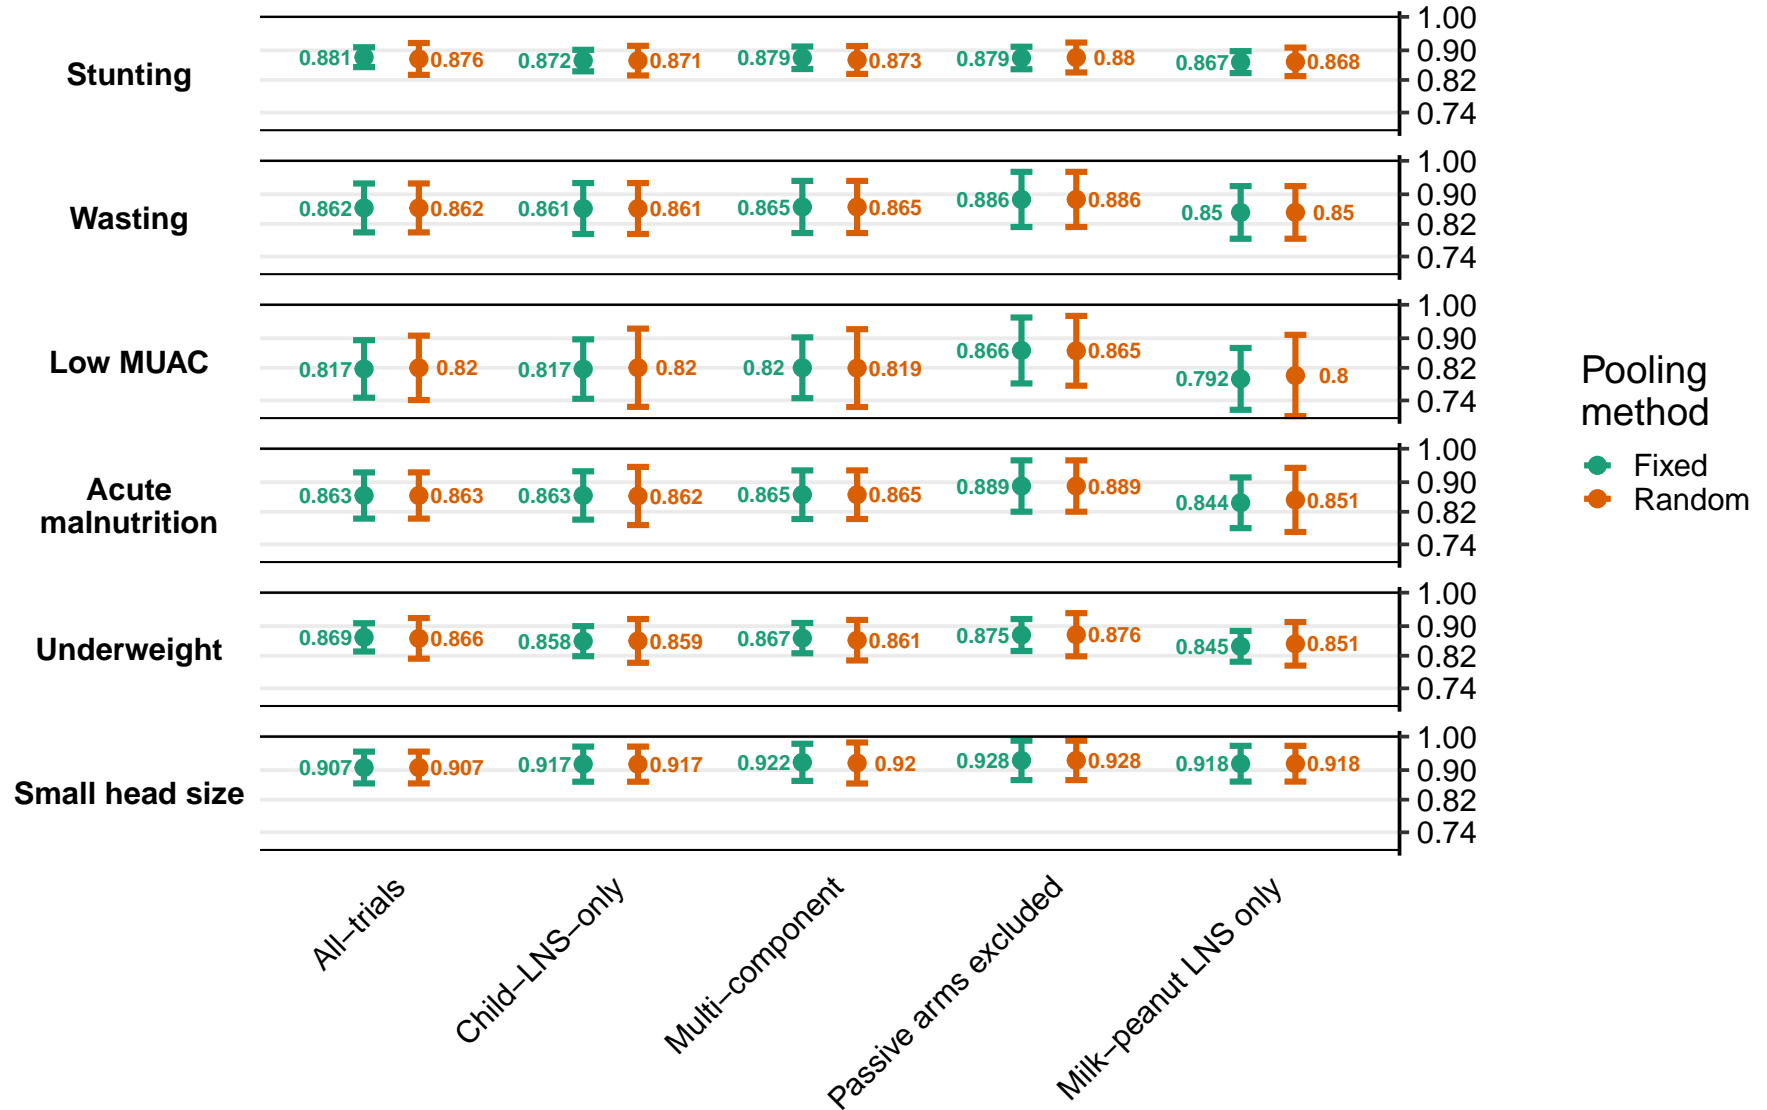

Supplemental figure 2C: Prevalence differences for dichotomous outcomes

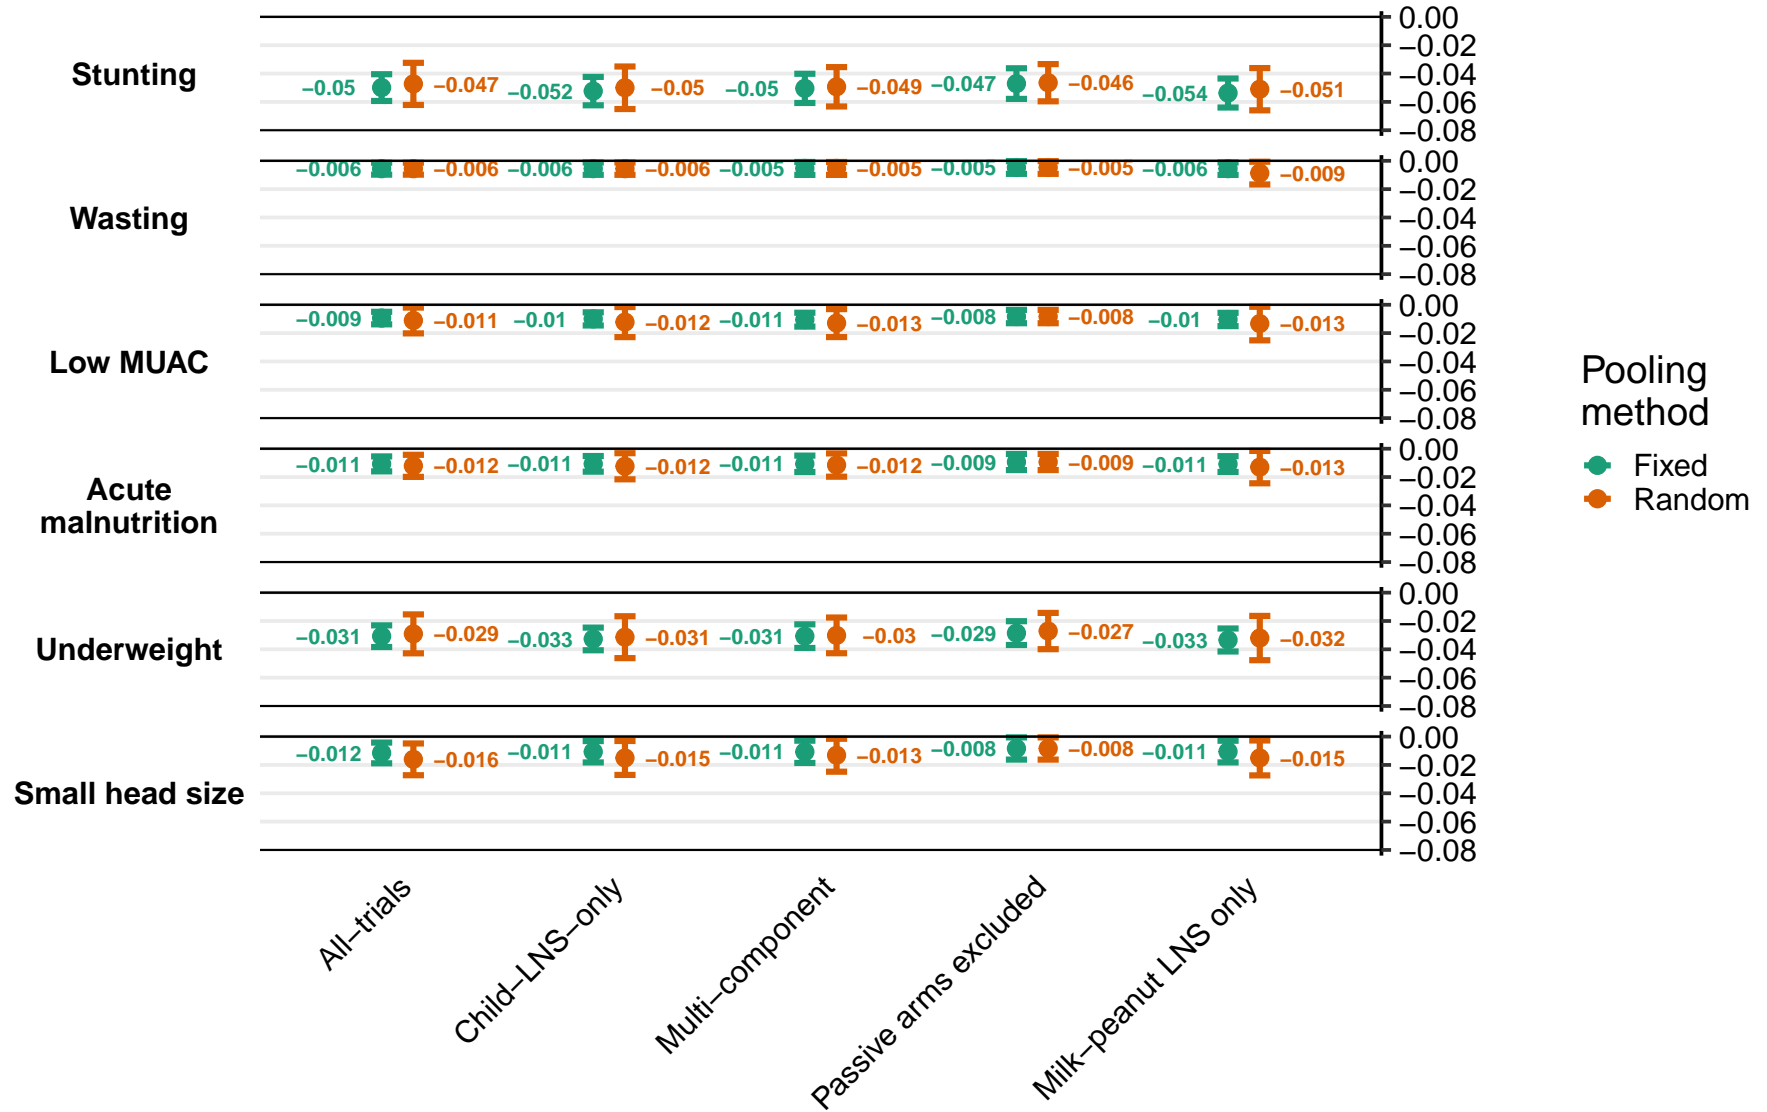

## Supplemental figure 3: Forest plots for all main effects of SQ-LNS on growth outcomes

### Contents

|                                                                  |    |
|------------------------------------------------------------------|----|
| Supplemental figure 3A: Mean difference in LAZ                   | 2  |
| Supplemental figure 3B: Stunting prevalence ratio                | 3  |
| Supplemental figure 3C: Stunting prevalence difference           | 4  |
| Supplemental figure 3D: Mean difference in WLZ                   | 5  |
| Supplemental figure 3E: Wasting prevalence ratio                 | 6  |
| Supplemental figure 3F: Wasting prevalence difference            | 7  |
| Supplemental figure 3G: Mean difference in MUACZ                 | 8  |
| Supplemental figure 3H: Low MUAC prevalence ratio                | 9  |
| Supplemental figure 3I: Low MUAC prevalence difference           | 10 |
| Supplemental figure 3J: Acute malnutrition prevalence ratio      | 11 |
| Supplemental figure 3K: Acute malnutrition prevalence difference | 12 |
| Supplemental figure 3L: Mean difference in WAZ                   | 13 |
| Supplemental figure 3M: Underweight prevalence ratio             | 14 |
| Supplemental figure 3N: Underweight prevalence difference        | 15 |
| Supplemental figure 3O: Mean difference in HCZ                   | 16 |
| Supplemental figure 3P: Small head size prevalence ratio         | 17 |
| Supplemental figure 3Q: Small head size prevalence difference    | 18 |

These figures are forest plots showing the study-level estimates of intervention effect with the pooled estimate in the bottom summary rows. For continuous outcomes the intervention effect is measured by the difference in mean of the LNS group minus control. For dichotomous outcomes analyzed via prevalence ratios the effect estimate is the prevalence in the LNS group divided by the prevalence in the control group. For dichotomous outcomes analyzed via prevalence differences the effect estimate is the prevalence in the LNS group minus the prevalence in the control group. The labels on the left y-axis correspond to trial level information. The values on the right indicate the study level effect estimate, confidence interval, and weighting for deriving the pooled estimate. LAZ, length-for-age z-score; WLZ, weight-for-length z-score; WAZ, weight-for-age z-score; MUACZ, mid-upper arm circumference z-score; HCZ, head circumference-for-age z-score.

### Supplemental figure 3A: Mean difference in LAZ

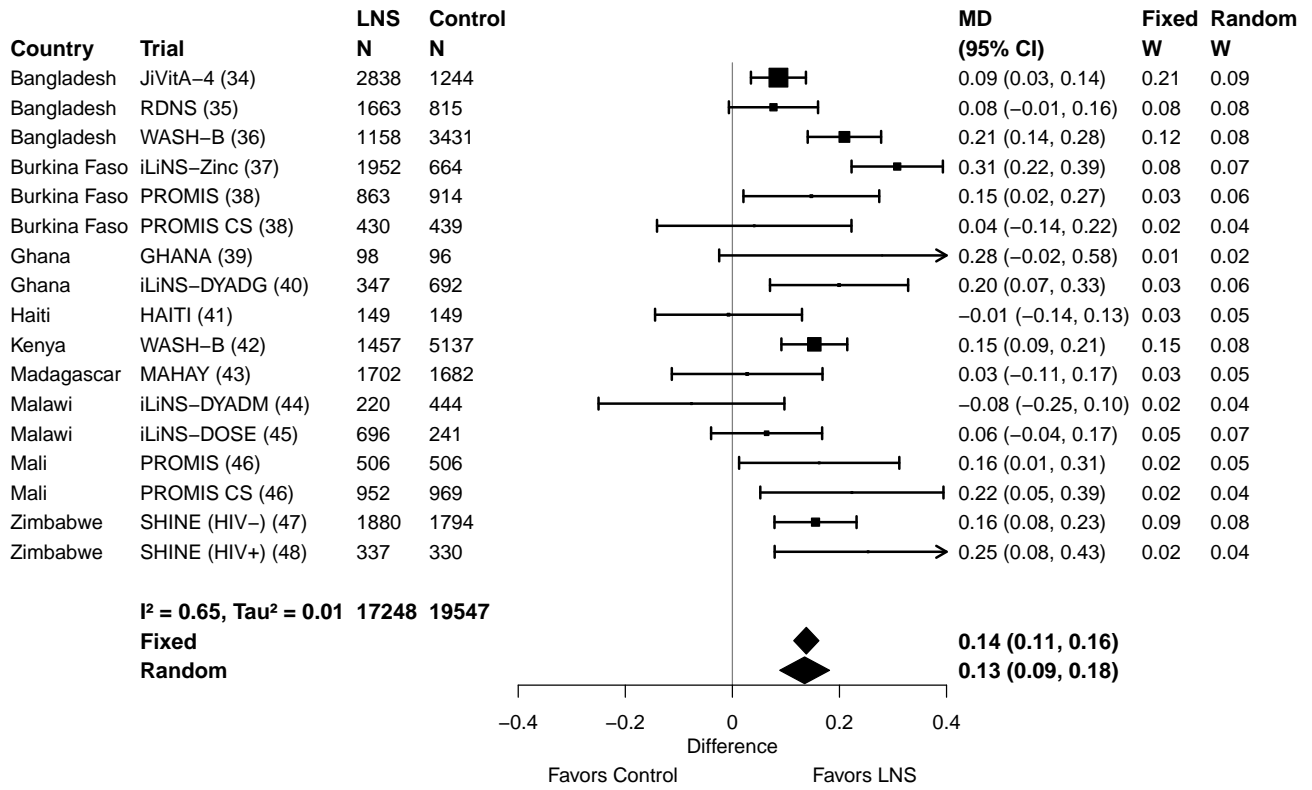

### Supplemental figure 3B: Stunting prevalence ratio

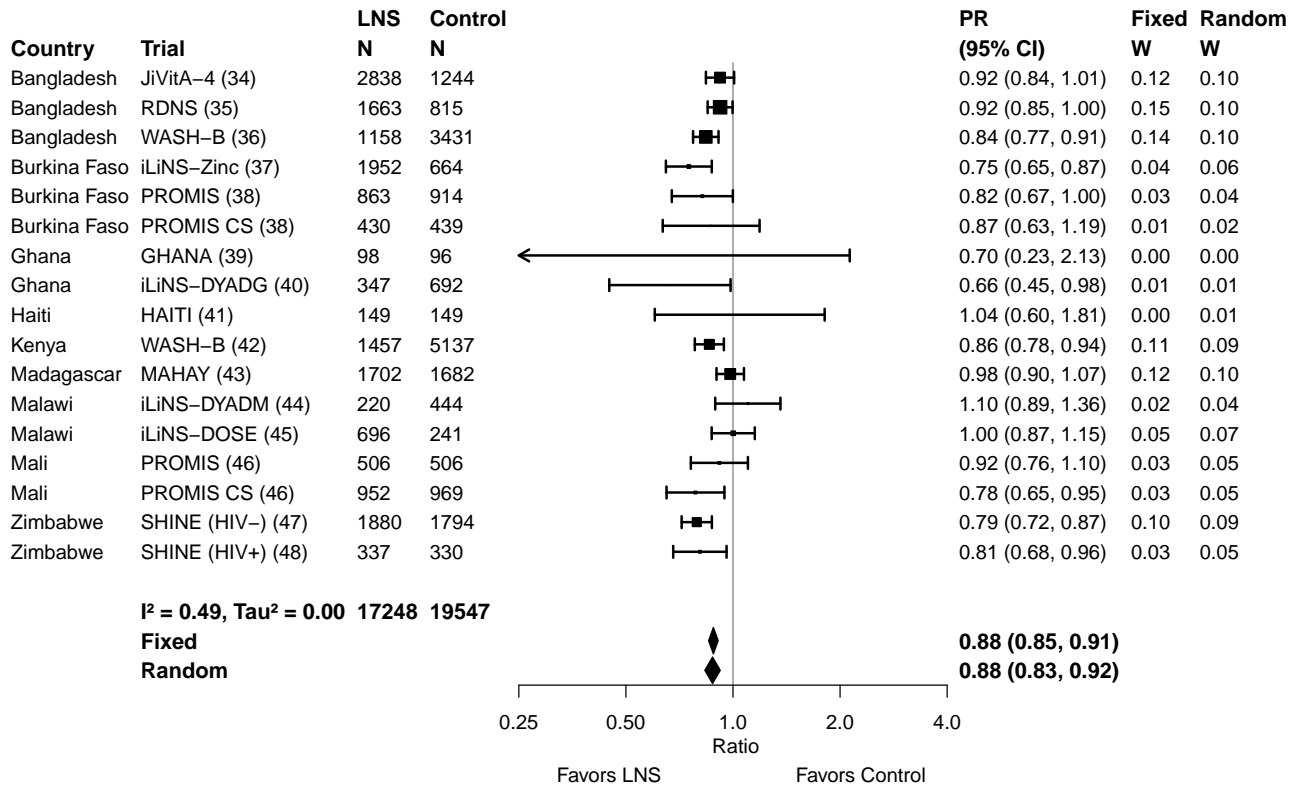



### Supplemental figure 3C: Stunting prevalence difference

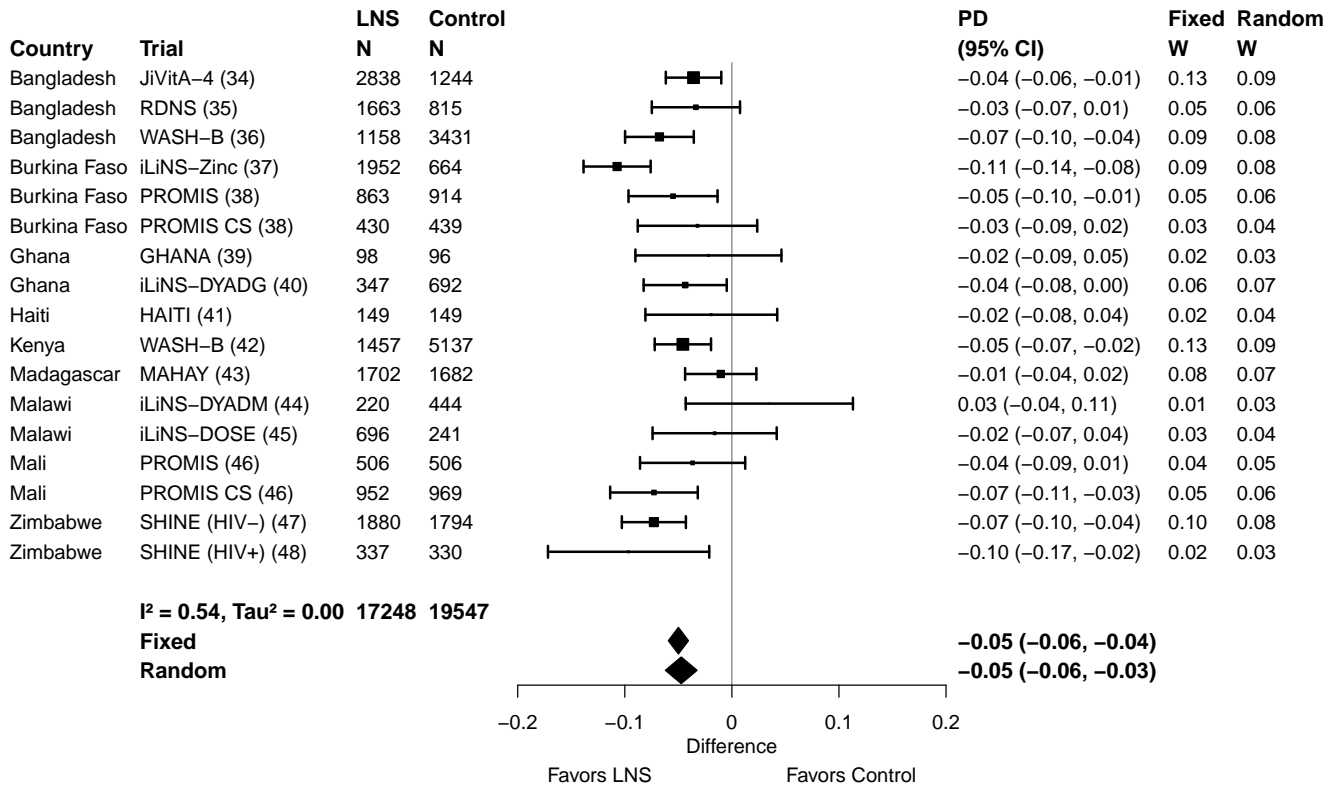

### Supplemental figure 3D: Mean difference in WLZ

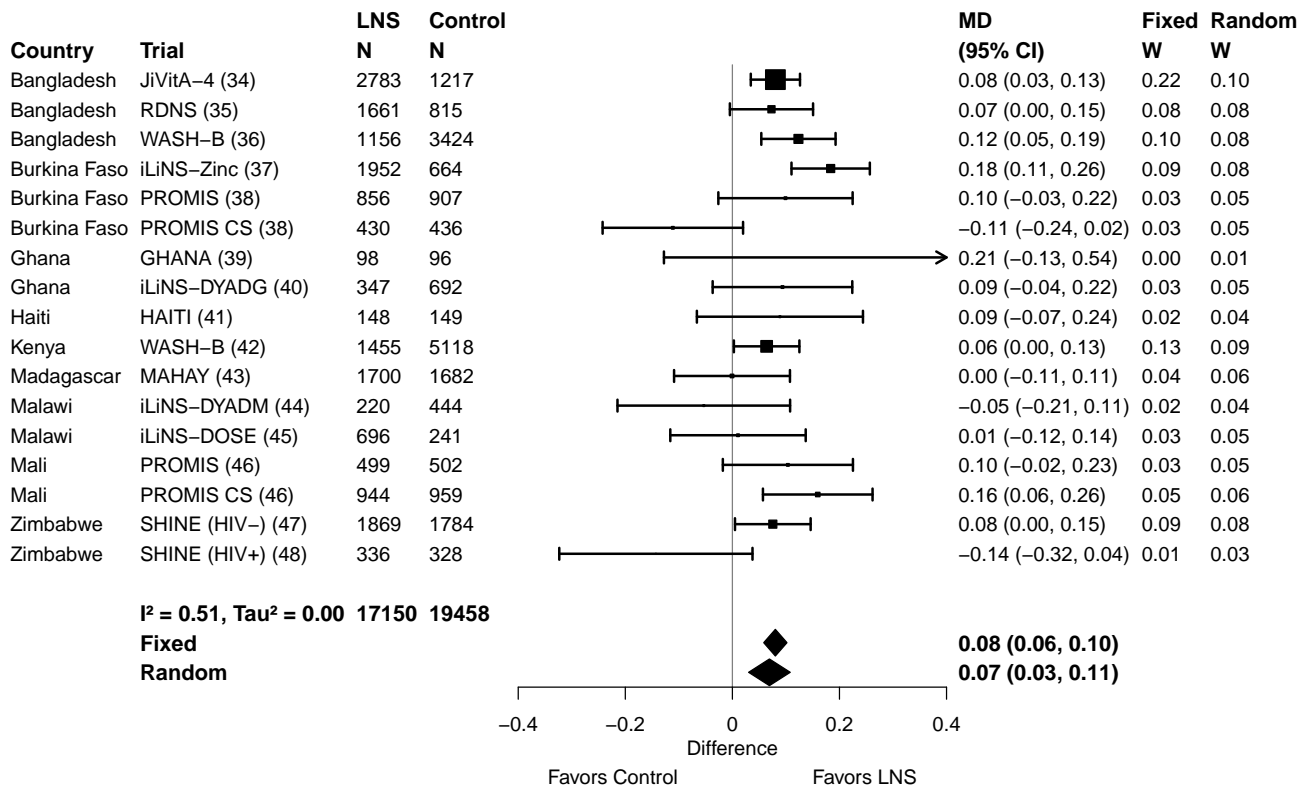

### Supplemental figure 3E: Wasting prevalence ratio

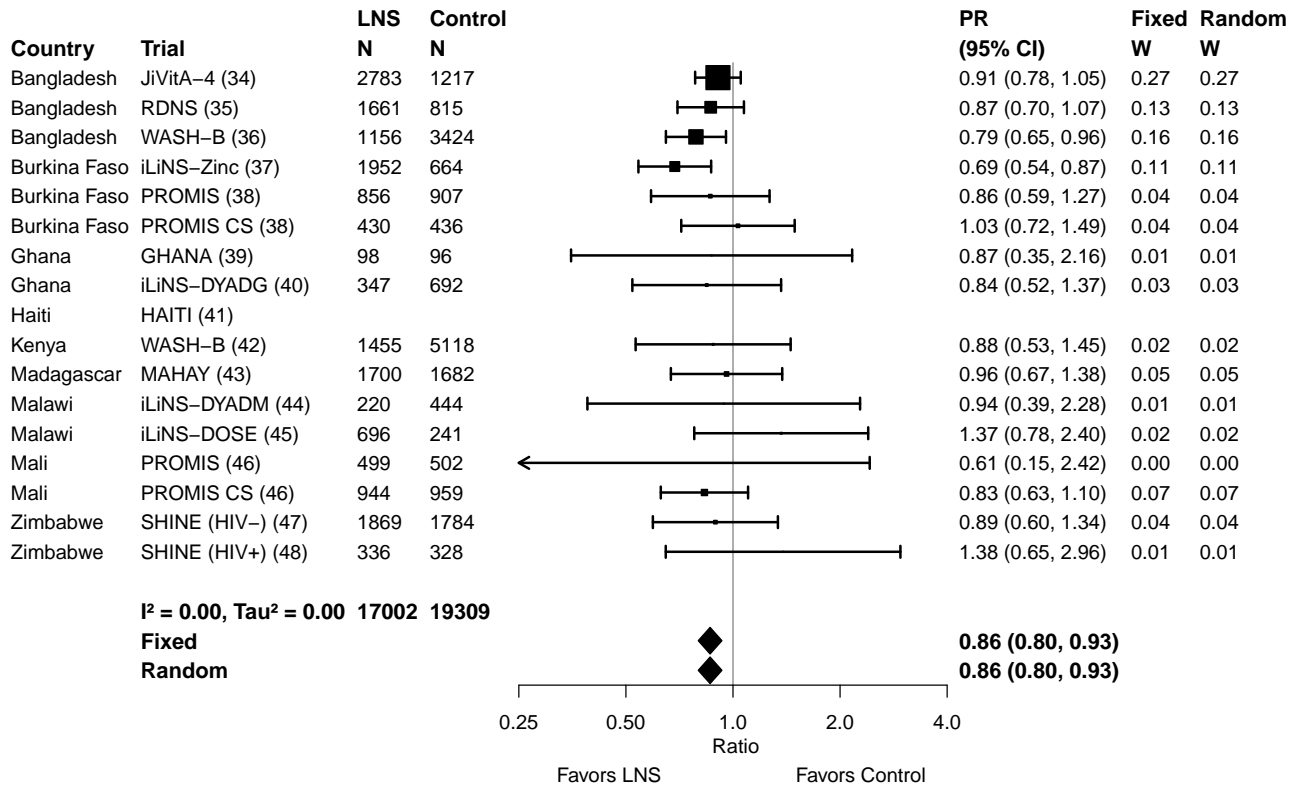

### Supplemental figure 3F: Wasting prevalence difference

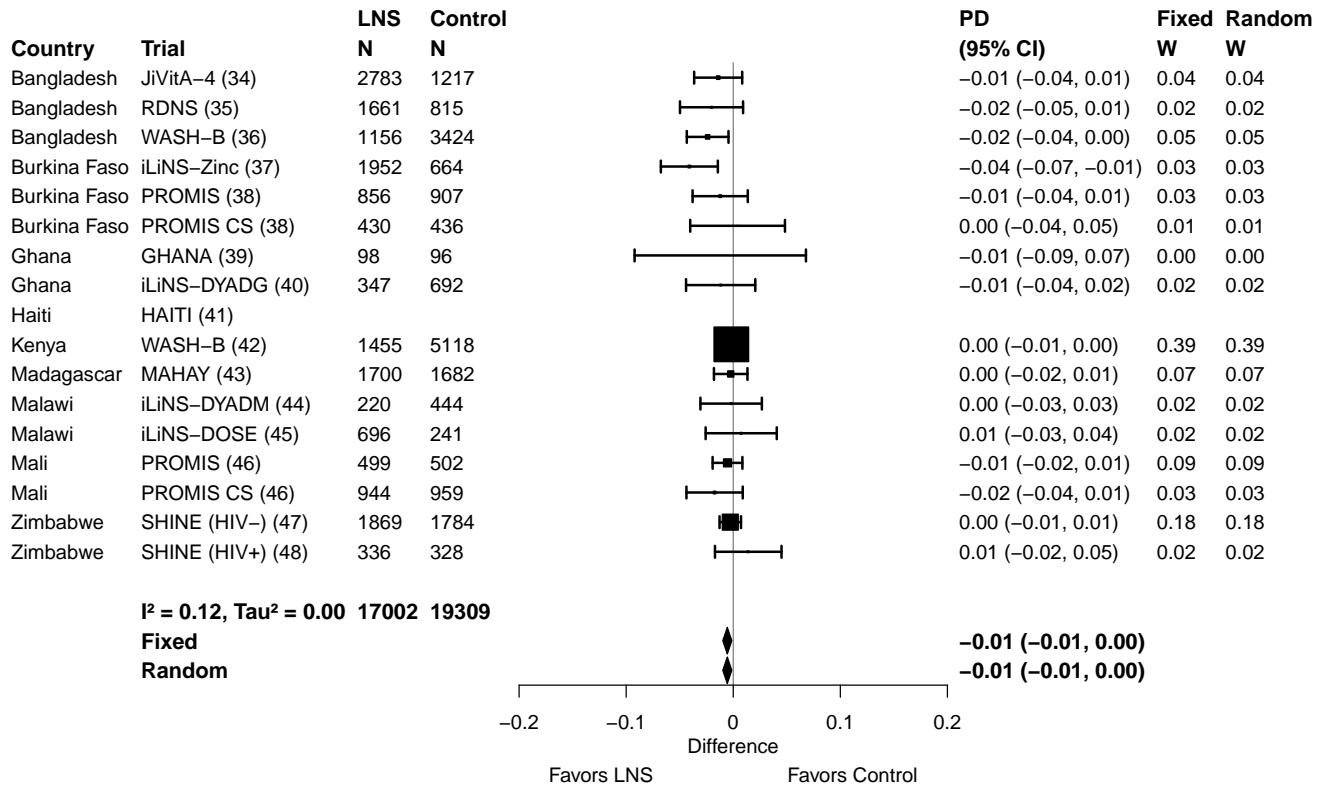

### Supplemental figure 3G: Mean difference in MUACZ

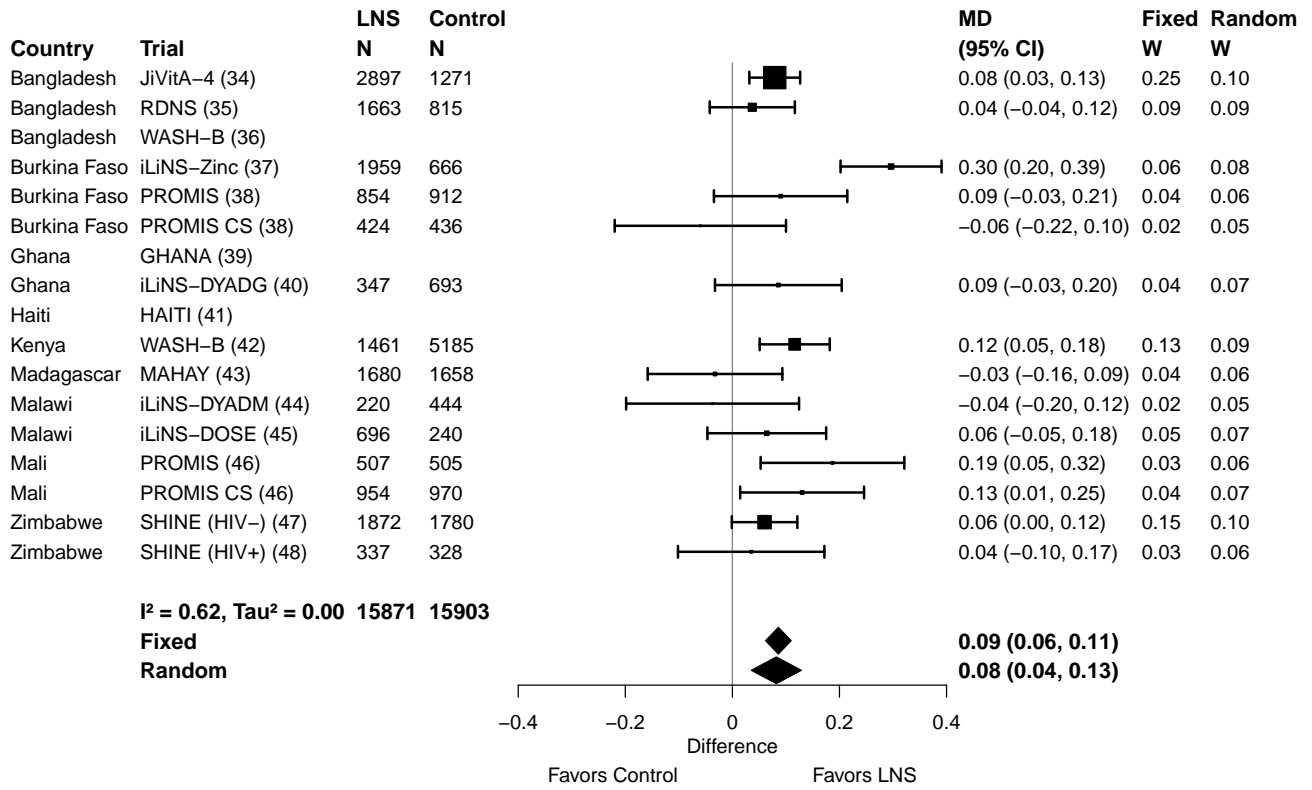

### Supplemental figure 3H: Low MUAC prevalence ratio

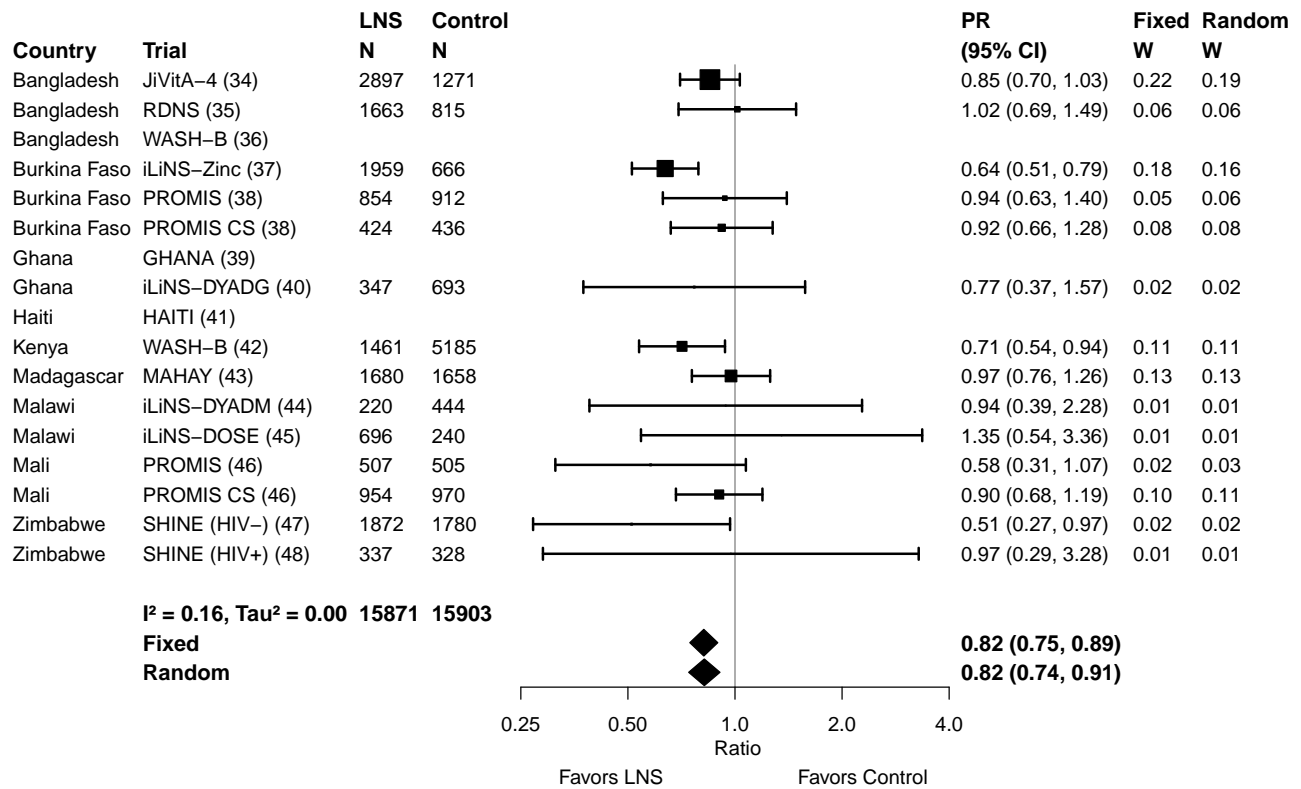

### Supplemental figure 3I: Low MUAC prevalence difference

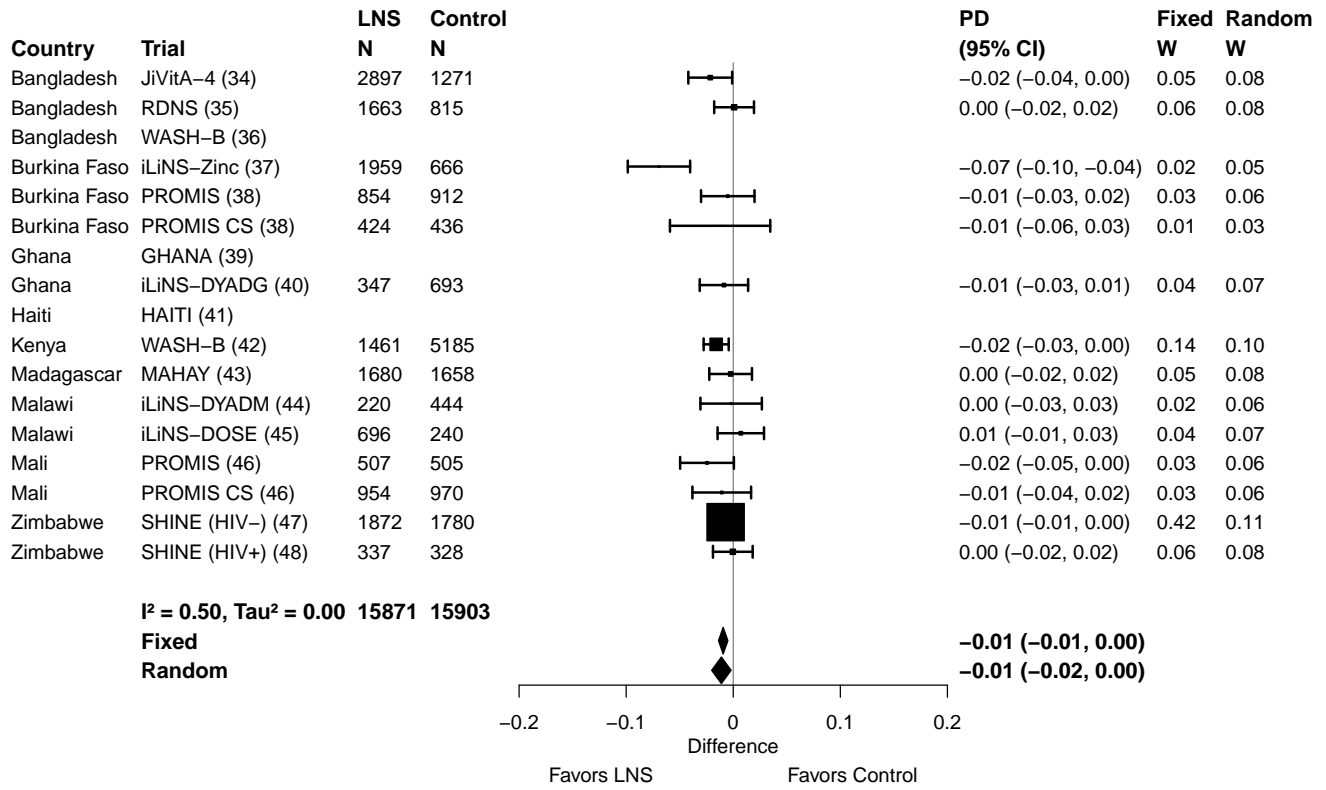

### Supplemental figure 3J: Acute malnutrition prevalence ratio

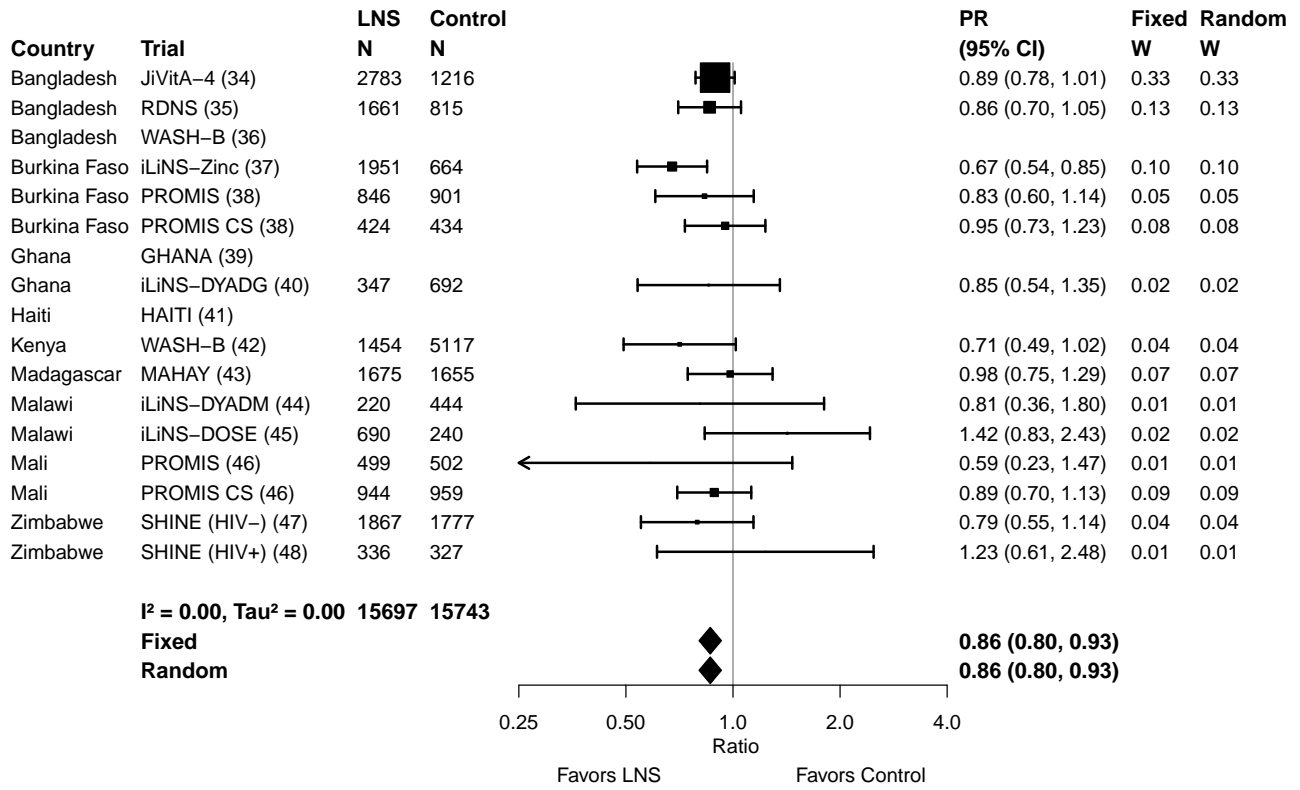



### Supplemental figure 3K: Acute malnutrition prevalence difference

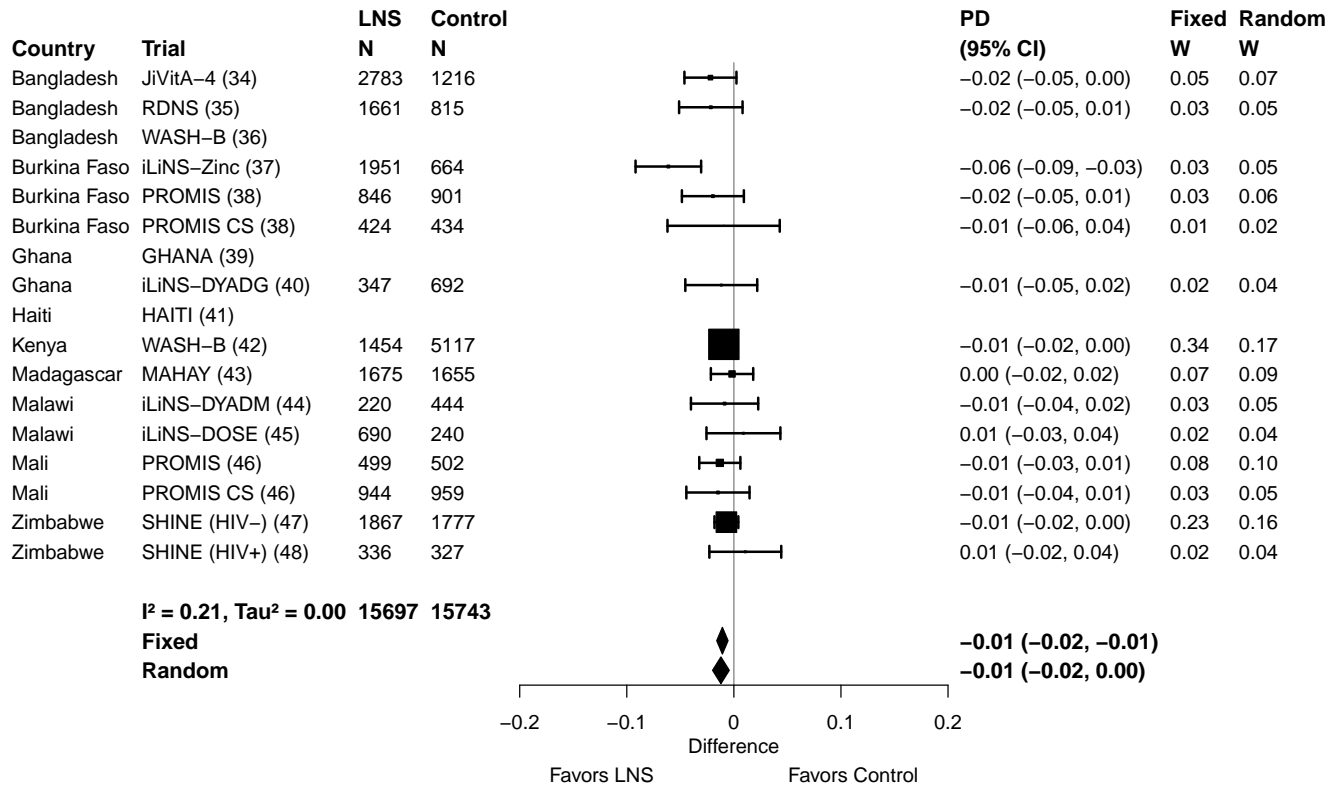

### Supplemental figure 3L: Mean difference in WAZ

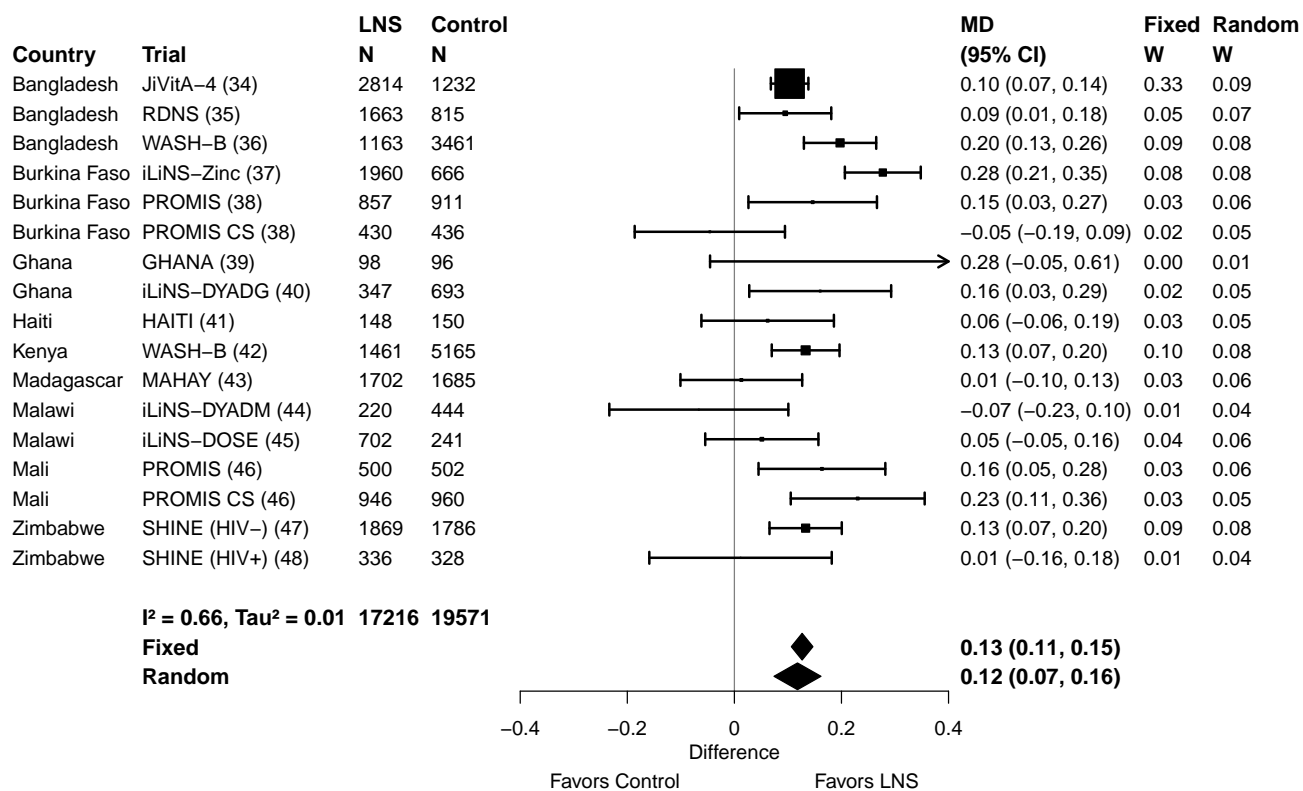

### Supplemental figure 3M: Underweight prevalence ratio

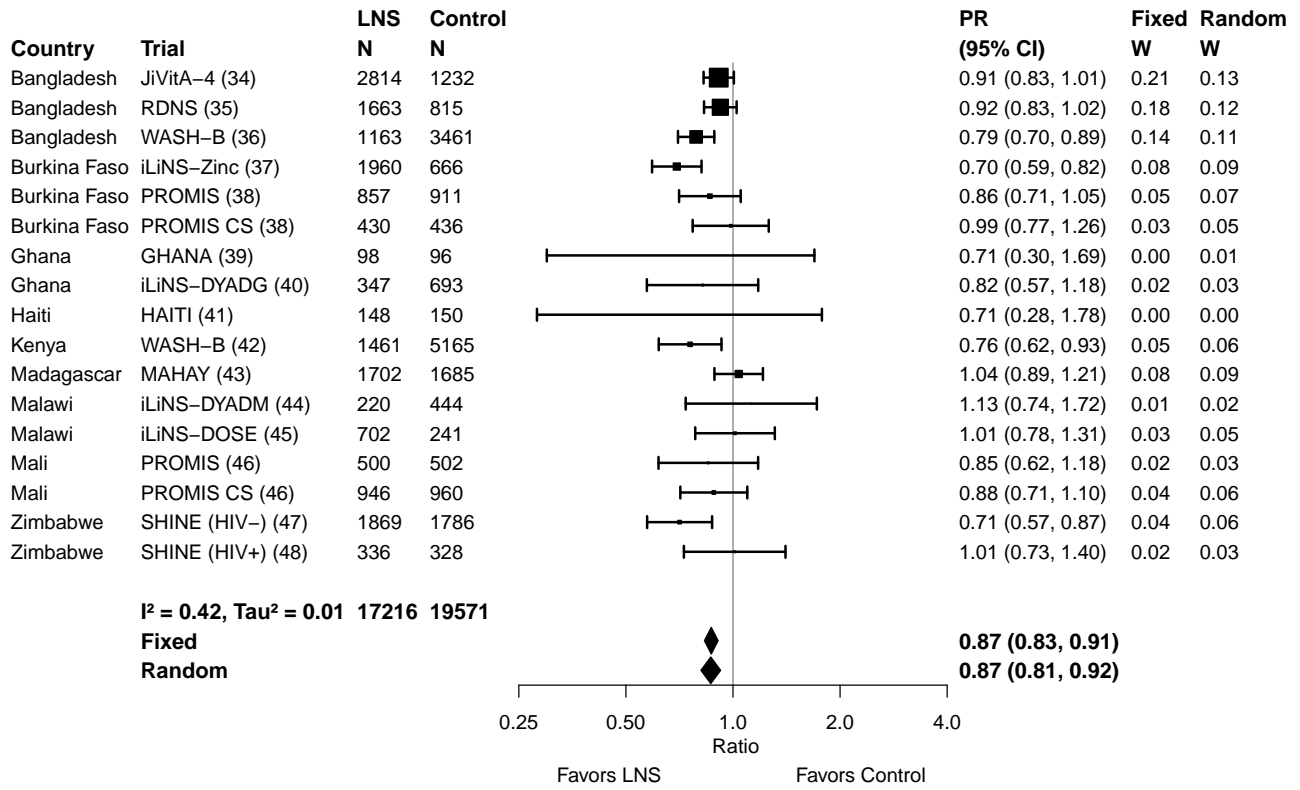

### Supplemental figure 3N: Underweight prevalence difference

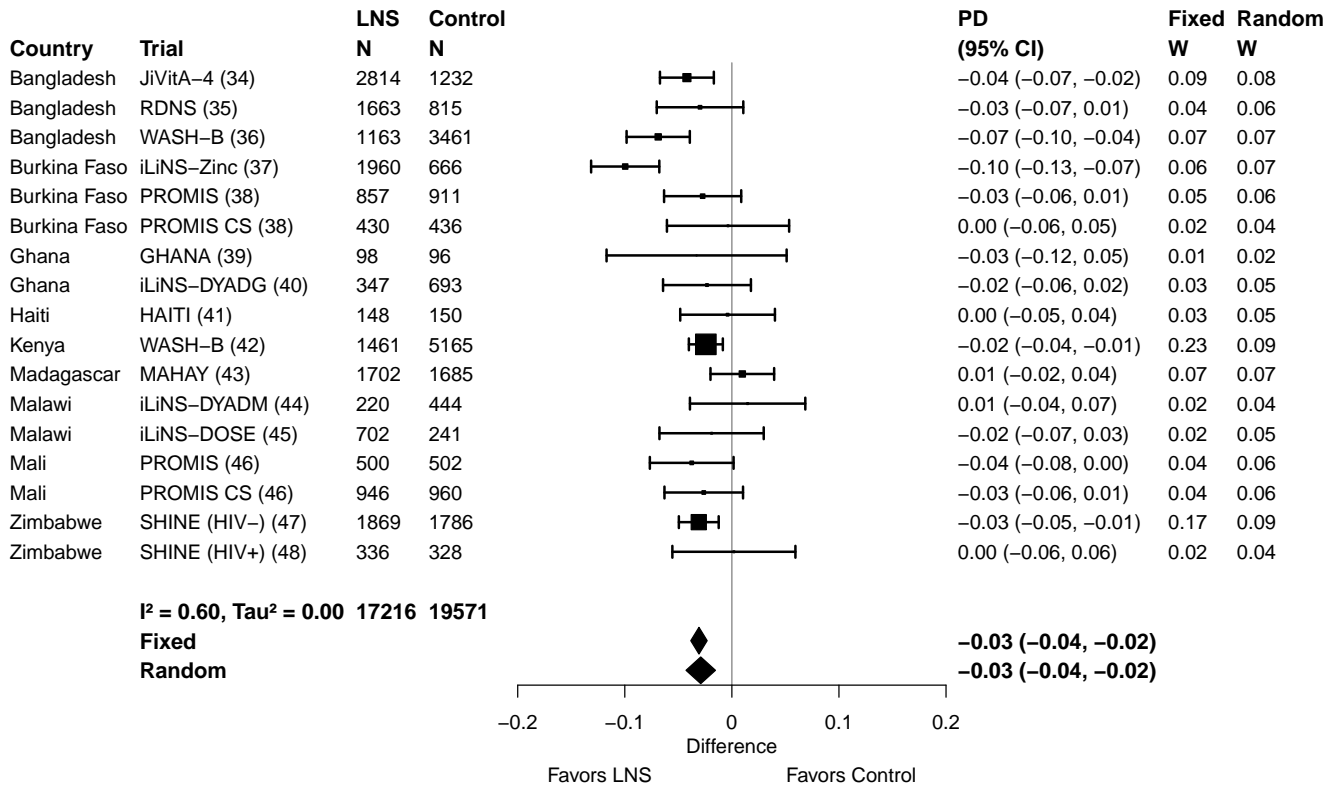

### Supplemental figure 3O: Mean difference in HCZ

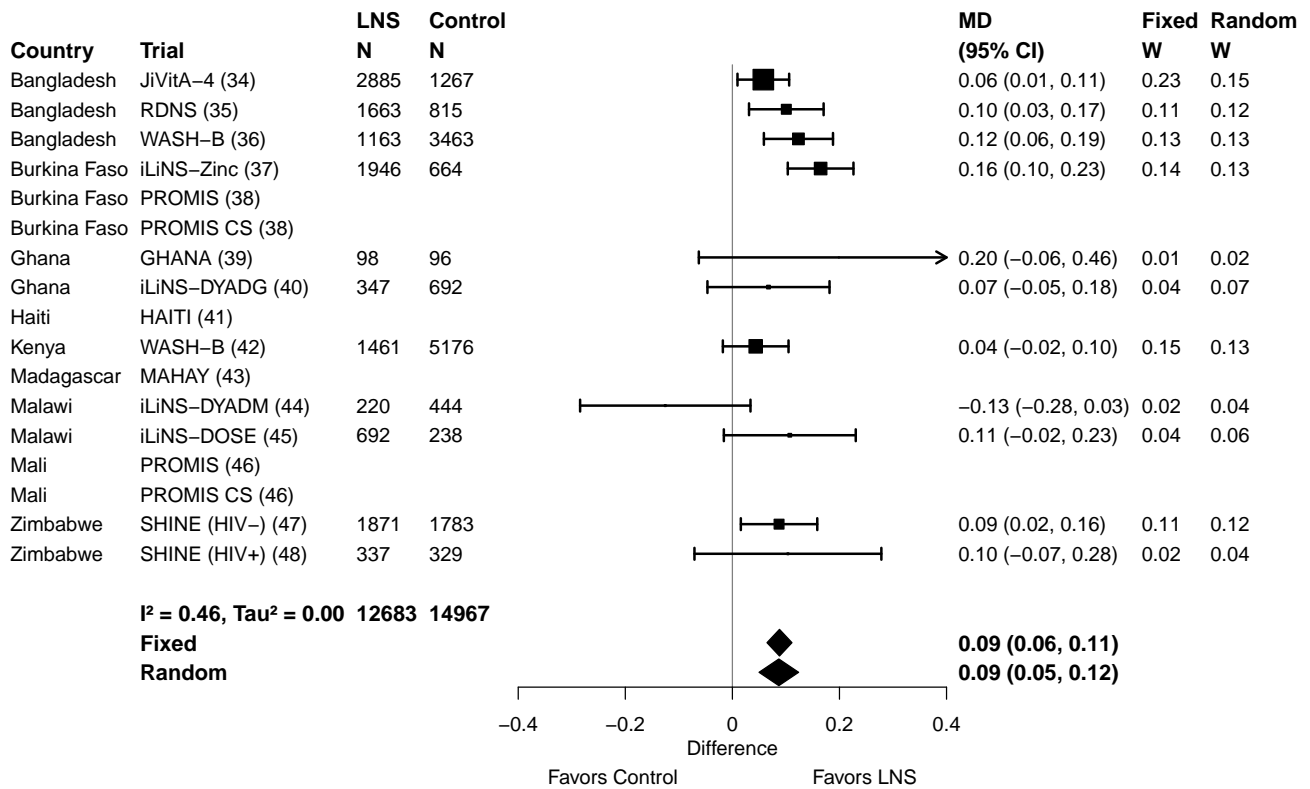

### Supplemental figure 3P: Small head size prevalence ratio

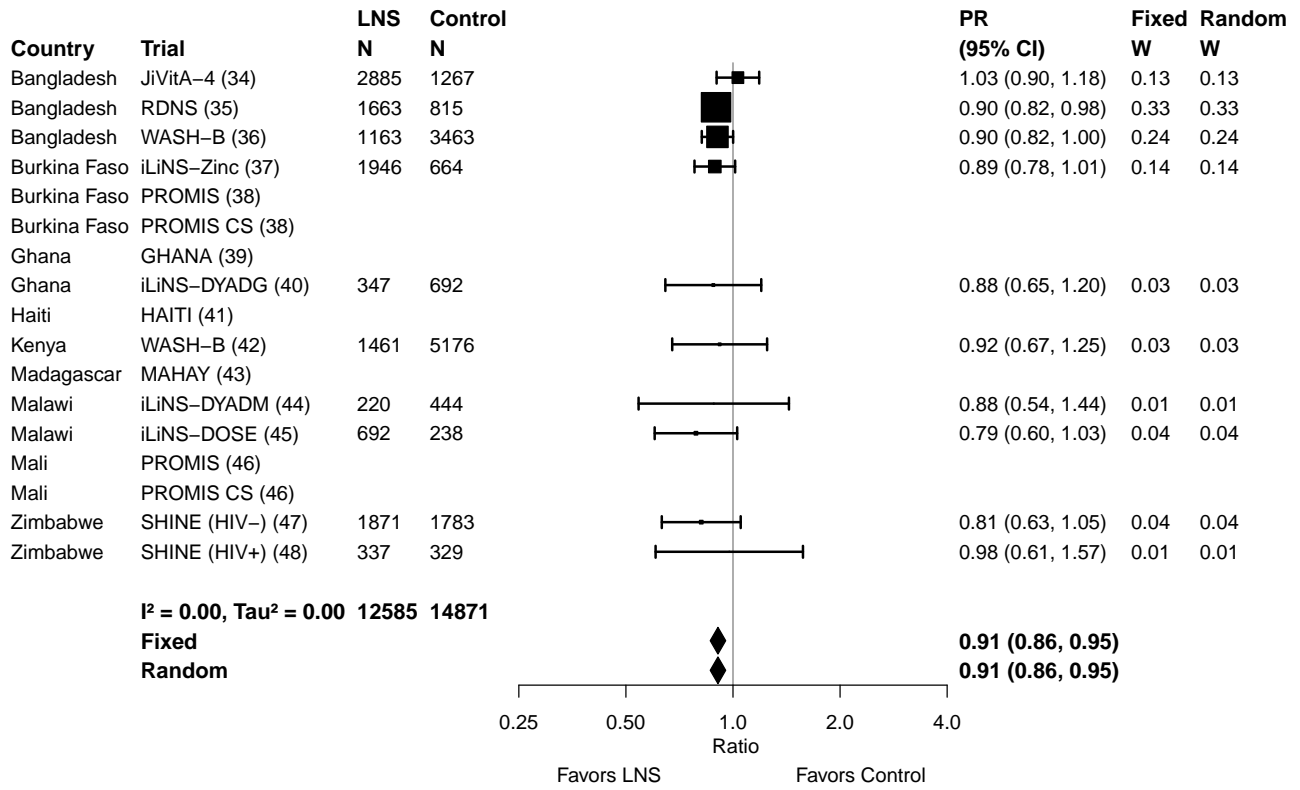

### Supplemental figure 3Q: Small head size prevalence difference

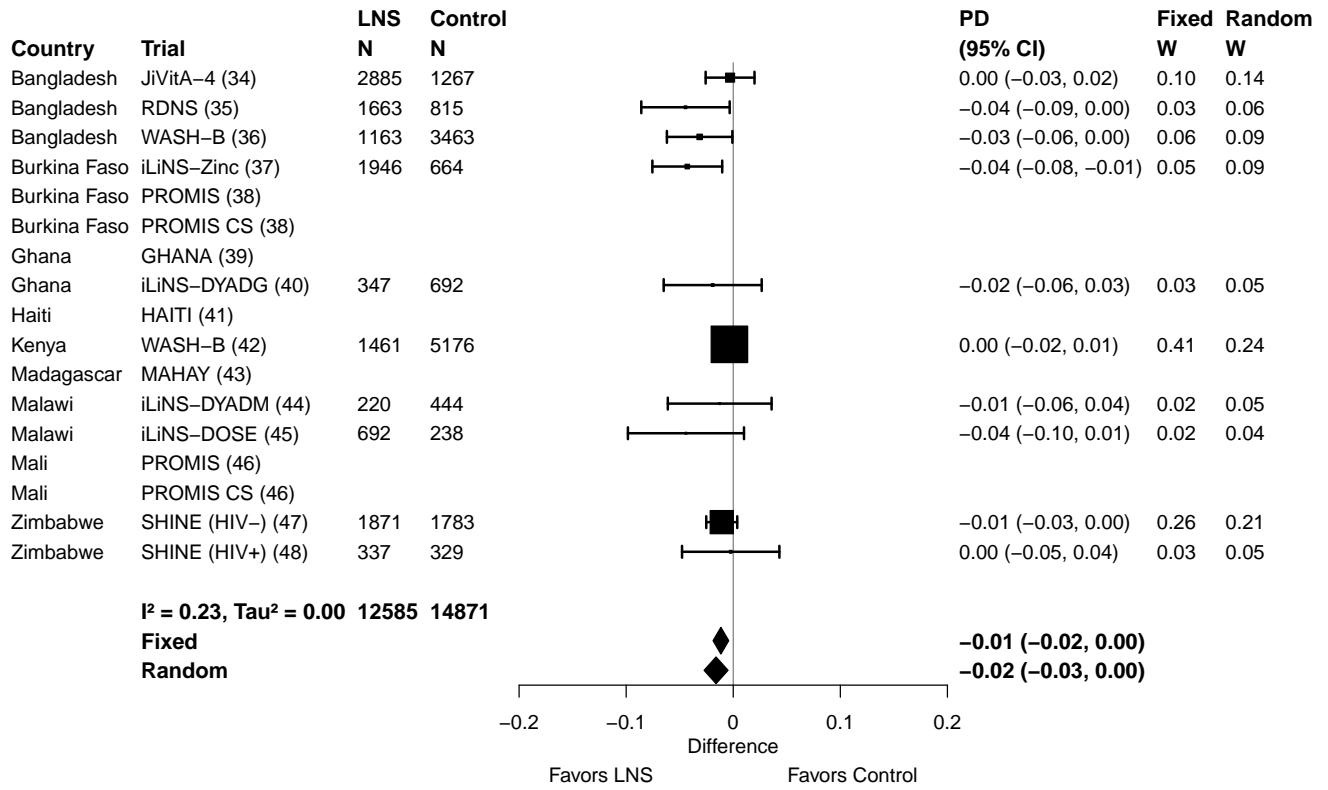

# Supplemental figure 4: Forest plots for effects of SQ-LNS on growth outcomes stratified by study-level effect modifiers

## Contents

|                                                               |           |
|---------------------------------------------------------------|-----------|
| <b>Supplemental figure 4A: Mean difference in LAZ</b>         | <b>6</b>  |
| 4A1: Stratified by Geographic region . . . . .                | 6         |
| 4A2: Stratified by Stunting burden . . . . .                  | 7         |
| 4A3: Stratified by Malaria prevalence . . . . .               | 8         |
| 4A4: Stratified by Source water quality . . . . .             | 9         |
| 4A5: Stratified by Sanitation . . . . .                       | 10        |
| 4A6: Stratified by Supplement duration . . . . .              | 11        |
| 4A7: Stratified by Frequency of contact . . . . .             | 12        |
| 4A8: Stratified by Average SQ-LNS compliance . . . . .        | 13        |
| <br>                                                          |           |
| <b>Supplemental figure 4B: Stunting prevalence ratio</b>      | <b>14</b> |
| 4B1: Stratified by Geographic region . . . . .                | 14        |
| 4B2: Stratified by Stunting burden . . . . .                  | 15        |
| 4B3: Stratified by Malaria prevalence . . . . .               | 16        |
| 4B4: Stratified by Source water quality . . . . .             | 17        |
| 4B5: Stratified by Sanitation . . . . .                       | 18        |
| 4B6: Stratified by Supplement duration . . . . .              | 19        |
| 4B7: Stratified by Frequency of contact . . . . .             | 20        |
| 4B8: Stratified by Average SQ-LNS compliance . . . . .        | 21        |
| <br>                                                          |           |
| <b>Supplemental figure 4C: Stunting prevalence difference</b> | <b>22</b> |
| 4C1: Stratified by Geographic region . . . . .                | 22        |
| 4C2: Stratified by Stunting burden . . . . .                  | 23        |
| 4C3: Stratified by Malaria prevalence . . . . .               | 24        |
| 4C4: Stratified by Source water quality . . . . .             | 25        |
| 4C5: Stratified by Sanitation . . . . .                       | 26        |
| 4C6: Stratified by Supplement duration . . . . .              | 27        |
| 4C7: Stratified by Frequency of contact . . . . .             | 28        |
| 4C8: Stratified by Average SQ-LNS compliance . . . . .        | 29        |



|                                                                           |           |
|---------------------------------------------------------------------------|-----------|
| <b>Supplemental figure 4D: Mean difference in WLZ</b>                     | <b>30</b> |
| 4D1: Stratified by Geographic region . . . . .                            | 30        |
| 4D2: Stratified by Stunting burden . . . . .                              | 31        |
| 4D3: Stratified by Malaria prevalence . . . . .                           | 32        |
| 4D4: Stratified by Source water quality . . . . .                         | 33        |
| 4D5: Stratified by Sanitation . . . . .                                   | 34        |
| 4D6: Stratified by Supplement duration . . . . .                          | 35        |
| 4D7: Stratified by Frequency of contact . . . . .                         | 36        |
| 4D8: Stratified by Average SQ-LNS compliance . . . . .                    | 37        |
| <br>                                                                      |           |
| <b>Supplemental figure 4E: Wasting prevalence ratio</b>                   | <b>38</b> |
| 4E1: Stratified by Geographic region . . . . .                            | 38        |
| 4E2: Stratified by Stunting burden . . . . .                              | 39        |
| 4E3: Stratified by Malaria prevalence . . . . .                           | 40        |
| 4E4: Stratified by Source water quality . . . . .                         | 41        |
| 4E5: Stratified by Sanitation . . . . .                                   | 42        |
| 4E6: Stratified by Supplement duration . . . . .                          | 43        |
| 4E7: Stratified by Frequency of contact . . . . .                         | 44        |
| 4E8: Stratified by Average SQ-LNS compliance . . . . .                    | 45        |
| <br>                                                                      |           |
| <b>Supplemental figure 4F: Wasting prevalence difference</b>              | <b>46</b> |
| 4F1: Stratified by Geographic region . . . . .                            | 46        |
| 4F2: Stratified by Stunting burden . . . . .                              | 47        |
| 4F3: Stratified by Malaria prevalence . . . . .                           | 48        |
| 4F4: Stratified by Source water quality . . . . .                         | 49        |
| 4F5: Stratified by Sanitation . . . . .                                   | 50        |
| 4F6: Stratified by Supplement duration . . . . .                          | 51        |
| 4F7: Stratified by Frequency of contact . . . . .                         | 52        |
| 4F8: Stratified by Average SQ-LNS compliance . . . . .                    | 53        |
| <br>                                                                      |           |
| <b>Supplemental figure 4G: Mean difference in MUACZ</b>                   | <b>54</b> |
| 4G1: Stratified by Geographic region (insufficient comparisons) . . . . . | 54        |
| 4G2: Stratified by Stunting burden . . . . .                              | 55        |
| 4G3: Stratified by Malaria prevalence . . . . .                           | 56        |
| 4G4: Stratified by Source water quality . . . . .                         | 57        |
| 4G5: Stratified by Sanitation . . . . .                                   | 58        |
| 4G6: Stratified by Supplement duration . . . . .                          | 59        |
| 4G7: Stratified by Frequency of contact . . . . .                         | 60        |
| 4G8: Stratified by Average SQ-LNS compliance . . . . .                    | 61        |
| <br>                                                                      |           |
| <b>Supplemental figure 4H: Low MUAC prevalence ratio</b>                  | <b>62</b> |
| 4H1: Stratified by Geographic region (insufficient comparisons) . . . . . | 62        |

|                                                                           |           |
|---------------------------------------------------------------------------|-----------|
| 4H2: Stratified by Stunting burden . . . . .                              | 63        |
| 4H3: Stratified by Malaria prevalence . . . . .                           | 64        |
| 4H4: Stratified by Source water quality . . . . .                         | 65        |
| 4H5: Stratified by Sanitation . . . . .                                   | 66        |
| 4H6: Stratified by Supplement duration . . . . .                          | 67        |
| 4H7: Stratified by Frequency of contact . . . . .                         | 68        |
| 4H8: Stratified by Average SQ-LNS compliance . . . . .                    | 69        |
| <b>Supplemental figure 4I: Low MUAC prevalence difference</b>             | <b>70</b> |
| 4I1: Stratified by Geographic region (insufficient comparisons) . . . . . | 70        |
| 4I2: Stratified by Stunting burden . . . . .                              | 71        |
| 4I3: Stratified by Malaria prevalence . . . . .                           | 72        |
| 4I4: Stratified by Source water quality . . . . .                         | 73        |
| 4I5: Stratified by Sanitation . . . . .                                   | 74        |
| 4I6: Stratified by Supplement duration . . . . .                          | 75        |
| 4I7: Stratified by Frequency of contact . . . . .                         | 76        |
| 4I8: Stratified by Average SQ-LNS compliance . . . . .                    | 77        |
| <b>Supplemental figure 4J: Acute malnutrition prevalence ratio</b>        | <b>78</b> |
| 4J1: Stratified by Geographic region (insufficient comparisons) . . . . . | 78        |
| 4J2: Stratified by Stunting burden . . . . .                              | 79        |
| 4J3: Stratified by Malaria prevalence . . . . .                           | 80        |
| 4J4: Stratified by Source water quality . . . . .                         | 81        |
| 4J5: Stratified by Sanitation . . . . .                                   | 82        |
| 4J6: Stratified by Supplement duration . . . . .                          | 83        |
| 4J7: Stratified by Frequency of contact . . . . .                         | 84        |
| 4J8: Stratified by Average SQ-LNS compliance . . . . .                    | 85        |
| <b>Supplemental figure 4K: Acute malnutrition prevalence difference</b>   | <b>86</b> |
| 4K1: Stratified by Geographic region (insufficient comparisons) . . . . . | 86        |
| 4K2: Stratified by Stunting burden . . . . .                              | 87        |
| 4K3: Stratified by Malaria prevalence . . . . .                           | 88        |
| 4K4: Stratified by Source water quality . . . . .                         | 89        |
| 4K5: Stratified by Sanitation . . . . .                                   | 90        |
| 4K6: Stratified by Supplement duration . . . . .                          | 91        |
| 4K7: Stratified by Frequency of contact . . . . .                         | 92        |
| 4K8: Stratified by Average SQ-LNS compliance . . . . .                    | 93        |
| <b>Supplemental figure 4L: Mean difference in WAZ</b>                     | <b>94</b> |
| 4L1: Stratified by Geographic region . . . . .                            | 94        |
| 4L2: Stratified by Stunting burden . . . . .                              | 95        |
| 4L3: Stratified by Malaria prevalence . . . . .                           | 96        |

|                                                                  |            |
|------------------------------------------------------------------|------------|
| 4L4: Stratified by Source water quality . . . . .                | 97         |
| 4L5: Stratified by Sanitation . . . . .                          | 98         |
| 4L6: Stratified by Supplement duration . . . . .                 | 99         |
| 4L7: Stratified by Frequency of contact . . . . .                | 100        |
| 4L8: Stratified by Average SQ-LNS compliance . . . . .           | 101        |
| <b>Supplemental figure 4M: Underweight prevalence ratio</b>      | <b>102</b> |
| 4M1: Stratified by Geographic region . . . . .                   | 102        |
| 4M2: Stratified by Stunting burden . . . . .                     | 103        |
| 4M3: Stratified by Malaria prevalence . . . . .                  | 104        |
| 4M4: Stratified by Source water quality . . . . .                | 105        |
| 4M5: Stratified by Sanitation . . . . .                          | 106        |
| 4M6: Stratified by Supplement duration . . . . .                 | 107        |
| 4M7: Stratified by Frequency of contact . . . . .                | 108        |
| 4M8: Stratified by Average SQ-LNS compliance . . . . .           | 109        |
| <b>Supplemental figure 4N: Underweight prevalence difference</b> | <b>110</b> |
| 4N1: Stratified by Geographic region . . . . .                   | 110        |
| 4N2: Stratified by Stunting burden . . . . .                     | 111        |
| 4N3: Stratified by Malaria prevalence . . . . .                  | 112        |
| 4N4: Stratified by Source water quality . . . . .                | 113        |
| 4N5: Stratified by Sanitation . . . . .                          | 114        |
| 4N6: Stratified by Supplement duration . . . . .                 | 115        |
| 4N7: Stratified by Frequency of contact . . . . .                | 116        |
| 4N8: Stratified by Average SQ-LNS compliance . . . . .           | 117        |
| <b>Supplemental figure 4O: Mean difference in HCZ</b>            | <b>118</b> |
| 4O1: Stratified by Geographic region . . . . .                   | 118        |
| 4O2: Stratified by Stunting burden . . . . .                     | 119        |
| 4O3: Stratified by Malaria prevalence . . . . .                  | 120        |
| 4O4: Stratified by Source water quality . . . . .                | 121        |
| 4O5: Stratified by Sanitation . . . . .                          | 122        |
| 4O6: Stratified by Supplement duration . . . . .                 | 123        |
| 4O7: Stratified by Frequency of contact . . . . .                | 124        |
| 4O8: Stratified by Average SQ-LNS compliance . . . . .           | 125        |
| <b>Supplemental figure 4P: Small head size prevalence ratio</b>  | <b>126</b> |
| 4P1: Stratified by Geographic region . . . . .                   | 126        |
| 4P2: Stratified by Stunting burden . . . . .                     | 127        |
| 4P3: Stratified by Malaria prevalence . . . . .                  | 128        |
| 4P4: Stratified by Source water quality . . . . .                | 129        |
| 4P5: Stratified by Sanitation . . . . .                          | 130        |

|                                                                      |            |
|----------------------------------------------------------------------|------------|
| 4P6: Stratified by Supplement duration . . . . .                     | 131        |
| 4P7: Stratified by Frequency of contact . . . . .                    | 132        |
| 4P8: Stratified by Average SQ-LNS compliance . . . . .               | 133        |
| <b>Supplemental figure 4Q: Small head size prevalence difference</b> | <b>134</b> |
| 4Q1: Stratified by Geographic region . . . . .                       | 134        |
| 4Q2: Stratified by Stunting burden . . . . .                         | 135        |
| 4Q3: Stratified by Malaria prevalence . . . . .                      | 136        |
| 4Q4: Stratified by Source water quality . . . . .                    | 137        |
| 4Q5: Stratified by Sanitation . . . . .                              | 138        |
| 4Q6: Stratified by Supplement duration . . . . .                     | 139        |
| 4Q7: Stratified by Frequency of contact . . . . .                    | 140        |
| 4Q8: Stratified by Average SQ-LNS compliance . . . . .               | 141        |

These figures are forest plots showing the study-level effect modification of intervention effects. Each figure shows the study-level estimates along with the corresponding pooled estimate grouped by study-level effect modifier category. For dichotomous outcomes analyzed via prevalence ratios, the effect estimate is the prevalence in the LNS group divided by the prevalence in the control group. For dichotomous outcomes analyzed via prevalence differences, the effect estimate is the prevalence in the LNS group minus the prevalence in the control group. The labels on the left y-axis correspond to trial level information. The values on the right indicate the study level effect estimate, confidence interval, and weighting for deriving the pooled estimates. LAZ, length-for-age z-score; WLZ, weight-for-length z-score; WAZ, weight-for-age z-score; MUACZ, mid-upper arm circumference z-score; HCZ, head circumference-for-age z-score.

## Supplemental figure 4A: Mean difference in LAZ

### 4A1: Stratified by Geographic region

#### Geographic region

( $p$ -diff = 0.636)

#### Geographic region – SEAR

| Country    | Trial         | N           | N           |
|------------|---------------|-------------|-------------|
| Bangladesh | JiVitA-4 (34) | 2838        | 1244        |
| Bangladesh | RDNS (35)     | 1663        | 815         |
| Bangladesh | WASH-B (36)   | 1158        | 3431        |
|            |               | <b>5659</b> | <b>5490</b> |

$I^2 = 0.78$ ,  $\tau^2 = 0.00$

#### Geographic region – AFR

|              |                   |              |              |
|--------------|-------------------|--------------|--------------|
| Burkina Faso | iLiNS-Zinc (37)   | 1952         | 664          |
| Burkina Faso | PROMIS (38)       | 863          | 914          |
| Burkina Faso | PROMIS CS (38)    | 430          | 439          |
| Ghana        | GHANA (39)        | 98           | 96           |
| Ghana        | iLiNS-DYADG (40)  | 347          | 692          |
| Kenya        | WASH-B (42)       | 1457         | 5137         |
| Madagascar   | MAHAY (43)        | 1702         | 1682         |
| Malawi       | iLiNS-DYADM (44)  | 220          | 444          |
| Malawi       | iLiNS-DOSE (45)   | 696          | 241          |
| Mali         | PROMIS (46)       | 506          | 506          |
| Mali         | PROMIS CS (46)    | 952          | 969          |
| Zimbabwe     | SHINE (HIV-) (47) | 1880         | 1794         |
| Zimbabwe     | SHINE (HIV+) (48) | 337          | 330          |
|              |                   | <b>11440</b> | <b>13908</b> |

$I^2 = 0.60$ ,  $\tau^2 = 0.01$

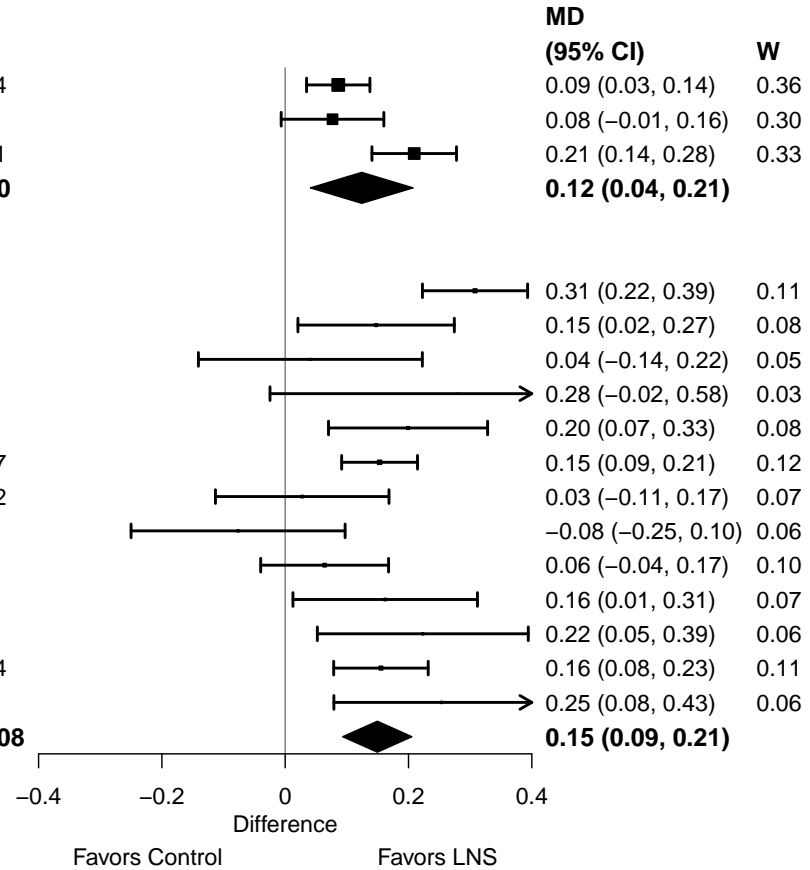

Supplemental figure 4A: Mean difference in LAZ

4A2: Stratified by Stunting burden

**Stunting burden**

(p-diff = 0.309)

**Stunting burden – Less than 35%**

| Country                                             | Trial            | N           | N           |
|-----------------------------------------------------|------------------|-------------|-------------|
| Burkina Faso                                        | PROMIS (38)      | 863         | 914         |
| Burkina Faso                                        | PROMIS CS (38)   | 430         | 439         |
| Ghana                                               | GHANA (39)       | 98          | 96          |
| Ghana                                               | iLiNS-DYADG (40) | 347         | 692         |
| Haiti                                               | HAITI (41)       | 149         | 149         |
| Kenya                                               | WASH-B (42)      | 1457        | 5137        |
| Malawi                                              | iLiNS-DYADM (44) | 220         | 444         |
| <b>I<sup>2</sup> = 0.53, Tau<sup>2</sup> = 0.01</b> |                  | <b>3564</b> | <b>7871</b> |

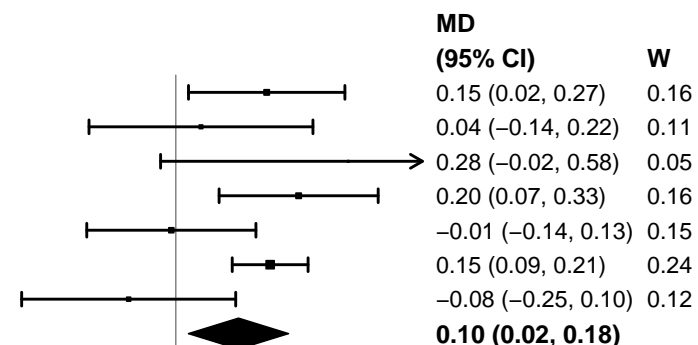

**Stunting burden – More than 35%**

|                                                     |                   |              |              |
|-----------------------------------------------------|-------------------|--------------|--------------|
| Bangladesh                                          | JiVitA-4 (34)     | 2838         | 1244         |
| Bangladesh                                          | RDNS (35)         | 1663         | 815          |
| Bangladesh                                          | WASH-B (36)       | 1158         | 3431         |
| Burkina Faso                                        | iLiNS-Zinc (37)   | 1952         | 664          |
| Madagascar                                          | MAHAY (43)        | 1702         | 1682         |
| Malawi                                              | iLiNS-DOSE (45)   | 696          | 241          |
| Mali                                                | PROMIS (46)       | 506          | 506          |
| Mali                                                | PROMIS CS (46)    | 952          | 969          |
| Zimbabwe                                            | SHINE (HIV-) (47) | 1880         | 1794         |
| Zimbabwe                                            | SHINE (HIV+) (48) | 337          | 330          |
| <b>I<sup>2</sup> = 0.72, Tau<sup>2</sup> = 0.01</b> |                   | <b>13684</b> | <b>11676</b> |

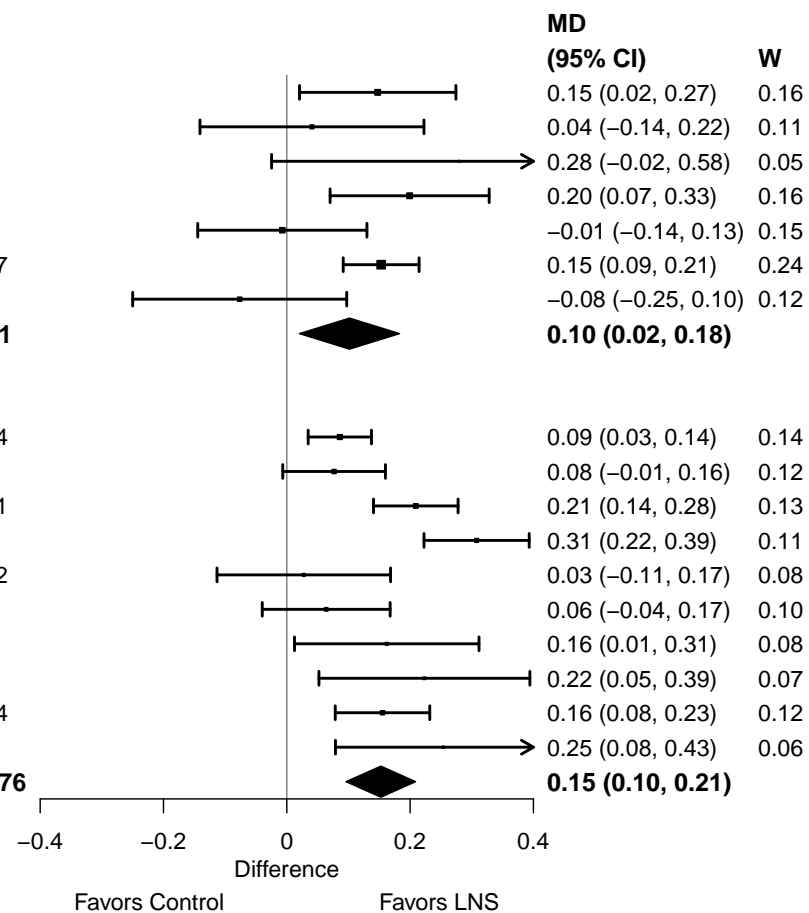

Supplemental figure 4A: Mean difference in LAZ

4A3: Stratified by Malaria prevalence

**Malaria prevalence**  
(p-diff = 0.508)

**Malaria prevalence – Less than 10%**

| Country    | Trial             | N            | N            |
|------------|-------------------|--------------|--------------|
| Bangladesh | JiVitA-4 (34)     | 2838         | 1244         |
| Bangladesh | RDNS (35)         | 1663         | 815          |
| Bangladesh | WASH-B (36)       | 1158         | 3431         |
| Haiti      | HAITI (41)        | 149          | 149          |
| Kenya      | WASH-B (42)       | 1457         | 5137         |
| Madagascar | MAHAY (43)        | 1702         | 1682         |
| Zimbabwe   | SHINE (HIV-) (47) | 1880         | 1794         |
| Zimbabwe   | SHINE (HIV+) (48) | 337          | 330          |
|            |                   | <b>11184</b> | <b>14582</b> |

**I<sup>2</sup> = 0.62, Tau<sup>2</sup> = 0.00**

**Malaria prevalence – At least 10%**

|              |                  |             |             |
|--------------|------------------|-------------|-------------|
| Burkina Faso | iLiNS-Zinc (37)  | 1952        | 664         |
| Burkina Faso | PROMIS (38)      | 863         | 914         |
| Burkina Faso | PROMIS CS (38)   | 430         | 439         |
| Ghana        | GHANA (39)       | 98          | 96          |
| Ghana        | iLiNS-DYADG (40) | 347         | 692         |
| Malawi       | iLiNS-DYADM (44) | 220         | 444         |
| Malawi       | iLiNS-DOSE (45)  | 696         | 241         |
| Mali         | PROMIS (46)      | 506         | 506         |
| Mali         | PROMIS CS (46)   | 952         | 969         |
|              |                  | <b>6064</b> | <b>4965</b> |

**I<sup>2</sup> = 0.68, Tau<sup>2</sup> = 0.01**

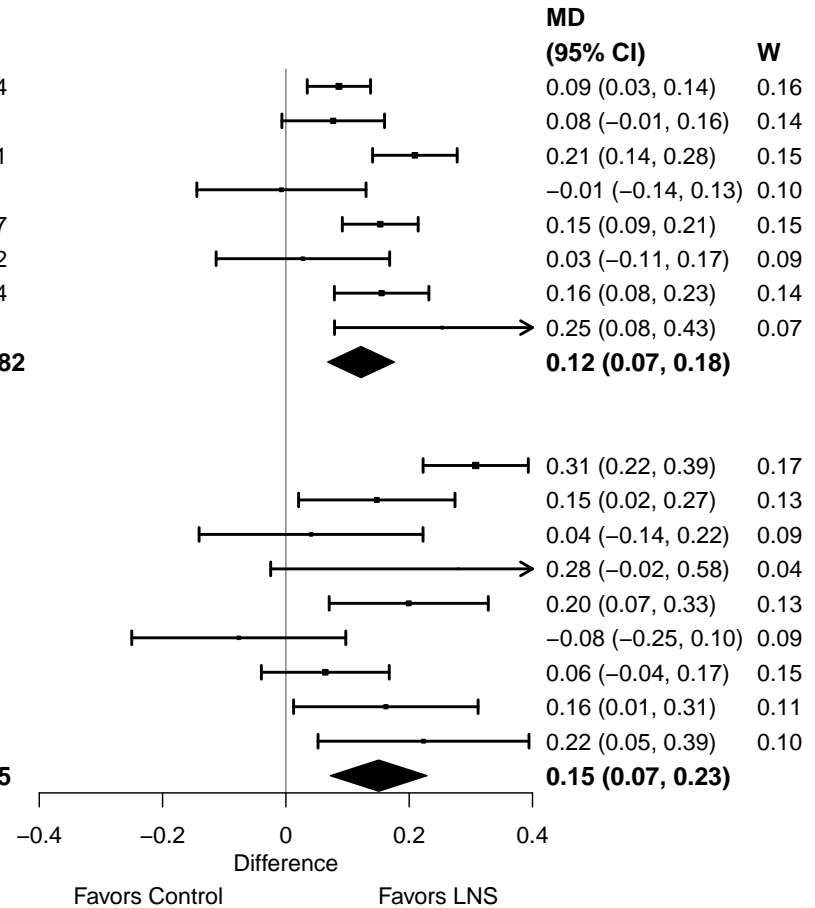

Supplemental figure 4A: Mean difference in LAZ

4A4: Stratified by Source water quality

**Source water quality**  
(p-diff = 0.313)

**Source water quality – Improved**

| Country                                             | Trial            | N                | N    | MD<br>(95% CI)           | W    |
|-----------------------------------------------------|------------------|------------------|------|--------------------------|------|
| Bangladesh                                          | JiVitA-4 (34)    | 2838             | 1244 | 0.09 (0.03, 0.14)        | 0.19 |
| Bangladesh                                          | RDNS (35)        | 1663             | 815  | 0.08 (-0.01, 0.16)       | 0.16 |
| Bangladesh                                          | WASH-B (36)      | 567              | 1104 | 0.26 (0.16, 0.36)        | 0.14 |
| Ghana                                               | GHANA (39)       | 98               | 96   | 0.28 (-0.02, 0.58)       | 0.04 |
| Ghana                                               | iLiNS-DYADG (40) | 347              | 692  | 0.20 (0.07, 0.33)        | 0.12 |
| Haiti                                               | HAITI (41)       | 149              | 149  | -0.01 (-0.14, 0.13)      | 0.11 |
| Malawi                                              | iLiNS-DYADM (44) | 220              | 444  | -0.08 (-0.25, 0.10)      | 0.09 |
| Malawi                                              | iLiNS-DOSE (45)  | 696              | 241  | 0.06 (-0.04, 0.17)       | 0.14 |
| <b>I<sup>2</sup> = 0.65, Tau<sup>2</sup> = 0.01</b> |                  | <b>6578 4785</b> |      | <b>0.10 (0.02, 0.18)</b> |      |

**Source water quality – Unimproved**

|                                                     |                   |                  |      |                          |      |
|-----------------------------------------------------|-------------------|------------------|------|--------------------------|------|
| Burkina Faso                                        | iLiNS-Zinc (37)   | 1952             | 664  | 0.31 (0.22, 0.39)        | 0.16 |
| Burkina Faso                                        | PROMIS (38)       | 863              | 914  | 0.15 (0.02, 0.27)        | 0.12 |
| Burkina Faso                                        | PROMIS CS (38)    | 430              | 439  | 0.04 (-0.14, 0.22)       | 0.09 |
| Kenya                                               | WASH-B (42)       | 695              | 2253 | 0.11 (0.00, 0.21)        | 0.14 |
| Madagascar                                          | MAHAY (43)        | 1702             | 1682 | 0.03 (-0.11, 0.17)       | 0.11 |
| Mali                                                | PROMIS (46)       | 506              | 506  | 0.16 (0.01, 0.31)        | 0.11 |
| Mali                                                | PROMIS CS (46)    | 952              | 969  | 0.22 (0.05, 0.39)        | 0.09 |
| Zimbabwe                                            | SHINE (HIV-) (47) | 892              | 880  | 0.11 (0.00, 0.21)        | 0.14 |
| Zimbabwe                                            | SHINE (HIV+) (48) | 147              | 146  | 0.27 (-0.01, 0.55)       | 0.05 |
| <b>I<sup>2</sup> = 0.59, Tau<sup>2</sup> = 0.00</b> |                   | <b>8139 8453</b> |      | <b>0.15 (0.09, 0.22)</b> |      |

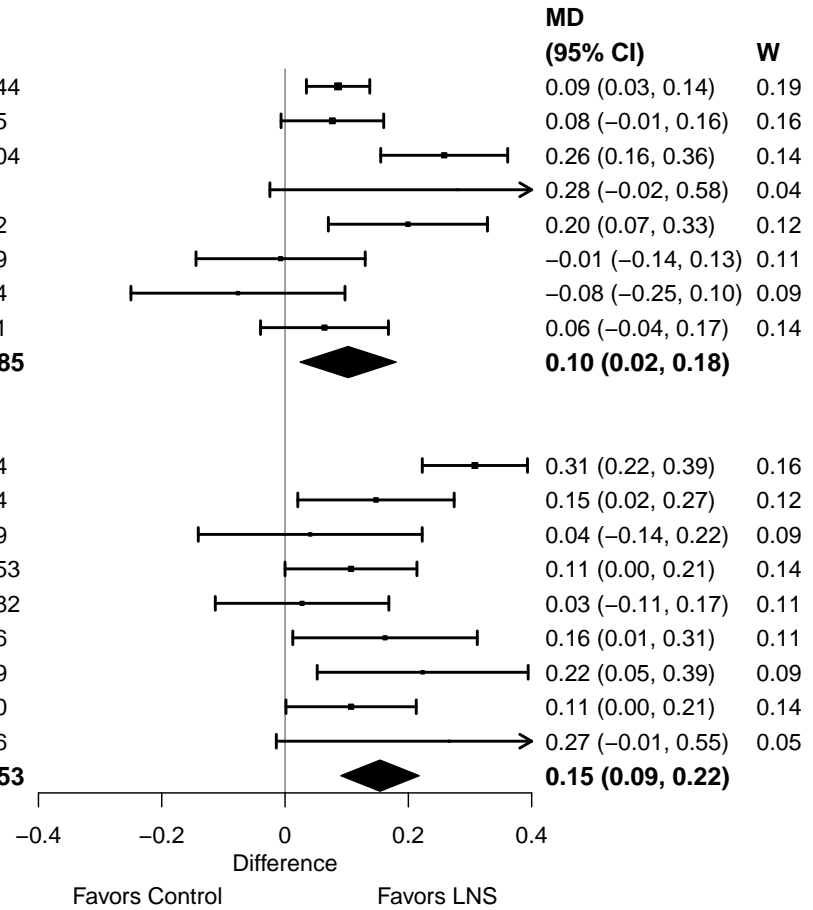



Supplemental figure 4A: Mean difference in LAZ

4A5: Stratified by Sanitation

**Sanitation**  
(p-diff = 0.694)

**Sanitation – Improved**

| Country                                             | Trial            | N           | N           |
|-----------------------------------------------------|------------------|-------------|-------------|
| Bangladesh                                          | JiVitA-4 (34)    | 2838        | 1244        |
| Bangladesh                                          | RDNS (35)        | 1663        | 815         |
| Bangladesh                                          | WASH-B (36)      | 567         | 1104        |
| Burkina Faso                                        | PROMIS (38)      | 863         | 914         |
| Burkina Faso                                        | PROMIS CS (38)   | 430         | 439         |
| Ghana                                               | GHANA (39)       | 98          | 96          |
| Ghana                                               | iLiNS-DYADG (40) | 347         | 692         |
| Haiti                                               | HAITI (41)       | 149         | 149         |
| Mali                                                | PROMIS (46)      | 506         | 506         |
| Mali                                                | PROMIS CS (46)   | 952         | 969         |
| <b>I<sup>2</sup> = 0.50, Tau<sup>2</sup> = 0.00</b> |                  | <b>8413</b> | <b>6928</b> |

**Sanitation – Unimproved**

|                                                     |                   |             |             |
|-----------------------------------------------------|-------------------|-------------|-------------|
| Burkina Faso                                        | iLiNS-Zinc (37)   | 1952        | 664         |
| Kenya                                               | WASH-B (42)       | 695         | 2253        |
| Madagascar                                          | MAHAY (43)        | 1702        | 1682        |
| Malawi                                              | iLiNS-DYADM (44)  | 220         | 444         |
| Malawi                                              | iLiNS-DOSE (45)   | 696         | 241         |
| Zimbabwe                                            | SHINE (HIV-) (47) | 892         | 880         |
| Zimbabwe                                            | SHINE (HIV+) (48) | 147         | 146         |
| <b>I<sup>2</sup> = 0.78, Tau<sup>2</sup> = 0.01</b> |                   | <b>6304</b> | <b>6310</b> |

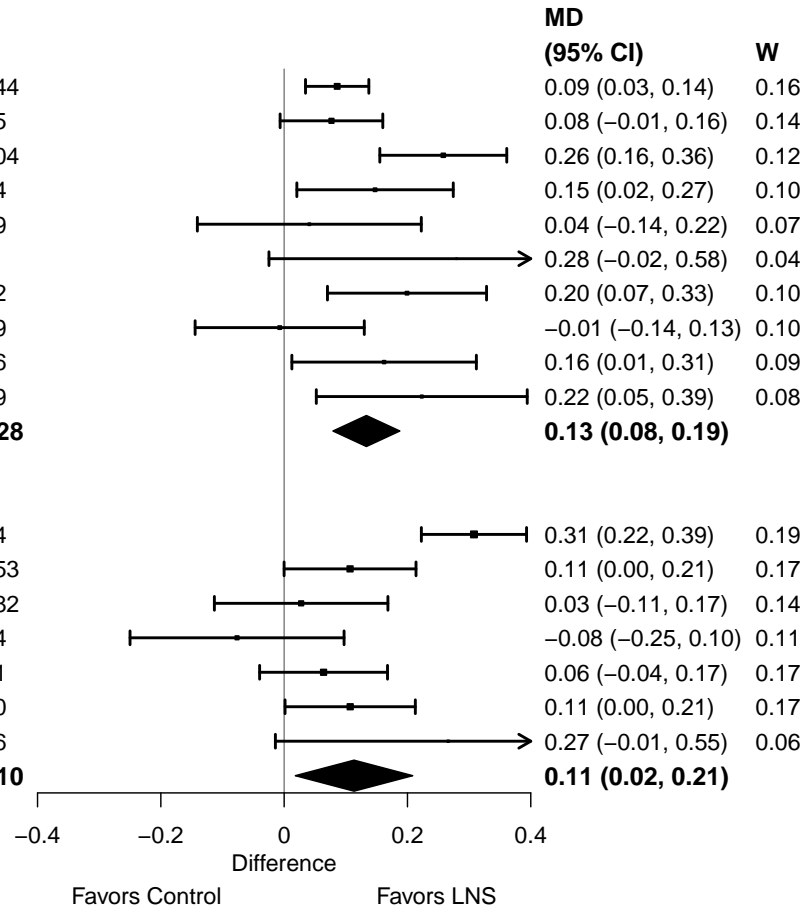

Supplemental figure 4A: Mean difference in LAZ

4A6: Stratified by Supplement duration

**Supplement duration**  
(p-diff = 0.461)

**Supplement duration – 12m or less**

| Country      | Trial             | N            | N           |
|--------------|-------------------|--------------|-------------|
| Bangladesh   | JiVitA-4 (34)     | 2838         | 1244        |
| Burkina Faso | iLiNS-Zinc (37)   | 1952         | 664         |
| Burkina Faso | PROMIS (38)       | 863          | 914         |
| Burkina Faso | PROMIS CS (38)    | 430          | 439         |
| Ghana        | GHANA (39)        | 98           | 96          |
| Ghana        | iLiNS-DYADG (40)  | 347          | 692         |
| Haiti        | HAITI (41)        | 149          | 149         |
| Madagascar   | MAHAY (43)        | 1702         | 1682        |
| Malawi       | iLiNS-DYADM (44)  | 220          | 444         |
| Malawi       | iLiNS-DOSE (45)   | 696          | 241         |
| Zimbabwe     | SHINE (HIV-) (47) | 1880         | 1794        |
| Zimbabwe     | SHINE (HIV+) (48) | 337          | 330         |
|              |                   | <b>11512</b> | <b>8689</b> |

**I<sup>2</sup> = 0.71, Tau<sup>2</sup> = 0.01**

**Supplement duration – > 12m**

|            |                |             |              |
|------------|----------------|-------------|--------------|
| Bangladesh | RDNS (35)      | 1663        | 815          |
| Bangladesh | WASH-B (36)    | 1158        | 3431         |
| Kenya      | WASH-B (42)    | 1457        | 5137         |
| Mali       | PROMIS (46)    | 506         | 506          |
| Mali       | PROMIS CS (46) | 952         | 969          |
|            |                | <b>5736</b> | <b>10858</b> |

**I<sup>2</sup> = 0.37, Tau<sup>2</sup> = 0.00**

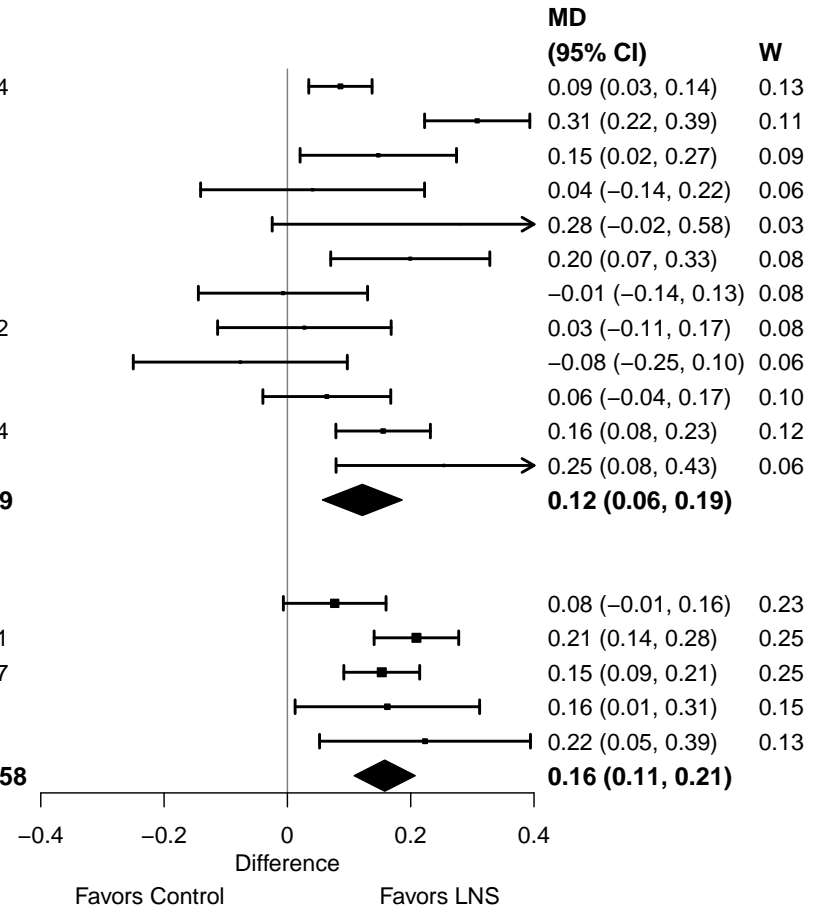

Supplemental figure 4A: Mean difference in LAZ

4A7: Stratified by Frequency of contact

**Frequency of contact**  
(p-diff = 0.527)

**Frequency of contact – Monthly**

| Country                                             | Trial             | N           | N            | MD (95% CI)              | W    |
|-----------------------------------------------------|-------------------|-------------|--------------|--------------------------|------|
| Bangladesh                                          | RDNS (35)         | 1663        | 815          | 0.08 (-0.01, 0.16)       | 0.13 |
| Burkina Faso                                        | PROMIS (38)       | 863         | 914          | 0.15 (0.02, 0.27)        | 0.10 |
| Burkina Faso                                        | PROMIS CS (38)    | 430         | 439          | 0.04 (-0.14, 0.22)       | 0.07 |
| Haiti                                               | HAITI (41)        | 149         | 149          | -0.01 (-0.14, 0.13)      | 0.09 |
| Kenya                                               | WASH-B (42)       | 1457        | 5137         | 0.15 (0.09, 0.21)        | 0.15 |
| Madagascar                                          | MAHAY (43)        | 1702        | 1682         | 0.03 (-0.11, 0.17)       | 0.09 |
| Mali                                                | PROMIS (46)       | 506         | 506          | 0.16 (0.01, 0.31)        | 0.09 |
| Mali                                                | PROMIS CS (46)    | 952         | 969          | 0.22 (0.05, 0.39)        | 0.07 |
| Zimbabwe                                            | SHINE (HIV-) (47) | 1880        | 1794         | 0.16 (0.08, 0.23)        | 0.14 |
| Zimbabwe                                            | SHINE (HIV+) (48) | 337         | 330          | 0.25 (0.08, 0.43)        | 0.07 |
| <b>I<sup>2</sup> = 0.29, Tau<sup>2</sup> = 0.00</b> |                   | <b>9939</b> | <b>12735</b> | <b>0.12 (0.08, 0.17)</b> |      |

**Frequency of contact – Weekly**

|                                                     |                  |             |             |                          |      |
|-----------------------------------------------------|------------------|-------------|-------------|--------------------------|------|
| Bangladesh                                          | JiVitA-4 (34)    | 2838        | 1244        | 0.09 (0.03, 0.14)        | 0.21 |
| Bangladesh                                          | WASH-B (36)      | 1158        | 3431        | 0.21 (0.14, 0.28)        | 0.19 |
| Burkina Faso                                        | iLiNS-Zinc (37)  | 1952        | 664         | 0.31 (0.22, 0.39)        | 0.17 |
| Ghana                                               | GHANA (39)       | 98          | 96          | 0.28 (-0.02, 0.58)       | 0.04 |
| Ghana                                               | iLiNS-DYADG (40) | 347         | 692         | 0.20 (0.07, 0.33)        | 0.13 |
| Malawi                                              | iLiNS-DYADM (44) | 220         | 444         | -0.08 (-0.25, 0.10)      | 0.10 |
| Malawi                                              | iLiNS-DOSE (45)  | 696         | 241         | 0.06 (-0.04, 0.17)       | 0.16 |
| <b>I<sup>2</sup> = 0.81, Tau<sup>2</sup> = 0.01</b> |                  | <b>7309</b> | <b>6812</b> | <b>0.15 (0.06, 0.25)</b> |      |

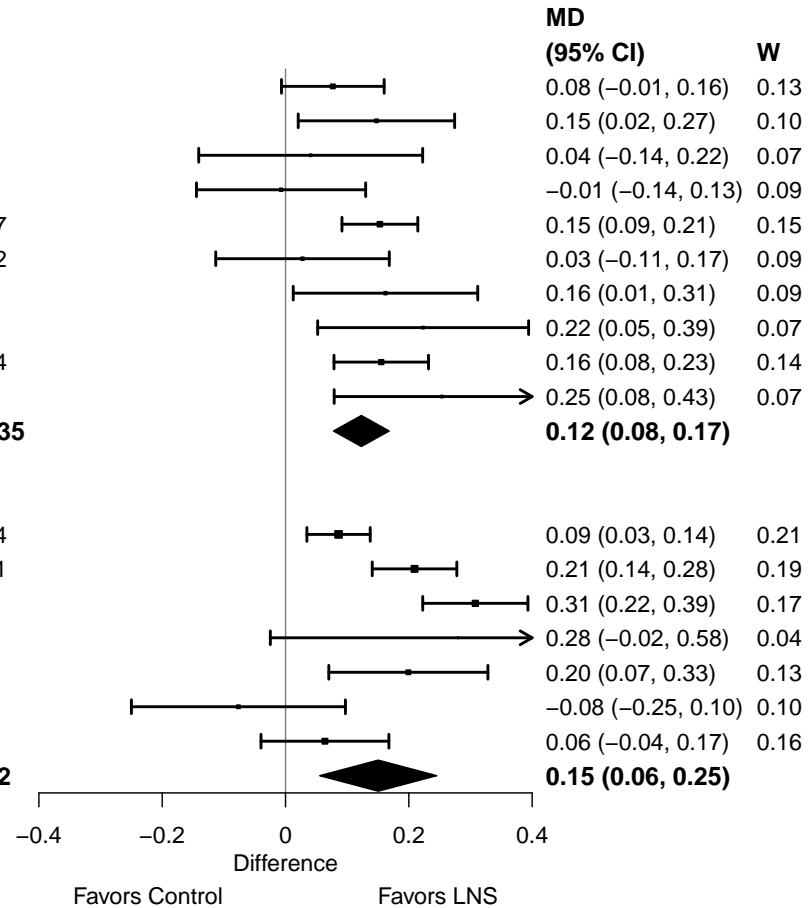

Supplemental figure 4A: Mean difference in LAZ

4A8: Stratified by Average SQ-LNS compliance

**Average SQ-LNS compliance**  
(p-diff = 0.724)

**Average SQ-LNS compliance – Low**

| Country      | Trial             | N           | N           |
|--------------|-------------------|-------------|-------------|
| Burkina Faso | PROMIS (38)       | 863         | 914         |
| Burkina Faso | PROMIS CS (38)    | 430         | 439         |
| Ghana        | iLiNS-DYADG (40)  | 347         | 692         |
| Malawi       | iLiNS-DYADM (44)  | 220         | 444         |
| Malawi       | iLiNS-DOSE (45)   | 696         | 241         |
| Mali         | PROMIS (46)       | 506         | 506         |
| Mali         | PROMIS CS (46)    | 952         | 969         |
| Zimbabwe     | SHINE (HIV-) (47) | 1880        | 1794        |
| Zimbabwe     | SHINE (HIV+) (48) | 337         | 330         |
|              |                   | <b>6231</b> | <b>6329</b> |

**I<sup>2</sup> = 0.37, Tau<sup>2</sup> = 0.00**

**Average SQ-LNS compliance – High**

|              |                 |             |              |
|--------------|-----------------|-------------|--------------|
| Bangladesh   | JiVitA-4 (34)   | 2838        | 1244         |
| Bangladesh   | RDNS (35)       | 1663        | 815          |
| Bangladesh   | WASH-B (36)     | 1158        | 3431         |
| Burkina Faso | iLiNS-Zinc (37) | 1952        | 664          |
| Ghana        | GHANA (39)      | 98          | 96           |
| Haiti        | HAITI (41)      | 149         | 149          |
| Kenya        | WASH-B (42)     | 1457        | 5137         |
|              |                 | <b>9315</b> | <b>11536</b> |

**I<sup>2</sup> = 0.80, Tau<sup>2</sup> = 0.01**

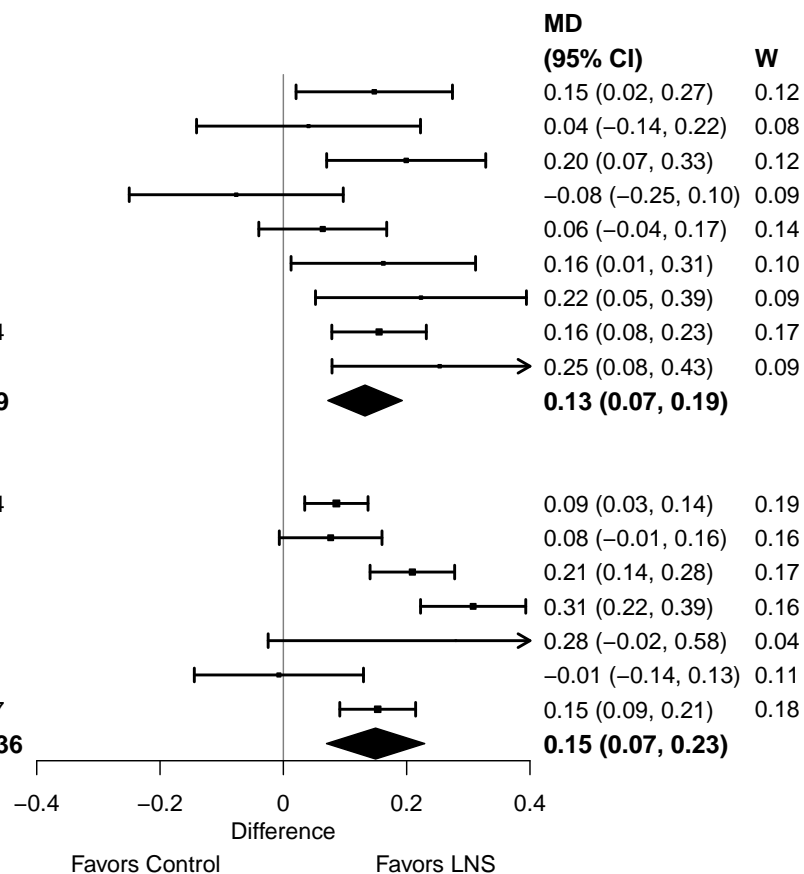

## Supplemental figure 4B: Stunting prevalence ratio

### 4B1: Stratified by Geographic region

#### Geographic region

(p-diff = 0.646)

#### Geographic region – SEAR

| Country                                             | Trial         | N           | N           | PR<br>(95% CI)           | W    |
|-----------------------------------------------------|---------------|-------------|-------------|--------------------------|------|
| Bangladesh                                          | JiVitA-4 (34) | 2838        | 1244        | 0.92 (0.84, 1.01)        | 0.32 |
| Bangladesh                                          | RDNS (35)     | 1663        | 815         | 0.92 (0.85, 1.00)        | 0.34 |
| Bangladesh                                          | WASH-B (36)   | 1158        | 3431        | 0.84 (0.77, 0.91)        | 0.34 |
| <b>I<sup>2</sup> = 0.36, Tau<sup>2</sup> = 0.00</b> |               | <b>5659</b> | <b>5490</b> | <b>0.89 (0.84, 0.95)</b> |      |

#### Geographic region – AFR

|                                                     |                   |              |              |                          |      |
|-----------------------------------------------------|-------------------|--------------|--------------|--------------------------|------|
| Burkina Faso                                        | iLiNS-Zinc (37)   | 1952         | 664          | 0.75 (0.65, 0.87)        | 0.09 |
| Burkina Faso                                        | PROMIS (38)       | 863          | 914          | 0.82 (0.67, 1.00)        | 0.07 |
| Burkina Faso                                        | PROMIS CS (38)    | 430          | 439          | 0.87 (0.63, 1.19)        | 0.03 |
| Ghana                                               | GHANA (39)        | 98           | 96           | 0.70 (0.23, 2.13)        | 0.00 |
| Ghana                                               | iLiNS-DYADG (40)  | 347          | 692          | 0.66 (0.45, 0.98)        | 0.02 |
| Kenya                                               | WASH-B (42)       | 1457         | 5137         | 0.86 (0.78, 0.94)        | 0.14 |
| Madagascar                                          | MAHAY (43)        | 1702         | 1682         | 0.98 (0.90, 1.07)        | 0.14 |
| Malawi                                              | iLiNS-DYADM (44)  | 220          | 444          | 1.10 (0.89, 1.36)        | 0.06 |
| Malawi                                              | iLiNS-DOSE (45)   | 696          | 241          | 1.00 (0.87, 1.15)        | 0.10 |
| Mali                                                | PROMIS (46)       | 506          | 506          | 0.92 (0.76, 1.10)        | 0.07 |
| Mali                                                | PROMIS CS (46)    | 952          | 969          | 0.78 (0.65, 0.95)        | 0.07 |
| Zimbabwe                                            | SHINE (HIV-) (47) | 1880         | 1794         | 0.79 (0.72, 0.87)        | 0.13 |
| Zimbabwe                                            | SHINE (HIV+) (48) | 337          | 330          | 0.81 (0.68, 0.96)        | 0.08 |
| <b>I<sup>2</sup> = 0.57, Tau<sup>2</sup> = 0.01</b> |                   | <b>11440</b> | <b>13908</b> | <b>0.87 (0.81, 0.93)</b> |      |

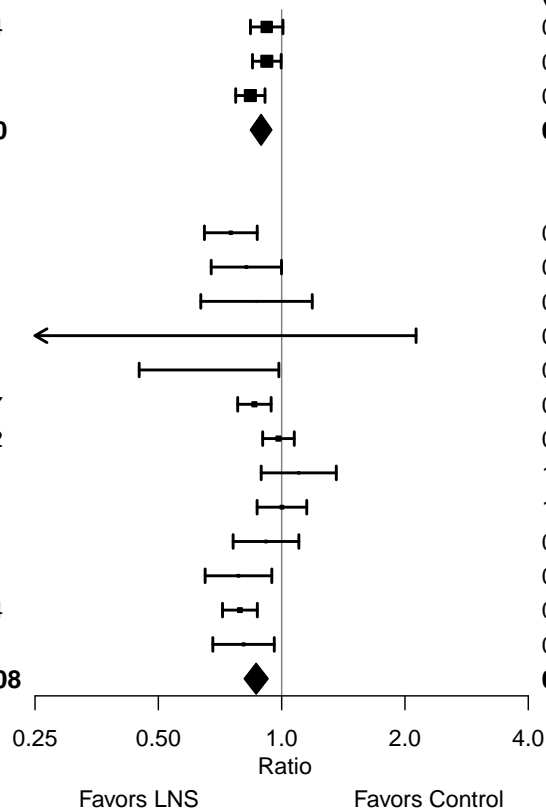

Supplemental figure 4B: Stunting prevalence ratio

4B2: Stratified by Stunting burden

**Stunting burden**

(p-diff = 0.912)

**Stunting burden – Less than 35%**

| Country                                             | Trial            | N           | N           |
|-----------------------------------------------------|------------------|-------------|-------------|
| Burkina Faso                                        | PROMIS (38)      | 863         | 914         |
| Burkina Faso                                        | PROMIS CS (38)   | 430         | 439         |
| Ghana                                               | GHANA (39)       | 98          | 96          |
| Ghana                                               | iLiNS-DYADG (40) | 347         | 692         |
| Haiti                                               | HAITI (41)       | 149         | 149         |
| Kenya                                               | WASH-B (42)      | 1457        | 5137        |
| Malawi                                              | iLiNS-DYADM (44) | 220         | 444         |
| <b>I<sup>2</sup> = 0.21, Tau<sup>2</sup> = 0.00</b> |                  | <b>3564</b> | <b>7871</b> |

**PR**

| (95% CI)                 | W    |
|--------------------------|------|
| 0.82 (0.67, 1.00)        | 0.20 |
| 0.87 (0.63, 1.19)        | 0.10 |
| 0.70 (0.23, 2.13)        | 0.01 |
| 0.66 (0.45, 0.98)        | 0.06 |
| 1.04 (0.60, 1.81)        | 0.03 |
| 0.86 (0.78, 0.94)        | 0.42 |
| 1.10 (0.89, 1.36)        | 0.18 |
| <b>0.88 (0.79, 0.97)</b> |      |

**Stunting burden – More than 35%**

|                                                     |                   |              |              |
|-----------------------------------------------------|-------------------|--------------|--------------|
| Bangladesh                                          | JiVitA-4 (34)     | 2838         | 1244         |
| Bangladesh                                          | RDNS (35)         | 1663         | 815          |
| Bangladesh                                          | WASH-B (36)       | 1158         | 3431         |
| Burkina Faso                                        | iLiNS-Zinc (37)   | 1952         | 664          |
| Madagascar                                          | MAHAY (43)        | 1702         | 1682         |
| Malawi                                              | iLiNS-DOSE (45)   | 696          | 241          |
| Mali                                                | PROMIS (46)       | 506          | 506          |
| Mali                                                | PROMIS CS (46)    | 952          | 969          |
| Zimbabwe                                            | SHINE (HIV-) (47) | 1880         | 1794         |
| Zimbabwe                                            | SHINE (HIV+) (48) | 337          | 330          |
| <b>I<sup>2</sup> = 0.63, Tau<sup>2</sup> = 0.01</b> |                   | <b>13684</b> | <b>11676</b> |

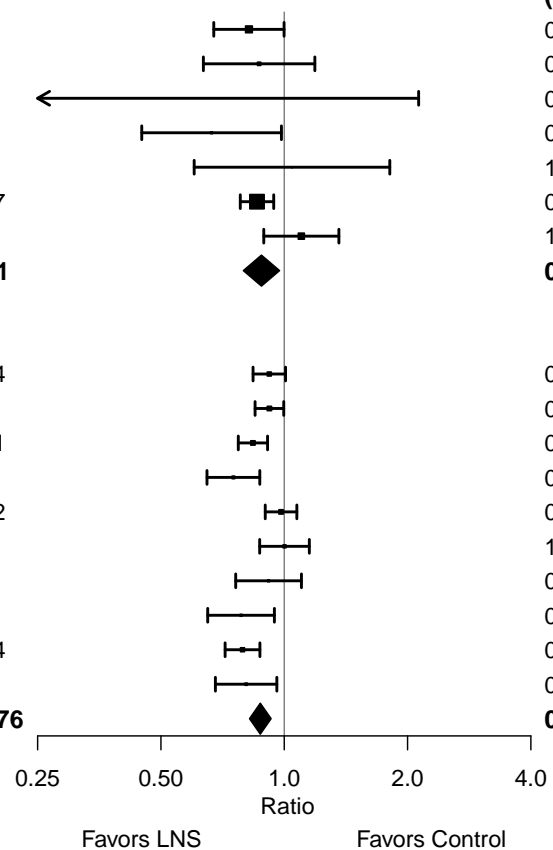

Supplemental figure 4B: Stunting prevalence ratio

4B3: Stratified by Malaria prevalence

**Malaria prevalence**

(p-diff = 0.862)

**Malaria prevalence – Less than 10%**

| Country    | Trial             | N            | N            |
|------------|-------------------|--------------|--------------|
| Bangladesh | JiVitA-4 (34)     | 2838         | 1244         |
| Bangladesh | RDNS (35)         | 1663         | 815          |
| Bangladesh | WASH-B (36)       | 1158         | 3431         |
| Haiti      | HAITI (41)        | 149          | 149          |
| Kenya      | WASH-B (42)       | 1457         | 5137         |
| Madagascar | MAHAY (43)        | 1702         | 1682         |
| Zimbabwe   | SHINE (HIV-) (47) | 1880         | 1794         |
| Zimbabwe   | SHINE (HIV+) (48) | 337          | 330          |
|            |                   | <b>11184</b> | <b>14582</b> |

**I<sup>2</sup> = 0.55, Tau<sup>2</sup> = 0.00**

**Malaria prevalence – At least 10%**

|              |                  |             |             |
|--------------|------------------|-------------|-------------|
| Burkina Faso | iLiNS-Zinc (37)  | 1952        | 664         |
| Burkina Faso | PROMIS (38)      | 863         | 914         |
| Burkina Faso | PROMIS CS (38)   | 430         | 439         |
| Ghana        | GHANA (39)       | 98          | 96          |
| Ghana        | iLiNS-DYADG (40) | 347         | 692         |
| Malawi       | iLiNS-DYADM (44) | 220         | 444         |
| Malawi       | iLiNS-DOSE (45)  | 696         | 241         |
| Mali         | PROMIS (46)      | 506         | 506         |
| Mali         | PROMIS CS (46)   | 952         | 969         |
|              |                  | <b>6064</b> | <b>4965</b> |

**I<sup>2</sup> = 0.51, Tau<sup>2</sup> = 0.01**

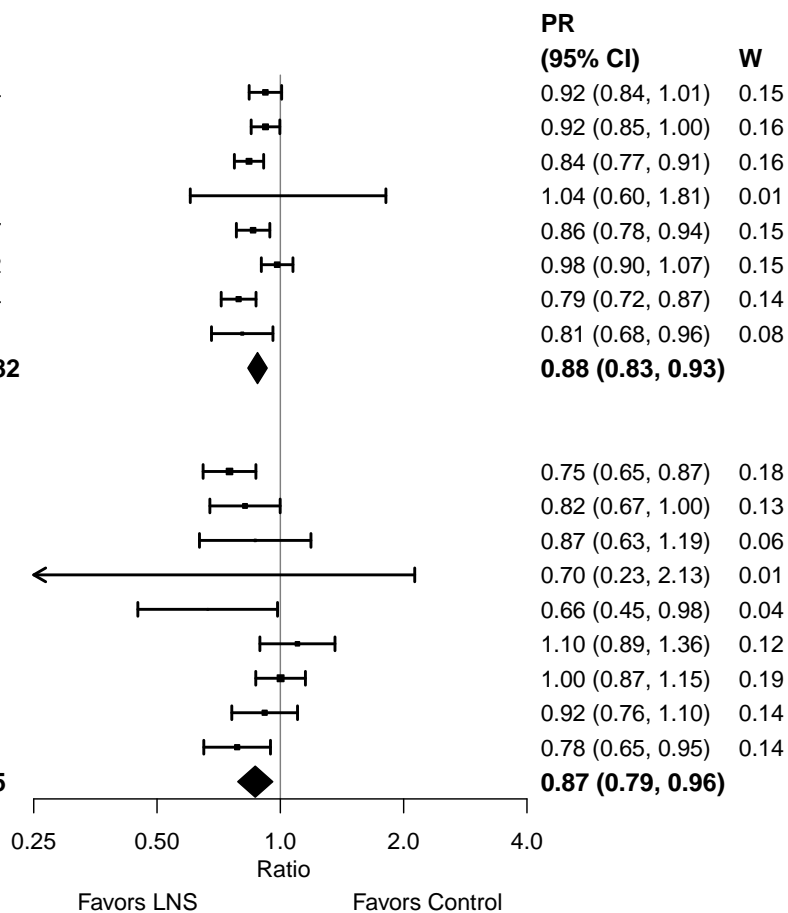

Supplemental figure 4B: Stunting prevalence ratio

4B4: Stratified by Source water quality

Source water quality

(p-diff = 0.267)

Source water quality – Improved

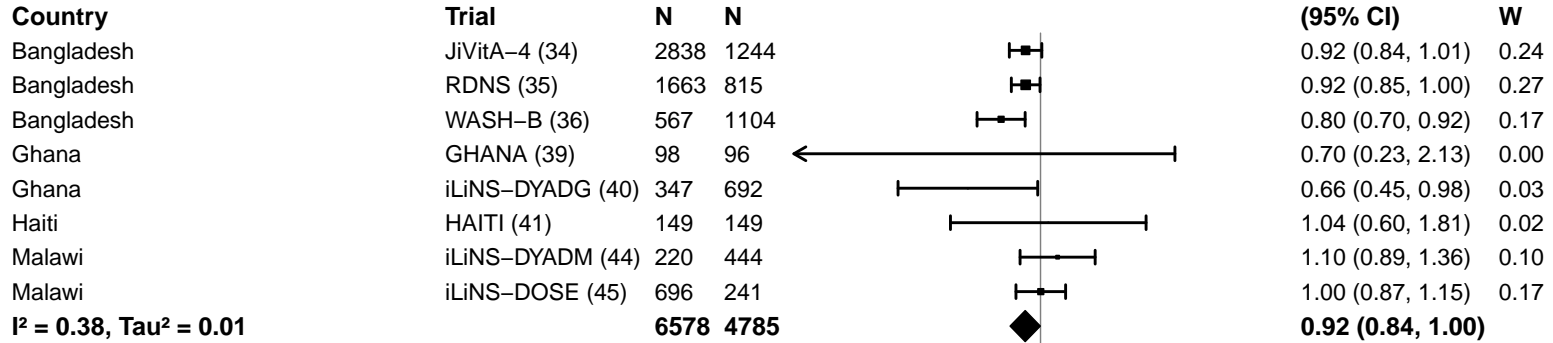

Source water quality – Unimproved

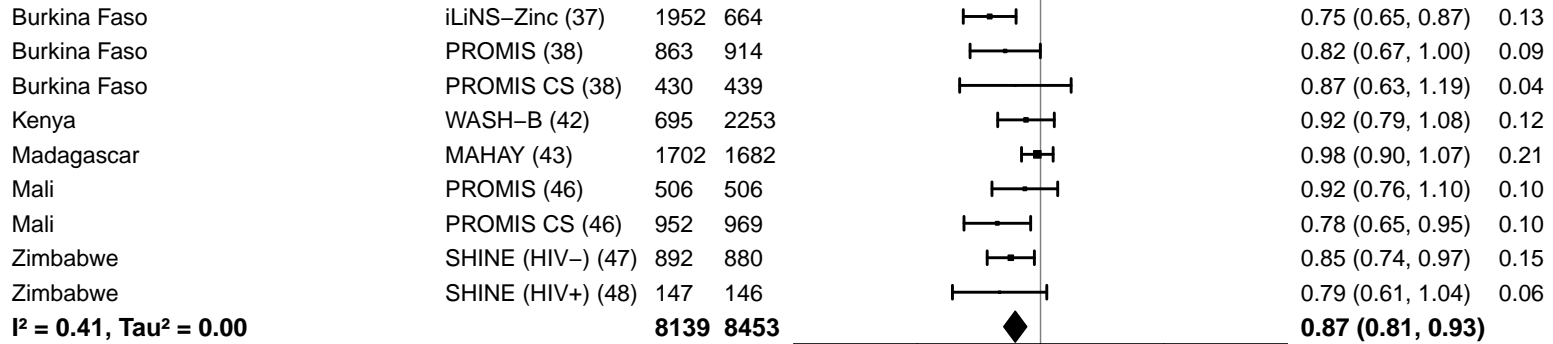



Supplemental figure 4B: Stunting prevalence ratio

4B5: Stratified by Sanitation

**Sanitation**  
(p-diff = 0.328)

**Sanitation – Improved**

| Country                                             | Trial            | N           | N           | PR<br>(95% CI)           | W    |
|-----------------------------------------------------|------------------|-------------|-------------|--------------------------|------|
| Bangladesh                                          | JiVitA-4 (34)    | 2838        | 1244        | 0.92 (0.84, 1.01)        | 0.22 |
| Bangladesh                                          | RDNS (35)        | 1663        | 815         | 0.92 (0.85, 1.00)        | 0.24 |
| Bangladesh                                          | WASH-B (36)      | 567         | 1104        | 0.80 (0.70, 0.92)        | 0.15 |
| Burkina Faso                                        | PROMIS (38)      | 863         | 914         | 0.82 (0.67, 1.00)        | 0.09 |
| Burkina Faso                                        | PROMIS CS (38)   | 430         | 439         | 0.87 (0.63, 1.19)        | 0.04 |
| Ghana                                               | GHANA (39)       | 98          | 96          | 0.70 (0.23, 2.13)        | 0.00 |
| Ghana                                               | iLiNS-DYADG (40) | 347         | 692         | 0.66 (0.45, 0.98)        | 0.03 |
| Haiti                                               | HAITI (41)       | 149         | 149         | 1.04 (0.60, 1.81)        | 0.02 |
| Mali                                                | PROMIS (46)      | 506         | 506         | 0.92 (0.76, 1.10)        | 0.10 |
| Mali                                                | PROMIS CS (46)   | 952         | 969         | 0.78 (0.65, 0.95)        | 0.10 |
| <b>I<sup>2</sup> = 0.00, Tau<sup>2</sup> = 0.00</b> |                  | <b>8413</b> | <b>6928</b> | <b>0.88 (0.84, 0.93)</b> |      |

**Sanitation – Unimproved**

|                                                     |                   |             |             |                          |      |
|-----------------------------------------------------|-------------------|-------------|-------------|--------------------------|------|
| Burkina Faso                                        | iLiNS-Zinc (37)   | 1952        | 664         | 0.75 (0.65, 0.87)        | 0.15 |
| Kenya                                               | WASH-B (42)       | 695         | 2253        | 0.92 (0.79, 1.08)        | 0.13 |
| Madagascar                                          | MAHAY (43)        | 1702        | 1682        | 0.98 (0.90, 1.07)        | 0.24 |
| Malawi                                              | iLiNS-DYADM (44)  | 220         | 444         | 1.10 (0.89, 1.36)        | 0.09 |
| Malawi                                              | iLiNS-DOSE (45)   | 696         | 241         | 1.00 (0.87, 1.15)        | 0.16 |
| Zimbabwe                                            | SHINE (HIV-) (47) | 892         | 880         | 0.85 (0.74, 0.97)        | 0.17 |
| Zimbabwe                                            | SHINE (HIV+) (48) | 147         | 146         | 0.79 (0.61, 1.04)        | 0.06 |
| <b>I<sup>2</sup> = 0.63, Tau<sup>2</sup> = 0.01</b> |                   | <b>6304</b> | <b>6310</b> | <b>0.91 (0.83, 1.00)</b> |      |

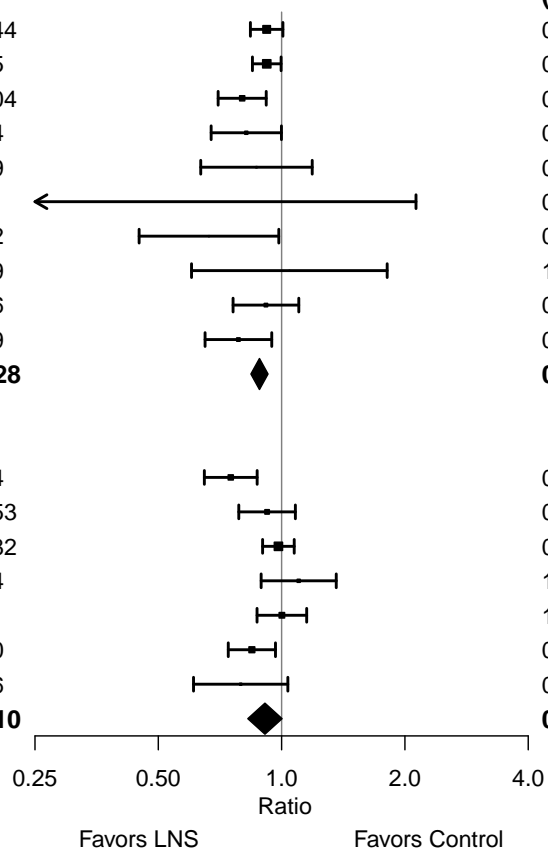

Supplemental figure 4B: Stunting prevalence ratio

4B6: Stratified by Supplement duration

**Supplement duration**

(p-diff = 0.742)

**Supplement duration – 12m or less**

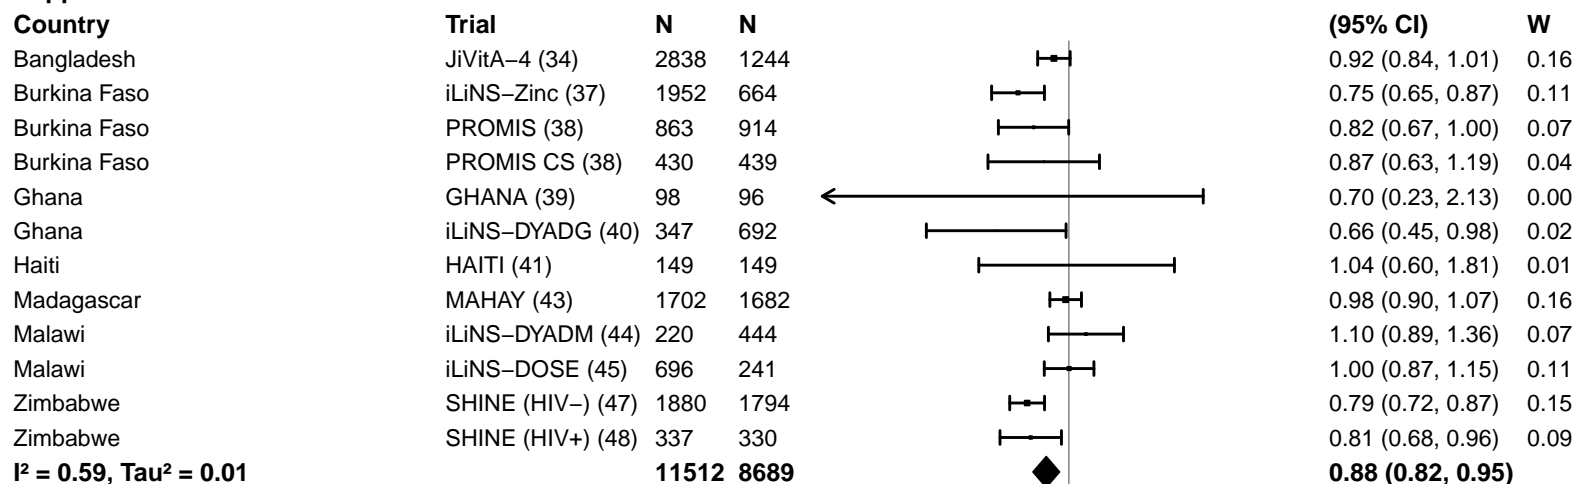

**Supplement duration – > 12m**

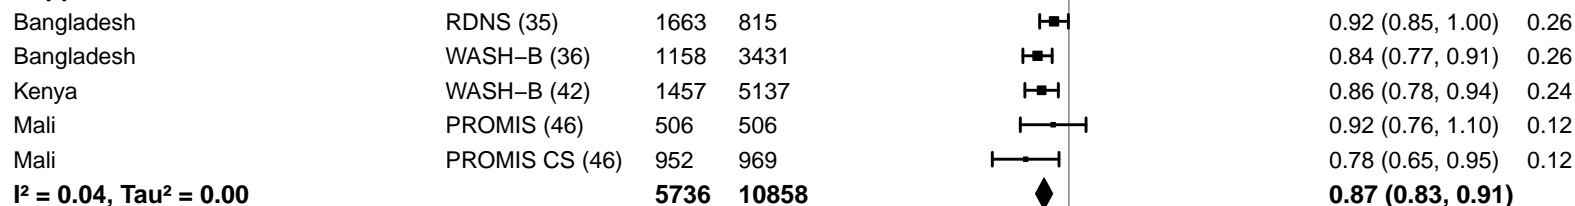

Supplemental figure 4B: Stunting prevalence ratio

4B7: Stratified by Frequency of contact

**Frequency of contact**  
( $p$ -diff = 0.734)

**Frequency of contact – Monthly**

| Country                                             | Trial             | N           | N            | PR (95% CI)              | W    |
|-----------------------------------------------------|-------------------|-------------|--------------|--------------------------|------|
| Bangladesh                                          | RDNS (35)         | 1663        | 815          | 0.92 (0.85, 1.00)        | 0.17 |
| Burkina Faso                                        | PROMIS (38)       | 863         | 914          | 0.82 (0.67, 1.00)        | 0.07 |
| Burkina Faso                                        | PROMIS CS (38)    | 430         | 439          | 0.87 (0.63, 1.19)        | 0.04 |
| Haiti                                               | HAITI (41)        | 149         | 149          | 1.04 (0.60, 1.81)        | 0.01 |
| Kenya                                               | WASH-B (42)       | 1457        | 5137         | 0.86 (0.78, 0.94)        | 0.15 |
| Madagascar                                          | MAHAY (43)        | 1702        | 1682         | 0.98 (0.90, 1.07)        | 0.16 |
| Mali                                                | PROMIS (46)       | 506         | 506          | 0.92 (0.76, 1.10)        | 0.08 |
| Mali                                                | PROMIS CS (46)    | 952         | 969          | 0.78 (0.65, 0.95)        | 0.08 |
| Zimbabwe                                            | SHINE (HIV-) (47) | 1880        | 1794         | 0.79 (0.72, 0.87)        | 0.15 |
| Zimbabwe                                            | SHINE (HIV+) (48) | 337         | 330          | 0.81 (0.68, 0.96)        | 0.09 |
| <b><math>I^2 = 0.41, \text{Tau}^2 = 0.00</math></b> |                   | <b>9939</b> | <b>12735</b> | <b>0.87 (0.83, 0.92)</b> |      |

**Frequency of contact – Weekly**

|                                                     |                  |             |             |                          |      |
|-----------------------------------------------------|------------------|-------------|-------------|--------------------------|------|
| Bangladesh                                          | JiVitA-4 (34)    | 2838        | 1244        | 0.92 (0.84, 1.01)        | 0.25 |
| Bangladesh                                          | WASH-B (36)      | 1158        | 3431        | 0.84 (0.77, 0.91)        | 0.27 |
| Burkina Faso                                        | iLiNS-Zinc (37)  | 1952        | 664         | 0.75 (0.65, 0.87)        | 0.16 |
| Ghana                                               | GHANA (39)       | 98          | 96          | 0.70 (0.23, 2.13)        | 0.01 |
| Ghana                                               | iLiNS-DYADG (40) | 347         | 692         | 0.66 (0.45, 0.98)        | 0.04 |
| Malawi                                              | iLiNS-DYADM (44) | 220         | 444         | 1.10 (0.89, 1.36)        | 0.10 |
| Malawi                                              | iLiNS-DOSE (45)  | 696         | 241         | 1.00 (0.87, 1.15)        | 0.17 |
| <b><math>I^2 = 0.63, \text{Tau}^2 = 0.01</math></b> |                  | <b>7309</b> | <b>6812</b> | <b>0.88 (0.79, 0.99)</b> |      |

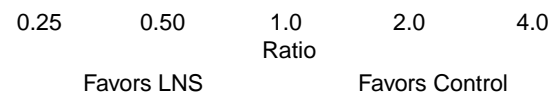

Supplemental figure 4B: Stunting prevalence ratio

4B8: Stratified by Average SQ-LNS compliance

**Average SQ-LNS compliance**  
(p-diff = 0.974)

**Average SQ-LNS compliance – Low**

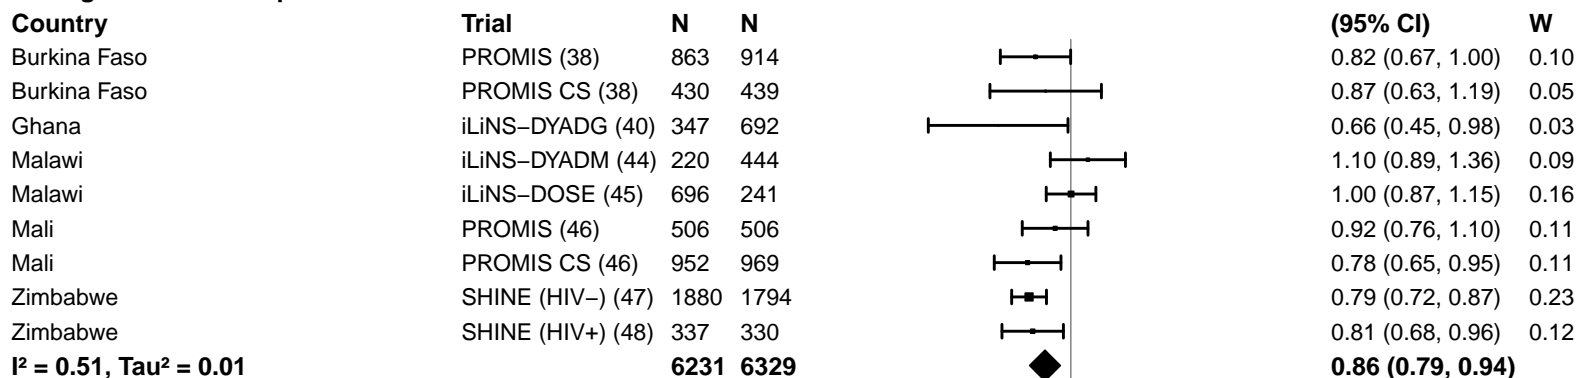

**Average SQ-LNS compliance – High**

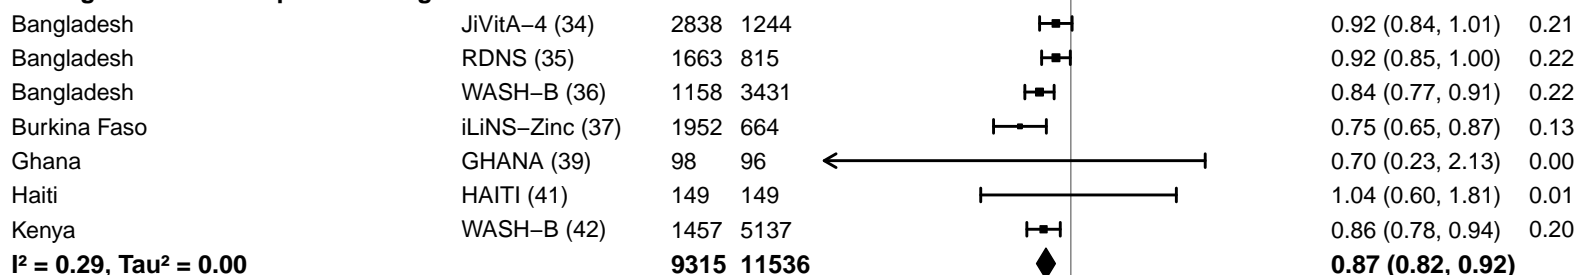

## Supplemental figure 4C: Stunting prevalence difference

### 4C1: Stratified by Geographic region

#### Geographic region

( $p$ -diff = 0.874)

#### Geographic region – SEAR

| Country    | Trial         | N           | N           |
|------------|---------------|-------------|-------------|
| Bangladesh | JiVitA-4 (34) | 2838        | 1244        |
| Bangladesh | RDNS (35)     | 1663        | 815         |
| Bangladesh | WASH-B (36)   | 1158        | 3431        |
|            |               | <b>5659</b> | <b>5490</b> |

$I^2 = 0.26$ ,  $\text{Tau}^2 = 0.00$

#### Geographic region – AFR

|              |                   |              |              |
|--------------|-------------------|--------------|--------------|
| Burkina Faso | iLiNS-Zinc (37)   | 1952         | 664          |
| Burkina Faso | PROMIS (38)       | 863          | 914          |
| Burkina Faso | PROMIS CS (38)    | 430          | 439          |
| Ghana        | GHANA (39)        | 98           | 96           |
| Ghana        | iLiNS-DYADG (40)  | 347          | 692          |
| Kenya        | WASH-B (42)       | 1457         | 5137         |
| Madagascar   | MAHAY (43)        | 1702         | 1682         |
| Malawi       | iLiNS-DYADM (44)  | 220          | 444          |
| Malawi       | iLiNS-DOSE (45)   | 696          | 241          |
| Mali         | PROMIS (46)       | 506          | 506          |
| Mali         | PROMIS CS (46)    | 952          | 969          |
| Zimbabwe     | SHINE (HIV-) (47) | 1880         | 1794         |
| Zimbabwe     | SHINE (HIV+) (48) | 337          | 330          |
|              |                   | <b>11440</b> | <b>13908</b> |

$I^2 = 0.60$ ,  $\text{Tau}^2 = 0.00$

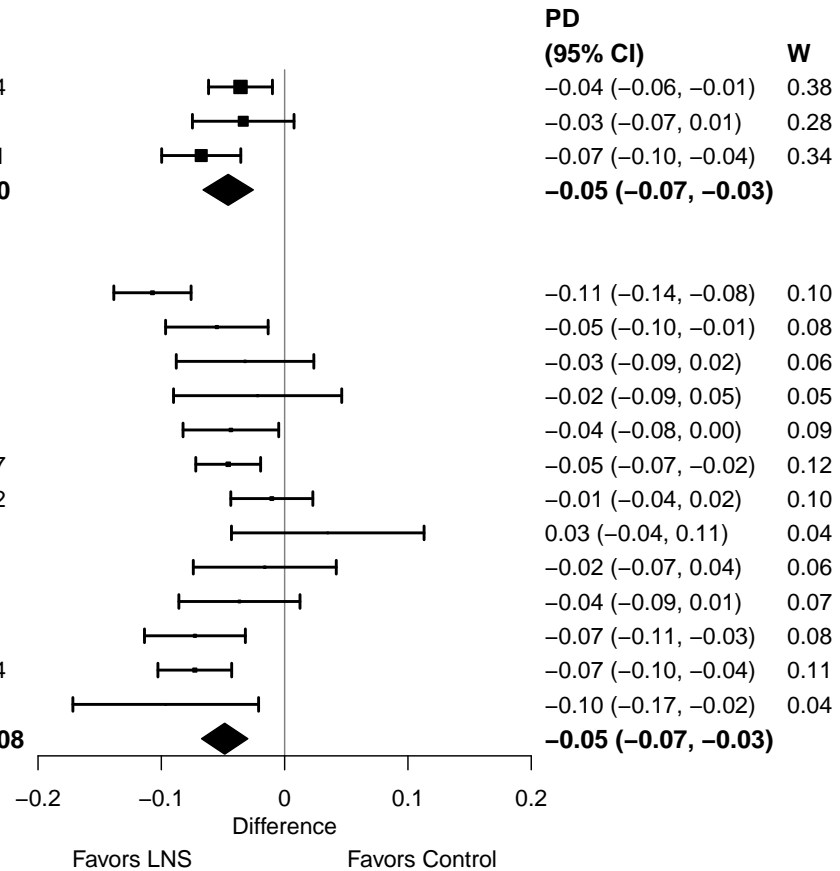

Supplemental figure 4C: Stunting prevalence difference

4C2: Stratified by Stunting burden

**Stunting burden**

(p-diff = 0.181)

**Stunting burden – Less than 35%**

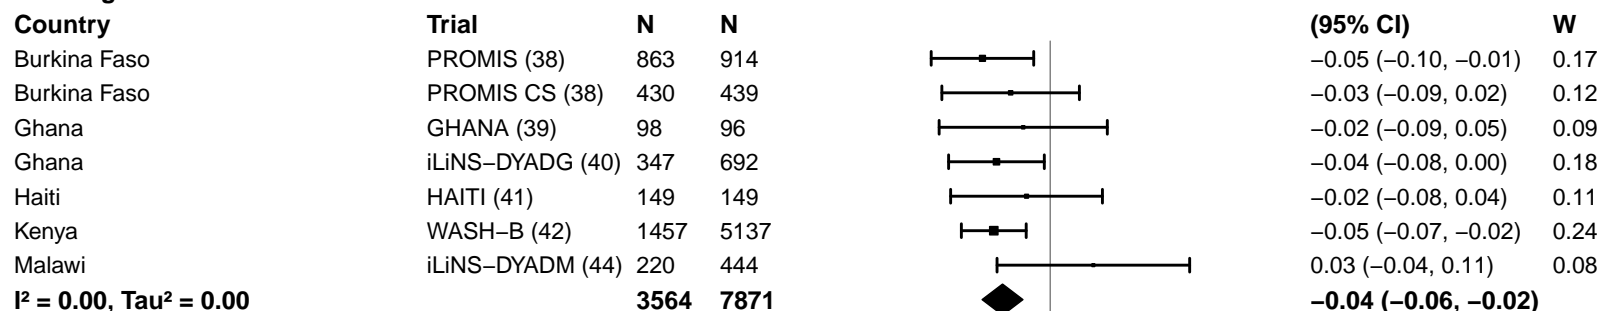

**Stunting burden – More than 35%**

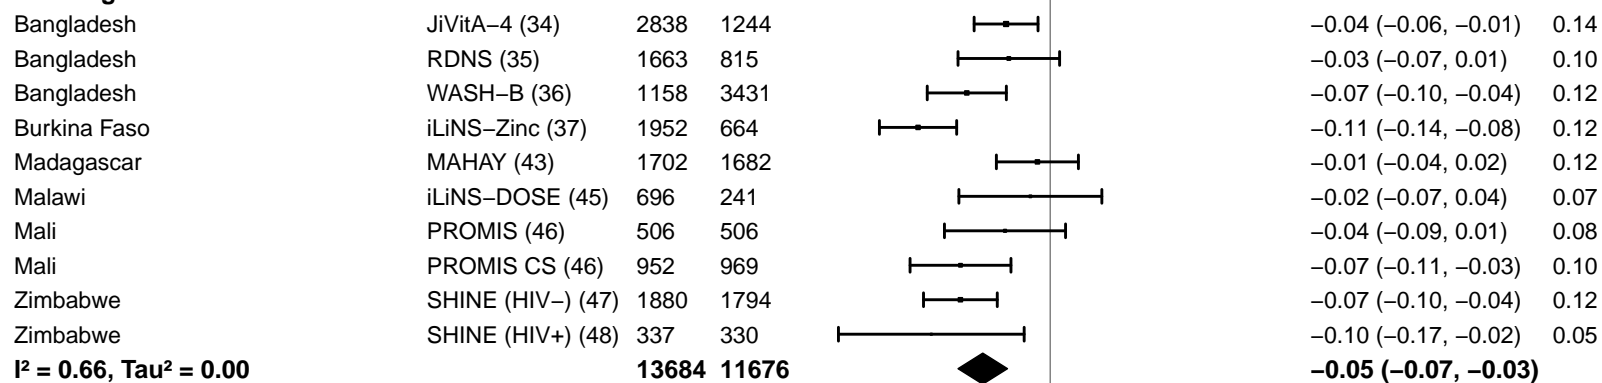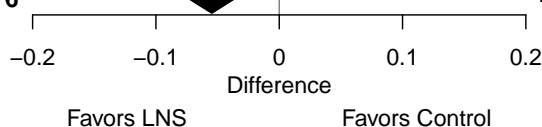

Supplemental figure 4C: Stunting prevalence difference

4C3: Stratified by Malaria prevalence

**Malaria prevalence**  
(p-diff = 0.848)

**Malaria prevalence – Less than 10%**

| Country    | Trial             | N            | N            | PD<br>(95% CI)              | W    |
|------------|-------------------|--------------|--------------|-----------------------------|------|
| Bangladesh | JiVitA-4 (34)     | 2838         | 1244         | -0.04 (-0.06, -0.01)        | 0.16 |
| Bangladesh | RDNS (35)         | 1663         | 815          | -0.03 (-0.07, 0.01)         | 0.12 |
| Bangladesh | WASH-B (36)       | 1158         | 3431         | -0.07 (-0.10, -0.04)        | 0.14 |
| Haiti      | HAITI (41)        | 149          | 149          | -0.02 (-0.08, 0.04)         | 0.07 |
| Kenya      | WASH-B (42)       | 1457         | 5137         | -0.05 (-0.07, -0.02)        | 0.16 |
| Madagascar | MAHAY (43)        | 1702         | 1682         | -0.01 (-0.04, 0.02)         | 0.14 |
| Zimbabwe   | SHINE (HIV-) (47) | 1880         | 1794         | -0.07 (-0.10, -0.04)        | 0.15 |
| Zimbabwe   | SHINE (HIV+) (48) | 337          | 330          | -0.10 (-0.17, -0.02)        | 0.05 |
|            |                   | <b>11184</b> | <b>14582</b> | <b>-0.05 (-0.06, -0.03)</b> |      |

**I<sup>2</sup> = 0.45, Tau<sup>2</sup> = 0.00**

**Malaria prevalence – At least 10%**

|              |                  |             |             |                             |      |
|--------------|------------------|-------------|-------------|-----------------------------|------|
| Burkina Faso | iLiNS-Zinc (37)  | 1952        | 664         | -0.11 (-0.14, -0.08)        | 0.17 |
| Burkina Faso | PROMIS (38)      | 863         | 914         | -0.05 (-0.10, -0.01)        | 0.13 |
| Burkina Faso | PROMIS CS (38)   | 430         | 439         | -0.03 (-0.09, 0.02)         | 0.10 |
| Ghana        | GHANA (39)       | 98          | 96          | -0.02 (-0.09, 0.05)         | 0.07 |
| Ghana        | iLiNS-DYADG (40) | 347         | 692         | -0.04 (-0.08, 0.00)         | 0.14 |
| Malawi       | iLiNS-DYADM (44) | 220         | 444         | 0.03 (-0.04, 0.11)          | 0.06 |
| Malawi       | iLiNS-DOSE (45)  | 696         | 241         | -0.02 (-0.07, 0.04)         | 0.09 |
| Mali         | PROMIS (46)      | 506         | 506         | -0.04 (-0.09, 0.01)         | 0.11 |
| Mali         | PROMIS CS (46)   | 952         | 969         | -0.07 (-0.11, -0.03)        | 0.13 |
|              |                  | <b>6064</b> | <b>4965</b> | <b>-0.05 (-0.07, -0.02)</b> |      |

**I<sup>2</sup> = 0.61, Tau<sup>2</sup> = 0.00**

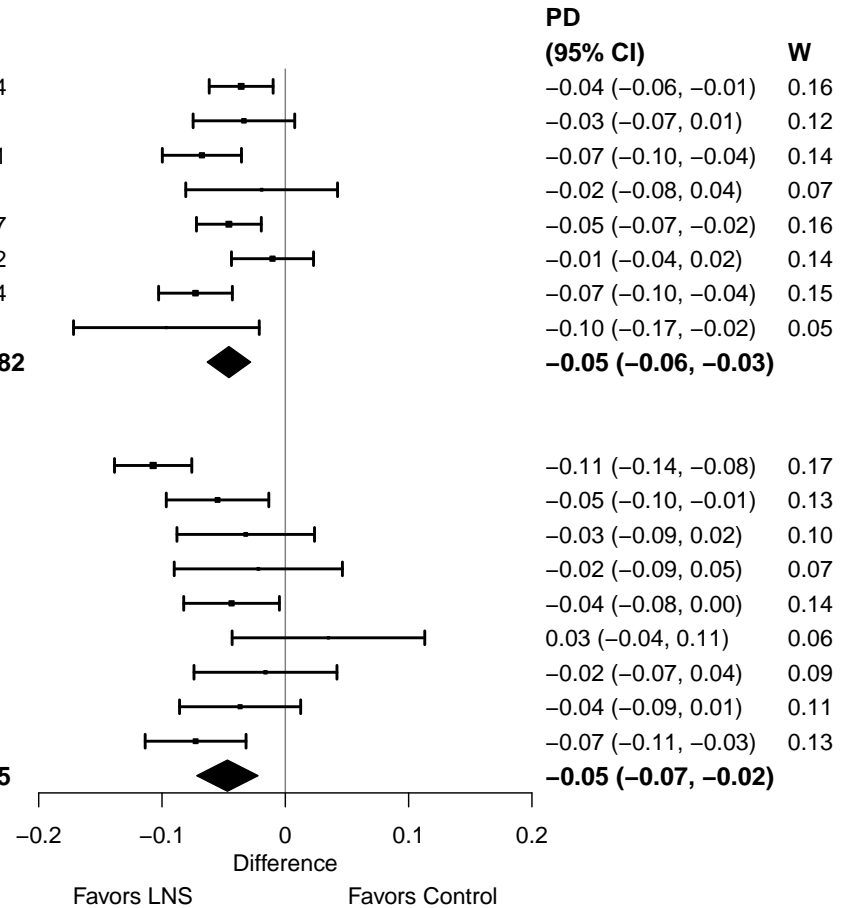

Supplemental figure 4C: Stunting prevalence difference

4C4: Stratified by Source water quality

**Source water quality**

(p-diff = 0.234)

**Source water quality – Improved**

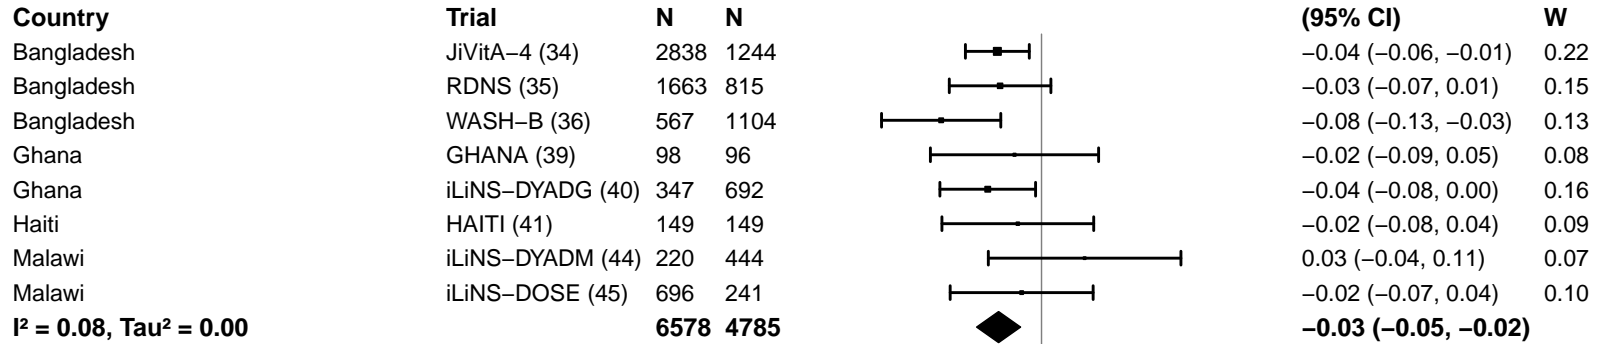

**Source water quality – Unimproved**

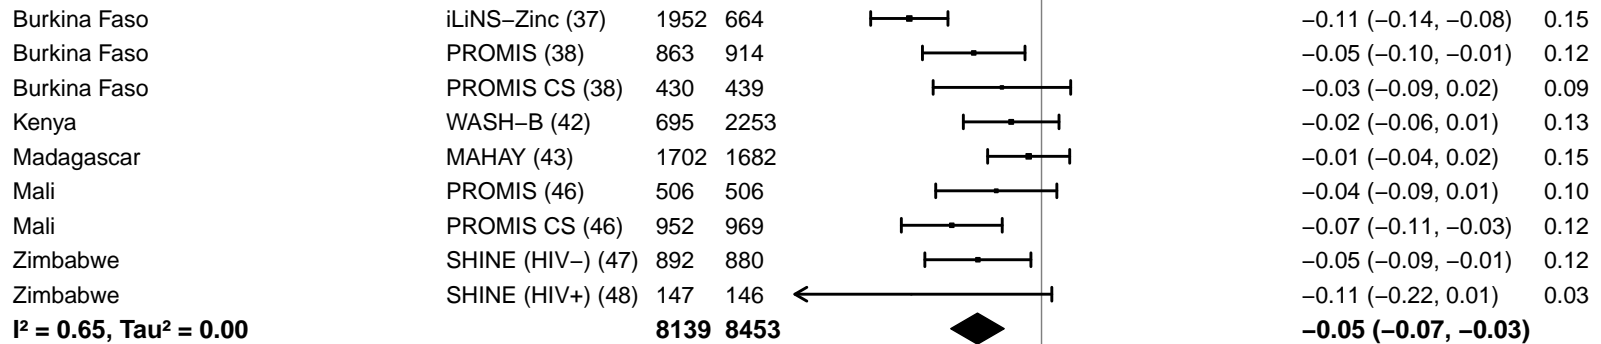

-0.2      -0.1      0      0.1      0.2  
 Difference  
 Favors LNS      Favors Control



Supplemental figure 4C: Stunting prevalence difference

4C5: Stratified by Sanitation

**Sanitation**  
(p-diff = 0.839)

**Sanitation – Improved**

| Country                                             | Trial            | N           | N           | PD (95% CI)                 | W    |
|-----------------------------------------------------|------------------|-------------|-------------|-----------------------------|------|
| Bangladesh                                          | JiVitA-4 (34)    | 2838        | 1244        | -0.04 (-0.06, -0.01)        | 0.16 |
| Bangladesh                                          | RDNS (35)        | 1663        | 815         | -0.03 (-0.07, 0.01)         | 0.11 |
| Bangladesh                                          | WASH-B (36)      | 567         | 1104        | -0.08 (-0.13, -0.03)        | 0.09 |
| Burkina Faso                                        | PROMIS (38)      | 863         | 914         | -0.05 (-0.10, -0.01)        | 0.11 |
| Burkina Faso                                        | PROMIS CS (38)   | 430         | 439         | -0.03 (-0.09, 0.02)         | 0.08 |
| Ghana                                               | GHANA (39)       | 98          | 96          | -0.02 (-0.09, 0.05)         | 0.06 |
| Ghana                                               | iLiNS-DYADG (40) | 347         | 692         | -0.04 (-0.08, 0.00)         | 0.12 |
| Haiti                                               | HAITI (41)       | 149         | 149         | -0.02 (-0.08, 0.04)         | 0.07 |
| Mali                                                | PROMIS (46)      | 506         | 506         | -0.04 (-0.09, 0.01)         | 0.09 |
| Mali                                                | PROMIS CS (46)   | 952         | 969         | -0.07 (-0.11, -0.03)        | 0.11 |
| <b>I<sup>2</sup> = 0.00, Tau<sup>2</sup> = 0.00</b> |                  | <b>8413</b> | <b>6928</b> | <b>-0.04 (-0.06, -0.03)</b> |      |

**Sanitation – Unimproved**

|                                                     |                   |             |             |                            |      |
|-----------------------------------------------------|-------------------|-------------|-------------|----------------------------|------|
| Burkina Faso                                        | iLiNS-Zinc (37)   | 1952        | 664         | -0.11 (-0.14, -0.08)       | 0.22 |
| Kenya                                               | WASH-B (42)       | 695         | 2253        | -0.02 (-0.06, 0.01)        | 0.18 |
| Madagascar                                          | MAHAY (43)        | 1702        | 1682        | -0.01 (-0.04, 0.02)        | 0.21 |
| Malawi                                              | iLiNS-DYADM (44)  | 220         | 444         | 0.03 (-0.04, 0.11)         | 0.08 |
| Malawi                                              | iLiNS-DOSE (45)   | 696         | 241         | -0.02 (-0.07, 0.04)        | 0.12 |
| Zimbabwe                                            | SHINE (HIV-) (47) | 892         | 880         | -0.05 (-0.09, -0.01)       | 0.16 |
| Zimbabwe                                            | SHINE (HIV+) (48) | 147         | 146         | -0.11 (-0.22, 0.01)        | 0.04 |
| <b>I<sup>2</sup> = 0.77, Tau<sup>2</sup> = 0.00</b> |                   | <b>6304</b> | <b>6310</b> | <b>-0.04 (-0.08, 0.00)</b> |      |

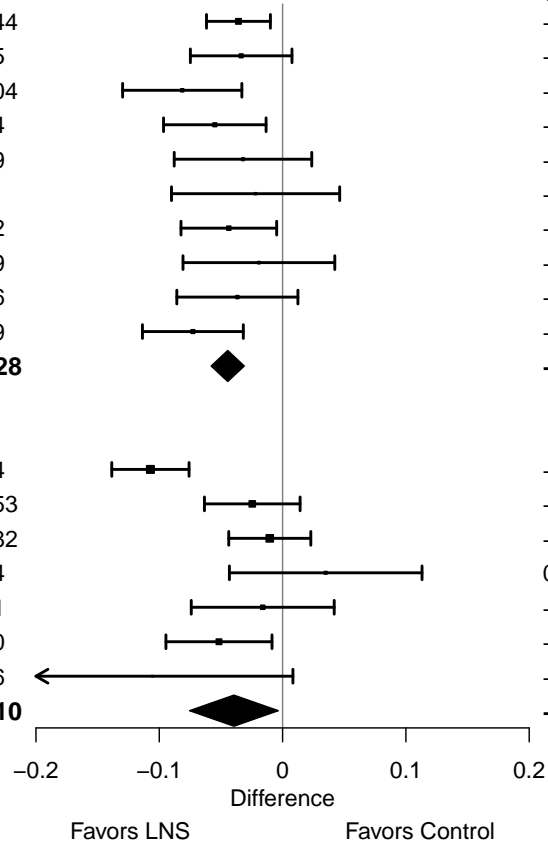

Supplemental figure 4C: Stunting prevalence difference

4C6: Stratified by Supplement duration

**Supplement duration**

(p-diff = 0.654)

**Supplement duration – 12m or less**

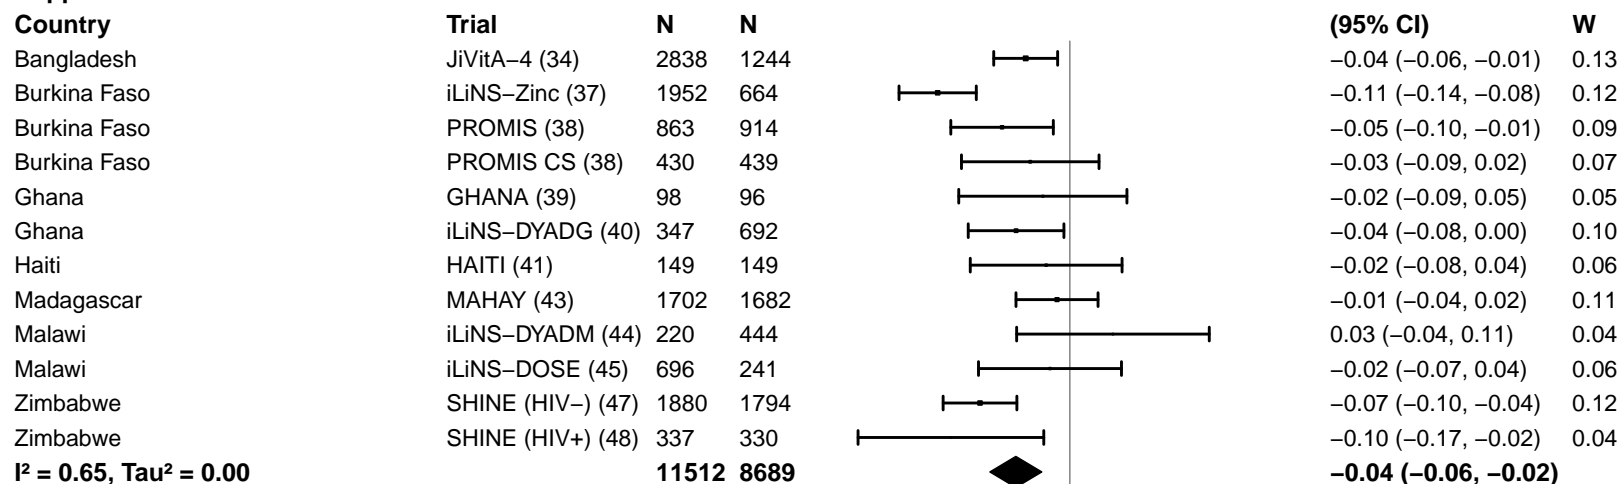

**Supplement duration – > 12m**

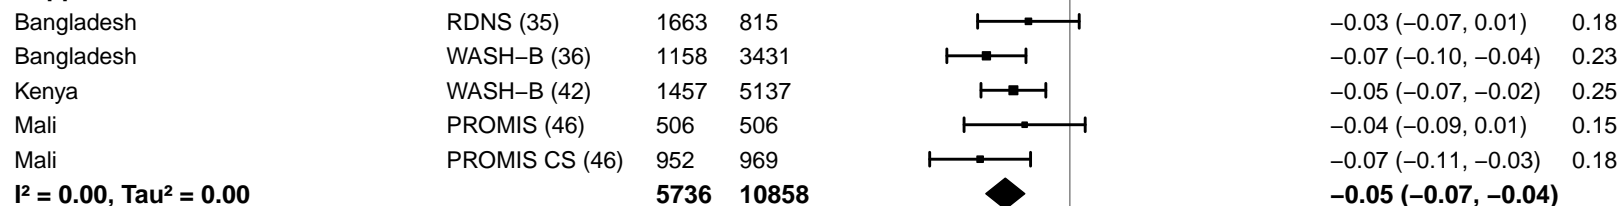

Supplemental figure 4C: Stunting prevalence difference

4C7: Stratified by Frequency of contact

**Frequency of contact**  
(p-diff = 0.910)

**Frequency of contact – Monthly**

| Country                                             | Trial             | N           | N            | PD (95% CI)                 | W    |
|-----------------------------------------------------|-------------------|-------------|--------------|-----------------------------|------|
| Bangladesh                                          | RDNS (35)         | 1663        | 815          | -0.03 (-0.07, 0.01)         | 0.10 |
| Burkina Faso                                        | PROMIS (38)       | 863         | 914          | -0.05 (-0.10, -0.01)        | 0.10 |
| Burkina Faso                                        | PROMIS CS (38)    | 430         | 439          | -0.03 (-0.09, 0.02)         | 0.08 |
| Haiti                                               | HAITI (41)        | 149         | 149          | -0.02 (-0.08, 0.04)         | 0.07 |
| Kenya                                               | WASH-B (42)       | 1457        | 5137         | -0.05 (-0.07, -0.02)        | 0.15 |
| Madagascar                                          | MAHAY (43)        | 1702        | 1682         | -0.01 (-0.04, 0.02)         | 0.13 |
| Mali                                                | PROMIS (46)       | 506         | 506          | -0.04 (-0.09, 0.01)         | 0.09 |
| Mali                                                | PROMIS CS (46)    | 952         | 969          | -0.07 (-0.11, -0.03)        | 0.11 |
| Zimbabwe                                            | SHINE (HIV-) (47) | 1880        | 1794         | -0.07 (-0.10, -0.04)        | 0.14 |
| Zimbabwe                                            | SHINE (HIV+) (48) | 337         | 330          | -0.10 (-0.17, -0.02)        | 0.05 |
| <b>I<sup>2</sup> = 0.28, Tau<sup>2</sup> = 0.00</b> |                   | <b>9939</b> | <b>12735</b> | <b>-0.05 (-0.06, -0.03)</b> |      |

**Frequency of contact – Weekly**

|                                                     |                  |             |             |                             |      |
|-----------------------------------------------------|------------------|-------------|-------------|-----------------------------|------|
| Bangladesh                                          | JiVitA-4 (34)    | 2838        | 1244        | -0.04 (-0.06, -0.01)        | 0.21 |
| Bangladesh                                          | WASH-B (36)      | 1158        | 3431        | -0.07 (-0.10, -0.04)        | 0.19 |
| Burkina Faso                                        | iLiNS-Zinc (37)  | 1952        | 664         | -0.11 (-0.14, -0.08)        | 0.19 |
| Ghana                                               | GHANA (39)       | 98          | 96          | -0.02 (-0.09, 0.05)         | 0.08 |
| Ghana                                               | iLiNS-DYADG (40) | 347         | 692         | -0.04 (-0.08, 0.00)         | 0.16 |
| Malawi                                              | iLiNS-DYADM (44) | 220         | 444         | 0.03 (-0.04, 0.11)          | 0.07 |
| Malawi                                              | iLiNS-DOSE (45)  | 696         | 241         | -0.02 (-0.07, 0.04)         | 0.10 |
| <b>I<sup>2</sup> = 0.72, Tau<sup>2</sup> = 0.00</b> |                  | <b>7309</b> | <b>6812</b> | <b>-0.04 (-0.08, -0.01)</b> |      |

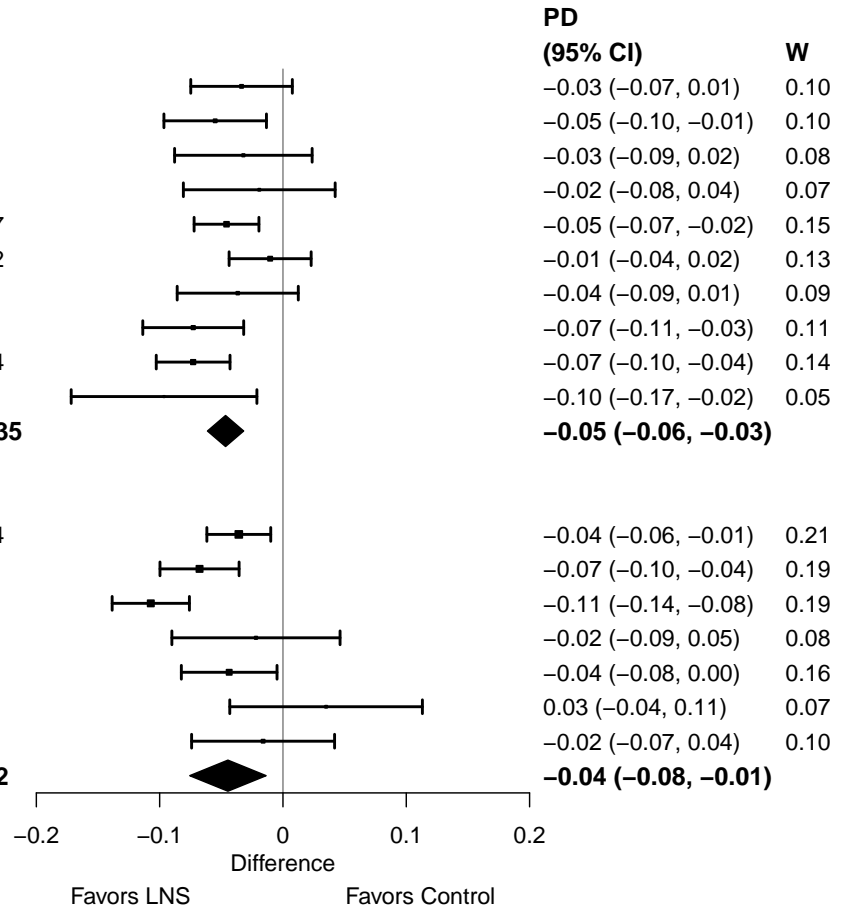

Supplemental figure 4C: Stunting prevalence difference

4C8: Stratified by Average SQ-LNS compliance

**Average SQ-LNS compliance**

(p-diff = 0.803)

**Average SQ-LNS compliance – Low**

| Country      | Trial             | N           | N           | PD (95% CI)                 | W    |
|--------------|-------------------|-------------|-------------|-----------------------------|------|
| Burkina Faso | PROMIS (38)       | 863         | 914         | -0.05 (-0.10, -0.01)        | 0.13 |
| Burkina Faso | PROMIS CS (38)    | 430         | 439         | -0.03 (-0.09, 0.02)         | 0.09 |
| Ghana        | iLiNS-DYADG (40)  | 347         | 692         | -0.04 (-0.08, 0.00)         | 0.14 |
| Malawi       | iLiNS-DYADM (44)  | 220         | 444         | 0.03 (-0.04, 0.11)          | 0.06 |
| Malawi       | iLiNS-DOSE (45)   | 696         | 241         | -0.02 (-0.07, 0.04)         | 0.09 |
| Mali         | PROMIS (46)       | 506         | 506         | -0.04 (-0.09, 0.01)         | 0.11 |
| Mali         | PROMIS CS (46)    | 952         | 969         | -0.07 (-0.11, -0.03)        | 0.14 |
| Zimbabwe     | SHINE (HIV-) (47) | 1880        | 1794        | -0.07 (-0.10, -0.04)        | 0.18 |
| Zimbabwe     | SHINE (HIV+) (48) | 337         | 330         | -0.10 (-0.17, -0.02)        | 0.06 |
|              |                   | <b>6231</b> | <b>6329</b> | <b>-0.05 (-0.07, -0.03)</b> |      |

**I<sup>2</sup> = 0.30, Tau<sup>2</sup> = 0.00**

**Average SQ-LNS compliance – High**

|              |                 |             |              |                             |      |
|--------------|-----------------|-------------|--------------|-----------------------------|------|
| Bangladesh   | JiVitA-4 (34)   | 2838        | 1244         | -0.04 (-0.06, -0.01)        | 0.19 |
| Bangladesh   | RDNS (35)       | 1663        | 815          | -0.03 (-0.07, 0.01)         | 0.13 |
| Bangladesh   | WASH-B (36)     | 1158        | 3431         | -0.07 (-0.10, -0.04)        | 0.17 |
| Burkina Faso | iLiNS-Zinc (37) | 1952        | 664          | -0.11 (-0.14, -0.08)        | 0.17 |
| Ghana        | GHANA (39)      | 98          | 96           | -0.02 (-0.09, 0.05)         | 0.07 |
| Haiti        | HAITI (41)      | 149         | 149          | -0.02 (-0.08, 0.04)         | 0.08 |
| Kenya        | WASH-B (42)     | 1457        | 5137         | -0.05 (-0.07, -0.02)        | 0.19 |
|              |                 | <b>9315</b> | <b>11536</b> | <b>-0.05 (-0.08, -0.03)</b> |      |

**I<sup>2</sup> = 0.65, Tau<sup>2</sup> = 0.00**

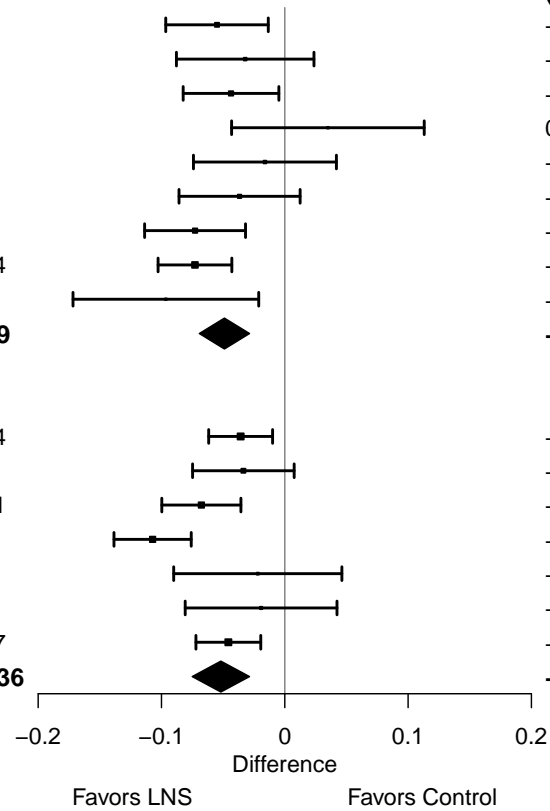

## Supplemental figure 4D: Mean difference in WLZ

### 4D1: Stratified by Geographic region

#### Geographic region

( $p$ -diff = 0.482)

#### Geographic region – SEAR

| Country    | Trial         | N           | N           | MD<br>(95% CI)           | W    |
|------------|---------------|-------------|-------------|--------------------------|------|
| Bangladesh | JiVitA-4 (34) | 2783        | 1217        | 0.08 (0.03, 0.13)        | 0.37 |
| Bangladesh | RDNS (35)     | 1661        | 815         | 0.07 (0.00, 0.15)        | 0.30 |
| Bangladesh | WASH-B (36)   | 1156        | 3424        | 0.12 (0.05, 0.19)        | 0.32 |
|            |               | <b>5600</b> | <b>5456</b> | <b>0.09 (0.06, 0.12)</b> |      |

#### Geographic region – AFR

|              |                   |              |              |                          |      |
|--------------|-------------------|--------------|--------------|--------------------------|------|
| Burkina Faso | iLiNS-Zinc (37)   | 1952         | 664          | 0.18 (0.11, 0.26)        | 0.11 |
| Burkina Faso | PROMIS (38)       | 856          | 907          | 0.10 (-0.03, 0.22)       | 0.07 |
| Burkina Faso | PROMIS CS (38)    | 430          | 436          | -0.11 (-0.24, 0.02)      | 0.07 |
| Ghana        | GHANA (39)        | 98           | 96           | 0.21 (-0.13, 0.54)       | 0.02 |
| Ghana        | iLiNS-DYADG (40)  | 347          | 692          | 0.09 (-0.04, 0.22)       | 0.07 |
| Kenya        | WASH-B (42)       | 1455         | 5118         | 0.06 (0.00, 0.13)        | 0.12 |
| Madagascar   | MAHAY (43)        | 1700         | 1682         | 0.00 (-0.11, 0.11)       | 0.08 |
| Malawi       | iLiNS-DYADM (44)  | 220          | 444          | -0.05 (-0.21, 0.11)      | 0.06 |
| Malawi       | iLiNS-DOSE (45)   | 696          | 241          | 0.01 (-0.12, 0.14)       | 0.07 |
| Mali         | PROMIS (46)       | 499          | 502          | 0.10 (-0.02, 0.23)       | 0.08 |
| Mali         | PROMIS CS (46)    | 944          | 959          | 0.16 (0.06, 0.26)        | 0.09 |
| Zimbabwe     | SHINE (HIV-) (47) | 1869         | 1784         | 0.08 (0.00, 0.15)        | 0.11 |
| Zimbabwe     | SHINE (HIV+) (48) | 336          | 328          | -0.14 (-0.32, 0.04)      | 0.05 |
|              |                   | <b>11402</b> | <b>13853</b> | <b>0.06 (0.00, 0.11)</b> |      |

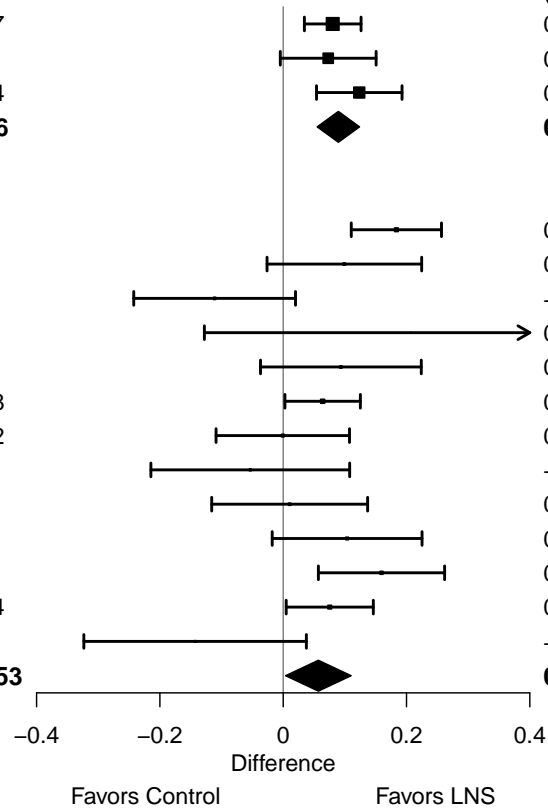

Supplemental figure 4D: Mean difference in WLZ

4D2: Stratified by Stunting burden

**Stunting burden**

(p-diff = 0.264)

**Stunting burden – Less than 35%**

| Country                                             | Trial            | N           | N           |
|-----------------------------------------------------|------------------|-------------|-------------|
| Burkina Faso                                        | PROMIS (38)      | 856         | 907         |
| Burkina Faso                                        | PROMIS CS (38)   | 430         | 436         |
| Ghana                                               | GHANA (39)       | 98          | 96          |
| Ghana                                               | iLiNS-DYADG (40) | 347         | 692         |
| Haiti                                               | HAITI (41)       | 148         | 149         |
| Kenya                                               | WASH-B (42)      | 1455        | 5118        |
| Malawi                                              | iLiNS-DYADM (44) | 220         | 444         |
| <b>I<sup>2</sup> = 0.38, Tau<sup>2</sup> = 0.00</b> |                  | <b>3554</b> | <b>7842</b> |

**Stunting burden – More than 35%**

|                                                     |                   |              |              |
|-----------------------------------------------------|-------------------|--------------|--------------|
| Bangladesh                                          | JiVitA-4 (34)     | 2783         | 1217         |
| Bangladesh                                          | RDNS (35)         | 1661         | 815          |
| Bangladesh                                          | WASH-B (36)       | 1156         | 3424         |
| Burkina Faso                                        | iLiNS-Zinc (37)   | 1952         | 664          |
| Madagascar                                          | MAHAY (43)        | 1700         | 1682         |
| Malawi                                              | iLiNS-DOSE (45)   | 696          | 241          |
| Mali                                                | PROMIS (46)       | 499          | 502          |
| Mali                                                | PROMIS CS (46)    | 944          | 959          |
| Zimbabwe                                            | SHINE (HIV-) (47) | 1869         | 1784         |
| Zimbabwe                                            | SHINE (HIV+) (48) | 336          | 328          |
| <b>I<sup>2</sup> = 0.55, Tau<sup>2</sup> = 0.00</b> |                   | <b>13596</b> | <b>11616</b> |

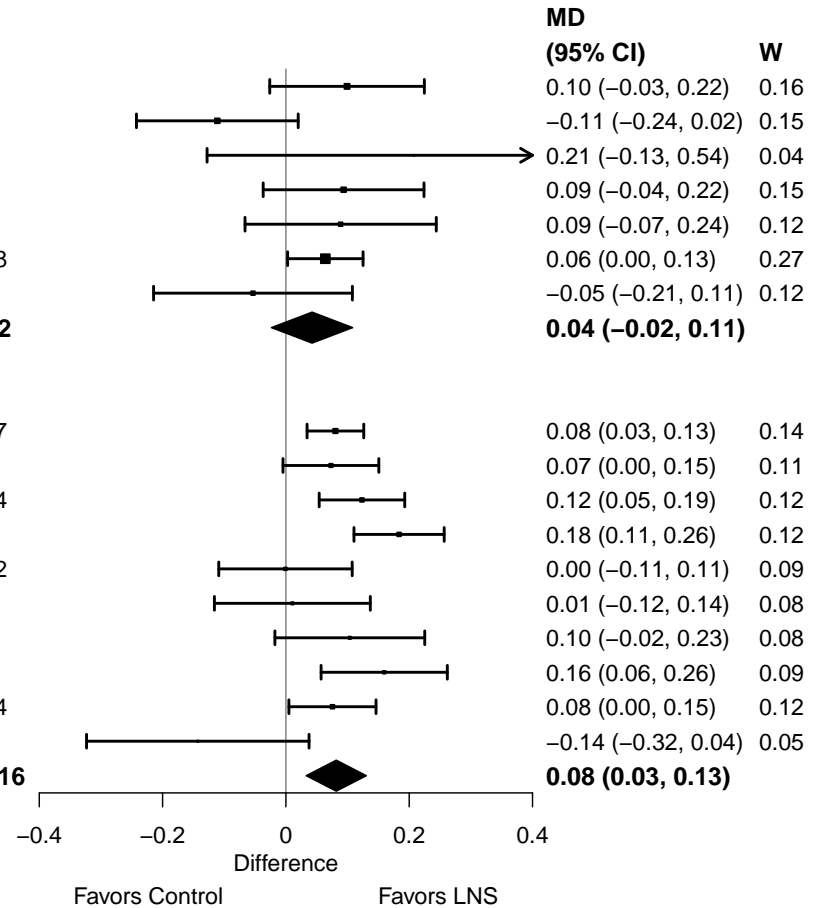

Supplemental figure 4D: Mean difference in WLZ

4D3: Stratified by Malaria prevalence

**Malaria prevalence**

(p-diff = 0.629)

**Malaria prevalence – Less than 10%**

| Country    | Trial             | N            | N            |
|------------|-------------------|--------------|--------------|
| Bangladesh | JiVitA-4 (34)     | 2783         | 1217         |
| Bangladesh | RDNS (35)         | 1661         | 815          |
| Bangladesh | WASH-B (36)       | 1156         | 3424         |
| Haiti      | HAITI (41)        | 148          | 149          |
| Kenya      | WASH-B (42)       | 1455         | 5118         |
| Madagascar | MAHAY (43)        | 1700         | 1682         |
| Zimbabwe   | SHINE (HIV-) (47) | 1869         | 1784         |
| Zimbabwe   | SHINE (HIV+) (48) | 336          | 328          |
|            |                   | <b>11108</b> | <b>14517</b> |

**I<sup>2</sup> = 0.27, Tau<sup>2</sup> = 0.00**

**Malaria prevalence – At least 10%**

|              |                  |             |             |
|--------------|------------------|-------------|-------------|
| Burkina Faso | iLiNS-Zinc (37)  | 1952        | 664         |
| Burkina Faso | PROMIS (38)      | 856         | 907         |
| Burkina Faso | PROMIS CS (38)   | 430         | 436         |
| Ghana        | GHANA (39)       | 98          | 96          |
| Ghana        | iLiNS-DYADG (40) | 347         | 692         |
| Malawi       | iLiNS-DYADM (44) | 220         | 444         |
| Malawi       | iLiNS-DOSE (45)  | 696         | 241         |
| Mali         | PROMIS (46)      | 499         | 502         |
| Mali         | PROMIS CS (46)   | 944         | 959         |
|              |                  | <b>6042</b> | <b>4941</b> |

**I<sup>2</sup> = 0.64, Tau<sup>2</sup> = 0.01**

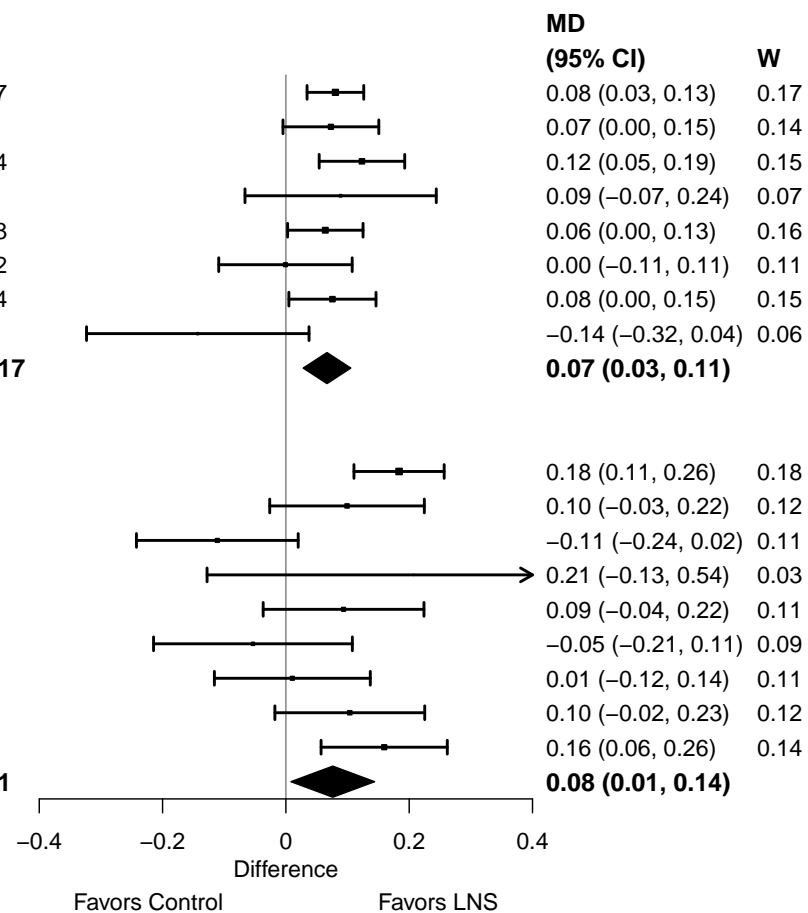

Supplemental figure 4D: Mean difference in WLZ

4D4: Stratified by Source water quality

**Source water quality**  
(p-diff = 0.707)

**Source water quality – Improved**

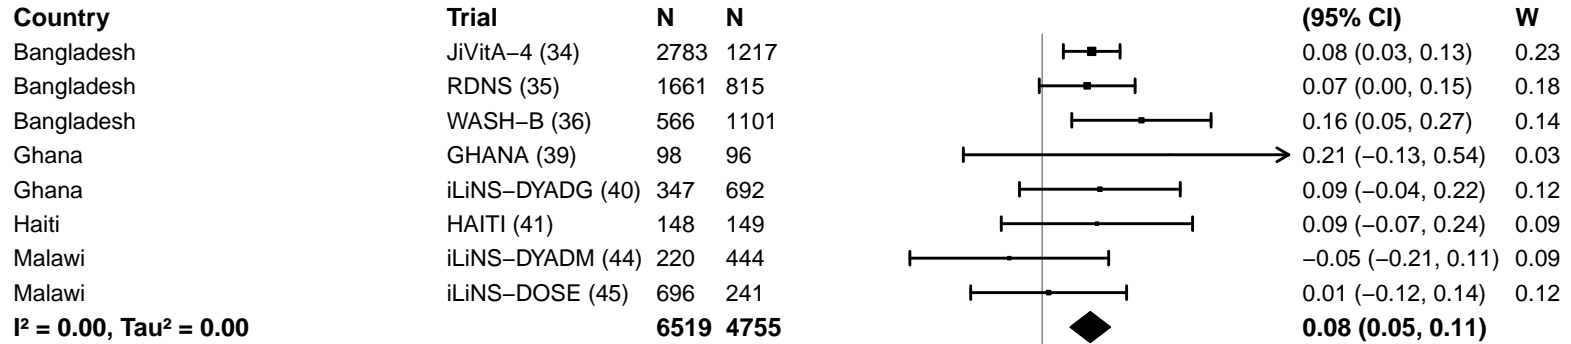

**Source water quality – Unimproved**

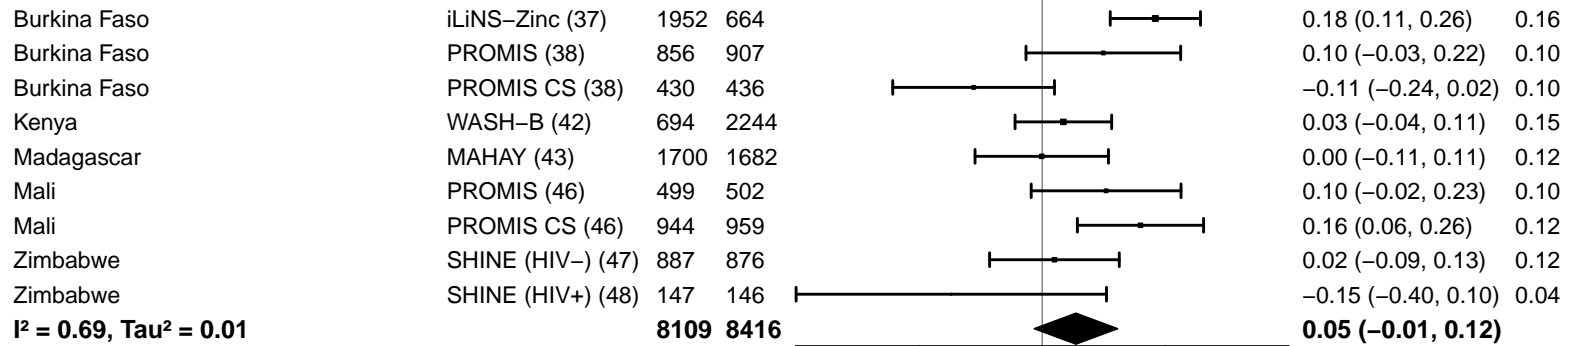



Supplemental figure 4D: Mean difference in WLZ

4D5: Stratified by Sanitation

**Sanitation**  
(p-diff = 0.211)

**Sanitation – Improved**

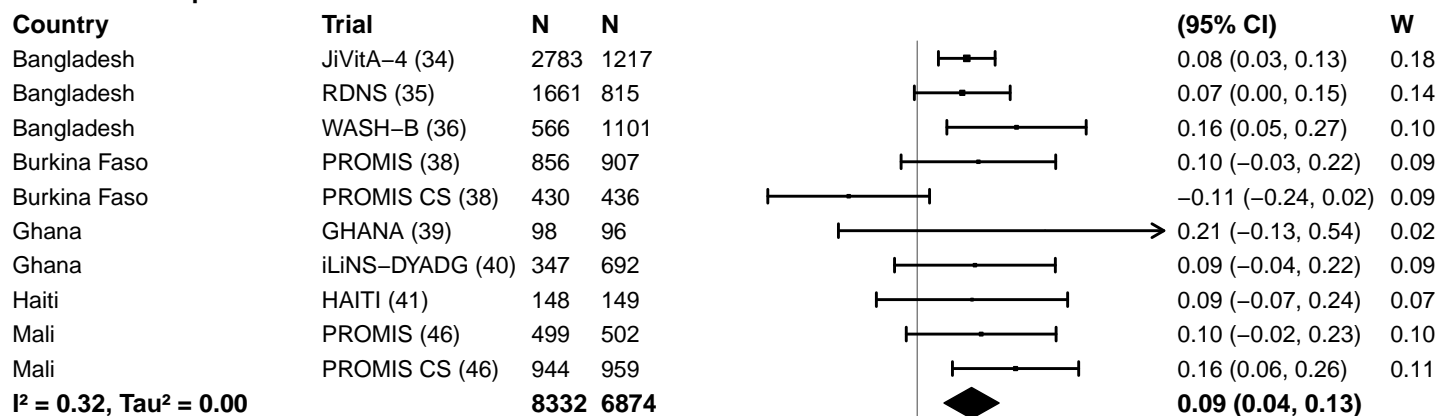

**Sanitation – Unimproved**

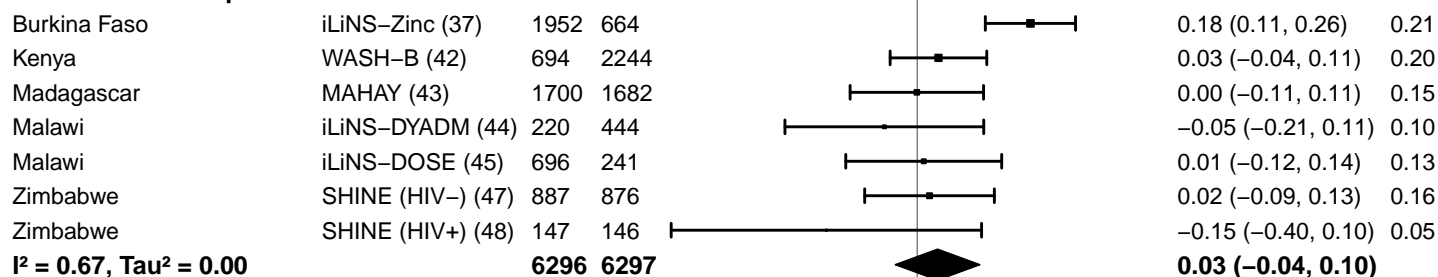

Supplemental figure 4D: Mean difference in WLZ

4D6: Stratified by Supplement duration

Supplement duration

(p-diff = 0.207)

Supplement duration – 12m or less

| Country      | Trial             | N            | N           |
|--------------|-------------------|--------------|-------------|
| Bangladesh   | JiVitA-4 (34)     | 2783         | 1217        |
| Burkina Faso | iLiNS-Zinc (37)   | 1952         | 664         |
| Burkina Faso | PROMIS (38)       | 856          | 907         |
| Burkina Faso | PROMIS CS (38)    | 430          | 436         |
| Ghana        | GHANA (39)        | 98           | 96          |
| Ghana        | iLiNS-DYADG (40)  | 347          | 692         |
| Haiti        | HAITI (41)        | 148          | 149         |
| Madagascar   | MAHAY (43)        | 1700         | 1682        |
| Malawi       | iLiNS-DYADM (44)  | 220          | 444         |
| Malawi       | iLiNS-DOSE (45)   | 696          | 241         |
| Zimbabwe     | SHINE (HIV-) (47) | 1869         | 1784        |
| Zimbabwe     | SHINE (HIV+) (48) | 336          | 328         |
|              |                   | <b>11435</b> | <b>8640</b> |

I<sup>2</sup> = 0.61, Tau<sup>2</sup> = 0.01

Supplement duration – > 12m

|            |                |             |              |
|------------|----------------|-------------|--------------|
| Bangladesh | RDNS (35)      | 1661        | 815          |
| Bangladesh | WASH-B (36)    | 1156        | 3424         |
| Kenya      | WASH-B (42)    | 1455        | 5118         |
| Mali       | PROMIS (46)    | 499         | 502          |
| Mali       | PROMIS CS (46) | 944         | 959          |
|            |                | <b>5715</b> | <b>10818</b> |

I<sup>2</sup> = 0.00, Tau<sup>2</sup> = 0.00

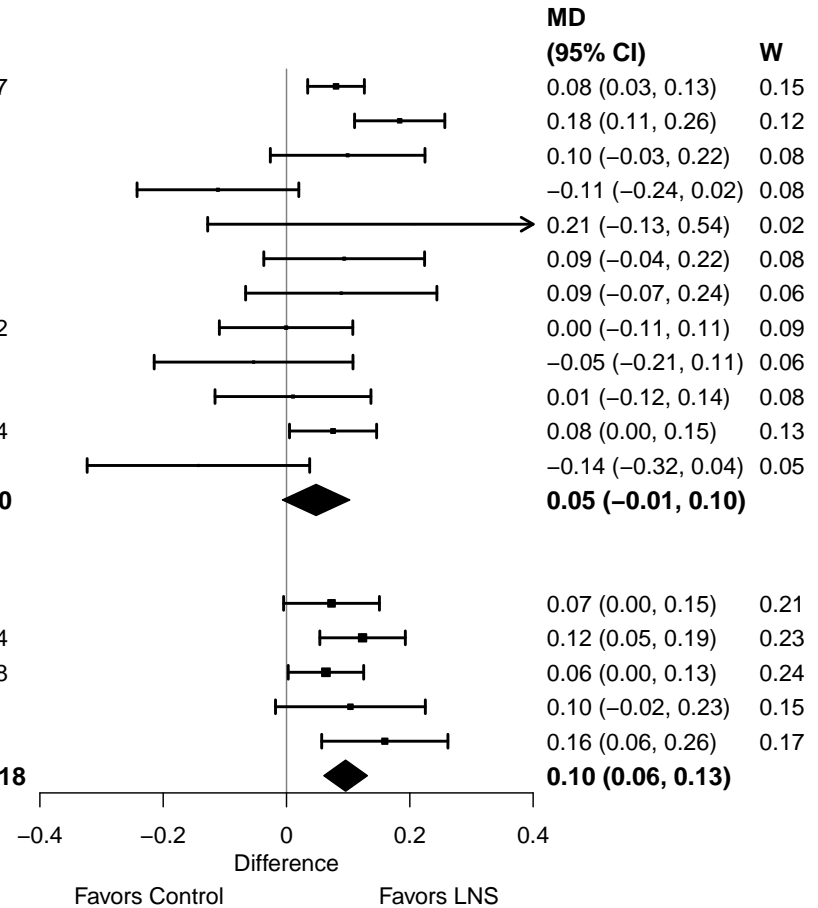

Supplemental figure 4D: Mean difference in WLZ

4D7: Stratified by Frequency of contact

**Frequency of contact**  
(p-diff = 0.251)

**Frequency of contact – Monthly**

| Country                                             | Trial             | N           | N            |
|-----------------------------------------------------|-------------------|-------------|--------------|
| Bangladesh                                          | RDNS (35)         | 1661        | 815          |
| Burkina Faso                                        | PROMIS (38)       | 856         | 907          |
| Burkina Faso                                        | PROMIS CS (38)    | 430         | 436          |
| Haiti                                               | HAITI (41)        | 148         | 149          |
| Kenya                                               | WASH-B (42)       | 1455        | 5118         |
| Madagascar                                          | MAHAY (43)        | 1700        | 1682         |
| Mali                                                | PROMIS (46)       | 499         | 502          |
| Mali                                                | PROMIS CS (46)    | 944         | 959          |
| Zimbabwe                                            | SHINE (HIV-) (47) | 1869        | 1784         |
| Zimbabwe                                            | SHINE (HIV+) (48) | 336         | 328          |
| <b>I<sup>2</sup> = 0.49, Tau<sup>2</sup> = 0.00</b> |                   | <b>9898</b> | <b>12680</b> |

**Frequency of contact – Weekly**

|                                                     |                  |             |             |
|-----------------------------------------------------|------------------|-------------|-------------|
| Bangladesh                                          | JiVitA-4 (34)    | 2783        | 1217        |
| Bangladesh                                          | WASH-B (36)      | 1156        | 3424        |
| Burkina Faso                                        | iLiNS-Zinc (37)  | 1952        | 664         |
| Ghana                                               | GHANA (39)       | 98          | 96          |
| Ghana                                               | iLiNS-DYADG (40) | 347         | 692         |
| Malawi                                              | iLiNS-DYADM (44) | 220         | 444         |
| Malawi                                              | iLiNS-DOSE (45)  | 696         | 241         |
| <b>I<sup>2</sup> = 0.50, Tau<sup>2</sup> = 0.00</b> |                  | <b>7252</b> | <b>6778</b> |

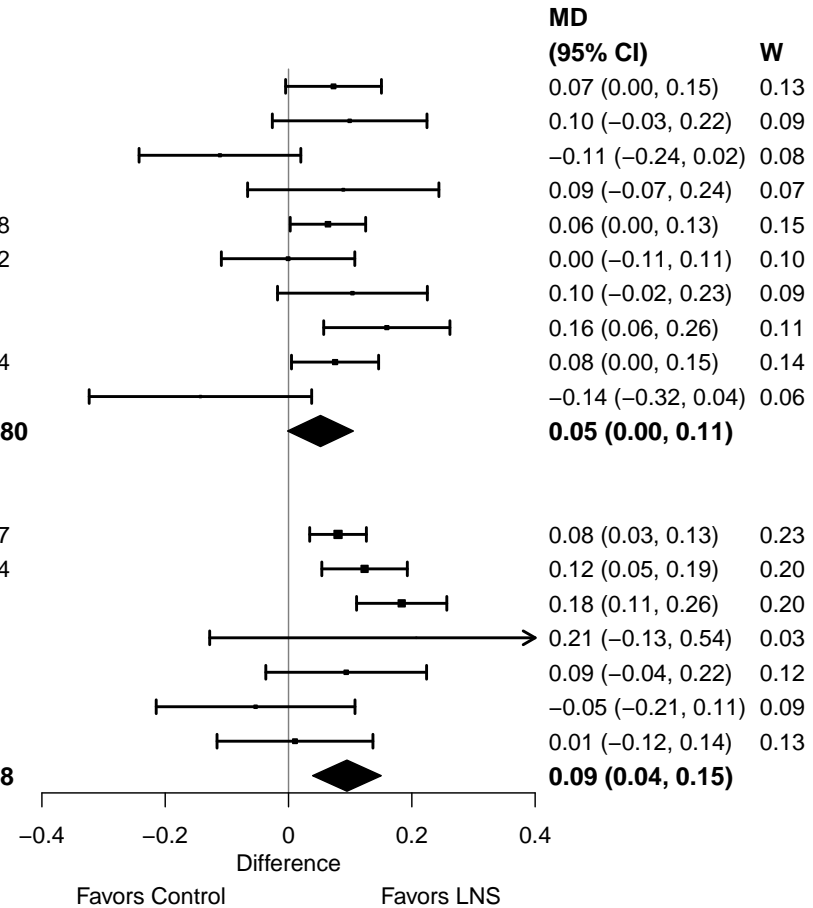

Supplemental figure 4D: Mean difference in WLZ

4D8: Stratified by Average SQ-LNS compliance

**Average SQ-LNS compliance**

(p-diff = 0.101)

**Average SQ-LNS compliance – Low**

| Country      | Trial             | N           | N           |
|--------------|-------------------|-------------|-------------|
| Burkina Faso | PROMIS (38)       | 856         | 907         |
| Burkina Faso | PROMIS CS (38)    | 430         | 436         |
| Ghana        | iLiNS-DYADG (40)  | 347         | 692         |
| Malawi       | iLiNS-DYADM (44)  | 220         | 444         |
| Malawi       | iLiNS-DOSE (45)   | 696         | 241         |
| Mali         | PROMIS (46)       | 499         | 502         |
| Mali         | PROMIS CS (46)    | 944         | 959         |
| Zimbabwe     | SHINE (HIV-) (47) | 1869        | 1784        |
| Zimbabwe     | SHINE (HIV+) (48) | 336         | 328         |
|              |                   | <b>6197</b> | <b>6293</b> |

**I<sup>2</sup> = 0.57, Tau<sup>2</sup> = 0.01**

**Average SQ-LNS compliance – High**

|              |                 |             |              |
|--------------|-----------------|-------------|--------------|
| Bangladesh   | JiVitA-4 (34)   | 2783        | 1217         |
| Bangladesh   | RDNS (35)       | 1661        | 815          |
| Bangladesh   | WASH-B (36)     | 1156        | 3424         |
| Burkina Faso | iLiNS-Zinc (37) | 1952        | 664          |
| Ghana        | GHANA (39)      | 98          | 96           |
| Haiti        | HAITI (41)      | 148         | 149          |
| Kenya        | WASH-B (42)     | 1455        | 5118         |
|              |                 | <b>9253</b> | <b>11483</b> |

**I<sup>2</sup> = 0.28, Tau<sup>2</sup> = 0.00**

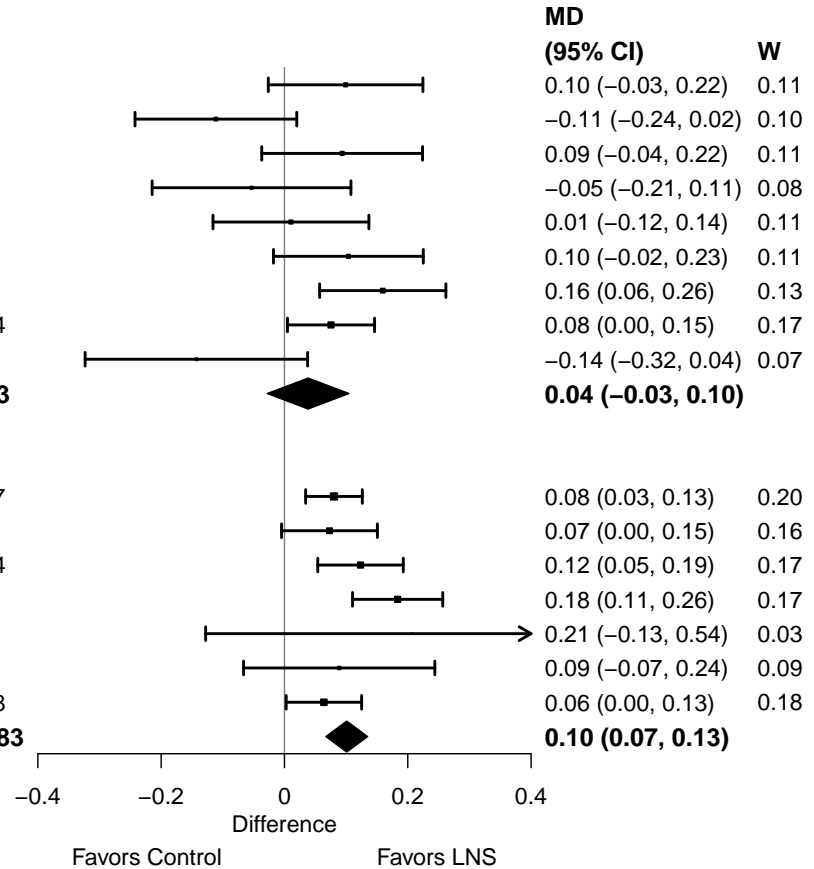

## Supplemental figure 4E: Wasting prevalence ratio

### 4E1: Stratified by Geographic region

#### Geographic region

(p-diff = 0.973)

#### Geographic region – SEAR

| Country                                             | Trial         | N           | N           | PR<br>(95% CI)           | W    |
|-----------------------------------------------------|---------------|-------------|-------------|--------------------------|------|
| Bangladesh                                          | JiVitA-4 (34) | 2783        | 1217        | 0.91 (0.78, 1.05)        | 0.49 |
| Bangladesh                                          | RDNS (35)     | 1661        | 815         | 0.87 (0.70, 1.07)        | 0.23 |
| Bangladesh                                          | WASH-B (36)   | 1156        | 3424        | 0.79 (0.65, 0.96)        | 0.28 |
| <b>I<sup>2</sup> = 0.00, Tau<sup>2</sup> = 0.00</b> |               | <b>5600</b> | <b>5456</b> | <b>0.86 (0.78, 0.96)</b> |      |

#### Geographic region – AFR

|                                                     |                   |              |              |                          |      |
|-----------------------------------------------------|-------------------|--------------|--------------|--------------------------|------|
| Burkina Faso                                        | iLiNS-Zinc (37)   | 1952         | 664          | 0.69 (0.54, 0.87)        | 0.24 |
| Burkina Faso                                        | PROMIS (38)       | 856          | 907          | 0.86 (0.59, 1.27)        | 0.09 |
| Burkina Faso                                        | PROMIS CS (38)    | 430          | 436          | 1.03 (0.72, 1.49)        | 0.10 |
| Ghana                                               | GHANA (39)        | 98           | 96           | 0.87 (0.35, 2.16)        | 0.02 |
| Ghana                                               | iLiNS-DYADG (40)  | 347          | 692          | 0.84 (0.52, 1.37)        | 0.06 |
| Kenya                                               | WASH-B (42)       | 1455         | 5118         | 0.88 (0.53, 1.45)        | 0.05 |
| Madagascar                                          | MAHAY (43)        | 1700         | 1682         | 0.96 (0.67, 1.38)        | 0.10 |
| Malawi                                              | iLiNS-DYADM (44)  | 220          | 444          | 0.94 (0.39, 2.28)        | 0.02 |
| Malawi                                              | iLiNS-DOSE (45)   | 696          | 241          | 1.37 (0.78, 2.40)        | 0.04 |
| Mali                                                | PROMIS (46)       | 499          | 502          | 0.61 (0.15, 2.42)        | 0.01 |
| Mali                                                | PROMIS CS (46)    | 944          | 959          | 0.83 (0.63, 1.10)        | 0.17 |
| Zimbabwe                                            | SHINE (HIV-) (47) | 1869         | 1784         | 0.89 (0.60, 1.34)        | 0.08 |
| Zimbabwe                                            | SHINE (HIV+) (48) | 336          | 328          | 1.38 (0.65, 2.96)        | 0.02 |
| <b>I<sup>2</sup> = 0.00, Tau<sup>2</sup> = 0.00</b> |                   | <b>11402</b> | <b>13853</b> | <b>0.86 (0.77, 0.97)</b> |      |

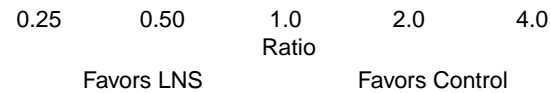

Supplemental figure 4E: Wasting prevalence ratio

4E2: Stratified by Stunting burden

**Stunting burden**

(p-diff = 0.532)

**Stunting burden – Less than 35%**

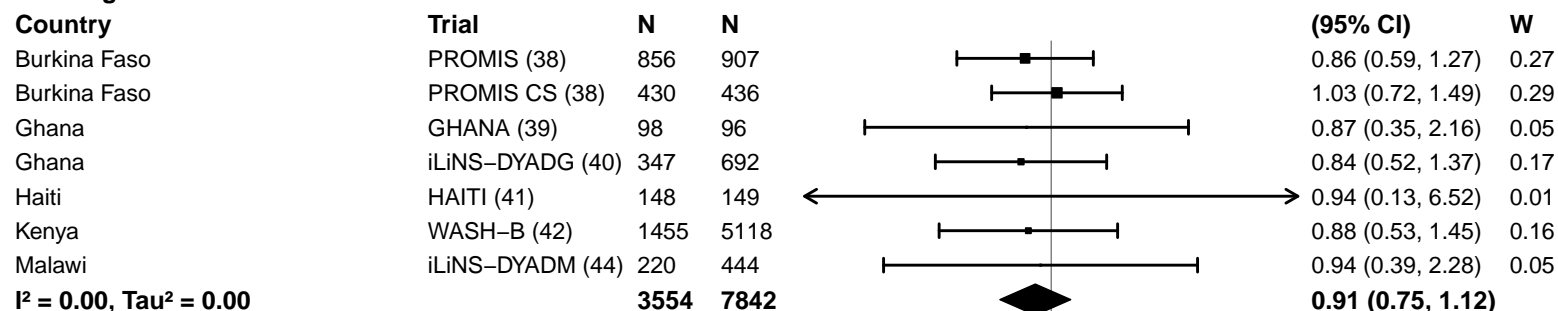

**Stunting burden – More than 35%**

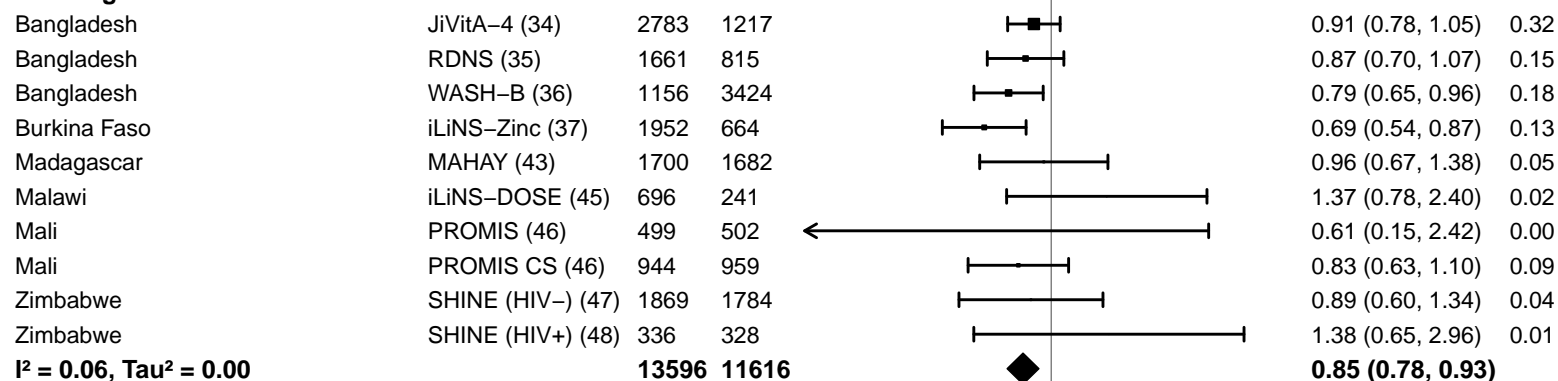

Supplemental figure 4E: Wasting prevalence ratio

4E3: Stratified by Malaria prevalence

**Malaria prevalence**

( $p$ -diff = 0.533)

**Malaria prevalence – Less than 10%**

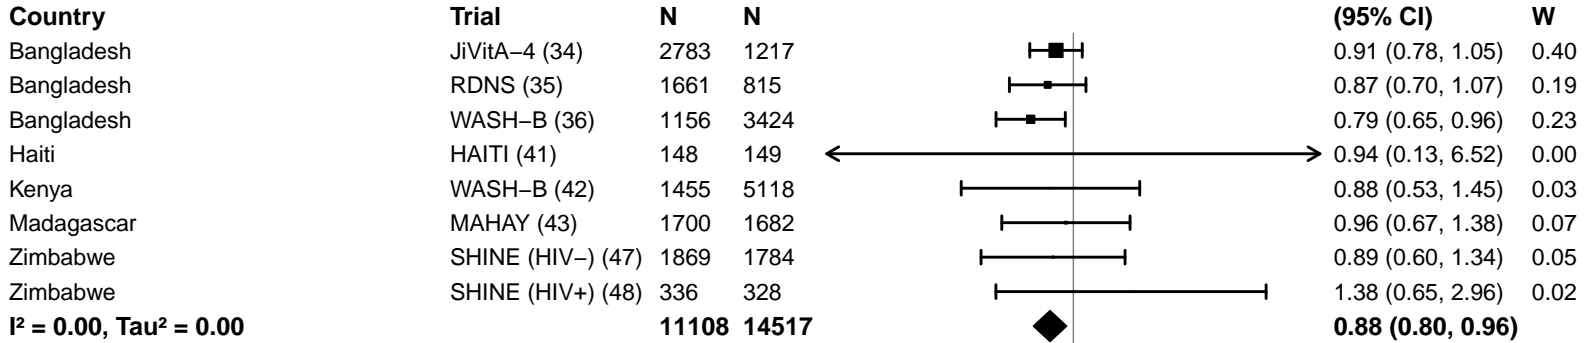

**Malaria prevalence – At least 10%**

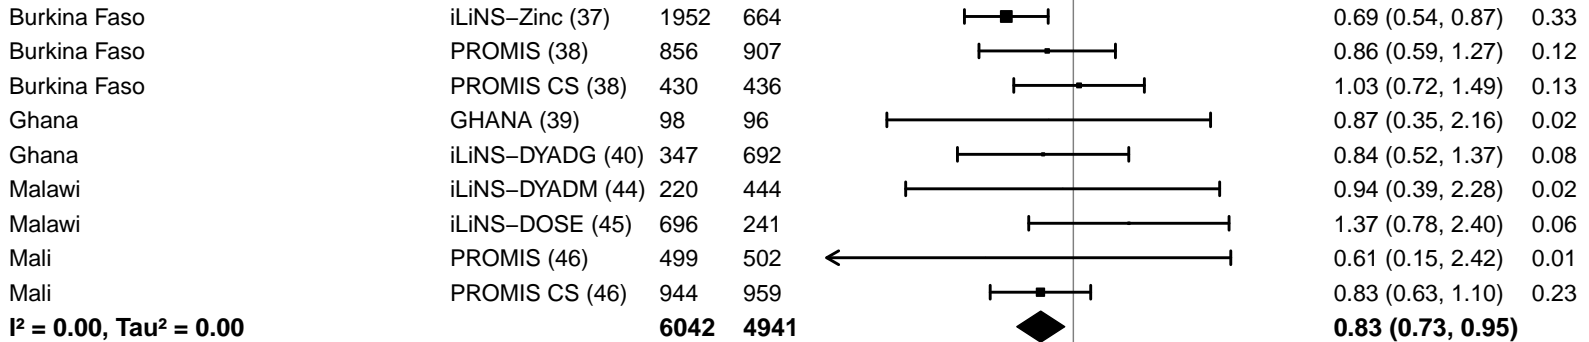

Supplemental figure 4E: Wasting prevalence ratio

4E4: Stratified by Source water quality

Source water quality

(p-diff = 0.371)

Source water quality – Improved

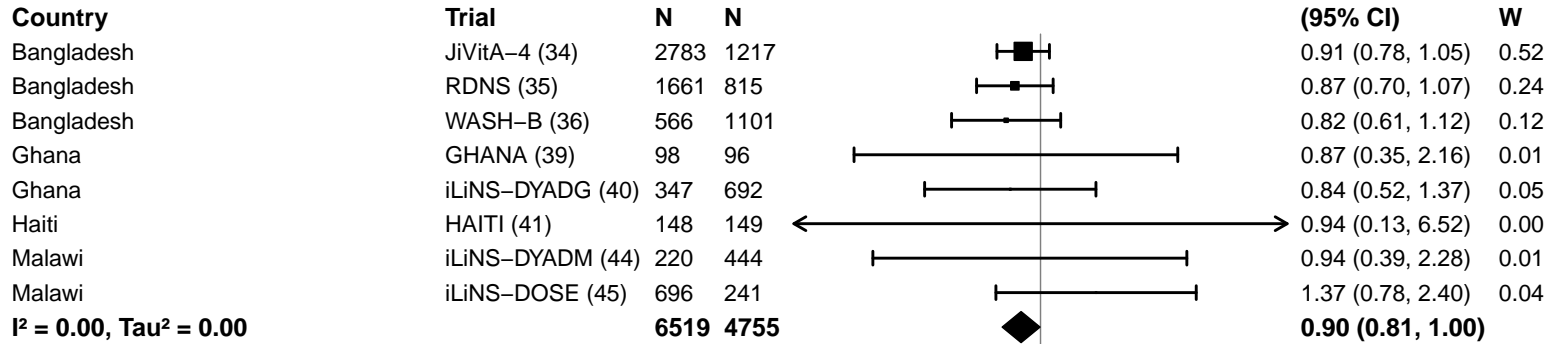

Source water quality – Unimproved

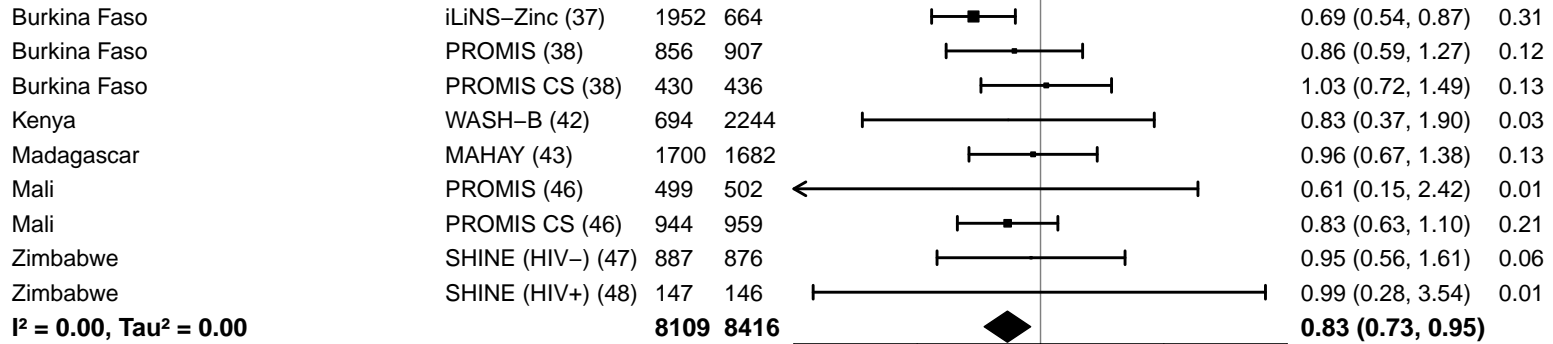



Supplemental figure 4E: Wasting prevalence ratio

4E5: Stratified by Sanitation

**Sanitation**  
(p-diff = 0.532)

**Sanitation – Improved**

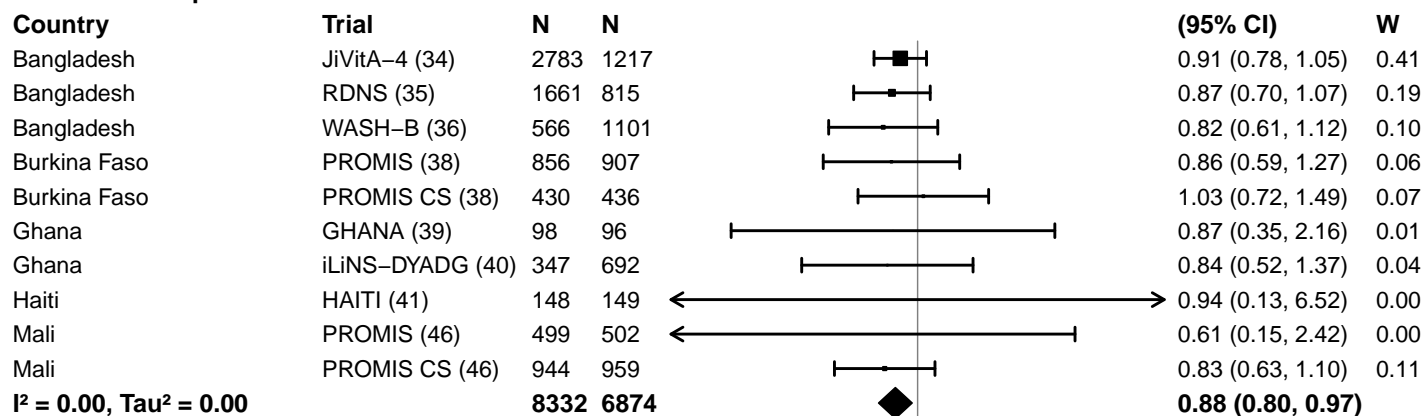

**Sanitation – Unimproved**

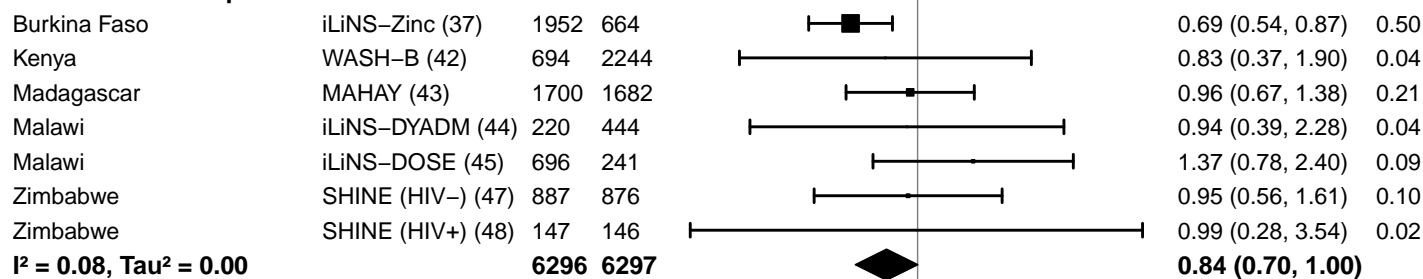

0.25 0.50 1.0 2.0 4.0  
Ratio  
Favors LNS Favors Control

Supplemental figure 4E: Wasting prevalence ratio

4E6: Stratified by Supplement duration

**Supplement duration**

(p-diff = 0.368)

**Supplement duration – 12m or less**

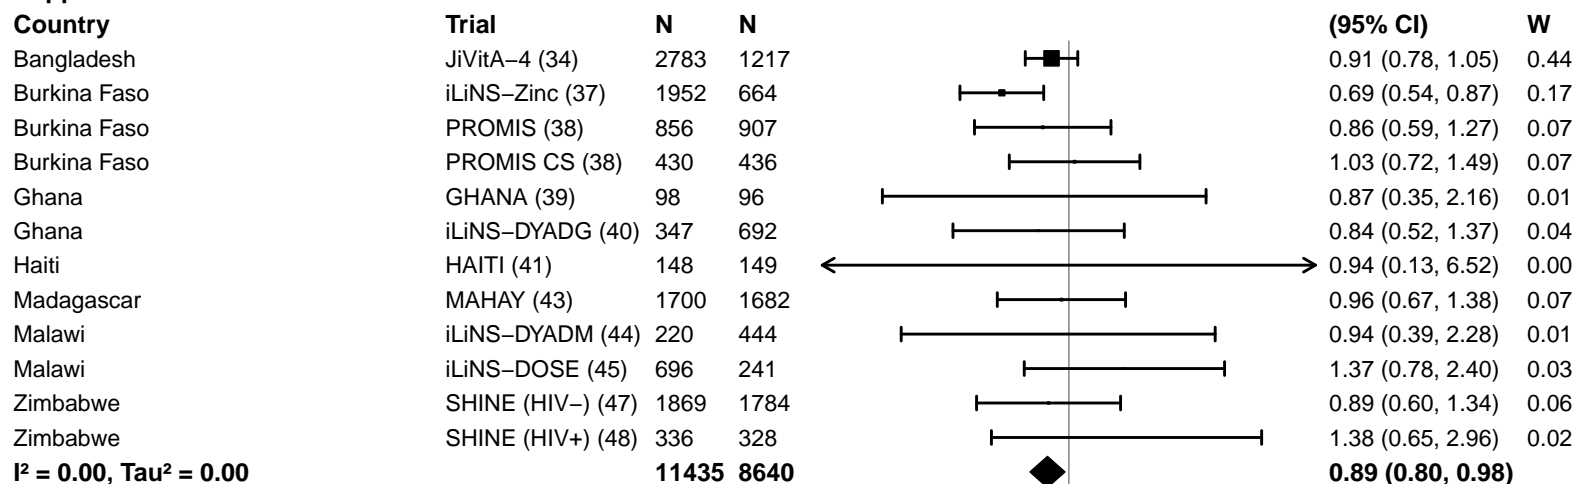

**Supplement duration – > 12m**

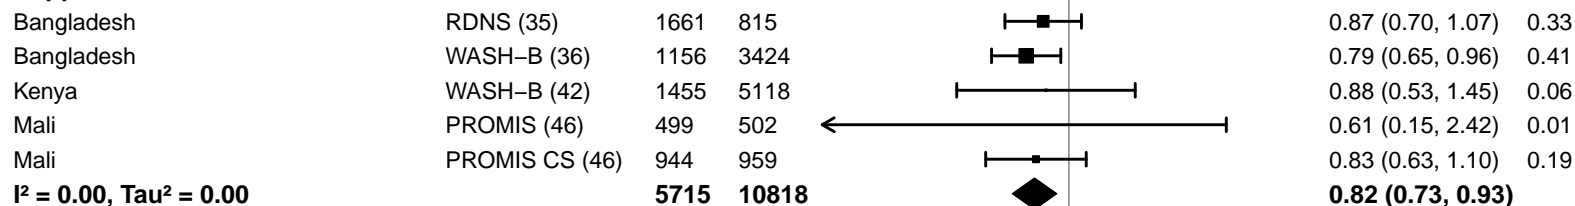

Supplemental figure 4E: Wasting prevalence ratio

4E7: Stratified by Frequency of contact

**Frequency of contact**  
(p-diff = 0.399)

**Frequency of contact – Monthly**

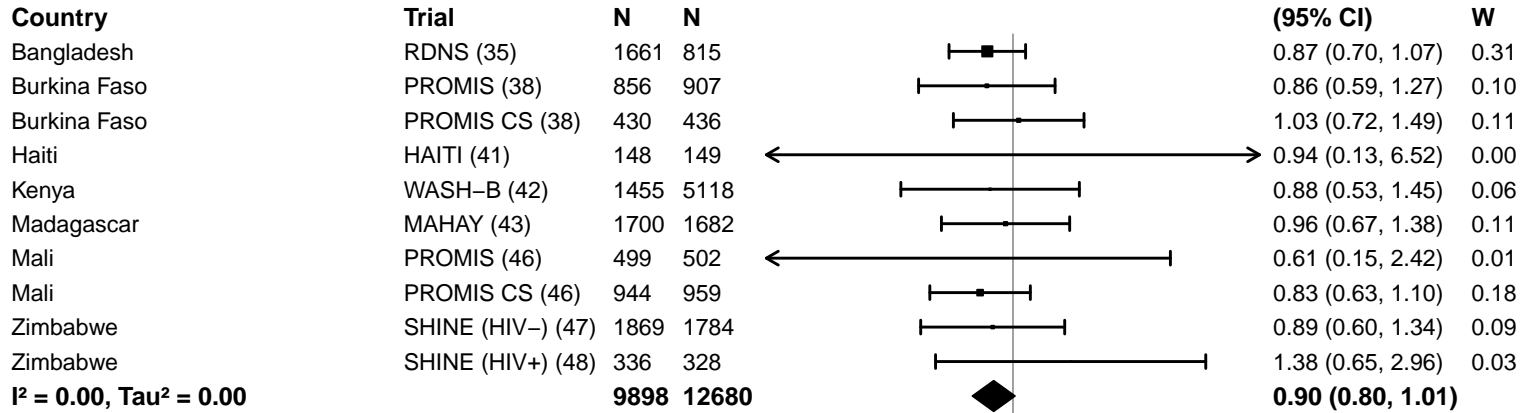

**Frequency of contact – Weekly**

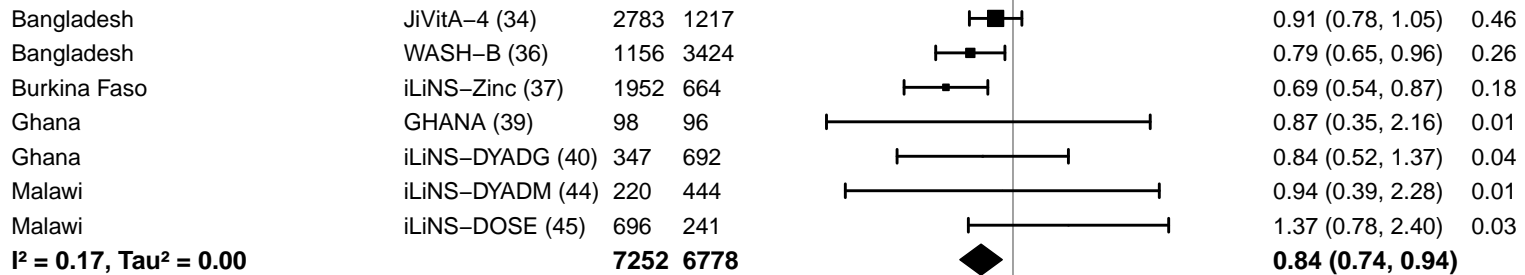

0.25 0.50 1.0 2.0 4.0  
Ratio  
Favors LNS Favors Control

Supplemental figure 4E: Wasting prevalence ratio

4E8: Stratified by Average SQ-LNS compliance

**Average SQ-LNS compliance**  
(p-diff = 0.231)

**Average SQ-LNS compliance – Low**

| Country      | Trial             | N           | N           |
|--------------|-------------------|-------------|-------------|
| Burkina Faso | PROMIS (38)       | 856         | 907         |
| Burkina Faso | PROMIS CS (38)    | 430         | 436         |
| Ghana        | iLiNS-DYADG (40)  | 347         | 692         |
| Malawi       | iLiNS-DYADM (44)  | 220         | 444         |
| Malawi       | iLiNS-DOSE (45)   | 696         | 241         |
| Mali         | PROMIS (46)       | 499         | 502         |
| Mali         | PROMIS CS (46)    | 944         | 959         |
| Zimbabwe     | SHINE (HIV-) (47) | 1869        | 1784        |
| Zimbabwe     | SHINE (HIV+) (48) | 336         | 328         |
|              |                   | <b>6197</b> | <b>6293</b> |

**I<sup>2</sup> = 0.00, Tau<sup>2</sup> = 0.00**

**Average SQ-LNS compliance – High**

|              |                 |             |              |
|--------------|-----------------|-------------|--------------|
| Bangladesh   | JiVitA-4 (34)   | 2783        | 1217         |
| Bangladesh   | RDNS (35)       | 1661        | 815          |
| Bangladesh   | WASH-B (36)     | 1156        | 3424         |
| Burkina Faso | iLiNS-Zinc (37) | 1952        | 664          |
| Ghana        | GHANA (39)      | 98          | 96           |
| Haiti        | HAITI (41)      | 148         | 149          |
| Kenya        | WASH-B (42)     | 1455        | 5118         |
|              |                 | <b>9253</b> | <b>11483</b> |

**I<sup>2</sup> = 0.00, Tau<sup>2</sup> = 0.00**

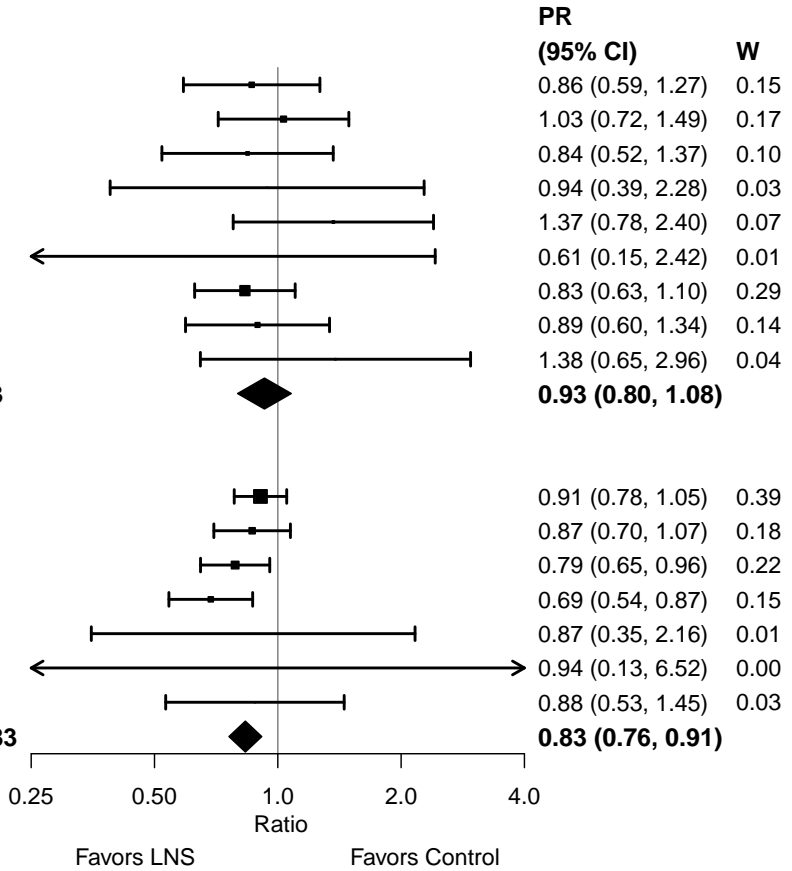

## Supplemental figure 4F: Wasting prevalence difference

### 4F1: Stratified by Geographic region

#### Geographic region

(p-diff = 0.025)

#### Geographic region – SEAR

| Country    | Trial         | N           | N           |
|------------|---------------|-------------|-------------|
| Bangladesh | JiVitA-4 (34) | 2783        | 1217        |
| Bangladesh | RDNS (35)     | 1661        | 815         |
| Bangladesh | WASH-B (36)   | 1156        | 3424        |
|            |               | <b>5600</b> | <b>5456</b> |

**I<sup>2</sup> = 0.00, Tau<sup>2</sup> = 0.00**

#### Geographic region – AFR

|              |                   |              |              |
|--------------|-------------------|--------------|--------------|
| Burkina Faso | iLiNS-Zinc (37)   | 1952         | 664          |
| Burkina Faso | PROMIS (38)       | 856          | 907          |
| Burkina Faso | PROMIS CS (38)    | 430          | 436          |
| Ghana        | GHANA (39)        | 98           | 96           |
| Ghana        | iLiNS-DYADG (40)  | 347          | 692          |
| Kenya        | WASH-B (42)       | 1455         | 5118         |
| Madagascar   | MAHAY (43)        | 1700         | 1682         |
| Malawi       | iLiNS-DYADM (44)  | 220          | 444          |
| Malawi       | iLiNS-DOSE (45)   | 696          | 241          |
| Mali         | PROMIS (46)       | 499          | 502          |
| Mali         | PROMIS CS (46)    | 944          | 959          |
| Zimbabwe     | SHINE (HIV-) (47) | 1869         | 1784         |
| Zimbabwe     | SHINE (HIV+) (48) | 336          | 328          |
|              |                   | <b>11402</b> | <b>13853</b> |

**I<sup>2</sup> = 0.00, Tau<sup>2</sup> = 0.00**

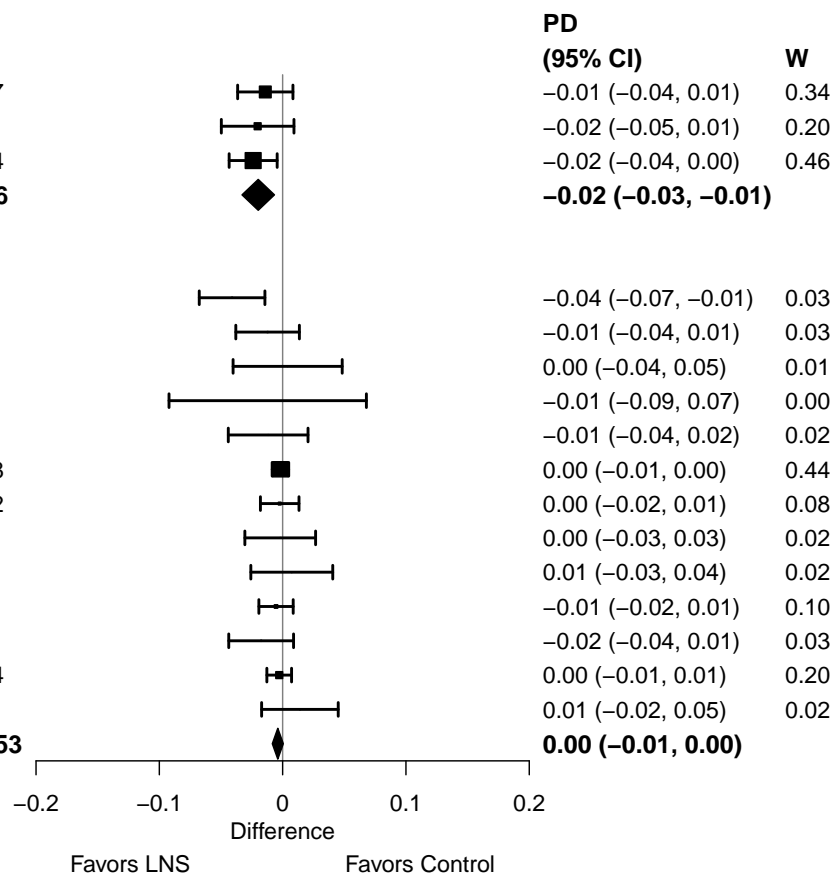

Supplemental figure 4F: Wasting prevalence difference

4F2: Stratified by Stunting burden

**Stunting burden**

( $p$ -diff = 0.203)

**Stunting burden – Less than 35%**

| Country                                                          | Trial            | N           | N           |
|------------------------------------------------------------------|------------------|-------------|-------------|
| Burkina Faso                                                     | PROMIS (38)      | 856         | 907         |
| Burkina Faso                                                     | PROMIS CS (38)   | 430         | 436         |
| Ghana                                                            | GHANA (39)       | 98          | 96          |
| Ghana                                                            | iLiNS-DYADG (40) | 347         | 692         |
| Haiti                                                            | HAITI (41)       | 148         | 149         |
| Kenya                                                            | WASH-B (42)      | 1455        | 5118        |
| Malawi                                                           | iLiNS-DYADM (44) | 220         | 444         |
| <b><math>I^2 = 0.00</math>, <math>\text{Tau}^2 = 0.00</math></b> |                  | <b>3554</b> | <b>7842</b> |

**Stunting burden – More than 35%**

|                                                                  |                   |              |              |
|------------------------------------------------------------------|-------------------|--------------|--------------|
| Bangladesh                                                       | JiVitA-4 (34)     | 2783         | 1217         |
| Bangladesh                                                       | RDNS (35)         | 1661         | 815          |
| Bangladesh                                                       | WASH-B (36)       | 1156         | 3424         |
| Burkina Faso                                                     | iLiNS-Zinc (37)   | 1952         | 664          |
| Madagascar                                                       | MAHAY (43)        | 1700         | 1682         |
| Malawi                                                           | iLiNS-DOSE (45)   | 696          | 241          |
| Mali                                                             | PROMIS (46)       | 499          | 502          |
| Mali                                                             | PROMIS CS (46)    | 944          | 959          |
| Zimbabwe                                                         | SHINE (HIV-) (47) | 1869         | 1784         |
| Zimbabwe                                                         | SHINE (HIV+) (48) | 336          | 328          |
| <b><math>I^2 = 0.37</math>, <math>\text{Tau}^2 = 0.00</math></b> |                   | <b>13596</b> | <b>11616</b> |

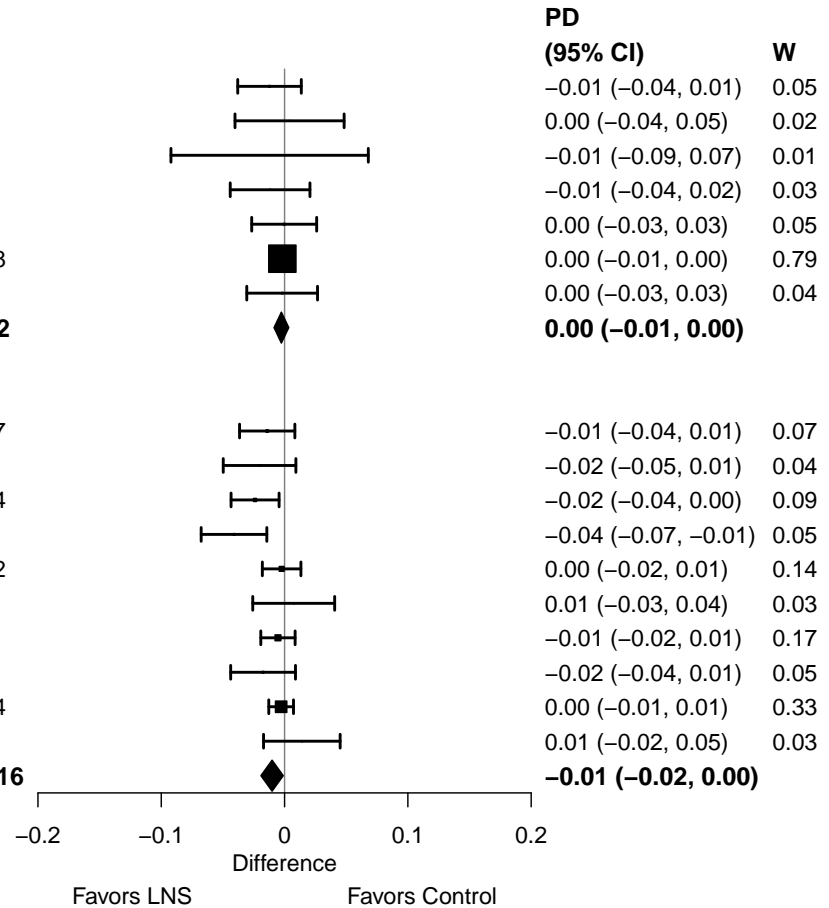

Supplemental figure 4F: Wasting prevalence difference

4F3: Stratified by Malaria prevalence

**Malaria prevalence**

(p-diff = 0.216)

**Malaria prevalence – Less than 10%**

| Country    | Trial             | N            | N            |
|------------|-------------------|--------------|--------------|
| Bangladesh | JiVitA-4 (34)     | 2783         | 1217         |
| Bangladesh | RDNS (35)         | 1661         | 815          |
| Bangladesh | WASH-B (36)       | 1156         | 3424         |
| Haiti      | HAITI (41)        | 148          | 149          |
| Kenya      | WASH-B (42)       | 1455         | 5118         |
| Madagascar | MAHAY (43)        | 1700         | 1682         |
| Zimbabwe   | SHINE (HIV-) (47) | 1869         | 1784         |
| Zimbabwe   | SHINE (HIV+) (48) | 336          | 328          |
|            |                   | <b>11108</b> | <b>14517</b> |

**I<sup>2</sup> = 0.11, Tau<sup>2</sup> = 0.00**

**Malaria prevalence – At least 10%**

|              |                  |             |             |
|--------------|------------------|-------------|-------------|
| Burkina Faso | iLiNS-Zinc (37)  | 1952        | 664         |
| Burkina Faso | PROMIS (38)      | 856         | 907         |
| Burkina Faso | PROMIS CS (38)   | 430         | 436         |
| Ghana        | GHANA (39)       | 98          | 96          |
| Ghana        | iLiNS-DYADG (40) | 347         | 692         |
| Malawi       | iLiNS-DYADM (44) | 220         | 444         |
| Malawi       | iLiNS-DOSE (45)  | 696         | 241         |
| Mali         | PROMIS (46)      | 499         | 502         |
| Mali         | PROMIS CS (46)   | 944         | 959         |
|              |                  | <b>6042</b> | <b>4941</b> |

**I<sup>2</sup> = 0.00, Tau<sup>2</sup> = 0.00**

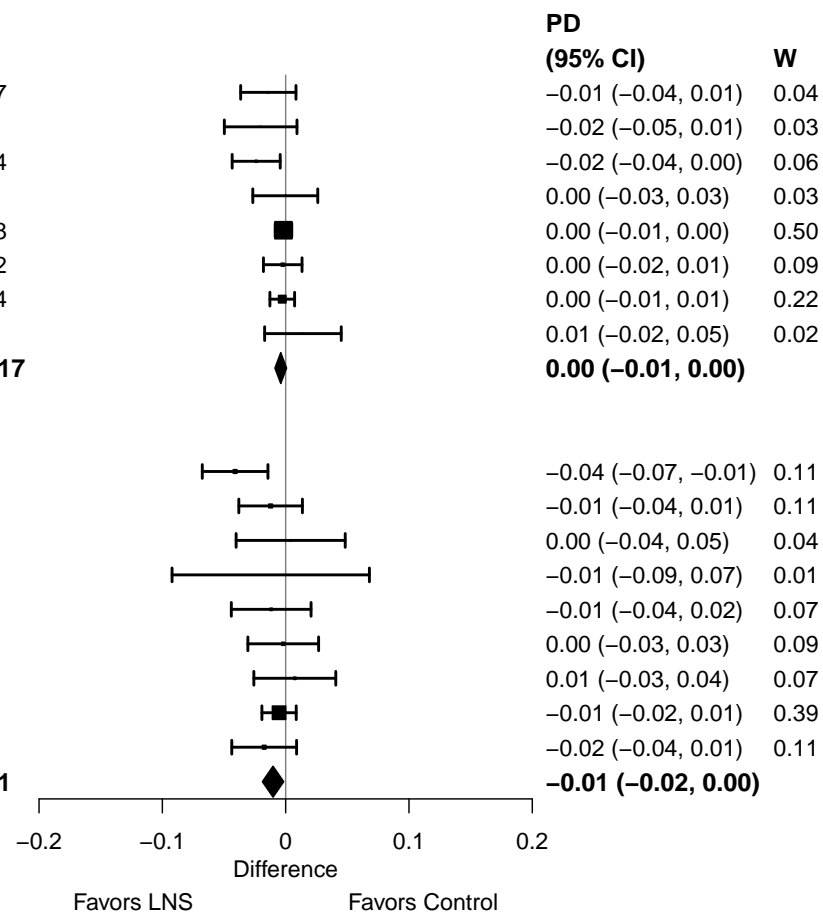

Supplemental figure 4F: Wasting prevalence difference

4F4: Stratified by Source water quality

**Source water quality**  
(p-diff = 0.560)

**Source water quality – Improved**

| Country                                             | Trial            | N           | N           | PD (95% CI)                | W    |
|-----------------------------------------------------|------------------|-------------|-------------|----------------------------|------|
| Bangladesh                                          | JiVitA-4 (34)    | 2783        | 1217        | -0.01 (-0.04, 0.01)        | 0.22 |
| Bangladesh                                          | RDNS (35)        | 1661        | 815         | -0.02 (-0.05, 0.01)        | 0.13 |
| Bangladesh                                          | WASH-B (36)      | 566         | 1101        | -0.02 (-0.05, 0.01)        | 0.13 |
| Ghana                                               | GHANA (39)       | 98          | 96          | -0.01 (-0.09, 0.07)        | 0.02 |
| Ghana                                               | iLiNS-DYADG (40) | 347         | 692         | -0.01 (-0.04, 0.02)        | 0.11 |
| Haiti                                               | HAITI (41)       | 148         | 149         | 0.00 (-0.03, 0.03)         | 0.16 |
| Malawi                                              | iLiNS-DYADM (44) | 220         | 444         | 0.00 (-0.03, 0.03)         | 0.14 |
| Malawi                                              | iLiNS-DOSE (45)  | 696         | 241         | 0.01 (-0.03, 0.04)         | 0.10 |
| <b>I<sup>2</sup> = 0.00, Tau<sup>2</sup> = 0.00</b> |                  | <b>6519</b> | <b>4755</b> | <b>-0.01 (-0.02, 0.00)</b> |      |

**Source water quality – Unimproved**

|                                                     |                   |             |             |                            |      |
|-----------------------------------------------------|-------------------|-------------|-------------|----------------------------|------|
| Burkina Faso                                        | iLiNS-Zinc (37)   | 1952        | 664         | -0.04 (-0.07, -0.01)       | 0.05 |
| Burkina Faso                                        | PROMIS (38)       | 856         | 907         | -0.01 (-0.04, 0.01)        | 0.05 |
| Burkina Faso                                        | PROMIS CS (38)    | 430         | 436         | 0.00 (-0.04, 0.05)         | 0.02 |
| Kenya                                               | WASH-B (42)       | 694         | 2244        | 0.00 (-0.01, 0.01)         | 0.38 |
| Madagascar                                          | MAHAY (43)        | 1700        | 1682        | 0.00 (-0.02, 0.01)         | 0.13 |
| Mali                                                | PROMIS (46)       | 499         | 502         | -0.01 (-0.02, 0.01)        | 0.17 |
| Mali                                                | PROMIS CS (46)    | 944         | 959         | -0.02 (-0.04, 0.01)        | 0.05 |
| Zimbabwe                                            | SHINE (HIV-) (47) | 887         | 876         | 0.00 (-0.02, 0.01)         | 0.14 |
| Zimbabwe                                            | SHINE (HIV+) (48) | 147         | 146         | 0.00 (-0.05, 0.05)         | 0.02 |
| <b>I<sup>2</sup> = 0.11, Tau<sup>2</sup> = 0.00</b> |                   | <b>8109</b> | <b>8416</b> | <b>-0.01 (-0.01, 0.00)</b> |      |

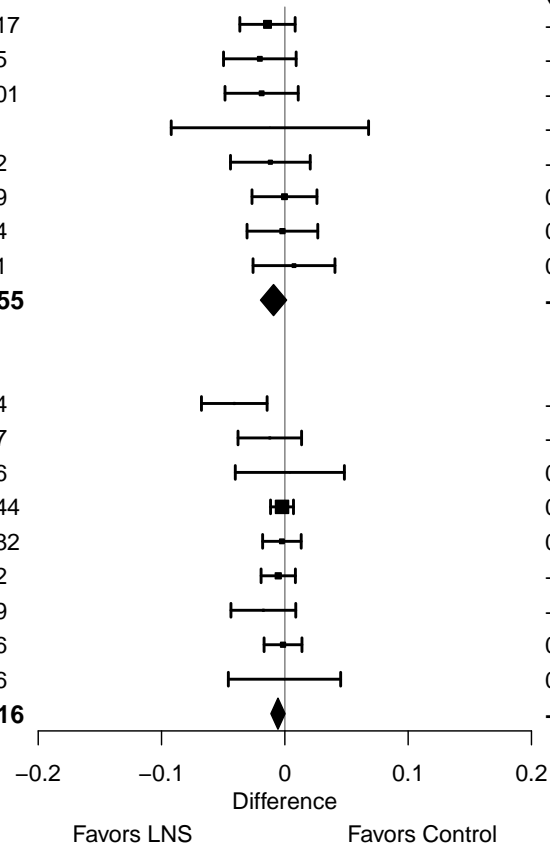



Supplemental figure 4F: Wasting prevalence difference

4F5: Stratified by Sanitation

**Sanitation**  
(p-diff = 0.251)

**Sanitation – Improved**

| Country                                             | Trial            | N           | N           |
|-----------------------------------------------------|------------------|-------------|-------------|
| Bangladesh                                          | JiVitA-4 (34)    | 2783        | 1217        |
| Bangladesh                                          | RDNS (35)        | 1661        | 815         |
| Bangladesh                                          | WASH-B (36)      | 566         | 1101        |
| Burkina Faso                                        | PROMIS (38)      | 856         | 907         |
| Burkina Faso                                        | PROMIS CS (38)   | 430         | 436         |
| Ghana                                               | GHANA (39)       | 98          | 96          |
| Ghana                                               | iLiNS-DYADG (40) | 347         | 692         |
| Haiti                                               | HAITI (41)       | 148         | 149         |
| Mali                                                | PROMIS (46)      | 499         | 502         |
| Mali                                                | PROMIS CS (46)   | 944         | 959         |
| <b>I<sup>2</sup> = 0.00, Tau<sup>2</sup> = 0.00</b> |                  | <b>8332</b> | <b>6874</b> |

**Sanitation – Unimproved**

|                                                     |                   |             |             |
|-----------------------------------------------------|-------------------|-------------|-------------|
| Burkina Faso                                        | iLiNS-Zinc (37)   | 1952        | 664         |
| Kenya                                               | WASH-B (42)       | 694         | 2244        |
| Madagascar                                          | MAHAY (43)        | 1700        | 1682        |
| Malawi                                              | iLiNS-DYADM (44)  | 220         | 444         |
| Malawi                                              | iLiNS-DOSE (45)   | 696         | 241         |
| Zimbabwe                                            | SHINE (HIV-) (47) | 887         | 876         |
| Zimbabwe                                            | SHINE (HIV+) (48) | 147         | 146         |
| <b>I<sup>2</sup> = 0.27, Tau<sup>2</sup> = 0.00</b> |                   | <b>6296</b> | <b>6297</b> |

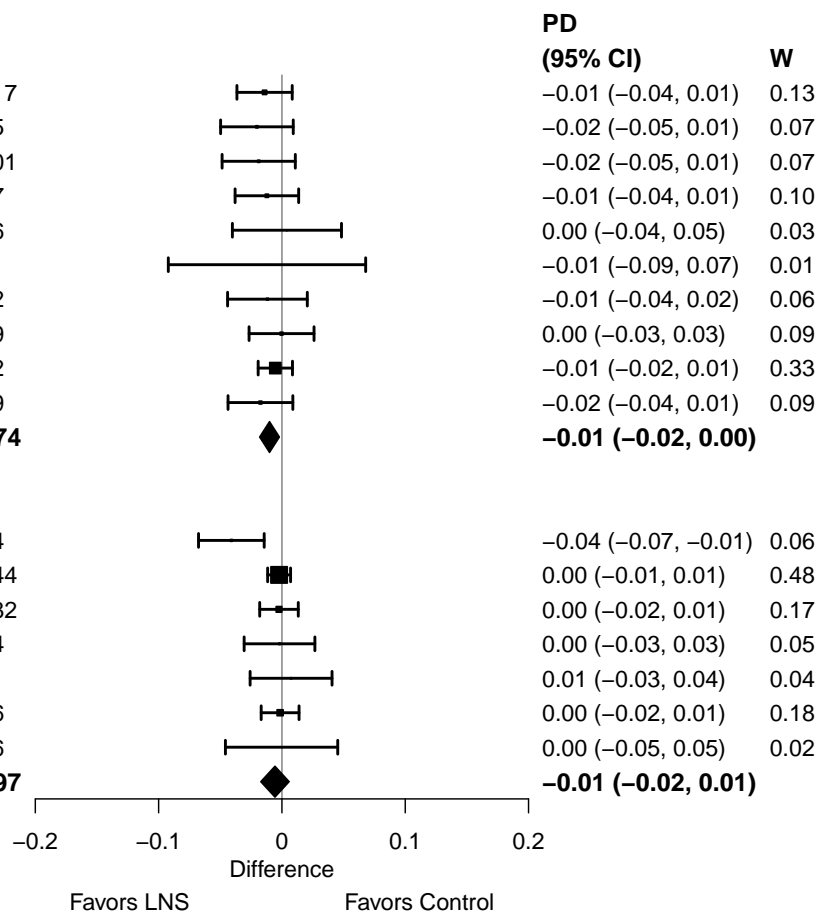

Supplemental figure 4F: Wasting prevalence difference

4F6: Stratified by Supplement duration

**Supplement duration**

(p-diff = 0.696)

**Supplement duration – 12m or less**

| Country                                             | Trial             | N            | N           |  | PD<br>(95% CI)             | W    |
|-----------------------------------------------------|-------------------|--------------|-------------|--|----------------------------|------|
| Bangladesh                                          | JiVitA-4 (34)     | 2783         | 1217        |  | -0.01 (-0.04, 0.01)        | 0.08 |
| Burkina Faso                                        | iLiNS-Zinc (37)   | 1952         | 664         |  | -0.04 (-0.07, -0.01)       | 0.06 |
| Burkina Faso                                        | PROMIS (38)       | 856          | 907         |  | -0.01 (-0.04, 0.01)        | 0.06 |
| Burkina Faso                                        | PROMIS CS (38)    | 430          | 436         |  | 0.00 (-0.04, 0.05)         | 0.02 |
| Ghana                                               | GHANA (39)        | 98           | 96          |  | -0.01 (-0.09, 0.07)        | 0.01 |
| Ghana                                               | iLiNS-DYADG (40)  | 347          | 692         |  | -0.01 (-0.04, 0.02)        | 0.04 |
| Haiti                                               | HAITI (41)        | 148          | 149         |  | 0.00 (-0.03, 0.03)         | 0.06 |
| Madagascar                                          | MAHAY (43)        | 1700         | 1682        |  | 0.00 (-0.02, 0.01)         | 0.16 |
| Malawi                                              | iLiNS-DYADM (44)  | 220          | 444         |  | 0.00 (-0.03, 0.03)         | 0.05 |
| Malawi                                              | iLiNS-DOSE (45)   | 696          | 241         |  | 0.01 (-0.03, 0.04)         | 0.04 |
| Zimbabwe                                            | SHINE (HIV-) (47) | 1869         | 1784        |  | 0.00 (-0.01, 0.01)         | 0.40 |
| Zimbabwe                                            | SHINE (HIV+) (48) | 336          | 328         |  | 0.01 (-0.02, 0.05)         | 0.04 |
| <b>I<sup>2</sup> = 0.00, Tau<sup>2</sup> = 0.00</b> |                   | <b>11435</b> | <b>8640</b> |  | <b>-0.01 (-0.01, 0.00)</b> |      |

**Supplement duration – > 12m**

|                                                     |                |             |              |  |                            |      |
|-----------------------------------------------------|----------------|-------------|--------------|--|----------------------------|------|
| Bangladesh                                          | RDNS (35)      | 1661        | 815          |  | -0.02 (-0.05, 0.01)        | 0.04 |
| Bangladesh                                          | WASH-B (36)    | 1156        | 3424         |  | -0.02 (-0.04, 0.00)        | 0.08 |
| Kenya                                               | WASH-B (42)    | 1455        | 5118         |  | 0.00 (-0.01, 0.00)         | 0.68 |
| Mali                                                | PROMIS (46)    | 499         | 502          |  | -0.01 (-0.02, 0.01)        | 0.16 |
| Mali                                                | PROMIS CS (46) | 944         | 959          |  | -0.02 (-0.04, 0.01)        | 0.04 |
| <b>I<sup>2</sup> = 0.37, Tau<sup>2</sup> = 0.00</b> |                | <b>5715</b> | <b>10818</b> |  | <b>-0.01 (-0.02, 0.00)</b> |      |

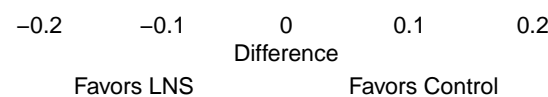

Supplemental figure 4F: Wasting prevalence difference

4F7: Stratified by Frequency of contact

Frequency of contact  
(p-diff = 0.017)

Frequency of contact – Monthly

| Country                                             | Trial             | N           | N            | PD<br>(95% CI)            | W    |
|-----------------------------------------------------|-------------------|-------------|--------------|---------------------------|------|
| Bangladesh                                          | RDNS (35)         | 1661        | 815          | -0.02 (-0.05, 0.01)       | 0.02 |
| Burkina Faso                                        | PROMIS (38)       | 856         | 907          | -0.01 (-0.04, 0.01)       | 0.03 |
| Burkina Faso                                        | PROMIS CS (38)    | 430         | 436          | 0.00 (-0.04, 0.05)        | 0.01 |
| Haiti                                               | HAITI (41)        | 148         | 149          | 0.00 (-0.03, 0.03)        | 0.03 |
| Kenya                                               | WASH-B (42)       | 1455        | 5118         | 0.00 (-0.01, 0.00)        | 0.46 |
| Madagascar                                          | MAHAY (43)        | 1700        | 1682         | 0.00 (-0.02, 0.01)        | 0.08 |
| Mali                                                | PROMIS (46)       | 499         | 502          | -0.01 (-0.02, 0.01)       | 0.11 |
| Mali                                                | PROMIS CS (46)    | 944         | 959          | -0.02 (-0.04, 0.01)       | 0.03 |
| Zimbabwe                                            | SHINE (HIV-) (47) | 1869        | 1784         | 0.00 (-0.01, 0.01)        | 0.21 |
| Zimbabwe                                            | SHINE (HIV+) (48) | 336         | 328          | 0.01 (-0.02, 0.05)        | 0.02 |
| <b>I<sup>2</sup> = 0.00, Tau<sup>2</sup> = 0.00</b> |                   | <b>9898</b> | <b>12680</b> | <b>0.00 (-0.01, 0.00)</b> |      |

Frequency of contact – Weekly

|                                                     |                  |             |             |                             |      |
|-----------------------------------------------------|------------------|-------------|-------------|-----------------------------|------|
| Bangladesh                                          | JiVitA-4 (34)    | 2783        | 1217        | -0.01 (-0.04, 0.01)         | 0.21 |
| Bangladesh                                          | WASH-B (36)      | 1156        | 3424        | -0.02 (-0.04, 0.00)         | 0.28 |
| Burkina Faso                                        | iLiNS-Zinc (37)  | 1952        | 664         | -0.04 (-0.07, -0.01)        | 0.15 |
| Ghana                                               | GHANA (39)       | 98          | 96          | -0.01 (-0.09, 0.07)         | 0.02 |
| Ghana                                               | iLiNS-DYADG (40) | 347         | 692         | -0.01 (-0.04, 0.02)         | 0.10 |
| Malawi                                              | iLiNS-DYADM (44) | 220         | 444         | 0.00 (-0.03, 0.03)          | 0.13 |
| Malawi                                              | iLiNS-DOSE (45)  | 696         | 241         | 0.01 (-0.03, 0.04)          | 0.10 |
| <b>I<sup>2</sup> = 0.13, Tau<sup>2</sup> = 0.00</b> |                  | <b>7252</b> | <b>6778</b> | <b>-0.02 (-0.03, -0.01)</b> |      |

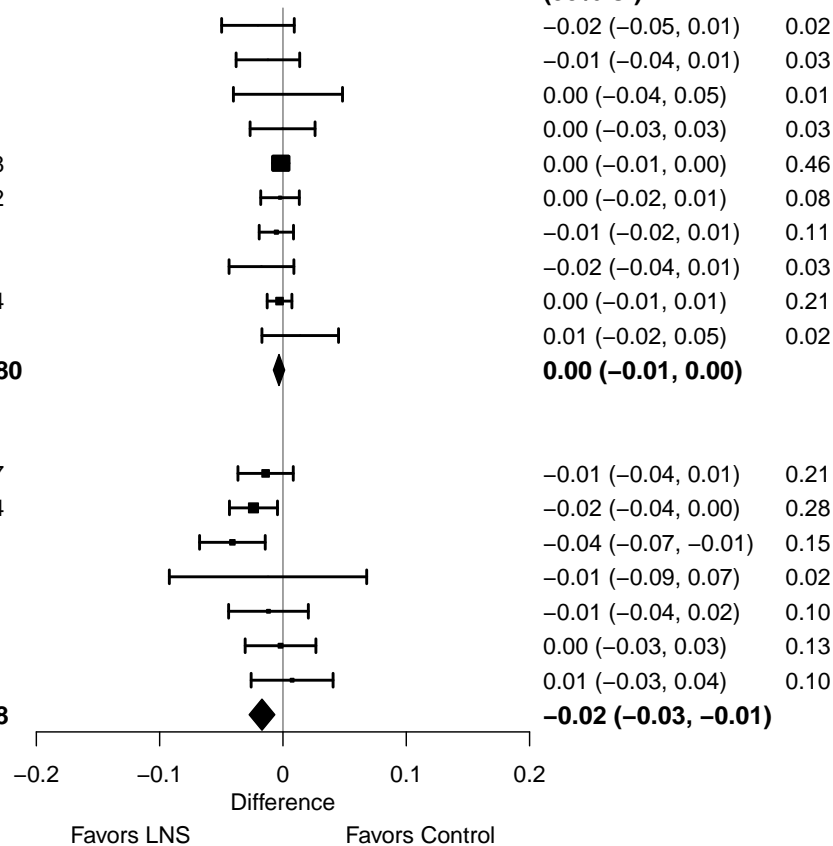

Supplemental figure 4F: Wasting prevalence difference

4F8: Stratified by Average SQ-LNS compliance

Average SQ-LNS compliance

(p-diff = 0.204)

Average SQ-LNS compliance – Low

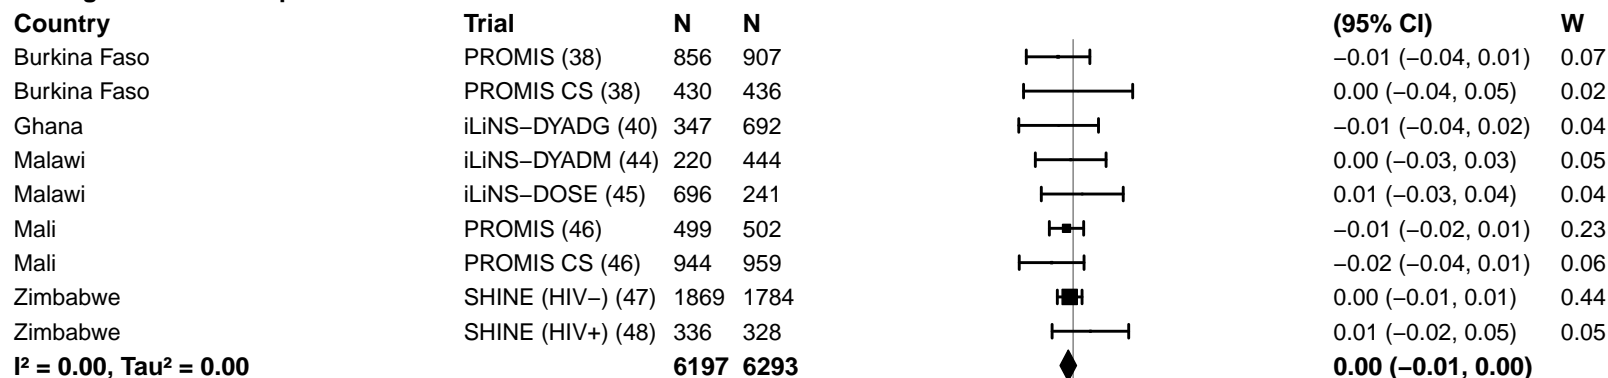

Average SQ-LNS compliance – High

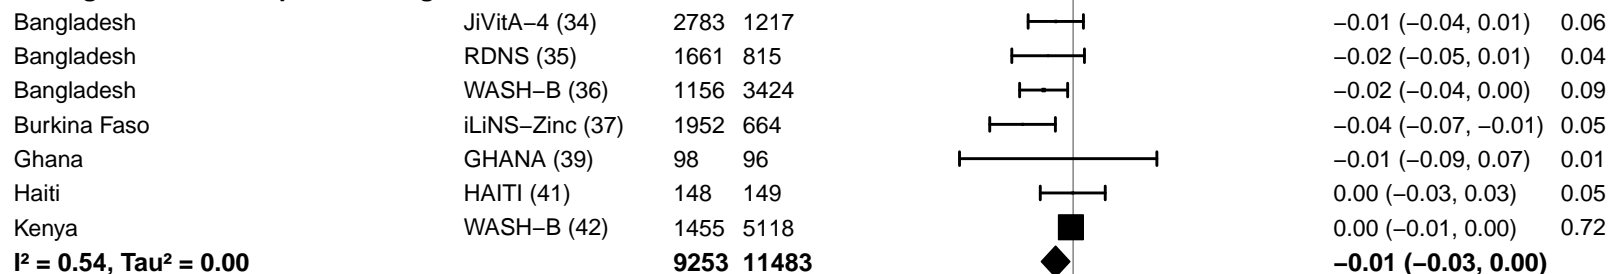

## Supplemental figure 4G: Mean difference in MUACZ

4G1: Stratified by Geographic region (insufficient comparisons)

Supplemental figure 4G: Mean difference in MUACZ

4G2: Stratified by Stunting burden

**Stunting burden**

(p-diff = 0.433)

**Stunting burden – Less than 35%**

| Country                                             | Trial            | N           | N           | MD (95% CI)              | W    |
|-----------------------------------------------------|------------------|-------------|-------------|--------------------------|------|
| Burkina Faso                                        | PROMIS (38)      | 854         | 912         | 0.09 (-0.03, 0.21)       | 0.20 |
| Burkina Faso                                        | PROMIS CS (38)   | 424         | 436         | -0.06 (-0.22, 0.10)      | 0.15 |
| Ghana                                               | GHANA (39)       |             |             |                          |      |
| Ghana                                               | iLiNS-DYADG (40) | 347         | 693         | 0.09 (-0.03, 0.20)       | 0.21 |
| Haiti                                               | HAITI (41)       |             |             |                          |      |
| Kenya                                               | WASH-B (42)      | 1461        | 5185        | 0.12 (0.05, 0.18)        | 0.29 |
| Malawi                                              | iLiNS-DYADM (44) | 220         | 444         | -0.04 (-0.20, 0.12)      | 0.15 |
| <b>I<sup>2</sup> = 0.35, Tau<sup>2</sup> = 0.00</b> |                  | <b>3306</b> | <b>7670</b> | <b>0.06 (0.00, 0.13)</b> |      |

**Stunting burden – More than 35%**

|                                                     |                   |              |             |                          |      |
|-----------------------------------------------------|-------------------|--------------|-------------|--------------------------|------|
| Bangladesh                                          | JiVitA-4 (34)     | 2897         | 1271        | 0.08 (0.03, 0.13)        | 0.15 |
| Bangladesh                                          | RDNS (35)         | 1663         | 815         | 0.04 (-0.04, 0.12)       | 0.13 |
| Bangladesh                                          | WASH-B (36)       |              |             |                          |      |
| Burkina Faso                                        | iLiNS-Zinc (37)   | 1959         | 666         | 0.30 (0.20, 0.39)        | 0.12 |
| Madagascar                                          | MAHAY (43)        | 1680         | 1658        | -0.03 (-0.16, 0.09)      | 0.09 |
| Malawi                                              | iLiNS-DOSE (45)   | 696          | 240         | 0.06 (-0.05, 0.18)       | 0.10 |
| Mali                                                | PROMIS (46)       | 507          | 505         | 0.19 (0.05, 0.32)        | 0.09 |
| Mali                                                | PROMIS CS (46)    | 954          | 970         | 0.13 (0.01, 0.25)        | 0.10 |
| Zimbabwe                                            | SHINE (HIV-) (47) | 1872         | 1780        | 0.06 (0.00, 0.12)        | 0.14 |
| Zimbabwe                                            | SHINE (HIV+) (48) | 337          | 328         | 0.04 (-0.10, 0.17)       | 0.09 |
| <b>I<sup>2</sup> = 0.72, Tau<sup>2</sup> = 0.01</b> |                   | <b>12565</b> | <b>8233</b> | <b>0.10 (0.03, 0.16)</b> |      |

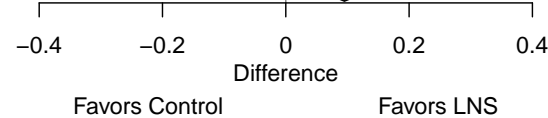

Supplemental figure 4G: Mean difference in MUACZ

4G3: Stratified by Malaria prevalence

**Malaria prevalence**

(p-diff = 0.248)

**Malaria prevalence – Less than 10%**

| Country    | Trial             | N           | N            |
|------------|-------------------|-------------|--------------|
| Bangladesh | JiVitA-4 (34)     | 2897        | 1271         |
| Bangladesh | RDNS (35)         | 1663        | 815          |
| Bangladesh | WASH-B (36)       |             |              |
| Haiti      | HAITI (41)        |             |              |
| Kenya      | WASH-B (42)       | 1461        | 5185         |
| Madagascar | MAHAY (43)        | 1680        | 1658         |
| Zimbabwe   | SHINE (HIV-) (47) | 1872        | 1780         |
| Zimbabwe   | SHINE (HIV+) (48) | 337         | 328          |
|            |                   | <b>9910</b> | <b>11037</b> |

**I<sup>2</sup> = 0.11, Tau<sup>2</sup> = 0.00**

**Malaria prevalence – At least 10%**

|              |                  |             |             |
|--------------|------------------|-------------|-------------|
| Burkina Faso | iLiNS-Zinc (37)  | 1959        | 666         |
| Burkina Faso | PROMIS (38)      | 854         | 912         |
| Burkina Faso | PROMIS CS (38)   | 424         | 436         |
| Ghana        | GHANA (39)       |             |             |
| Ghana        | iLiNS-DYADG (40) | 347         | 693         |
| Malawi       | iLiNS-DYADM (44) | 220         | 444         |
| Malawi       | iLiNS-DOSE (45)  | 696         | 240         |
| Mali         | PROMIS (46)      | 507         | 505         |
| Mali         | PROMIS CS (46)   | 954         | 970         |
|              |                  | <b>5961</b> | <b>4866</b> |

**I<sup>2</sup> = 0.71, Tau<sup>2</sup> = 0.01**

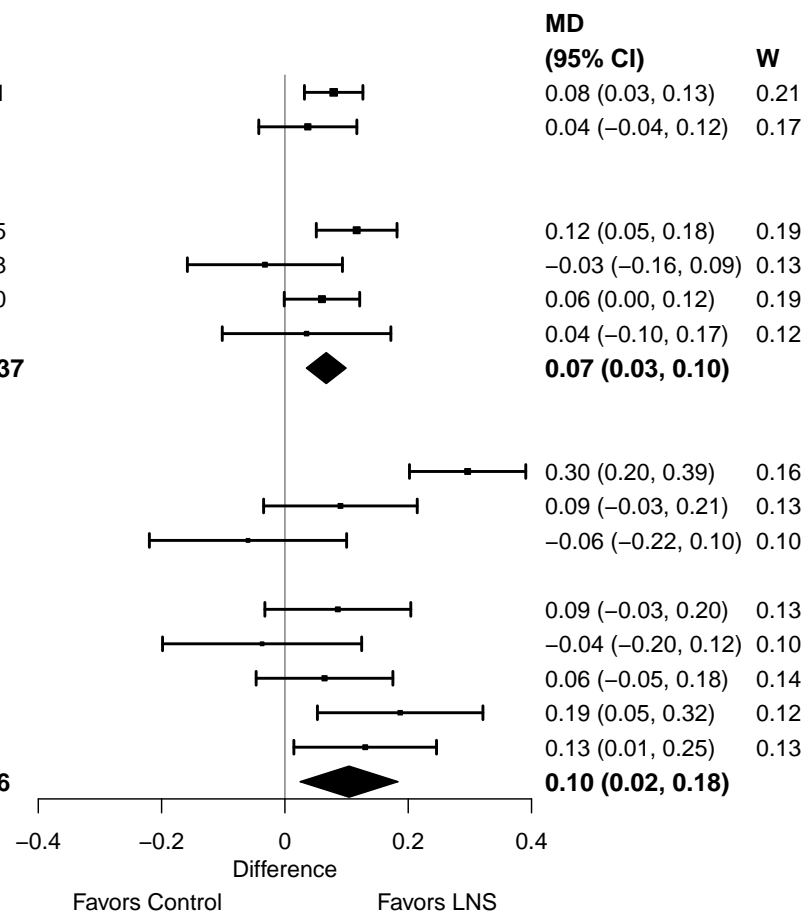

Supplemental figure 4G: Mean difference in MUACZ

4G4: Stratified by Source water quality

**Source water quality**  
(p-diff = 0.438)

**Source water quality – Improved**

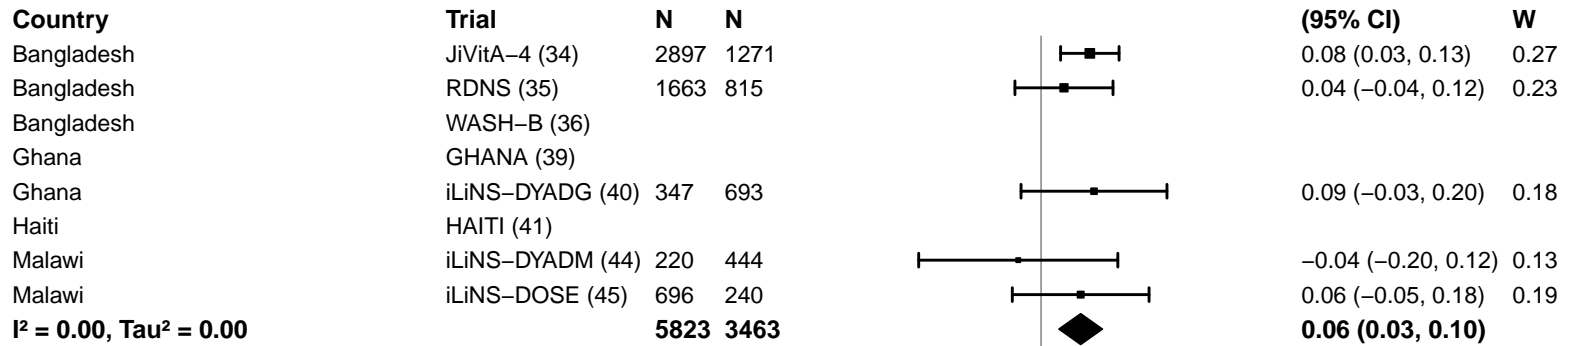

**Source water quality – Unimproved**

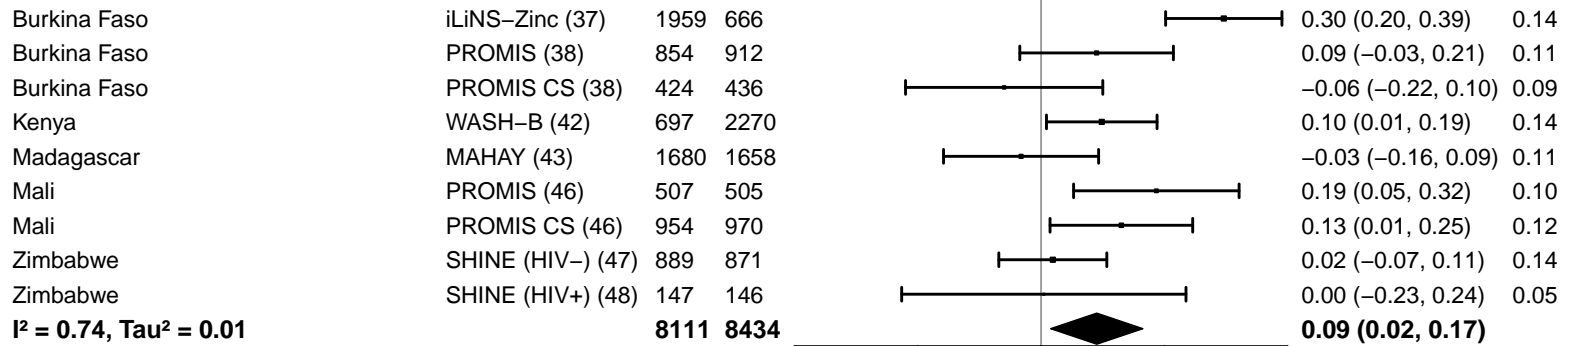



Supplemental figure 4G: Mean difference in MUACZ

4G5: Stratified by Sanitation

**Sanitation**  
(p-diff = 0.887)

**Sanitation – Improved**

| Country                                             | Trial            | N           | N           |
|-----------------------------------------------------|------------------|-------------|-------------|
| Bangladesh                                          | JiVitA-4 (34)    | 2897        | 1271        |
| Bangladesh                                          | RDNS (35)        | 1663        | 815         |
| Bangladesh                                          | WASH-B (36)      |             |             |
| Burkina Faso                                        | PROMIS (38)      | 854         | 912         |
| Burkina Faso                                        | PROMIS CS (38)   | 424         | 436         |
| Ghana                                               | GHANA (39)       |             |             |
| Ghana                                               | iLiNS-DYADG (40) | 347         | 693         |
| Haiti                                               | HAITI (41)       |             |             |
| Mali                                                | PROMIS (46)      | 507         | 505         |
| Mali                                                | PROMIS CS (46)   | 954         | 970         |
| <b>I<sup>2</sup> = 0.17, Tau<sup>2</sup> = 0.00</b> |                  | <b>7646</b> | <b>5602</b> |

**Sanitation – Unimproved**

|                                                     |                   |             |             |
|-----------------------------------------------------|-------------------|-------------|-------------|
| Burkina Faso                                        | iLiNS-Zinc (37)   | 1959        | 666         |
| Kenya                                               | WASH-B (42)       | 697         | 2270        |
| Madagascar                                          | MAHAY (43)        | 1680        | 1658        |
| Malawi                                              | iLiNS-DYADM (44)  | 220         | 444         |
| Malawi                                              | iLiNS-DOSE (45)   | 696         | 240         |
| Zimbabwe                                            | SHINE (HIV-) (47) | 889         | 871         |
| Zimbabwe                                            | SHINE (HIV+) (48) | 147         | 146         |
| <b>I<sup>2</sup> = 0.78, Tau<sup>2</sup> = 0.01</b> |                   | <b>6288</b> | <b>6295</b> |

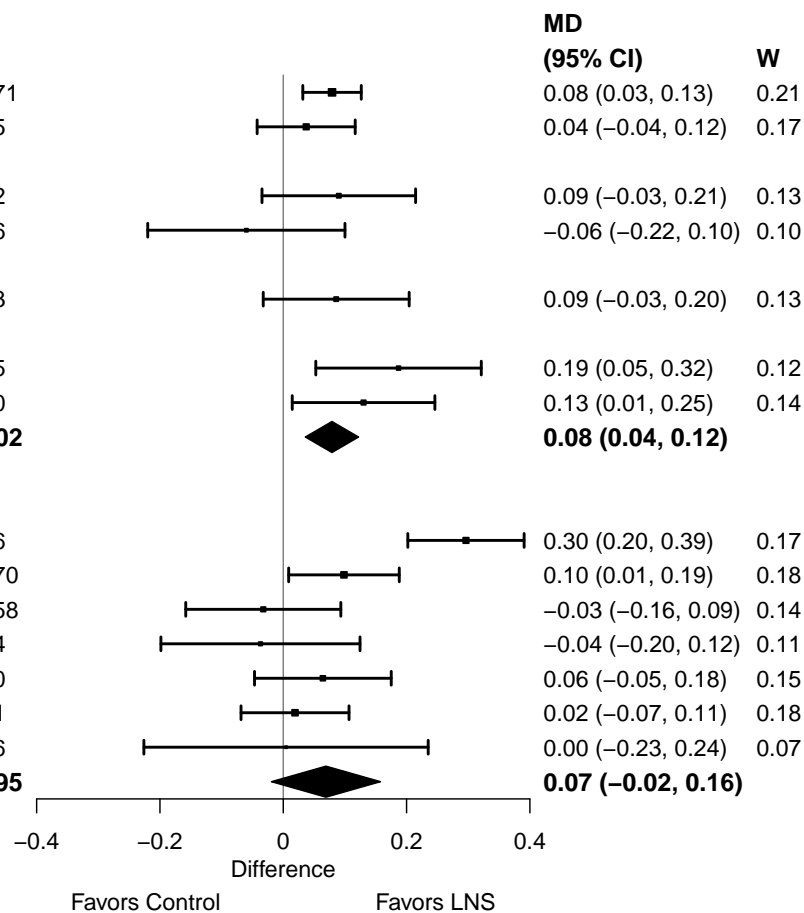

Supplemental figure 4G: Mean difference in MUACZ

4G6: Stratified by Supplement duration

**Supplement duration**

(p-diff = 0.427)

**Supplement duration – 12m or less**

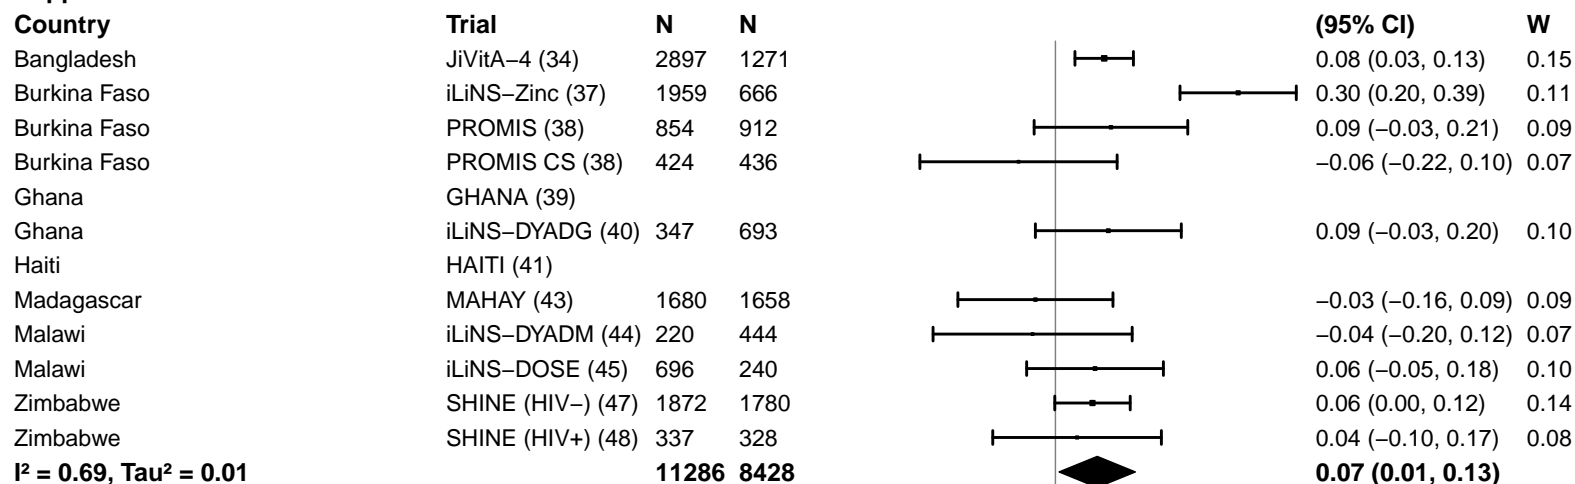

**Supplement duration – > 12m**

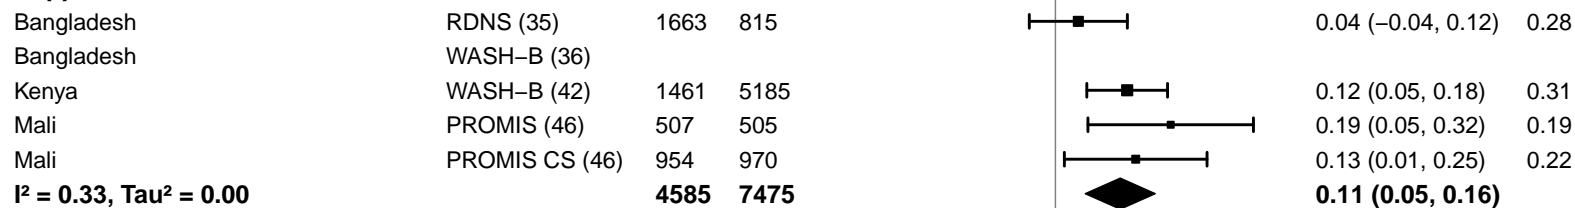

Supplemental figure 4G: Mean difference in MUACZ

4G7: Stratified by Frequency of contact

**Frequency of contact**  
(p-diff = 0.388)

**Frequency of contact – Monthly**

| Country                                             | Trial             | N           | N            | MD (95% CI)              | W    |
|-----------------------------------------------------|-------------------|-------------|--------------|--------------------------|------|
| Bangladesh                                          | RDNS (35)         | 1663        | 815          | 0.04 (-0.04, 0.12)       | 0.14 |
| Burkina Faso                                        | PROMIS (38)       | 854         | 912          | 0.09 (-0.03, 0.21)       | 0.10 |
| Burkina Faso                                        | PROMIS CS (38)    | 424         | 436          | -0.06 (-0.22, 0.10)      | 0.08 |
| Haiti                                               | HAITI (41)        |             |              |                          |      |
| Kenya                                               | WASH-B (42)       | 1461        | 5185         | 0.12 (0.05, 0.18)        | 0.15 |
| Madagascar                                          | MAHAY (43)        | 1680        | 1658         | -0.03 (-0.16, 0.09)      | 0.10 |
| Mali                                                | PROMIS (46)       | 507         | 505          | 0.19 (0.05, 0.32)        | 0.09 |
| Mali                                                | PROMIS CS (46)    | 954         | 970          | 0.13 (0.01, 0.25)        | 0.11 |
| Zimbabwe                                            | SHINE (HIV-) (47) | 1872        | 1780         | 0.06 (0.00, 0.12)        | 0.15 |
| Zimbabwe                                            | SHINE (HIV+) (48) | 337         | 328          | 0.04 (-0.10, 0.17)       | 0.09 |
| <b>I<sup>2</sup> = 0.34, Tau<sup>2</sup> = 0.00</b> |                   | <b>9752</b> | <b>12589</b> | <b>0.07 (0.03, 0.11)</b> |      |

**Frequency of contact – Weekly**

|                                                     |                  |             |             |                          |      |
|-----------------------------------------------------|------------------|-------------|-------------|--------------------------|------|
| Bangladesh                                          | JiVitA-4 (34)    | 2897        | 1271        | 0.08 (0.03, 0.13)        | 0.28 |
| Bangladesh                                          | WASH-B (36)      |             |             |                          |      |
| Burkina Faso                                        | iLiNS-Zinc (37)  | 1959        | 666         | 0.30 (0.20, 0.39)        | 0.21 |
| Ghana                                               | GHANA (39)       |             |             |                          |      |
| Ghana                                               | iLiNS-DYADG (40) | 347         | 693         | 0.09 (-0.03, 0.20)       | 0.18 |
| Malawi                                              | iLiNS-DYADM (44) | 220         | 444         | -0.04 (-0.20, 0.12)      | 0.13 |
| Malawi                                              | iLiNS-DOSE (45)  | 696         | 240         | 0.06 (-0.05, 0.18)       | 0.19 |
| <b>I<sup>2</sup> = 0.81, Tau<sup>2</sup> = 0.01</b> |                  | <b>6119</b> | <b>3314</b> | <b>0.10 (0.00, 0.21)</b> |      |

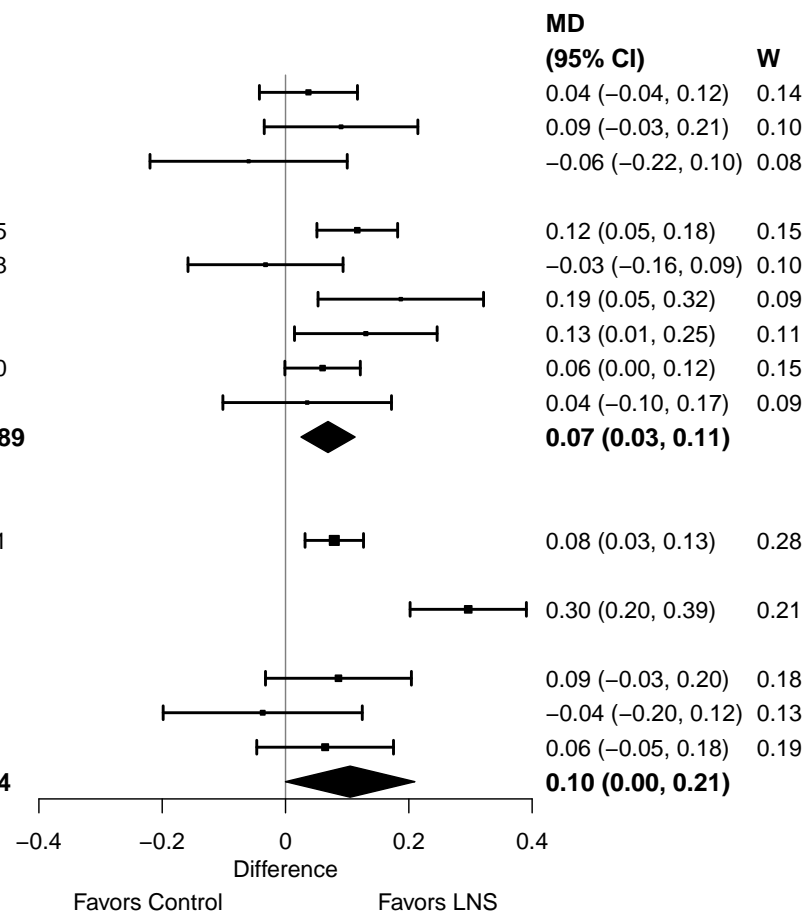

Supplemental figure 4G: Mean difference in MUACZ

4G8: Stratified by Average SQ-LNS compliance

**Average SQ-LNS compliance**  
(p-diff = 0.228)

**Average SQ-LNS compliance – Low**

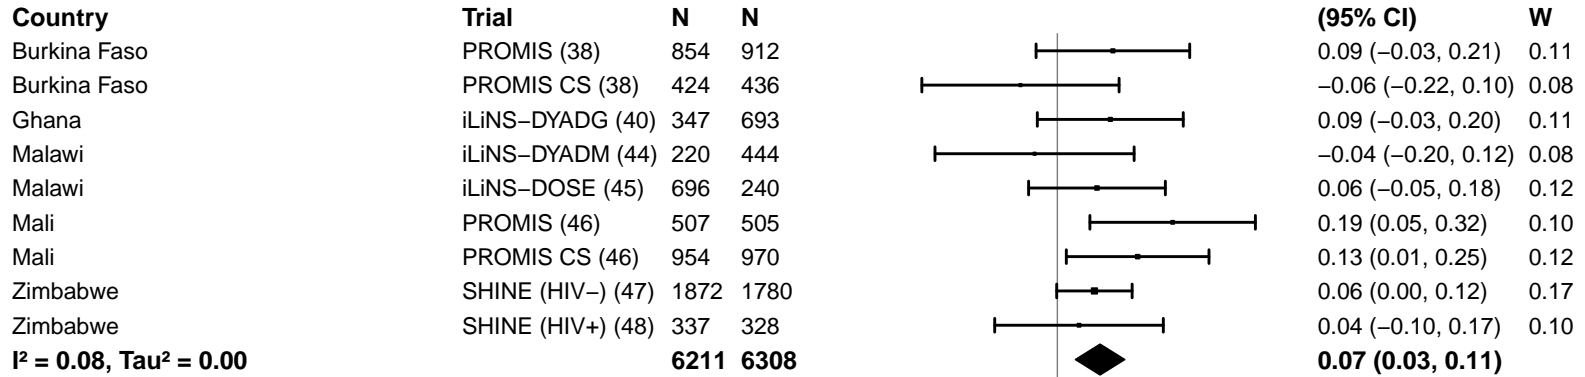

**Average SQ-LNS compliance – High**

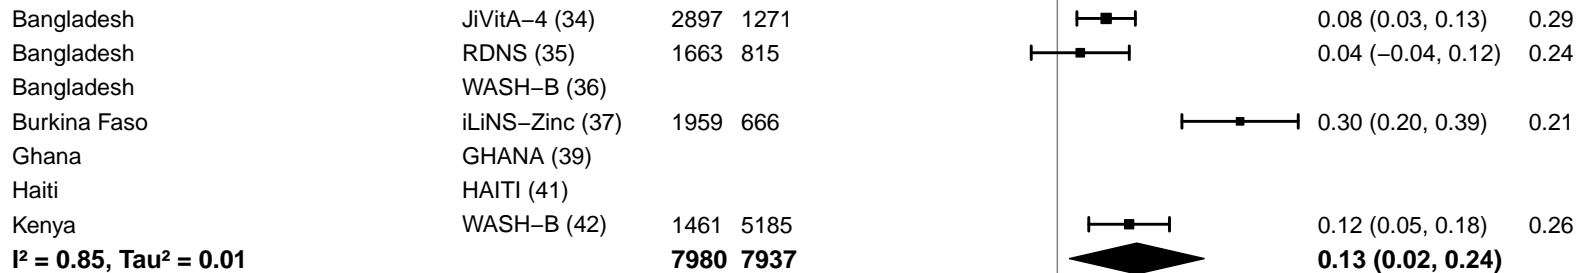

**Supplemental figure 4H: Low MUAC prevalence ratio**

**4H1: Stratified by Geographic region (insufficient comparisons)**

Supplemental figure 4H: Low MUAC prevalence ratio

4H2: Stratified by Stunting burden

**Stunting burden**

(p-diff = 0.925)

**Stunting burden – Less than 35%**

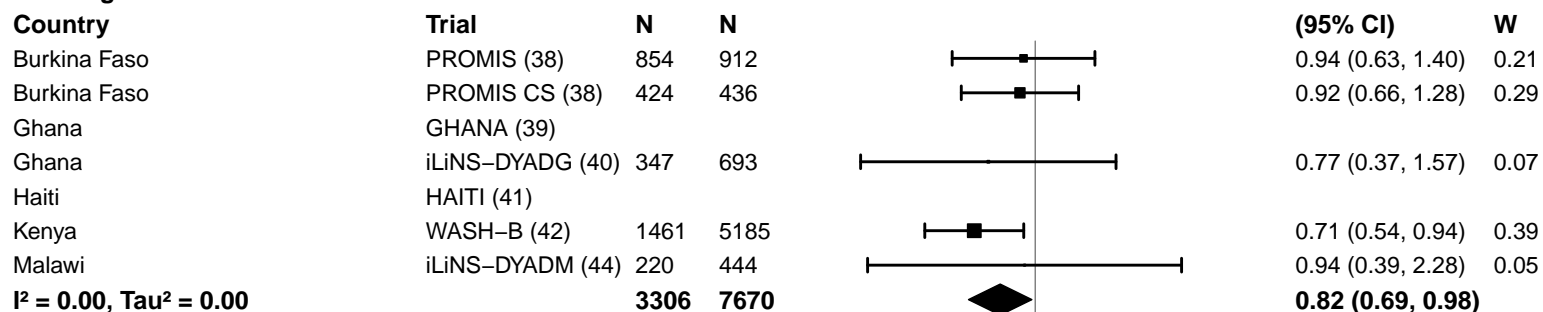

**Stunting burden – More than 35%**

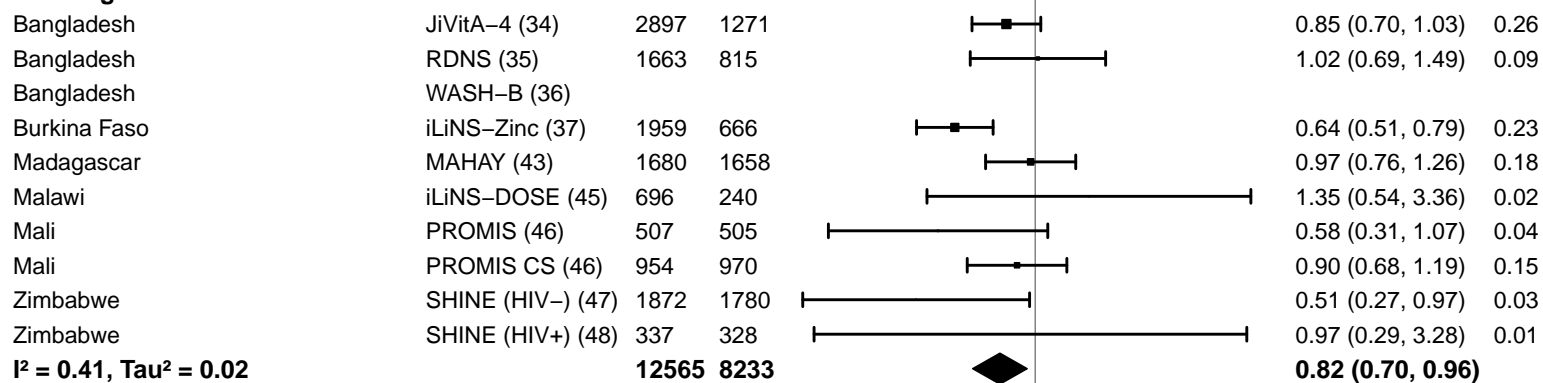

Supplemental figure 4H: Low MUAC prevalence ratio

4H3: Stratified by Malaria prevalence

**Malaria prevalence**

(p-diff = 0.684)

**Malaria prevalence – Less than 10%**

| Country    | Trial             | N           | N            | PR<br>(95% CI)           | W    |
|------------|-------------------|-------------|--------------|--------------------------|------|
| Bangladesh | JiVitA-4 (34)     | 2897        | 1271         | 0.85 (0.70, 1.03)        | 0.36 |
| Bangladesh | RDNS (35)         | 1663        | 815          | 1.02 (0.69, 1.49)        | 0.12 |
| Bangladesh | WASH-B (36)       |             |              |                          |      |
| Haiti      | HAITI (41)        |             |              |                          |      |
| Kenya      | WASH-B (42)       | 1461        | 5185         | 0.71 (0.54, 0.94)        | 0.21 |
| Madagascar | MAHAY (43)        | 1680        | 1658         | 0.97 (0.76, 1.26)        | 0.24 |
| Zimbabwe   | SHINE (HIV-) (47) | 1872        | 1780         | 0.51 (0.27, 0.97)        | 0.05 |
| Zimbabwe   | SHINE (HIV+) (48) | 337         | 328          | 0.97 (0.29, 3.28)        | 0.01 |
|            |                   | <b>9910</b> | <b>11037</b> | <b>0.84 (0.73, 0.98)</b> |      |

**I<sup>2</sup> = 0.17, Tau<sup>2</sup> = 0.01**

**Malaria prevalence – At least 10%**

|              |                  |             |             |                          |      |
|--------------|------------------|-------------|-------------|--------------------------|------|
| Burkina Faso | iLiNS-Zinc (37)  | 1959        | 666         | 0.64 (0.51, 0.79)        | 0.34 |
| Burkina Faso | PROMIS (38)      | 854         | 912         | 0.94 (0.63, 1.40)        | 0.12 |
| Burkina Faso | PROMIS CS (38)   | 424         | 436         | 0.92 (0.66, 1.28)        | 0.17 |
| Ghana        | GHANA (39)       |             |             |                          |      |
| Ghana        | iLiNS-DYADG (40) | 347         | 693         | 0.77 (0.37, 1.57)        | 0.04 |
| Malawi       | iLiNS-DYADM (44) | 220         | 444         | 0.94 (0.39, 2.28)        | 0.03 |
| Malawi       | iLiNS-DOSE (45)  | 696         | 240         | 1.35 (0.54, 3.36)        | 0.03 |
| Mali         | PROMIS (46)      | 507         | 505         | 0.58 (0.31, 1.07)        | 0.05 |
| Mali         | PROMIS CS (46)   | 954         | 970         | 0.90 (0.68, 1.19)        | 0.22 |
|              |                  | <b>5961</b> | <b>4866</b> | <b>0.79 (0.68, 0.92)</b> |      |

**I<sup>2</sup> = 0.19, Tau<sup>2</sup> = 0.01**

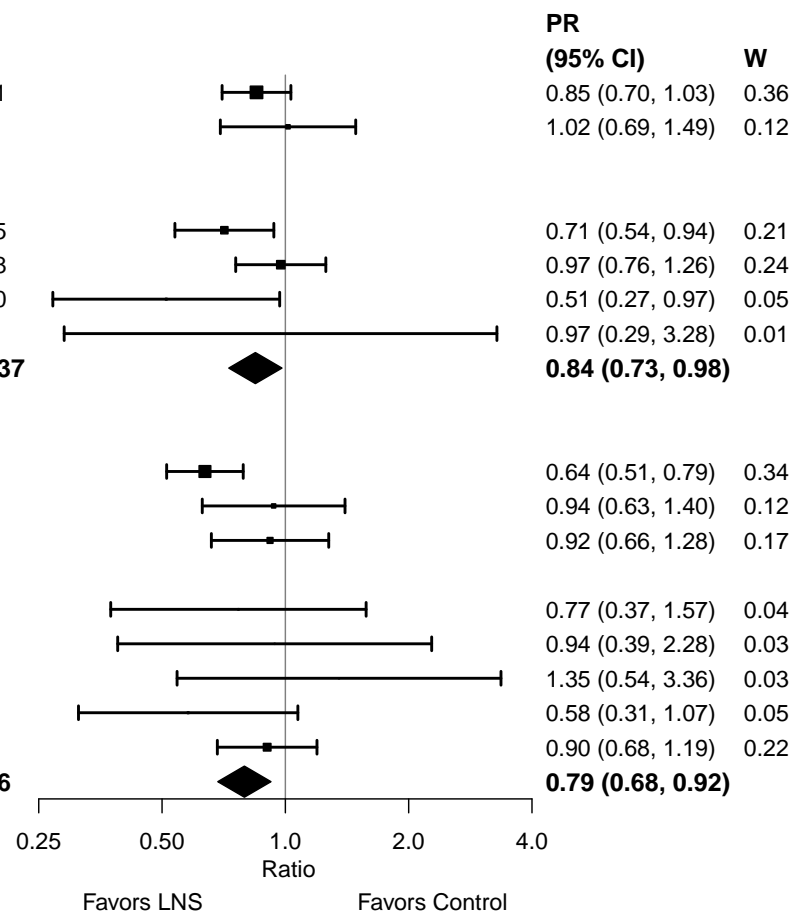

Supplemental figure 4H: Low MUAC prevalence ratio

4H4: Stratified by Source water quality

**Source water quality**

(p-diff = 0.367)

**Source water quality – Improved**

| Country                                             | Trial            | N           | N           | PR<br>(95% CI)           | W    |
|-----------------------------------------------------|------------------|-------------|-------------|--------------------------|------|
| Bangladesh                                          | JiVitA-4 (34)    | 2897        | 1271        | 0.85 (0.70, 1.03)        | 0.69 |
| Bangladesh                                          | RDNS (35)        | 1663        | 815         | 1.02 (0.69, 1.49)        | 0.19 |
| Bangladesh                                          | WASH-B (36)      |             |             |                          |      |
| Ghana                                               | GHANA (39)       |             |             |                          |      |
| Ghana                                               | iLiNS-DYADG (40) | 347         | 693         | 0.77 (0.37, 1.57)        | 0.05 |
| Haiti                                               | HAITI (41)       |             |             |                          |      |
| Malawi                                              | iLiNS-DYADM (44) | 220         | 444         | 0.94 (0.39, 2.28)        | 0.03 |
| Malawi                                              | iLiNS-DOSE (45)  | 696         | 240         | 1.35 (0.54, 3.36)        | 0.03 |
| <b>I<sup>2</sup> = 0.00, Tau<sup>2</sup> = 0.00</b> |                  | <b>5823</b> | <b>3463</b> | <b>0.89 (0.76, 1.05)</b> |      |

**Source water quality – Unimproved**

|                                                     |                   |             |             |                          |      |
|-----------------------------------------------------|-------------------|-------------|-------------|--------------------------|------|
| Burkina Faso                                        | iLiNS-Zinc (37)   | 1959        | 666         | 0.64 (0.51, 0.79)        | 0.29 |
| Burkina Faso                                        | PROMIS (38)       | 854         | 912         | 0.94 (0.63, 1.40)        | 0.09 |
| Burkina Faso                                        | PROMIS CS (38)    | 424         | 436         | 0.92 (0.66, 1.28)        | 0.13 |
| Kenya                                               | WASH-B (42)       | 697         | 2270        | 0.67 (0.41, 1.10)        | 0.06 |
| Madagascar                                          | MAHAY (43)        | 1680        | 1658        | 0.97 (0.76, 1.26)        | 0.21 |
| Mali                                                | PROMIS (46)       | 507         | 505         | 0.58 (0.31, 1.07)        | 0.04 |
| Mali                                                | PROMIS CS (46)    | 954         | 970         | 0.90 (0.68, 1.19)        | 0.17 |
| Zimbabwe                                            | SHINE (HIV-) (47) | 889         | 871         | 0.65 (0.25, 1.68)        | 0.02 |
| Zimbabwe                                            | SHINE (HIV+) (48) | 147         | 146         | 0.50 (0.05, 5.43)        | 0.00 |
| <b>I<sup>2</sup> = 0.24, Tau<sup>2</sup> = 0.01</b> |                   | <b>8111</b> | <b>8434</b> | <b>0.80 (0.70, 0.92)</b> |      |

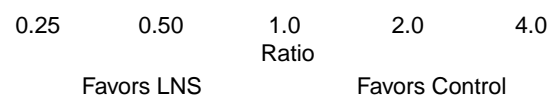



Supplemental figure 4H: Low MUAC prevalence ratio

4H5: Stratified by Sanitation

**Sanitation**  
(p-diff = 0.291)

**Sanitation – Improved**

| Country                                             | Trial            | N           | N           | PR (95% CI)              | W    |
|-----------------------------------------------------|------------------|-------------|-------------|--------------------------|------|
| Bangladesh                                          | JiVitA-4 (34)    | 2897        | 1271        | 0.85 (0.70, 1.03)        | 0.40 |
| Bangladesh                                          | RDNS (35)        | 1663        | 815         | 1.02 (0.69, 1.49)        | 0.11 |
| Bangladesh                                          | WASH-B (36)      |             |             |                          |      |
| Burkina Faso                                        | PROMIS (38)      | 854         | 912         | 0.94 (0.63, 1.40)        | 0.10 |
| Burkina Faso                                        | PROMIS CS (38)   | 424         | 436         | 0.92 (0.66, 1.28)        | 0.14 |
| Ghana                                               | GHANA (39)       |             |             |                          |      |
| Ghana                                               | iLiNS-DYADG (40) | 347         | 693         | 0.77 (0.37, 1.57)        | 0.03 |
| Haiti                                               | HAITI (41)       |             |             |                          |      |
| Mali                                                | PROMIS (46)      | 507         | 505         | 0.58 (0.31, 1.07)        | 0.04 |
| Mali                                                | PROMIS CS (46)   | 954         | 970         | 0.90 (0.68, 1.19)        | 0.19 |
| <b>I<sup>2</sup> = 0.00, Tau<sup>2</sup> = 0.00</b> |                  | <b>7646</b> | <b>5602</b> | <b>0.88 (0.78, 0.99)</b> |      |

**Sanitation – Unimproved**

|                                                     |                   |             |             |                          |      |
|-----------------------------------------------------|-------------------|-------------|-------------|--------------------------|------|
| Burkina Faso                                        | iLiNS-Zinc (37)   | 1959        | 666         | 0.64 (0.51, 0.79)        | 0.47 |
| Kenya                                               | WASH-B (42)       | 697         | 2270        | 0.67 (0.41, 1.10)        | 0.09 |
| Madagascar                                          | MAHAY (43)        | 1680        | 1658        | 0.97 (0.76, 1.26)        | 0.35 |
| Malawi                                              | iLiNS-DYADM (44)  | 220         | 444         | 0.94 (0.39, 2.28)        | 0.03 |
| Malawi                                              | iLiNS-DOSE (45)   | 696         | 240         | 1.35 (0.54, 3.36)        | 0.03 |
| Zimbabwe                                            | SHINE (HIV-) (47) | 889         | 871         | 0.65 (0.25, 1.68)        | 0.03 |
| Zimbabwe                                            | SHINE (HIV+) (48) | 147         | 146         | 0.50 (0.05, 5.43)        | 0.00 |
| <b>I<sup>2</sup> = 0.30, Tau<sup>2</sup> = 0.01</b> |                   | <b>6288</b> | <b>6295</b> | <b>0.77 (0.65, 0.93)</b> |      |

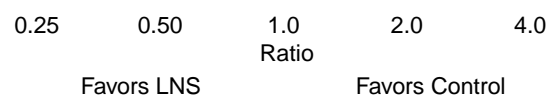

Supplemental figure 4H: Low MUAC prevalence ratio

4H6: Stratified by Supplement duration

**Supplement duration**  
(p-diff = 0.928)

**Supplement duration – 12m or less**

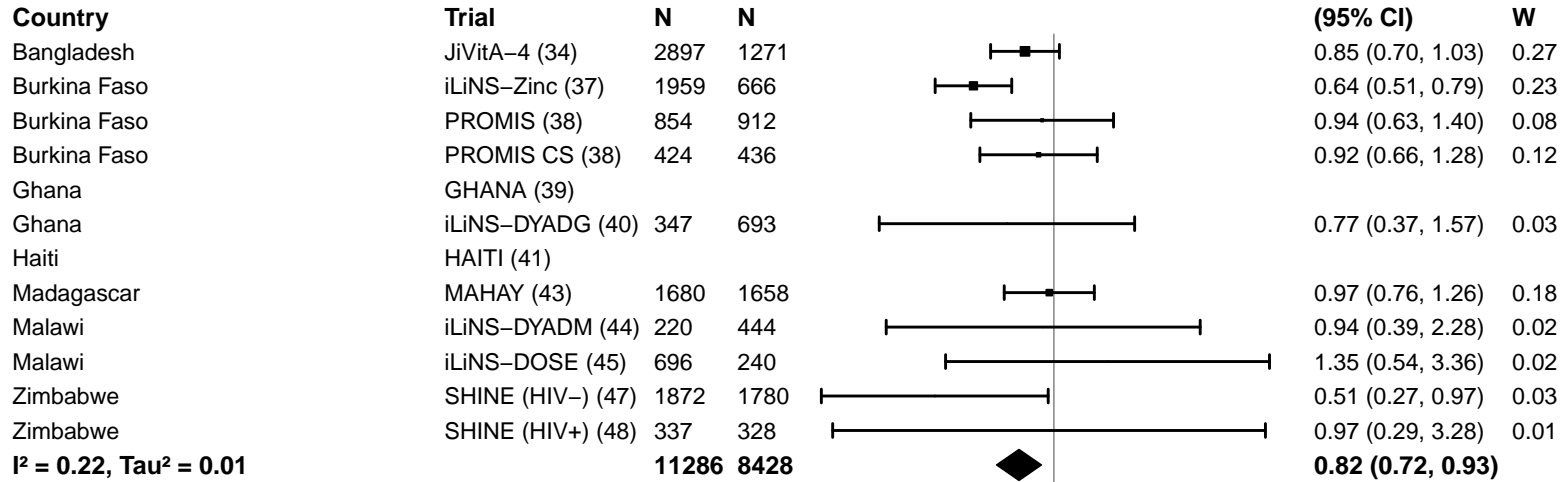

**Supplement duration – > 12m**

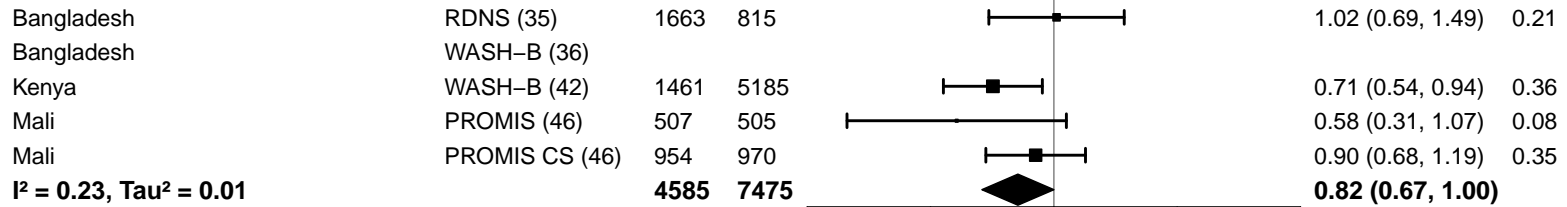

Supplemental figure 4H: Low MUAC prevalence ratio

4H7: Stratified by Frequency of contact

Frequency of contact

(p-diff = 0.354)

Frequency of contact – Monthly

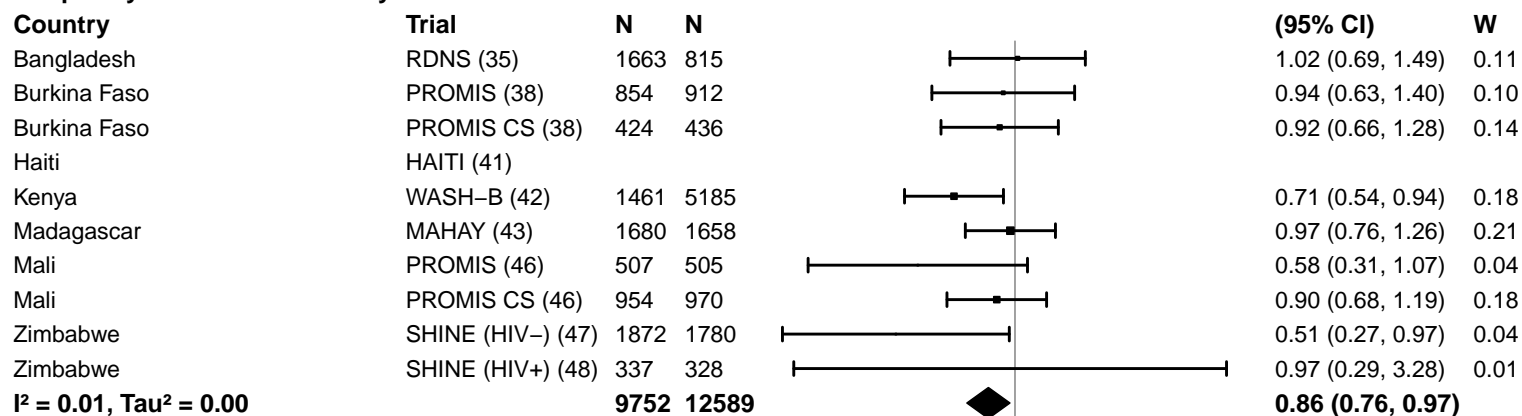

Frequency of contact – Weekly

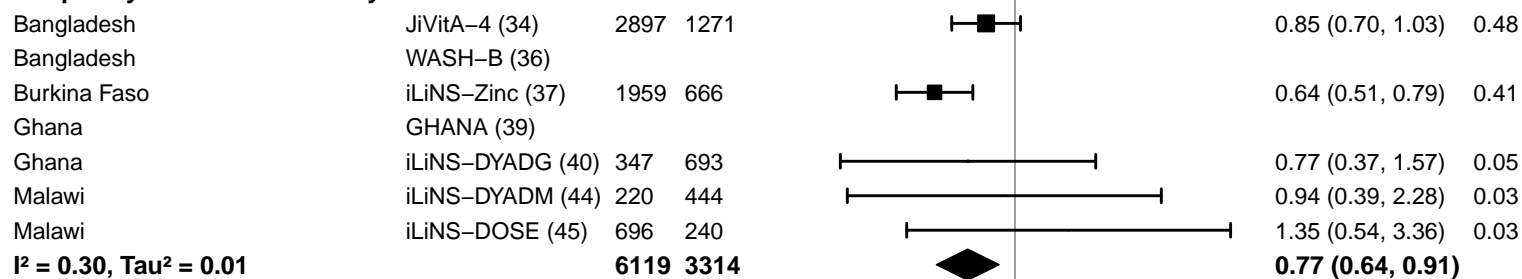

0.25 0.50 1.0 2.0 4.0  
Ratio  
Favors LNS Favors Control

Supplemental figure 4H: Low MUAC prevalence ratio

4H8: Stratified by Average SQ-LNS compliance

**Average SQ-LNS compliance**  
(p-diff = 0.377)

**Average SQ-LNS compliance – Low**

| Country                                             | Trial             | N           | N           | PR (95% CI)              | W    |
|-----------------------------------------------------|-------------------|-------------|-------------|--------------------------|------|
| Burkina Faso                                        | PROMIS (38)       | 854         | 912         | 0.94 (0.63, 1.40)        | 0.16 |
| Burkina Faso                                        | PROMIS CS (38)    | 424         | 436         | 0.92 (0.66, 1.28)        | 0.24 |
| Ghana                                               | iLiNS-DYADG (40)  | 347         | 693         | 0.77 (0.37, 1.57)        | 0.05 |
| Malawi                                              | iLiNS-DYADM (44)  | 220         | 444         | 0.94 (0.39, 2.28)        | 0.04 |
| Malawi                                              | iLiNS-DOSE (45)   | 696         | 240         | 1.35 (0.54, 3.36)        | 0.03 |
| Mali                                                | PROMIS (46)       | 507         | 505         | 0.58 (0.31, 1.07)        | 0.07 |
| Mali                                                | PROMIS CS (46)    | 954         | 970         | 0.90 (0.68, 1.19)        | 0.32 |
| Zimbabwe                                            | SHINE (HIV-) (47) | 1872        | 1780        | 0.51 (0.27, 0.97)        | 0.07 |
| Zimbabwe                                            | SHINE (HIV+) (48) | 337         | 328         | 0.97 (0.29, 3.28)        | 0.02 |
| <b>I<sup>2</sup> = 0.00, Tau<sup>2</sup> = 0.00</b> |                   | <b>6211</b> | <b>6308</b> | <b>0.86 (0.73, 1.01)</b> |      |

**Average SQ-LNS compliance – High**

|                                                     |                 |             |             |                          |      |
|-----------------------------------------------------|-----------------|-------------|-------------|--------------------------|------|
| Bangladesh                                          | JiVitA-4 (34)   | 2897        | 1271        | 0.85 (0.70, 1.03)        | 0.37 |
| Bangladesh                                          | RDNS (35)       | 1663        | 815         | 1.02 (0.69, 1.49)        | 0.11 |
| Bangladesh                                          | WASH-B (36)     |             |             |                          |      |
| Burkina Faso                                        | iLiNS-Zinc (37) | 1959        | 666         | 0.64 (0.51, 0.79)        | 0.31 |
| Ghana                                               | GHANA (39)      |             |             |                          |      |
| Haiti                                               | HAITI (41)      |             |             |                          |      |
| Kenya                                               | WASH-B (42)     | 1461        | 5185        | 0.71 (0.54, 0.94)        | 0.20 |
| <b>I<sup>2</sup> = 0.53, Tau<sup>2</sup> = 0.02</b> |                 | <b>7980</b> | <b>7937</b> | <b>0.77 (0.64, 0.93)</b> |      |

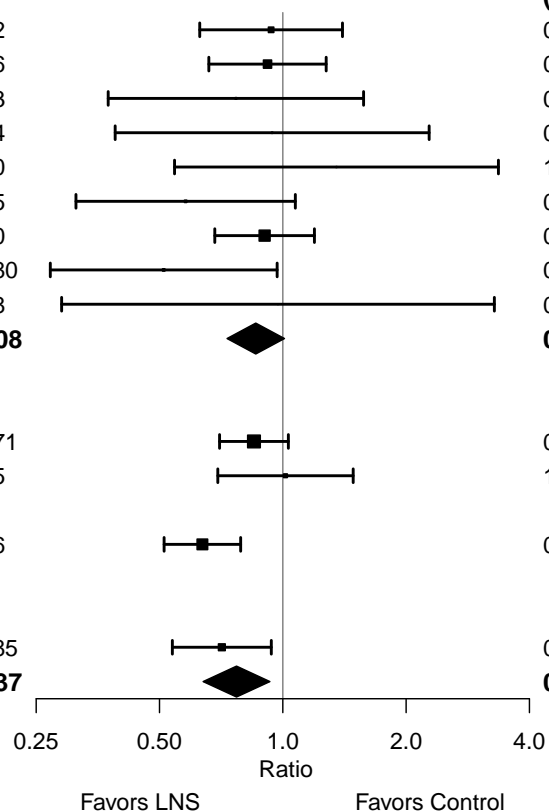

## Supplemental figure 4I: Low MUAC prevalence difference

4I1: Stratified by Geographic region (insufficient comparisons)

Supplemental figure 4I: Low MUAC prevalence difference

4I2: Stratified by Stunting burden

**Stunting burden**

(p-diff = 0.829)

**Stunting burden – Less than 35%**

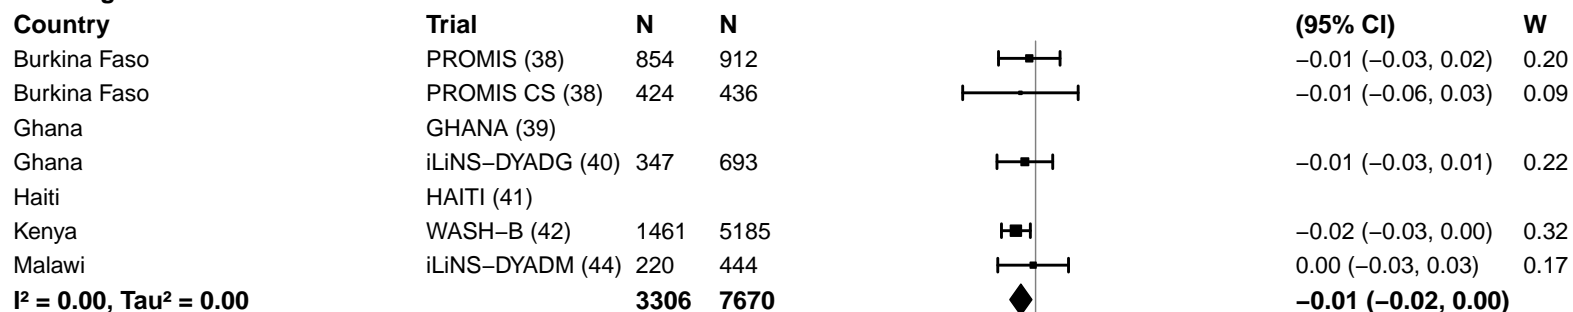

**Stunting burden – More than 35%**

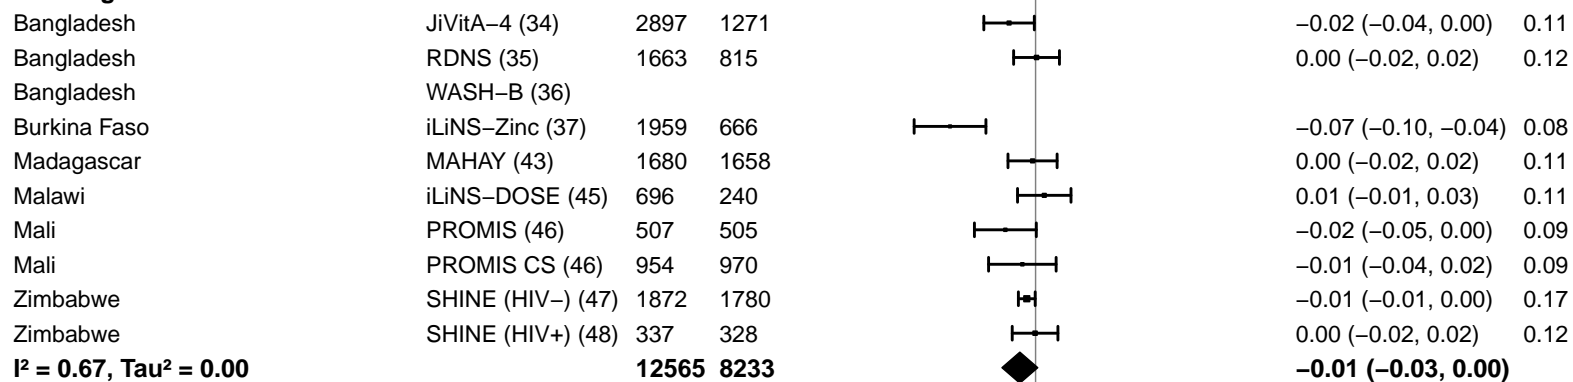

-0.2 -0.1 0 0.1 0.2  
Difference  
Favors LNS Favors Control

Supplemental figure 4I: Low MUAC prevalence difference

4I3: Stratified by Malaria prevalence

**Malaria prevalence**

(p-diff = 0.447)

**Malaria prevalence – Less than 10%**

| Country                                             | Trial             | N           | N            |  | PD<br>(95% CI)             | W    |
|-----------------------------------------------------|-------------------|-------------|--------------|--|----------------------------|------|
| Bangladesh                                          | JiVitA-4 (34)     | 2897        | 1271         |  | -0.02 (-0.04, 0.00)        | 0.14 |
| Bangladesh                                          | RDNS (35)         | 1663        | 815          |  | 0.00 (-0.02, 0.02)         | 0.15 |
| Bangladesh                                          | WASH-B (36)       |             |              |  |                            |      |
| Haiti                                               | HAITI (41)        |             |              |  |                            |      |
| Kenya                                               | WASH-B (42)       | 1461        | 5185         |  | -0.02 (-0.03, 0.00)        | 0.19 |
| Madagascar                                          | MAHAY (43)        | 1680        | 1658         |  | 0.00 (-0.02, 0.02)         | 0.15 |
| Zimbabwe                                            | SHINE (HIV-) (47) | 1872        | 1780         |  | -0.01 (-0.01, 0.00)        | 0.22 |
| Zimbabwe                                            | SHINE (HIV+) (48) | 337         | 328          |  | 0.00 (-0.02, 0.02)         | 0.15 |
| <b>I<sup>2</sup> = 0.06, Tau<sup>2</sup> = 0.00</b> |                   | <b>9910</b> | <b>11037</b> |  | <b>-0.01 (-0.01, 0.00)</b> |      |

**Malaria prevalence – At least 10%**

|                                                     |                  |             |             |  |                            |      |
|-----------------------------------------------------|------------------|-------------|-------------|--|----------------------------|------|
| Burkina Faso                                        | iLiNS-Zinc (37)  | 1959        | 666         |  | -0.07 (-0.10, -0.04)       | 0.12 |
| Burkina Faso                                        | PROMIS (38)      | 854         | 912         |  | -0.01 (-0.03, 0.02)        | 0.14 |
| Burkina Faso                                        | PROMIS CS (38)   | 424         | 436         |  | -0.01 (-0.06, 0.03)        | 0.06 |
| Ghana                                               | GHANA (39)       |             |             |  |                            |      |
| Ghana                                               | iLiNS-DYADG (40) | 347         | 693         |  | -0.01 (-0.03, 0.01)        | 0.15 |
| Malawi                                              | iLiNS-DYADM (44) | 220         | 444         |  | 0.00 (-0.03, 0.03)         | 0.12 |
| Malawi                                              | iLiNS-DOSE (45)  | 696         | 240         |  | 0.01 (-0.01, 0.03)         | 0.16 |
| Mali                                                | PROMIS (46)      | 507         | 505         |  | -0.02 (-0.05, 0.00)        | 0.14 |
| Mali                                                | PROMIS CS (46)   | 954         | 970         |  | -0.01 (-0.04, 0.02)        | 0.12 |
| <b>I<sup>2</sup> = 0.64, Tau<sup>2</sup> = 0.00</b> |                  | <b>5961</b> | <b>4866</b> |  | <b>-0.02 (-0.03, 0.00)</b> |      |

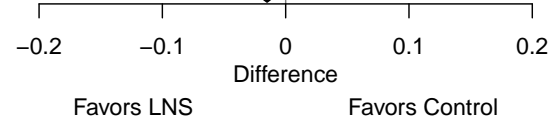

Supplemental figure 4I: Low MUAC prevalence difference

4I4: Stratified by Source water quality

**Source water quality**

(p-diff = 0.262)

**Source water quality – Improved**

| Country                                             | Trial            | N           | N           |  | PD<br>(95% CI)             | W    |
|-----------------------------------------------------|------------------|-------------|-------------|--|----------------------------|------|
| Bangladesh                                          | JiVitA-4 (34)    | 2897        | 1271        |  | -0.02 (-0.04, 0.00)        | 0.22 |
| Bangladesh                                          | RDNS (35)        | 1663        | 815         |  | 0.00 (-0.02, 0.02)         | 0.23 |
| Bangladesh                                          | WASH-B (36)      |             |             |  |                            |      |
| Ghana                                               | GHANA (39)       |             |             |  |                            |      |
| Ghana                                               | iLiNS-DYADG (40) | 347         | 693         |  | -0.01 (-0.03, 0.01)        | 0.20 |
| Haiti                                               | HAITI (41)       |             |             |  |                            |      |
| Malawi                                              | iLiNS-DYADM (44) | 220         | 444         |  | 0.00 (-0.03, 0.03)         | 0.15 |
| Malawi                                              | iLiNS-DOSE (45)  | 696         | 240         |  | 0.01 (-0.01, 0.03)         | 0.20 |
| <b>I<sup>2</sup> = 0.05, Tau<sup>2</sup> = 0.00</b> |                  | <b>5823</b> | <b>3463</b> |  | <b>-0.01 (-0.01, 0.00)</b> |      |

**Source water quality – Unimproved**

|                                                     |                   |             |             |  |                            |      |
|-----------------------------------------------------|-------------------|-------------|-------------|--|----------------------------|------|
| Burkina Faso                                        | iLiNS-Zinc (37)   | 1959        | 666         |  | -0.07 (-0.10, -0.04)       | 0.08 |
| Burkina Faso                                        | PROMIS (38)       | 854         | 912         |  | -0.01 (-0.03, 0.02)        | 0.10 |
| Burkina Faso                                        | PROMIS CS (38)    | 424         | 436         |  | -0.01 (-0.06, 0.03)        | 0.04 |
| Kenya                                               | WASH-B (42)       | 697         | 2270        |  | -0.02 (-0.04, 0.00)        | 0.15 |
| Madagascar                                          | MAHAY (43)        | 1680        | 1658        |  | 0.00 (-0.02, 0.02)         | 0.13 |
| Mali                                                | PROMIS (46)       | 507         | 505         |  | -0.02 (-0.05, 0.00)        | 0.10 |
| Mali                                                | PROMIS CS (46)    | 954         | 970         |  | -0.01 (-0.04, 0.02)        | 0.09 |
| Zimbabwe                                            | SHINE (HIV-) (47) | 889         | 871         |  | 0.00 (-0.01, 0.01)         | 0.19 |
| Zimbabwe                                            | SHINE (HIV+) (48) | 147         | 146         |  | -0.01 (-0.03, 0.02)        | 0.11 |
| <b>I<sup>2</sup> = 0.60, Tau<sup>2</sup> = 0.00</b> |                   | <b>8111</b> | <b>8434</b> |  | <b>-0.02 (-0.03, 0.00)</b> |      |

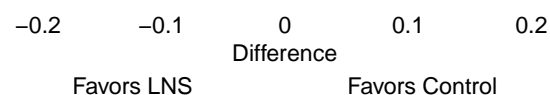



Supplemental figure 4I: Low MUAC prevalence difference

4I5: Stratified by Sanitation

**Sanitation**  
(p-diff = 0.982)

**Sanitation – Improved**

| Country                                             | Trial            | N           | N           |
|-----------------------------------------------------|------------------|-------------|-------------|
| Bangladesh                                          | JiVitA-4 (34)    | 2897        | 1271        |
| Bangladesh                                          | RDNS (35)        | 1663        | 815         |
| Bangladesh                                          | WASH-B (36)      |             |             |
| Burkina Faso                                        | PROMIS (38)      | 854         | 912         |
| Burkina Faso                                        | PROMIS CS (38)   | 424         | 436         |
| Ghana                                               | GHANA (39)       |             |             |
| Ghana                                               | iLiNS-DYADG (40) | 347         | 693         |
| Haiti                                               | HAITI (41)       |             |             |
| Mali                                                | PROMIS (46)      | 507         | 505         |
| Mali                                                | PROMIS CS (46)   | 954         | 970         |
| <b>I<sup>2</sup> = 0.00, Tau<sup>2</sup> = 0.00</b> |                  | <b>7646</b> | <b>5602</b> |

**Sanitation – Unimproved**

|                                                     |                   |             |             |
|-----------------------------------------------------|-------------------|-------------|-------------|
| Burkina Faso                                        | iLiNS-Zinc (37)   | 1959        | 666         |
| Kenya                                               | WASH-B (42)       | 697         | 2270        |
| Madagascar                                          | MAHAY (43)        | 1680        | 1658        |
| Malawi                                              | iLiNS-DYADM (44)  | 220         | 444         |
| Malawi                                              | iLiNS-DOSE (45)   | 696         | 240         |
| Zimbabwe                                            | SHINE (HIV-) (47) | 889         | 871         |
| Zimbabwe                                            | SHINE (HIV+) (48) | 147         | 146         |
| <b>I<sup>2</sup> = 0.72, Tau<sup>2</sup> = 0.00</b> |                   | <b>6288</b> | <b>6295</b> |

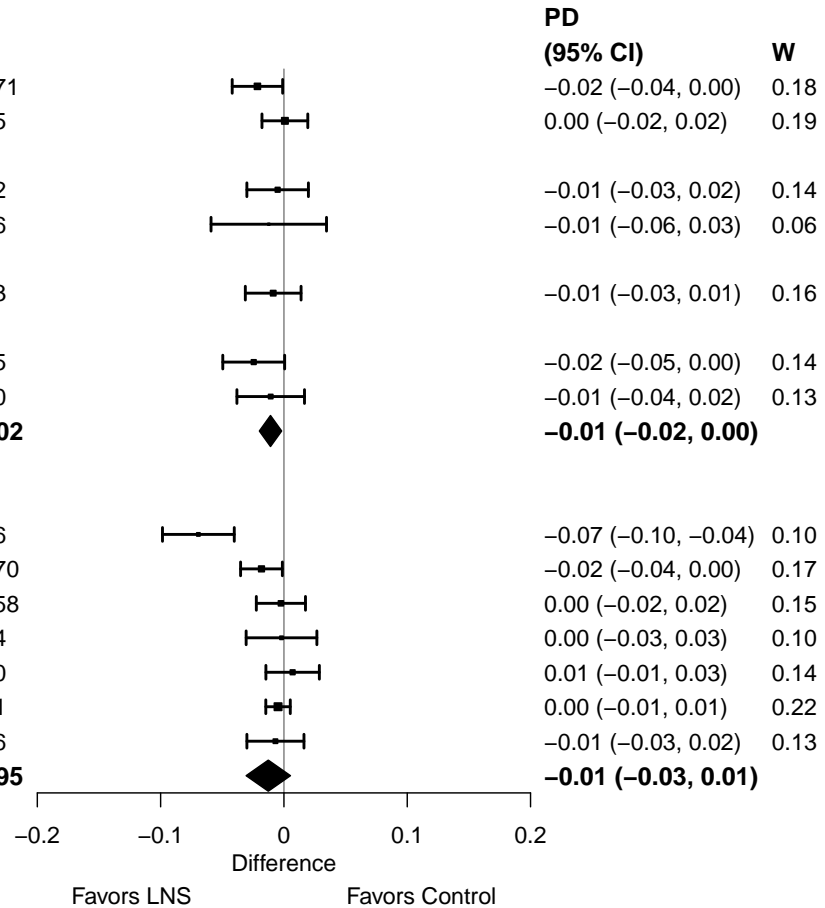

Supplemental figure 4I: Low MUAC prevalence difference

4I6: Stratified by Supplement duration

**Supplement duration**

(p-diff = 0.842)

**Supplement duration – 12m or less**

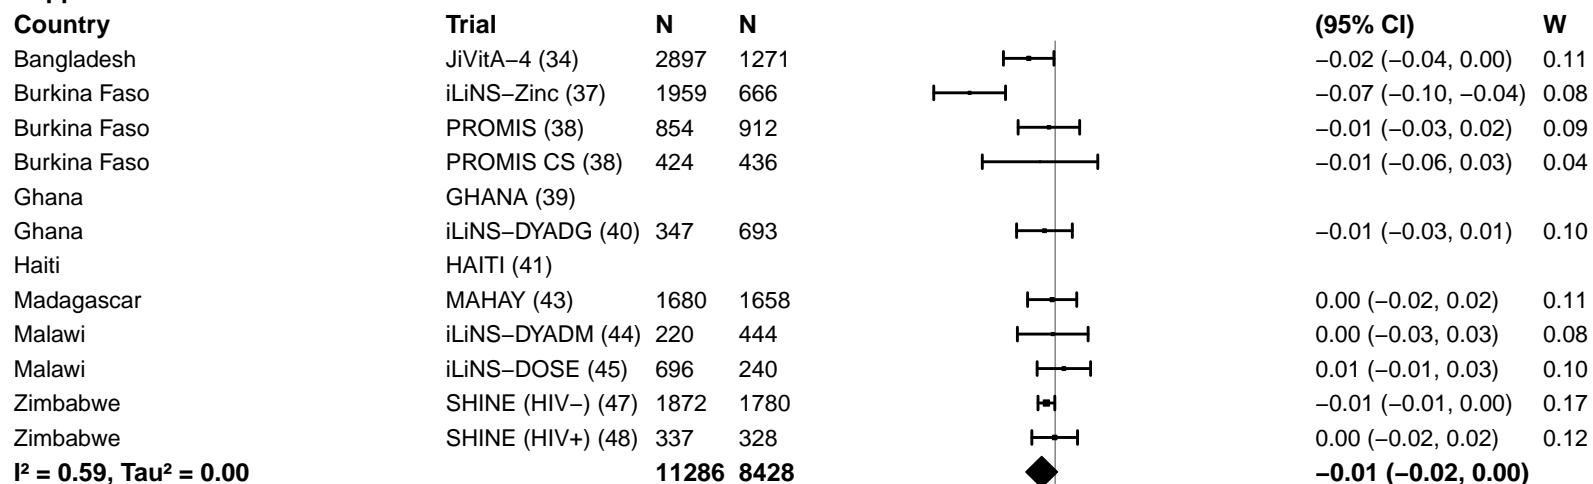

**Supplement duration – > 12m**

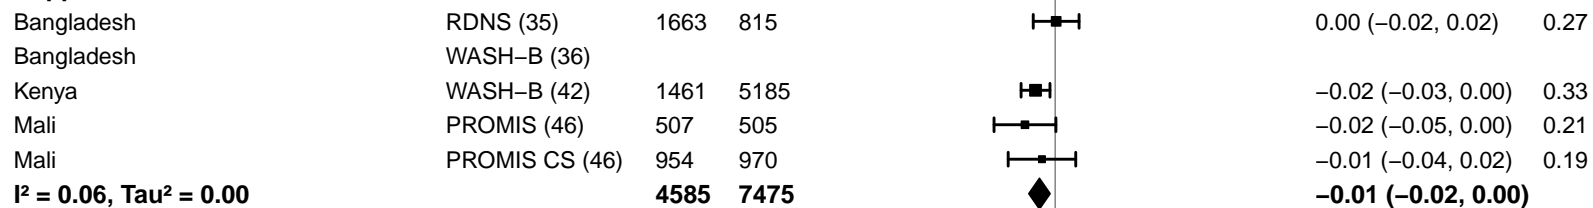

Supplemental figure 4I: Low MUAC prevalence difference

4I7: Stratified by Frequency of contact

**Frequency of contact**  
(p-diff = 0.331)

**Frequency of contact – Monthly**

| Country                                             | Trial             | N           | N            | PD (95% CI)                | W    |
|-----------------------------------------------------|-------------------|-------------|--------------|----------------------------|------|
| Bangladesh                                          | RDNS (35)         | 1663        | 815          | 0.00 (-0.02, 0.02)         | 0.12 |
| Burkina Faso                                        | PROMIS (38)       | 854         | 912          | -0.01 (-0.03, 0.02)        | 0.10 |
| Burkina Faso                                        | PROMIS CS (38)    | 424         | 436          | -0.01 (-0.06, 0.03)        | 0.04 |
| Haiti                                               | HAITI (41)        |             |              |                            |      |
| Kenya                                               | WASH-B (42)       | 1461        | 5185         | -0.02 (-0.03, 0.00)        | 0.15 |
| Madagascar                                          | MAHAY (43)        | 1680        | 1658         | 0.00 (-0.02, 0.02)         | 0.12 |
| Mali                                                | PROMIS (46)       | 507         | 505          | -0.02 (-0.05, 0.00)        | 0.09 |
| Mali                                                | PROMIS CS (46)    | 954         | 970          | -0.01 (-0.04, 0.02)        | 0.09 |
| Zimbabwe                                            | SHINE (HIV-) (47) | 1872        | 1780         | -0.01 (-0.01, 0.00)        | 0.17 |
| Zimbabwe                                            | SHINE (HIV+) (48) | 337         | 328          | 0.00 (-0.02, 0.02)         | 0.12 |
| <b>I<sup>2</sup> = 0.00, Tau<sup>2</sup> = 0.00</b> |                   | <b>9752</b> | <b>12589</b> | <b>-0.01 (-0.01, 0.00)</b> |      |

**Frequency of contact – Weekly**

|                                                     |                  |             |             |                            |      |
|-----------------------------------------------------|------------------|-------------|-------------|----------------------------|------|
| Bangladesh                                          | JiVitA-4 (34)    | 2897        | 1271        | -0.02 (-0.04, 0.00)        | 0.23 |
| Bangladesh                                          | WASH-B (36)      |             |             |                            |      |
| Burkina Faso                                        | iLiNS-Zinc (37)  | 1959        | 666         | -0.07 (-0.10, -0.04)       | 0.17 |
| Ghana                                               | GHANA (39)       |             |             |                            |      |
| Ghana                                               | iLiNS-DYADG (40) | 347         | 693         | -0.01 (-0.03, 0.01)        | 0.21 |
| Malawi                                              | iLiNS-DYADM (44) | 220         | 444         | 0.00 (-0.03, 0.03)         | 0.17 |
| Malawi                                              | iLiNS-DOSE (45)  | 696         | 240         | 0.01 (-0.01, 0.03)         | 0.22 |
| <b>I<sup>2</sup> = 0.79, Tau<sup>2</sup> = 0.00</b> |                  | <b>6119</b> | <b>3314</b> | <b>-0.02 (-0.04, 0.01)</b> |      |

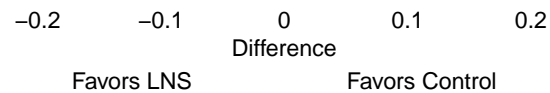

Supplemental figure 4I: Low MUAC prevalence difference

4I8: Stratified by Average SQ-LNS compliance

**Average SQ-LNS compliance**

(p-diff = 0.094)

**Average SQ-LNS compliance – Low**

| Country                                             | Trial             | N           | N           | PD<br>(95% CI)             | W    |
|-----------------------------------------------------|-------------------|-------------|-------------|----------------------------|------|
| Burkina Faso                                        | PROMIS (38)       | 854         | 912         | -0.01 (-0.03, 0.02)        | 0.11 |
| Burkina Faso                                        | PROMIS CS (38)    | 424         | 436         | -0.01 (-0.06, 0.03)        | 0.05 |
| Ghana                                               | iLiNS-DYADG (40)  | 347         | 693         | -0.01 (-0.03, 0.01)        | 0.12 |
| Malawi                                              | iLiNS-DYADM (44)  | 220         | 444         | 0.00 (-0.03, 0.03)         | 0.09 |
| Malawi                                              | iLiNS-DOSE (45)   | 696         | 240         | 0.01 (-0.01, 0.03)         | 0.12 |
| Mali                                                | PROMIS (46)       | 507         | 505         | -0.02 (-0.05, 0.00)        | 0.11 |
| Mali                                                | PROMIS CS (46)    | 954         | 970         | -0.01 (-0.04, 0.02)        | 0.10 |
| Zimbabwe                                            | SHINE (HIV-) (47) | 1872        | 1780        | -0.01 (-0.01, 0.00)        | 0.18 |
| Zimbabwe                                            | SHINE (HIV+) (48) | 337         | 328         | 0.00 (-0.02, 0.02)         | 0.13 |
| <b>I<sup>2</sup> = 0.00, Tau<sup>2</sup> = 0.00</b> |                   | <b>6211</b> | <b>6308</b> | <b>-0.01 (-0.01, 0.00)</b> |      |

**Average SQ-LNS compliance – High**

|                                                     |                 |             |             |                            |      |
|-----------------------------------------------------|-----------------|-------------|-------------|----------------------------|------|
| Bangladesh                                          | JiVitA-4 (34)   | 2897        | 1271        | -0.02 (-0.04, 0.00)        | 0.24 |
| Bangladesh                                          | RDNS (35)       | 1663        | 815         | 0.00 (-0.02, 0.02)         | 0.26 |
| Bangladesh                                          | WASH-B (36)     |             |             |                            |      |
| Burkina Faso                                        | iLiNS-Zinc (37) | 1959        | 666         | -0.07 (-0.10, -0.04)       | 0.18 |
| Ghana                                               | GHANA (39)      |             |             |                            |      |
| Haiti                                               | HAITI (41)      |             |             |                            |      |
| Kenya                                               | WASH-B (42)     | 1461        | 5185        | -0.02 (-0.03, 0.00)        | 0.32 |
| <b>I<sup>2</sup> = 0.81, Tau<sup>2</sup> = 0.00</b> |                 | <b>7980</b> | <b>7937</b> | <b>-0.02 (-0.05, 0.00)</b> |      |

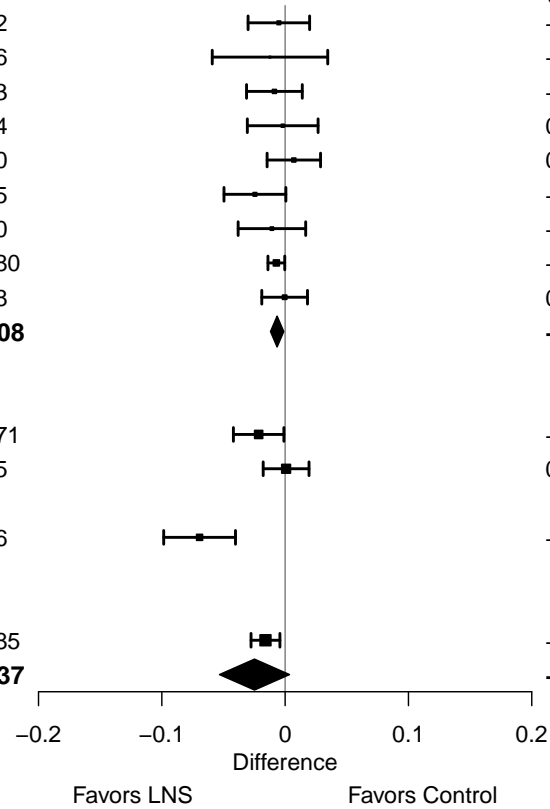

## Supplemental figure 4J: Acute malnutrition prevalence ratio

4J1: Stratified by Geographic region (insufficient comparisons)

Supplemental figure 4J: Acute malnutrition prevalence ratio

4J2: Stratified by Stunting burden

**Stunting burden**

(p-diff = 0.835)

**Stunting burden – Less than 35%**

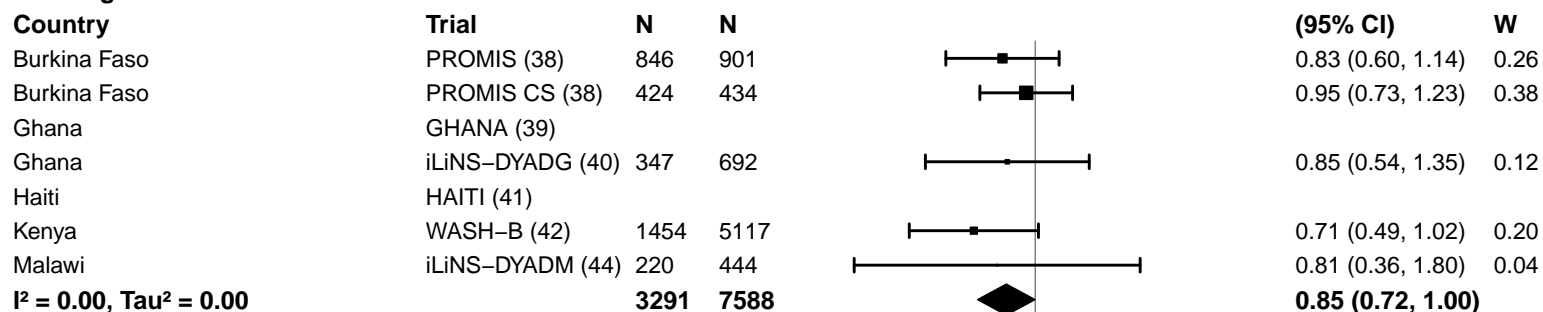

**Stunting burden – More than 35%**

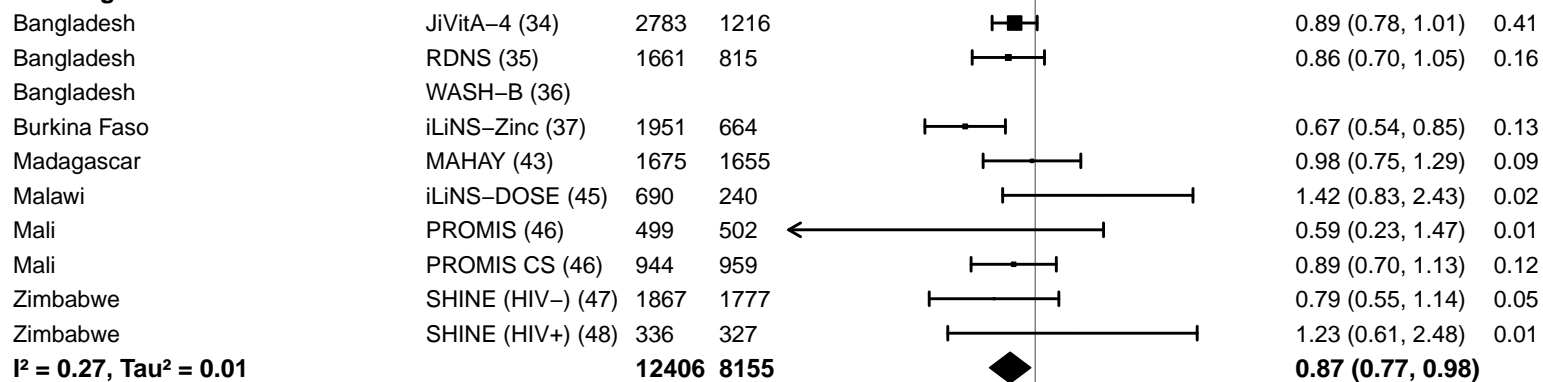

Supplemental figure 4J: Acute malnutrition prevalence ratio

4J3: Stratified by Malaria prevalence

**Malaria prevalence**

(p-diff = 0.526)

**Malaria prevalence – Less than 10%**

| Country    | Trial             | N           | N            |
|------------|-------------------|-------------|--------------|
| Bangladesh | JiVitA-4 (34)     | 2783        | 1216         |
| Bangladesh | RDNS (35)         | 1661        | 815          |
| Bangladesh | WASH-B (36)       |             |              |
| Haiti      | HAITI (41)        |             |              |
| Kenya      | WASH-B (42)       | 1454        | 5117         |
| Madagascar | MAHAY (43)        | 1675        | 1655         |
| Zimbabwe   | SHINE (HIV-) (47) | 1867        | 1777         |
| Zimbabwe   | SHINE (HIV+) (48) | 336         | 327          |
|            |                   | <b>9776</b> | <b>10907</b> |

**I<sup>2</sup> = 0.00, Tau<sup>2</sup> = 0.00**

**Malaria prevalence – At least 10%**

|              |                  |             |             |
|--------------|------------------|-------------|-------------|
| Burkina Faso | iLiNS-Zinc (37)  | 1951        | 664         |
| Burkina Faso | PROMIS (38)      | 846         | 901         |
| Burkina Faso | PROMIS CS (38)   | 424         | 434         |
| Ghana        | GHANA (39)       |             |             |
| Ghana        | iLiNS-DYADG (40) | 347         | 692         |
| Malawi       | iLiNS-DYADM (44) | 220         | 444         |
| Malawi       | iLiNS-DOSE (45)  | 690         | 240         |
| Mali         | PROMIS (46)      | 499         | 502         |
| Mali         | PROMIS CS (46)   | 944         | 959         |
|              |                  | <b>5921</b> | <b>4836</b> |

**I<sup>2</sup> = 0.22, Tau<sup>2</sup> = 0.01**

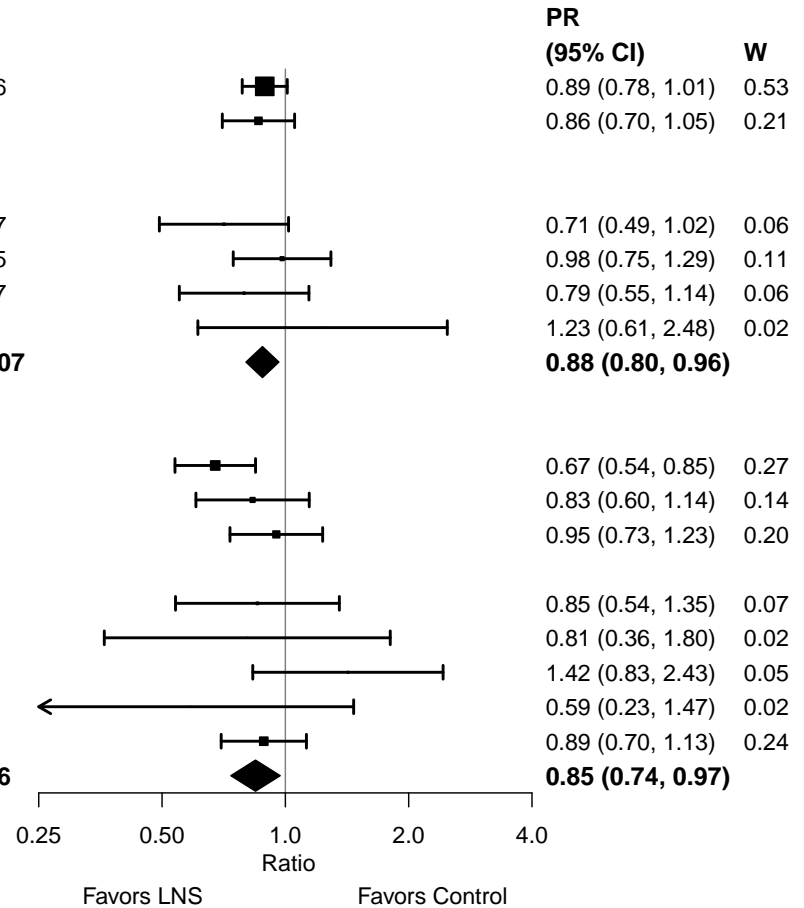

Supplemental figure 4J: Acute malnutrition prevalence ratio

4J4: Stratified by Source water quality

Source water quality

(p-diff = 0.378)

Source water quality – Improved

| Country                                             | Trial            | N           | N           | PR<br>(95% CI)           | W    |
|-----------------------------------------------------|------------------|-------------|-------------|--------------------------|------|
| Bangladesh                                          | JiVitA-4 (34)    | 2783        | 1216        | 0.89 (0.78, 1.01)        | 0.65 |
| Bangladesh                                          | RDNS (35)        | 1661        | 815         | 0.86 (0.70, 1.05)        | 0.25 |
| Bangladesh                                          | WASH-B (36)      |             |             |                          |      |
| Ghana                                               | GHANA (39)       |             |             |                          |      |
| Ghana                                               | iLiNS-DYADG (40) | 347         | 692         | 0.85 (0.54, 1.35)        | 0.05 |
| Haiti                                               | HAITI (41)       |             |             |                          |      |
| Malawi                                              | iLiNS-DYADM (44) | 220         | 444         | 0.81 (0.36, 1.80)        | 0.02 |
| Malawi                                              | iLiNS-DOSE (45)  | 690         | 240         | 1.42 (0.83, 2.43)        | 0.04 |
| <b>I<sup>2</sup> = 0.00, Tau<sup>2</sup> = 0.00</b> |                  | <b>5701</b> | <b>3407</b> | <b>0.89 (0.81, 0.99)</b> |      |

Source water quality – Unimproved

|                                                     |                   |             |             |                          |      |
|-----------------------------------------------------|-------------------|-------------|-------------|--------------------------|------|
| Burkina Faso                                        | iLiNS-Zinc (37)   | 1951        | 664         | 0.67 (0.54, 0.85)        | 0.23 |
| Burkina Faso                                        | PROMIS (38)       | 846         | 901         | 0.83 (0.60, 1.14)        | 0.12 |
| Burkina Faso                                        | PROMIS CS (38)    | 424         | 434         | 0.95 (0.73, 1.23)        | 0.18 |
| Kenya                                               | WASH-B (42)       | 694         | 2244        | 0.76 (0.43, 1.34)        | 0.04 |
| Madagascar                                          | MAHAY (43)        | 1675        | 1655        | 0.98 (0.75, 1.29)        | 0.16 |
| Mali                                                | PROMIS (46)       | 499         | 502         | 0.59 (0.23, 1.47)        | 0.01 |
| Mali                                                | PROMIS CS (46)    | 944         | 959         | 0.89 (0.70, 1.13)        | 0.21 |
| Zimbabwe                                            | SHINE (HIV-) (47) | 886         | 871         | 0.82 (0.49, 1.37)        | 0.05 |
| Zimbabwe                                            | SHINE (HIV+) (48) | 147         | 146         | 0.87 (0.27, 2.79)        | 0.01 |
| <b>I<sup>2</sup> = 0.00, Tau<sup>2</sup> = 0.00</b> |                   | <b>8066</b> | <b>8376</b> | <b>0.84 (0.75, 0.93)</b> |      |

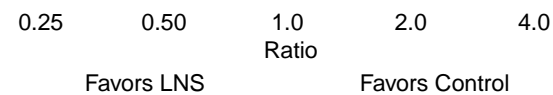



Supplemental figure 4J: Acute malnutrition prevalence ratio

4J5: Stratified by Sanitation

**Sanitation**  
(p-diff = 0.450)

**Sanitation – Improved**

| Country      | Trial            | N           | N           | PR (95% CI)              | W    |
|--------------|------------------|-------------|-------------|--------------------------|------|
| Bangladesh   | JiVitA-4 (34)    | 2783        | 1216        | 0.89 (0.78, 1.01)        | 0.46 |
| Bangladesh   | RDNS (35)        | 1661        | 815         | 0.86 (0.70, 1.05)        | 0.18 |
| Bangladesh   | WASH-B (36)      |             |             |                          |      |
| Burkina Faso | PROMIS (38)      | 846         | 901         | 0.83 (0.60, 1.14)        | 0.07 |
| Burkina Faso | PROMIS CS (38)   | 424         | 434         | 0.95 (0.73, 1.23)        | 0.11 |
| Ghana        | GHANA (39)       |             |             |                          |      |
| Ghana        | iLiNS-DYADG (40) | 347         | 692         | 0.85 (0.54, 1.35)        | 0.04 |
| Haiti        | HAITI (41)       |             |             |                          |      |
| Mali         | PROMIS (46)      | 499         | 502         | 0.59 (0.23, 1.47)        | 0.01 |
| Mali         | PROMIS CS (46)   | 944         | 959         | 0.89 (0.70, 1.13)        | 0.13 |
|              |                  | <b>7504</b> | <b>5519</b> | <b>0.88 (0.81, 0.96)</b> |      |

**I<sup>2</sup> = 0.00, Tau<sup>2</sup> = 0.00**

**Sanitation – Unimproved**

|              |                   |             |             |                          |      |
|--------------|-------------------|-------------|-------------|--------------------------|------|
| Burkina Faso | iLiNS-Zinc (37)   | 1951        | 664         | 0.67 (0.54, 0.85)        | 0.43 |
| Kenya        | WASH-B (42)       | 694         | 2244        | 0.76 (0.43, 1.34)        | 0.07 |
| Madagascar   | MAHAY (43)        | 1675        | 1655        | 0.98 (0.75, 1.29)        | 0.29 |
| Malawi       | iLiNS-DYADM (44)  | 220         | 444         | 0.81 (0.36, 1.80)        | 0.03 |
| Malawi       | iLiNS-DOSE (45)   | 690         | 240         | 1.42 (0.83, 2.43)        | 0.08 |
| Zimbabwe     | SHINE (HIV-) (47) | 886         | 871         | 0.82 (0.49, 1.37)        | 0.08 |
| Zimbabwe     | SHINE (HIV+) (48) | 147         | 146         | 0.87 (0.27, 2.79)        | 0.02 |
|              |                   | <b>6263</b> | <b>6264</b> | <b>0.85 (0.70, 1.02)</b> |      |

**I<sup>2</sup> = 0.31, Tau<sup>2</sup> = 0.01**

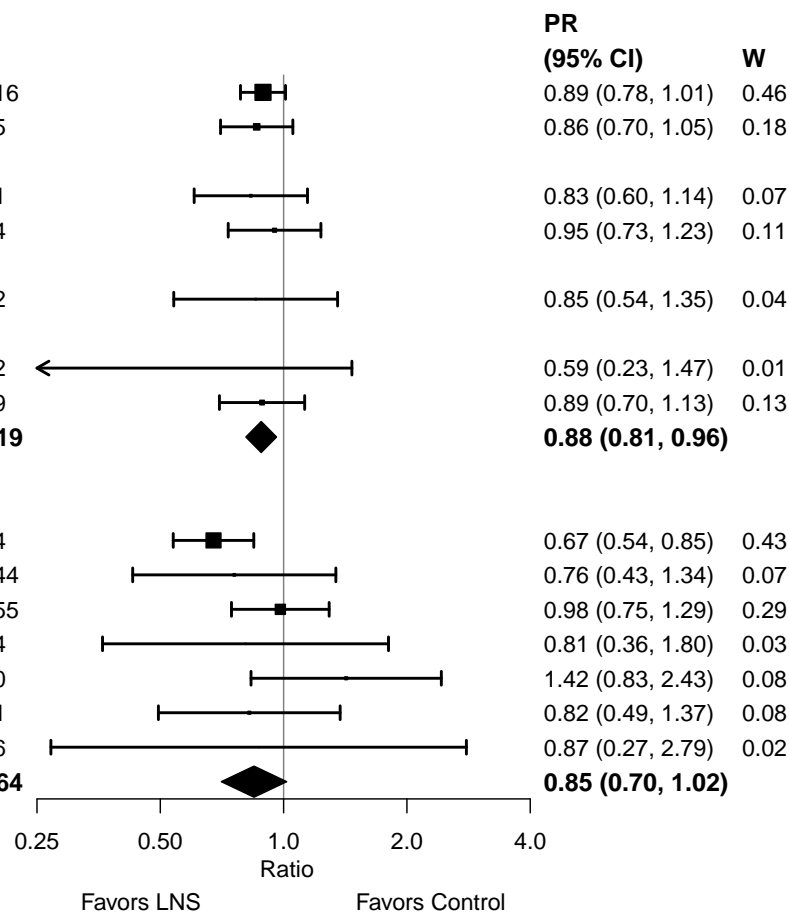

Supplemental figure 4J: Acute malnutrition prevalence ratio

4J6: Stratified by Supplement duration

**Supplement duration**

(p-diff = 0.607)

**Supplement duration – 12m or less**

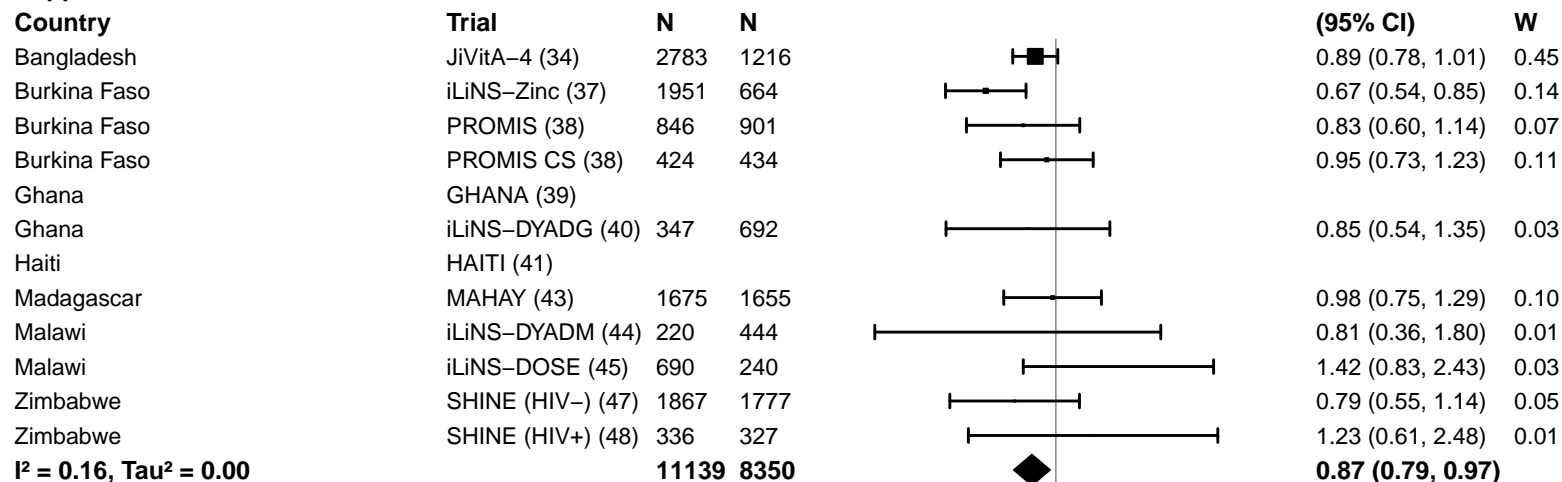

**Supplement duration – > 12m**

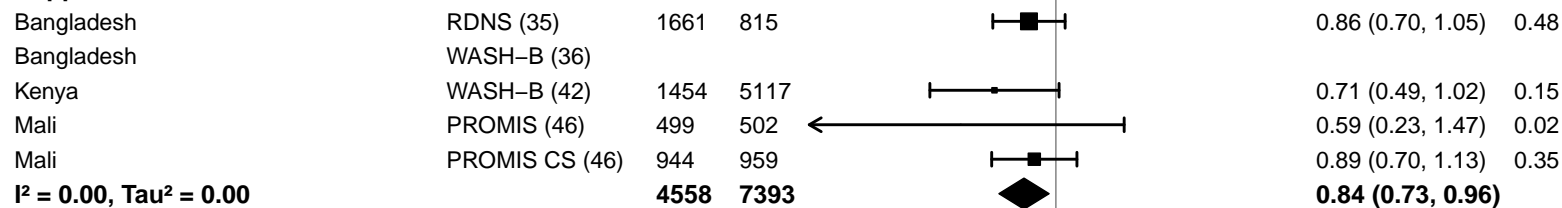

Supplemental figure 4J: Acute malnutrition prevalence ratio

4J7: Stratified by Frequency of contact

Frequency of contact  
(p-diff = 0.706)

Frequency of contact – Monthly

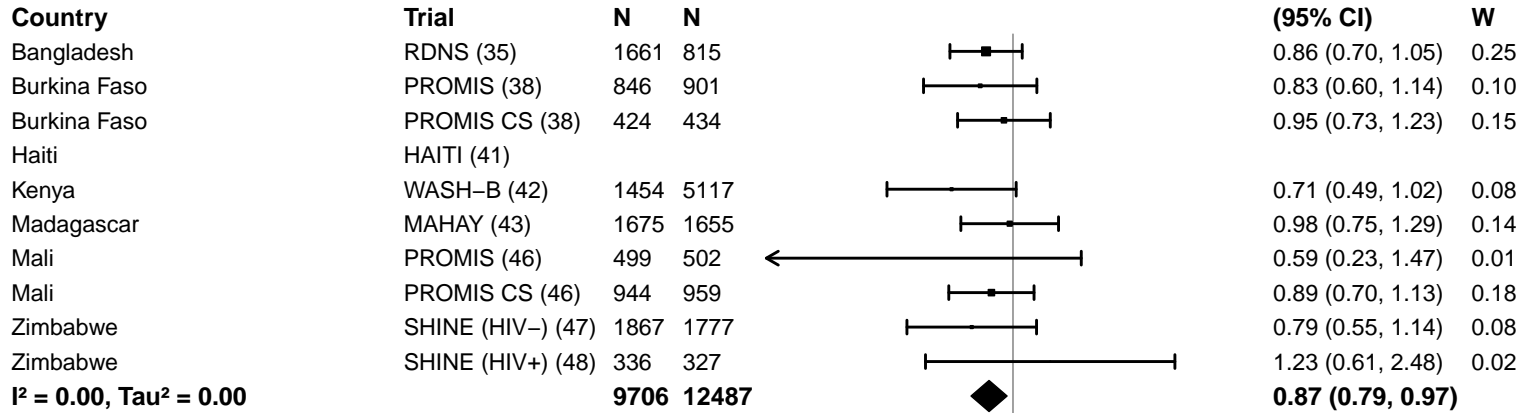

Frequency of contact – Weekly

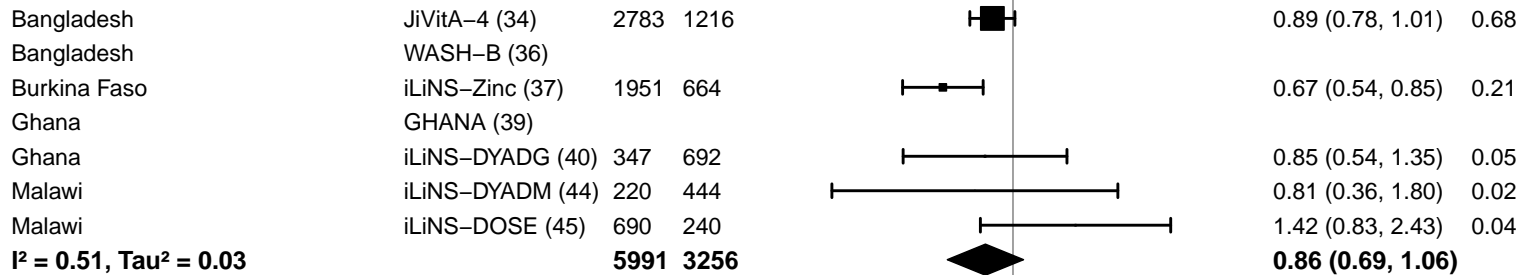

Supplemental figure 4J: Acute malnutrition prevalence ratio

4J8: Stratified by Average SQ-LNS compliance

**Average SQ-LNS compliance**  
(p-diff = 0.269)

**Average SQ-LNS compliance – Low**

| Country      | Trial             | N           | N           | PR (95% CI)              | W    |
|--------------|-------------------|-------------|-------------|--------------------------|------|
| Burkina Faso | PROMIS (38)       | 846         | 901         | 0.83 (0.60, 1.14)        | 0.16 |
| Burkina Faso | PROMIS CS (38)    | 424         | 434         | 0.95 (0.73, 1.23)        | 0.24 |
| Ghana        | iLiNS-DYADG (40)  | 347         | 692         | 0.85 (0.54, 1.35)        | 0.08 |
| Malawi       | iLiNS-DYADM (44)  | 220         | 444         | 0.81 (0.36, 1.80)        | 0.02 |
| Malawi       | iLiNS-DOSE (45)   | 690         | 240         | 1.42 (0.83, 2.43)        | 0.06 |
| Mali         | PROMIS (46)       | 499         | 502         | 0.59 (0.23, 1.47)        | 0.02 |
| Mali         | PROMIS CS (46)    | 944         | 959         | 0.89 (0.70, 1.13)        | 0.28 |
| Zimbabwe     | SHINE (HIV-) (47) | 1867        | 1777        | 0.79 (0.55, 1.14)        | 0.12 |
| Zimbabwe     | SHINE (HIV+) (48) | 336         | 327         | 1.23 (0.61, 2.48)        | 0.03 |
|              |                   | <b>6173</b> | <b>6276</b> | <b>0.90 (0.79, 1.02)</b> |      |

**Average SQ-LNS compliance – High**

|              |                 |             |             |                          |      |
|--------------|-----------------|-------------|-------------|--------------------------|------|
| Bangladesh   | JiVitA-4 (34)   | 2783        | 1216        | 0.89 (0.78, 1.01)        | 0.55 |
| Bangladesh   | RDNS (35)       | 1661        | 815         | 0.86 (0.70, 1.05)        | 0.21 |
| Bangladesh   | WASH-B (36)     |             |             |                          |      |
| Burkina Faso | iLiNS-Zinc (37) | 1951        | 664         | 0.67 (0.54, 0.85)        | 0.17 |
| Ghana        | GHANA (39)      |             |             |                          |      |
| Haiti        | HAITI (41)      |             |             |                          |      |
| Kenya        | WASH-B (42)     | 1454        | 5117        | 0.71 (0.49, 1.02)        | 0.07 |
|              |                 | <b>7849</b> | <b>7812</b> | <b>0.81 (0.71, 0.92)</b> |      |

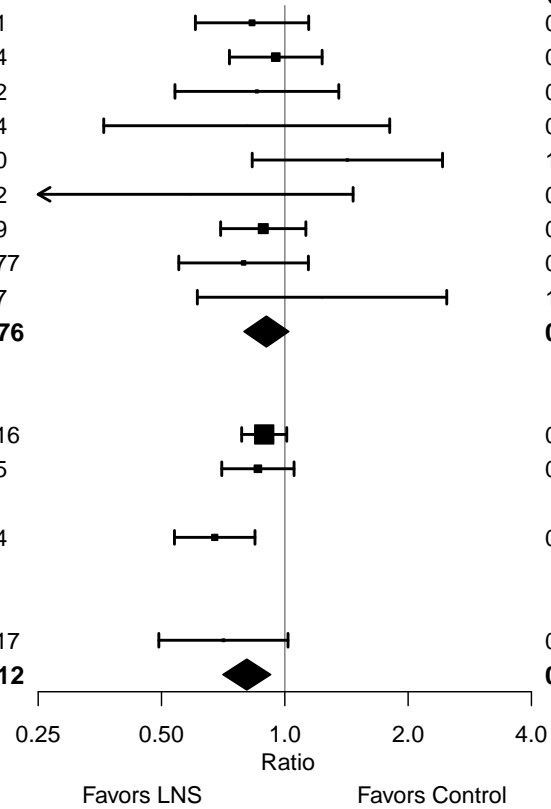

## Supplemental figure 4K: Acute malnutrition prevalence difference

4K1: Stratified by Geographic region (insufficient comparisons)

Supplemental figure 4K: Acute malnutrition prevalence difference

4K2: Stratified by Stunting burden

**Stunting burden**

(p-diff = 0.872)

**Stunting burden – Less than 35%**

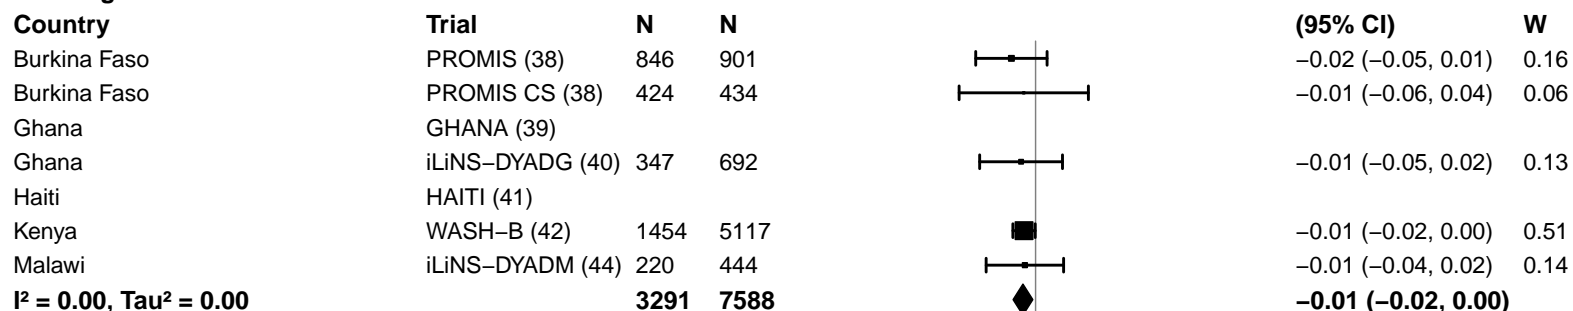

**Stunting burden – More than 35%**

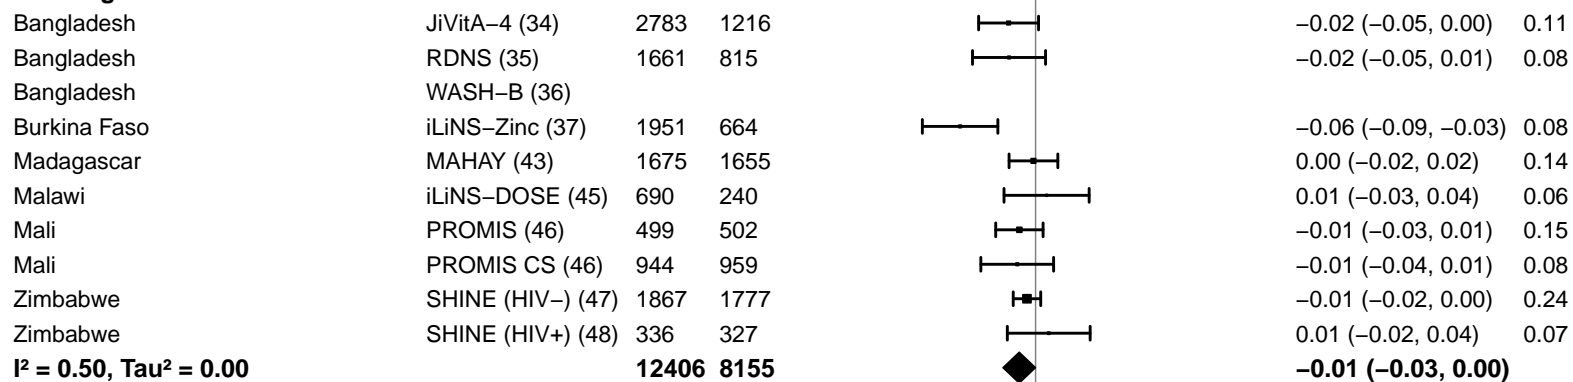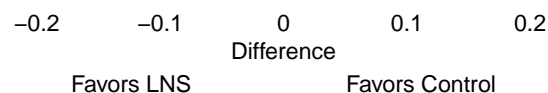

Supplemental figure 4K: Acute malnutrition prevalence difference

4K3: Stratified by Malaria prevalence

**Malaria prevalence**

(p-diff = 0.181)

**Malaria prevalence – Less than 10%**

| Country                                             | Trial             | N           | N            | PD<br>(95% CI)             | W    |
|-----------------------------------------------------|-------------------|-------------|--------------|----------------------------|------|
| Bangladesh                                          | JiVitA-4 (34)     | 2783        | 1216         | -0.02 (-0.05, 0.00)        | 0.12 |
| Bangladesh                                          | RDNS (35)         | 1661        | 815          | -0.02 (-0.05, 0.01)        | 0.09 |
| Bangladesh                                          | WASH-B (36)       |             |              |                            |      |
| Haiti                                               | HAITI (41)        |             |              |                            |      |
| Kenya                                               | WASH-B (42)       | 1454        | 5117         | -0.01 (-0.02, 0.00)        | 0.30 |
| Madagascar                                          | MAHAY (43)        | 1675        | 1655         | 0.00 (-0.02, 0.02)         | 0.16 |
| Zimbabwe                                            | SHINE (HIV-) (47) | 1867        | 1777         | -0.01 (-0.02, 0.00)        | 0.26 |
| Zimbabwe                                            | SHINE (HIV+) (48) | 336         | 327          | 0.01 (-0.02, 0.04)         | 0.07 |
| <b>I<sup>2</sup> = 0.00, Tau<sup>2</sup> = 0.00</b> |                   | <b>9776</b> | <b>10907</b> | <b>-0.01 (-0.01, 0.00)</b> |      |

**Malaria prevalence – At least 10%**

|                                                     |                  |             |             |                            |      |
|-----------------------------------------------------|------------------|-------------|-------------|----------------------------|------|
| Burkina Faso                                        | iLiNS-Zinc (37)  | 1951        | 664         | -0.06 (-0.09, -0.03)       | 0.12 |
| Burkina Faso                                        | PROMIS (38)      | 846         | 901         | -0.02 (-0.05, 0.01)        | 0.13 |
| Burkina Faso                                        | PROMIS CS (38)   | 424         | 434         | -0.01 (-0.06, 0.04)        | 0.05 |
| Ghana                                               | GHANA (39)       |             |             |                            |      |
| Ghana                                               | iLiNS-DYADG (40) | 347         | 692         | -0.01 (-0.05, 0.02)        | 0.11 |
| Malawi                                              | iLiNS-DYADM (44) | 220         | 444         | -0.01 (-0.04, 0.02)        | 0.12 |
| Malawi                                              | iLiNS-DOSE (45)  | 690         | 240         | 0.01 (-0.03, 0.04)         | 0.10 |
| Mali                                                | PROMIS (46)      | 499         | 502         | -0.01 (-0.03, 0.01)        | 0.23 |
| Mali                                                | PROMIS CS (46)   | 944         | 959         | -0.01 (-0.04, 0.01)        | 0.13 |
| <b>I<sup>2</sup> = 0.35, Tau<sup>2</sup> = 0.00</b> |                  | <b>5921</b> | <b>4836</b> | <b>-0.02 (-0.03, 0.00)</b> |      |

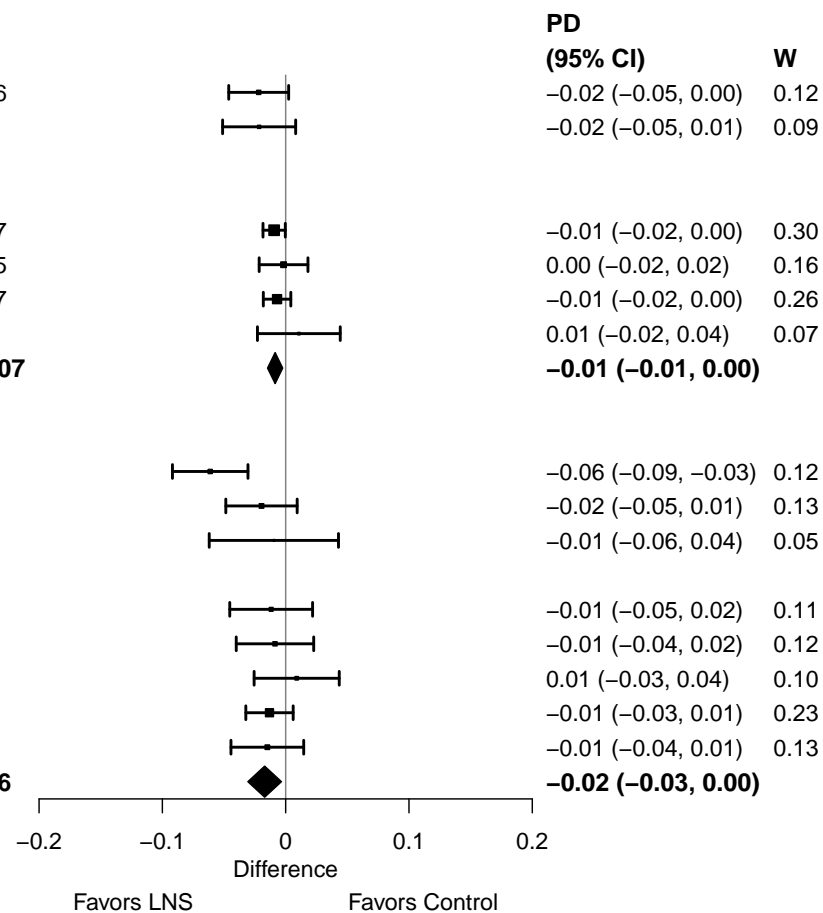

Supplemental figure 4K: Acute malnutrition prevalence difference

4K4: Stratified by Source water quality

**Source water quality**

(p-diff = 0.852)

**Source water quality – Improved**

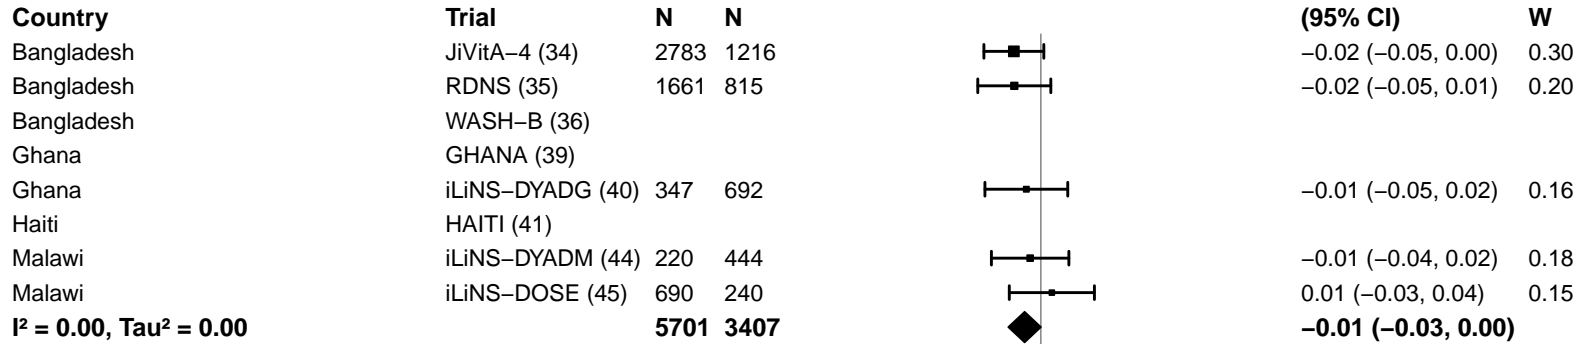

**Source water quality – Unimproved**

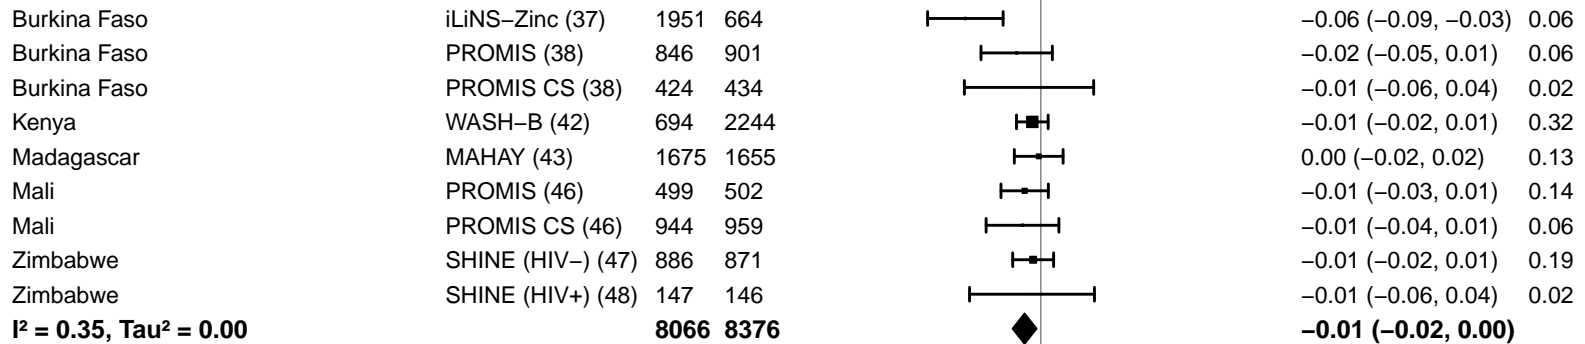

-0.2 -0.1 0 0.1 0.2  
Difference  
Favors LNS Favors Control





Supplemental figure 4K: Acute malnutrition prevalence difference

4K6: Stratified by Supplement duration

**Supplement duration**

(p-diff = 0.887)

**Supplement duration – 12m or less**

| Country                                             | Trial             | N            | N           |
|-----------------------------------------------------|-------------------|--------------|-------------|
| Bangladesh                                          | JiVitA-4 (34)     | 2783         | 1216        |
| Burkina Faso                                        | iLiNS-Zinc (37)   | 1951         | 664         |
| Burkina Faso                                        | PROMIS (38)       | 846          | 901         |
| Burkina Faso                                        | PROMIS CS (38)    | 424          | 434         |
| Ghana                                               | GHANA (39)        |              |             |
| Ghana                                               | iLiNS-DYADG (40)  | 347          | 692         |
| Haiti                                               | HAITI (41)        |              |             |
| Madagascar                                          | MAHAY (43)        | 1675         | 1655        |
| Malawi                                              | iLiNS-DYADM (44)  | 220          | 444         |
| Malawi                                              | iLiNS-DOSE (45)   | 690          | 240         |
| Zimbabwe                                            | SHINE (HIV-) (47) | 1867         | 1777        |
| Zimbabwe                                            | SHINE (HIV+) (48) | 336          | 327         |
| <b>I<sup>2</sup> = 0.43, Tau<sup>2</sup> = 0.00</b> |                   | <b>11139</b> | <b>8350</b> |

**Supplement duration – > 12m**

|                                                     |                |             |             |
|-----------------------------------------------------|----------------|-------------|-------------|
| Bangladesh                                          | RDNS (35)      | 1661        | 815         |
| Bangladesh                                          | WASH-B (36)    |             |             |
| Kenya                                               | WASH-B (42)    | 1454        | 5117        |
| Mali                                                | PROMIS (46)    | 499         | 502         |
| Mali                                                | PROMIS CS (46) | 944         | 959         |
| <b>I<sup>2</sup> = 0.00, Tau<sup>2</sup> = 0.00</b> |                | <b>4558</b> | <b>7393</b> |

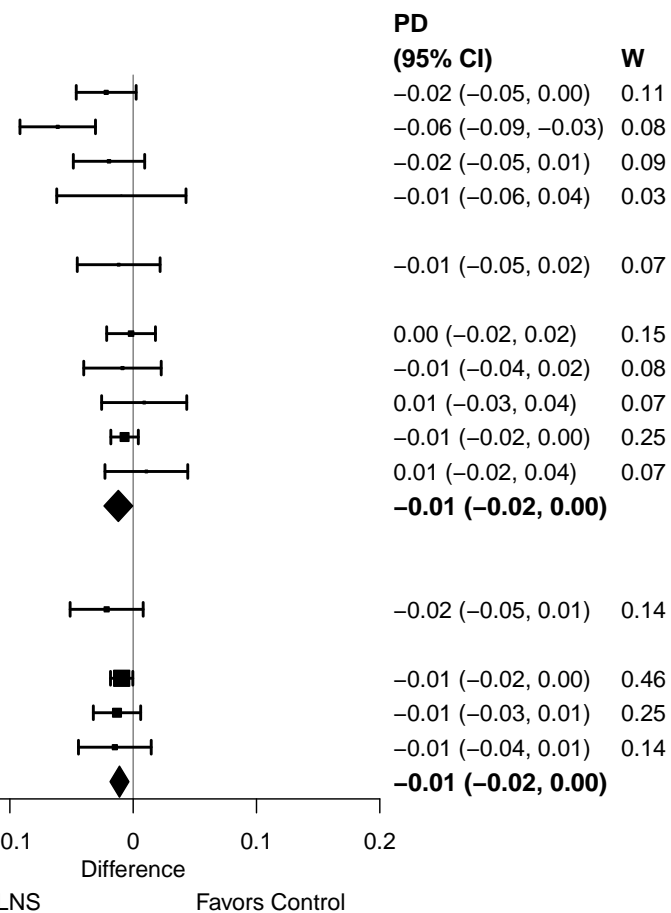

Supplemental figure 4K: Acute malnutrition prevalence difference

4K7: Stratified by Frequency of contact

**Frequency of contact**  
(p-diff = 0.113)

**Frequency of contact – Monthly**

| Country                                             | Trial             | N           | N            | PD (95% CI)                | W    |
|-----------------------------------------------------|-------------------|-------------|--------------|----------------------------|------|
| Bangladesh                                          | RDNS (35)         | 1661        | 815          | -0.02 (-0.05, 0.01)        | 0.07 |
| Burkina Faso                                        | PROMIS (38)       | 846         | 901          | -0.02 (-0.05, 0.01)        | 0.07 |
| Burkina Faso                                        | PROMIS CS (38)    | 424         | 434          | -0.01 (-0.06, 0.04)        | 0.03 |
| Haiti                                               | HAITI (41)        |             |              |                            |      |
| Kenya                                               | WASH-B (42)       | 1454        | 5117         | -0.01 (-0.02, 0.00)        | 0.23 |
| Madagascar                                          | MAHAY (43)        | 1675        | 1655         | 0.00 (-0.02, 0.02)         | 0.12 |
| Mali                                                | PROMIS (46)       | 499         | 502          | -0.01 (-0.03, 0.01)        | 0.13 |
| Mali                                                | PROMIS CS (46)    | 944         | 959          | -0.01 (-0.04, 0.01)        | 0.07 |
| Zimbabwe                                            | SHINE (HIV-) (47) | 1867        | 1777         | -0.01 (-0.02, 0.00)        | 0.21 |
| Zimbabwe                                            | SHINE (HIV+) (48) | 336         | 327          | 0.01 (-0.02, 0.04)         | 0.06 |
| <b>I<sup>2</sup> = 0.00, Tau<sup>2</sup> = 0.00</b> |                   | <b>9706</b> | <b>12487</b> | <b>-0.01 (-0.01, 0.00)</b> |      |

**Frequency of contact – Weekly**

|                                                     |                  |             |             |                            |      |
|-----------------------------------------------------|------------------|-------------|-------------|----------------------------|------|
| Bangladesh                                          | JiVitA-4 (34)    | 2783        | 1216        | -0.02 (-0.05, 0.00)        | 0.28 |
| Bangladesh                                          | WASH-B (36)      |             |             |                            |      |
| Burkina Faso                                        | iLiNS-Zinc (37)  | 1951        | 664         | -0.06 (-0.09, -0.03)       | 0.20 |
| Ghana                                               | GHANA (39)       |             |             |                            |      |
| Ghana                                               | iLiNS-DYADG (40) | 347         | 692         | -0.01 (-0.05, 0.02)        | 0.17 |
| Malawi                                              | iLiNS-DYADM (44) | 220         | 444         | -0.01 (-0.04, 0.02)        | 0.19 |
| Malawi                                              | iLiNS-DOSE (45)  | 690         | 240         | 0.01 (-0.03, 0.04)         | 0.16 |
| <b>I<sup>2</sup> = 0.62, Tau<sup>2</sup> = 0.00</b> |                  | <b>5991</b> | <b>3256</b> | <b>-0.02 (-0.04, 0.00)</b> |      |

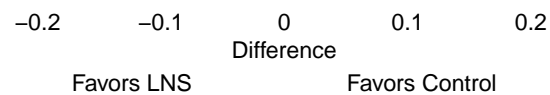

Supplemental figure 4K: Acute malnutrition prevalence difference

4K8: Stratified by Average SQ-LNS compliance

**Average SQ-LNS compliance**

(p-diff = 0.129)

**Average SQ-LNS compliance – Low**

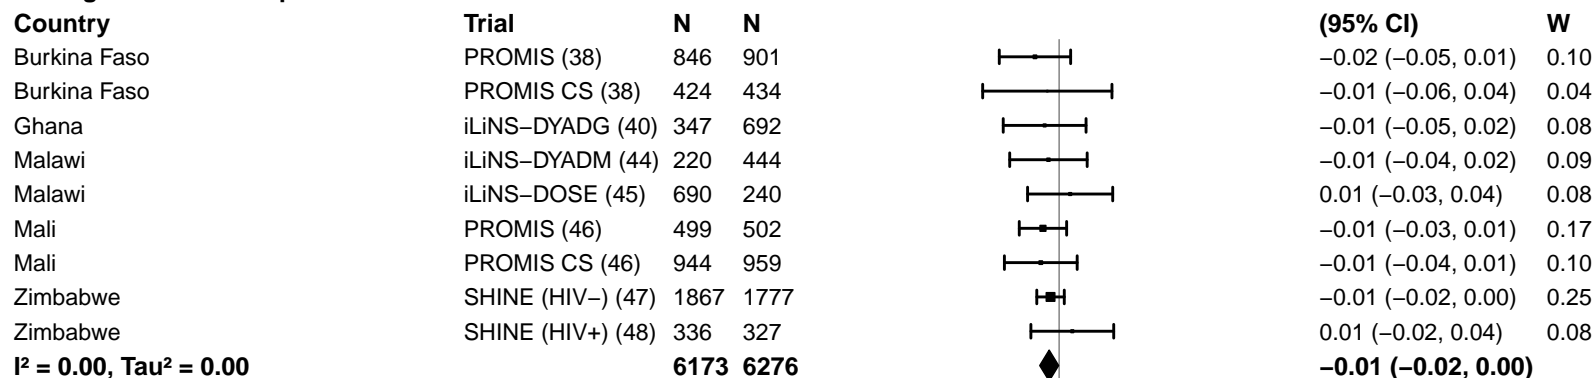

**Average SQ-LNS compliance – High**

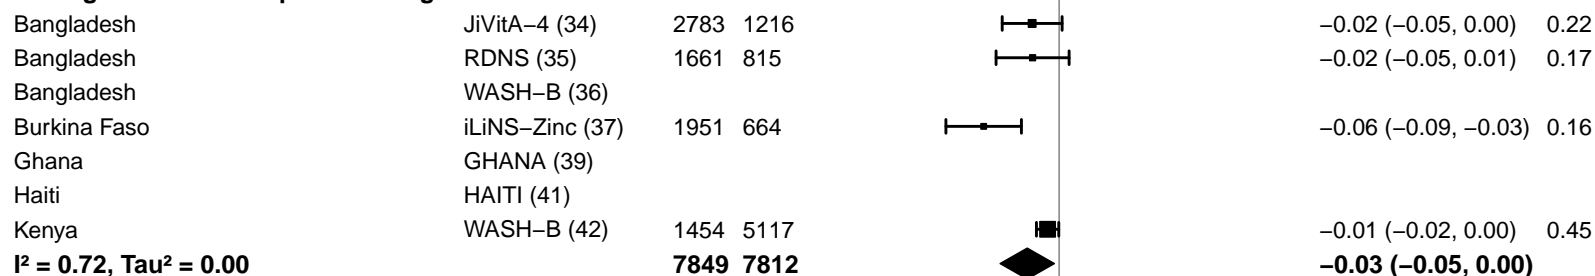

## Supplemental figure 4L: Mean difference in WAZ

### 4L1: Stratified by Geographic region

#### Geographic region

( $p$ -diff = 0.791)

#### Geographic region – SEAR

| Country    | Trial         | N           | N           | MD<br>(95% CI)           | W    |
|------------|---------------|-------------|-------------|--------------------------|------|
| Bangladesh | JiVitA-4 (34) | 2814        | 1232        | 0.10 (0.07, 0.14)        | 0.38 |
| Bangladesh | RDNS (35)     | 1663        | 815         | 0.09 (0.01, 0.18)        | 0.30 |
| Bangladesh | WASH-B (36)   | 1163        | 3461        | 0.20 (0.13, 0.26)        | 0.33 |
|            |               | <b>5640</b> | <b>5508</b> | <b>0.13 (0.07, 0.19)</b> |      |

$I^2 = 0.68$ ,  $\tau^2 = 0.00$

#### Geographic region – AFR

|              |                   |              |              |                          |      |
|--------------|-------------------|--------------|--------------|--------------------------|------|
| Burkina Faso | iLiNS-Zinc (37)   | 1960         | 666          | 0.28 (0.21, 0.35)        | 0.11 |
| Burkina Faso | PROMIS (38)       | 857          | 911          | 0.15 (0.03, 0.27)        | 0.08 |
| Burkina Faso | PROMIS CS (38)    | 430          | 436          | -0.05 (-0.19, 0.09)      | 0.07 |
| Ghana        | GHANA (39)        | 98           | 96           | 0.28 (-0.05, 0.61)       | 0.02 |
| Ghana        | iLiNS-DYADG (40)  | 347          | 693          | 0.16 (0.03, 0.29)        | 0.07 |
| Kenya        | WASH-B (42)       | 1461         | 5165         | 0.13 (0.07, 0.20)        | 0.11 |
| Madagascar   | MAHAY (43)        | 1702         | 1685         | 0.01 (-0.10, 0.13)       | 0.08 |
| Malawi       | iLiNS-DYADM (44)  | 220          | 444          | -0.07 (-0.23, 0.10)      | 0.06 |
| Malawi       | iLiNS-DOSE (45)   | 702          | 241          | 0.05 (-0.05, 0.16)       | 0.09 |
| Mali         | PROMIS (46)       | 500          | 502          | 0.16 (0.05, 0.28)        | 0.08 |
| Mali         | PROMIS CS (46)    | 946          | 960          | 0.23 (0.11, 0.36)        | 0.08 |
| Zimbabwe     | SHINE (HIV-) (47) | 1869         | 1786         | 0.13 (0.07, 0.20)        | 0.11 |
| Zimbabwe     | SHINE (HIV+) (48) | 336          | 328          | 0.01 (-0.16, 0.18)       | 0.06 |
|              |                   | <b>11428</b> | <b>13913</b> | <b>0.12 (0.06, 0.17)</b> |      |

$I^2 = 0.70$ ,  $\tau^2 = 0.01$

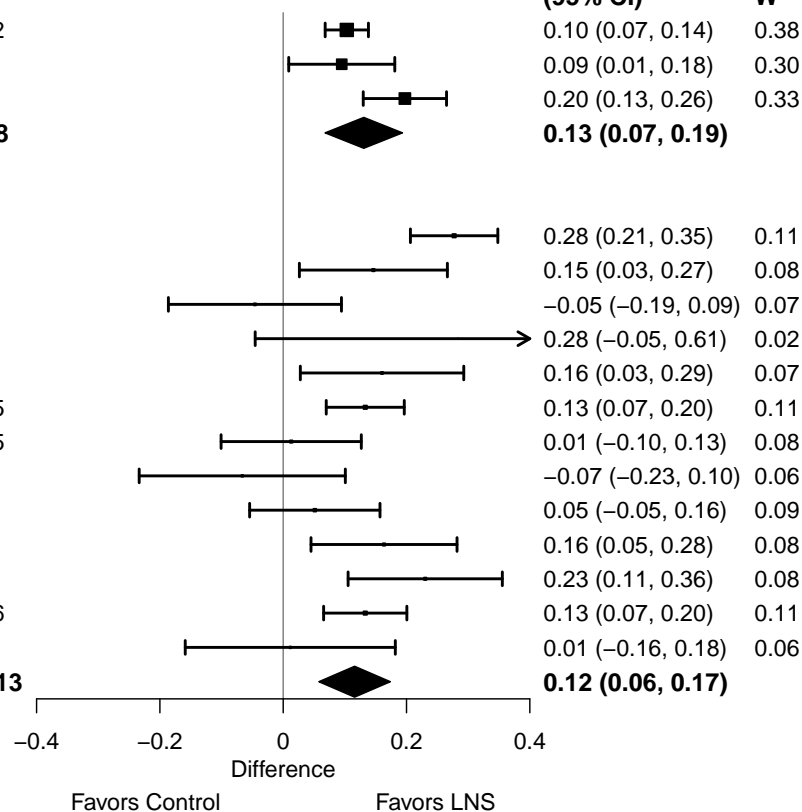

Supplemental figure 4L: Mean difference in WAZ

4L2: Stratified by Stunting burden

**Stunting burden**

(p-diff = 0.292)

**Stunting burden – Less than 35%**

| Country                                             | Trial            | N           | N           |
|-----------------------------------------------------|------------------|-------------|-------------|
| Burkina Faso                                        | PROMIS (38)      | 857         | 911         |
| Burkina Faso                                        | PROMIS CS (38)   | 430         | 436         |
| Ghana                                               | GHANA (39)       | 98          | 96          |
| Ghana                                               | iLiNS-DYADG (40) | 347         | 693         |
| Haiti                                               | HAITI (41)       | 148         | 150         |
| Kenya                                               | WASH-B (42)      | 1461        | 5165        |
| Malawi                                              | iLiNS-DYADM (44) | 220         | 444         |
| <b>I<sup>2</sup> = 0.50, Tau<sup>2</sup> = 0.01</b> |                  | <b>3561</b> | <b>7895</b> |

**Stunting burden – More than 35%**

|                                                     |                   |              |              |
|-----------------------------------------------------|-------------------|--------------|--------------|
| Bangladesh                                          | JiVitA-4 (34)     | 2814         | 1232         |
| Bangladesh                                          | RDNS (35)         | 1663         | 815          |
| Bangladesh                                          | WASH-B (36)       | 1163         | 3461         |
| Burkina Faso                                        | iLiNS-Zinc (37)   | 1960         | 666          |
| Madagascar                                          | MAHAY (43)        | 1702         | 1685         |
| Malawi                                              | iLiNS-DOSE (45)   | 702          | 241          |
| Mali                                                | PROMIS (46)       | 500          | 502          |
| Mali                                                | PROMIS CS (46)    | 946          | 960          |
| Zimbabwe                                            | SHINE (HIV-) (47) | 1869         | 1786         |
| Zimbabwe                                            | SHINE (HIV+) (48) | 336          | 328          |
| <b>I<sup>2</sup> = 0.74, Tau<sup>2</sup> = 0.01</b> |                   | <b>13655</b> | <b>11676</b> |

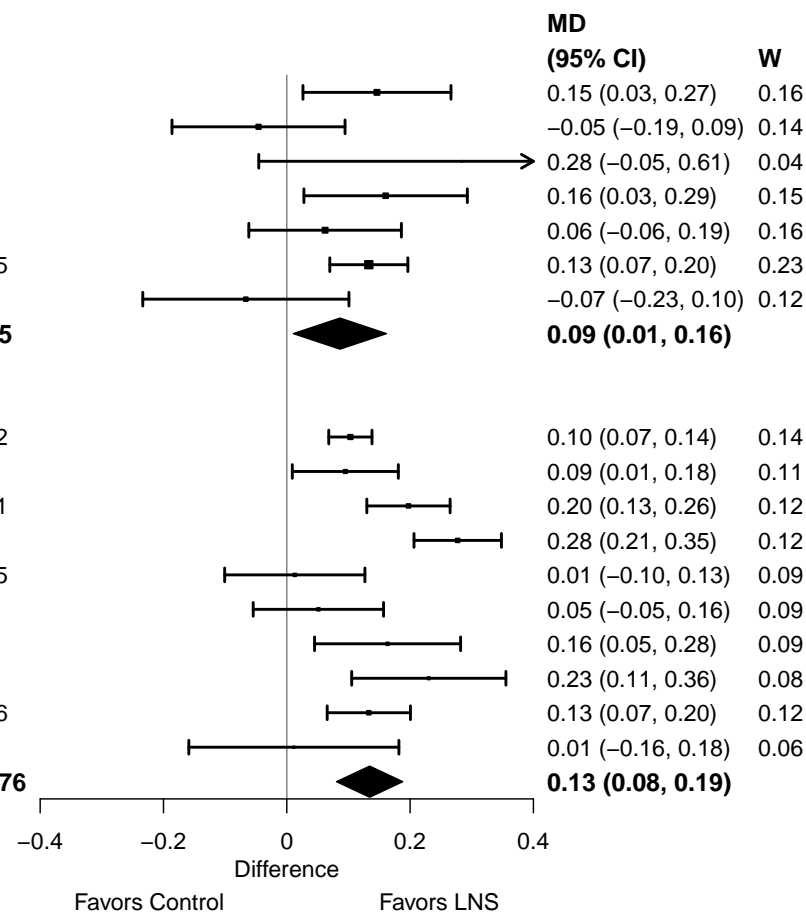

Supplemental figure 4L: Mean difference in WAZ

4L3: Stratified by Malaria prevalence

**Malaria prevalence**  
(p-diff = 0.490)

**Malaria prevalence – Less than 10%**

| Country    | Trial             | N            | N            |
|------------|-------------------|--------------|--------------|
| Bangladesh | JiVitA-4 (34)     | 2814         | 1232         |
| Bangladesh | RDNS (35)         | 1663         | 815          |
| Bangladesh | WASH-B (36)       | 1163         | 3461         |
| Haiti      | HAITI (41)        | 148          | 150          |
| Kenya      | WASH-B (42)       | 1461         | 5165         |
| Madagascar | MAHAY (43)        | 1702         | 1685         |
| Zimbabwe   | SHINE (HIV-) (47) | 1869         | 1786         |
| Zimbabwe   | SHINE (HIV+) (48) | 336          | 328          |
|            |                   | <b>11156</b> | <b>14622</b> |

**I<sup>2</sup> = 0.42, Tau<sup>2</sup> = 0.00**

**Malaria prevalence – At least 10%**

|              |                  |             |             |
|--------------|------------------|-------------|-------------|
| Burkina Faso | iLiNS-Zinc (37)  | 1960        | 666         |
| Burkina Faso | PROMIS (38)      | 857         | 911         |
| Burkina Faso | PROMIS CS (38)   | 430         | 436         |
| Ghana        | GHANA (39)       | 98          | 96          |
| Ghana        | iLiNS-DYADG (40) | 347         | 693         |
| Malawi       | iLiNS-DYADM (44) | 220         | 444         |
| Malawi       | iLiNS-DOSE (45)  | 702         | 241         |
| Mali         | PROMIS (46)      | 500         | 502         |
| Mali         | PROMIS CS (46)   | 946         | 960         |
|              |                  | <b>6060</b> | <b>4949</b> |

**I<sup>2</sup> = 0.75, Tau<sup>2</sup> = 0.01**

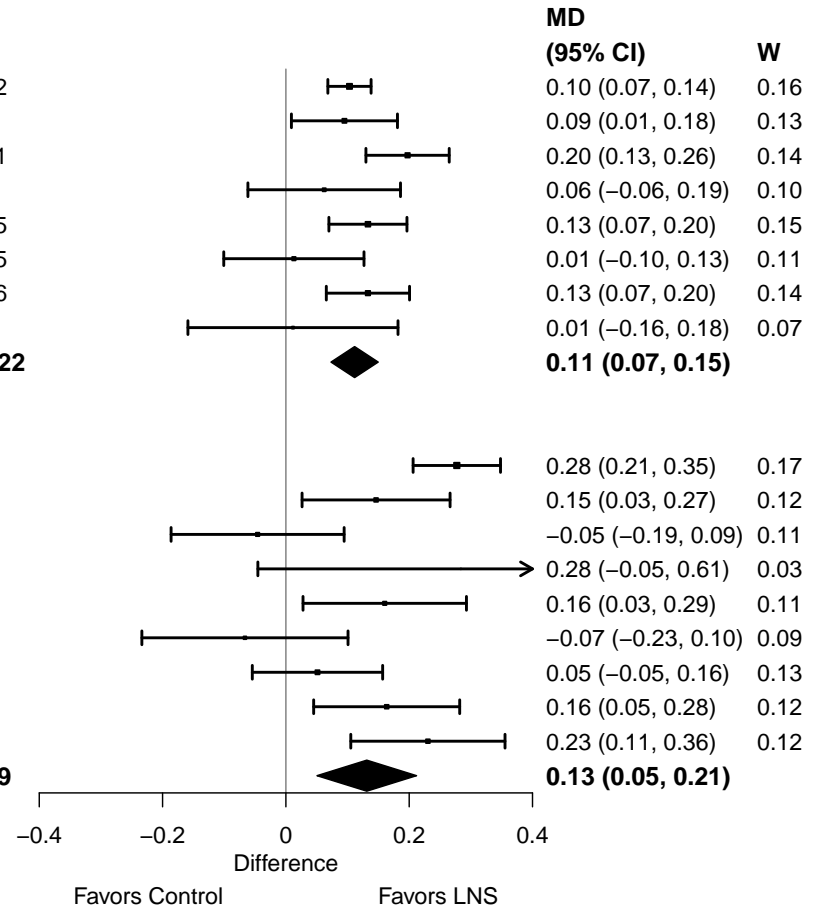

Supplemental figure 4L: Mean difference in WAZ

4L4: Stratified by Source water quality

**Source water quality**  
(p-diff = 0.814)

**Source water quality – Improved**

| Country                                             | Trial            | N    | N    | MD (95% CI)              | W    |
|-----------------------------------------------------|------------------|------|------|--------------------------|------|
| Bangladesh                                          | JiVitA-4 (34)    | 2814 | 1232 | 0.10 (0.07, 0.14)        | 0.20 |
| Bangladesh                                          | RDNS (35)        | 1663 | 815  | 0.09 (0.01, 0.18)        | 0.16 |
| Bangladesh                                          | WASH-B (36)      | 572  | 1119 | 0.25 (0.14, 0.37)        | 0.13 |
| Ghana                                               | GHANA (39)       | 98   | 96   | 0.28 (-0.05, 0.61)       | 0.04 |
| Ghana                                               | iLiNS-DYADG (40) | 347  | 693  | 0.16 (0.03, 0.29)        | 0.12 |
| Haiti                                               | HAITI (41)       | 148  | 150  | 0.06 (-0.06, 0.19)       | 0.12 |
| Malawi                                              | iLiNS-DYADM (44) | 220  | 444  | -0.07 (-0.23, 0.10)      | 0.09 |
| Malawi                                              | iLiNS-DOSE (45)  | 702  | 241  | 0.05 (-0.05, 0.16)       | 0.14 |
| <b>I<sup>2</sup> = 0.49, Tau<sup>2</sup> = 0.00</b> |                  |      |      | <b>0.11 (0.04, 0.17)</b> |      |

**Source water quality – Unimproved**

|                                                     |                   |      |      |                          |      |
|-----------------------------------------------------|-------------------|------|------|--------------------------|------|
| Burkina Faso                                        | iLiNS-Zinc (37)   | 1960 | 666  | 0.28 (0.21, 0.35)        | 0.15 |
| Burkina Faso                                        | PROMIS (38)       | 857  | 911  | 0.15 (0.03, 0.27)        | 0.11 |
| Burkina Faso                                        | PROMIS CS (38)    | 430  | 436  | -0.05 (-0.19, 0.09)      | 0.10 |
| Kenya                                               | WASH-B (42)       | 697  | 2261 | 0.09 (-0.01, 0.18)       | 0.13 |
| Madagascar                                          | MAHAY (43)        | 1702 | 1685 | 0.01 (-0.10, 0.13)       | 0.11 |
| Mali                                                | PROMIS (46)       | 500  | 502  | 0.16 (0.05, 0.28)        | 0.11 |
| Mali                                                | PROMIS CS (46)    | 946  | 960  | 0.23 (0.11, 0.36)        | 0.11 |
| Zimbabwe                                            | SHINE (HIV-) (47) | 887  | 876  | 0.07 (-0.02, 0.16)       | 0.13 |
| Zimbabwe                                            | SHINE (HIV+) (48) | 147  | 146  | 0.03 (-0.21, 0.26)       | 0.05 |
| <b>I<sup>2</sup> = 0.75, Tau<sup>2</sup> = 0.01</b> |                   |      |      | <b>0.12 (0.05, 0.19)</b> |      |

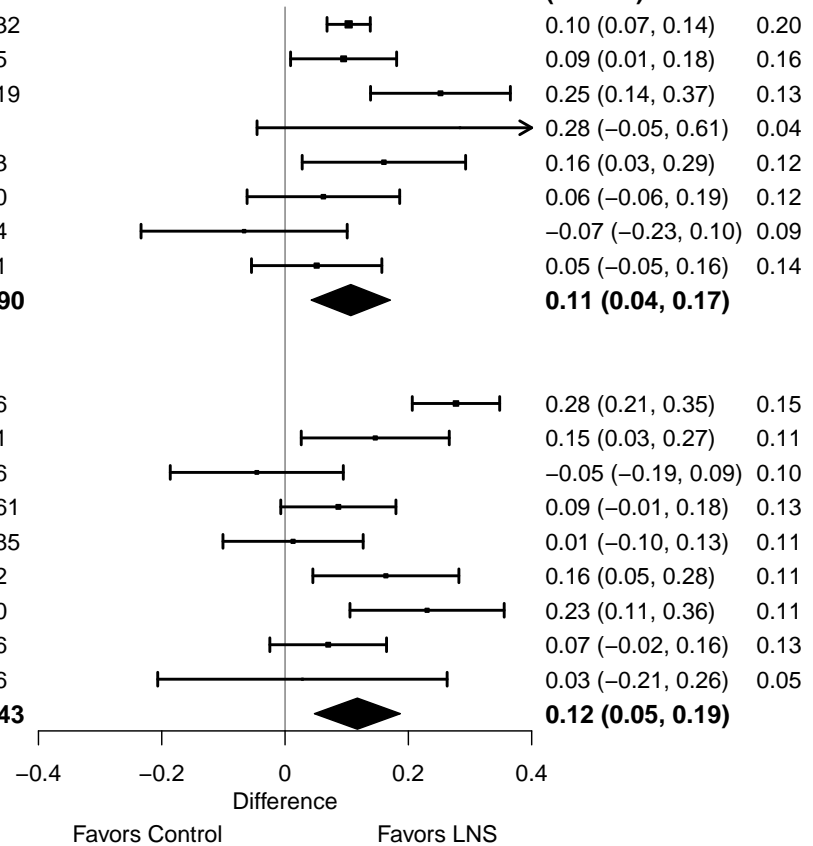



Supplemental figure 4L: Mean difference in WAZ

4L5: Stratified by Sanitation

**Sanitation**  
(p-diff = 0.301)

**Sanitation – Improved**

| Country                                             | Trial            | N                | N    | MD (95% CI)              | W    |
|-----------------------------------------------------|------------------|------------------|------|--------------------------|------|
| Bangladesh                                          | JiVitA-4 (34)    | 2814             | 1232 | 0.10 (0.07, 0.14)        | 0.16 |
| Bangladesh                                          | RDNS (35)        | 1663             | 815  | 0.09 (0.01, 0.18)        | 0.13 |
| Bangladesh                                          | WASH-B (36)      | 572              | 1119 | 0.25 (0.14, 0.37)        | 0.11 |
| Burkina Faso                                        | PROMIS (38)      | 857              | 911  | 0.15 (0.03, 0.27)        | 0.10 |
| Burkina Faso                                        | PROMIS CS (38)   | 430              | 436  | -0.05 (-0.19, 0.09)      | 0.09 |
| Ghana                                               | GHANA (39)       | 98               | 96   | 0.28 (-0.05, 0.61)       | 0.03 |
| Ghana                                               | iLiNS-DYADG (40) | 347              | 693  | 0.16 (0.03, 0.29)        | 0.09 |
| Haiti                                               | HAITI (41)       | 148              | 150  | 0.06 (-0.06, 0.19)       | 0.10 |
| Mali                                                | PROMIS (46)      | 500              | 502  | 0.16 (0.05, 0.28)        | 0.10 |
| Mali                                                | PROMIS CS (46)   | 946              | 960  | 0.23 (0.11, 0.36)        | 0.10 |
| <b>I<sup>2</sup> = 0.49, Tau<sup>2</sup> = 0.00</b> |                  | <b>8375 6914</b> |      | <b>0.13 (0.08, 0.19)</b> |      |

**Sanitation – Unimproved**

|                                                     |                   |                  |      |                          |      |
|-----------------------------------------------------|-------------------|------------------|------|--------------------------|------|
| Burkina Faso                                        | iLiNS-Zinc (37)   | 1960             | 666  | 0.28 (0.21, 0.35)        | 0.19 |
| Kenya                                               | WASH-B (42)       | 697              | 2261 | 0.09 (-0.01, 0.18)       | 0.17 |
| Madagascar                                          | MAHAY (43)        | 1702             | 1685 | 0.01 (-0.10, 0.13)       | 0.15 |
| Malawi                                              | iLiNS-DYADM (44)  | 220              | 444  | -0.07 (-0.23, 0.10)      | 0.10 |
| Malawi                                              | iLiNS-DOSE (45)   | 702              | 241  | 0.05 (-0.05, 0.16)       | 0.16 |
| Zimbabwe                                            | SHINE (HIV-) (47) | 887              | 876  | 0.07 (-0.02, 0.16)       | 0.17 |
| Zimbabwe                                            | SHINE (HIV+) (48) | 147              | 146  | 0.03 (-0.21, 0.26)       | 0.07 |
| <b>I<sup>2</sup> = 0.81, Tau<sup>2</sup> = 0.01</b> |                   | <b>6315 6319</b> |      | <b>0.08 (0.00, 0.16)</b> |      |

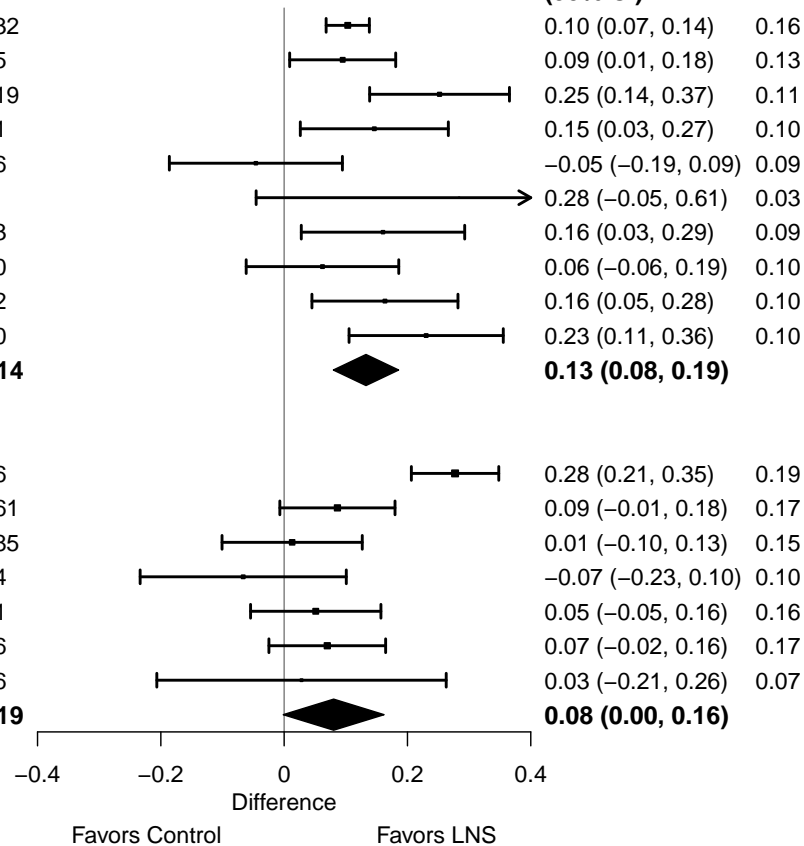

Supplemental figure 4L: Mean difference in WAZ

4L6: Stratified by Supplement duration

**Supplement duration**

(p-diff = 0.165)

**Supplement duration – 12m or less**

| Country      | Trial             | N            | N           |
|--------------|-------------------|--------------|-------------|
| Bangladesh   | JiVitA-4 (34)     | 2814         | 1232        |
| Burkina Faso | iLiNS-Zinc (37)   | 1960         | 666         |
| Burkina Faso | PROMIS (38)       | 857          | 911         |
| Burkina Faso | PROMIS CS (38)    | 430          | 436         |
| Ghana        | GHANA (39)        | 98           | 96          |
| Ghana        | iLiNS-DYADG (40)  | 347          | 693         |
| Haiti        | HAITI (41)        | 148          | 150         |
| Madagascar   | MAHAY (43)        | 1702         | 1685        |
| Malawi       | iLiNS-DYADM (44)  | 220          | 444         |
| Malawi       | iLiNS-DOSE (45)   | 702          | 241         |
| Zimbabwe     | SHINE (HIV-) (47) | 1869         | 1786        |
| Zimbabwe     | SHINE (HIV+) (48) | 336          | 328         |
|              |                   | <b>11483</b> | <b>8668</b> |

**I<sup>2</sup> = 0.72, Tau<sup>2</sup> = 0.01**

**Supplement duration – > 12m**

|            |                |             |              |
|------------|----------------|-------------|--------------|
| Bangladesh | RDNS (35)      | 1663        | 815          |
| Bangladesh | WASH-B (36)    | 1163        | 3461         |
| Kenya      | WASH-B (42)    | 1461        | 5165         |
| Mali       | PROMIS (46)    | 500         | 502          |
| Mali       | PROMIS CS (46) | 946         | 960          |
|            |                | <b>5733</b> | <b>10903</b> |

**I<sup>2</sup> = 0.24, Tau<sup>2</sup> = 0.00**

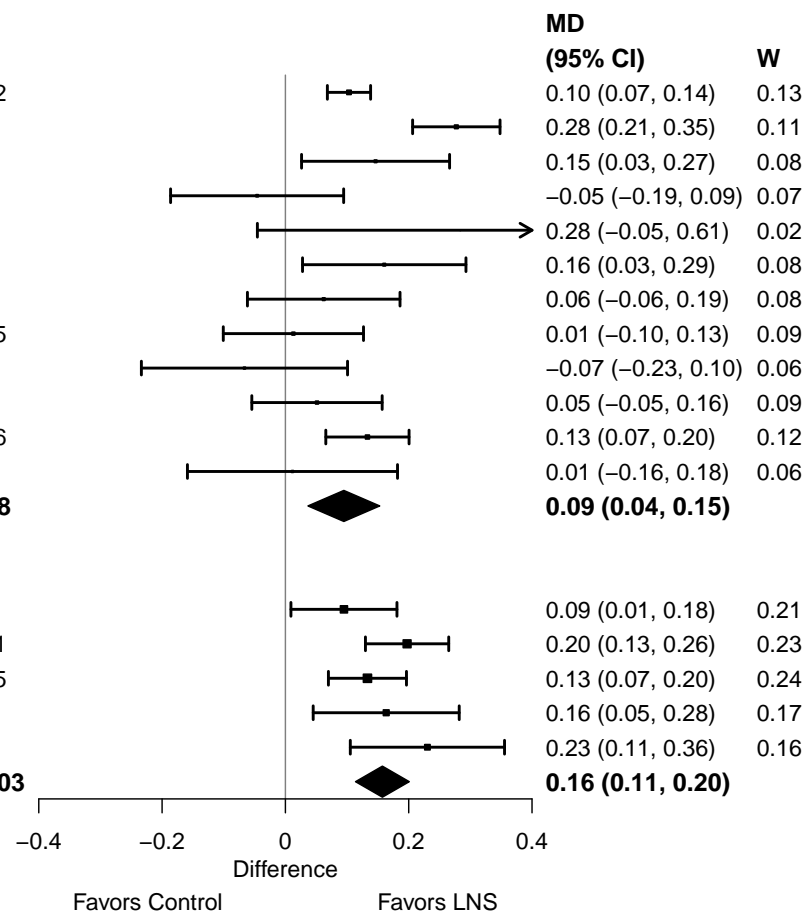

Supplemental figure 4L: Mean difference in WAZ

4L7: Stratified by Frequency of contact

**Frequency of contact**  
(p-diff = 0.339)

**Frequency of contact – Monthly**

| Country                                             | Trial             | N           | N            | MD<br>(95% CI)           | W    |
|-----------------------------------------------------|-------------------|-------------|--------------|--------------------------|------|
| Bangladesh                                          | RDNS (35)         | 1663        | 815          | 0.09 (0.01, 0.18)        | 0.12 |
| Burkina Faso                                        | PROMIS (38)       | 857         | 911          | 0.15 (0.03, 0.27)        | 0.09 |
| Burkina Faso                                        | PROMIS CS (38)    | 430         | 436          | -0.05 (-0.19, 0.09)      | 0.08 |
| Haiti                                               | HAITI (41)        | 148         | 150          | 0.06 (-0.06, 0.19)       | 0.09 |
| Kenya                                               | WASH-B (42)       | 1461        | 5165         | 0.13 (0.07, 0.20)        | 0.13 |
| Madagascar                                          | MAHAY (43)        | 1702        | 1685         | 0.01 (-0.10, 0.13)       | 0.10 |
| Mali                                                | PROMIS (46)       | 500         | 502          | 0.16 (0.05, 0.28)        | 0.09 |
| Mali                                                | PROMIS CS (46)    | 946         | 960          | 0.23 (0.11, 0.36)        | 0.09 |
| Zimbabwe                                            | SHINE (HIV-) (47) | 1869        | 1786         | 0.13 (0.07, 0.20)        | 0.13 |
| Zimbabwe                                            | SHINE (HIV+) (48) | 336         | 328          | 0.01 (-0.16, 0.18)       | 0.07 |
| <b>I<sup>2</sup> = 0.41, Tau<sup>2</sup> = 0.00</b> |                   | <b>9912</b> | <b>12738</b> | <b>0.10 (0.06, 0.15)</b> |      |

**Frequency of contact – Weekly**

|                                                     |                  |             |             |                          |      |
|-----------------------------------------------------|------------------|-------------|-------------|--------------------------|------|
| Bangladesh                                          | JiVitA-4 (34)    | 2814        | 1232        | 0.10 (0.07, 0.14)        | 0.22 |
| Bangladesh                                          | WASH-B (36)      | 1163        | 3461        | 0.20 (0.13, 0.26)        | 0.19 |
| Burkina Faso                                        | iLiNS-Zinc (37)  | 1960        | 666         | 0.28 (0.21, 0.35)        | 0.19 |
| Ghana                                               | GHANA (39)       | 98          | 96          | 0.28 (-0.05, 0.61)       | 0.04 |
| Ghana                                               | iLiNS-DYADG (40) | 347         | 693         | 0.16 (0.03, 0.29)        | 0.12 |
| Malawi                                              | iLiNS-DYADM (44) | 220         | 444         | -0.07 (-0.23, 0.10)      | 0.10 |
| Malawi                                              | iLiNS-DOSE (45)  | 702         | 241         | 0.05 (-0.05, 0.16)       | 0.15 |
| <b>I<sup>2</sup> = 0.81, Tau<sup>2</sup> = 0.01</b> |                  | <b>7304</b> | <b>6833</b> | <b>0.14 (0.06, 0.23)</b> |      |

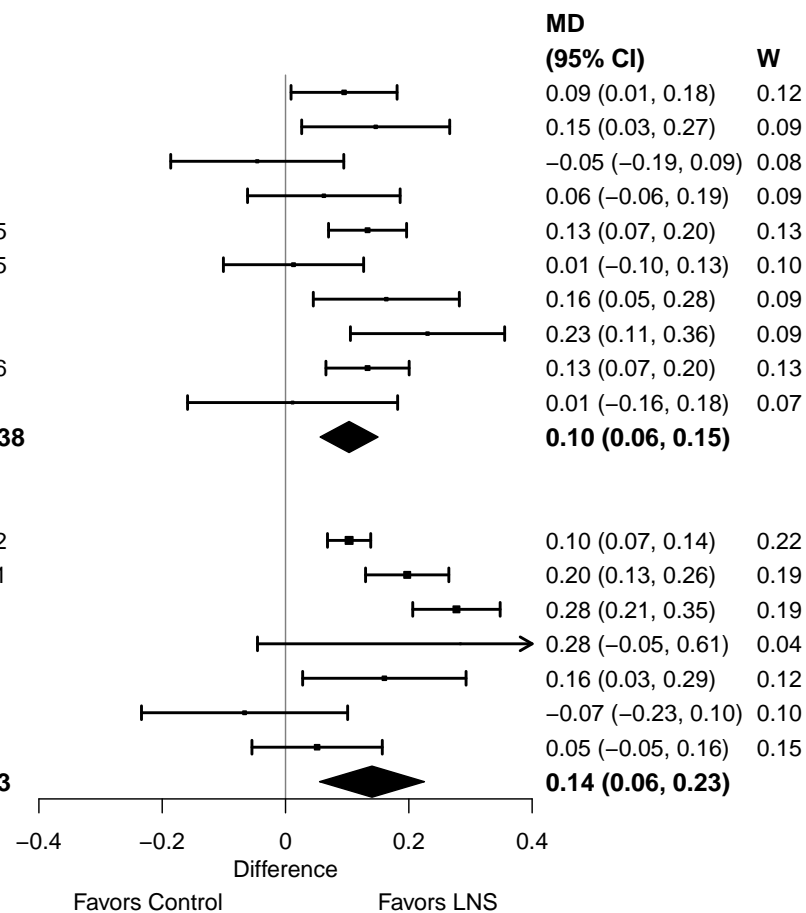

Supplemental figure 4L: Mean difference in WAZ

4L8: Stratified by Average SQ-LNS compliance

**Average SQ-LNS compliance**

(p-diff = 0.210)

**Average SQ-LNS compliance – Low**

| Country      | Trial             | N           | N           |
|--------------|-------------------|-------------|-------------|
| Burkina Faso | PROMIS (38)       | 857         | 911         |
| Burkina Faso | PROMIS CS (38)    | 430         | 436         |
| Ghana        | iLiNS-DYADG (40)  | 347         | 693         |
| Malawi       | iLiNS-DYADM (44)  | 220         | 444         |
| Malawi       | iLiNS-DOSE (45)   | 702         | 241         |
| Mali         | PROMIS (46)       | 500         | 502         |
| Mali         | PROMIS CS (46)    | 946         | 960         |
| Zimbabwe     | SHINE (HIV-) (47) | 1869        | 1786        |
| Zimbabwe     | SHINE (HIV+) (48) | 336         | 328         |
|              |                   | <b>6207</b> | <b>6301</b> |

**I<sup>2</sup> = 0.53, Tau<sup>2</sup> = 0.01**

**Average SQ-LNS compliance – High**

|              |                 |             |              |
|--------------|-----------------|-------------|--------------|
| Bangladesh   | JiVitA-4 (34)   | 2814        | 1232         |
| Bangladesh   | RDNS (35)       | 1663        | 815          |
| Bangladesh   | WASH-B (36)     | 1163        | 3461         |
| Burkina Faso | iLiNS-Zinc (37) | 1960        | 666          |
| Ghana        | GHANA (39)      | 98          | 96           |
| Haiti        | HAITI (41)      | 148         | 150          |
| Kenya        | WASH-B (42)     | 1461        | 5165         |
|              |                 | <b>9307</b> | <b>11585</b> |

**I<sup>2</sup> = 0.76, Tau<sup>2</sup> = 0.00**

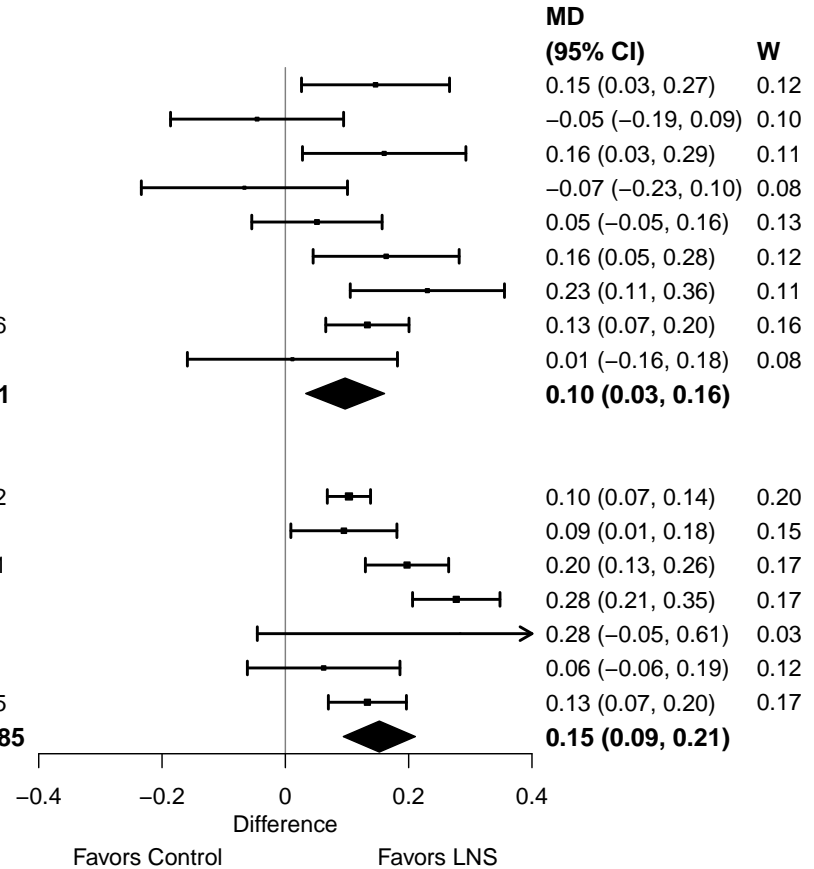

## Supplemental figure 4M: Underweight prevalence ratio

### 4M1: Stratified by Geographic region

#### Geographic region

(p-diff = 0.909)

#### Geographic region – SEAR

| Country                                             | Trial         | N           | N           |
|-----------------------------------------------------|---------------|-------------|-------------|
| Bangladesh                                          | JiVitA-4 (34) | 2814        | 1232        |
| Bangladesh                                          | RDNS (35)     | 1663        | 815         |
| Bangladesh                                          | WASH-B (36)   | 1163        | 3461        |
| <b>I<sup>2</sup> = 0.57, Tau<sup>2</sup> = 0.00</b> |               | <b>5640</b> | <b>5508</b> |

#### PR

| (95% CI)                 | W    |
|--------------------------|------|
| 0.91 (0.83, 1.01)        | 0.35 |
| 0.92 (0.83, 1.02)        | 0.34 |
| 0.79 (0.70, 0.89)        | 0.31 |
| <b>0.87 (0.79, 0.96)</b> |      |

#### Geographic region – AFR

|                                                     |                   |              |              |
|-----------------------------------------------------|-------------------|--------------|--------------|
| Burkina Faso                                        | iLiNS-Zinc (37)   | 1960         | 666          |
| Burkina Faso                                        | PROMIS (38)       | 857          | 911          |
| Burkina Faso                                        | PROMIS CS (38)    | 430          | 436          |
| Ghana                                               | GHANA (39)        | 98           | 96           |
| Ghana                                               | iLiNS-DYADG (40)  | 347          | 693          |
| Kenya                                               | WASH-B (42)       | 1461         | 5165         |
| Madagascar                                          | MAHAY (43)        | 1702         | 1685         |
| Malawi                                              | iLiNS-DYADM (44)  | 220          | 444          |
| Malawi                                              | iLiNS-DOSE (45)   | 702          | 241          |
| Mali                                                | PROMIS (46)       | 500          | 502          |
| Mali                                                | PROMIS CS (46)    | 946          | 960          |
| Zimbabwe                                            | SHINE (HIV-) (47) | 1869         | 1786         |
| Zimbabwe                                            | SHINE (HIV+) (48) | 336          | 328          |
| <b>I<sup>2</sup> = 0.47, Tau<sup>2</sup> = 0.01</b> |                   | <b>11428</b> | <b>13913</b> |

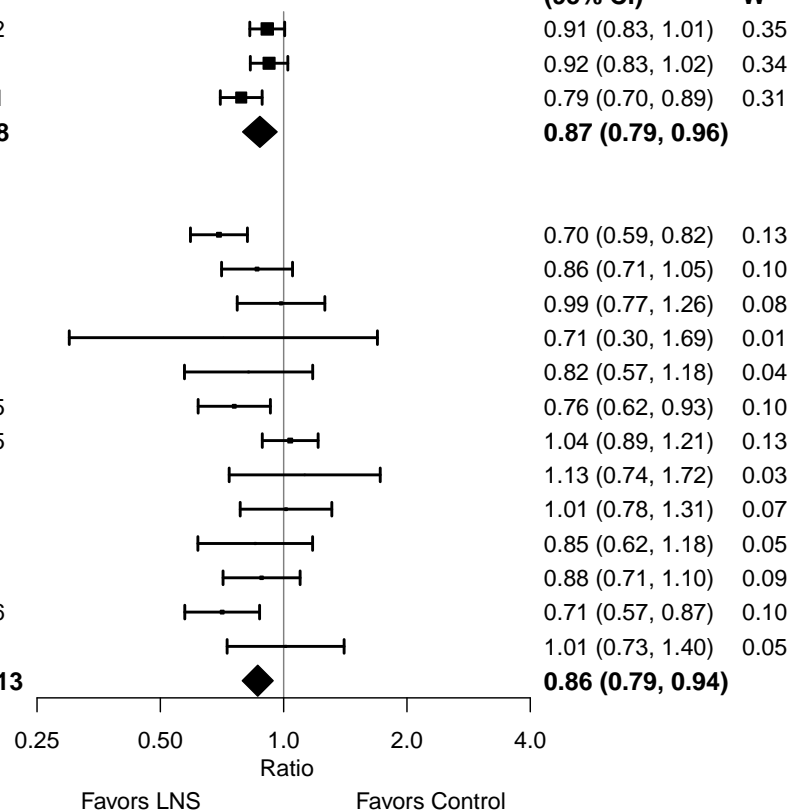

Supplemental figure 4M: Underweight prevalence ratio

4M2: Stratified by Stunting burden

**Stunting burden**

(p-diff = 0.979)

**Stunting burden – Less than 35%**

| Country                                             | Trial            | N           | N           |
|-----------------------------------------------------|------------------|-------------|-------------|
| Burkina Faso                                        | PROMIS (38)      | 857         | 911         |
| Burkina Faso                                        | PROMIS CS (38)   | 430         | 436         |
| Ghana                                               | GHANA (39)       | 98          | 96          |
| Ghana                                               | iLiNS-DYADG (40) | 347         | 693         |
| Haiti                                               | HAITI (41)       | 148         | 150         |
| Kenya                                               | WASH-B (42)      | 1461        | 5165        |
| Malawi                                              | iLiNS-DYADM (44) | 220         | 444         |
| <b>I<sup>2</sup> = 0.00, Tau<sup>2</sup> = 0.00</b> |                  | <b>3561</b> | <b>7895</b> |

**PR**

| (95% CI)                 | W    |
|--------------------------|------|
| 0.86 (0.71, 1.05)        | 0.28 |
| 0.99 (0.77, 1.26)        | 0.21 |
| 0.71 (0.30, 1.69)        | 0.02 |
| 0.82 (0.57, 1.18)        | 0.11 |
| 0.71 (0.28, 1.78)        | 0.02 |
| 0.76 (0.62, 0.93)        | 0.27 |
| 1.13 (0.74, 1.72)        | 0.09 |
| <b>0.86 (0.77, 0.96)</b> |      |

**Stunting burden – More than 35%**

|                                                     |                   |              |              |
|-----------------------------------------------------|-------------------|--------------|--------------|
| Bangladesh                                          | JiVitA-4 (34)     | 2814         | 1232         |
| Bangladesh                                          | RDNS (35)         | 1663         | 815          |
| Bangladesh                                          | WASH-B (36)       | 1163         | 3461         |
| Burkina Faso                                        | iLiNS-Zinc (37)   | 1960         | 666          |
| Madagascar                                          | MAHAY (43)        | 1702         | 1685         |
| Malawi                                              | iLiNS-DOSE (45)   | 702          | 241          |
| Mali                                                | PROMIS (46)       | 500          | 502          |
| Mali                                                | PROMIS CS (46)    | 946          | 960          |
| Zimbabwe                                            | SHINE (HIV-) (47) | 1869         | 1786         |
| Zimbabwe                                            | SHINE (HIV+) (48) | 336          | 328          |
| <b>I<sup>2</sup> = 0.61, Tau<sup>2</sup> = 0.01</b> |                   | <b>13655</b> | <b>11676</b> |

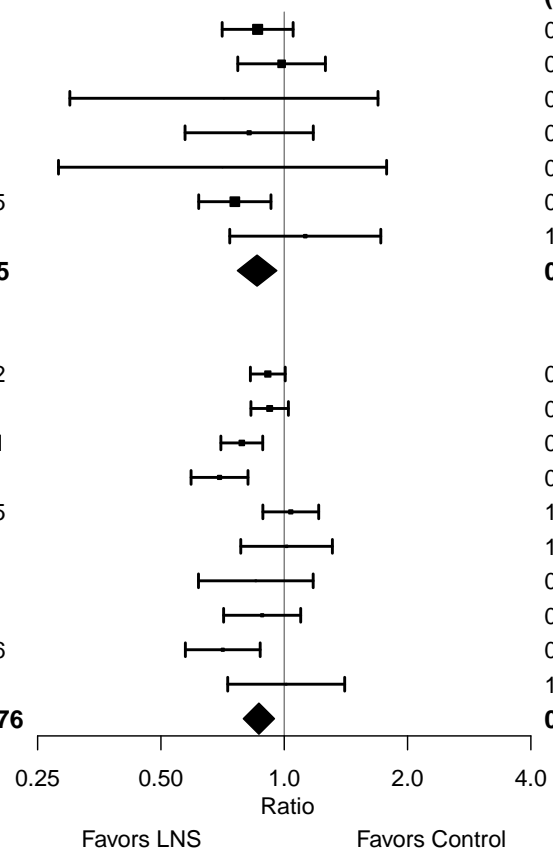

Supplemental figure 4M: Underweight prevalence ratio

4M3: Stratified by Malaria prevalence

**Malaria prevalence**

(p-diff = 0.998)

**Malaria prevalence – Less than 10%**

| Country    | Trial             | N            | N            |
|------------|-------------------|--------------|--------------|
| Bangladesh | JiVitA-4 (34)     | 2814         | 1232         |
| Bangladesh | RDNS (35)         | 1663         | 815          |
| Bangladesh | WASH-B (36)       | 1163         | 3461         |
| Haiti      | HAITI (41)        | 148          | 150          |
| Kenya      | WASH-B (42)       | 1461         | 5165         |
| Madagascar | MAHAY (43)        | 1702         | 1685         |
| Zimbabwe   | SHINE (HIV-) (47) | 1869         | 1786         |
| Zimbabwe   | SHINE (HIV+) (48) | 336          | 328          |
|            |                   | <b>11156</b> | <b>14622</b> |

**I<sup>2</sup> = 0.56, Tau<sup>2</sup> = 0.01**

**Malaria prevalence – At least 10%**

|              |                  |             |             |
|--------------|------------------|-------------|-------------|
| Burkina Faso | iLiNS-Zinc (37)  | 1960        | 666         |
| Burkina Faso | PROMIS (38)      | 857         | 911         |
| Burkina Faso | PROMIS CS (38)   | 430         | 436         |
| Ghana        | GHANA (39)       | 98          | 96          |
| Ghana        | iLiNS-DYADG (40) | 347         | 693         |
| Malawi       | iLiNS-DYADM (44) | 220         | 444         |
| Malawi       | iLiNS-DOSE (45)  | 702         | 241         |
| Mali         | PROMIS (46)      | 500         | 502         |
| Mali         | PROMIS CS (46)   | 946         | 960         |
|              |                  | <b>6060</b> | <b>4949</b> |

**I<sup>2</sup> = 0.29, Tau<sup>2</sup> = 0.00**

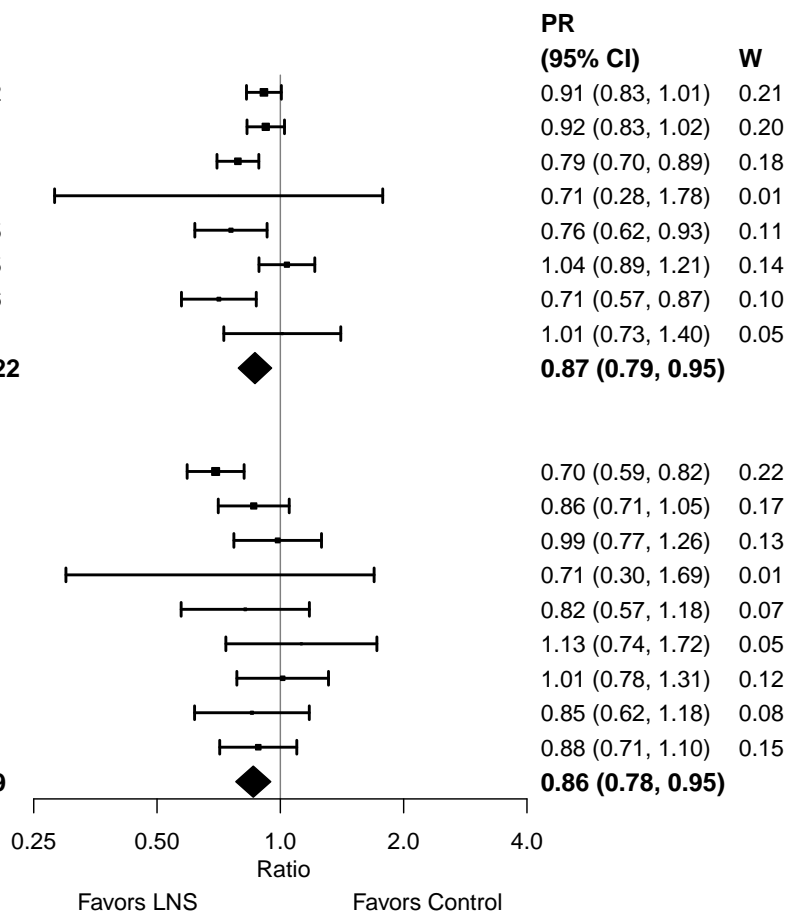

Supplemental figure 4M: Underweight prevalence ratio

4M4: Stratified by Source water quality

**Source water quality**

(p-diff = 0.601)

**Source water quality – Improved**

| Country                                             | Trial            | N           | N           | PR<br>(95% CI)           | W    |
|-----------------------------------------------------|------------------|-------------|-------------|--------------------------|------|
| Bangladesh                                          | JiVitA-4 (34)    | 2814        | 1232        | 0.91 (0.83, 1.01)        | 0.36 |
| Bangladesh                                          | RDNS (35)        | 1663        | 815         | 0.92 (0.83, 1.02)        | 0.33 |
| Bangladesh                                          | WASH-B (36)      | 572         | 1119        | 0.85 (0.73, 1.00)        | 0.17 |
| Ghana                                               | GHANA (39)       | 98          | 96          | 0.71 (0.30, 1.69)        | 0.01 |
| Ghana                                               | iLiNS-DYADG (40) | 347         | 693         | 0.82 (0.57, 1.18)        | 0.04 |
| Haiti                                               | HAITI (41)       | 148         | 150         | 0.71 (0.28, 1.78)        | 0.01 |
| Malawi                                              | iLiNS-DYADM (44) | 220         | 444         | 1.13 (0.74, 1.72)        | 0.03 |
| Malawi                                              | iLiNS-DOSE (45)  | 702         | 241         | 1.01 (0.78, 1.31)        | 0.07 |
| <b>I<sup>2</sup> = 0.00, Tau<sup>2</sup> = 0.00</b> |                  | <b>6564</b> | <b>4790</b> | <b>0.91 (0.86, 0.97)</b> |      |

**Source water quality – Unimproved**

|                                                     |                   |             |             |                          |      |
|-----------------------------------------------------|-------------------|-------------|-------------|--------------------------|------|
| Burkina Faso                                        | iLiNS-Zinc (37)   | 1960        | 666         | 0.70 (0.59, 0.82)        | 0.21 |
| Burkina Faso                                        | PROMIS (38)       | 857         | 911         | 0.86 (0.71, 1.05)        | 0.14 |
| Burkina Faso                                        | PROMIS CS (38)    | 430         | 436         | 0.99 (0.77, 1.26)        | 0.10 |
| Kenya                                               | WASH-B (42)       | 697         | 2261        | 0.89 (0.65, 1.23)        | 0.06 |
| Madagascar                                          | MAHAY (43)        | 1702        | 1685        | 1.04 (0.89, 1.21)        | 0.22 |
| Mali                                                | PROMIS (46)       | 500         | 502         | 0.85 (0.62, 1.18)        | 0.06 |
| Mali                                                | PROMIS CS (46)    | 946         | 960         | 0.88 (0.71, 1.10)        | 0.12 |
| Zimbabwe                                            | SHINE (HIV-) (47) | 887         | 876         | 0.86 (0.64, 1.14)        | 0.07 |
| Zimbabwe                                            | SHINE (HIV+) (48) | 147         | 146         | 1.03 (0.64, 1.69)        | 0.03 |
| <b>I<sup>2</sup> = 0.43, Tau<sup>2</sup> = 0.01</b> |                   | <b>8126</b> | <b>8443</b> | <b>0.88 (0.80, 0.96)</b> |      |

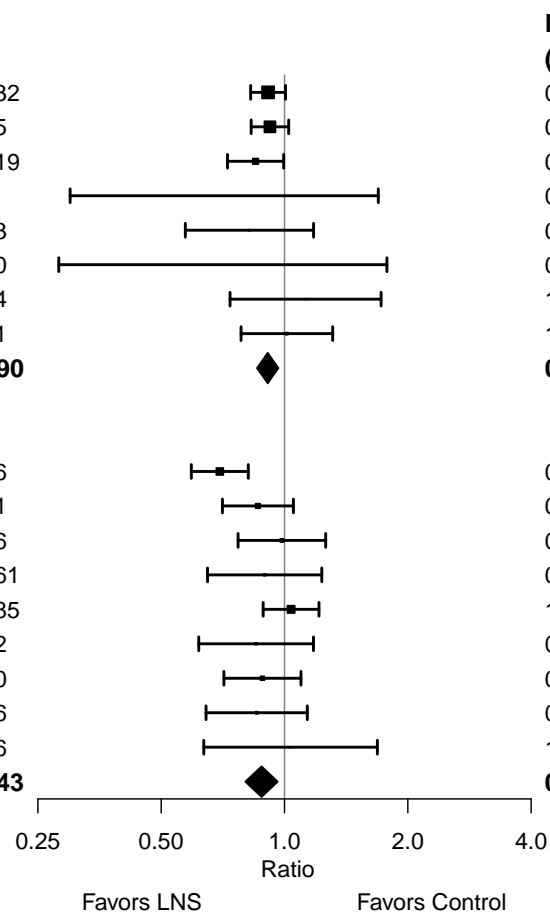



Supplemental figure 4M: Underweight prevalence ratio

4M5: Stratified by Sanitation

**Sanitation**  
(p-diff = 0.873)

**Sanitation – Improved**

| Country                                             | Trial            | N           | N           | PR (95% CI)              | W    |
|-----------------------------------------------------|------------------|-------------|-------------|--------------------------|------|
| Bangladesh                                          | JiVitA-4 (34)    | 2814        | 1232        | 0.91 (0.83, 1.01)        | 0.30 |
| Bangladesh                                          | RDNS (35)        | 1663        | 815         | 0.92 (0.83, 1.02)        | 0.27 |
| Bangladesh                                          | WASH-B (36)      | 572         | 1119        | 0.85 (0.73, 1.00)        | 0.14 |
| Burkina Faso                                        | PROMIS (38)      | 857         | 911         | 0.86 (0.71, 1.05)        | 0.09 |
| Burkina Faso                                        | PROMIS CS (38)   | 430         | 436         | 0.99 (0.77, 1.26)        | 0.06 |
| Ghana                                               | GHANA (39)       | 98          | 96          | 0.71 (0.30, 1.69)        | 0.01 |
| Ghana                                               | iLiNS-DYADG (40) | 347         | 693         | 0.82 (0.57, 1.18)        | 0.03 |
| Haiti                                               | HAITI (41)       | 148         | 150         | 0.71 (0.28, 1.78)        | 0.00 |
| Mali                                                | PROMIS (46)      | 500         | 502         | 0.85 (0.62, 1.18)        | 0.04 |
| Mali                                                | PROMIS CS (46)   | 946         | 960         | 0.88 (0.71, 1.10)        | 0.08 |
| <b>I<sup>2</sup> = 0.00, Tau<sup>2</sup> = 0.00</b> |                  | <b>8375</b> | <b>6914</b> | <b>0.90 (0.85, 0.95)</b> |      |

**Sanitation – Unimproved**

|                                                     |                   |             |             |                          |      |
|-----------------------------------------------------|-------------------|-------------|-------------|--------------------------|------|
| Burkina Faso                                        | iLiNS-Zinc (37)   | 1960        | 666         | 0.70 (0.59, 0.82)        | 0.30 |
| Kenya                                               | WASH-B (42)       | 697         | 2261        | 0.89 (0.65, 1.23)        | 0.08 |
| Madagascar                                          | MAHAY (43)        | 1702        | 1685        | 1.04 (0.89, 1.21)        | 0.31 |
| Malawi                                              | iLiNS-DYADM (44)  | 220         | 444         | 1.13 (0.74, 1.72)        | 0.05 |
| Malawi                                              | iLiNS-DOSE (45)   | 702         | 241         | 1.01 (0.78, 1.31)        | 0.12 |
| Zimbabwe                                            | SHINE (HIV-) (47) | 887         | 876         | 0.86 (0.64, 1.14)        | 0.10 |
| Zimbabwe                                            | SHINE (HIV+) (48) | 147         | 146         | 1.03 (0.64, 1.69)        | 0.04 |
| <b>I<sup>2</sup> = 0.61, Tau<sup>2</sup> = 0.01</b> |                   | <b>6315</b> | <b>6319</b> | <b>0.91 (0.80, 1.04)</b> |      |

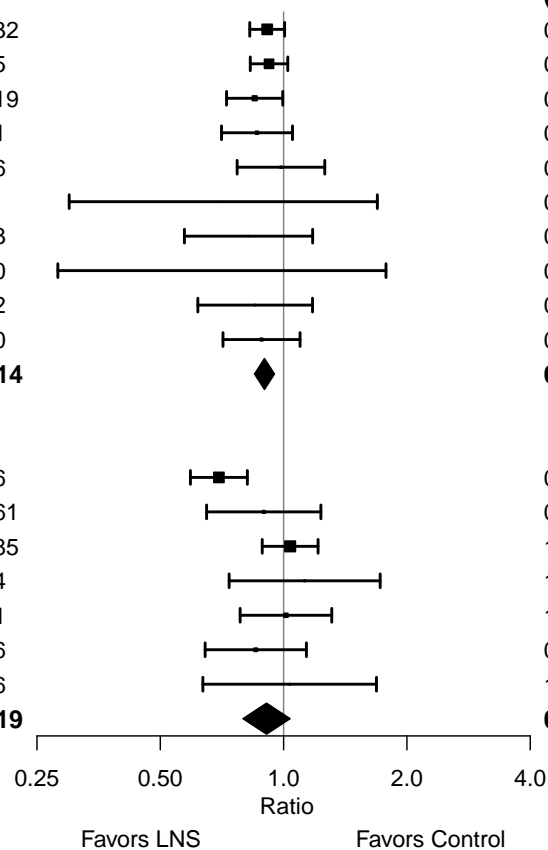

Supplemental figure 4M: Underweight prevalence ratio

4M6: Stratified by Supplement duration

**Supplement duration**

(p-diff = 0.519)

**Supplement duration – 12m or less**

| Country                                             | Trial             | N            | N           | PR<br>(95% CI)           | W    |
|-----------------------------------------------------|-------------------|--------------|-------------|--------------------------|------|
| Bangladesh                                          | JiVitA-4 (34)     | 2814         | 1232        | 0.91 (0.83, 1.01)        | 0.21 |
| Burkina Faso                                        | iLiNS-Zinc (37)   | 1960         | 666         | 0.70 (0.59, 0.82)        | 0.14 |
| Burkina Faso                                        | PROMIS (38)       | 857          | 911         | 0.86 (0.71, 1.05)        | 0.11 |
| Burkina Faso                                        | PROMIS CS (38)    | 430          | 436         | 0.99 (0.77, 1.26)        | 0.08 |
| Ghana                                               | GHANA (39)        | 98           | 96          | 0.71 (0.30, 1.69)        | 0.01 |
| Ghana                                               | iLiNS-DYADG (40)  | 347          | 693         | 0.82 (0.57, 1.18)        | 0.04 |
| Haiti                                               | HAITI (41)        | 148          | 150         | 0.71 (0.28, 1.78)        | 0.01 |
| Madagascar                                          | MAHAY (43)        | 1702         | 1685        | 1.04 (0.89, 1.21)        | 0.14 |
| Malawi                                              | iLiNS-DYADM (44)  | 220          | 444         | 1.13 (0.74, 1.72)        | 0.03 |
| Malawi                                              | iLiNS-DOSE (45)   | 702          | 241         | 1.01 (0.78, 1.31)        | 0.08 |
| Zimbabwe                                            | SHINE (HIV-) (47) | 1869         | 1786        | 0.71 (0.57, 0.87)        | 0.10 |
| Zimbabwe                                            | SHINE (HIV+) (48) | 336          | 328         | 1.01 (0.73, 1.40)        | 0.05 |
| <b>I<sup>2</sup> = 0.49, Tau<sup>2</sup> = 0.01</b> |                   | <b>11483</b> | <b>8668</b> | <b>0.88 (0.81, 0.97)</b> |      |

**Supplement duration – > 12m**

|                                                     |                |             |              |                          |      |
|-----------------------------------------------------|----------------|-------------|--------------|--------------------------|------|
| Bangladesh                                          | RDNS (35)      | 1663        | 815          | 0.92 (0.83, 1.02)        | 0.31 |
| Bangladesh                                          | WASH-B (36)    | 1163        | 3461         | 0.79 (0.70, 0.89)        | 0.29 |
| Kenya                                               | WASH-B (42)    | 1461        | 5165         | 0.76 (0.62, 0.93)        | 0.16 |
| Mali                                                | PROMIS (46)    | 500         | 502          | 0.85 (0.62, 1.18)        | 0.08 |
| Mali                                                | PROMIS CS (46) | 946         | 960          | 0.88 (0.71, 1.10)        | 0.15 |
| <b>I<sup>2</sup> = 0.23, Tau<sup>2</sup> = 0.00</b> |                | <b>5733</b> | <b>10903</b> | <b>0.85 (0.78, 0.91)</b> |      |

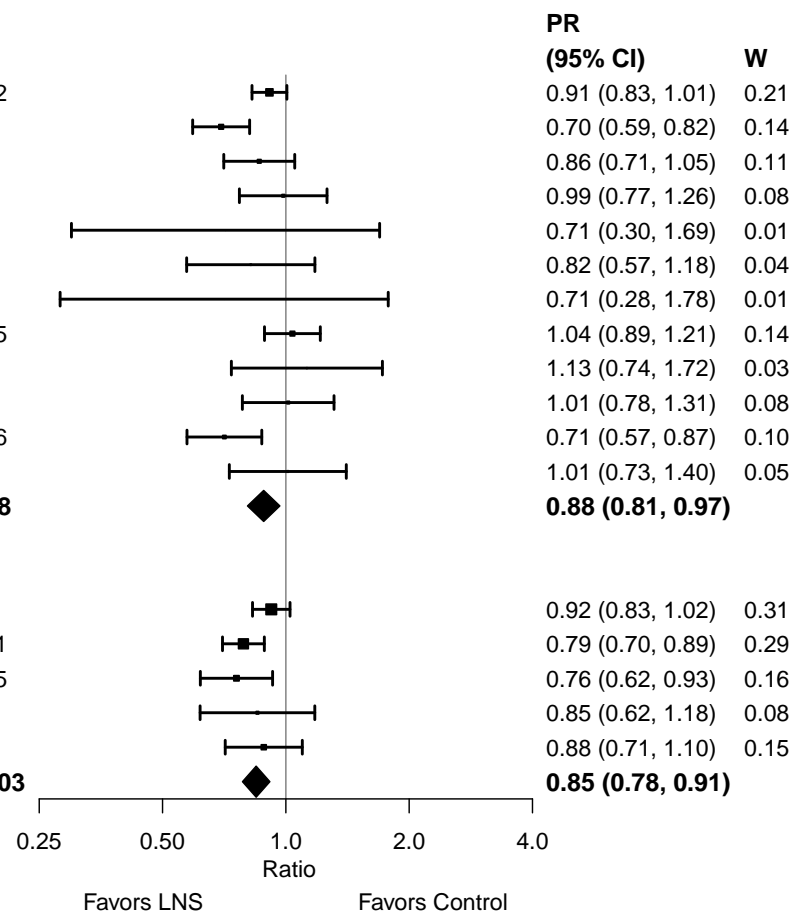

Supplemental figure 4M: Underweight prevalence ratio

4M7: Stratified by Frequency of contact

Frequency of contact

(p-diff = 0.516)

Frequency of contact – Monthly

| Country                                             | Trial             | N           | N            | PR<br>(95% CI)           | W    |
|-----------------------------------------------------|-------------------|-------------|--------------|--------------------------|------|
| Bangladesh                                          | RDNS (35)         | 1663        | 815          | 0.92 (0.83, 1.02)        | 0.21 |
| Burkina Faso                                        | PROMIS (38)       | 857         | 911          | 0.86 (0.71, 1.05)        | 0.11 |
| Burkina Faso                                        | PROMIS CS (38)    | 430         | 436          | 0.99 (0.77, 1.26)        | 0.09 |
| Haiti                                               | HAITI (41)        | 148         | 150          | 0.71 (0.28, 1.78)        | 0.01 |
| Kenya                                               | WASH-B (42)       | 1461        | 5165         | 0.76 (0.62, 0.93)        | 0.11 |
| Madagascar                                          | MAHAY (43)        | 1702        | 1685         | 1.04 (0.89, 1.21)        | 0.15 |
| Mali                                                | PROMIS (46)       | 500         | 502          | 0.85 (0.62, 1.18)        | 0.06 |
| Mali                                                | PROMIS CS (46)    | 946         | 960          | 0.88 (0.71, 1.10)        | 0.10 |
| Zimbabwe                                            | SHINE (HIV-) (47) | 1869        | 1786         | 0.71 (0.57, 0.87)        | 0.11 |
| Zimbabwe                                            | SHINE (HIV+) (48) | 336         | 328          | 1.01 (0.73, 1.40)        | 0.05 |
| <b>I<sup>2</sup> = 0.29, Tau<sup>2</sup> = 0.00</b> |                   | <b>9912</b> | <b>12738</b> | <b>0.89 (0.82, 0.96)</b> |      |

Frequency of contact – Weekly

|                                                     |                  |             |             |                          |      |
|-----------------------------------------------------|------------------|-------------|-------------|--------------------------|------|
| Bangladesh                                          | JiVitA-4 (34)    | 2814        | 1232        | 0.91 (0.83, 1.01)        | 0.30 |
| Bangladesh                                          | WASH-B (36)      | 1163        | 3461        | 0.79 (0.70, 0.89)        | 0.27 |
| Burkina Faso                                        | iLiNS-Zinc (37)  | 1960        | 666         | 0.70 (0.59, 0.82)        | 0.20 |
| Ghana                                               | GHANA (39)       | 98          | 96          | 0.71 (0.30, 1.69)        | 0.01 |
| Ghana                                               | iLiNS-DYADG (40) | 347         | 693         | 0.82 (0.57, 1.18)        | 0.06 |
| Malawi                                              | iLiNS-DYADM (44) | 220         | 444         | 1.13 (0.74, 1.72)        | 0.05 |
| Malawi                                              | iLiNS-DOSE (45)  | 702         | 241         | 1.01 (0.78, 1.31)        | 0.11 |
| <b>I<sup>2</sup> = 0.55, Tau<sup>2</sup> = 0.01</b> |                  | <b>7304</b> | <b>6833</b> | <b>0.84 (0.75, 0.94)</b> |      |

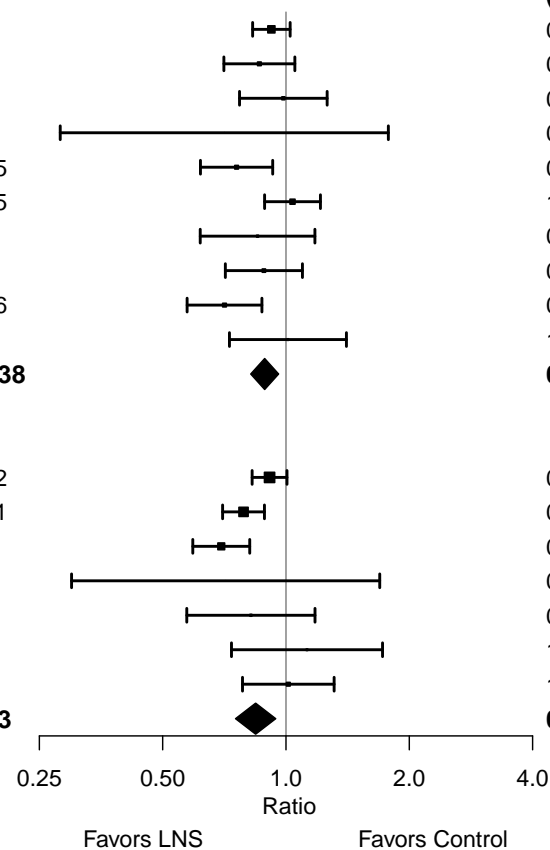

Supplemental figure 4M: Underweight prevalence ratio

4M8: Stratified by Average SQ-LNS compliance

**Average SQ-LNS compliance**  
(p-diff = 0.272)

**Average SQ-LNS compliance – Low**

| Country      | Trial             | N           | N           | PR (95% CI)              | W    |
|--------------|-------------------|-------------|-------------|--------------------------|------|
| Burkina Faso | PROMIS (38)       | 857         | 911         | 0.86 (0.71, 1.05)        | 0.17 |
| Burkina Faso | PROMIS CS (38)    | 430         | 436         | 0.99 (0.77, 1.26)        | 0.13 |
| Ghana        | iLiNS-DYADG (40)  | 347         | 693         | 0.82 (0.57, 1.18)        | 0.07 |
| Malawi       | iLiNS-DYADM (44)  | 220         | 444         | 1.13 (0.74, 1.72)        | 0.05 |
| Malawi       | iLiNS-DOSE (45)   | 702         | 241         | 1.01 (0.78, 1.31)        | 0.12 |
| Mali         | PROMIS (46)       | 500         | 502         | 0.85 (0.62, 1.18)        | 0.08 |
| Mali         | PROMIS CS (46)    | 946         | 960         | 0.88 (0.71, 1.10)        | 0.15 |
| Zimbabwe     | SHINE (HIV-) (47) | 1869        | 1786        | 0.71 (0.57, 0.87)        | 0.16 |
| Zimbabwe     | SHINE (HIV+) (48) | 336         | 328         | 1.01 (0.73, 1.40)        | 0.08 |
|              |                   | <b>6207</b> | <b>6301</b> | <b>0.88 (0.81, 0.97)</b> |      |

**Average SQ-LNS compliance – High**

|              |                 |             |              |                          |      |
|--------------|-----------------|-------------|--------------|--------------------------|------|
| Bangladesh   | JiVitA-4 (34)   | 2814        | 1232         | 0.91 (0.83, 1.01)        | 0.26 |
| Bangladesh   | RDNS (35)       | 1663        | 815          | 0.92 (0.83, 1.02)        | 0.24 |
| Bangladesh   | WASH-B (36)     | 1163        | 3461         | 0.79 (0.70, 0.89)        | 0.22 |
| Burkina Faso | iLiNS-Zinc (37) | 1960        | 666          | 0.70 (0.59, 0.82)        | 0.15 |
| Ghana        | GHANA (39)      | 98          | 96           | 0.71 (0.30, 1.69)        | 0.01 |
| Haiti        | HAITI (41)      | 148         | 150          | 0.71 (0.28, 1.78)        | 0.01 |
| Kenya        | WASH-B (42)     | 1461        | 5165         | 0.76 (0.62, 0.93)        | 0.11 |
|              |                 | <b>9307</b> | <b>11585</b> | <b>0.82 (0.76, 0.90)</b> |      |

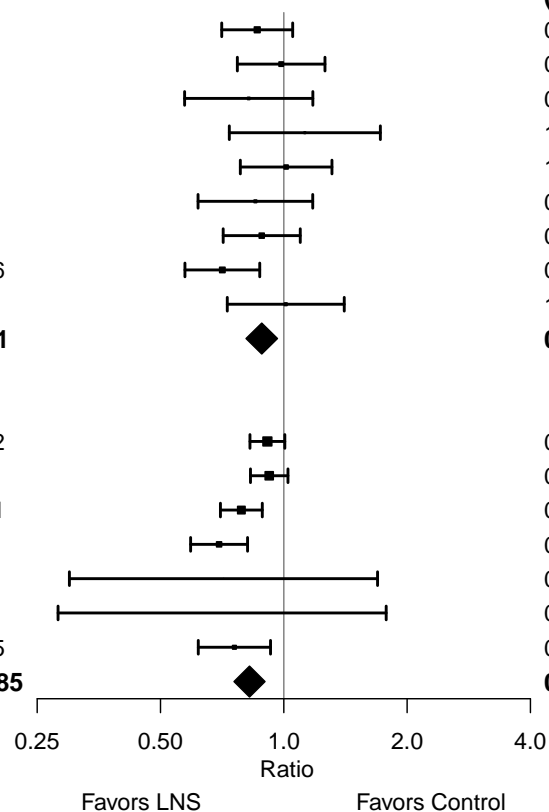

## Supplemental figure 4N: Underweight prevalence difference

### 4N1: Stratified by Geographic region

#### Geographic region

( $p$ -diff = 0.198)

#### Geographic region – SEAR

| Country    | Trial         | N           | N           |
|------------|---------------|-------------|-------------|
| Bangladesh | JiVitA-4 (34) | 2814        | 1232        |
| Bangladesh | RDNS (35)     | 1663        | 815         |
| Bangladesh | WASH-B (36)   | 1163        | 3461        |
|            |               | <b>5640</b> | <b>5508</b> |

$I^2 = 0.31$ ,  $\text{Tau}^2 = 0.00$

#### Geographic region – AFR

|              |                   |              |              |
|--------------|-------------------|--------------|--------------|
| Burkina Faso | iLiNS-Zinc (37)   | 1960         | 666          |
| Burkina Faso | PROMIS (38)       | 857          | 911          |
| Burkina Faso | PROMIS CS (38)    | 430          | 436          |
| Ghana        | GHANA (39)        | 98           | 96           |
| Ghana        | iLiNS-DYADG (40)  | 347          | 693          |
| Kenya        | WASH-B (42)       | 1461         | 5165         |
| Madagascar   | MAHAY (43)        | 1702         | 1685         |
| Malawi       | iLiNS-DYADM (44)  | 220          | 444          |
| Malawi       | iLiNS-DOSE (45)   | 702          | 241          |
| Mali         | PROMIS (46)       | 500          | 502          |
| Mali         | PROMIS CS (46)    | 946          | 960          |
| Zimbabwe     | SHINE (HIV-) (47) | 1869         | 1786         |
| Zimbabwe     | SHINE (HIV+) (48) | 336          | 328          |
|              |                   | <b>11428</b> | <b>13913</b> |

$I^2 = 0.61$ ,  $\text{Tau}^2 = 0.00$

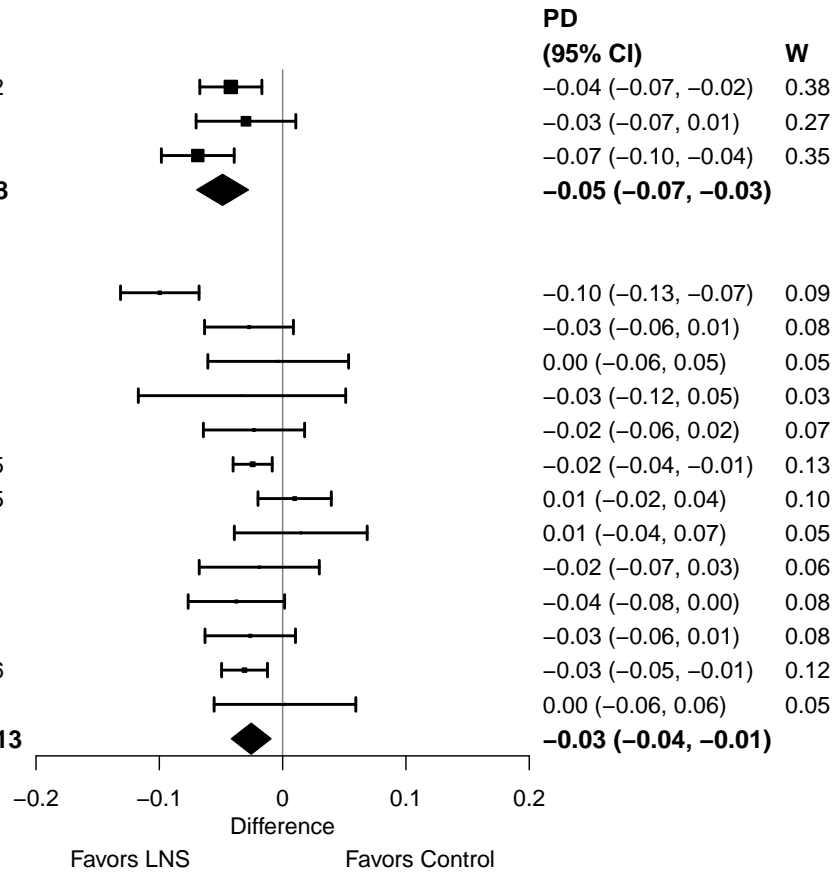

Supplemental figure 4N: Underweight prevalence difference

4N2: Stratified by Stunting burden

**Stunting burden**

(p-diff = 0.149)

**Stunting burden – Less than 35%**

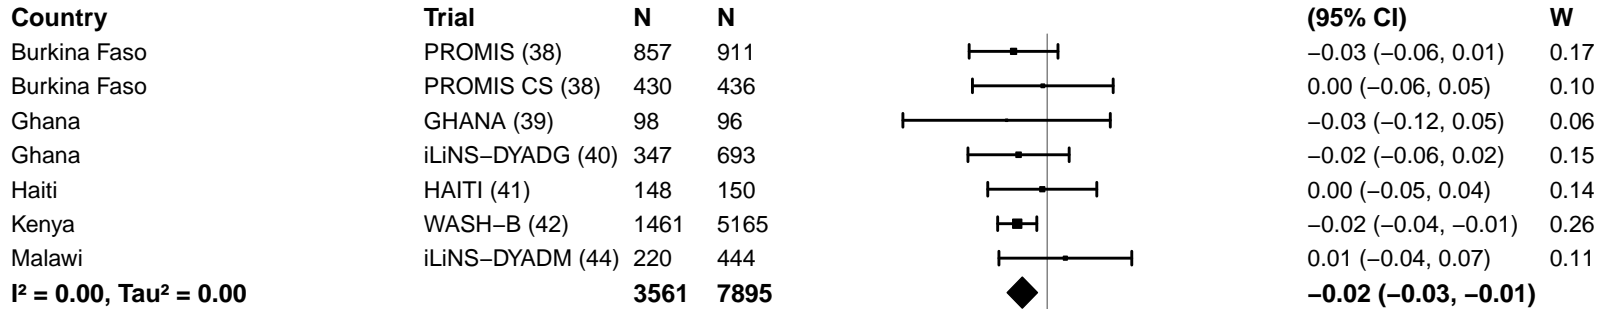

**Stunting burden – More than 35%**

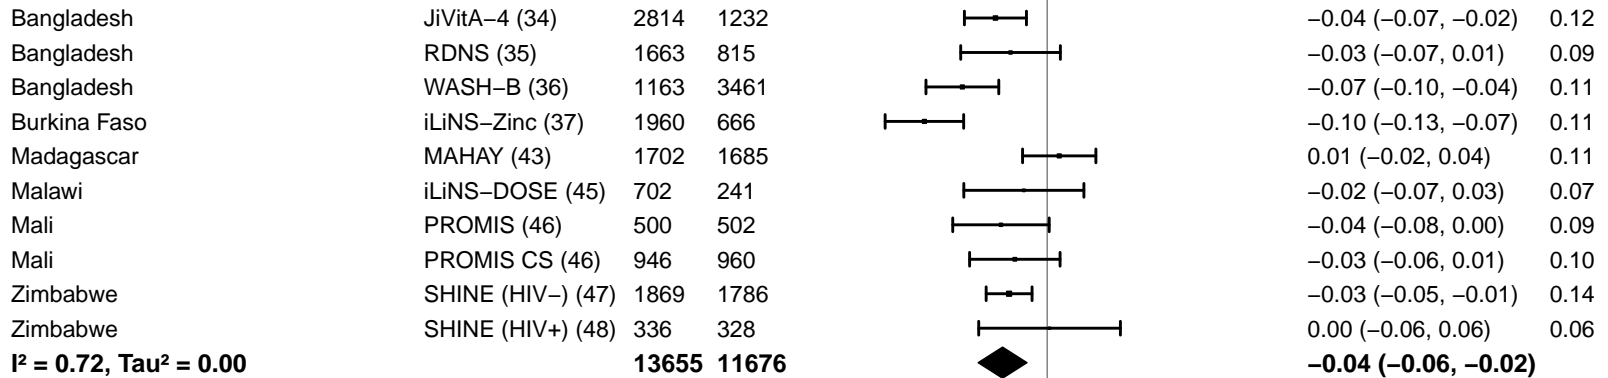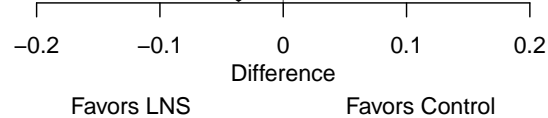

Supplemental figure 4N: Underweight prevalence difference

4N3: Stratified by Malaria prevalence

**Malaria prevalence**

(p-diff = 0.671)

**Malaria prevalence – Less than 10%**

| Country                                             | Trial             | N            | N            | PD<br>(95% CI)              | W    |
|-----------------------------------------------------|-------------------|--------------|--------------|-----------------------------|------|
| Bangladesh                                          | JiVitA-4 (34)     | 2814         | 1232         | -0.04 (-0.07, -0.02)        | 0.14 |
| Bangladesh                                          | RDNS (35)         | 1663         | 815          | -0.03 (-0.07, 0.01)         | 0.10 |
| Bangladesh                                          | WASH-B (36)       | 1163         | 3461         | -0.07 (-0.10, -0.04)        | 0.13 |
| Haiti                                               | HAITI (41)        | 148          | 150          | 0.00 (-0.05, 0.04)          | 0.09 |
| Kenya                                               | WASH-B (42)       | 1461         | 5165         | -0.02 (-0.04, -0.01)        | 0.17 |
| Madagascar                                          | MAHAY (43)        | 1702         | 1685         | 0.01 (-0.02, 0.04)          | 0.13 |
| Zimbabwe                                            | SHINE (HIV-) (47) | 1869         | 1786         | -0.03 (-0.05, -0.01)        | 0.16 |
| Zimbabwe                                            | SHINE (HIV+) (48) | 336          | 328          | 0.00 (-0.06, 0.06)          | 0.07 |
| <b>I<sup>2</sup> = 0.59, Tau<sup>2</sup> = 0.00</b> |                   | <b>11156</b> | <b>14622</b> | <b>-0.03 (-0.04, -0.01)</b> |      |

**Malaria prevalence – At least 10%**

|                                                     |                  |             |             |                             |      |
|-----------------------------------------------------|------------------|-------------|-------------|-----------------------------|------|
| Burkina Faso                                        | iLiNS-Zinc (37)  | 1960        | 666         | -0.10 (-0.13, -0.07)        | 0.15 |
| Burkina Faso                                        | PROMIS (38)      | 857         | 911         | -0.03 (-0.06, 0.01)         | 0.14 |
| Burkina Faso                                        | PROMIS CS (38)   | 430         | 436         | 0.00 (-0.06, 0.05)          | 0.08 |
| Ghana                                               | GHANA (39)       | 98          | 96          | -0.03 (-0.12, 0.05)         | 0.05 |
| Ghana                                               | iLiNS-DYADG (40) | 347         | 693         | -0.02 (-0.06, 0.02)         | 0.12 |
| Malawi                                              | iLiNS-DYADM (44) | 220         | 444         | 0.01 (-0.04, 0.07)          | 0.09 |
| Malawi                                              | iLiNS-DOSE (45)  | 702         | 241         | -0.02 (-0.07, 0.03)         | 0.10 |
| Mali                                                | PROMIS (46)      | 500         | 502         | -0.04 (-0.08, 0.00)         | 0.13 |
| Mali                                                | PROMIS CS (46)   | 946         | 960         | -0.03 (-0.06, 0.01)         | 0.14 |
| <b>I<sup>2</sup> = 0.62, Tau<sup>2</sup> = 0.00</b> |                  | <b>6060</b> | <b>4949</b> | <b>-0.03 (-0.05, -0.01)</b> |      |

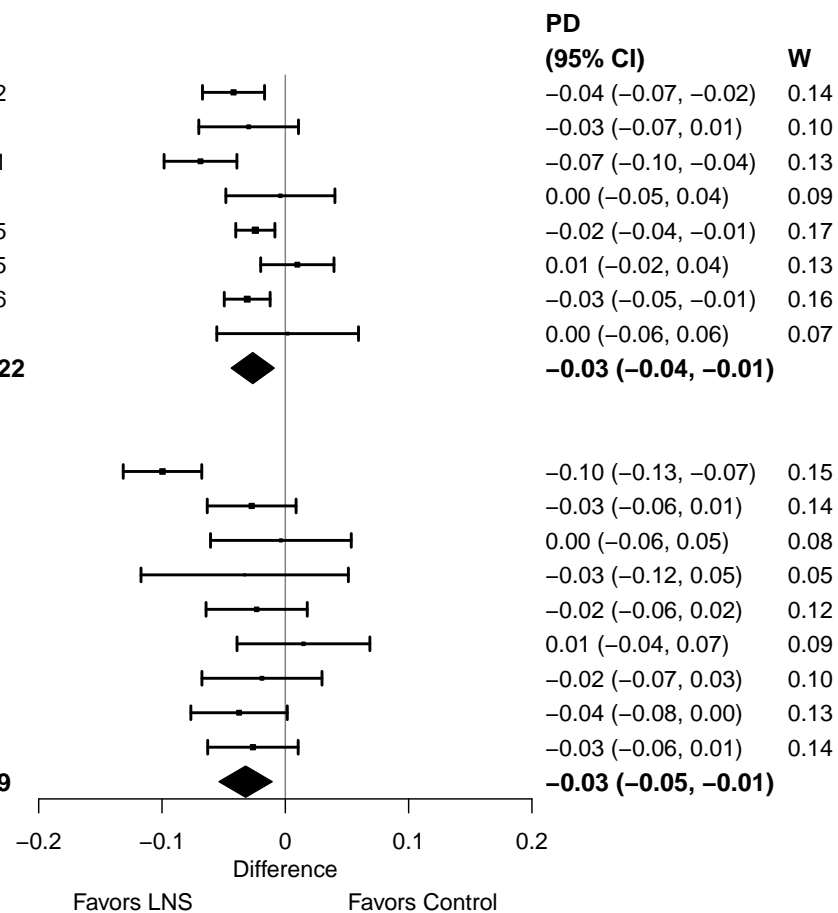

Supplemental figure 4N: Underweight prevalence difference

4N4: Stratified by Source water quality

**Source water quality**

(p-diff = 0.966)

**Source water quality – Improved**

| Country                                             | Trial            | N           | N           | PD (95% CI)                 | W    |
|-----------------------------------------------------|------------------|-------------|-------------|-----------------------------|------|
| Bangladesh                                          | JiVitA-4 (34)    | 2814        | 1232        | -0.04 (-0.07, -0.02)        | 0.22 |
| Bangladesh                                          | RDNS (35)        | 1663        | 815         | -0.03 (-0.07, 0.01)         | 0.14 |
| Bangladesh                                          | WASH-B (36)      | 572         | 1119        | -0.05 (-0.09, 0.00)         | 0.12 |
| Ghana                                               | GHANA (39)       | 98          | 96          | -0.03 (-0.12, 0.05)         | 0.05 |
| Ghana                                               | iLiNS-DYADG (40) | 347         | 693         | -0.02 (-0.06, 0.02)         | 0.14 |
| Haiti                                               | HAITI (41)       | 148         | 150         | 0.00 (-0.05, 0.04)          | 0.13 |
| Malawi                                              | iLiNS-DYADM (44) | 220         | 444         | 0.01 (-0.04, 0.07)          | 0.10 |
| Malawi                                              | iLiNS-DOSE (45)  | 702         | 241         | -0.02 (-0.07, 0.03)         | 0.11 |
| <b>I<sup>2</sup> = 0.00, Tau<sup>2</sup> = 0.00</b> |                  | <b>6564</b> | <b>4790</b> | <b>-0.03 (-0.04, -0.01)</b> |      |

**Source water quality – Unimproved**

|                                                     |                   |             |             |                            |      |
|-----------------------------------------------------|-------------------|-------------|-------------|----------------------------|------|
| Burkina Faso                                        | iLiNS-Zinc (37)   | 1960        | 666         | -0.10 (-0.13, -0.07)       | 0.13 |
| Burkina Faso                                        | PROMIS (38)       | 857         | 911         | -0.03 (-0.06, 0.01)        | 0.11 |
| Burkina Faso                                        | PROMIS CS (38)    | 430         | 436         | 0.00 (-0.06, 0.05)         | 0.06 |
| Kenya                                               | WASH-B (42)       | 697         | 2261        | -0.01 (-0.03, 0.01)        | 0.16 |
| Madagascar                                          | MAHAY (43)        | 1702        | 1685        | 0.01 (-0.02, 0.04)         | 0.14 |
| Mali                                                | PROMIS (46)       | 500         | 502         | -0.04 (-0.08, 0.00)        | 0.10 |
| Mali                                                | PROMIS CS (46)    | 946         | 960         | -0.03 (-0.06, 0.01)        | 0.11 |
| Zimbabwe                                            | SHINE (HIV-) (47) | 887         | 876         | -0.01 (-0.04, 0.01)        | 0.15 |
| Zimbabwe                                            | SHINE (HIV+) (48) | 147         | 146         | 0.01 (-0.08, 0.09)         | 0.03 |
| <b>I<sup>2</sup> = 0.73, Tau<sup>2</sup> = 0.00</b> |                   | <b>8126</b> | <b>8443</b> | <b>-0.02 (-0.05, 0.00)</b> |      |

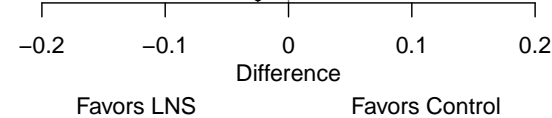



Supplemental figure 4N: Underweight prevalence difference

4N5: Stratified by Sanitation

**Sanitation**  
(p-diff = 0.573)

**Sanitation – Improved**

| Country                                             | Trial            | N           | N           | PD (95% CI)                 | W    |
|-----------------------------------------------------|------------------|-------------|-------------|-----------------------------|------|
| Bangladesh                                          | JiVitA-4 (34)    | 2814        | 1232        | -0.04 (-0.07, -0.02)        | 0.16 |
| Bangladesh                                          | RDNS (35)        | 1663        | 815         | -0.03 (-0.07, 0.01)         | 0.10 |
| Bangladesh                                          | WASH-B (36)      | 572         | 1119        | -0.05 (-0.09, 0.00)         | 0.09 |
| Burkina Faso                                        | PROMIS (38)      | 857         | 911         | -0.03 (-0.06, 0.01)         | 0.12 |
| Burkina Faso                                        | PROMIS CS (38)   | 430         | 436         | 0.00 (-0.06, 0.05)          | 0.07 |
| Ghana                                               | GHANA (39)       | 98          | 96          | -0.03 (-0.12, 0.05)         | 0.04 |
| Ghana                                               | iLiNS-DYADG (40) | 347         | 693         | -0.02 (-0.06, 0.02)         | 0.10 |
| Haiti                                               | HAITI (41)       | 148         | 150         | 0.00 (-0.05, 0.04)          | 0.09 |
| Mali                                                | PROMIS (46)      | 500         | 502         | -0.04 (-0.08, 0.00)         | 0.11 |
| Mali                                                | PROMIS CS (46)   | 946         | 960         | -0.03 (-0.06, 0.01)         | 0.12 |
| <b>I<sup>2</sup> = 0.00, Tau<sup>2</sup> = 0.00</b> |                  | <b>8375</b> | <b>6914</b> | <b>-0.03 (-0.04, -0.02)</b> |      |

**Sanitation – Unimproved**

|                                                     |                   |             |             |                            |      |
|-----------------------------------------------------|-------------------|-------------|-------------|----------------------------|------|
| Burkina Faso                                        | iLiNS-Zinc (37)   | 1960        | 666         | -0.10 (-0.13, -0.07)       | 0.17 |
| Kenya                                               | WASH-B (42)       | 697         | 2261        | -0.01 (-0.03, 0.01)        | 0.21 |
| Madagascar                                          | MAHAY (43)        | 1702        | 1685        | 0.01 (-0.02, 0.04)         | 0.18 |
| Malawi                                              | iLiNS-DYADM (44)  | 220         | 444         | 0.01 (-0.04, 0.07)         | 0.09 |
| Malawi                                              | iLiNS-DOSE (45)   | 702         | 241         | -0.02 (-0.07, 0.03)        | 0.11 |
| Zimbabwe                                            | SHINE (HIV-) (47) | 887         | 876         | -0.01 (-0.04, 0.01)        | 0.20 |
| Zimbabwe                                            | SHINE (HIV+) (48) | 147         | 146         | 0.01 (-0.08, 0.09)         | 0.04 |
| <b>I<sup>2</sup> = 0.80, Tau<sup>2</sup> = 0.00</b> |                   | <b>6315</b> | <b>6319</b> | <b>-0.02 (-0.05, 0.01)</b> |      |

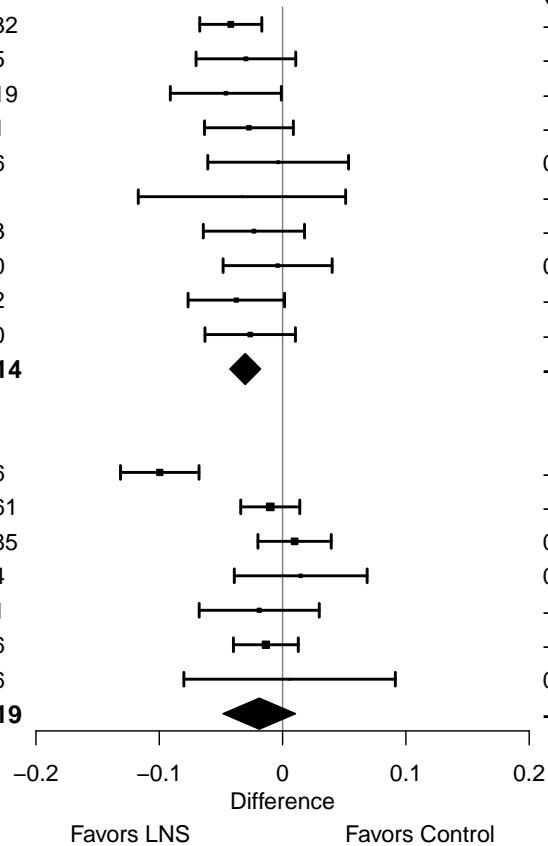

Supplemental figure 4N: Underweight prevalence difference

4N6: Stratified by Supplement duration

**Supplement duration**

(p-diff = 0.415)

**Supplement duration – 12m or less**

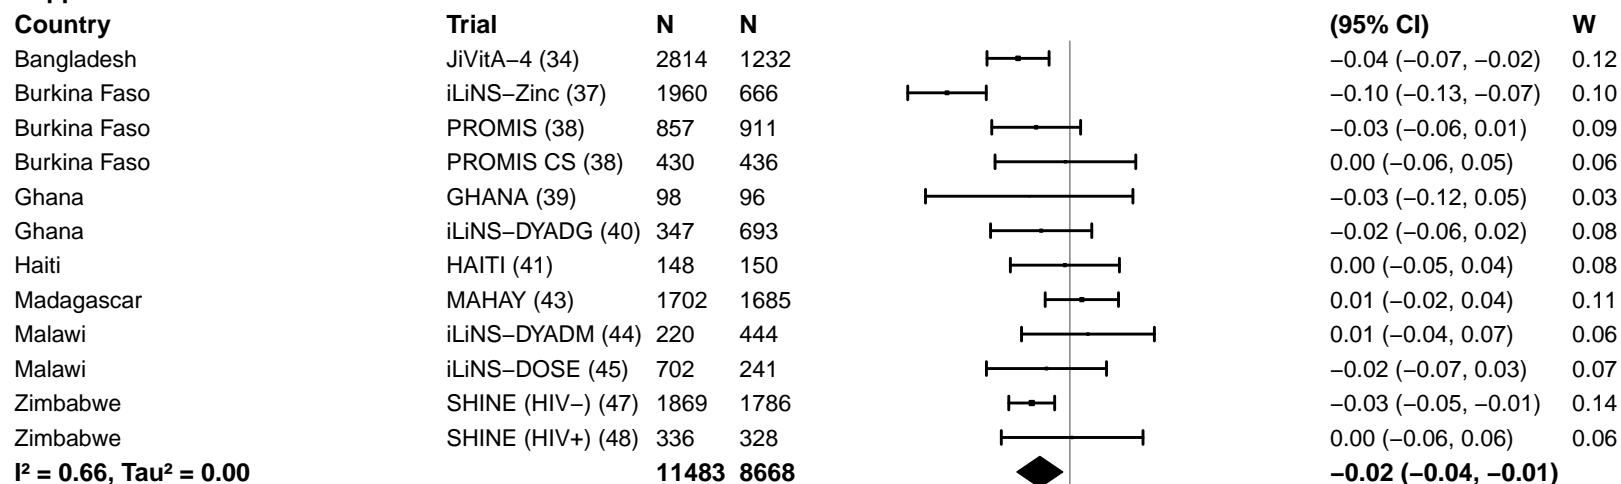

**Supplement duration – > 12m**

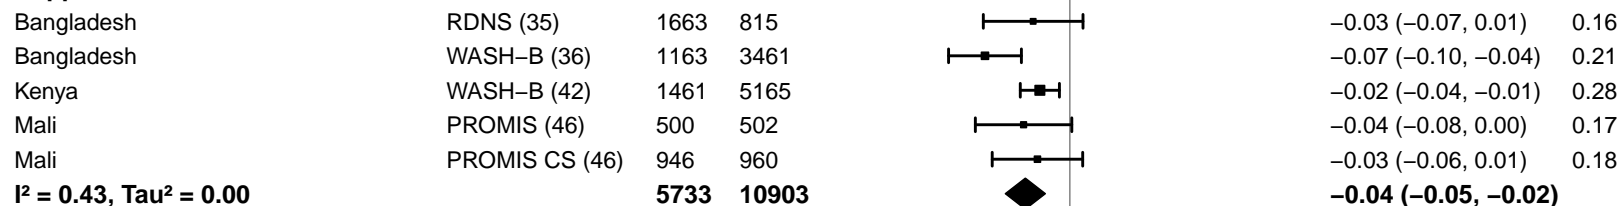

Supplemental figure 4N: Underweight prevalence difference

4N7: Stratified by Frequency of contact

**Frequency of contact**

(p-diff = 0.032)

**Frequency of contact – Monthly**

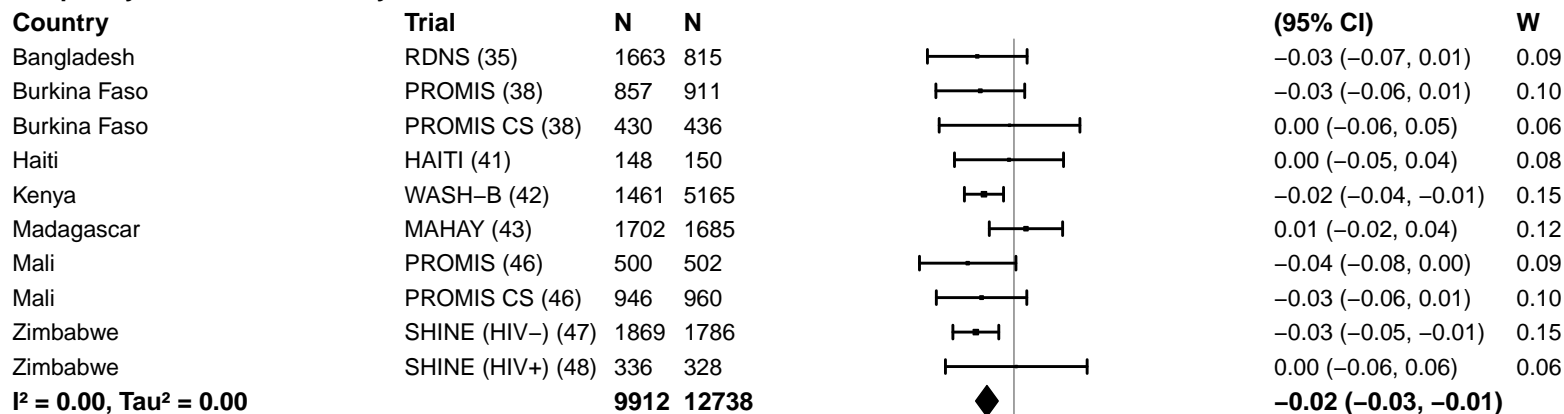

**Frequency of contact – Weekly**

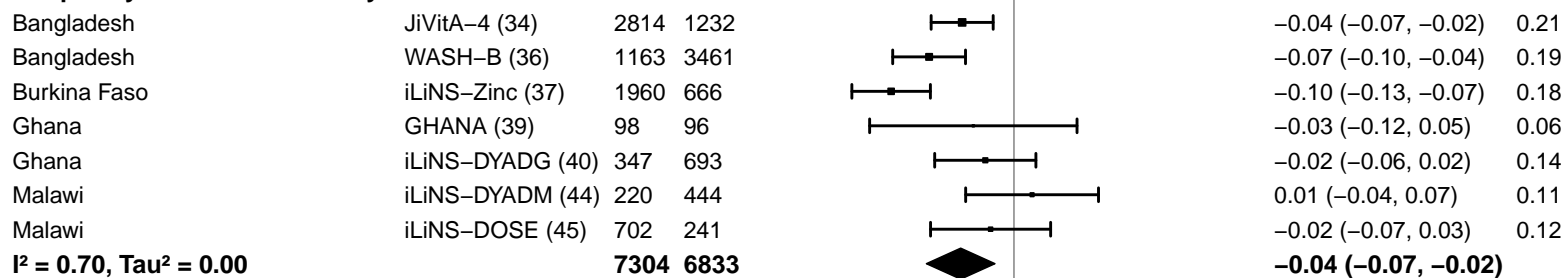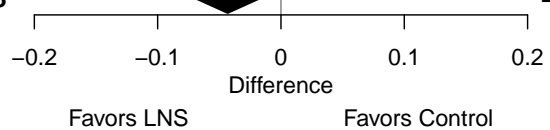

Supplemental figure 4N: Underweight prevalence difference

4N8: Stratified by Average SQ-LNS compliance

**Average SQ-LNS compliance**

(p-diff = 0.062)

**Average SQ-LNS compliance – Low**

| Country                                             | Trial             | N           | N           | PD (95% CI)                 | W    |
|-----------------------------------------------------|-------------------|-------------|-------------|-----------------------------|------|
| Burkina Faso                                        | PROMIS (38)       | 857         | 911         | -0.03 (-0.06, 0.01)         | 0.13 |
| Burkina Faso                                        | PROMIS CS (38)    | 430         | 436         | 0.00 (-0.06, 0.05)          | 0.07 |
| Ghana                                               | iLiNS-DYADG (40)  | 347         | 693         | -0.02 (-0.06, 0.02)         | 0.11 |
| Malawi                                              | iLiNS-DYADM (44)  | 220         | 444         | 0.01 (-0.04, 0.07)          | 0.08 |
| Malawi                                              | iLiNS-DOSE (45)   | 702         | 241         | -0.02 (-0.07, 0.03)         | 0.09 |
| Mali                                                | PROMIS (46)       | 500         | 502         | -0.04 (-0.08, 0.00)         | 0.12 |
| Mali                                                | PROMIS CS (46)    | 946         | 960         | -0.03 (-0.06, 0.01)         | 0.13 |
| Zimbabwe                                            | SHINE (HIV-) (47) | 1869        | 1786        | -0.03 (-0.05, -0.01)        | 0.20 |
| Zimbabwe                                            | SHINE (HIV+) (48) | 336         | 328         | 0.00 (-0.06, 0.06)          | 0.07 |
| <b>I<sup>2</sup> = 0.00, Tau<sup>2</sup> = 0.00</b> |                   | <b>6207</b> | <b>6301</b> | <b>-0.02 (-0.04, -0.01)</b> |      |

**Average SQ-LNS compliance – High**

|                                                     |                 |             |              |                             |      |
|-----------------------------------------------------|-----------------|-------------|--------------|-----------------------------|------|
| Bangladesh                                          | JiVitA-4 (34)   | 2814        | 1232         | -0.04 (-0.07, -0.02)        | 0.18 |
| Bangladesh                                          | RDNS (35)       | 1663        | 815          | -0.03 (-0.07, 0.01)         | 0.12 |
| Bangladesh                                          | WASH-B (36)     | 1163        | 3461         | -0.07 (-0.10, -0.04)        | 0.16 |
| Burkina Faso                                        | iLiNS-Zinc (37) | 1960        | 666          | -0.10 (-0.13, -0.07)        | 0.15 |
| Ghana                                               | GHANA (39)      | 98          | 96           | -0.03 (-0.12, 0.05)         | 0.04 |
| Haiti                                               | HAITI (41)      | 148         | 150          | 0.00 (-0.05, 0.04)          | 0.11 |
| Kenya                                               | WASH-B (42)     | 1461        | 5165         | -0.02 (-0.04, -0.01)        | 0.23 |
| <b>I<sup>2</sup> = 0.75, Tau<sup>2</sup> = 0.00</b> |                 | <b>9307</b> | <b>11585</b> | <b>-0.04 (-0.07, -0.02)</b> |      |

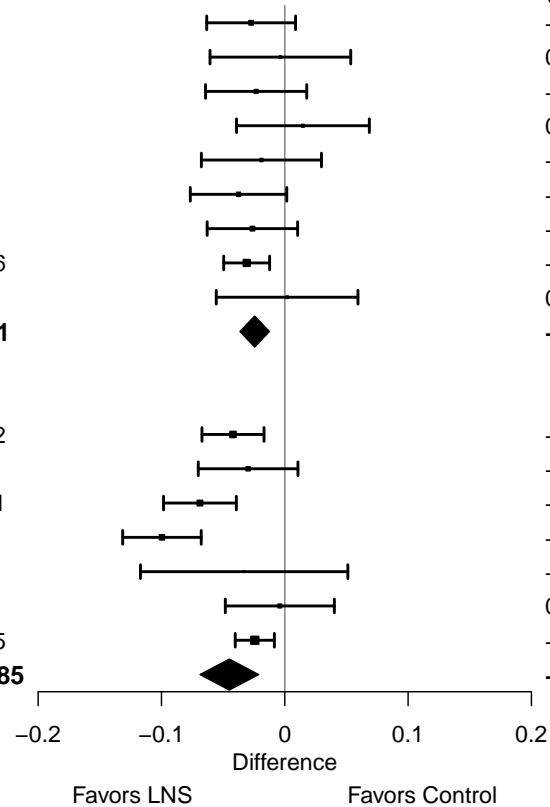

## Supplemental figure 4O: Mean difference in HCZ

### 4O1: Stratified by Geographic region

#### Geographic region

(p-diff = 0.840)

#### Geographic region – SEAR

| Country    | Trial         | N           | N           |
|------------|---------------|-------------|-------------|
| Bangladesh | JiVitA-4 (34) | 2885        | 1267        |
| Bangladesh | RDNS (35)     | 1663        | 815         |
| Bangladesh | WASH-B (36)   | 1163        | 3463        |
|            |               | <b>5711</b> | <b>5545</b> |

$I^2 = 0.28, \text{Tau}^2 = 0.00$

#### Geographic region – AFR

|              |                   |             |             |
|--------------|-------------------|-------------|-------------|
| Burkina Faso | iLiNS-Zinc (37)   | 1946        | 664         |
| Burkina Faso | PROMIS (38)       |             |             |
| Burkina Faso | PROMIS CS (38)    |             |             |
| Ghana        | GHANA (39)        | 98          | 96          |
| Ghana        | iLiNS-DYADG (40)  | 347         | 692         |
| Kenya        | WASH-B (42)       | 1461        | 5176        |
| Madagascar   | MAHAY (43)        |             |             |
| Malawi       | iLiNS-DYADM (44)  | 220         | 444         |
| Malawi       | iLiNS-DOSE (45)   | 692         | 238         |
| Mali         | PROMIS (46)       |             |             |
| Mali         | PROMIS CS (46)    |             |             |
| Zimbabwe     | SHINE (HIV-) (47) | 1871        | 1783        |
| Zimbabwe     | SHINE (HIV+) (48) | 337         | 329         |
|              |                   | <b>6972</b> | <b>9422</b> |

$I^2 = 0.56, \text{Tau}^2 = 0.00$

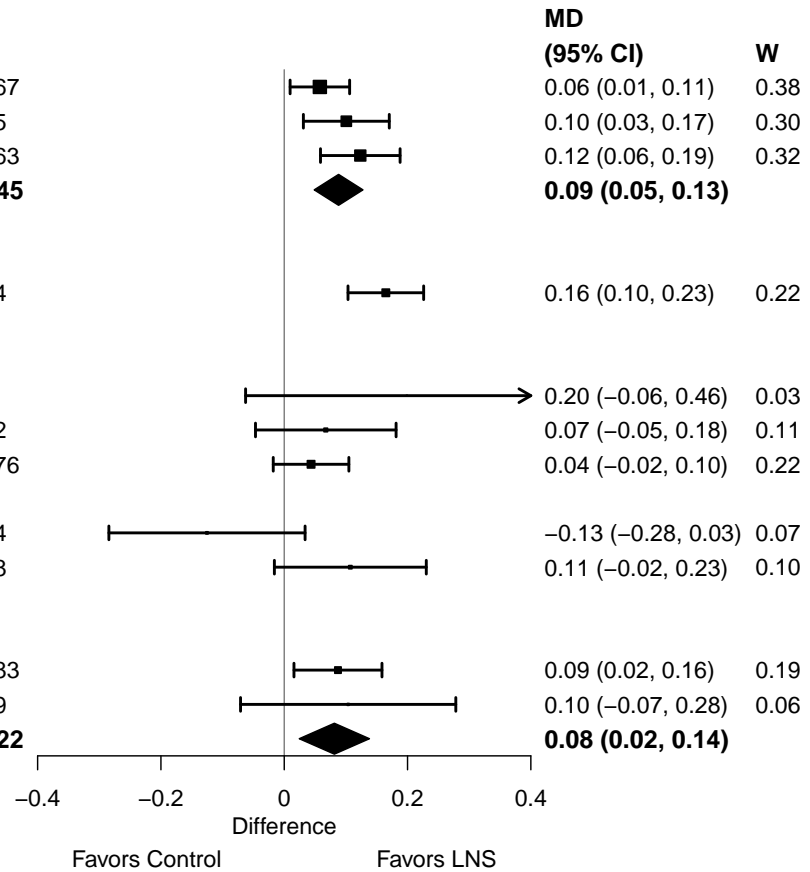

Supplemental figure 4O: Mean difference in HCZ

4O2: Stratified by Stunting burden

**Stunting burden**

(p-diff = 0.053)

**Stunting burden – Less than 35%**

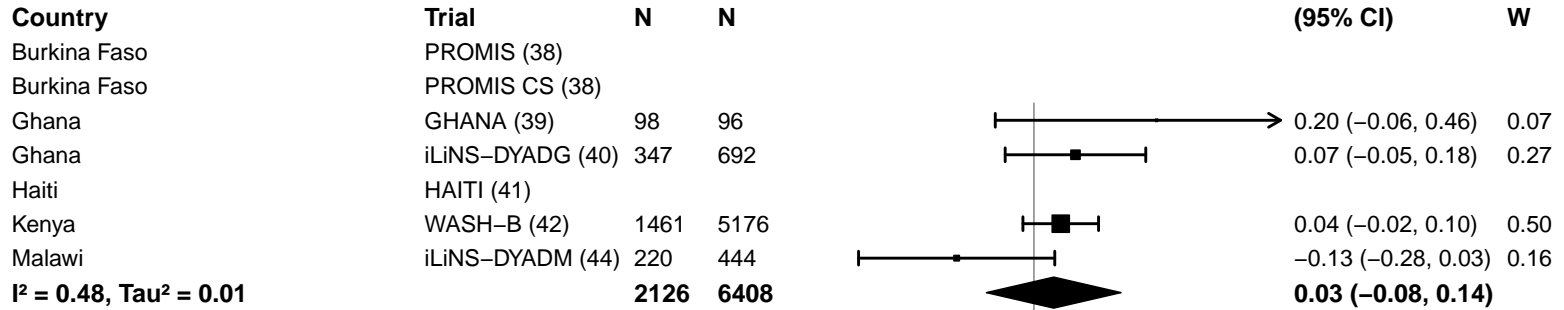

**Stunting burden – More than 35%**

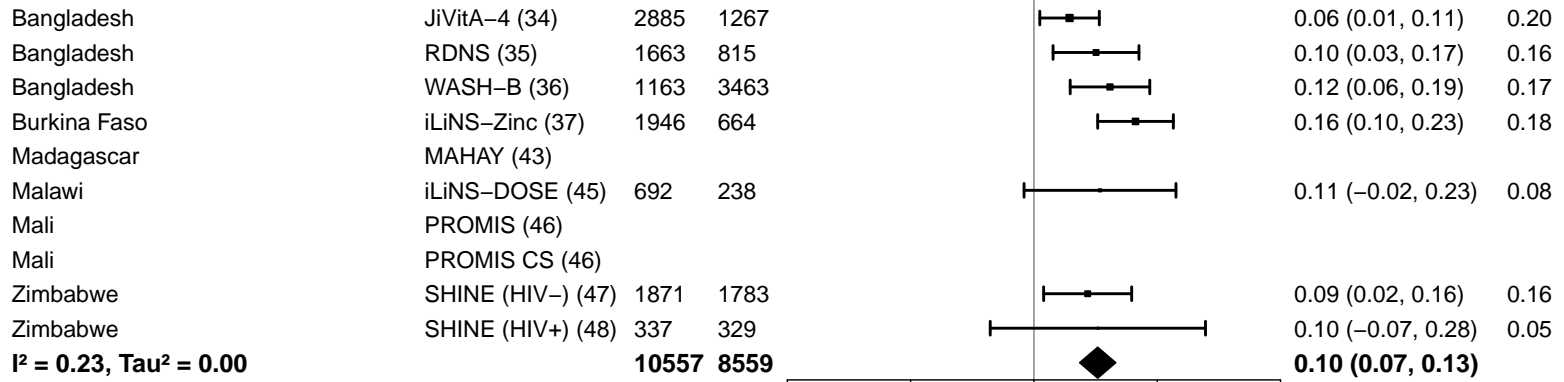

-0.4 -0.2 0 0.2 0.4  
Difference  
Favors Control Favors LNS

Supplemental figure 4O: Mean difference in HCZ

4O3: Stratified by Malaria prevalence

**Malaria prevalence**

( $p$ -diff = 0.621)

**Malaria prevalence – Less than 10%**

| Country    | Trial             | N           | N            |
|------------|-------------------|-------------|--------------|
| Bangladesh | JiVitA-4 (34)     | 2885        | 1267         |
| Bangladesh | RDNS (35)         | 1663        | 815          |
| Bangladesh | WASH-B (36)       | 1163        | 3463         |
| Haiti      | HAITI (41)        |             |              |
| Kenya      | WASH-B (42)       | 1461        | 5176         |
| Madagascar | MAHAY (43)        |             |              |
| Zimbabwe   | SHINE (HIV-) (47) | 1871        | 1783         |
| Zimbabwe   | SHINE (HIV+) (48) | 337         | 329          |
|            |                   | <b>9380</b> | <b>12833</b> |

$I^2 = 0.00$ ,  $\text{Tau}^2 = 0.00$

**Malaria prevalence – At least 10%**

|              |                  |             |             |
|--------------|------------------|-------------|-------------|
| Burkina Faso | iLiNS-Zinc (37)  | 1946        | 664         |
| Burkina Faso | PROMIS (38)      |             |             |
| Burkina Faso | PROMIS CS (38)   |             |             |
| Ghana        | GHANA (39)       | 98          | 96          |
| Ghana        | iLiNS-DYADG (40) | 347         | 692         |
| Malawi       | iLiNS-DYADM (44) | 220         | 444         |
| Malawi       | iLiNS-DOSE (45)  | 692         | 238         |
| Mali         | PROMIS (46)      |             |             |
| Mali         | PROMIS CS (46)   |             |             |
|              |                  | <b>3303</b> | <b>2134</b> |

$I^2 = 0.68$ ,  $\text{Tau}^2 = 0.01$

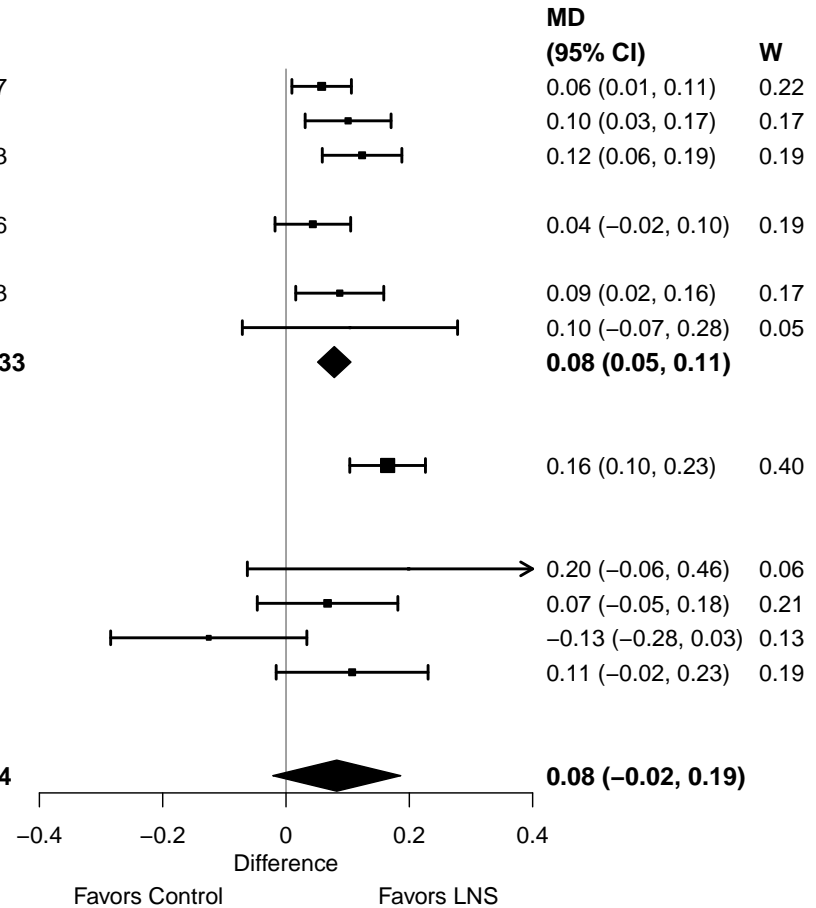

Supplemental figure 4O: Mean difference in HCZ

4O4: Stratified by Source water quality

**Source water quality**  
(p-diff = 0.875)

**Source water quality – Improved**

| Country                                             | Trial            | N                | N    | MD (95% CI)              | W    |
|-----------------------------------------------------|------------------|------------------|------|--------------------------|------|
| Bangladesh                                          | JiVitA-4 (34)    | 2885             | 1267 | 0.06 (0.01, 0.11)        | 0.26 |
| Bangladesh                                          | RDNS (35)        | 1663             | 815  | 0.10 (0.03, 0.17)        | 0.21 |
| Bangladesh                                          | WASH-B (36)      | 571              | 1121 | 0.16 (0.05, 0.27)        | 0.14 |
| Ghana                                               | GHANA (39)       | 98               | 96   | 0.20 (-0.06, 0.46)       | 0.04 |
| Ghana                                               | iLiNS-DYADG (40) | 347              | 692  | 0.07 (-0.05, 0.18)       | 0.13 |
| Haiti                                               | HAITI (41)       |                  |      |                          |      |
| Malawi                                              | iLiNS-DYADM (44) | 220              | 444  | -0.13 (-0.28, 0.03)      | 0.09 |
| Malawi                                              | iLiNS-DOSE (45)  | 692              | 238  | 0.11 (-0.02, 0.23)       | 0.12 |
| <b>I<sup>2</sup> = 0.43, Tau<sup>2</sup> = 0.00</b> |                  | <b>6476 4673</b> |      | <b>0.08 (0.02, 0.14)</b> |      |

**Source water quality – Unimproved**

|                                                     |                   |                  |      |                          |      |
|-----------------------------------------------------|-------------------|------------------|------|--------------------------|------|
| Burkina Faso                                        | iLiNS-Zinc (37)   | 1946             | 664  | 0.16 (0.10, 0.23)        | 0.39 |
| Burkina Faso                                        | PROMIS (38)       |                  |      |                          |      |
| Burkina Faso                                        | PROMIS CS (38)    |                  |      |                          |      |
| Kenya                                               | WASH-B (42)       | 696              | 2266 | 0.04 (-0.05, 0.13)       | 0.29 |
| Madagascar                                          | MAHAY (43)        |                  |      |                          |      |
| Mali                                                | PROMIS (46)       |                  |      |                          |      |
| Mali                                                | PROMIS CS (46)    |                  |      |                          |      |
| Zimbabwe                                            | SHINE (HIV-) (47) | 887              | 873  | 0.04 (-0.07, 0.14)       | 0.24 |
| Zimbabwe                                            | SHINE (HIV+) (48) | 147              | 146  | 0.04 (-0.21, 0.28)       | 0.07 |
| <b>I<sup>2</sup> = 0.62, Tau<sup>2</sup> = 0.00</b> |                   | <b>3676 3949</b> |      | <b>0.09 (0.01, 0.16)</b> |      |

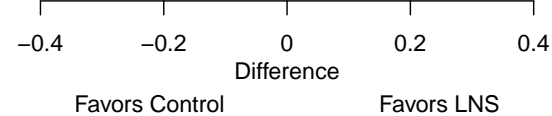



Supplemental figure 4O: Mean difference in HCZ

4O5: Stratified by Sanitation

**Sanitation**  
(p-diff = 0.484)

**Sanitation – Improved**

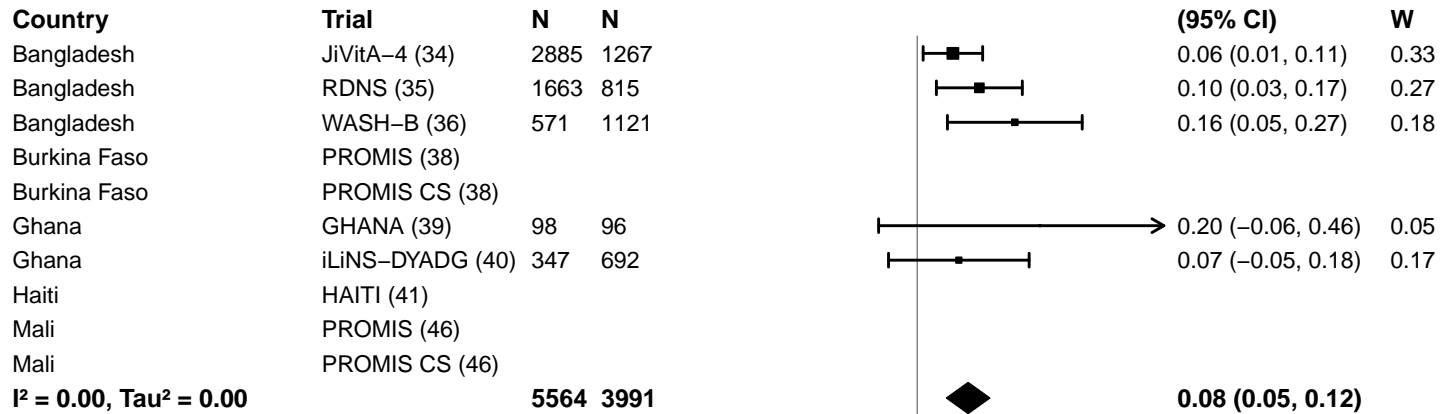

**Sanitation – Unimproved**

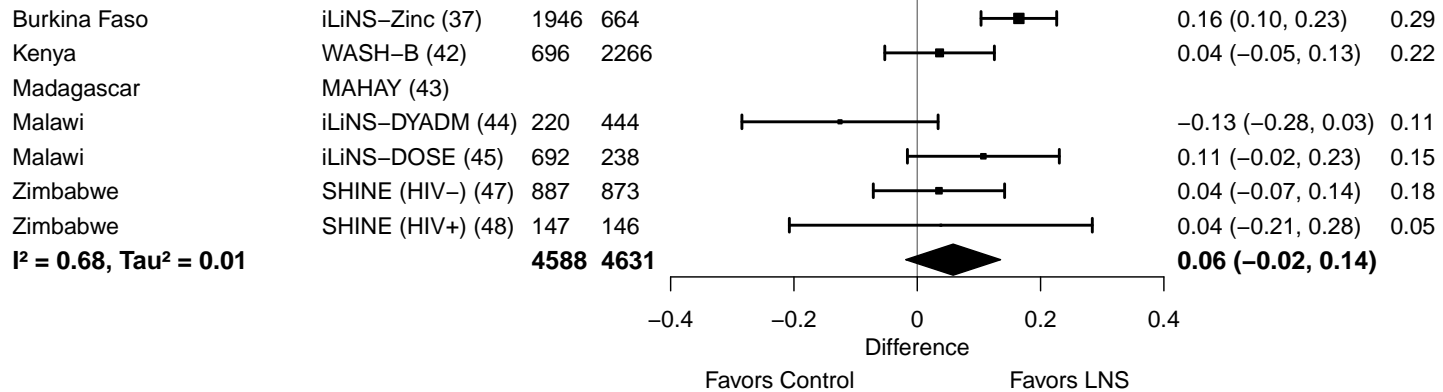

Supplemental figure 4O: Mean difference in HCZ

4O6: Stratified by Supplement duration

**Supplement duration**

(p-diff = 0.949)

**Supplement duration – 12m or less**

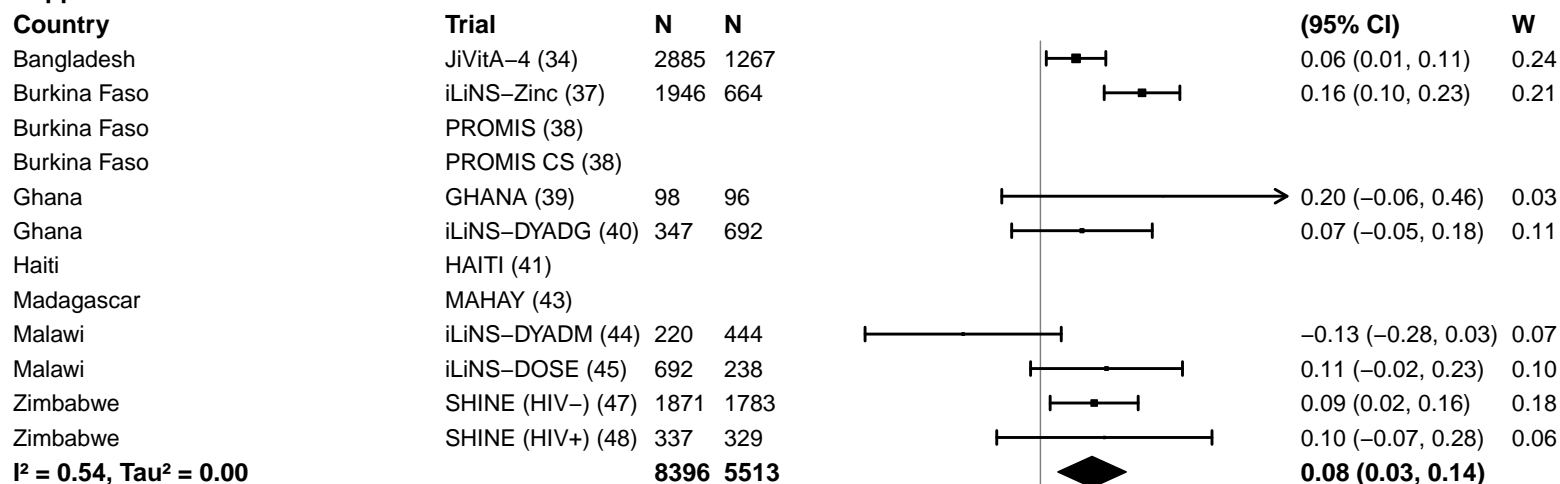

**Supplement duration – > 12m**

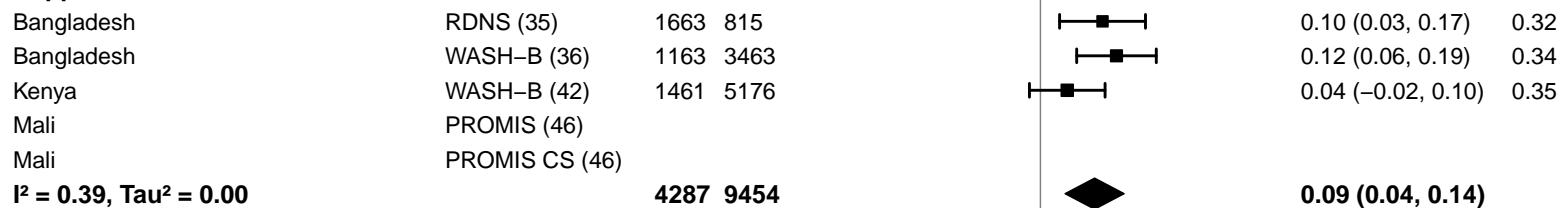

Supplemental figure 4O: Mean difference in HCZ

4O7: Stratified by Frequency of contact

Frequency of contact  
( $p$ -diff = 0.687)

Frequency of contact – Monthly

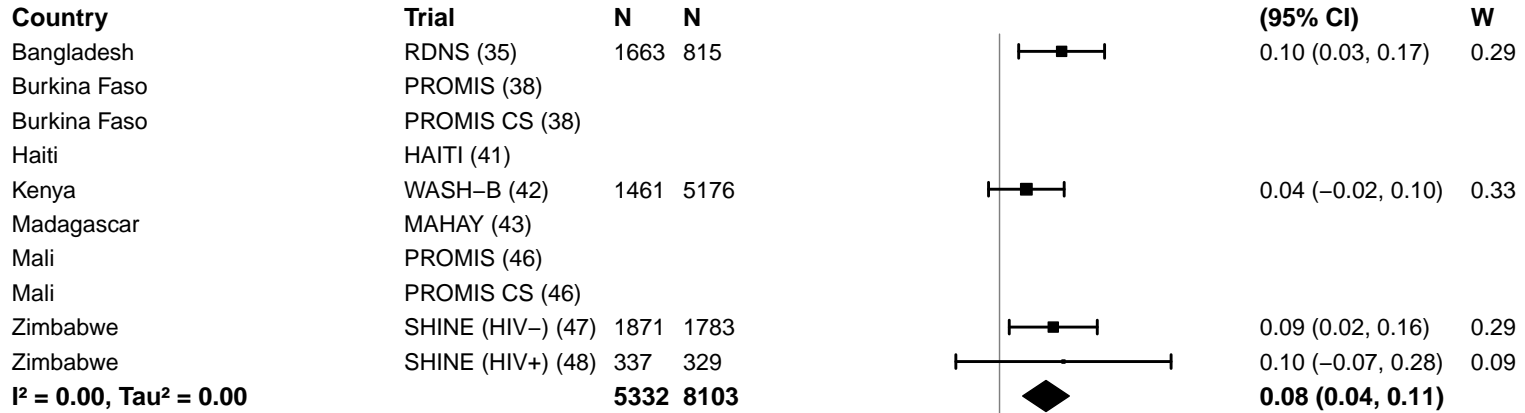

Frequency of contact – Weekly

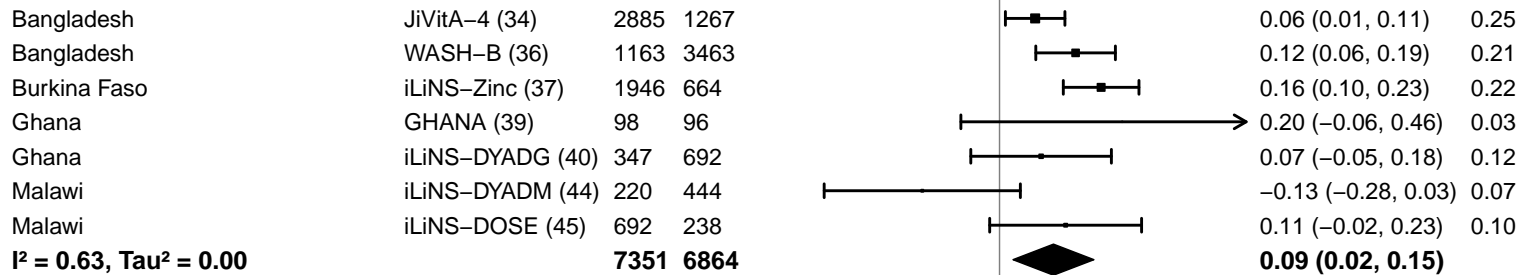

-0.4 -0.2 0 0.2 0.4  
Difference  
Favors Control Favors LNS

Supplemental figure 4O: Mean difference in HCZ

4O8: Stratified by Average SQ-LNS compliance

**Average SQ-LNS compliance**

(p-diff = 0.336)

**Average SQ-LNS compliance – Low**

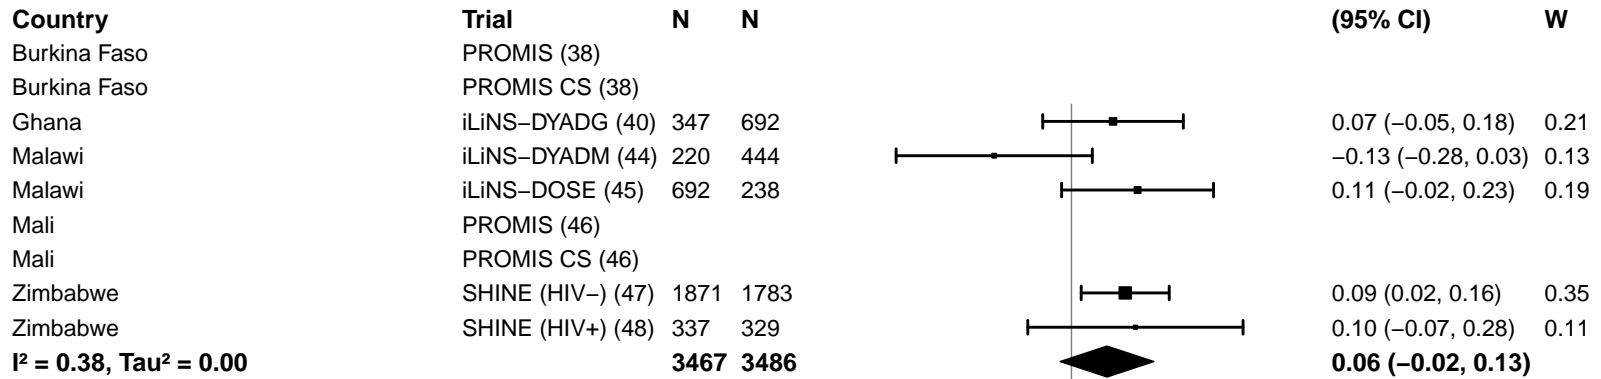

**Average SQ-LNS compliance – High**

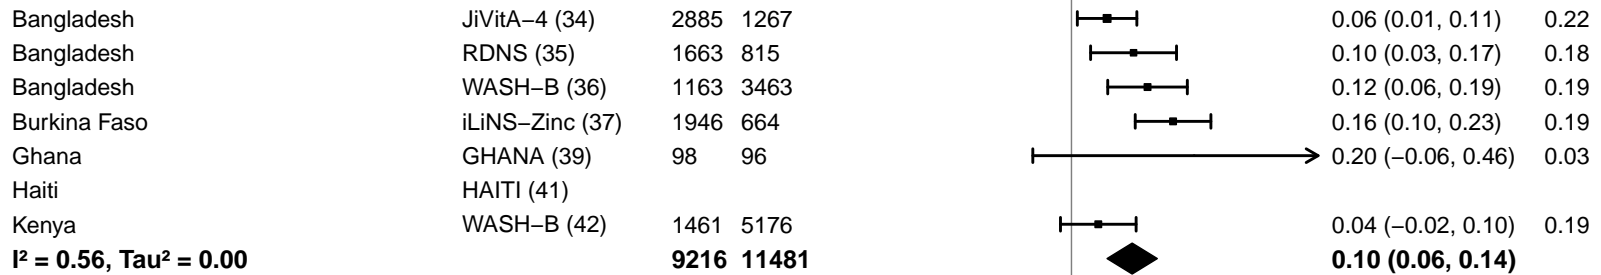

## Supplemental figure 4P: Small head size prevalence ratio

### 4P1: Stratified by Geographic region

#### Geographic region

(p-diff = 0.271)

#### Geographic region – SEAR

| Country                                             | Trial         | N           | N           | PR<br>(95% CI)           | W    |
|-----------------------------------------------------|---------------|-------------|-------------|--------------------------|------|
| Bangladesh                                          | JiVitA-4 (34) | 2885        | 1267        | 1.03 (0.90, 1.18)        | 0.19 |
| Bangladesh                                          | RDNS (35)     | 1663        | 815         | 0.90 (0.82, 0.98)        | 0.47 |
| Bangladesh                                          | WASH-B (36)   | 1163        | 3463        | 0.90 (0.82, 1.00)        | 0.34 |
| <b>I<sup>2</sup> = 0.36, Tau<sup>2</sup> = 0.00</b> |               | <b>5711</b> | <b>5545</b> | <b>0.93 (0.86, 1.01)</b> |      |

#### Geographic region – AFR

|                                                     |                   |             |             |                          |      |
|-----------------------------------------------------|-------------------|-------------|-------------|--------------------------|------|
| Burkina Faso                                        | iLiNS-Zinc (37)   | 1946        | 664         | 0.89 (0.78, 1.01)        | 0.49 |
| Burkina Faso                                        | PROMIS (38)       |             |             |                          |      |
| Burkina Faso                                        | PROMIS CS (38)    |             |             |                          |      |
| Ghana                                               | GHANA (39)        | 98          | 96          | 0.33 (0.07, 1.58)        | 0.00 |
| Ghana                                               | iLiNS-DYADG (40)  | 347         | 692         | 0.88 (0.65, 1.20)        | 0.09 |
| Kenya                                               | WASH-B (42)       | 1461        | 5176        | 0.92 (0.67, 1.25)        | 0.09 |
| Madagascar                                          | MAHAY (43)        |             |             |                          |      |
| Malawi                                              | iLiNS-DYADM (44)  | 220         | 444         | 0.88 (0.54, 1.44)        | 0.04 |
| Malawi                                              | iLiNS-DOSE (45)   | 692         | 238         | 0.79 (0.60, 1.03)        | 0.12 |
| Mali                                                | PROMIS (46)       |             |             |                          |      |
| Mali                                                | PROMIS CS (46)    |             |             |                          |      |
| Zimbabwe                                            | SHINE (HIV-) (47) | 1871        | 1783        | 0.81 (0.63, 1.05)        | 0.13 |
| Zimbabwe                                            | SHINE (HIV+) (48) | 337         | 329         | 0.98 (0.61, 1.57)        | 0.04 |
| <b>I<sup>2</sup> = 0.00, Tau<sup>2</sup> = 0.00</b> |                   | <b>6972</b> | <b>9422</b> | <b>0.87 (0.79, 0.95)</b> |      |

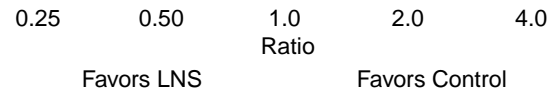

Supplemental figure 4P: Small head size prevalence ratio

4P2: Stratified by Stunting burden

**Stunting burden**

(p-diff = 0.780)

**Stunting burden – Less than 35%**

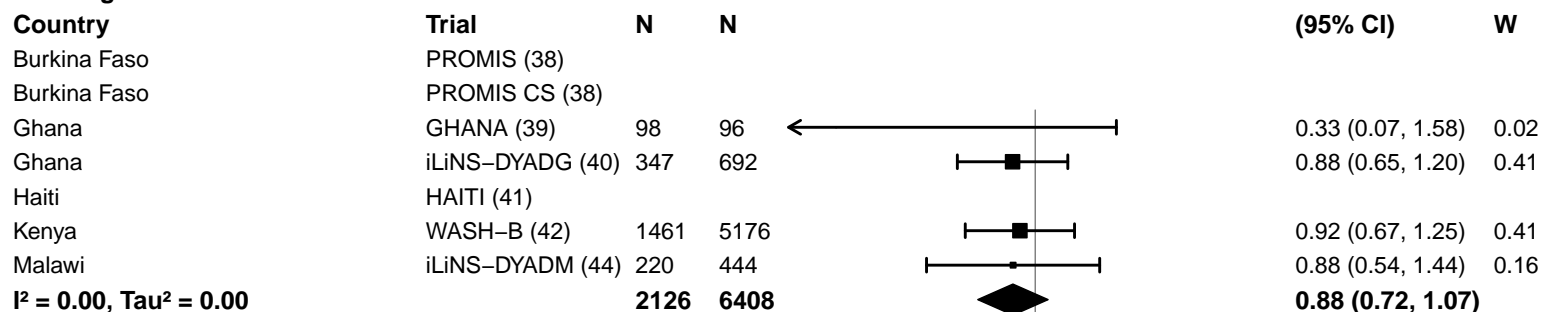

**Stunting burden – More than 35%**

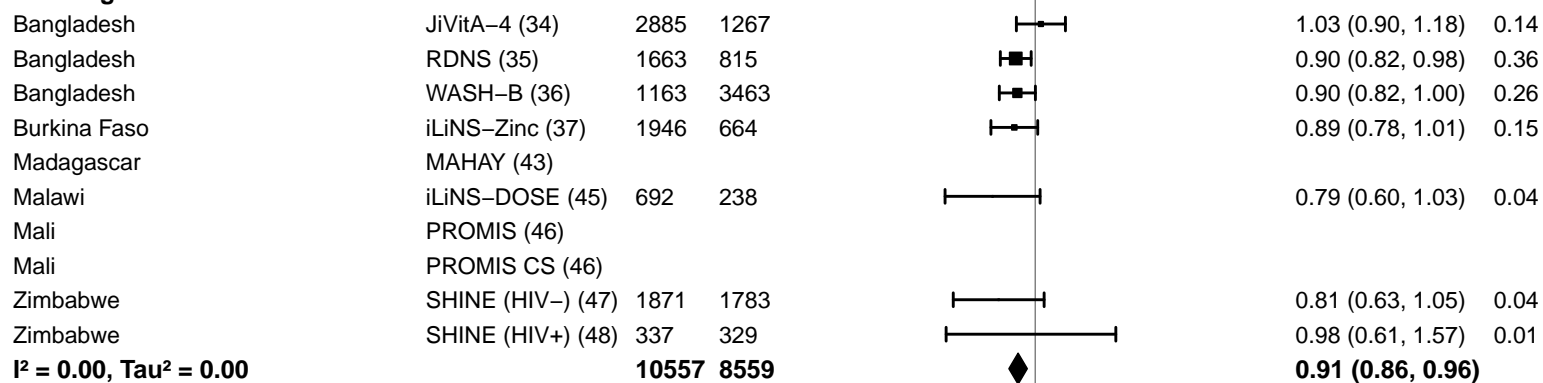

Supplemental figure 4P: Small head size prevalence ratio

4P3: Stratified by Malaria prevalence

**Malaria prevalence**

(p-diff = 0.351)

**Malaria prevalence – Less than 10%**

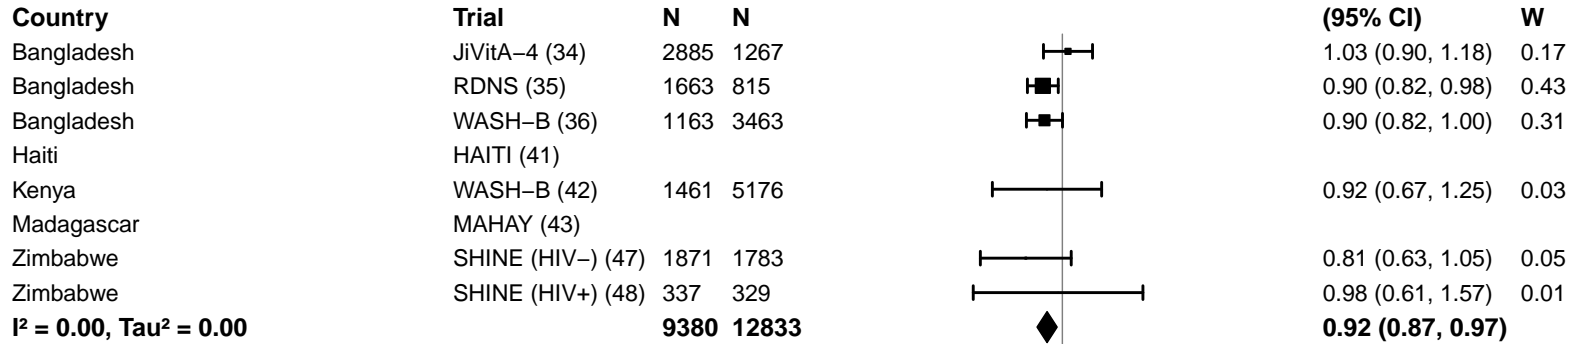

**Malaria prevalence – At least 10%**

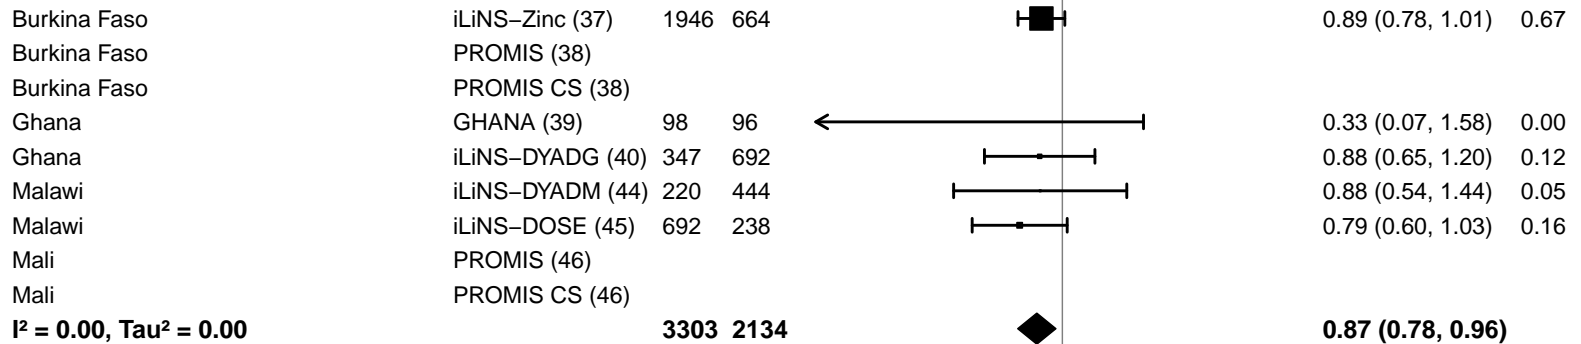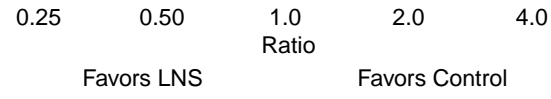

Supplemental figure 4P: Small head size prevalence ratio

4P4: Stratified by Source water quality

**Source water quality**  
(p-diff = 0.958)

**Source water quality – Improved**

| Country                                             | Trial            | N           | N           | PR<br>(95% CI)           | W    |
|-----------------------------------------------------|------------------|-------------|-------------|--------------------------|------|
| Bangladesh                                          | JiVitA-4 (34)    | 2885        | 1267        | 1.03 (0.90, 1.18)        | 0.21 |
| Bangladesh                                          | RDNS (35)        | 1663        | 815         | 0.90 (0.82, 0.98)        | 0.54 |
| Bangladesh                                          | WASH-B (36)      | 571         | 1121        | 0.86 (0.73, 1.03)        | 0.13 |
| Ghana                                               | GHANA (39)       | 98          | 96          | 0.33 (0.07, 1.58)        | 0.00 |
| Ghana                                               | iLiNS-DYADG (40) | 347         | 692         | 0.88 (0.65, 1.20)        | 0.04 |
| Haiti                                               | HAITI (41)       |             |             |                          |      |
| Malawi                                              | iLiNS-DYADM (44) | 220         | 444         | 0.88 (0.54, 1.44)        | 0.02 |
| Malawi                                              | iLiNS-DOSE (45)  | 692         | 238         | 0.79 (0.60, 1.03)        | 0.06 |
| <b>I<sup>2</sup> = 0.08, Tau<sup>2</sup> = 0.00</b> |                  | <b>6476</b> | <b>4673</b> | <b>0.91 (0.85, 0.98)</b> |      |

**Source water quality – Unimproved**

|                                                     |                   |             |             |                          |      |
|-----------------------------------------------------|-------------------|-------------|-------------|--------------------------|------|
| Burkina Faso                                        | iLiNS-Zinc (37)   | 1946        | 664         | 0.89 (0.78, 1.01)        | 0.79 |
| Burkina Faso                                        | PROMIS (38)       |             |             |                          |      |
| Burkina Faso                                        | PROMIS CS (38)    |             |             |                          |      |
| Kenya                                               | WASH-B (42)       | 696         | 2266        | 0.73 (0.45, 1.17)        | 0.06 |
| Madagascar                                          | MAHAY (43)        |             |             |                          |      |
| Mali                                                | PROMIS (46)       |             |             |                          |      |
| Mali                                                | PROMIS CS (46)    |             |             |                          |      |
| Zimbabwe                                            | SHINE (HIV-) (47) | 887         | 873         | 1.01 (0.73, 1.39)        | 0.13 |
| Zimbabwe                                            | SHINE (HIV+) (48) | 147         | 146         | 1.44 (0.68, 3.06)        | 0.02 |
| <b>I<sup>2</sup> = 0.00, Tau<sup>2</sup> = 0.00</b> |                   | <b>3676</b> | <b>3949</b> | <b>0.90 (0.80, 1.01)</b> |      |

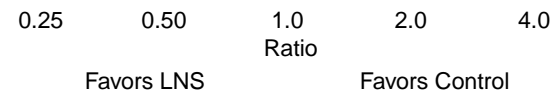



Supplemental figure 4P: Small head size prevalence ratio

4P5: Stratified by Sanitation

**Sanitation**  
(p-diff = 0.549)

**Sanitation – Improved**

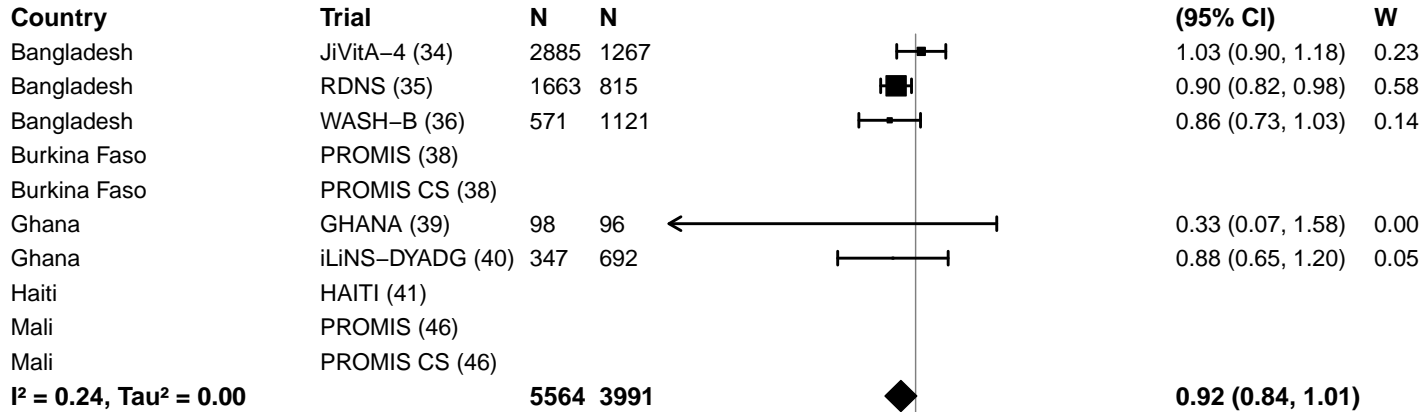

**Sanitation – Unimproved**

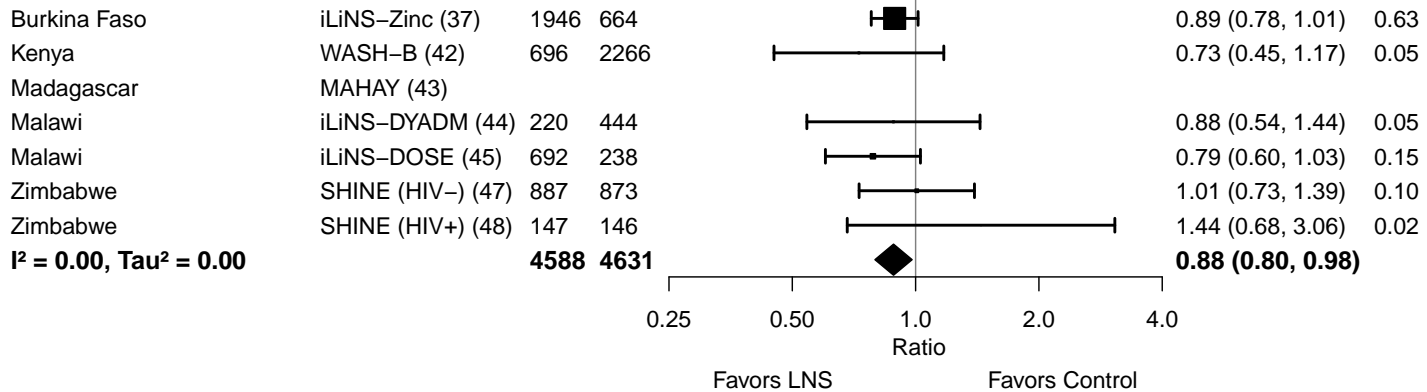

Supplemental figure 4P: Small head size prevalence ratio

4P6: Stratified by Supplement duration

**Supplement duration**

(p-diff = 0.749)

**Supplement duration – 12m or less**

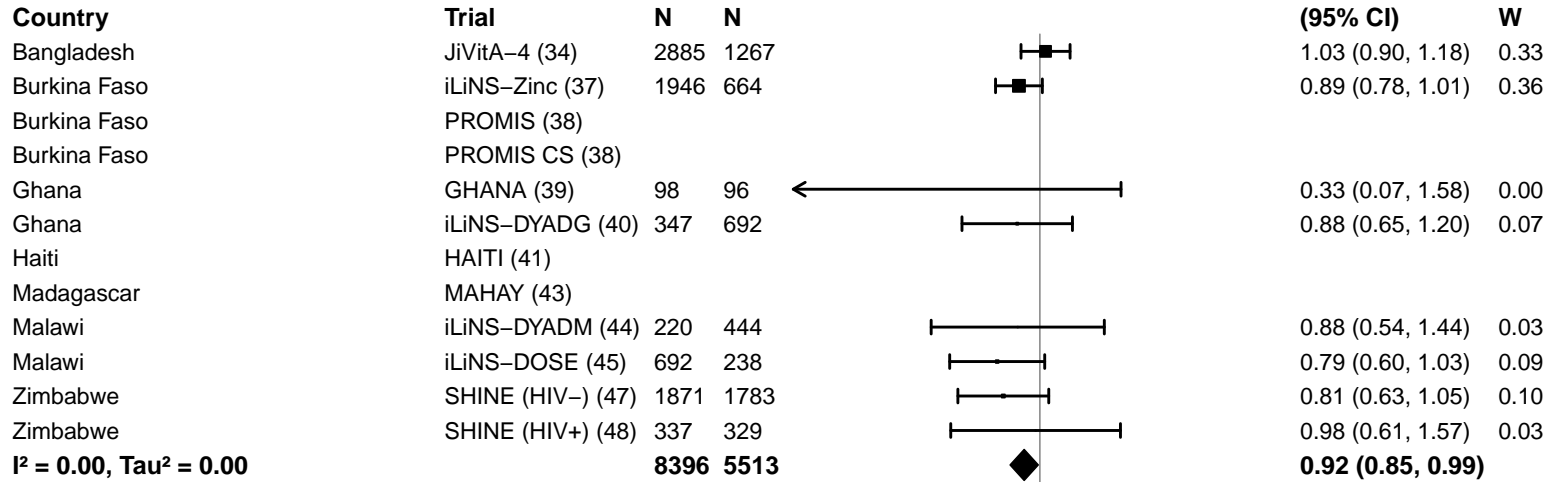

**Supplement duration – > 12m**

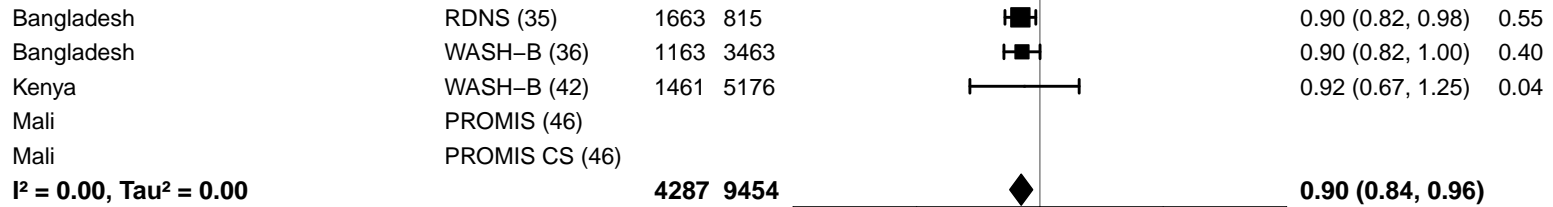

Supplemental figure 4P: Small head size prevalence ratio

4P7: Stratified by Frequency of contact

**Frequency of contact**  
(p-diff = 0.591)

**Frequency of contact – Monthly**

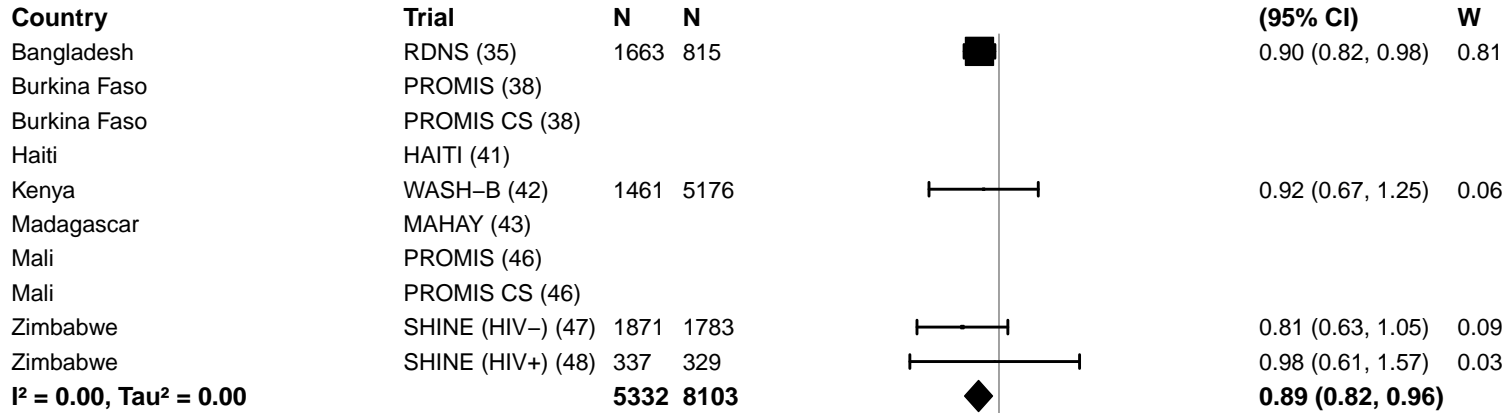

**Frequency of contact – Weekly**

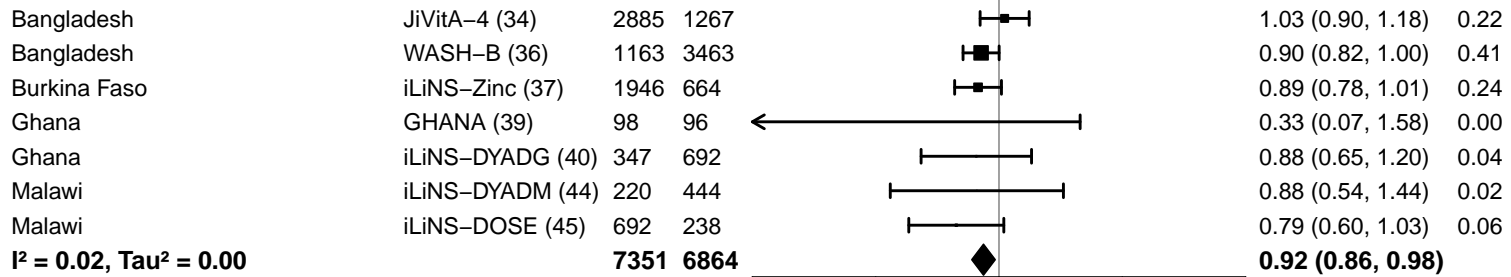

0.25 0.50 1.0 2.0 4.0  
Ratio  
Favors LNS Favors Control

Supplemental figure 4P: Small head size prevalence ratio

4P8: Stratified by Average SQ-LNS compliance

**Average SQ-LNS compliance**  
(p-diff = 0.264)

**Average SQ-LNS compliance – Low**

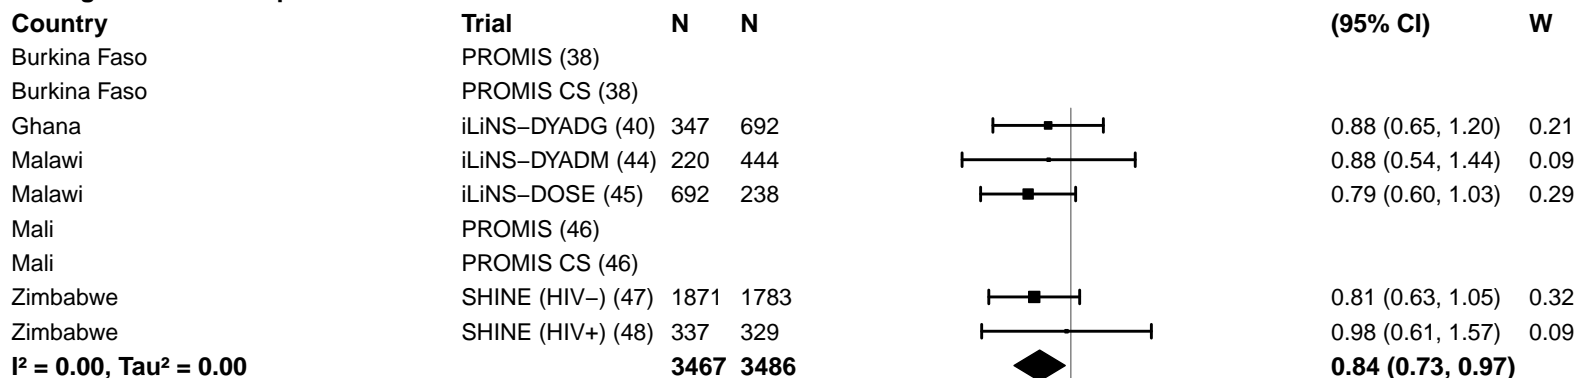

**Average SQ-LNS compliance – High**

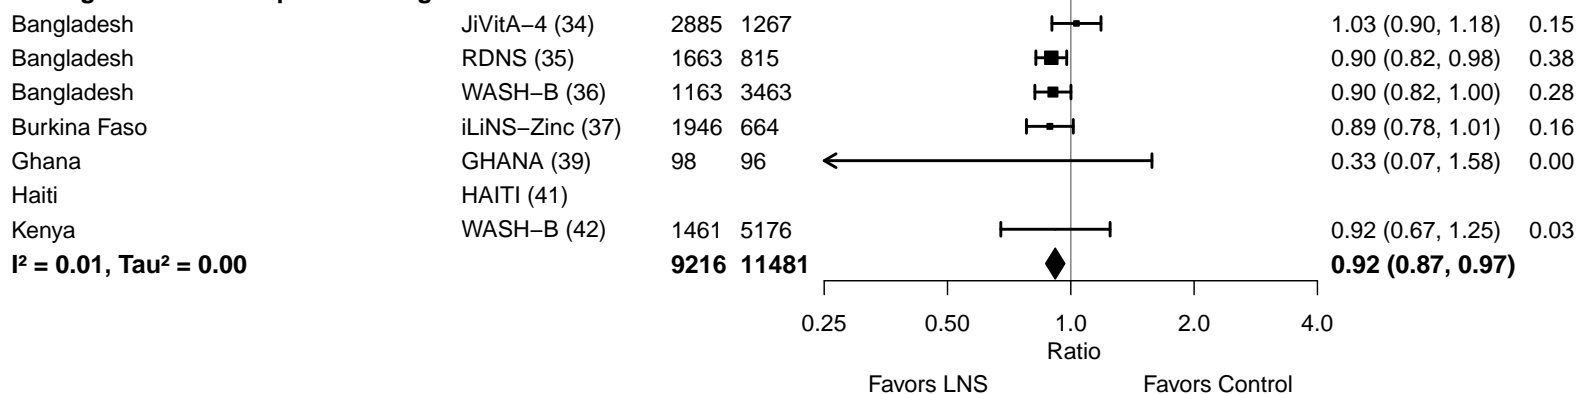

## Supplemental figure 4Q: Small head size prevalence difference

### 4Q1: Stratified by Geographic region

#### Geographic region

(p-diff = 0.664)

#### Geographic region – SEAR

| Country                                             | Trial         | N           | N           | PD<br>(95% CI)             | W    |
|-----------------------------------------------------|---------------|-------------|-------------|----------------------------|------|
| Bangladesh                                          | JiVitA-4 (34) | 2885        | 1267        | 0.00 (-0.03, 0.02)         | 0.48 |
| Bangladesh                                          | RDNS (35)     | 1663        | 815         | -0.04 (-0.09, 0.00)        | 0.20 |
| Bangladesh                                          | WASH-B (36)   | 1163        | 3463        | -0.03 (-0.06, 0.00)        | 0.32 |
| <b>I<sup>2</sup> = 0.50, Tau<sup>2</sup> = 0.00</b> |               | <b>5711</b> | <b>5545</b> | <b>-0.02 (-0.05, 0.00)</b> |      |

#### Geographic region – AFR

|                                                     |                   |             |             |                            |      |
|-----------------------------------------------------|-------------------|-------------|-------------|----------------------------|------|
| Burkina Faso                                        | iLiNS-Zinc (37)   | 1946        | 664         | -0.04 (-0.08, -0.01)       | 0.11 |
| Burkina Faso                                        | PROMIS (38)       |             |             |                            |      |
| Burkina Faso                                        | PROMIS CS (38)    |             |             |                            |      |
| Ghana                                               | GHANA (39)        | 98          | 96          | -0.04 (-0.10, 0.01)        | 0.04 |
| Ghana                                               | iLiNS-DYADG (40)  | 347         | 692         | -0.02 (-0.06, 0.03)        | 0.06 |
| Kenya                                               | WASH-B (42)       | 1461        | 5176        | 0.00 (-0.02, 0.01)         | 0.34 |
| Madagascar                                          | MAHAY (43)        |             |             |                            |      |
| Malawi                                              | iLiNS-DYADM (44)  | 220         | 444         | -0.01 (-0.06, 0.04)        | 0.06 |
| Malawi                                              | iLiNS-DOSE (45)   | 692         | 238         | -0.04 (-0.10, 0.01)        | 0.05 |
| Mali                                                | PROMIS (46)       |             |             |                            |      |
| Mali                                                | PROMIS CS (46)    |             |             |                            |      |
| Zimbabwe                                            | SHINE (HIV-) (47) | 1871        | 1783        | -0.01 (-0.03, 0.00)        | 0.29 |
| Zimbabwe                                            | SHINE (HIV+) (48) | 337         | 329         | 0.00 (-0.05, 0.04)         | 0.06 |
| <b>I<sup>2</sup> = 0.14, Tau<sup>2</sup> = 0.00</b> |                   | <b>6972</b> | <b>9422</b> | <b>-0.01 (-0.03, 0.00)</b> |      |

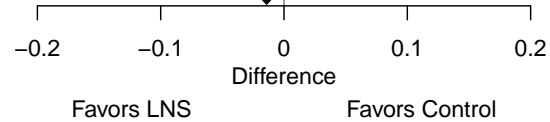

Supplemental figure 4Q: Small head size prevalence difference

4Q2: Stratified by Stunting burden

**Stunting burden**

( $p$ -diff = 0.345)

**Stunting burden – Less than 35%**

| Country                                                   | Trial            | N           | N           |  | PD<br>(95% CI)             | W    |
|-----------------------------------------------------------|------------------|-------------|-------------|--|----------------------------|------|
| Burkina Faso                                              | PROMIS (38)      |             |             |  |                            |      |
| Burkina Faso                                              | PROMIS CS (38)   |             |             |  |                            |      |
| Ghana                                                     | GHANA (39)       | 98          | 96          |  | -0.04 (-0.10, 0.01)        | 0.09 |
| Ghana                                                     | iLiNS-DYADG (40) | 347         | 692         |  | -0.02 (-0.06, 0.03)        | 0.13 |
| Haiti                                                     | HAITI (41)       |             |             |  |                            |      |
| Kenya                                                     | WASH-B (42)      | 1461        | 5176        |  | 0.00 (-0.02, 0.01)         | 0.67 |
| Malawi                                                    | iLiNS-DYADM (44) | 220         | 444         |  | -0.01 (-0.06, 0.04)        | 0.11 |
| <b><math>I^2 = 0.00</math>, <math>Tau^2 = 0.00</math></b> |                  | <b>2126</b> | <b>6408</b> |  | <b>-0.01 (-0.02, 0.00)</b> |      |

**Stunting burden – More than 35%**

|                                                           |                   |              |             |  |                             |      |
|-----------------------------------------------------------|-------------------|--------------|-------------|--|-----------------------------|------|
| Bangladesh                                                | JiVitA-4 (34)     | 2885         | 1267        |  | 0.00 (-0.03, 0.02)          | 0.20 |
| Bangladesh                                                | RDNS (35)         | 1663         | 815         |  | -0.04 (-0.09, 0.00)         | 0.08 |
| Bangladesh                                                | WASH-B (36)       | 1163         | 3463        |  | -0.03 (-0.06, 0.00)         | 0.14 |
| Burkina Faso                                              | iLiNS-Zinc (37)   | 1946         | 664         |  | -0.04 (-0.08, -0.01)        | 0.12 |
| Madagascar                                                | MAHAY (43)        |              |             |  |                             |      |
| Malawi                                                    | iLiNS-DOSE (45)   | 692          | 238         |  | -0.04 (-0.10, 0.01)         | 0.05 |
| Mali                                                      | PROMIS (46)       |              |             |  |                             |      |
| Mali                                                      | PROMIS CS (46)    |              |             |  |                             |      |
| Zimbabwe                                                  | SHINE (HIV-) (47) | 1871         | 1783        |  | -0.01 (-0.03, 0.00)         | 0.33 |
| Zimbabwe                                                  | SHINE (HIV+) (48) | 337          | 329         |  | 0.00 (-0.05, 0.04)          | 0.07 |
| <b><math>I^2 = 0.30</math>, <math>Tau^2 = 0.00</math></b> |                   | <b>10557</b> | <b>8559</b> |  | <b>-0.02 (-0.03, -0.01)</b> |      |

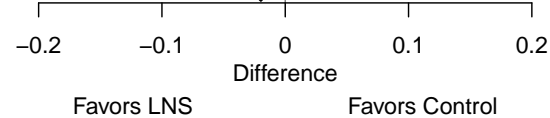

Supplemental figure 4Q: Small head size prevalence difference

4Q3: Stratified by Malaria prevalence

**Malaria prevalence**

(p-diff = 0.025)

**Malaria prevalence – Less than 10%**

| Country                                             | Trial             | N           | N            | PD (95% CI)                | W    |
|-----------------------------------------------------|-------------------|-------------|--------------|----------------------------|------|
| Bangladesh                                          | JiVitA-4 (34)     | 2885        | 1267         | 0.00 (-0.03, 0.02)         | 0.17 |
| Bangladesh                                          | RDNS (35)         | 1663        | 815          | -0.04 (-0.09, 0.00)        | 0.07 |
| Bangladesh                                          | WASH-B (36)       | 1163        | 3463         | -0.03 (-0.06, 0.00)        | 0.11 |
| Haiti                                               | HAITI (41)        |             |              |                            |      |
| Kenya                                               | WASH-B (42)       | 1461        | 5176         | 0.00 (-0.02, 0.01)         | 0.32 |
| Madagascar                                          | MAHAY (43)        |             |              |                            |      |
| Zimbabwe                                            | SHINE (HIV-) (47) | 1871        | 1783         | -0.01 (-0.03, 0.00)        | 0.27 |
| Zimbabwe                                            | SHINE (HIV+) (48) | 337         | 329          | 0.00 (-0.05, 0.04)         | 0.06 |
| <b>I<sup>2</sup> = 0.19, Tau<sup>2</sup> = 0.00</b> |                   | <b>9380</b> | <b>12833</b> | <b>-0.01 (-0.02, 0.00)</b> |      |

**Malaria prevalence – At least 10%**

|                                                     |                  |             |             |                             |      |
|-----------------------------------------------------|------------------|-------------|-------------|-----------------------------|------|
| Burkina Faso                                        | iLiNS-Zinc (37)  | 1946        | 664         | -0.04 (-0.08, -0.01)        | 0.34 |
| Burkina Faso                                        | PROMIS (38)      |             |             |                             |      |
| Burkina Faso                                        | PROMIS CS (38)   |             |             |                             |      |
| Ghana                                               | GHANA (39)       | 98          | 96          | -0.04 (-0.10, 0.01)         | 0.14 |
| Ghana                                               | iLiNS-DYADG (40) | 347         | 692         | -0.02 (-0.06, 0.03)         | 0.20 |
| Malawi                                              | iLiNS-DYADM (44) | 220         | 444         | -0.01 (-0.06, 0.04)         | 0.18 |
| Malawi                                              | iLiNS-DOSE (45)  | 692         | 238         | -0.04 (-0.10, 0.01)         | 0.15 |
| Mali                                                | PROMIS (46)      |             |             |                             |      |
| Mali                                                | PROMIS CS (46)   |             |             |                             |      |
| <b>I<sup>2</sup> = 0.00, Tau<sup>2</sup> = 0.00</b> |                  | <b>3303</b> | <b>2134</b> | <b>-0.03 (-0.05, -0.01)</b> |      |

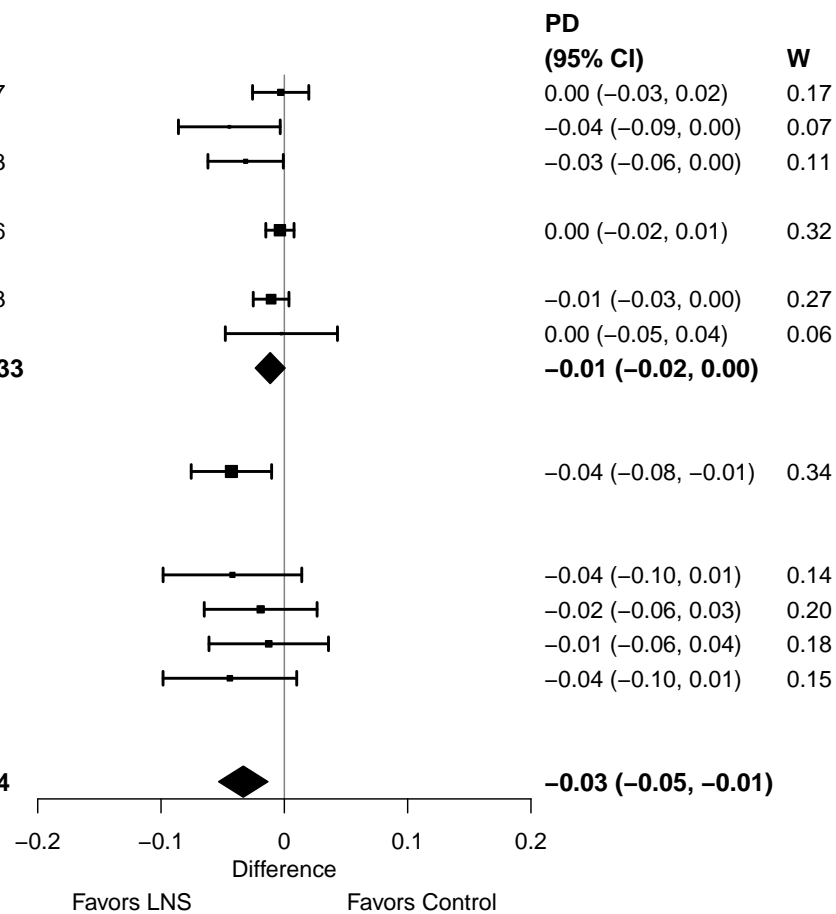

Supplemental figure 4Q: Small head size prevalence difference

4Q4: Stratified by Source water quality

**Source water quality**

(p-diff = 0.301)

**Source water quality – Improved**

| Country    | Trial            | N           | N           |
|------------|------------------|-------------|-------------|
| Bangladesh | JiVitA-4 (34)    | 2885        | 1267        |
| Bangladesh | RDNS (35)        | 1663        | 815         |
| Bangladesh | WASH-B (36)      | 571         | 1121        |
| Ghana      | GHANA (39)       | 98          | 96          |
| Ghana      | iLiNS-DYADG (40) | 347         | 692         |
| Haiti      | HAITI (41)       |             |             |
| Malawi     | iLiNS-DYADM (44) | 220         | 444         |
| Malawi     | iLiNS-DOSE (45)  | 692         | 238         |
|            |                  | <b>6476</b> | <b>4673</b> |

**I<sup>2</sup> = 0.02, Tau<sup>2</sup> = 0.00**

**Source water quality – Unimproved**

|              |                   |             |             |
|--------------|-------------------|-------------|-------------|
| Burkina Faso | iLiNS-Zinc (37)   | 1946        | 664         |
| Burkina Faso | PROMIS (38)       |             |             |
| Burkina Faso | PROMIS CS (38)    |             |             |
| Kenya        | WASH-B (42)       | 696         | 2266        |
| Madagascar   | MAHAY (43)        |             |             |
| Mali         | PROMIS (46)       |             |             |
| Mali         | PROMIS CS (46)    |             |             |
| Zimbabwe     | SHINE (HIV-) (47) | 887         | 873         |
| Zimbabwe     | SHINE (HIV+) (48) | 147         | 146         |
|              |                   | <b>3676</b> | <b>3949</b> |

**I<sup>2</sup> = 0.55, Tau<sup>2</sup> = 0.00**

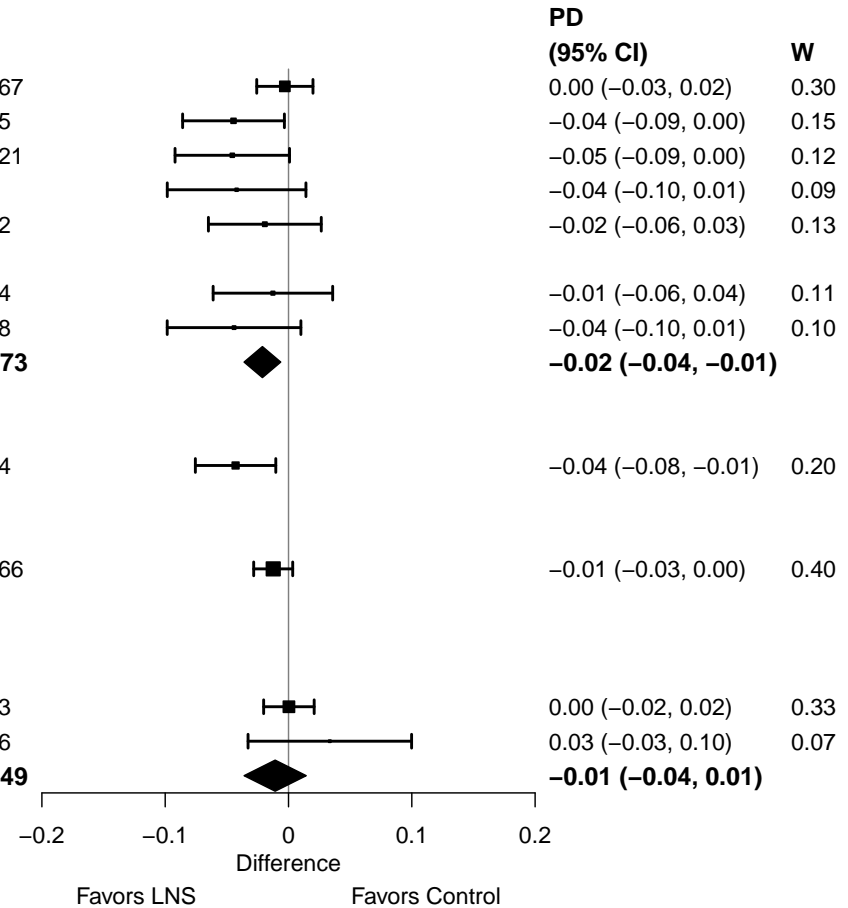



Supplemental figure 4Q: Small head size prevalence difference

4Q5: Stratified by Sanitation

**Sanitation**  
(p-diff = 0.442)

**Sanitation – Improved**

| Country                                             | Trial            | N           | N           |
|-----------------------------------------------------|------------------|-------------|-------------|
| Bangladesh                                          | JiVitA-4 (34)    | 2885        | 1267        |
| Bangladesh                                          | RDNS (35)        | 1663        | 815         |
| Bangladesh                                          | WASH-B (36)      | 571         | 1121        |
| Burkina Faso                                        | PROMIS (38)      |             |             |
| Burkina Faso                                        | PROMIS CS (38)   |             |             |
| Ghana                                               | GHANA (39)       | 98          | 96          |
| Ghana                                               | iLiNS-DYADG (40) | 347         | 692         |
| Haiti                                               | HAITI (41)       |             |             |
| Mali                                                | PROMIS (46)      |             |             |
| Mali                                                | PROMIS CS (46)   |             |             |
| <b>I<sup>2</sup> = 0.24, Tau<sup>2</sup> = 0.00</b> |                  | <b>5564</b> | <b>3991</b> |

**Sanitation – Unimproved**

|                                                     |                   |             |             |
|-----------------------------------------------------|-------------------|-------------|-------------|
| Burkina Faso                                        | iLiNS-Zinc (37)   | 1946        | 664         |
| Kenya                                               | WASH-B (42)       | 696         | 2266        |
| Madagascar                                          | MAHAY (43)        |             |             |
| Malawi                                              | iLiNS-DYADM (44)  | 220         | 444         |
| Malawi                                              | iLiNS-DOSE (45)   | 692         | 238         |
| Zimbabwe                                            | SHINE (HIV-) (47) | 887         | 873         |
| Zimbabwe                                            | SHINE (HIV+) (48) | 147         | 146         |
| <b>I<sup>2</sup> = 0.38, Tau<sup>2</sup> = 0.00</b> |                   | <b>4588</b> | <b>4631</b> |

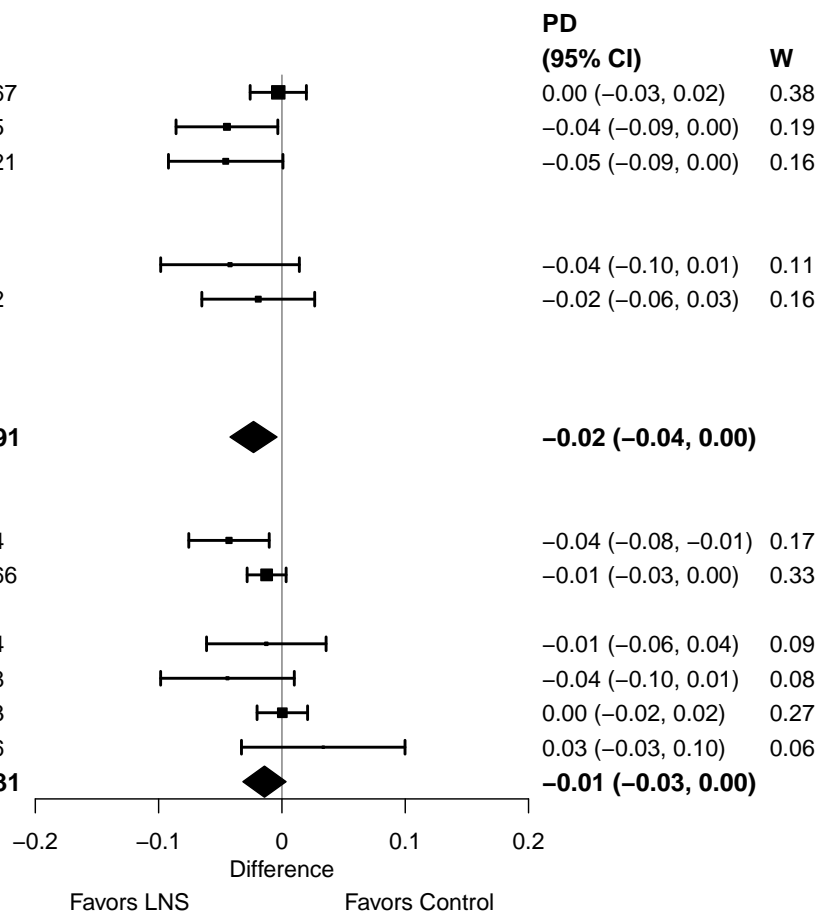

Supplemental figure 4Q: Small head size prevalence difference

4Q6: Stratified by Supplement duration

**Supplement duration**

(p-diff = 0.995)

**Supplement duration – 12m or less**

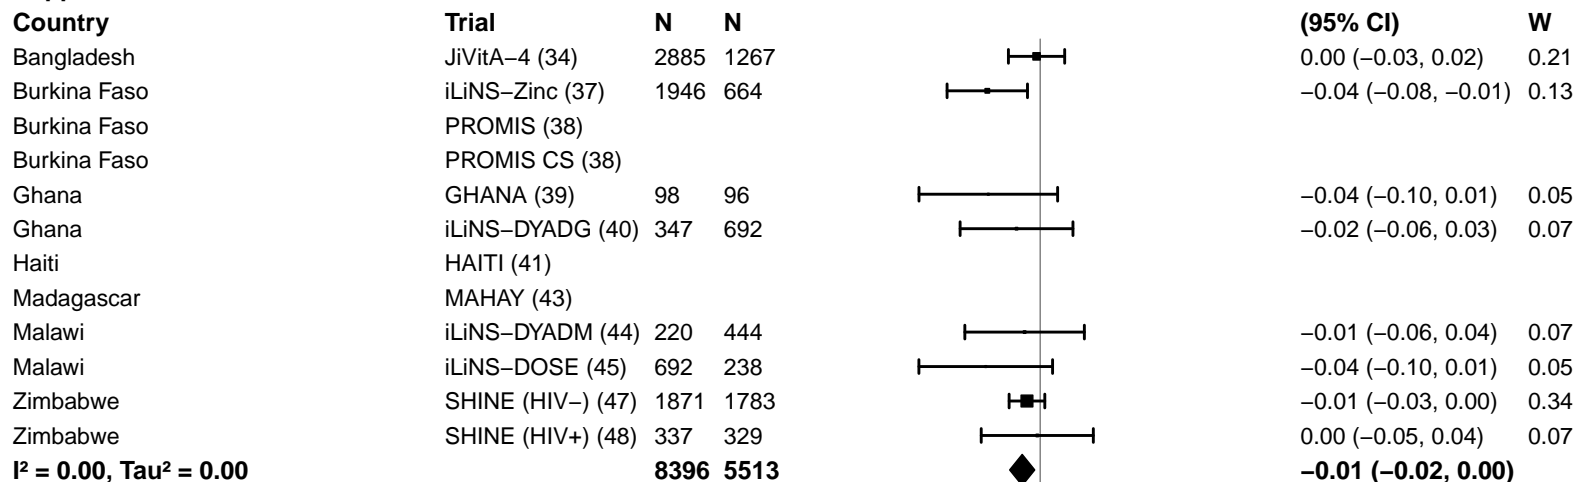

**Supplement duration – > 12m**

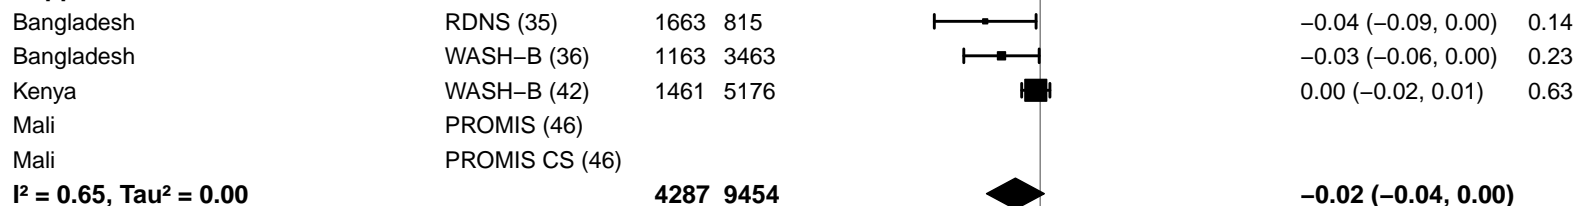

-0.2 -0.1 0 0.1 0.2  
Difference  
Favors LNS Favors Control

Supplemental figure 4Q: Small head size prevalence difference

4Q7: Stratified by Frequency of contact

**Frequency of contact**

(p-diff = 0.091)

**Frequency of contact – Monthly**

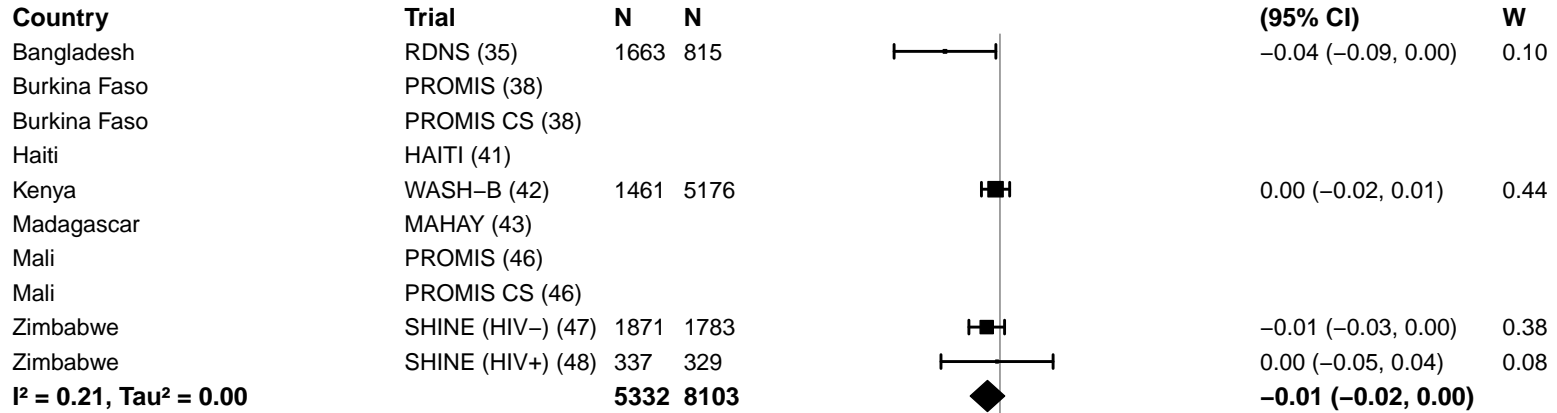

**Frequency of contact – Weekly**

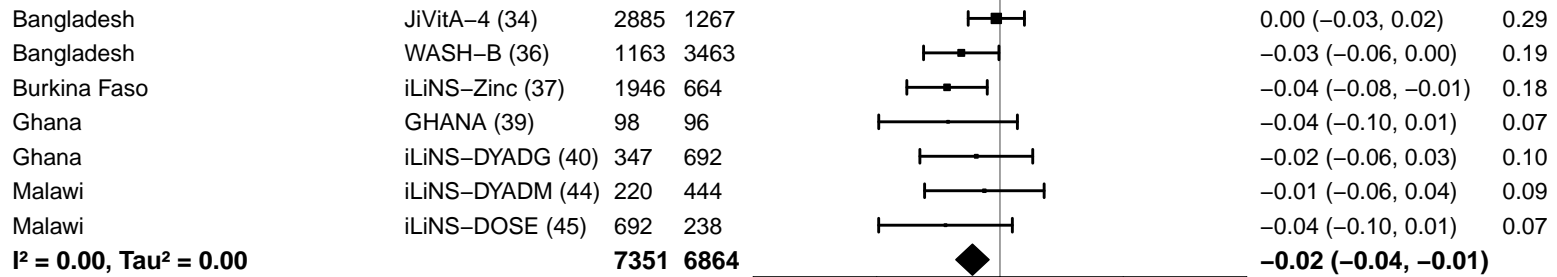

-0.2 -0.1 0 0.1 0.2  
Difference  
Favors LNS Favors Control

Supplemental figure 4Q: Small head size prevalence difference

4Q8: Stratified by Average SQ-LNS compliance

**Average SQ-LNS compliance**

( $p$ -diff = 0.682)

**Average SQ-LNS compliance – Low**

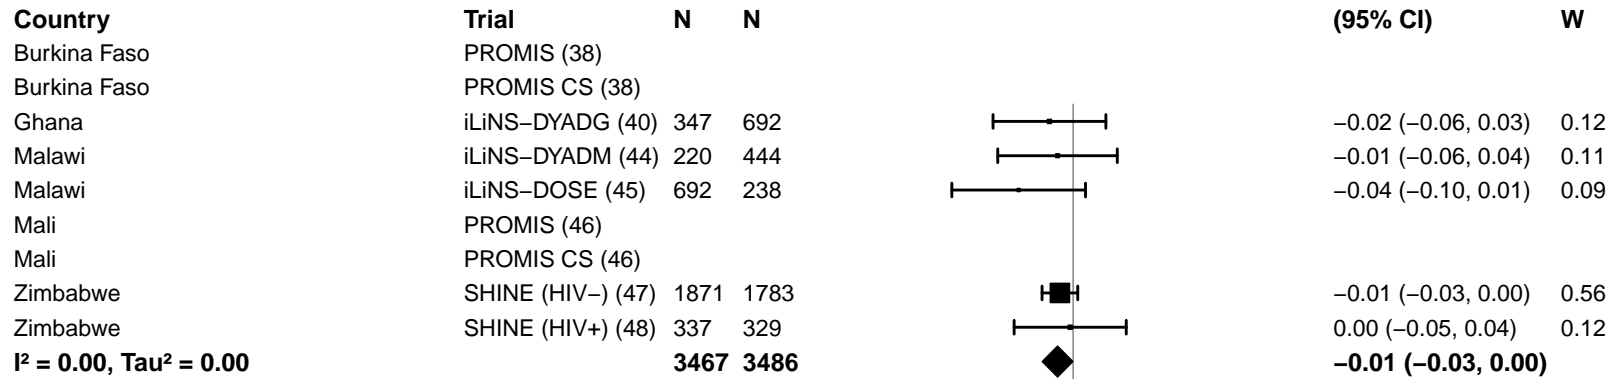

**Average SQ-LNS compliance – High**

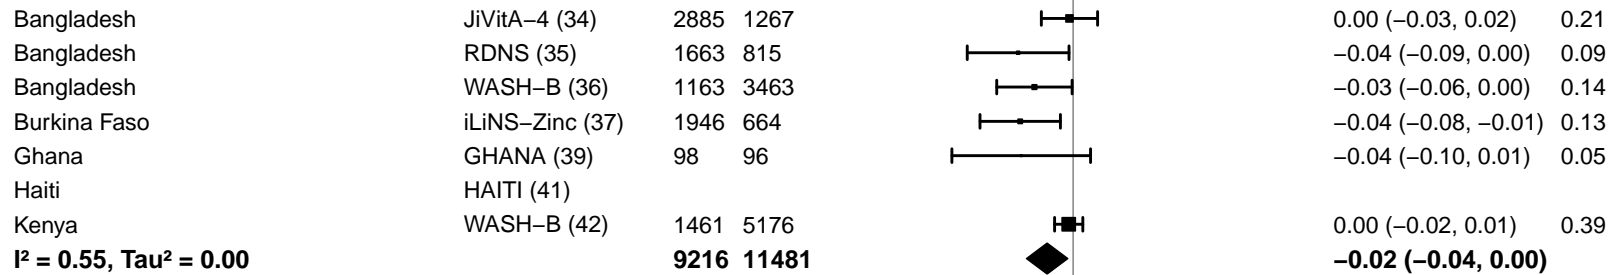

# Supplemental figure 5: Pooled effect of SQ-LNS on prevalence ratios for low MUAC, acute malnutrition, underweight, and small head size stratified by study-level and individual-level characteristics

## Contents

|                                                                                  |           |
|----------------------------------------------------------------------------------|-----------|
| <b>Supplemental figure 5A: Low MUAC prevalence ratio</b>                         | <b>2</b>  |
| 5A1: Stratified by study-level characteristics . . . . .                         | 2         |
| 5A2: Stratified by individual-level maternal and child characteristics . . . . . | 3         |
| 5A3: Stratified by individual-level household characteristics . . . . .          | 4         |
| <b>Supplemental figure 5B: Acute malnutrition prevalence ratio</b>               | <b>5</b>  |
| 5B1: Stratified by study-level characteristics . . . . .                         | 5         |
| 5B2: Stratified by individual-level maternal and child characteristics . . . . . | 6         |
| 5B3: Stratified by individual-level household characteristics . . . . .          | 7         |
| <b>Supplemental figure 5C: Underweight prevalence ratio</b>                      | <b>8</b>  |
| 5C1: Stratified by study-level characteristics . . . . .                         | 8         |
| 5C2: Stratified by individual-level maternal and child characteristics . . . . . | 9         |
| 5C3: Stratified by individual-level household characteristics . . . . .          | 10        |
| <b>Supplemental figure 5D: Small head size prevalence ratio</b>                  | <b>11</b> |
| 5D1: Stratified by study-level characteristics . . . . .                         | 11        |
| 5D2: Stratified by individual-level maternal and child characteristics . . . . . | 12        |
| 5D3: Stratified by individual-level household characteristics . . . . .          | 13        |

These figures show pooled effects of SQ-LNS within study-level and individual-level characteristic subgroups along with the p-for-interaction. The labels on the left y-axis correspond to the characteristic subgroups and their sample sizes. The values on the right indicate the pooled prevalence ratio and confidence interval within that subgroup. MUAC, mid-upper arm circumference.

## Supplemental figure 5A: Low MUAC prevalence ratio

### 5A1: Stratified by study-level characteristics

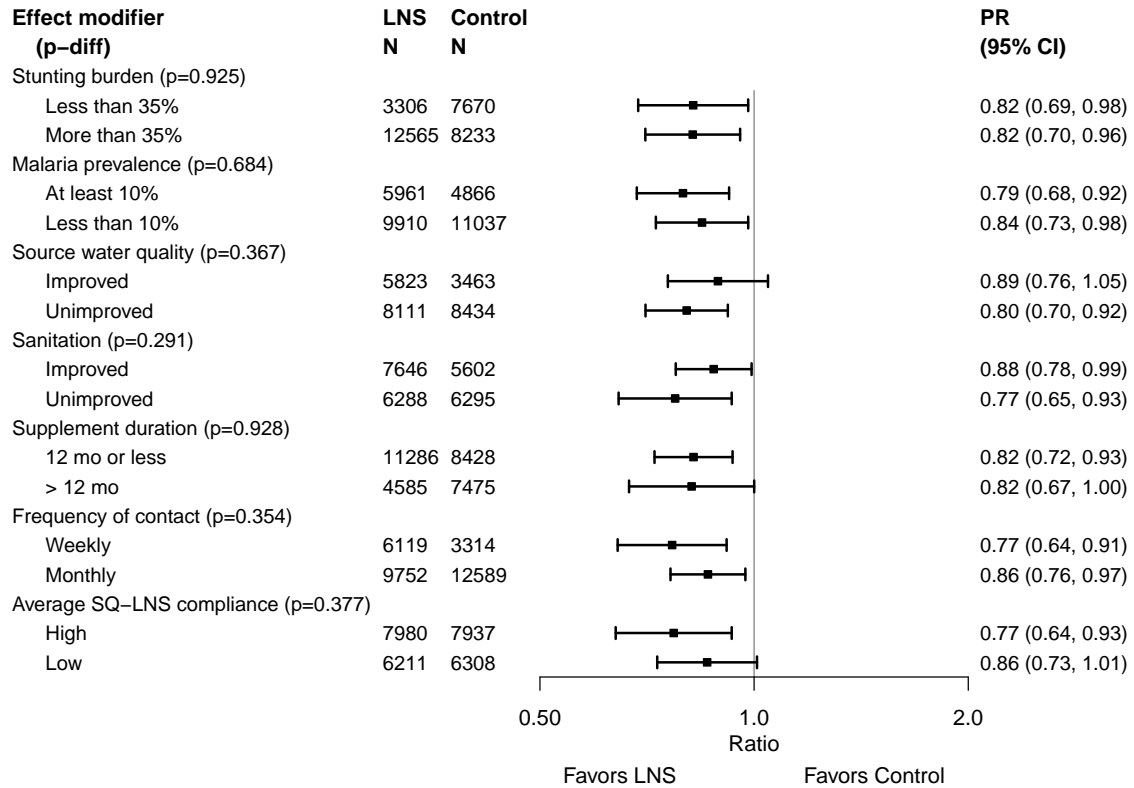

Supplemental figure 5A: Low MUAC prevalence ratio

5A2: Stratified by individual-level maternal and child characteristics

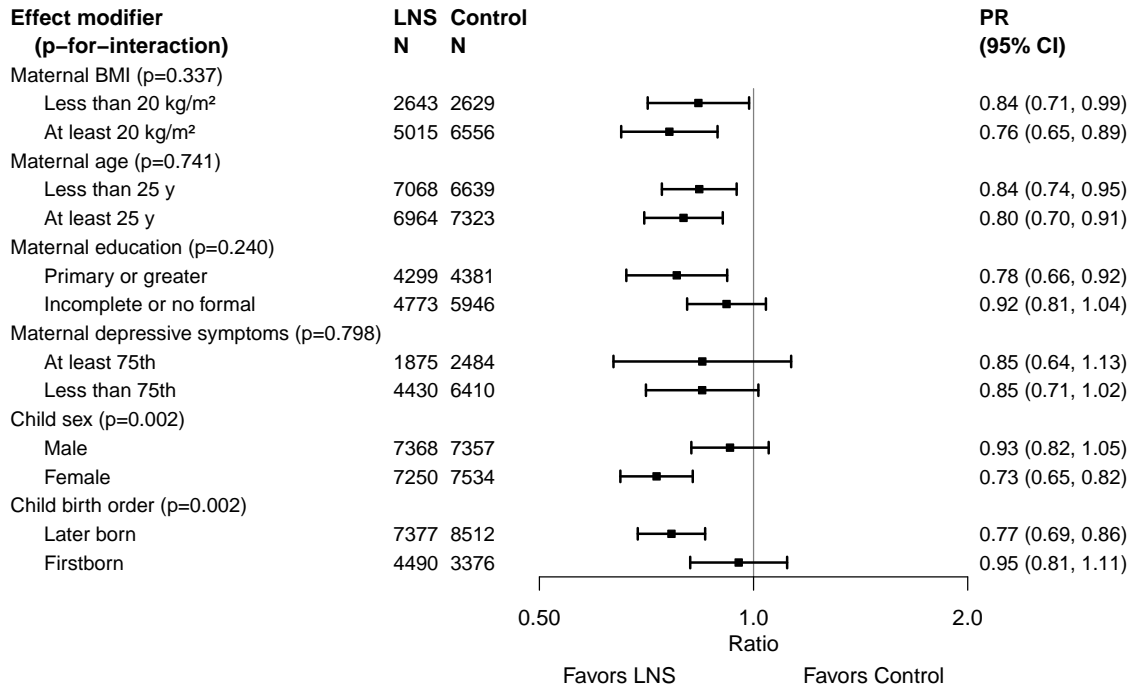

Supplemental figure 5A: Low MUAC prevalence ratio

5A3: Stratified by individual-level household characteristics

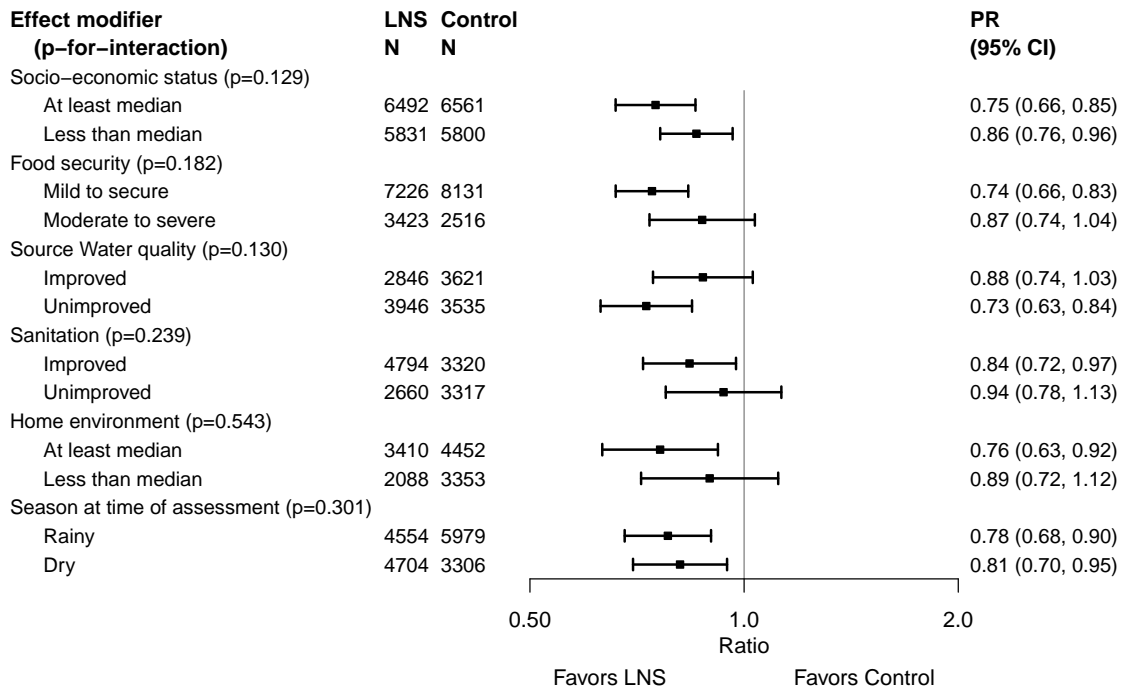



## Supplemental figure 5B: Acute malnutrition prevalence ratio

### 5B1: Stratified by study-level characteristics

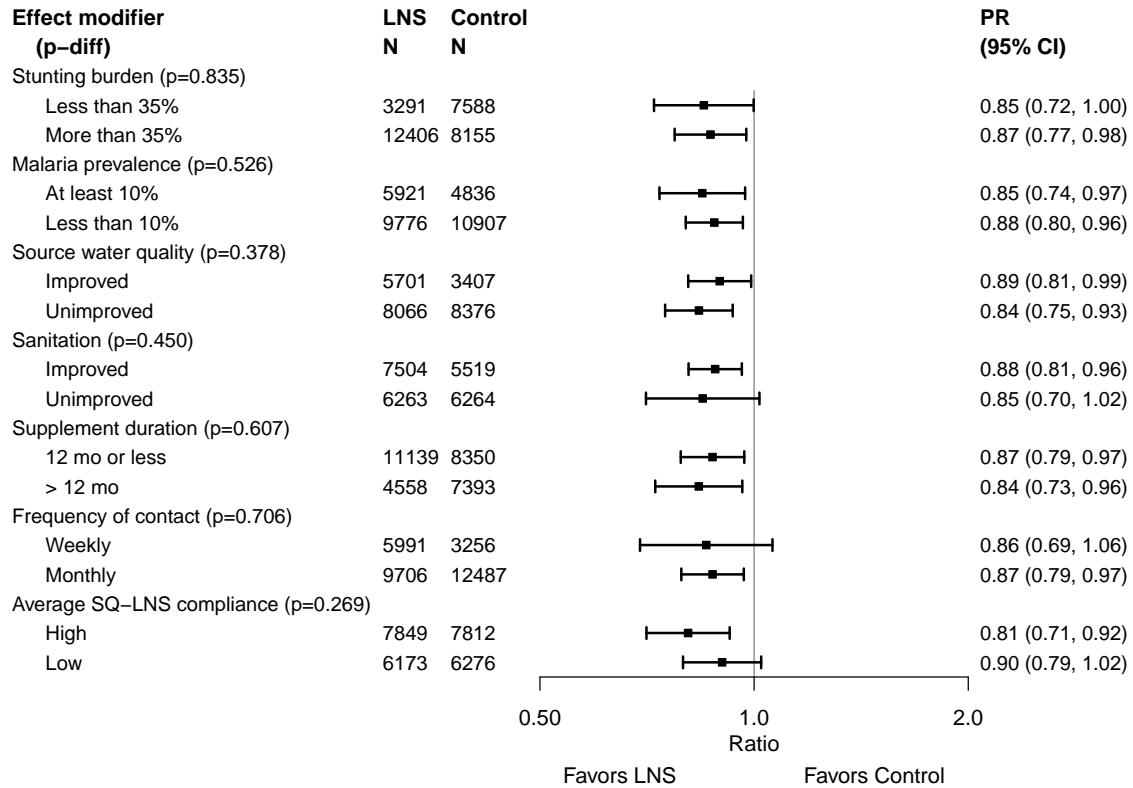



Supplemental figure 5B: Acute malnutrition prevalence ratio

5B3: Stratified by individual-level household characteristics

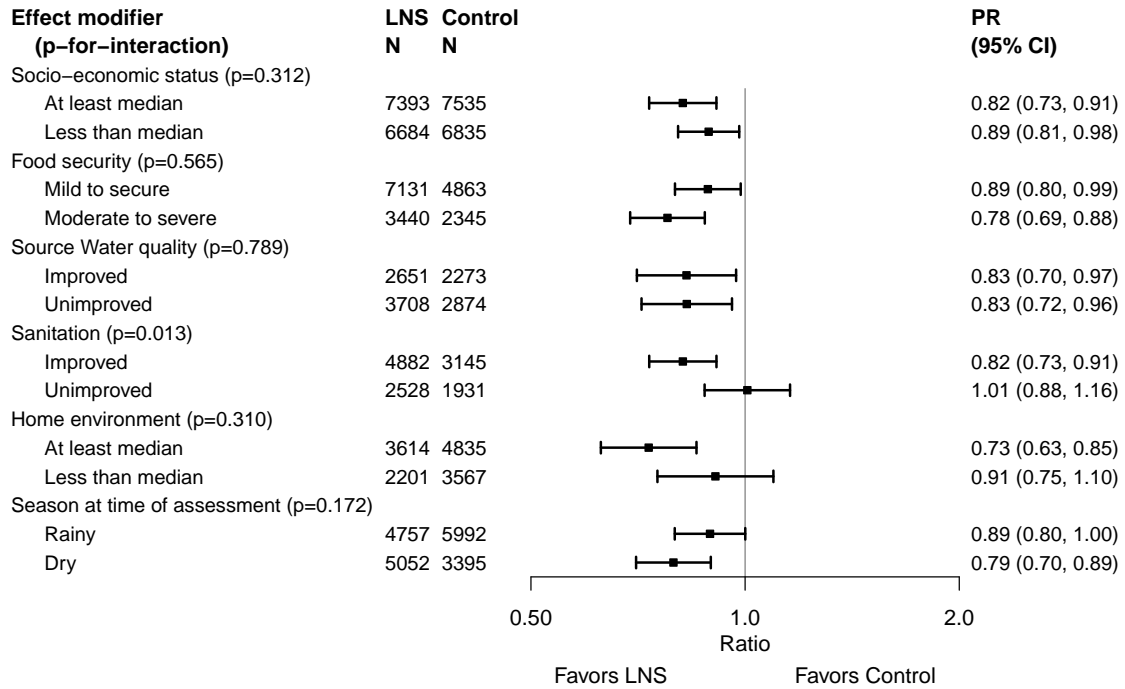

## Supplemental figure 5C: Underweight prevalence ratio

### 5C1: Stratified by study-level characteristics

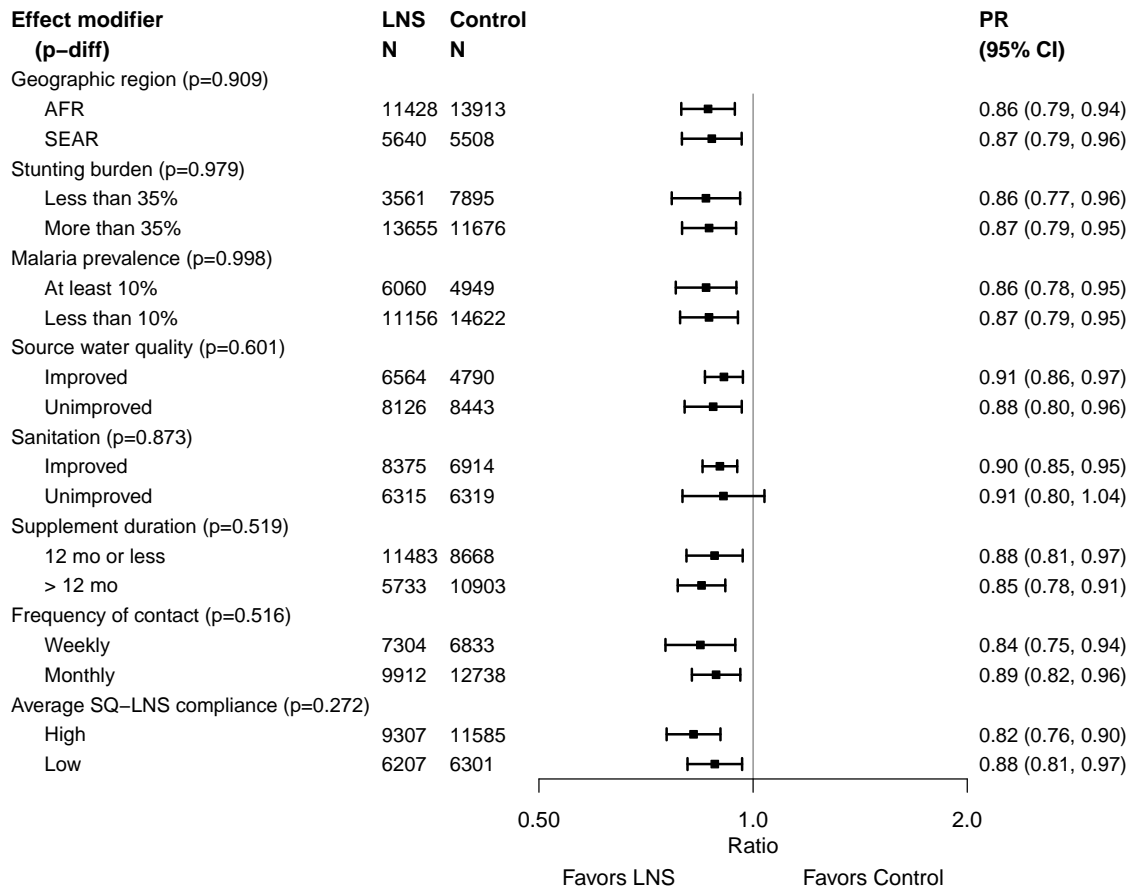

Supplemental figure 5C: Underweight prevalence ratio

5C2: Stratified by individual-level maternal and child characteristics

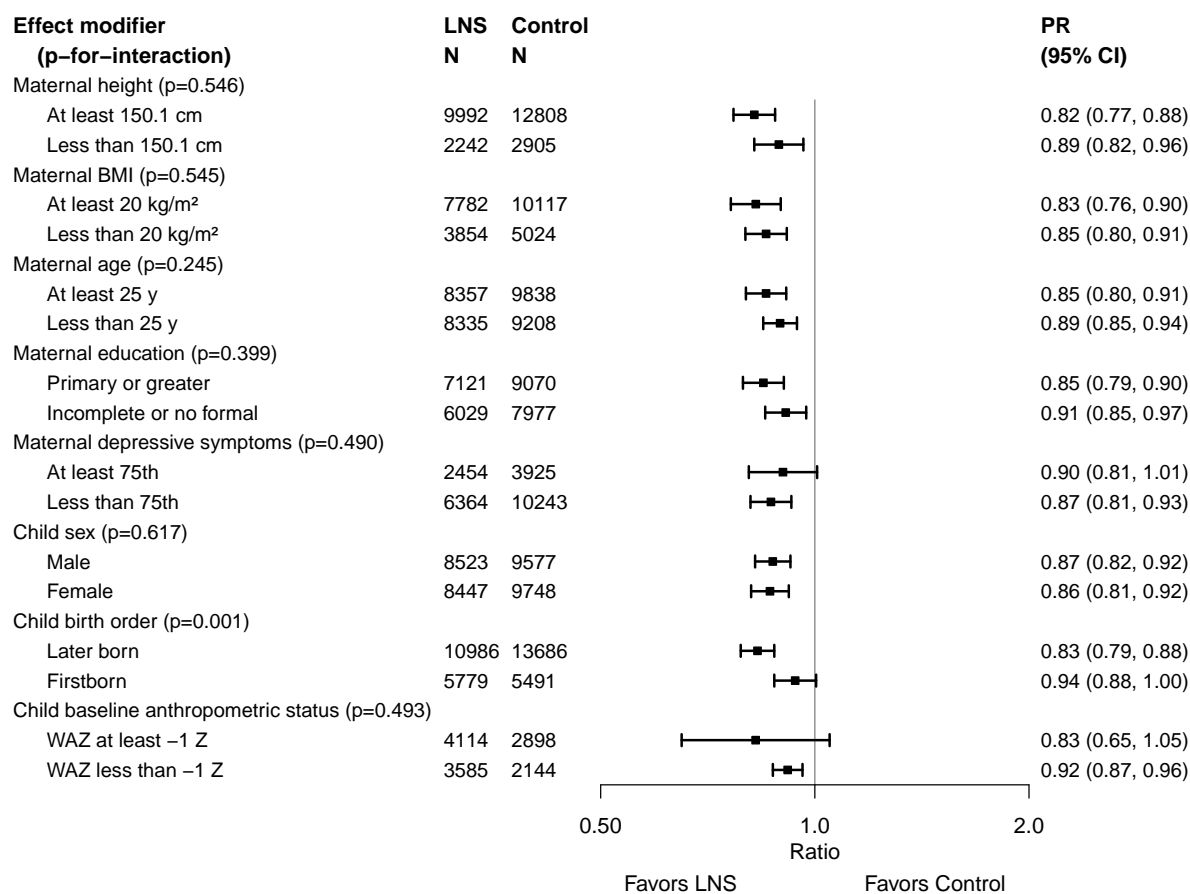

Supplemental figure 5C: Underweight prevalence ratio

5C3: Stratified by individual-level household characteristics

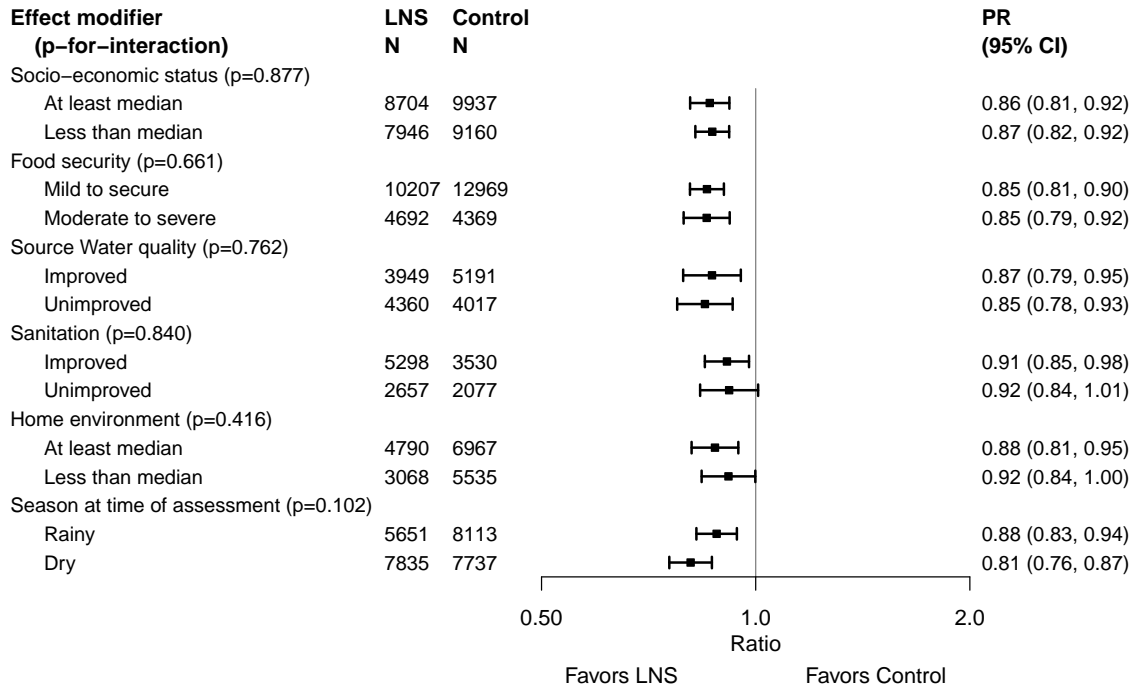

## Supplemental figure 5D: Small head size prevalence ratio

### 5D1: Stratified by study-level characteristics

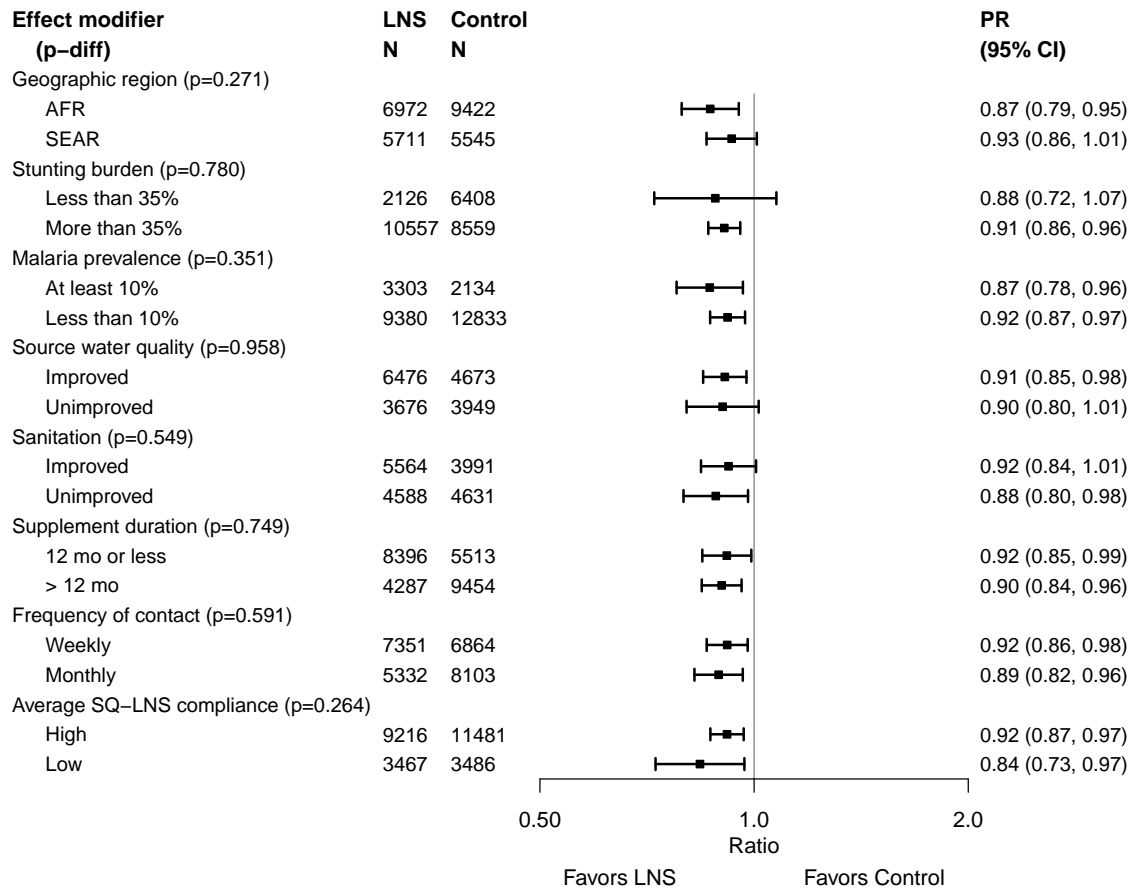

Supplemental figure 5D: Small head size prevalence ratio

5D2: Stratified by individual-level maternal and child characteristics

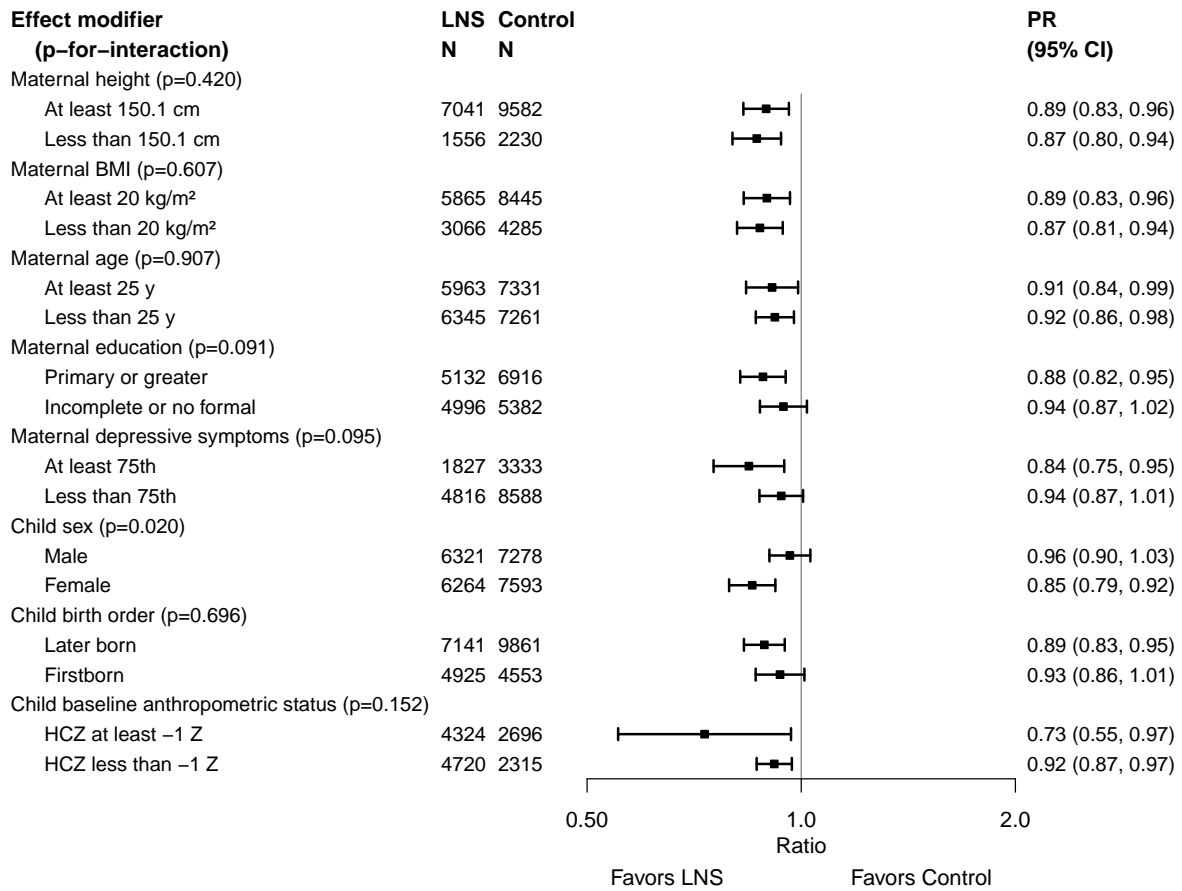



Supplemental figure 5D: Small head size prevalence ratio

5D3: Stratified by individual-level household characteristics

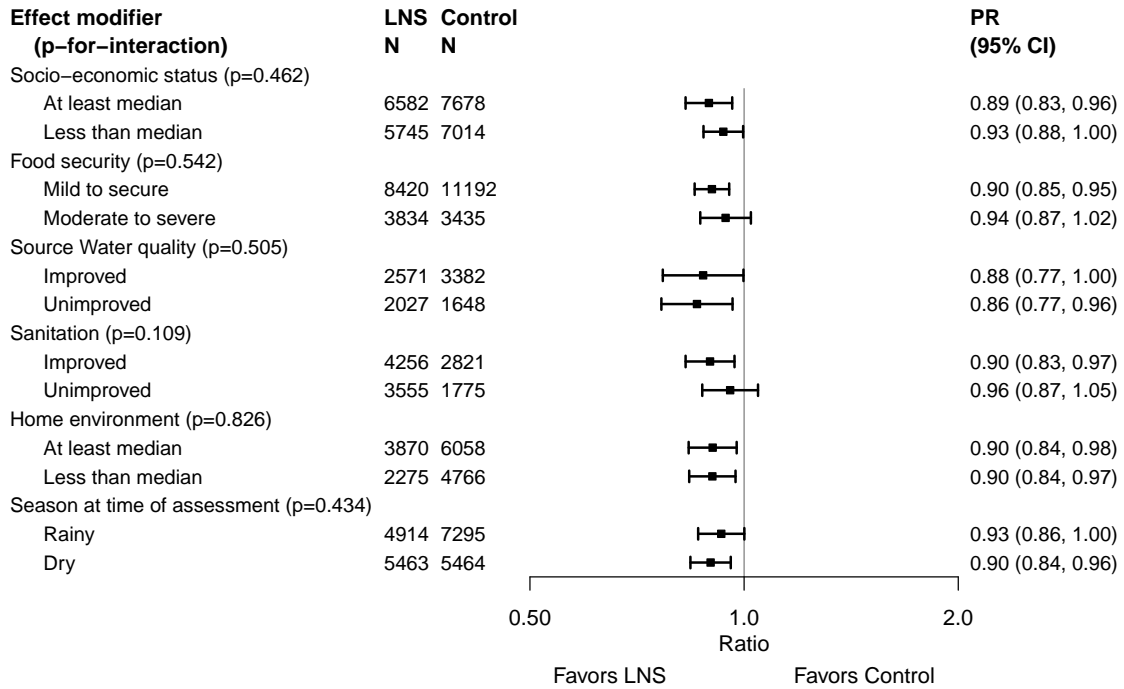

## Supplemental figure 6: Forest plots for effects of SQ-LNS on growth outcomes stratified by individual-level maternal and child effect modifiers

### Contents

|                                                                   |               |
|-------------------------------------------------------------------|---------------|
| <b>Supplemental figure 6A: Mean difference in LAZ</b>             | <b>5</b>      |
| 6A1: Stratified by Maternal height . . . . .                      | 5             |
| 6A2: Stratified by Maternal BMI . . . . .                         | 6             |
| 6A3: Stratified by Maternal age . . . . .                         | 7             |
| 6A4: Stratified by Maternal education . . . . .                   | 8             |
| 6A5: Stratified by Maternal depressive symptoms . . . . .         | 9             |
| 6A6: Stratified by Child sex . . . . .                            | 10            |
| 6A7: Stratified by Child birth order . . . . .                    | 11            |
| 6A8: Stratified by Child baseline anthropometric status . . . . . | 12            |
| <br><b>Supplemental figure 6B: Stunting prevalence ratio</b>      | <br><b>13</b> |
| 6B1: Stratified by Maternal height . . . . .                      | 13            |
| 6B2: Stratified by Maternal BMI . . . . .                         | 14            |
| 6B3: Stratified by Maternal age . . . . .                         | 15            |
| 6B4: Stratified by Maternal education . . . . .                   | 16            |
| 6B5: Stratified by Maternal depressive symptoms . . . . .         | 17            |
| 6B6: Stratified by Child sex . . . . .                            | 18            |
| 6B7: Stratified by Child birth order . . . . .                    | 19            |
| 6B8: Stratified by Child baseline anthropometric status . . . . . | 20            |
| <br><b>Supplemental figure 6C: Stunting prevalence difference</b> | <br><b>21</b> |
| 6C1: Stratified by Maternal height . . . . .                      | 21            |
| 6C2: Stratified by Maternal BMI . . . . .                         | 22            |
| 6C3: Stratified by Maternal age . . . . .                         | 23            |
| 6C4: Stratified by Maternal education . . . . .                   | 24            |
| 6C5: Stratified by Maternal depressive symptoms . . . . .         | 25            |
| 6C6: Stratified by Child sex . . . . .                            | 26            |
| 6C7: Stratified by Child birth order . . . . .                    | 27            |
| 6C8: Stratified by Child baseline anthropometric status . . . . . | 28            |
| <br><b>Supplemental figure 6D: Mean difference in WLZ</b>         | <br><b>29</b> |
| 6D1: Stratified by Maternal height . . . . .                      | 29            |
| 6D2: Stratified by Maternal BMI . . . . .                         | 30            |
| 6D3: Stratified by Maternal age . . . . .                         | 31            |
| 6D4: Stratified by Maternal education . . . . .                   | 32            |
| 6D5: Stratified by Maternal depressive symptoms . . . . .         | 33            |
| 6D6: Stratified by Child sex . . . . .                            | 34            |
| 6D7: Stratified by Child birth order . . . . .                    | 35            |
| 6D8: Stratified by Child baseline anthropometric status . . . . . | 36            |
| <br><b>Supplemental figure 6E: Wasting prevalence ratio</b>       | <br><b>37</b> |

|                                                                                              |           |
|----------------------------------------------------------------------------------------------|-----------|
| 6E1: Stratified by Maternal height . . . . .                                                 | 37        |
| 6E2: Stratified by Maternal BMI . . . . .                                                    | 38        |
| 6E3: Stratified by Maternal age . . . . .                                                    | 39        |
| 6E4: Stratified by Maternal education . . . . .                                              | 40        |
| 6E5: Stratified by Maternal depressive symptoms . . . . .                                    | 41        |
| 6E6: Stratified by Child sex . . . . .                                                       | 42        |
| 6E7: Stratified by Child birth order . . . . .                                               | 43        |
| 6E8: Stratified by Child baseline anthropometric status . . . . .                            | 44        |
| <b>Supplemental figure 6F: Wasting prevalence difference</b>                                 | <b>45</b> |
| 6F1: Stratified by Maternal height . . . . .                                                 | 45        |
| 6F2: Stratified by Maternal BMI . . . . .                                                    | 46        |
| 6F3: Stratified by Maternal age . . . . .                                                    | 47        |
| 6F4: Stratified by Maternal education . . . . .                                              | 48        |
| 6F5: Stratified by Maternal depressive symptoms . . . . .                                    | 49        |
| 6F6: Stratified by Child sex . . . . .                                                       | 50        |
| 6F7: Stratified by Child birth order . . . . .                                               | 51        |
| 6F8: Stratified by Child baseline anthropometric status . . . . .                            | 52        |
| <b>Supplemental figure 6G: Mean difference in MUACZ</b>                                      | <b>53</b> |
| 6G1: Stratified by Maternal height . . . . .                                                 | 53        |
| 6G2: Stratified by Maternal BMI . . . . .                                                    | 54        |
| 6G3: Stratified by Maternal age . . . . .                                                    | 55        |
| 6G4: Stratified by Maternal education . . . . .                                              | 56        |
| 6G5: Stratified by Maternal depressive symptoms . . . . .                                    | 57        |
| 6G6: Stratified by Child sex . . . . .                                                       | 58        |
| 6G7: Stratified by Child birth order . . . . .                                               | 59        |
| 6G8: Stratified by Child baseline anthropometric status . . . . .                            | 60        |
| <b>Supplemental figure 6H: Low MUAC prevalence ratio</b>                                     | <b>61</b> |
| 6H1: Stratified by Maternal height (insufficient comparisons) . . . . .                      | 61        |
| 6H2: Stratified by Maternal BMI . . . . .                                                    | 62        |
| 6H3: Stratified by Maternal age . . . . .                                                    | 63        |
| 6H4: Stratified by Maternal education . . . . .                                              | 64        |
| 6H5: Stratified by Maternal depressive symptoms . . . . .                                    | 65        |
| 6H6: Stratified by Child sex . . . . .                                                       | 66        |
| 6H7: Stratified by Child birth order . . . . .                                               | 67        |
| 6H8: Stratified by Child baseline anthropometric status (insufficient comparisons) . . . . . | 67        |
| <b>Supplemental figure 6I: Low MUAC prevalence difference</b>                                | <b>68</b> |
| 6I1: Stratified by Maternal height (insufficient comparisons) . . . . .                      | 68        |
| 6I2: Stratified by Maternal BMI . . . . .                                                    | 69        |
| 6I3: Stratified by Maternal age . . . . .                                                    | 70        |
| 6I4: Stratified by Maternal education . . . . .                                              | 71        |
| 6I5: Stratified by Maternal depressive symptoms . . . . .                                    | 72        |
| 6I6: Stratified by Child sex . . . . .                                                       | 73        |
| 6I7: Stratified by Child birth order . . . . .                                               | 74        |
| 6I8: Stratified by Child baseline anthropometric status (insufficient comparisons) . . . . . | 74        |
| <b>Supplemental figure 6J: Acute malnutrition prevalence ratio</b>                           | <b>75</b> |
| 6J1: Stratified by Maternal height . . . . .                                                 | 75        |

|                                                                         |            |
|-------------------------------------------------------------------------|------------|
| 6J2: Stratified by Maternal BMI . . . . .                               | 76         |
| 6J3: Stratified by Maternal age . . . . .                               | 77         |
| 6J4: Stratified by Maternal education . . . . .                         | 78         |
| 6J5: Stratified by Maternal depressive symptoms . . . . .               | 79         |
| 6J6: Stratified by Child sex . . . . .                                  | 80         |
| 6J7: Stratified by Child birth order . . . . .                          | 81         |
| 6J8: Stratified by Child baseline anthropometric status . . . . .       | 82         |
| <b>Supplemental figure 6K: Acute malnutrition prevalence difference</b> | <b>83</b>  |
| 6K1: Stratified by Maternal height . . . . .                            | 83         |
| 6K2: Stratified by Maternal BMI . . . . .                               | 84         |
| 6K3: Stratified by Maternal age . . . . .                               | 85         |
| 6K4: Stratified by Maternal education . . . . .                         | 86         |
| 6K5: Stratified by Maternal depressive symptoms . . . . .               | 87         |
| 6K6: Stratified by Child sex . . . . .                                  | 88         |
| 6K7: Stratified by Child birth order . . . . .                          | 89         |
| 6K8: Stratified by Child baseline anthropometric status . . . . .       | 90         |
| <b>Supplemental figure 6L: Mean difference in WAZ</b>                   | <b>91</b>  |
| 6L1: Stratified by Maternal height . . . . .                            | 91         |
| 6L2: Stratified by Maternal BMI . . . . .                               | 92         |
| 6L3: Stratified by Maternal age . . . . .                               | 93         |
| 6L4: Stratified by Maternal education . . . . .                         | 94         |
| 6L5: Stratified by Maternal depressive symptoms . . . . .               | 95         |
| 6L6: Stratified by Child sex . . . . .                                  | 96         |
| 6L7: Stratified by Child birth order . . . . .                          | 97         |
| 6L8: Stratified by Child baseline anthropometric status . . . . .       | 98         |
| <b>Supplemental figure 6M: Underweight prevalence ratio</b>             | <b>99</b>  |
| 6M1: Stratified by Maternal height . . . . .                            | 99         |
| 6M2: Stratified by Maternal BMI . . . . .                               | 100        |
| 6M3: Stratified by Maternal age . . . . .                               | 101        |
| 6M4: Stratified by Maternal education . . . . .                         | 102        |
| 6M5: Stratified by Maternal depressive symptoms . . . . .               | 103        |
| 6M6: Stratified by Child sex . . . . .                                  | 104        |
| 6M7: Stratified by Child birth order . . . . .                          | 105        |
| 6M8: Stratified by Child baseline anthropometric status . . . . .       | 106        |
| <b>Supplemental figure 6N: Underweight prevalence difference</b>        | <b>107</b> |
| 6N1: Stratified by Maternal height . . . . .                            | 107        |
| 6N2: Stratified by Maternal BMI . . . . .                               | 108        |
| 6N3: Stratified by Maternal age . . . . .                               | 109        |
| 6N4: Stratified by Maternal education . . . . .                         | 110        |
| 6N5: Stratified by Maternal depressive symptoms . . . . .               | 111        |
| 6N6: Stratified by Child sex . . . . .                                  | 112        |
| 6N7: Stratified by Child birth order . . . . .                          | 113        |
| 6N8: Stratified by Child baseline anthropometric status . . . . .       | 114        |
| <b>Supplemental figure 6O: Mean difference in HCZ</b>                   | <b>115</b> |
| 6O1: Stratified by Maternal height . . . . .                            | 115        |
| 6O2: Stratified by Maternal BMI . . . . .                               | 116        |

|                                                                      |            |
|----------------------------------------------------------------------|------------|
| 6O3: Stratified by Maternal age . . . . .                            | 117        |
| 6O4: Stratified by Maternal education . . . . .                      | 118        |
| 6O5: Stratified by Maternal depressive symptoms . . . . .            | 119        |
| 6O6: Stratified by Child sex . . . . .                               | 120        |
| 6O7: Stratified by Child birth order . . . . .                       | 121        |
| 6O8: Stratified by Child baseline anthropometric status . . . . .    | 122        |
| <b>Supplemental figure 6P: Small head size prevalence ratio</b>      | <b>123</b> |
| 6P1: Stratified by Maternal height . . . . .                         | 123        |
| 6P2: Stratified by Maternal BMI . . . . .                            | 124        |
| 6P3: Stratified by Maternal age . . . . .                            | 125        |
| 6P4: Stratified by Maternal education . . . . .                      | 126        |
| 6P5: Stratified by Maternal depressive symptoms . . . . .            | 127        |
| 6P6: Stratified by Child sex . . . . .                               | 128        |
| 6P7: Stratified by Child birth order . . . . .                       | 129        |
| 6P8: Stratified by Child baseline anthropometric status . . . . .    | 130        |
| <b>Supplemental figure 6Q: Small head size prevalence difference</b> | <b>131</b> |
| 6Q1: Stratified by Maternal height . . . . .                         | 131        |
| 6Q2: Stratified by Maternal BMI . . . . .                            | 132        |
| 6Q3: Stratified by Maternal age . . . . .                            | 133        |
| 6Q4: Stratified by Maternal education . . . . .                      | 134        |
| 6Q5: Stratified by Maternal depressive symptoms . . . . .            | 135        |
| 6Q6: Stratified by Child sex . . . . .                               | 136        |
| 6Q7: Stratified by Child birth order . . . . .                       | 137        |
| 6Q8: Stratified by Child baseline anthropometric status . . . . .    | 138        |

These figures are forest plots showing the individual-level effect modification of intervention effects. Each figure has the estimates of intervention effect stratified within study by individual-level effect modifier category. For continuous outcomes analyzed via mean differences, the effect estimate is the mean in the LNS group minus the mean in the control group. For dichotomous outcomes analyzed via prevalence ratios, the effect estimate is the prevalence in the LNS group divided by the prevalence in the control group. For dichotomous outcomes analyzed via prevalence differences, the effect estimate is the prevalence in the LNS group minus the prevalence in the control group. The labels on the far left correspond to trial level information. In the middle left and on the right the values indicate the study level effect estimate, confidence interval, and weighting for deriving the pooled estimates is shown by subgroup. LAZ, length-for-age z-score; WLZ, weight-for-length z-score; WAZ, weight-for-age z-score; MUACZ, mid-upper arm circumference z-score; HCZ, head circumference-for-age z-score.

### Supplemental figure 6A: Mean difference in LAZ

#### 6A1: Stratified by Maternal height

P-for-interaction = 0.215

Difference in MDs = -0.04 (-0.11, 0.02)

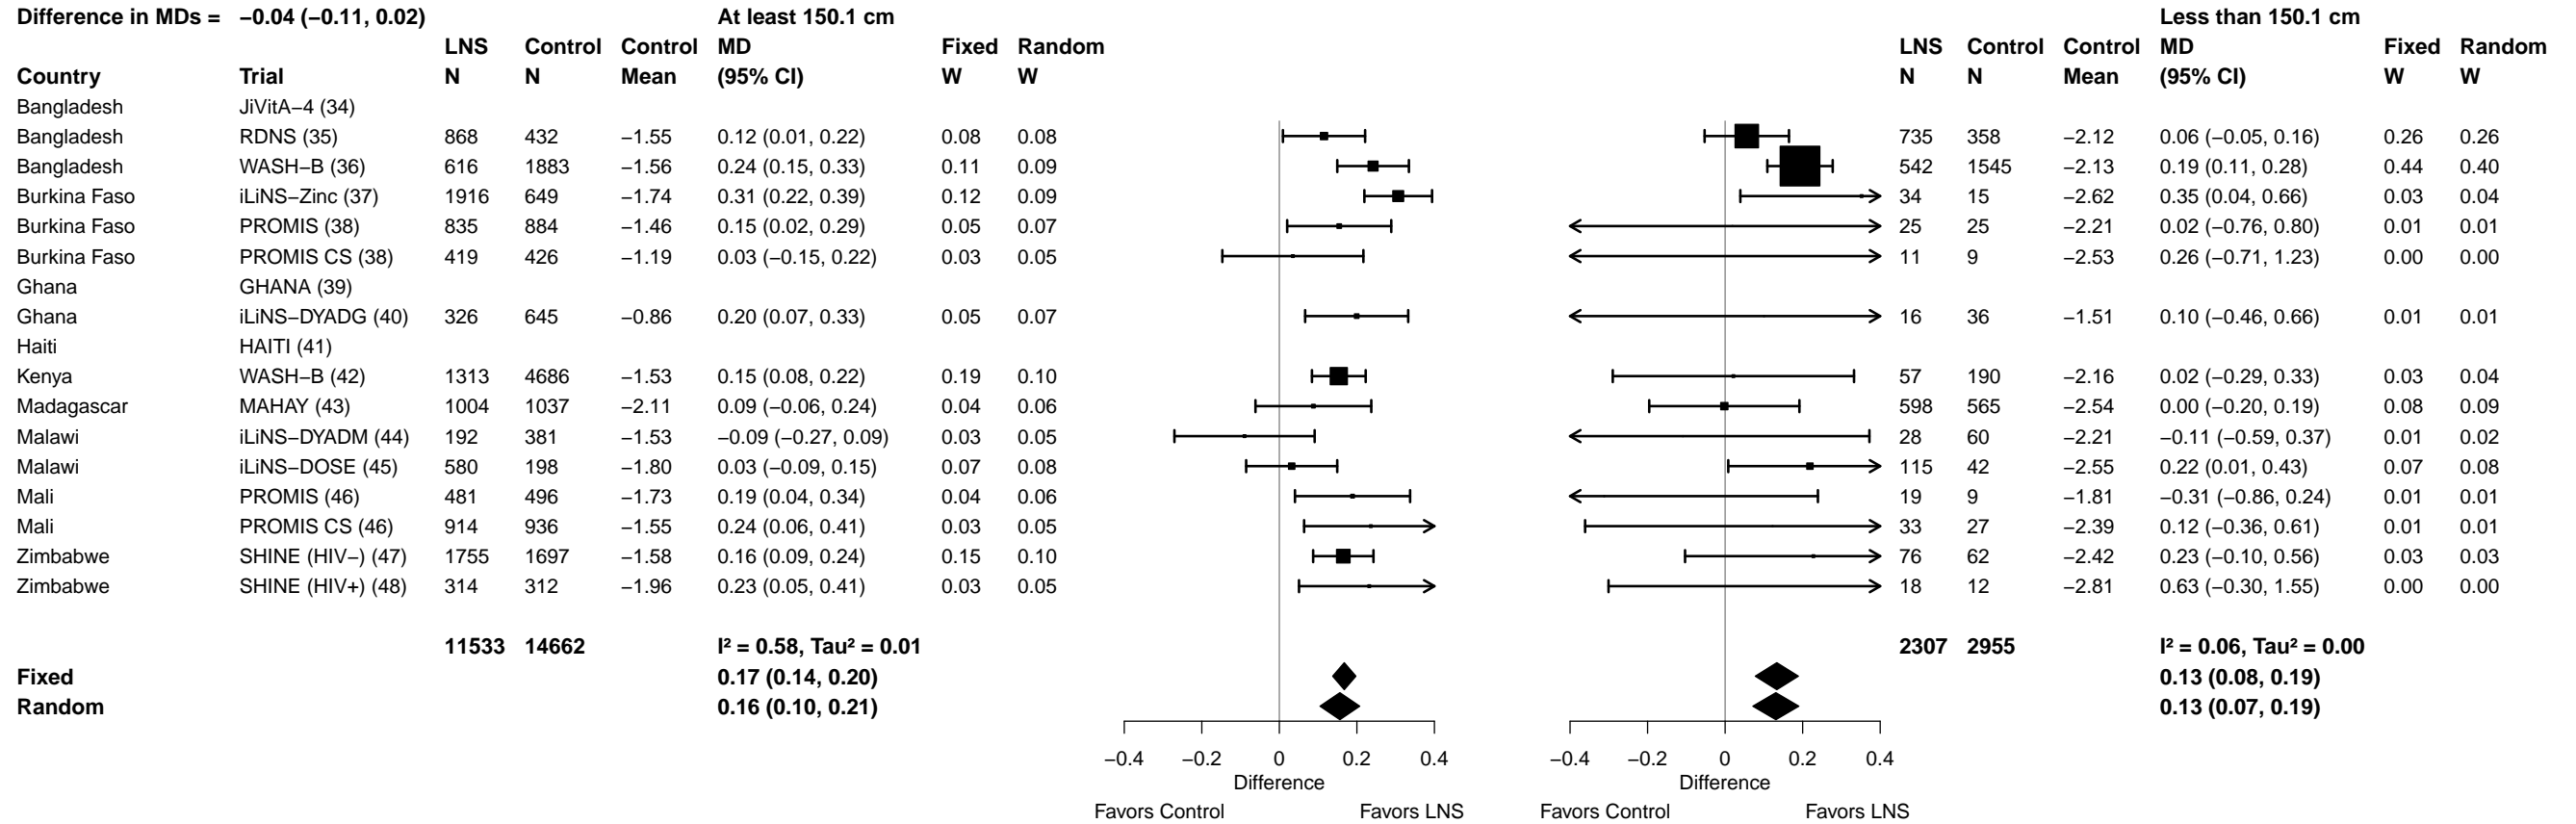

Supplemental figure 6A: Mean difference in LAZ

6A2: Stratified by Maternal BMI

P-for-interaction = 0.676

Difference in MDs = -0.01 (-0.06, 0.04)

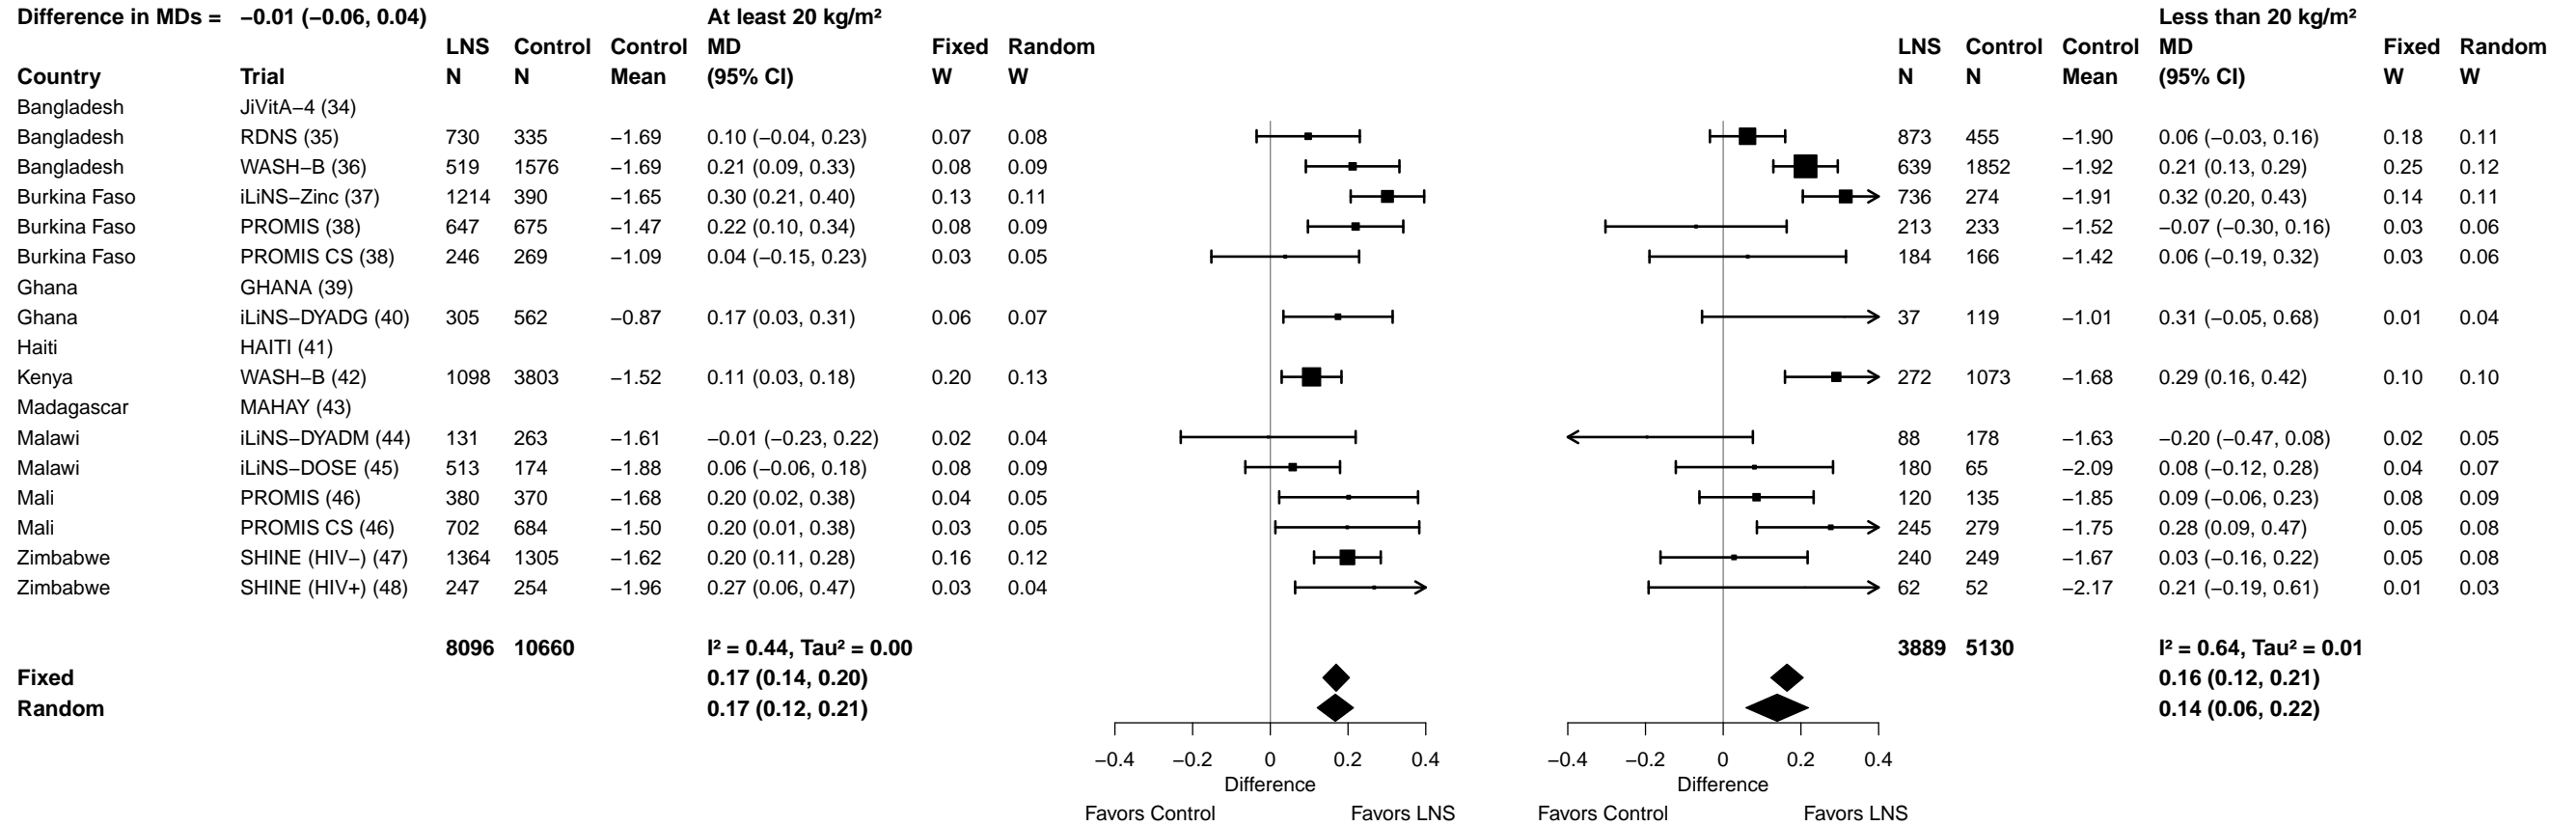

Supplemental figure 6A: Mean difference in LAZ

6A3: Stratified by Maternal age

P-for-interaction = 0.818

Difference in MDs = 0.00 (-0.05, 0.04)

| Country      | Trial             | LNS<br>N    | Control<br>N | Control<br>Mean | MD<br>(95% CI)                                      | Fixed<br>W | Random<br>W | At least 25 y |  |
|--------------|-------------------|-------------|--------------|-----------------|-----------------------------------------------------|------------|-------------|---------------|--|
|              |                   |             |              |                 |                                                     |            |             |               |  |
| Bangladesh   | JiVitA-4 (34)     | 1218        | 546          | -1.94           | 0.10 (0.03, 0.16)                                   | 0.21       | 0.12        |               |  |
| Bangladesh   | RDNS (35)         | 453         | 221          | -1.80           | 0.19 (0.03, 0.35)                                   | 0.04       | 0.05        |               |  |
| Bangladesh   | WASH-B (36)       | 492         | 1512         | -1.83           | 0.17 (0.09, 0.26)                                   | 0.12       | 0.10        |               |  |
| Burkina Faso | iLiNS-Zinc (37)   | 1131        | 399          | -1.72           | 0.33 (0.22, 0.45)                                   | 0.07       | 0.08        |               |  |
| Burkina Faso | PROMIS (38)       | 485         | 526          | -1.47           | 0.15 (-0.01, 0.32)                                  | 0.04       | 0.05        |               |  |
| Burkina Faso | PROMIS CS (38)    | 202         | 192          | -1.17           | 0.05 (-0.17, 0.27)                                  | 0.02       | 0.03        |               |  |
| Ghana        | GHANA (39)        | 69          | 63           | -0.30           | 0.28 (-0.08, 0.65)                                  | 0.01       | 0.01        |               |  |
| Ghana        | iLiNS-DYADG (40)  | 220         | 416          | -0.84           | 0.11 (-0.05, 0.27)                                  | 0.04       | 0.05        |               |  |
| Haiti        | HAITI (41)        | 101         | 103          | -0.67           | 0.04 (-0.13, 0.21)                                  | 0.03       | 0.05        |               |  |
| Kenya        | WASH-B (42)       | 844         | 2811         | -1.50           | 0.13 (0.05, 0.21)                                   | 0.16       | 0.11        |               |  |
| Madagascar   | MAHAY (43)        | 896         | 949          | -2.26           | 0.03 (-0.13, 0.18)                                  | 0.04       | 0.05        |               |  |
| Malawi       | iLiNS-DYADM (44)  | 106         | 226          | -1.65           | -0.04 (-0.30, 0.21)                                 | 0.02       | 0.03        |               |  |
| Malawi       | iLiNS-DOSE (45)   | 368         | 134          | -1.88           | 0.00 (-0.14, 0.14)                                  | 0.05       | 0.06        |               |  |
| Mali         | PROMIS (46)       | 346         | 359          | -1.72           | 0.17 (0.02, 0.33)                                   | 0.04       | 0.05        |               |  |
| Mali         | PROMIS CS (46)    | 503         | 507          | -1.47           | 0.16 (-0.04, 0.36)                                  | 0.02       | 0.04        |               |  |
| Zimbabwe     | SHINE (HIV-) (47) | 875         | 800          | -1.55           | 0.20 (0.08, 0.31)                                   | 0.07       | 0.08        |               |  |
| Zimbabwe     | SHINE (HIV+) (48) | 244         | 231          | -1.97           | 0.24 (0.04, 0.45)                                   | 0.02       | 0.04        |               |  |
|              |                   | <b>8553</b> | <b>9995</b>  |                 | <b>I<sup>2</sup> = 0.38, Tau<sup>2</sup> = 0.00</b> |            |             |               |  |
|              |                   |             |              |                 | <b>0.14 (0.11, 0.17)</b>                            |            |             |               |  |
|              |                   |             |              |                 | <b>0.14 (0.10, 0.18)</b>                            |            |             |               |  |

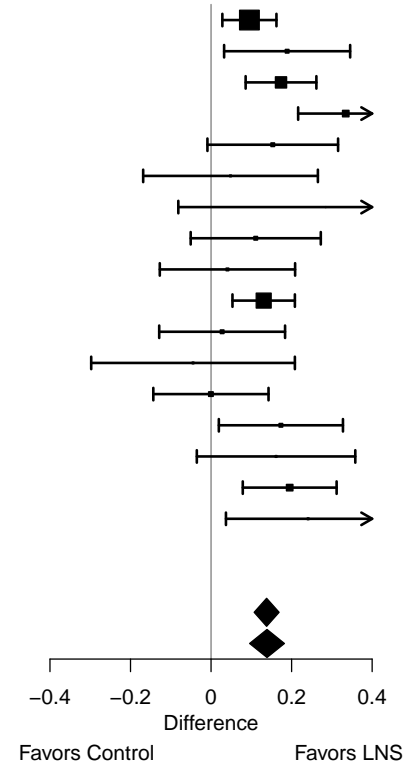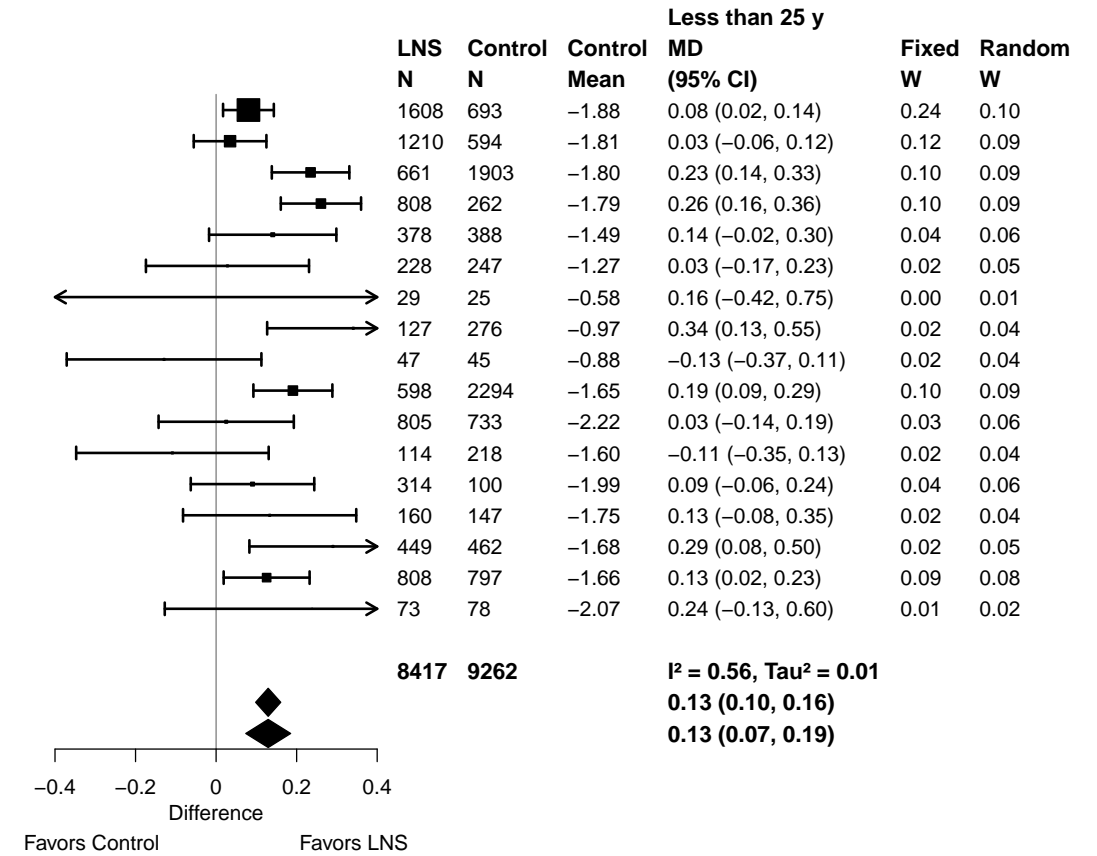



Supplemental figure 6A: Mean difference in LAZ

6A4: Stratified by Maternal education

P-for-interaction = 0.699

Difference in MDs = 0.01 (-0.04, 0.06)

| Country       | Trial             | LNS<br>N    | Control<br>N | Control<br>Mean | Primary or greater<br>MD<br>(95% CI)                | Fixed<br>W | Random<br>W | Fixed |   | Random |   |
|---------------|-------------------|-------------|--------------|-----------------|-----------------------------------------------------|------------|-------------|-------|---|--------|---|
|               |                   |             |              |                 |                                                     |            |             | W     | W | W      | W |
| Bangladesh    | JiVitA-4 (34)     | 1830        | 756          | -1.78           | 0.08 (0.02, 0.14)                                   | 0.27       | 0.15        |       |   |        |   |
| Bangladesh    | RDNS (35)         | 1245        | 589          | -1.77           | 0.10 (0.01, 0.19)                                   | 0.11       | 0.11        |       |   |        |   |
| Bangladesh    | WASH-B (36)       | 813         | 2452         | -1.72           | 0.24 (0.16, 0.32)                                   | 0.14       | 0.12        |       |   |        |   |
| Burkina Faso  | iLiNS-Zinc (37)   | 82          | 16           | -1.47           | 0.41 (0.11, 0.71)                                   | 0.01       | 0.02        |       |   |        |   |
| Burkina Faso  | PROMIS (38)       | 70          | 54           | -1.39           | -0.08 (-0.38, 0.23)                                 | 0.01       | 0.02        |       |   |        |   |
| Burkina Faso  | PROMIS CS (38)    | 34          | 39           | -1.26           | 0.00 (-0.49, 0.49)                                  | 0.00       | 0.01        |       |   |        |   |
| Ghana         | GHANA (39)        | 91          | 75           | -0.36           | 0.28 (-0.05, 0.62)                                  | 0.01       | 0.02        |       |   |        |   |
| Ghana         | iLiNS-DYADG (40)  | 267         | 548          | -0.89           | 0.18 (0.03, 0.32)                                   | 0.04       | 0.07        |       |   |        |   |
| Haiti         | HAITI (41)        | 130         | 126          | -0.71           | -0.04 (-0.19, 0.11)                                 | 0.04       | 0.07        |       |   |        |   |
| Kenya         | WASH-B (42)       | 700         | 2434         | -1.39           | 0.09 (0.00, 0.18)                                   | 0.11       | 0.11        |       |   |        |   |
| Madagascar    | MAHAY (43)        | 351         | 431          | -2.17           | 0.03 (-0.17, 0.23)                                  | 0.02       | 0.04        |       |   |        |   |
| Malawi        | iLiNS-DYADM (44)  | 35          | 69           | -1.37           | -0.10 (-0.51, 0.32)                                 | 0.01       | 0.01        |       |   |        |   |
| Malawi        | iLiNS-DOSE (45)   | 162         | 56           | -1.73           | 0.12 (-0.08, 0.32)                                  | 0.02       | 0.04        |       |   |        |   |
| Mali          | PROMIS (46)       | 41          | 37           | -1.25           | 0.10 (-0.29, 0.49)                                  | 0.01       | 0.01        |       |   |        |   |
| Mali          | PROMIS CS (46)    | 107         | 96           | -1.42           | 0.29 (-0.04, 0.63)                                  | 0.01       | 0.02        |       |   |        |   |
| Zimbabwe      | SHINE (HIV-) (47) | 1717        | 1644         | -1.59           | 0.15 (0.07, 0.23)                                   | 0.14       | 0.12        |       |   |        |   |
| Zimbabwe      | SHINE (HIV+) (48) | 301         | 293          | -1.96           | 0.21 (0.03, 0.40)                                   | 0.03       | 0.05        |       |   |        |   |
|               |                   | <b>7976</b> | <b>9715</b>  |                 |                                                     |            |             |       |   |        |   |
|               |                   |             |              |                 | <b>I<sup>2</sup> = 0.40, Tau<sup>2</sup> = 0.00</b> |            |             |       |   |        |   |
| <b>Fixed</b>  |                   |             |              |                 | <b>0.12 (0.09, 0.15)</b>                            |            |             |       |   |        |   |
| <b>Random</b> |                   |             |              |                 | <b>0.12 (0.08, 0.17)</b>                            |            |             |       |   |        |   |

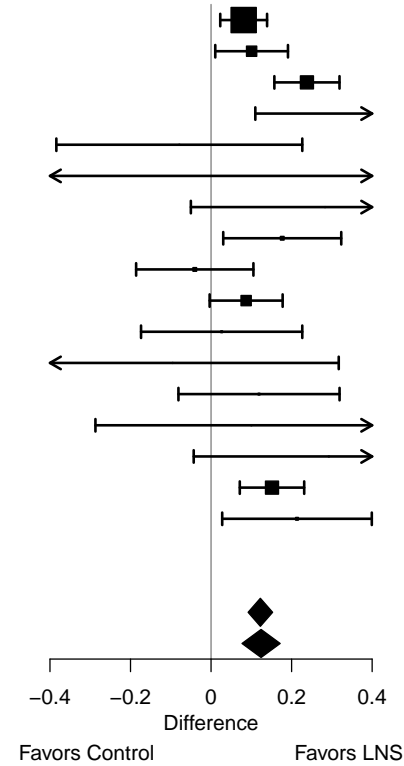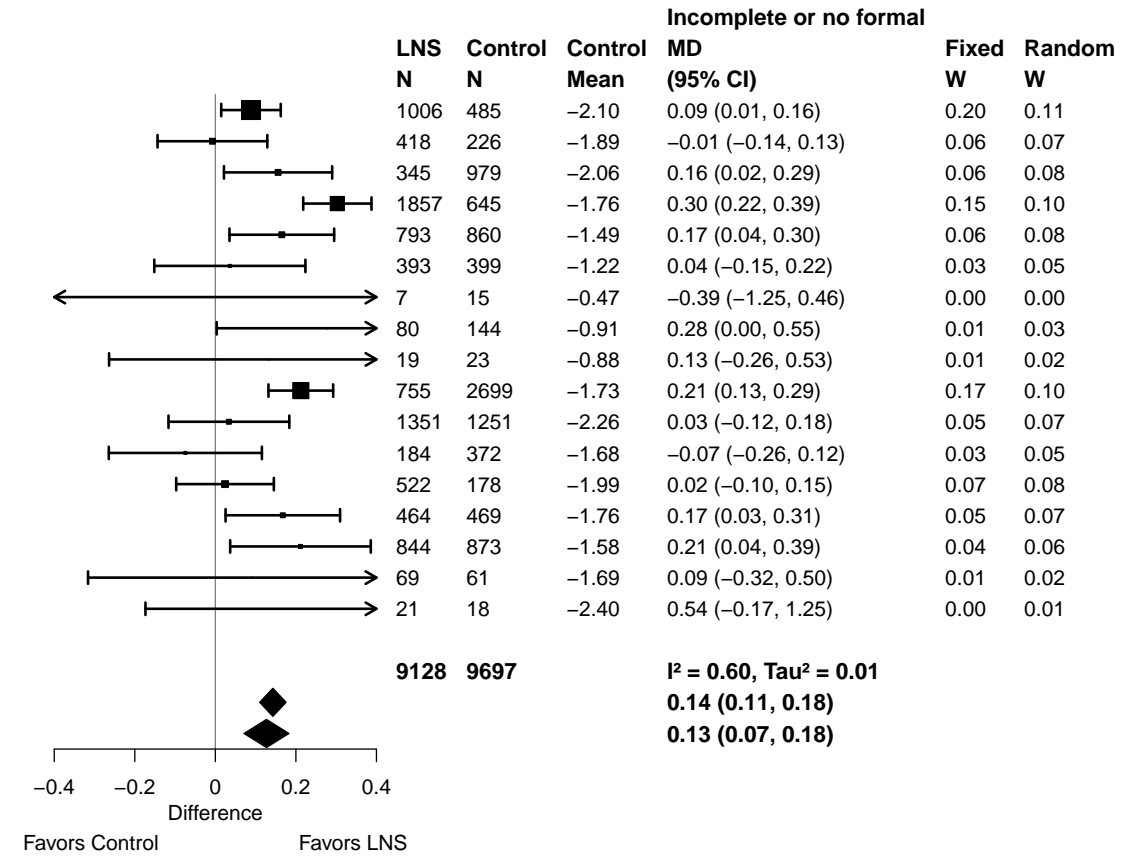

Supplemental figure 6A: Mean difference in LAZ

6A5: Stratified by Maternal depressive symptoms

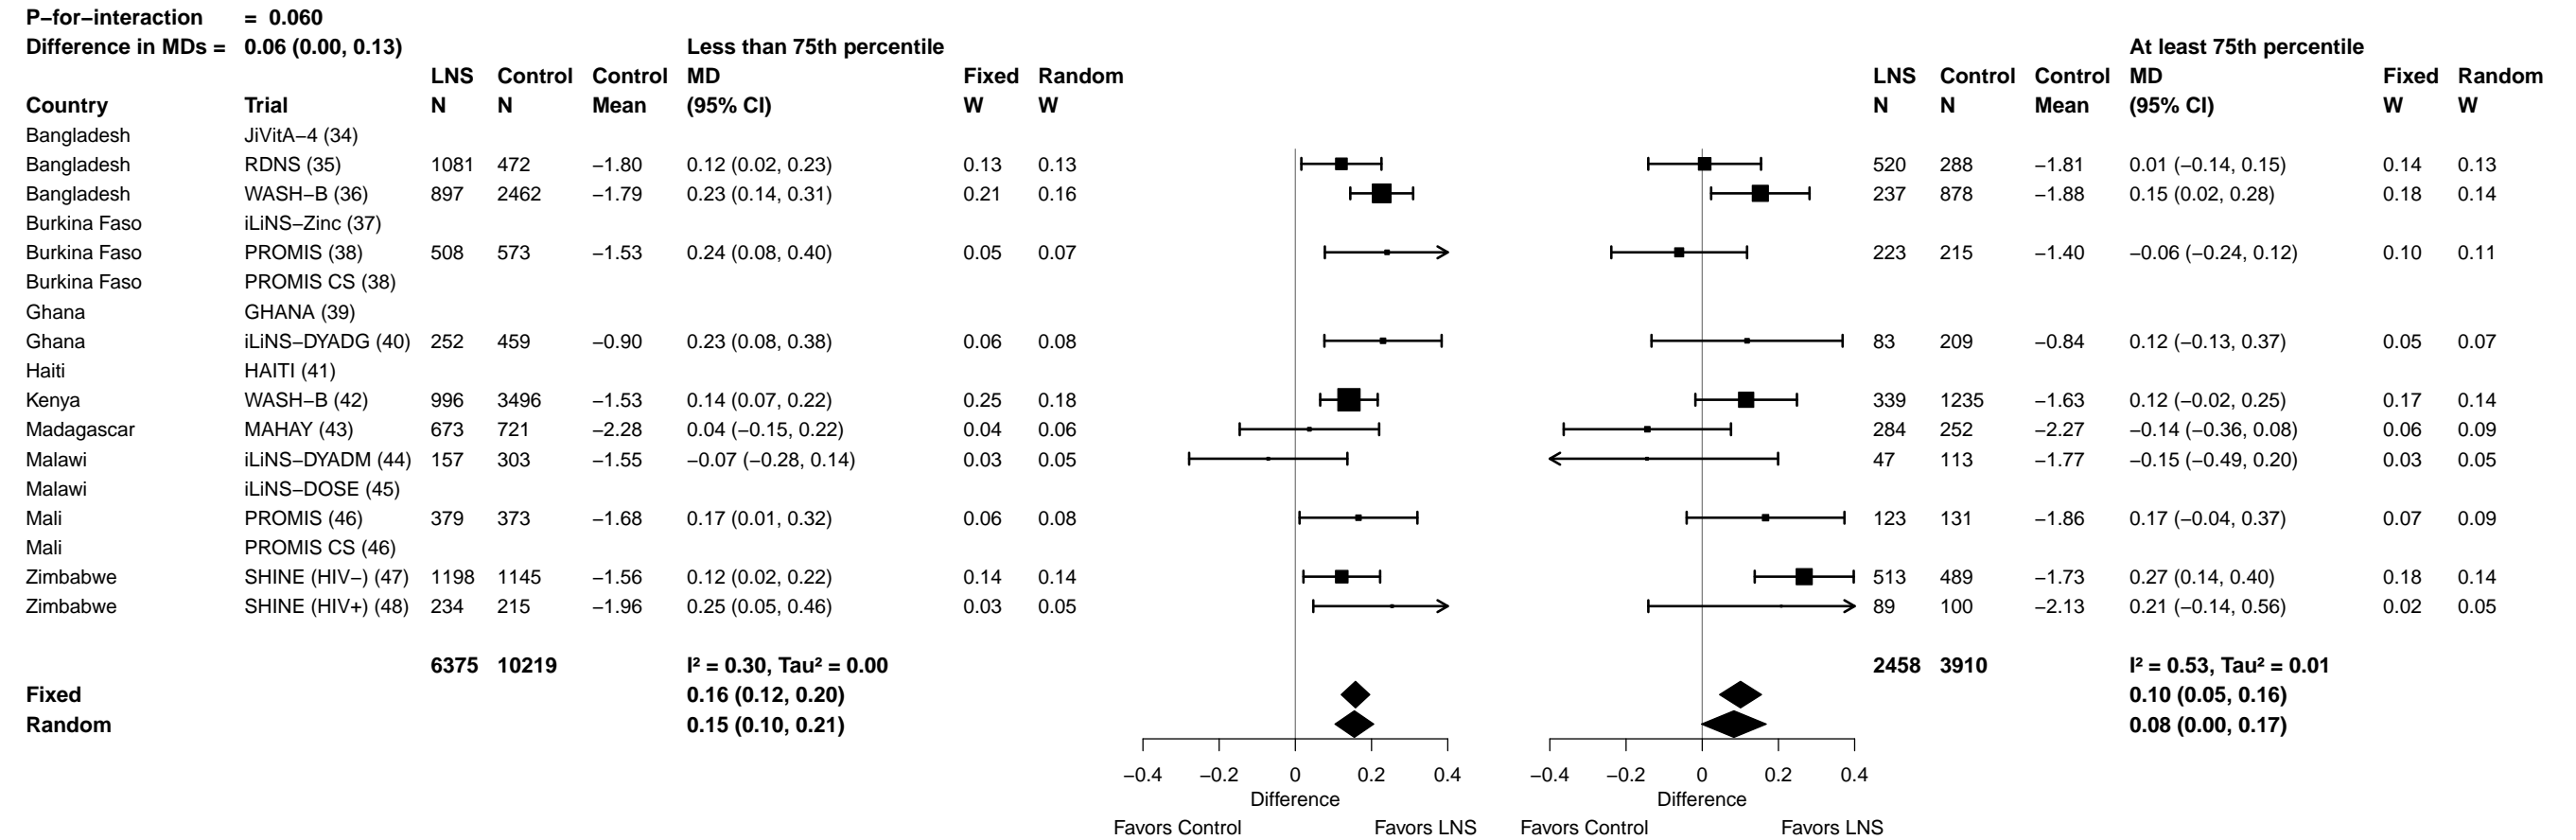

Supplemental figure 6A: Mean difference in LAZ

6A6: Stratified by Child sex

P-for-interaction = 0.170

Difference in MDs = 0.03 (-0.01, 0.07)

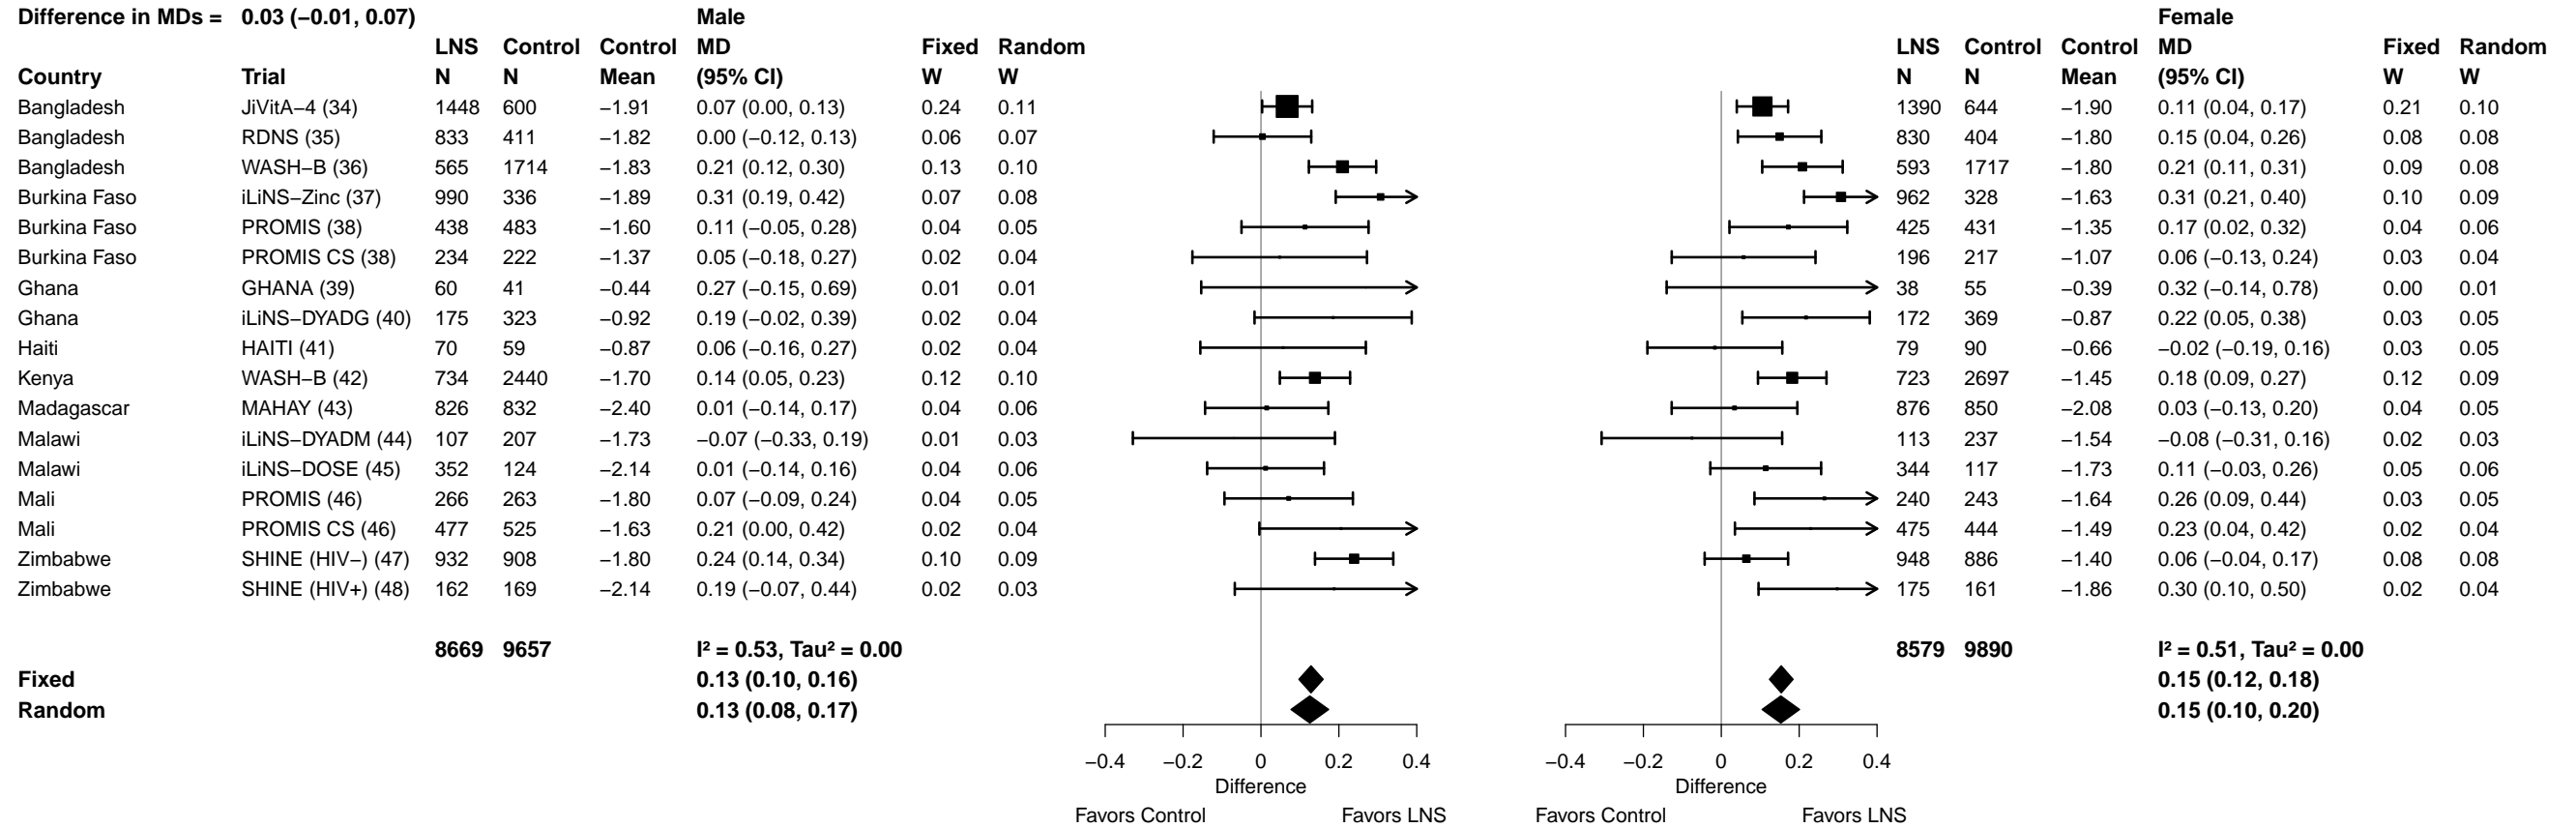

Supplemental figure 6A: Mean difference in LAZ

6A7: Stratified by Child birth order

P-for-interaction = 0.134

Difference in MDs = -0.03 (-0.08, 0.01)

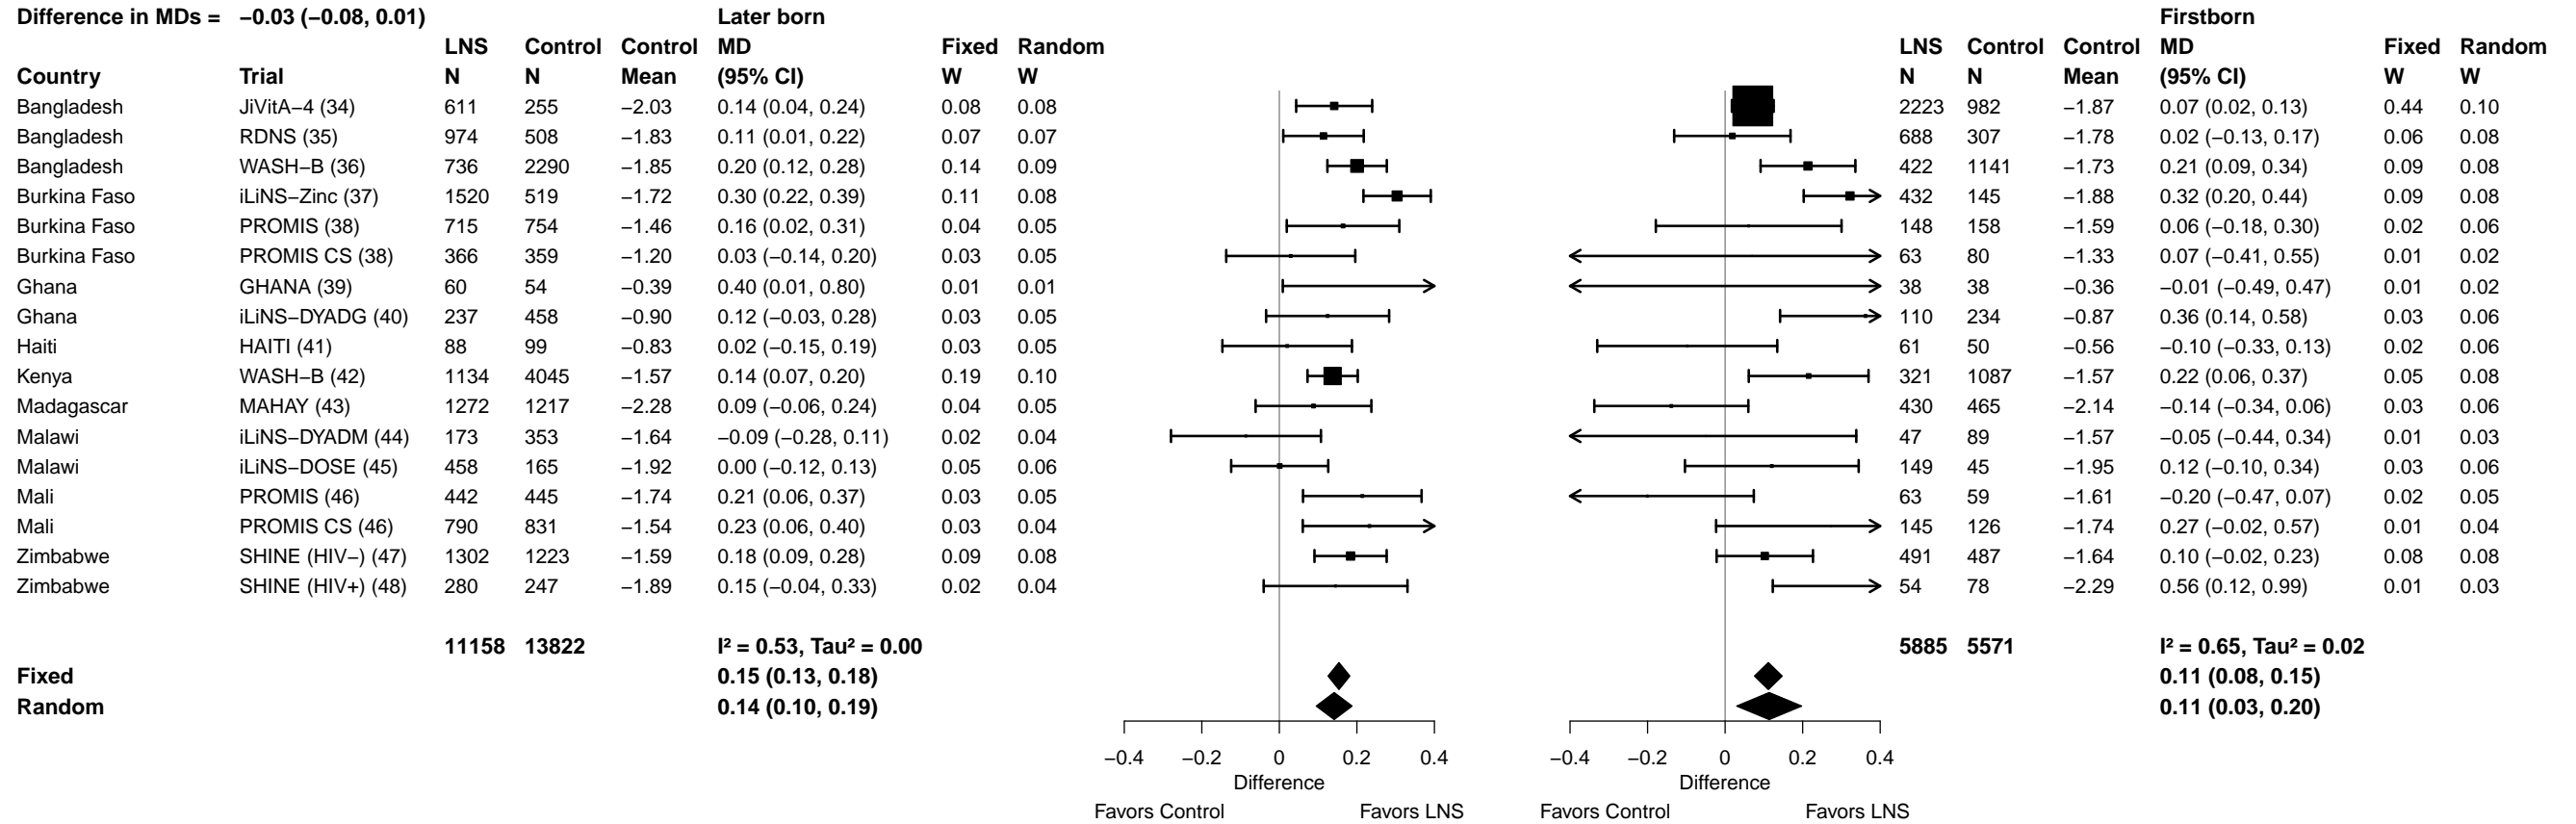

Supplemental figure 6A: Mean difference in LAZ

6A8: Stratified by Child baseline anthropometric status

P-for-interaction = 0.932

Difference in MDs = 0.00 (-0.06, 0.05)

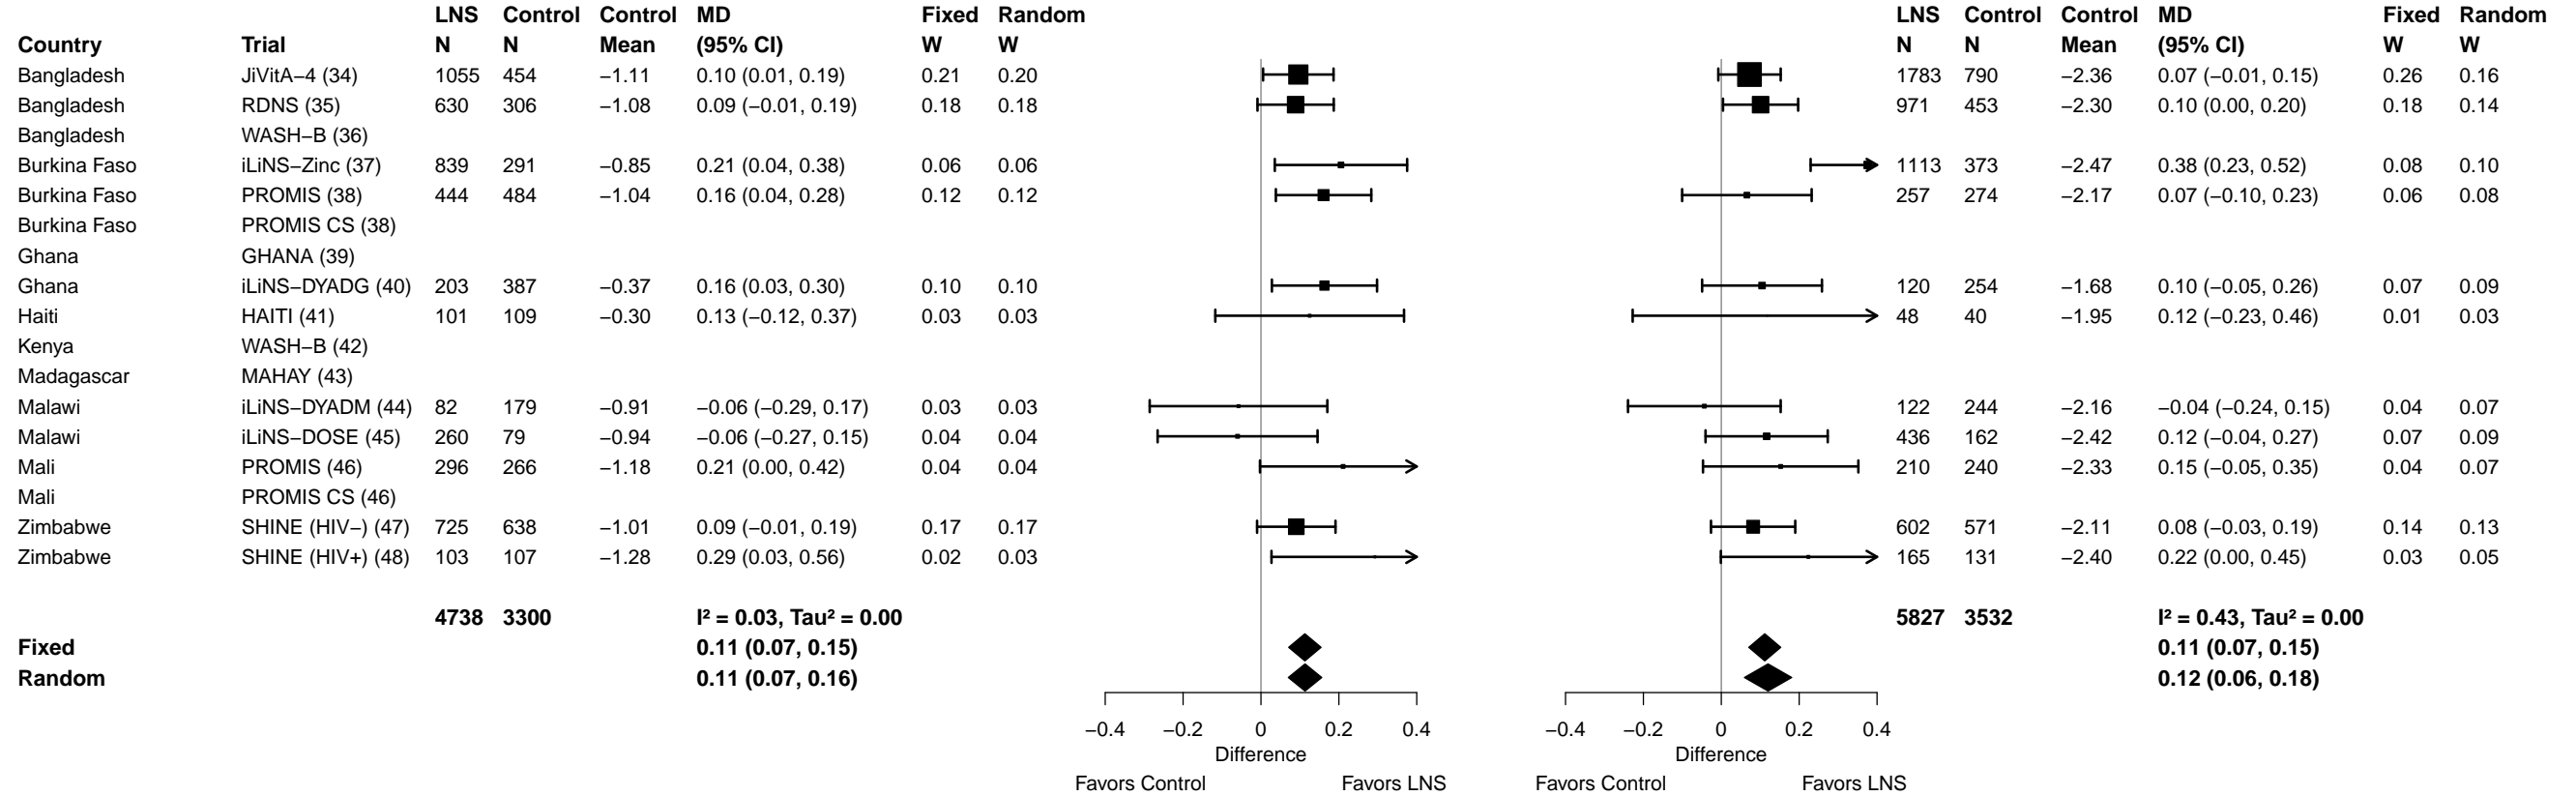

### Supplemental figure 6B: Stunting prevalence ratio

#### 6B1: Stratified by Maternal height

**P-for-interaction = 0.020**  
**Ratio of PRs = 1.09 (1.01, 1.18)**

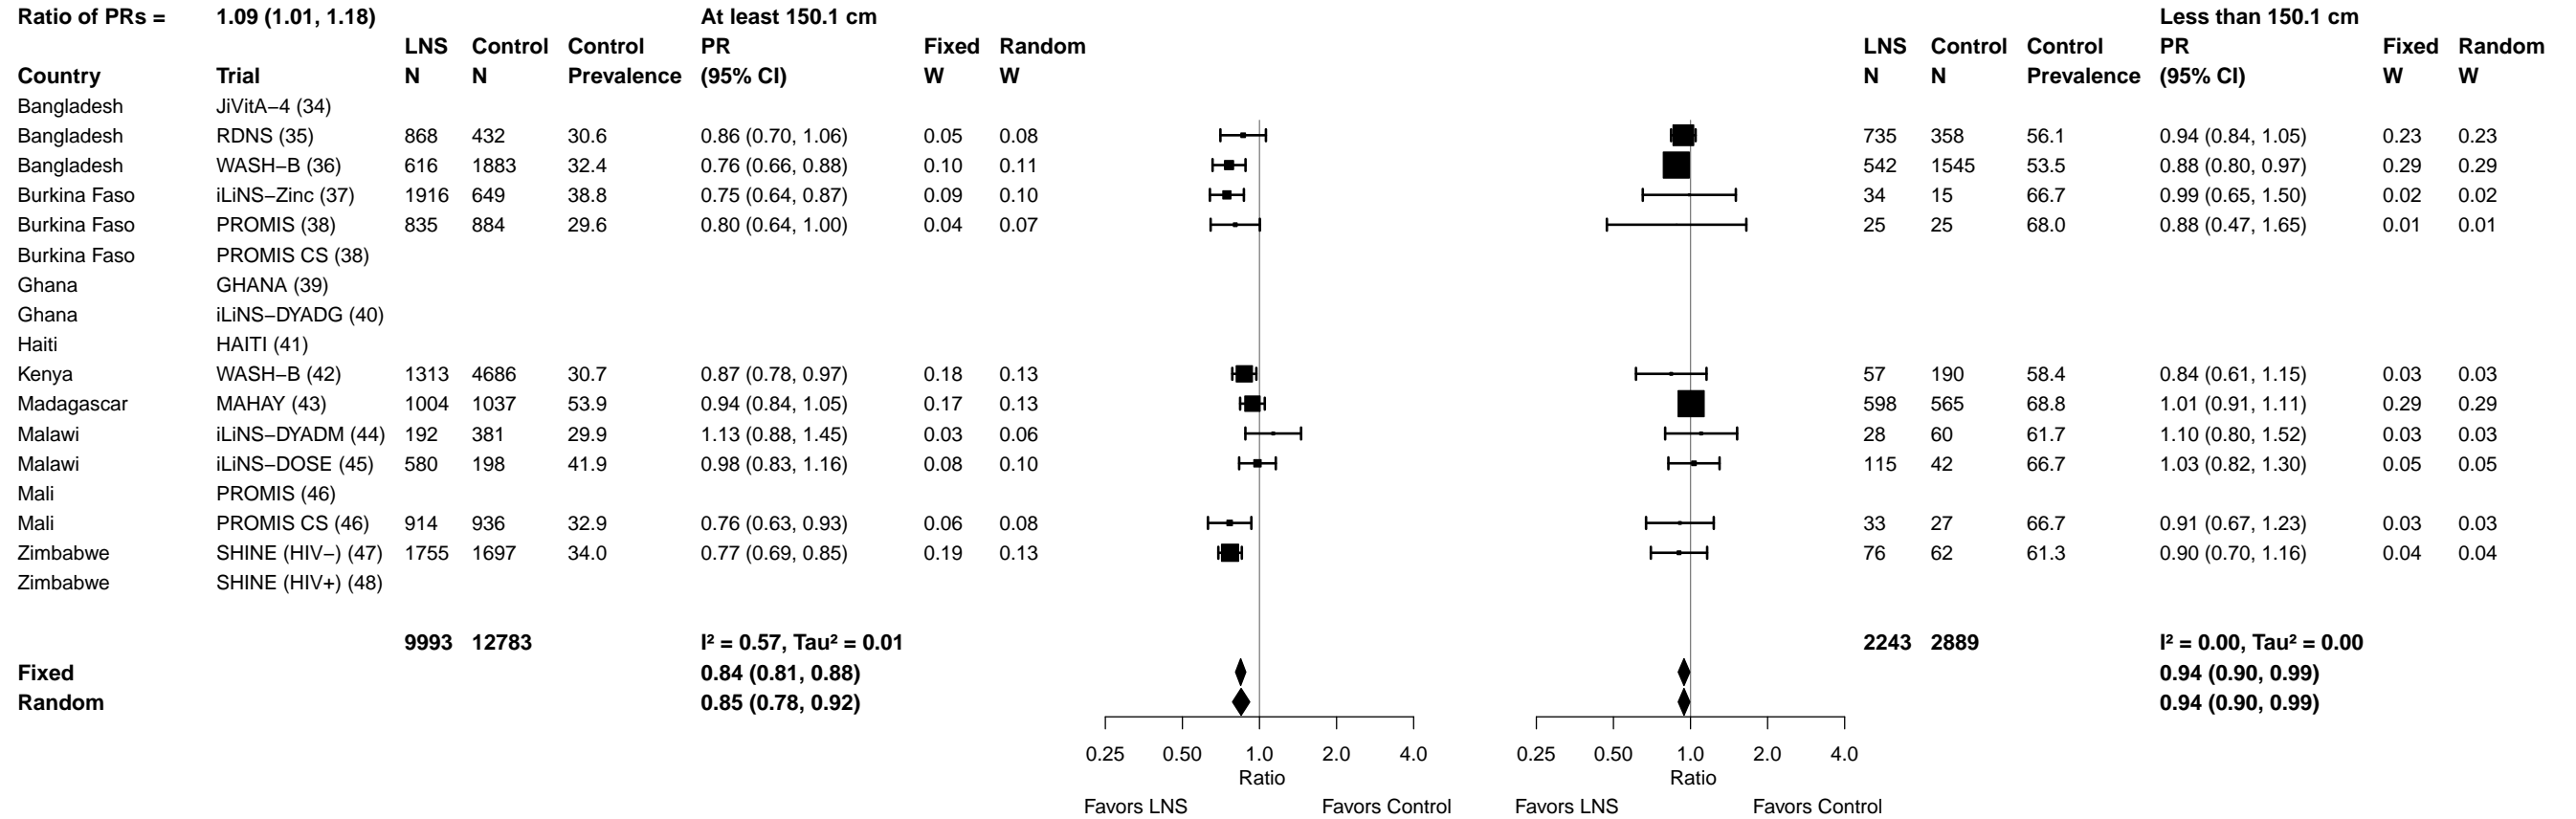

Supplemental figure 6B: Stunting prevalence ratio

6B2: Stratified by Maternal BMI

P-for-interaction = 0.017

Ratio of PRs = 1.10 (1.02, 1.19)

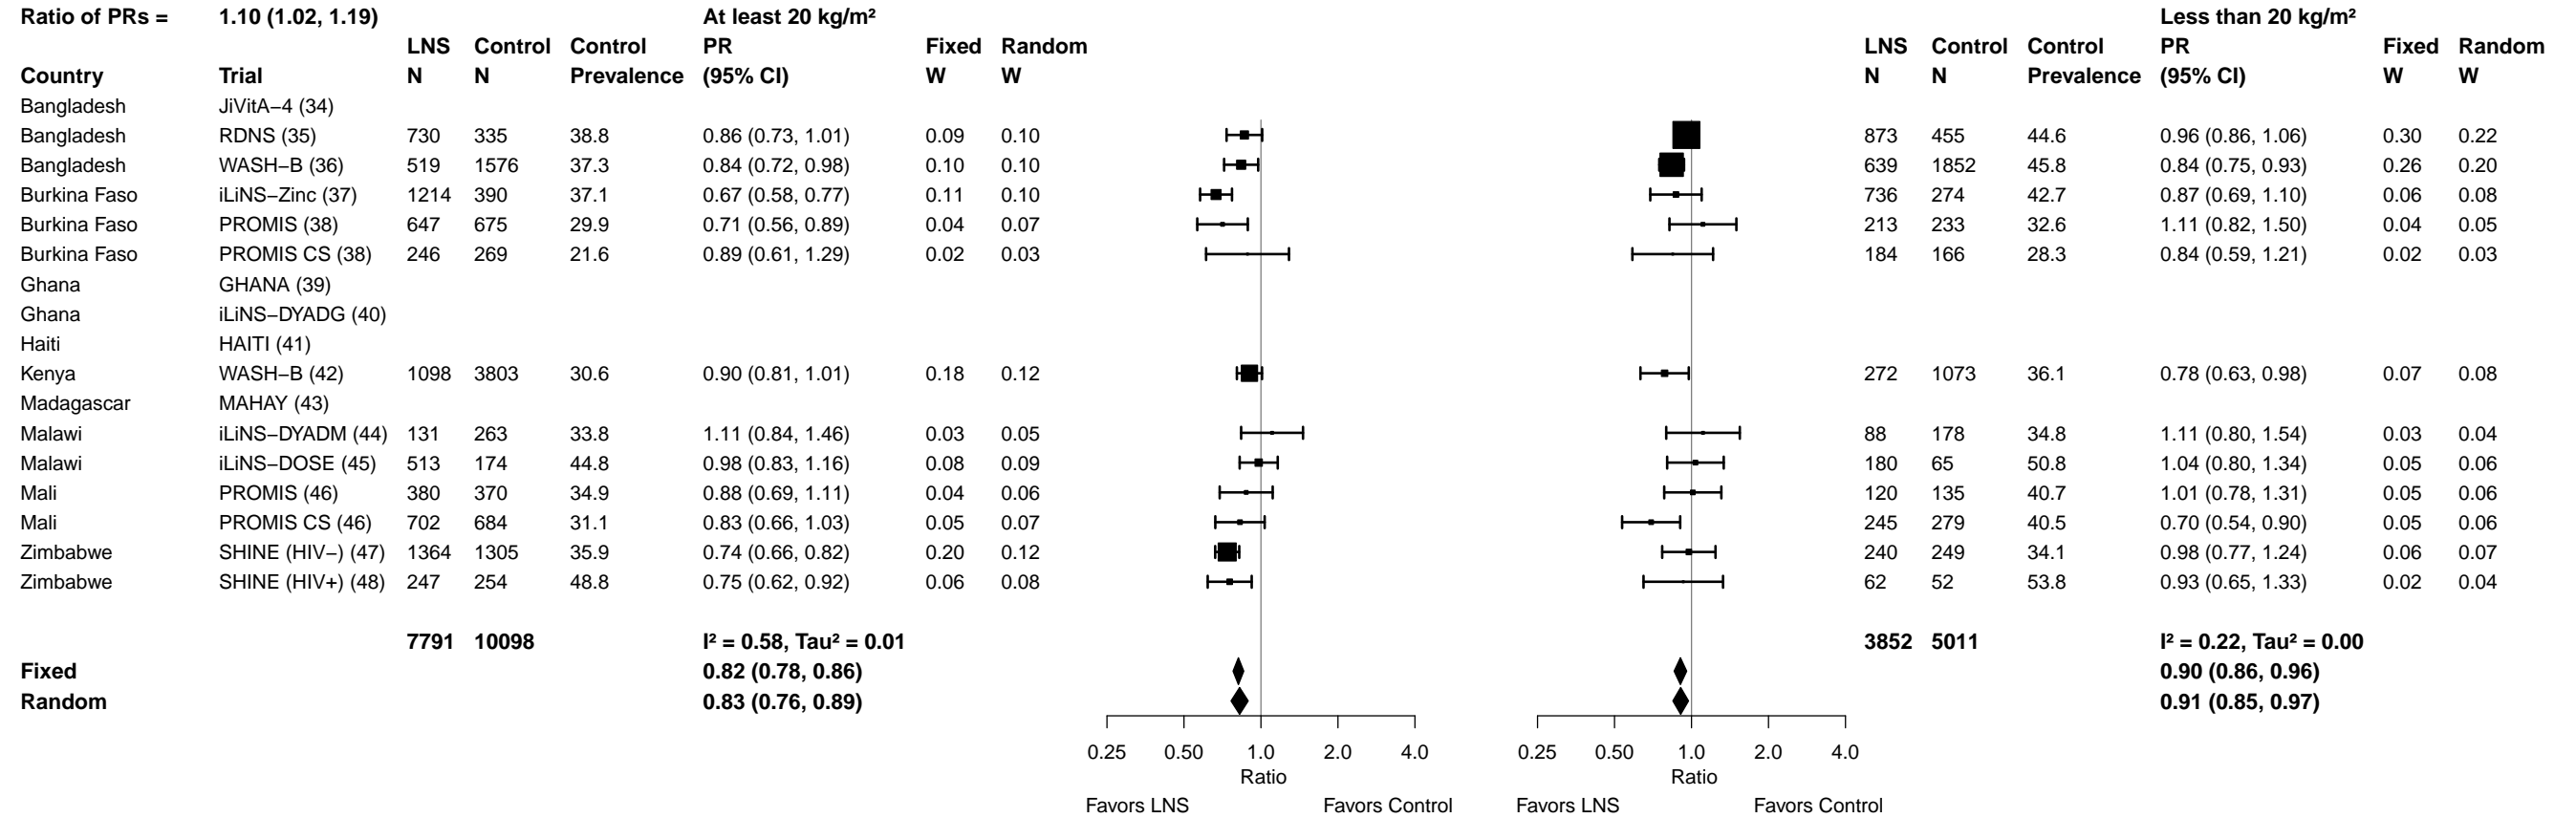

Supplemental figure 6B: Stunting prevalence ratio

6B3: Stratified by Maternal age

P-for-interaction = 0.192  
 Ratio of PRs = 1.04 (0.98, 1.10)

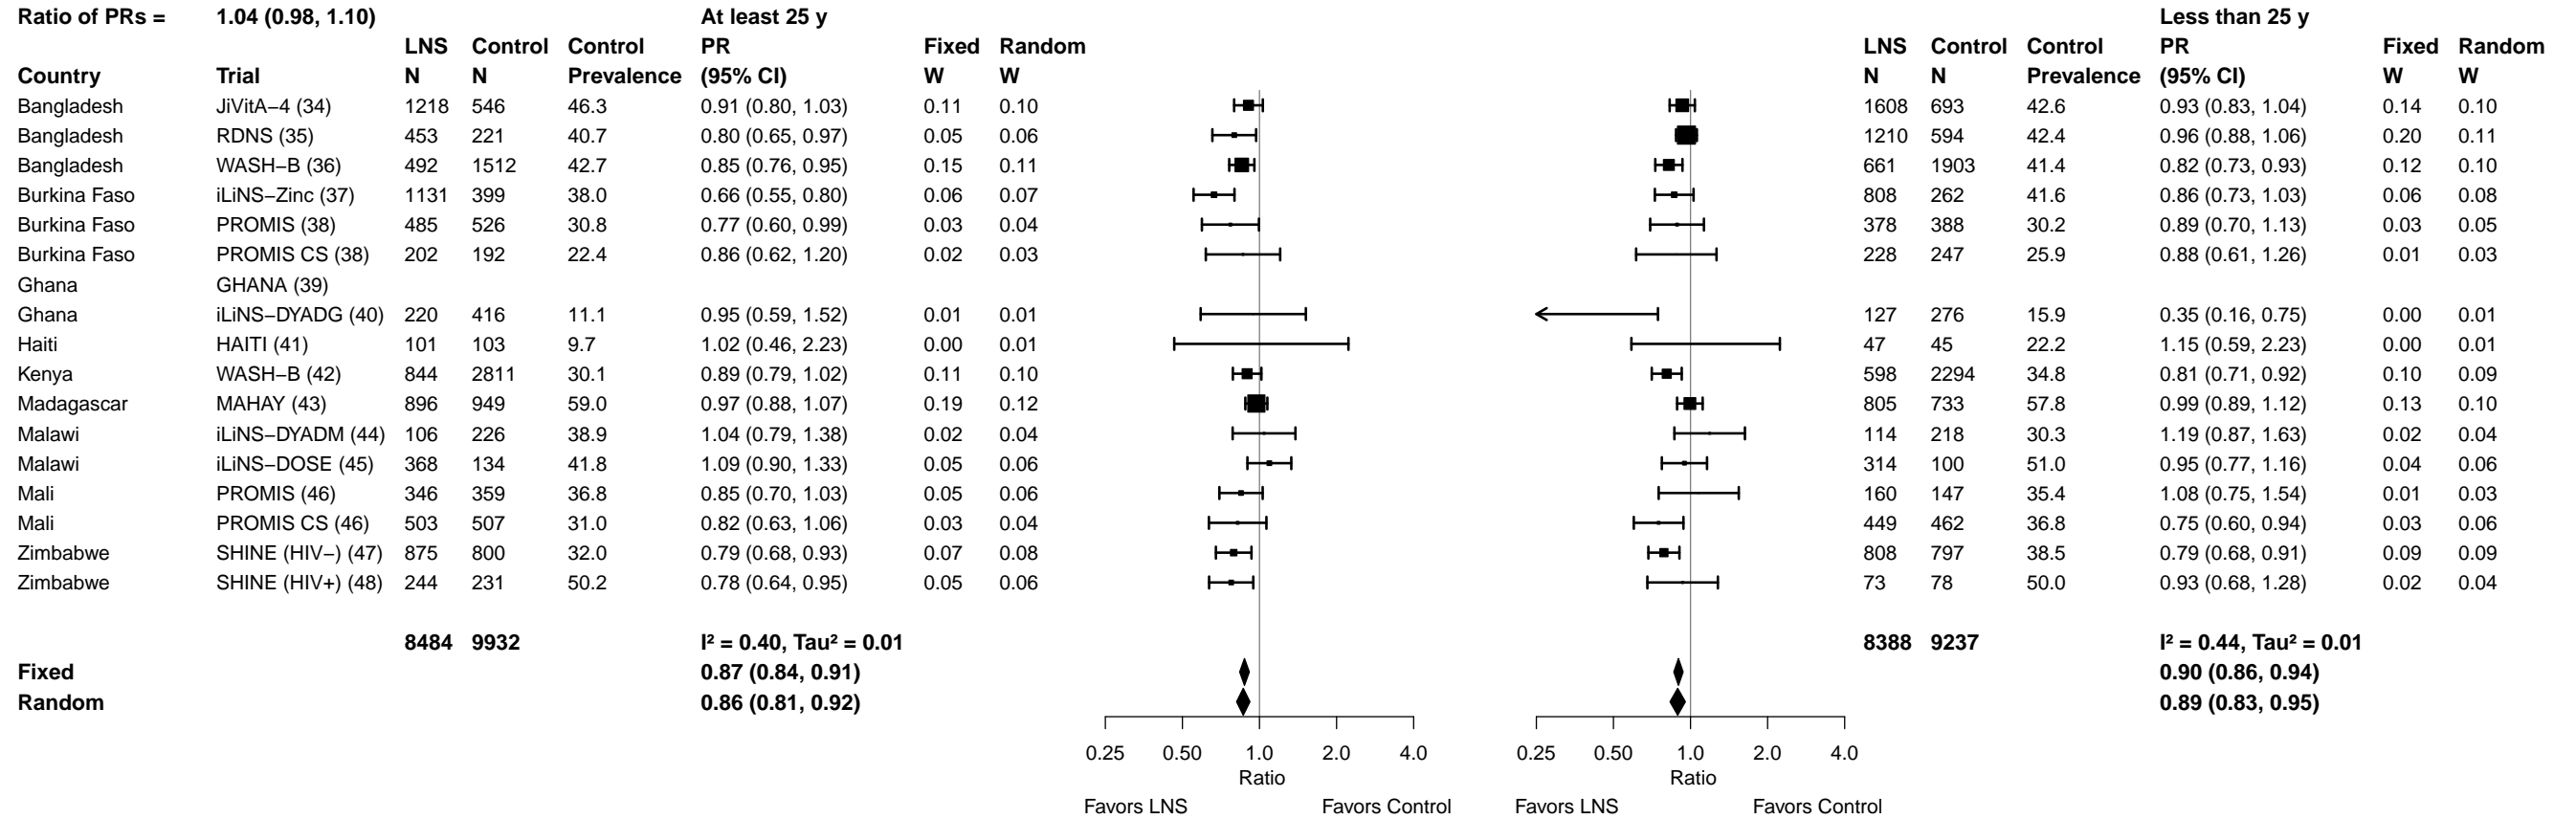



Supplemental figure 6B: Stunting prevalence ratio

6B4: Stratified by Maternal education

P-for-interaction = 0.042

Ratio of PRs = 1.07 (1.00, 1.15)

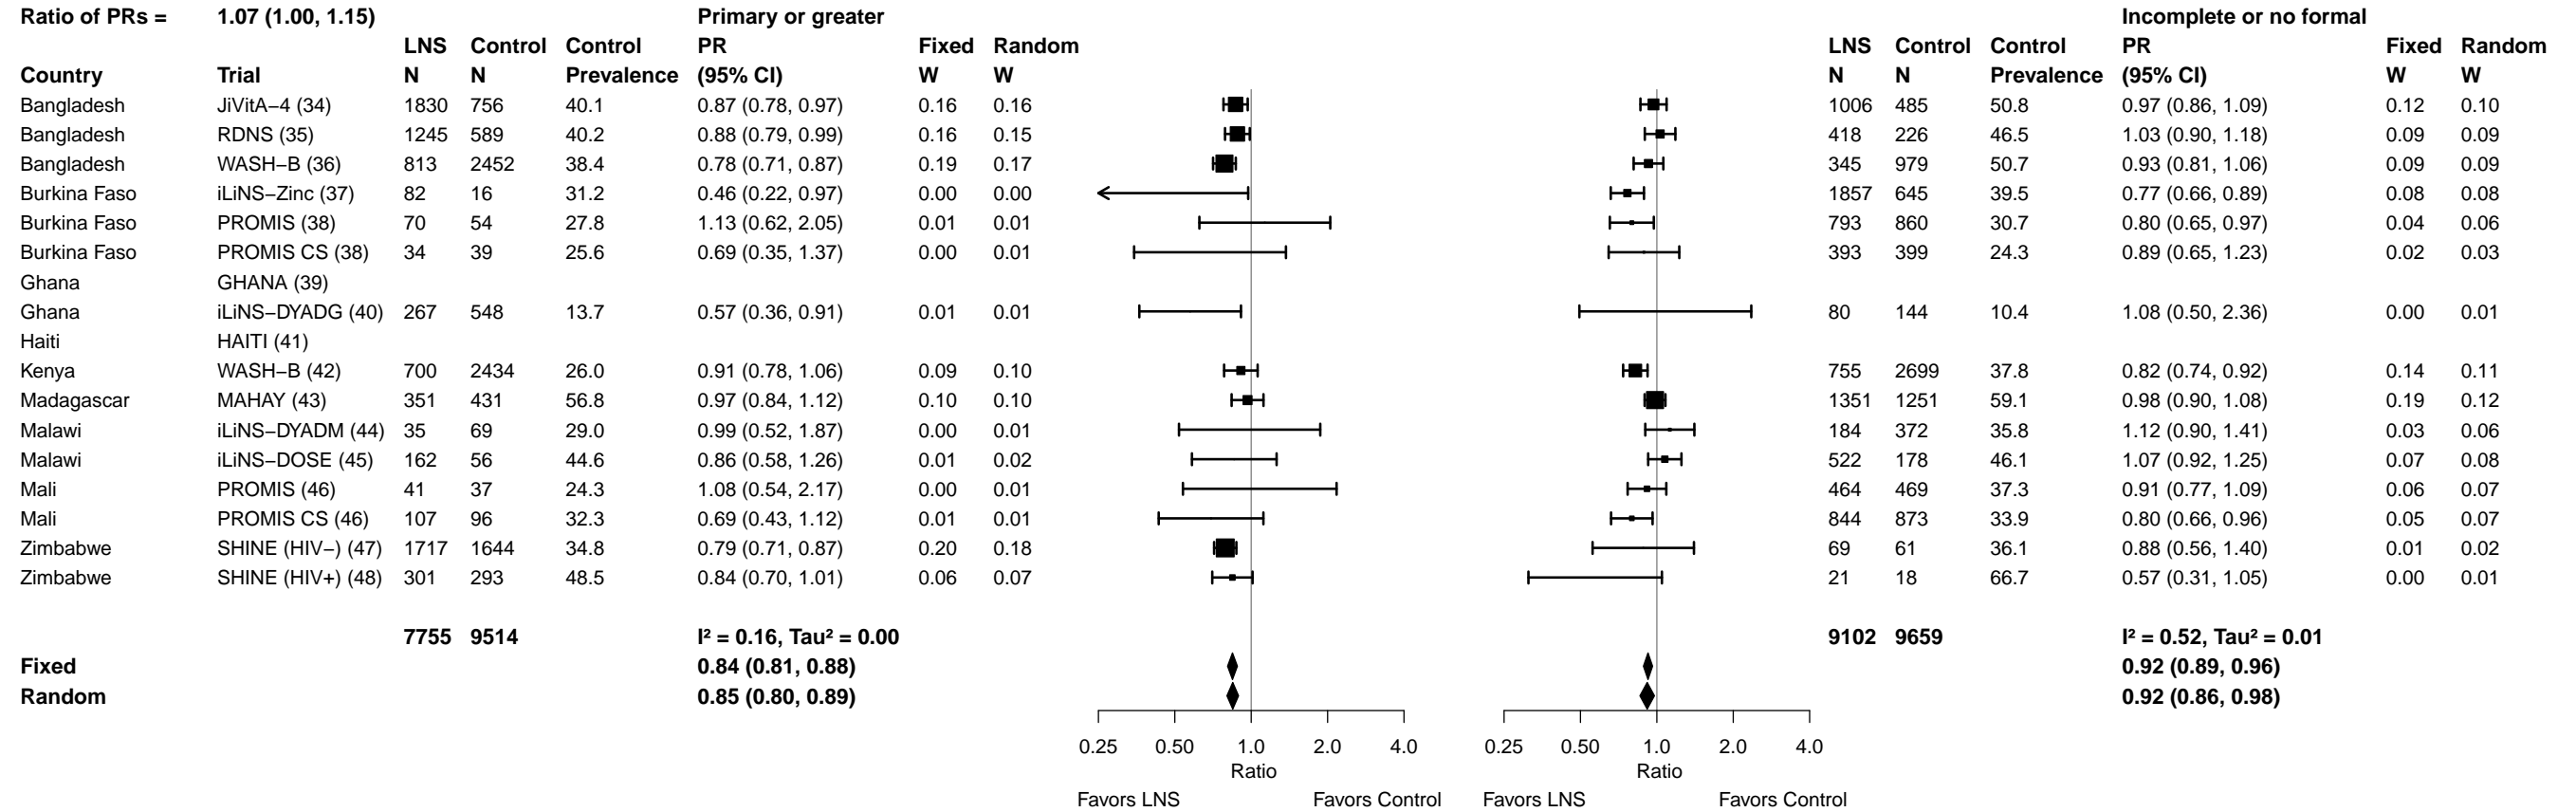

Supplemental figure 6B: Stunting prevalence ratio

6B5: Stratified by Maternal depressive symptoms

P-for-interaction = 0.003

Ratio of PRs = 0.89 (0.82, 0.96)

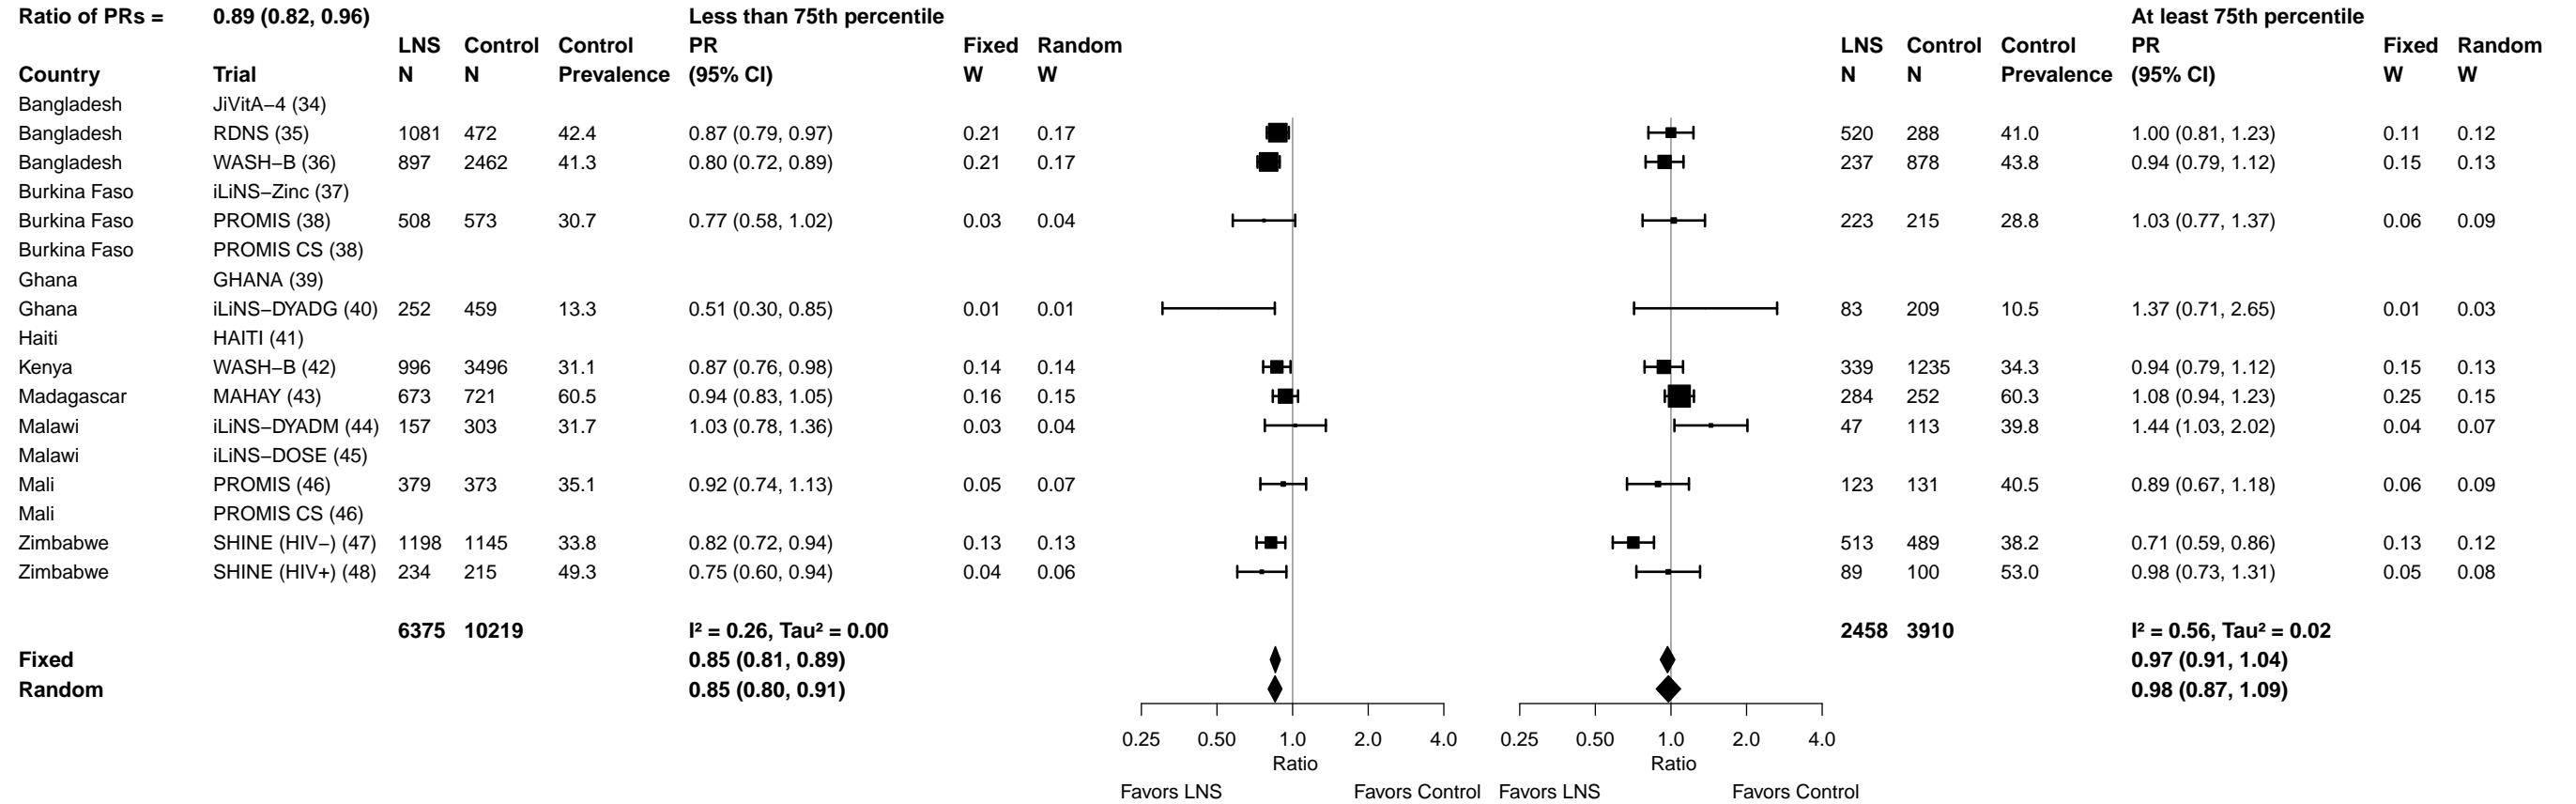

Supplemental figure 6B: Stunting prevalence ratio

6B6: Stratified by Child sex

P-for-interaction = 0.002  
 Ratio of PRs = 0.92 (0.87, 0.97)

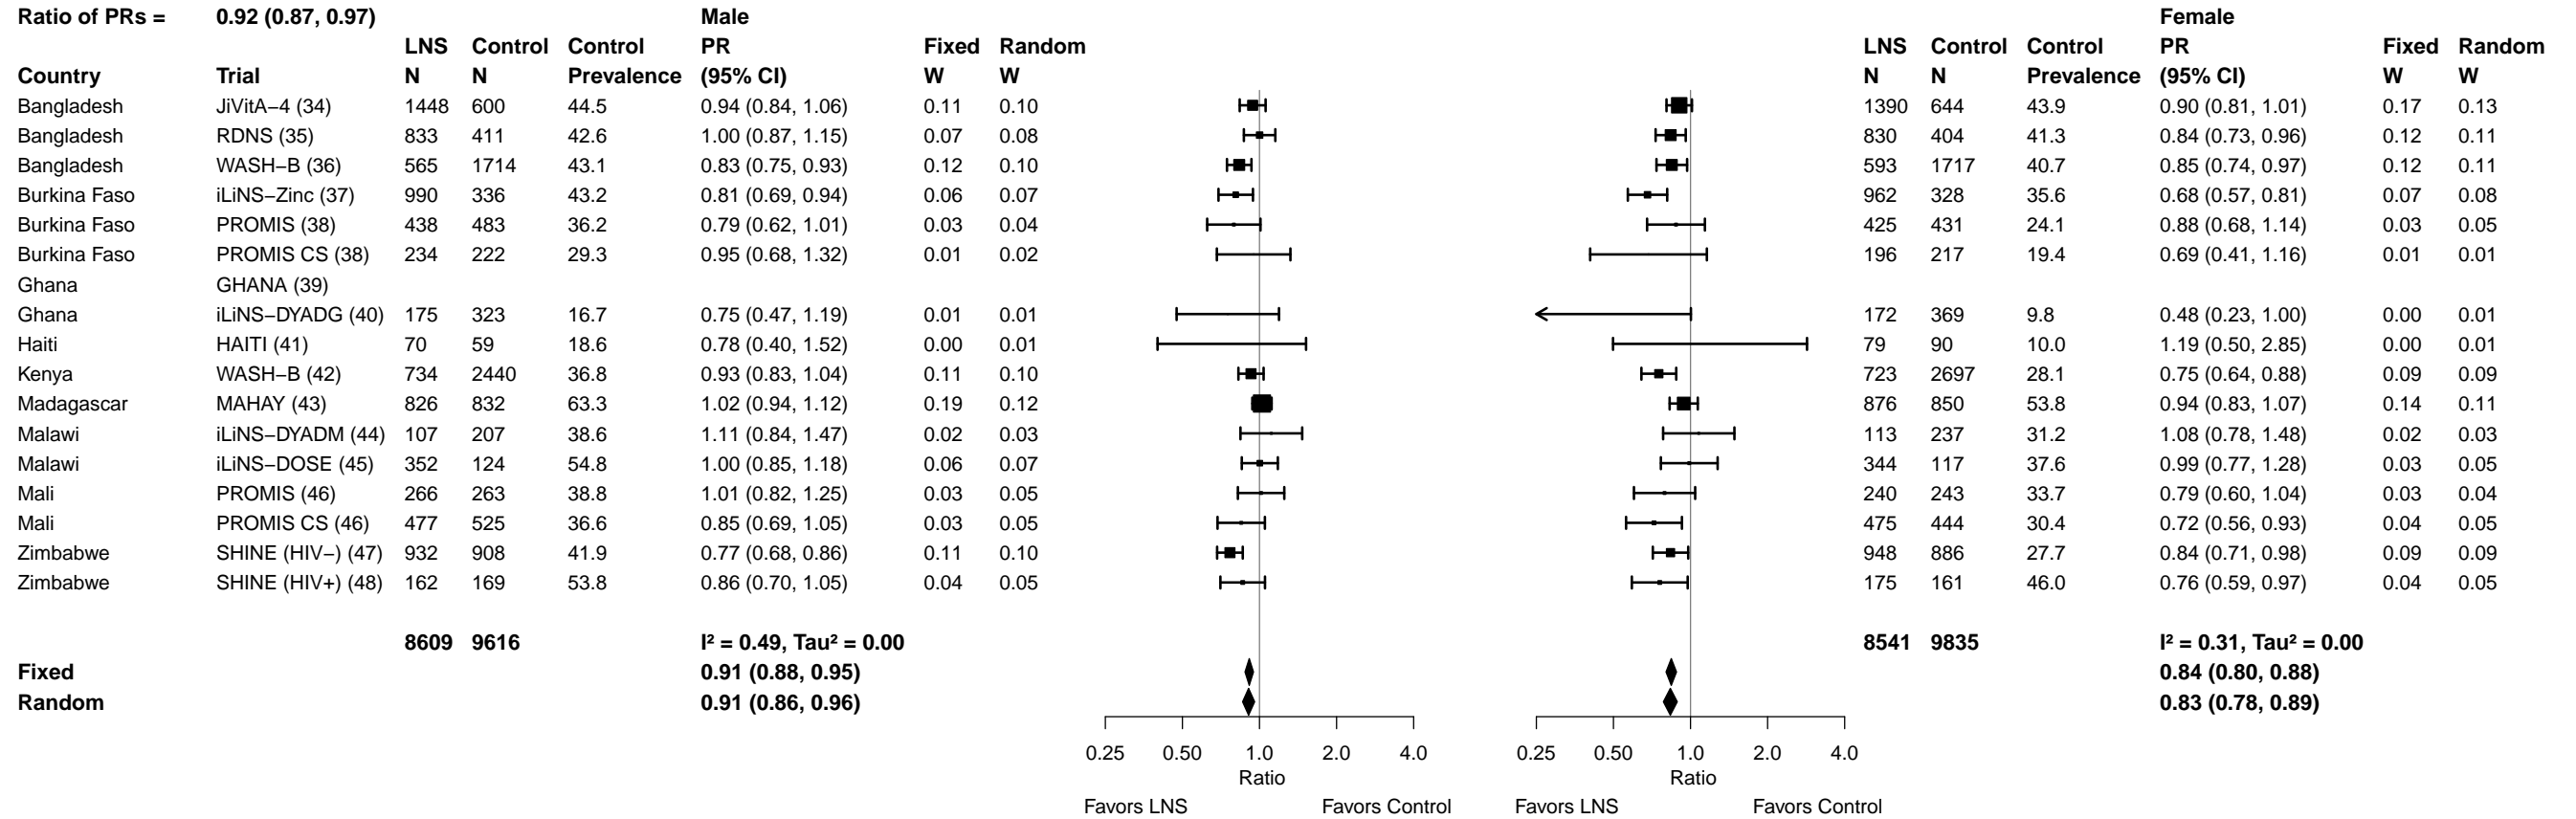

Supplemental figure 6B: Stunting prevalence ratio

6B7: Stratified by Child birth order

P-for-interaction = 0.054

Ratio of PRs = 1.06 (1.00, 1.13)

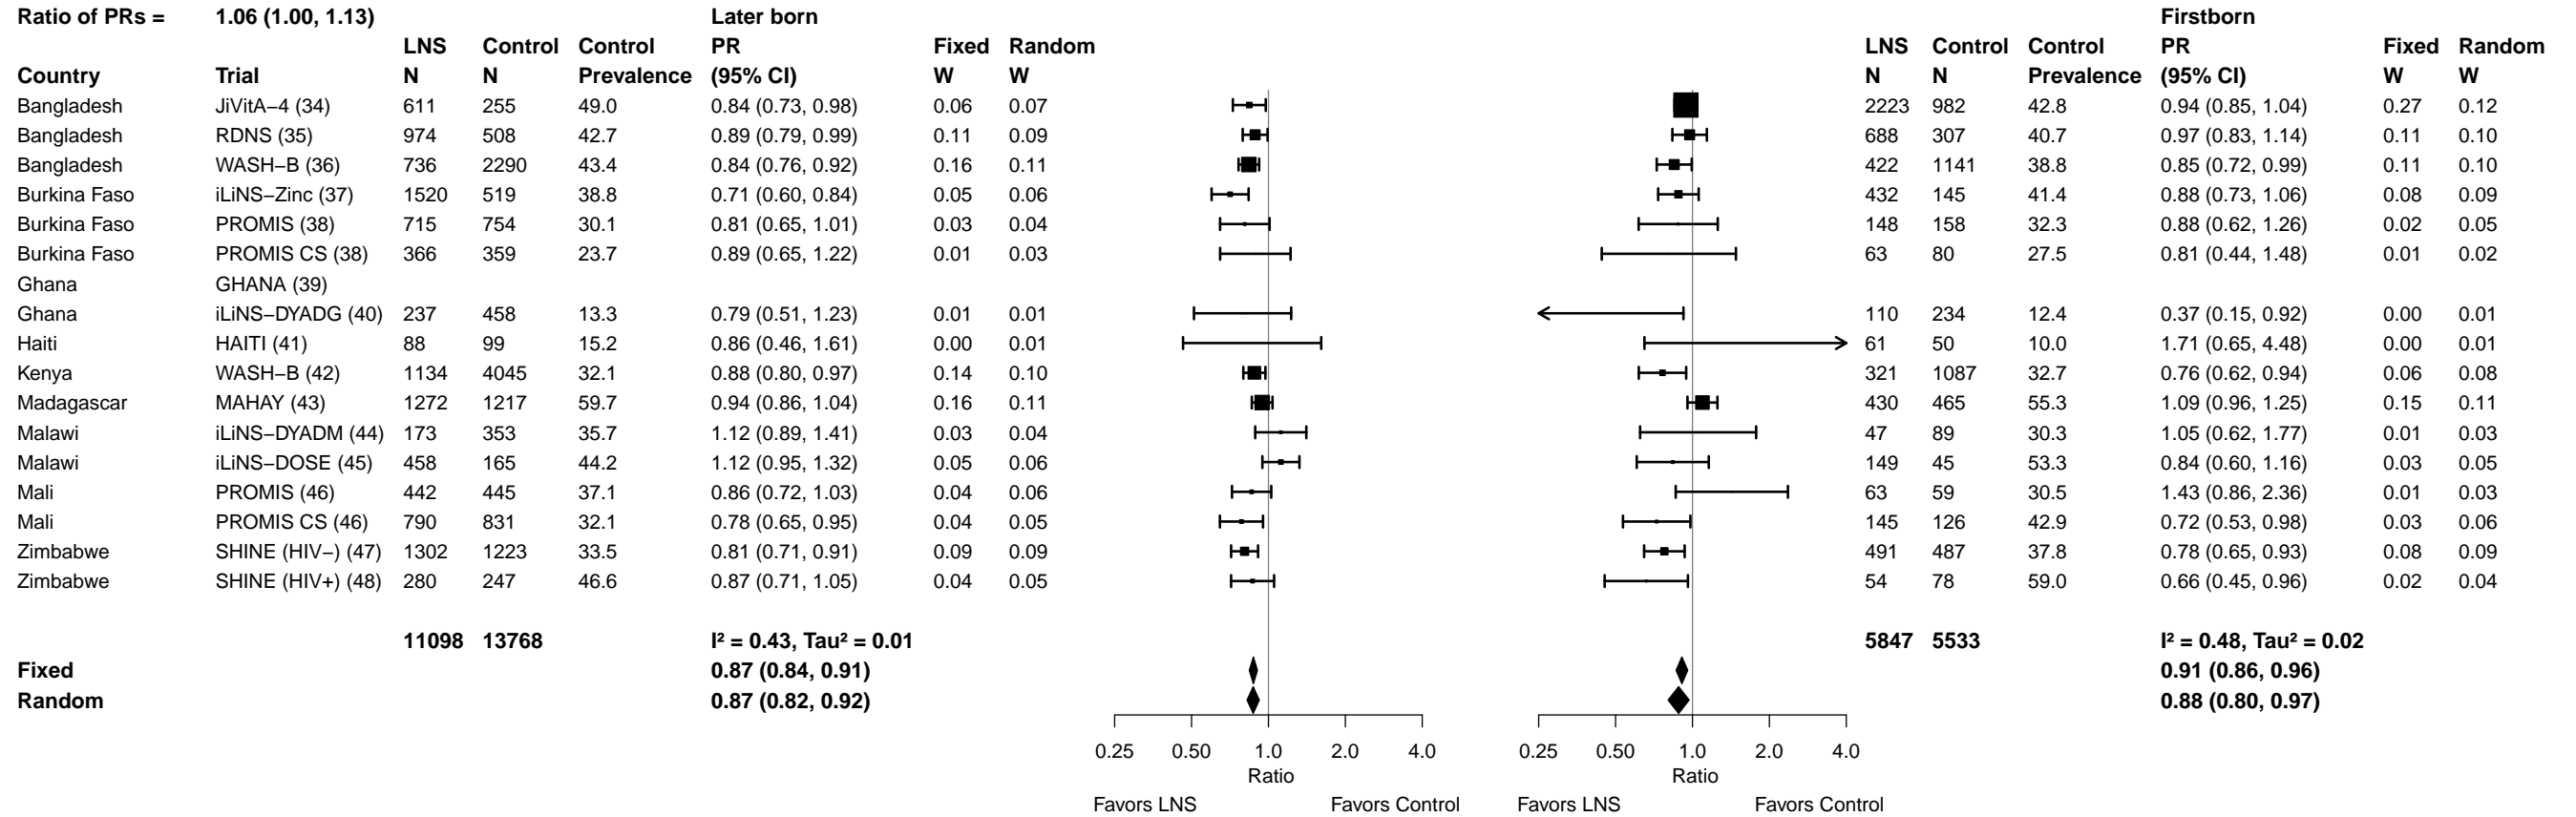

Supplemental figure 6B: Stunting prevalence ratio

6B8: Stratified by Child baseline anthropometric status

P-for-interaction = 0.006

Ratio of PRs = 1.25 (1.07, 1.46)

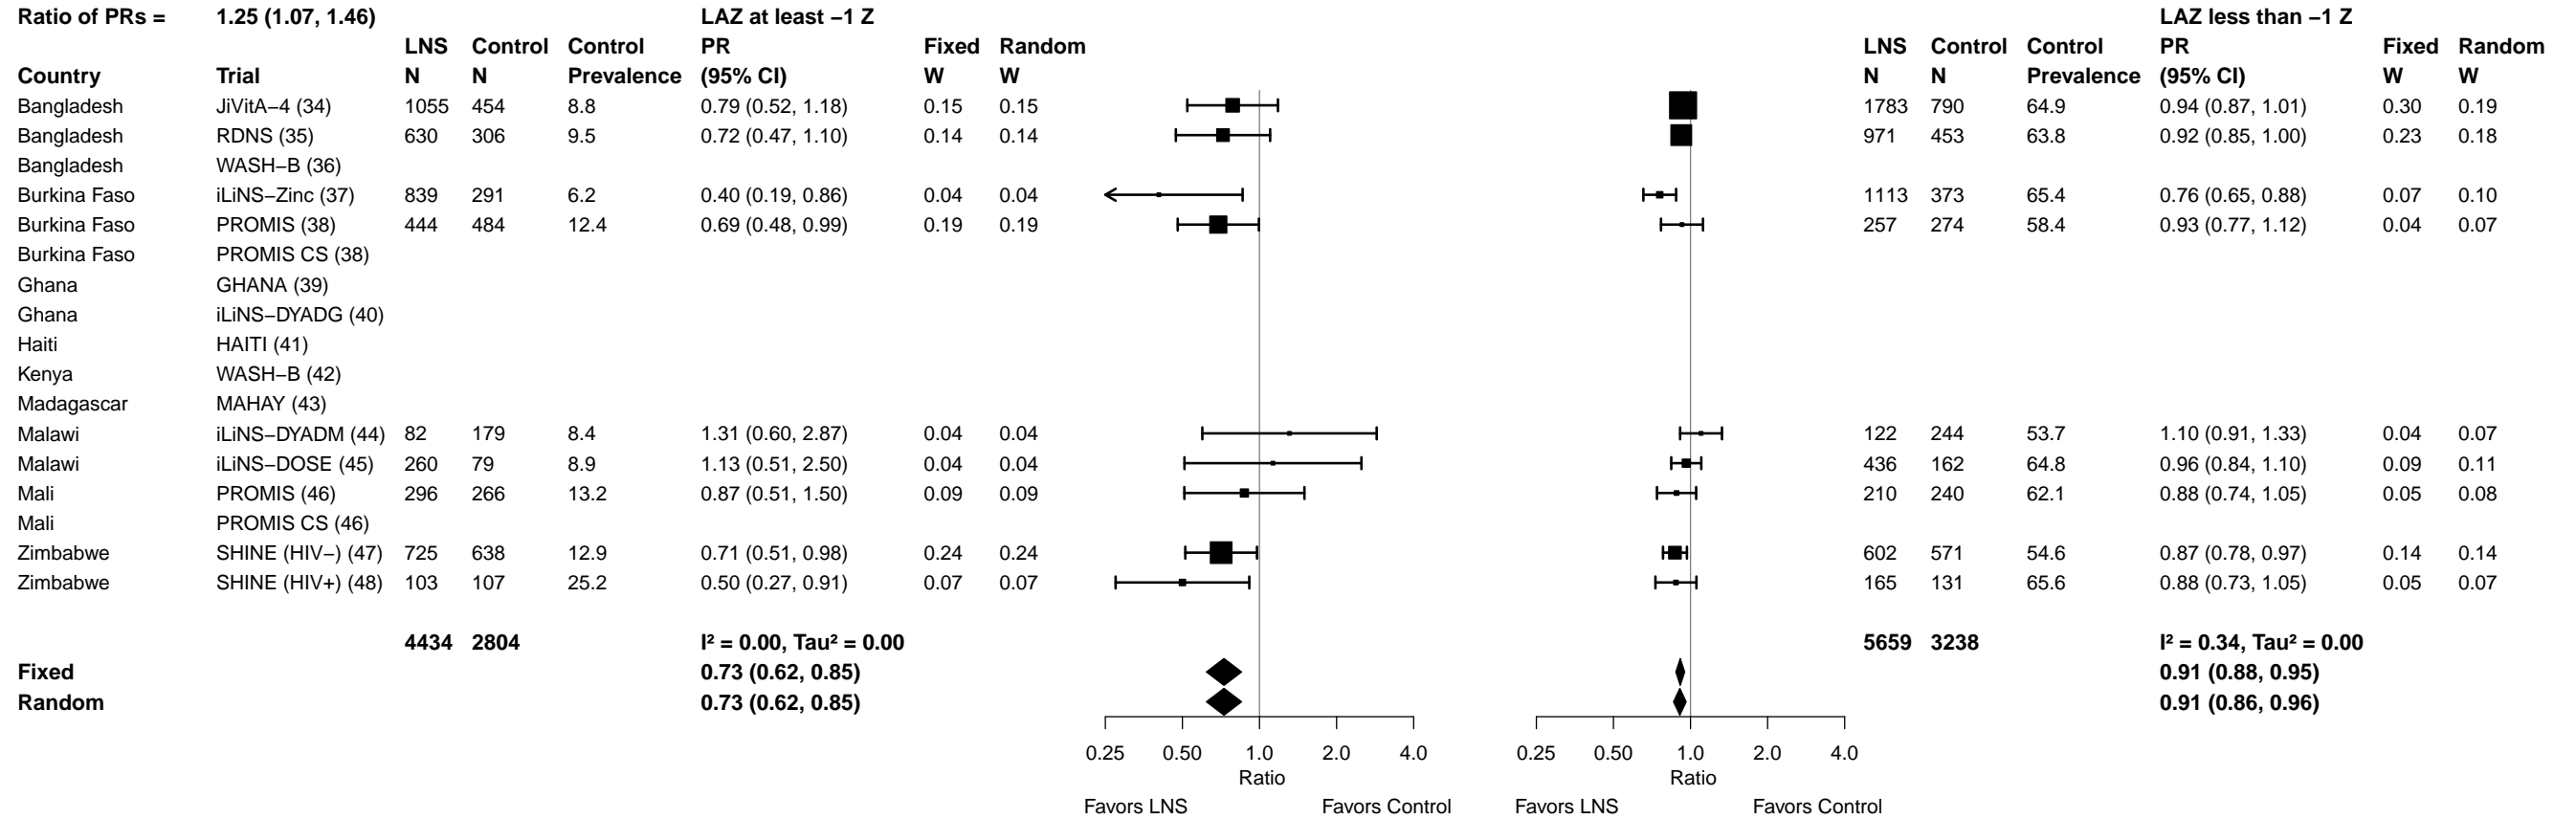

### Supplemental figure 6C: Stunting prevalence difference

#### 6C1: Stratified by Maternal height

P-for-interaction = 0.339

Difference in PDs = 0.02 (-0.02, 0.05)

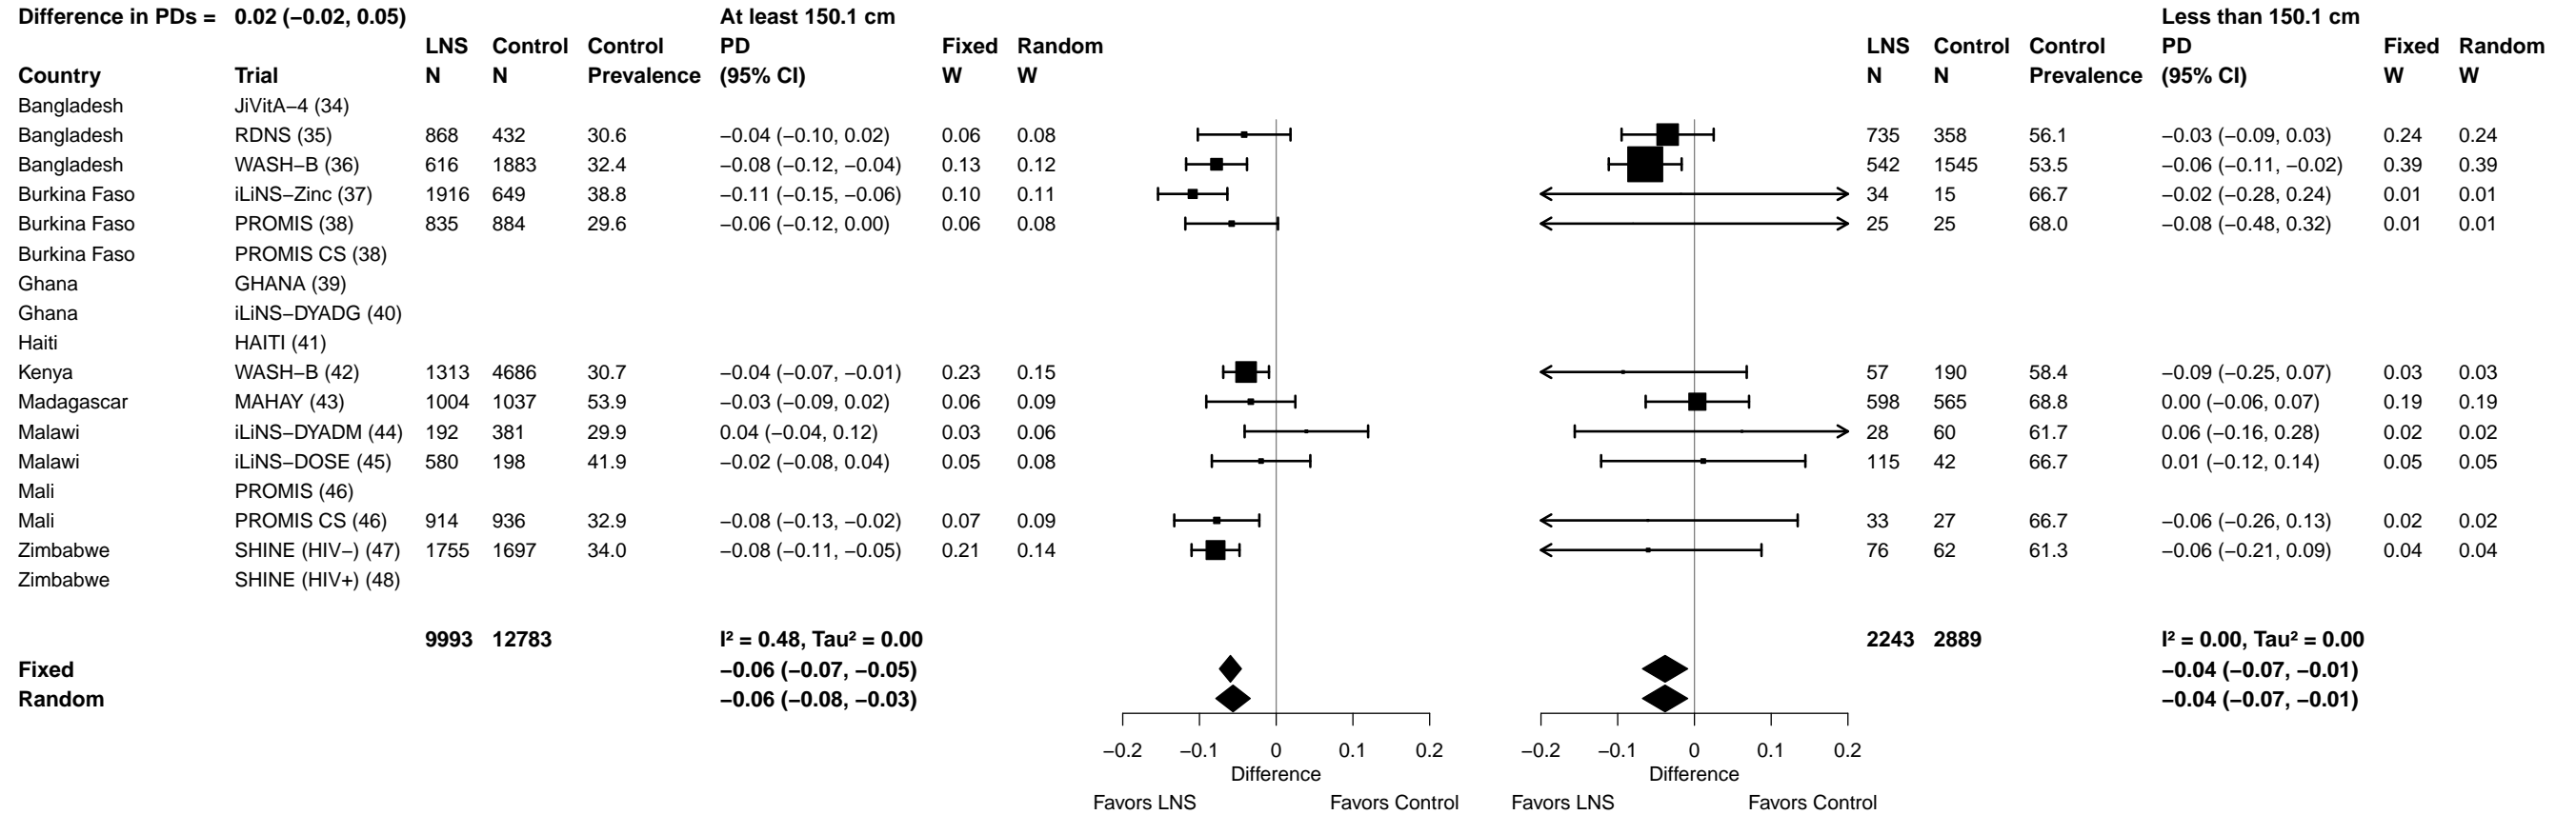

Supplemental figure 6C: Stunting prevalence difference

6C2: Stratified by Maternal BMI

P-for-interaction = 0.306

Difference in PDs = 0.01 (-0.01, 0.04)

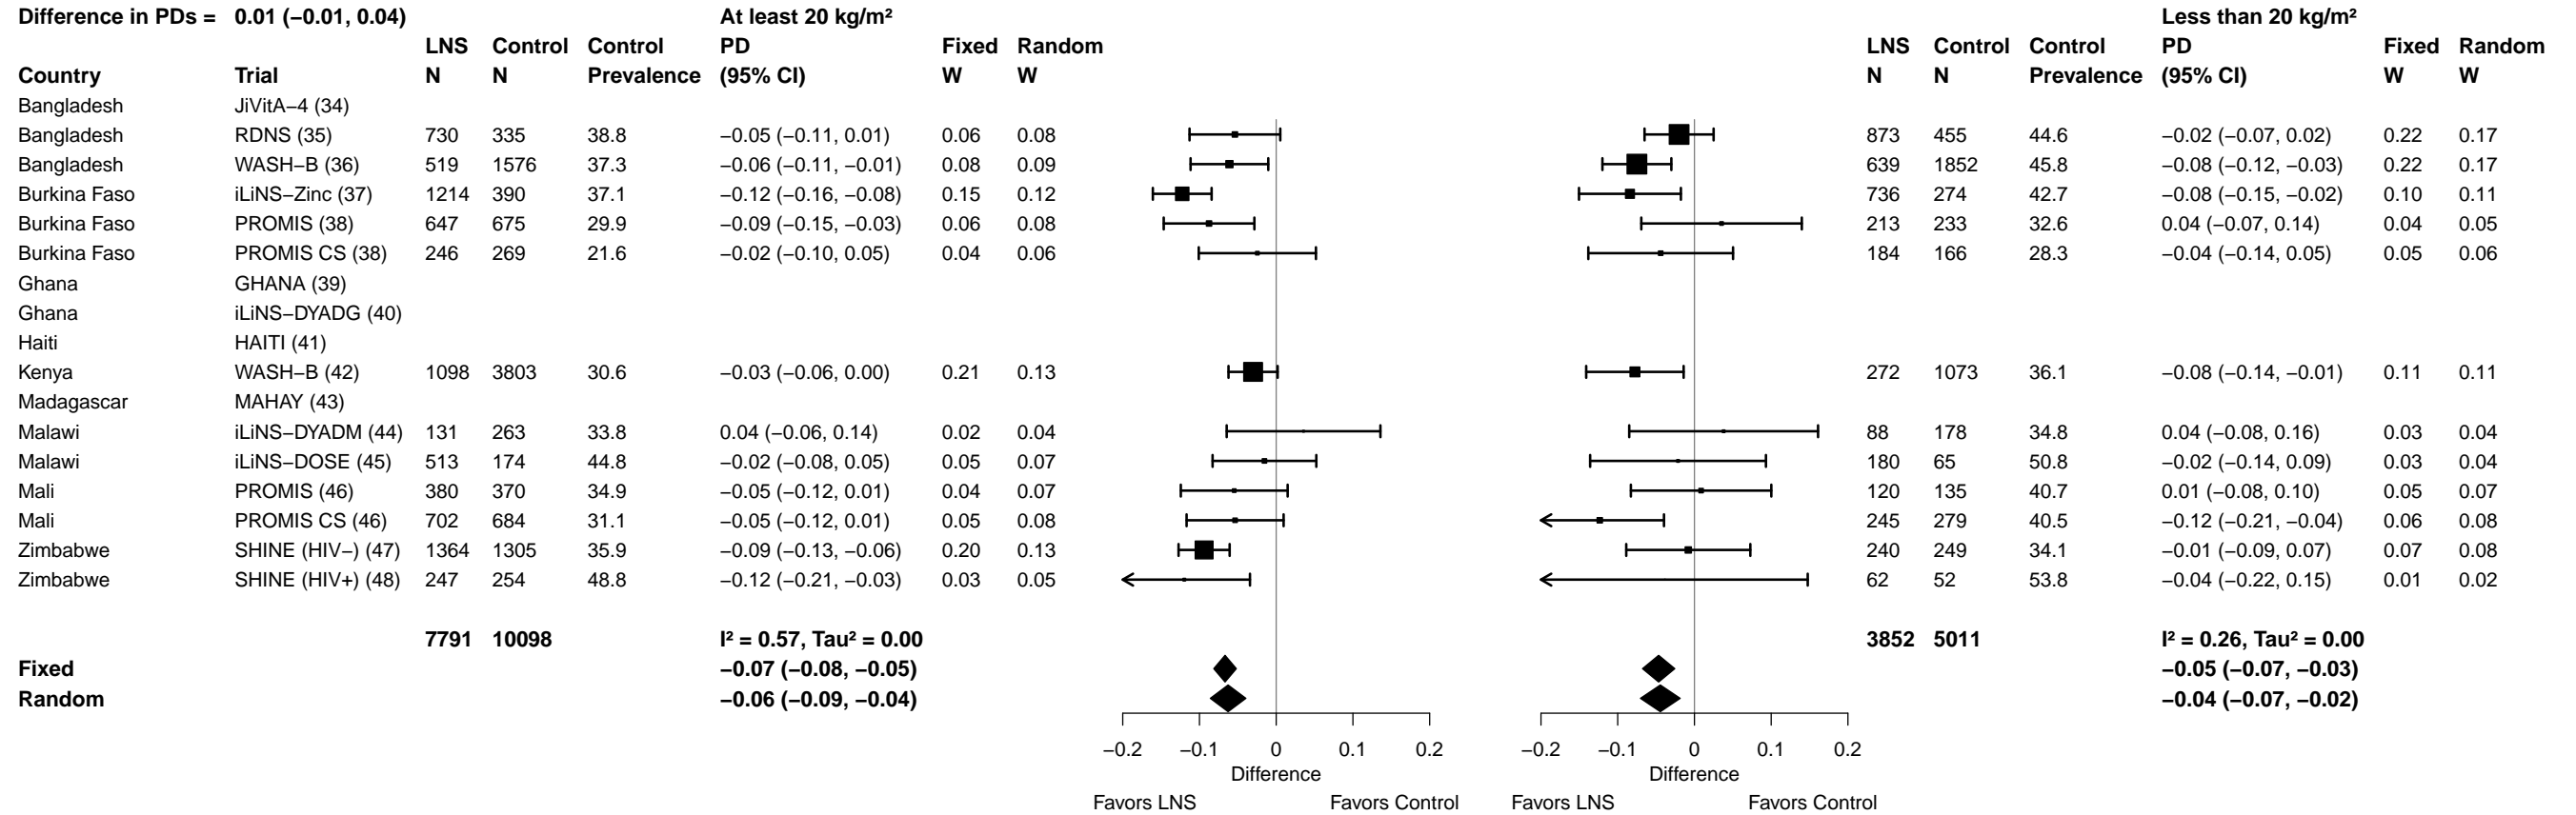

Supplemental figure 6C: Stunting prevalence difference

6C3: Stratified by Maternal age

P-for-interaction = 0.541

Difference in PDs = -0.01 (-0.03, 0.01)

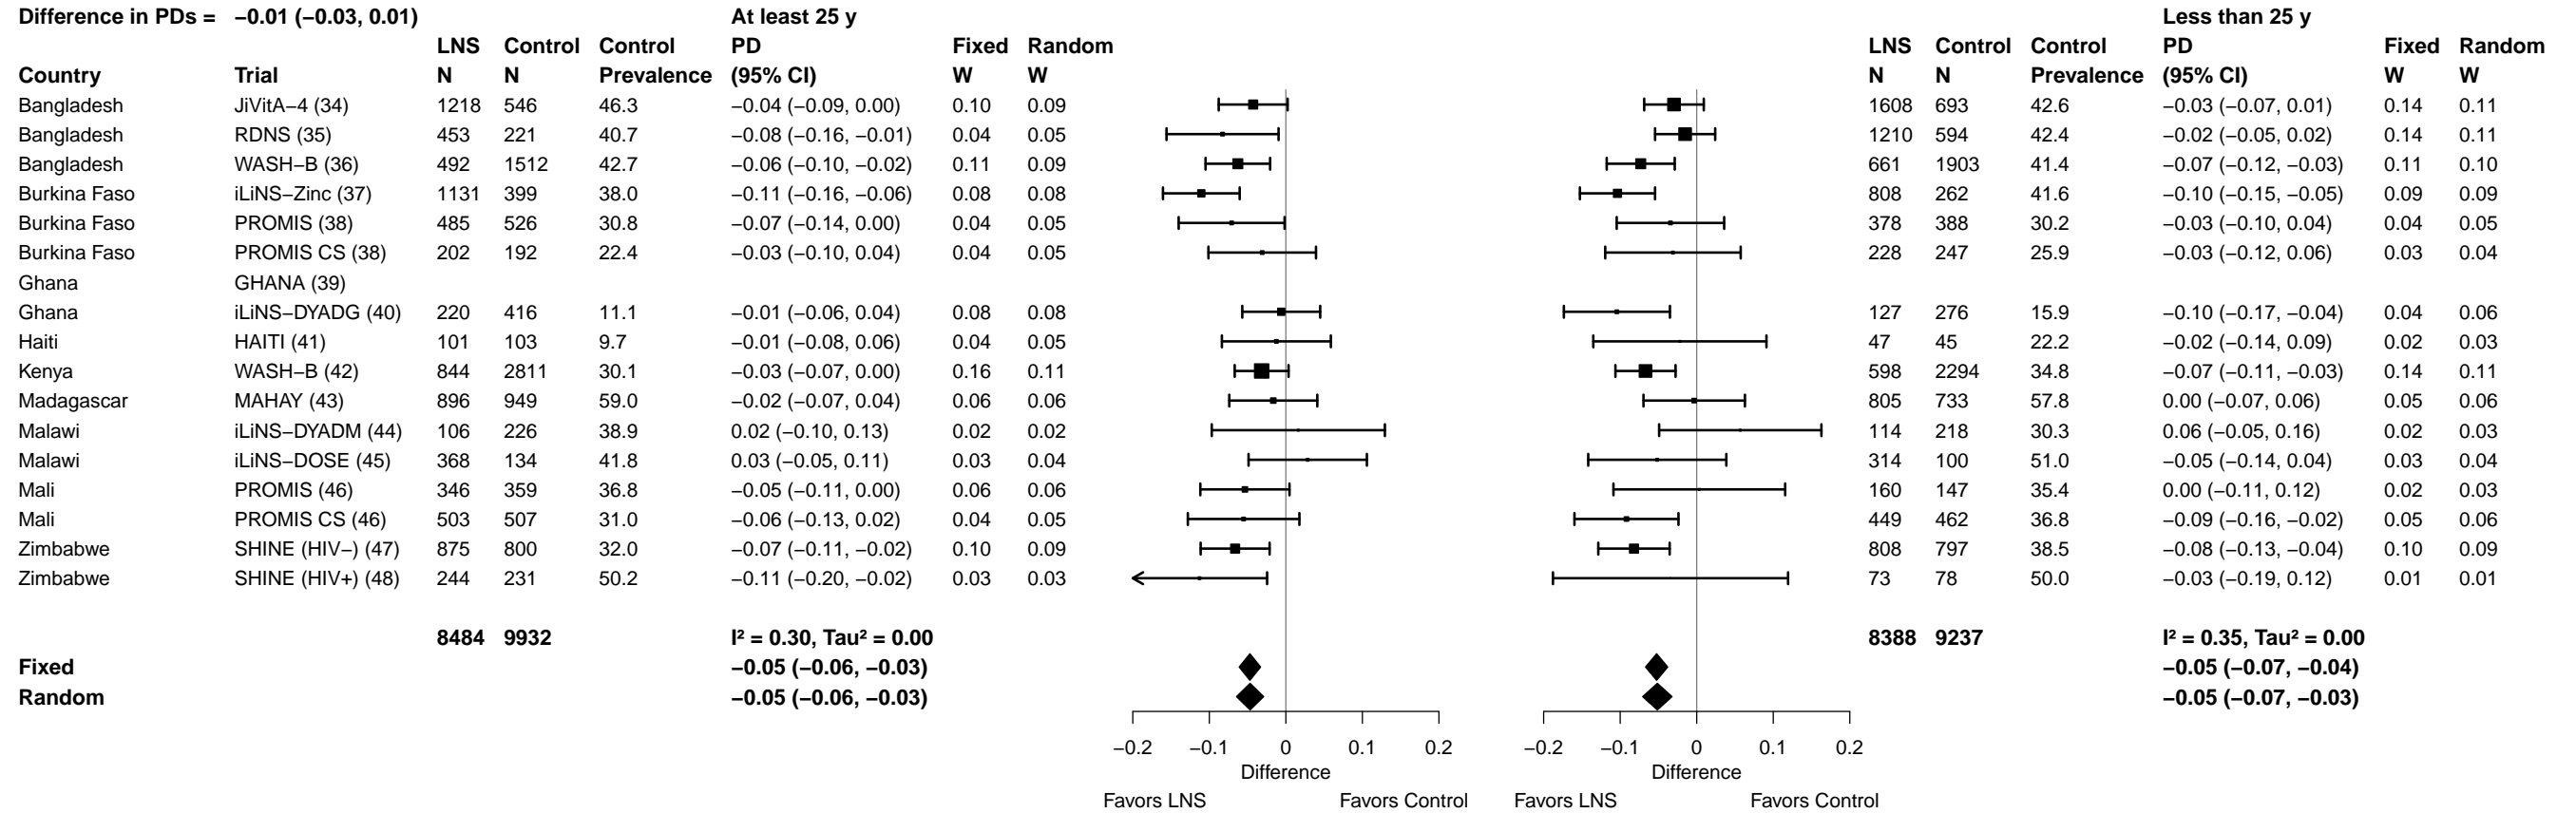



Supplemental figure 6C: Stunting prevalence difference

6C4: Stratified by Maternal education

P-for-interaction = 0.233

Difference in PDs = 0.02 (-0.01, 0.04)

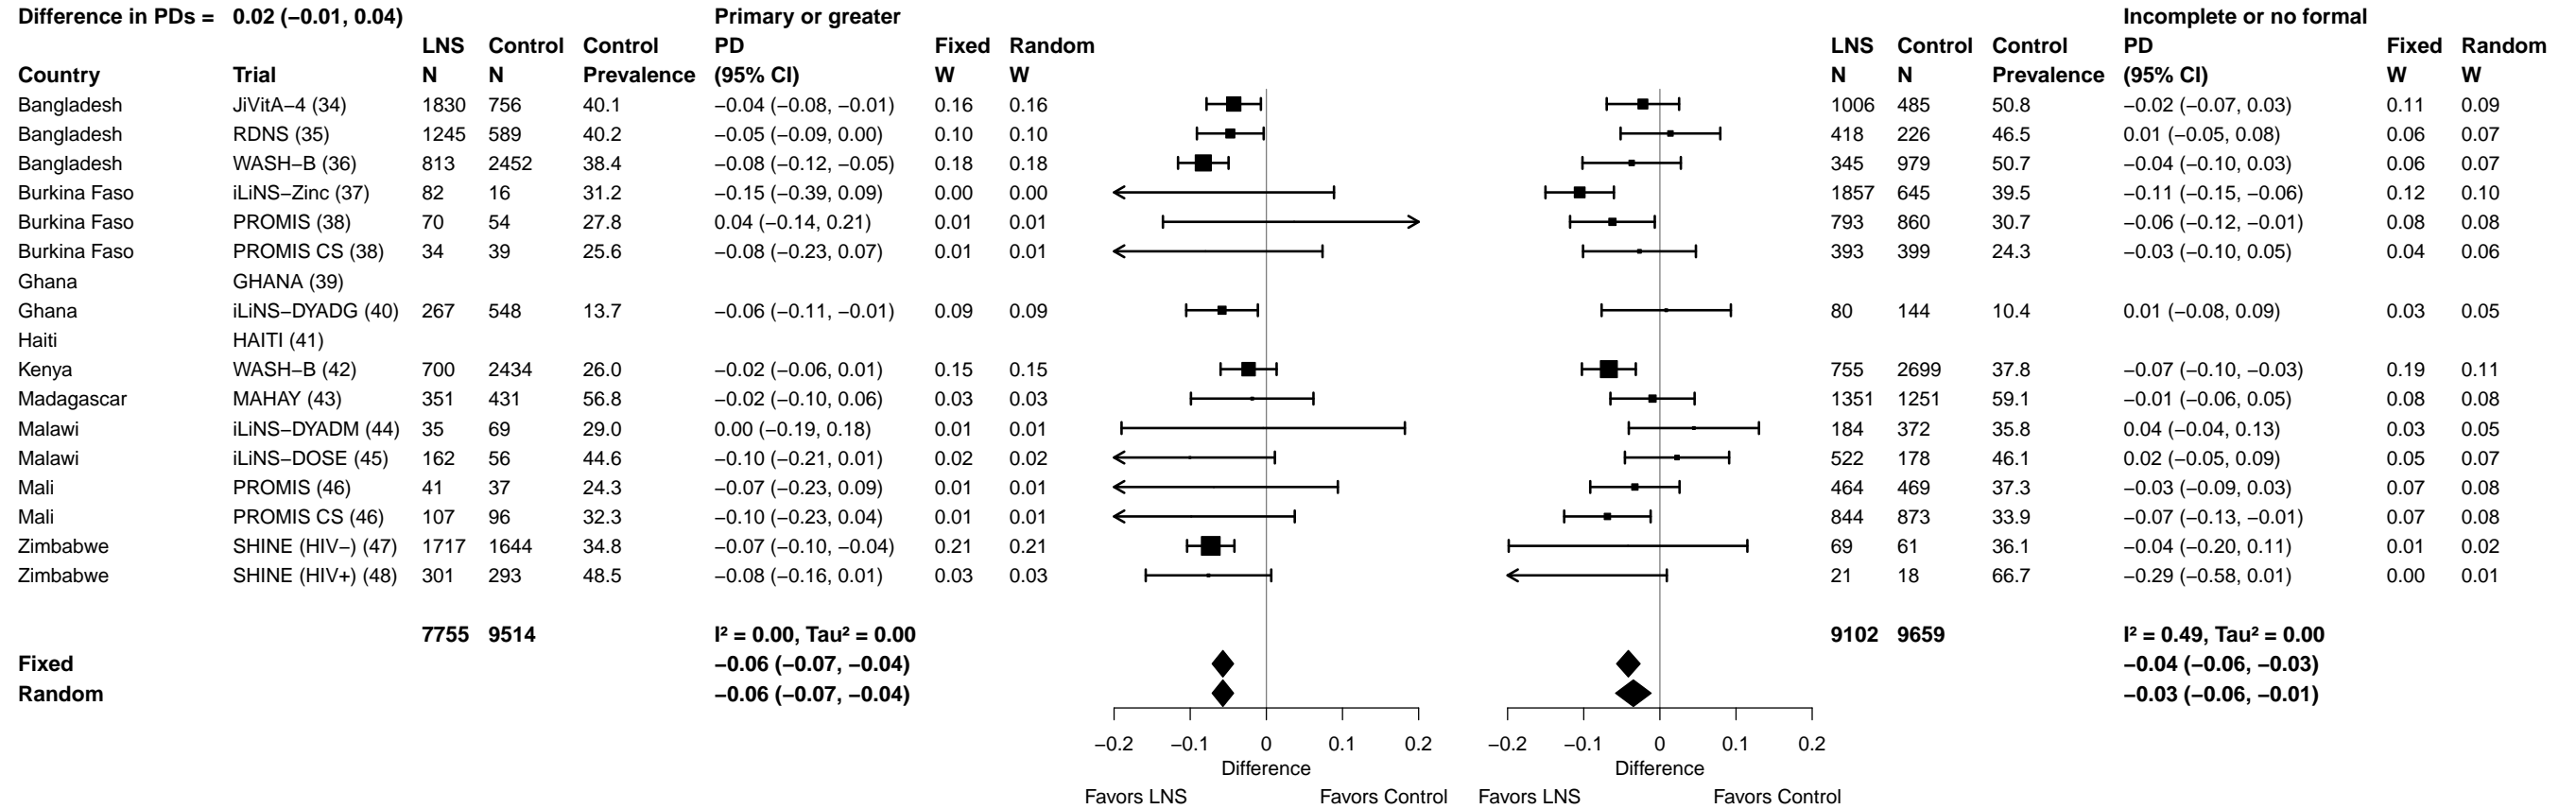



Supplemental figure 6C: Stunting prevalence difference

6C6: Stratified by Child sex

P-for-interaction = 0.187

Difference in PDs = -0.01 (-0.03, 0.01)

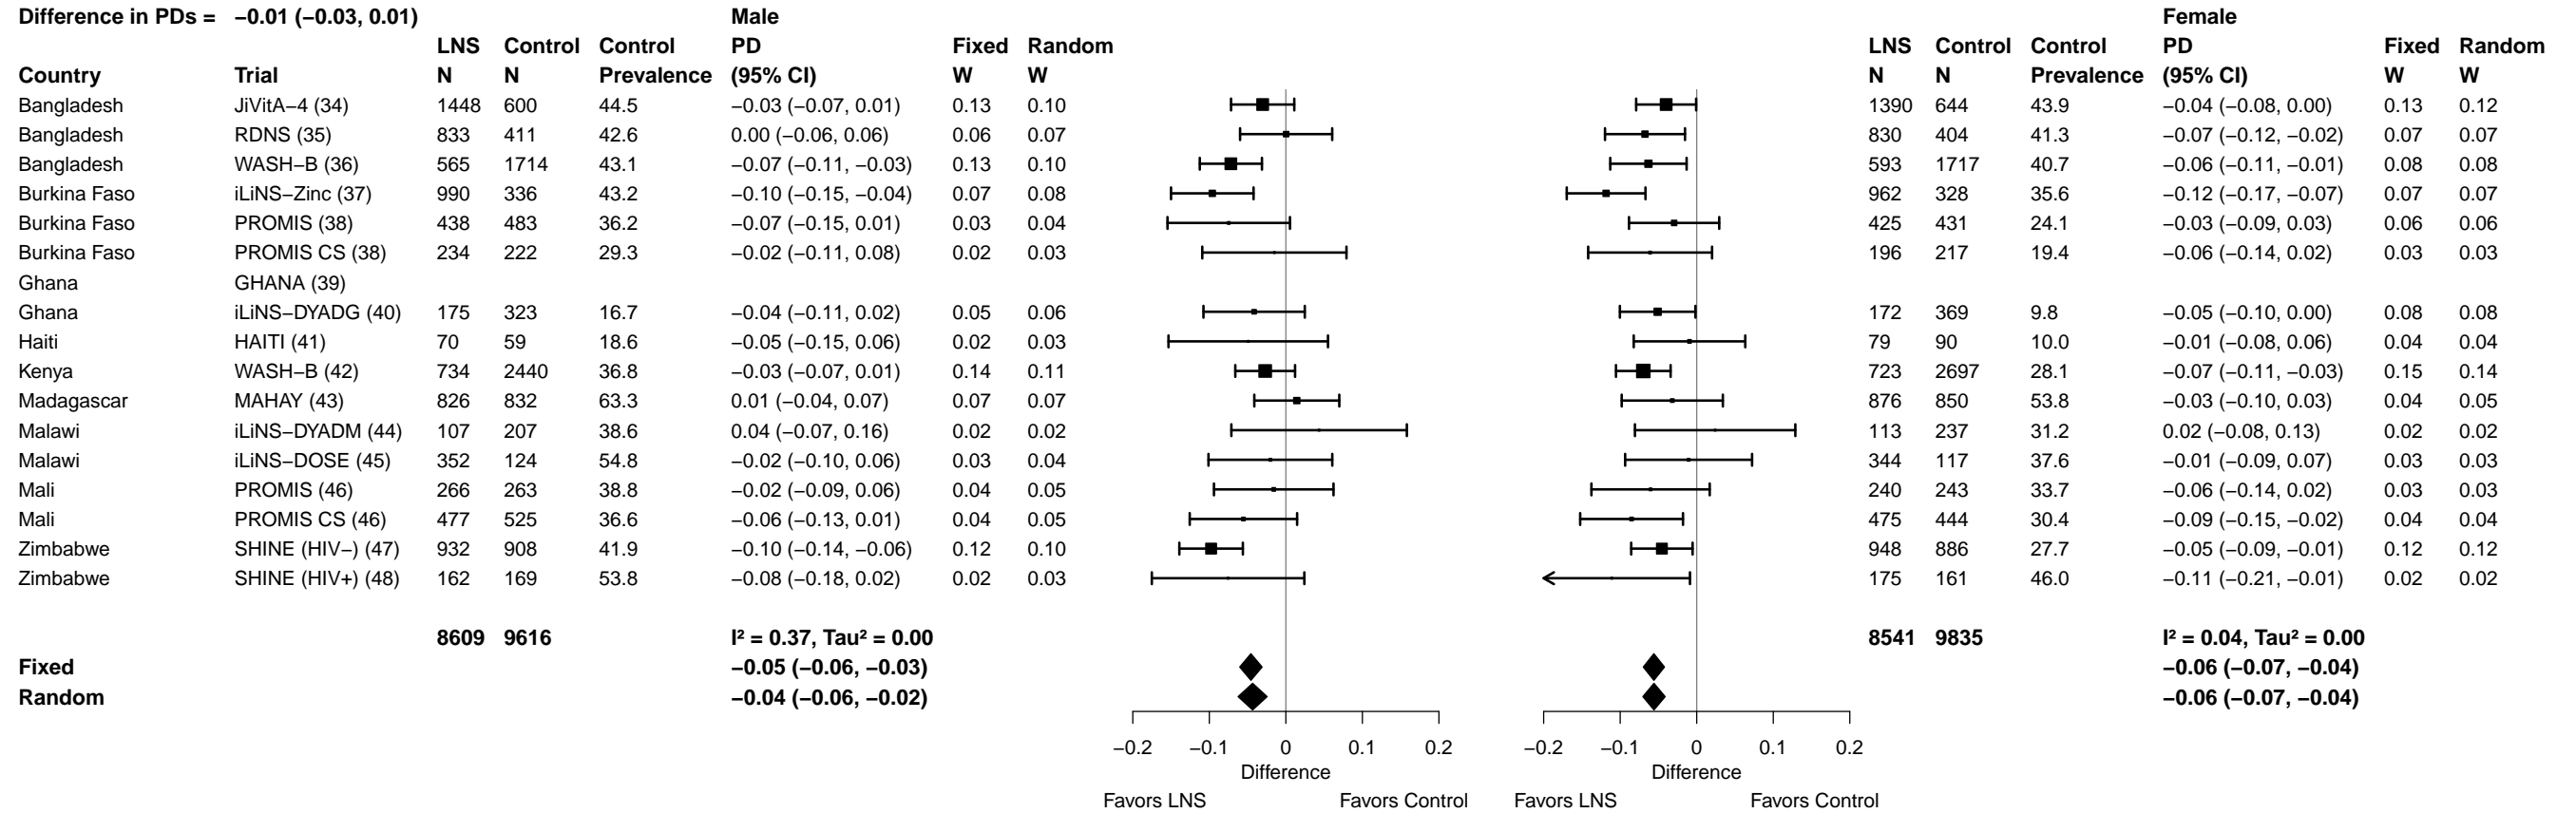

Supplemental figure 6C: Stunting prevalence difference

6C7: Stratified by Child birth order

P-for-interaction = 0.858

Difference in PDs = 0.00 (-0.02, 0.02)

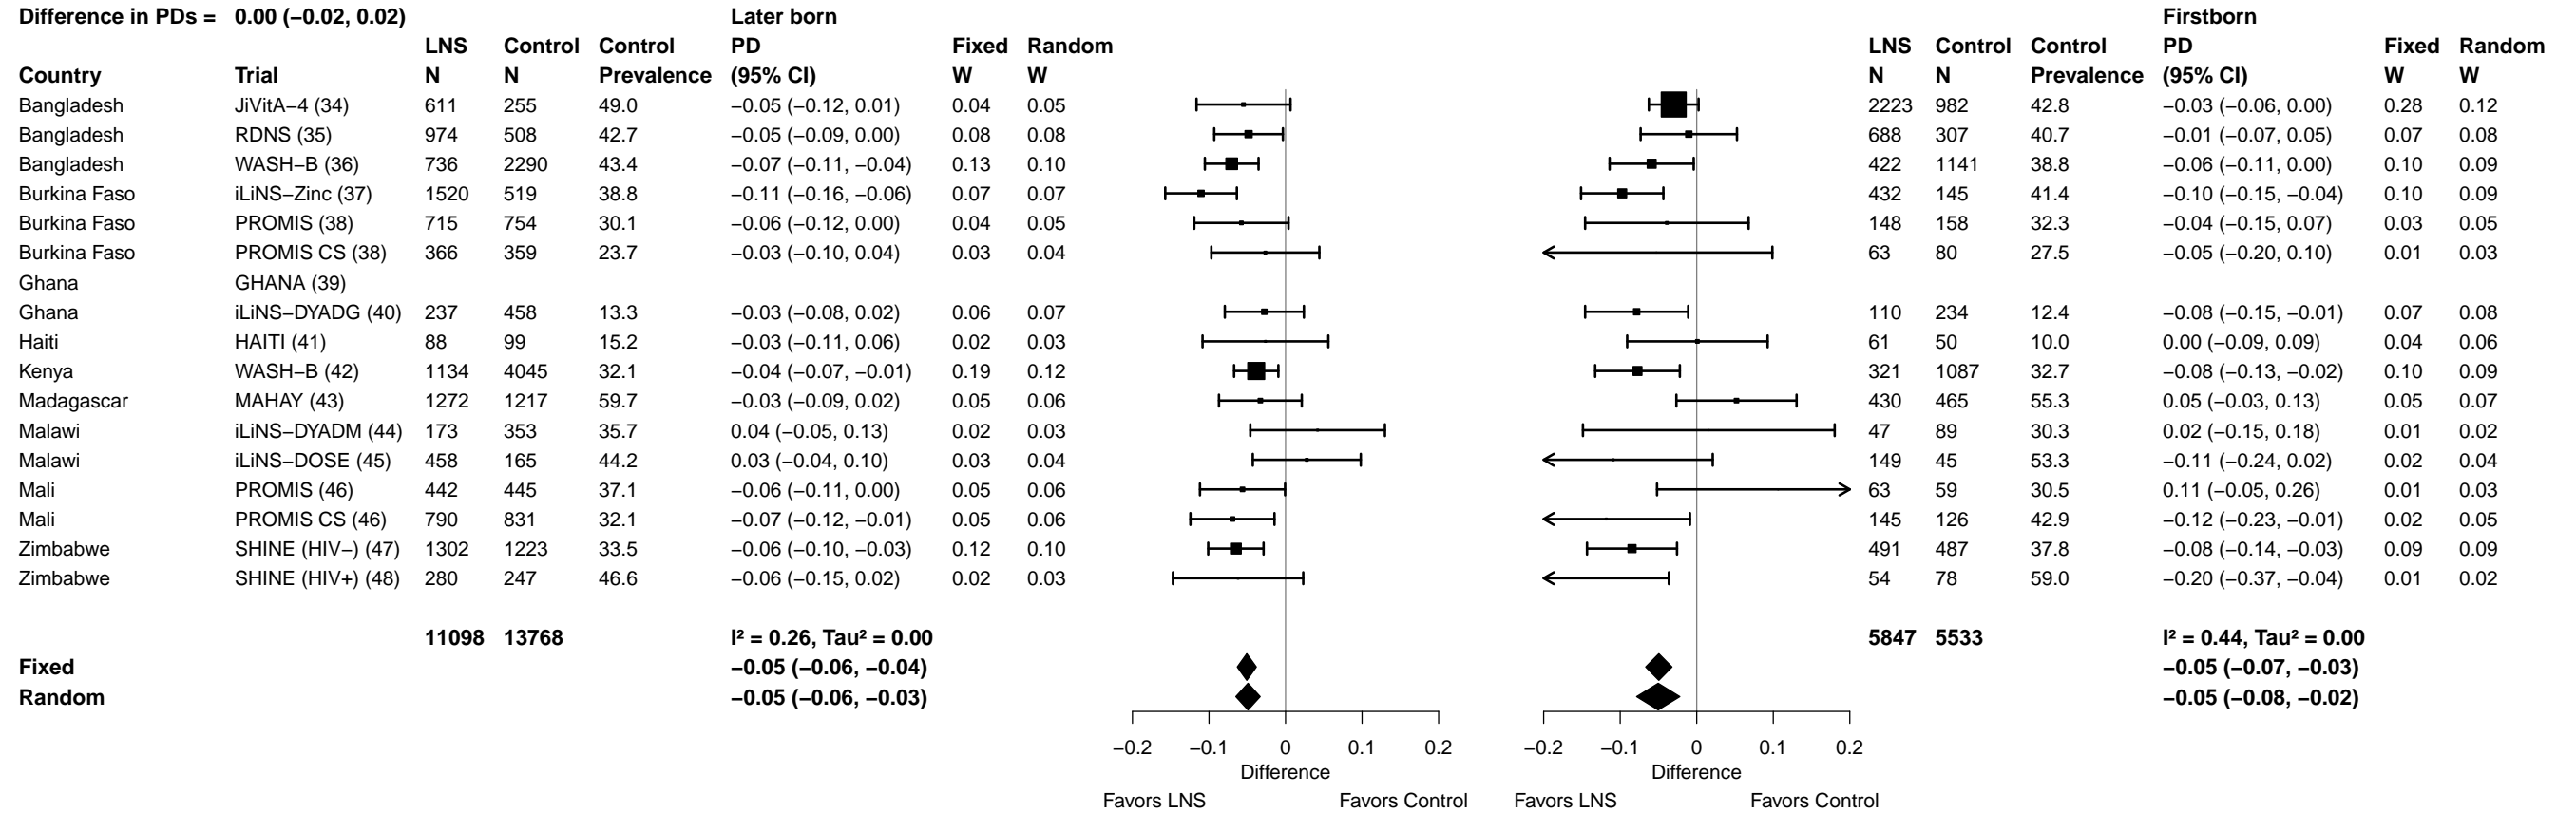

Supplemental figure 6C: Stunting prevalence difference

6C8: Stratified by Child baseline anthropometric status

P-for-interaction = 0.004

Difference in PDs = -0.04 (-0.06, -0.01)

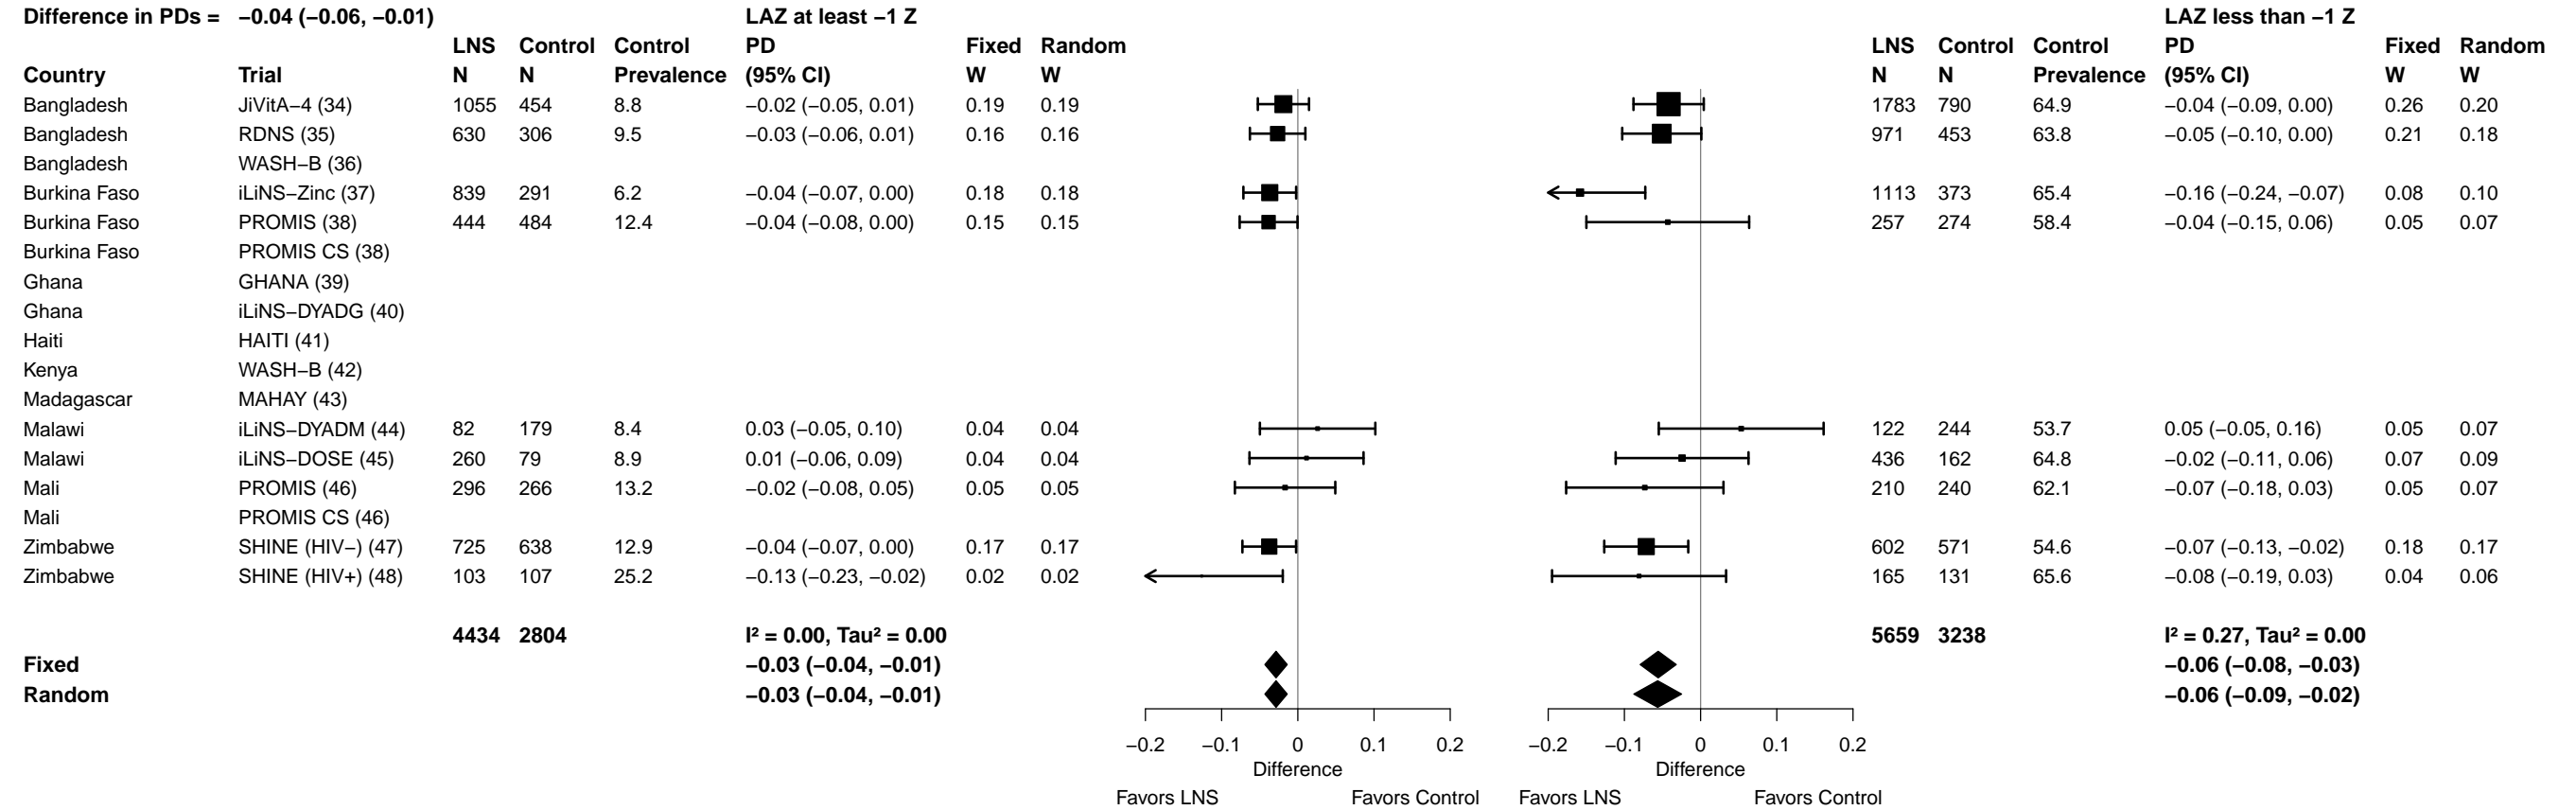

### Supplemental figure 6D: Mean difference in WLZ

#### 6D1: Stratified by Maternal height

P-for-interaction = 0.630

Difference in MDs = -0.02 (-0.09, 0.05)

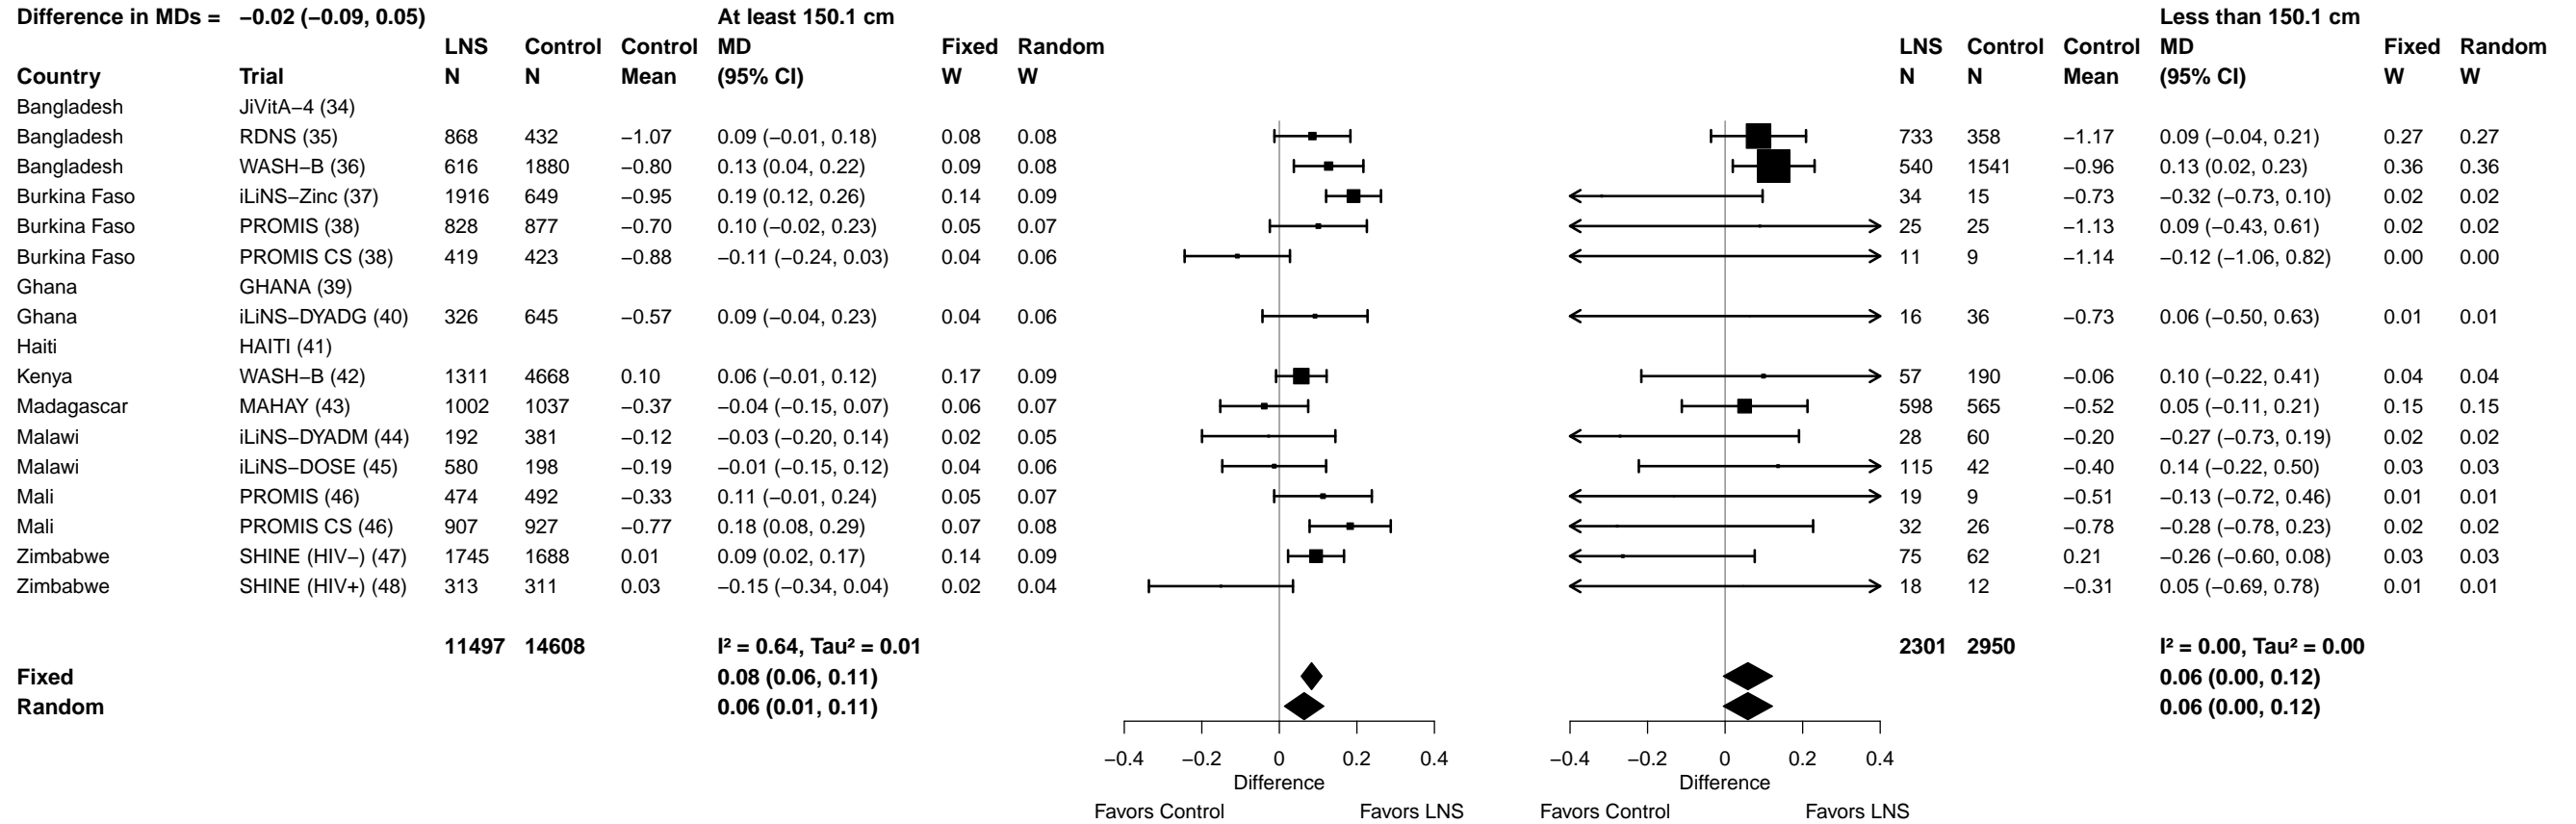

Supplemental figure 6D: Mean difference in WLZ

6D2: Stratified by Maternal BMI

P-for-interaction = 0.849

Difference in MDs = 0.00 (-0.05, 0.04)

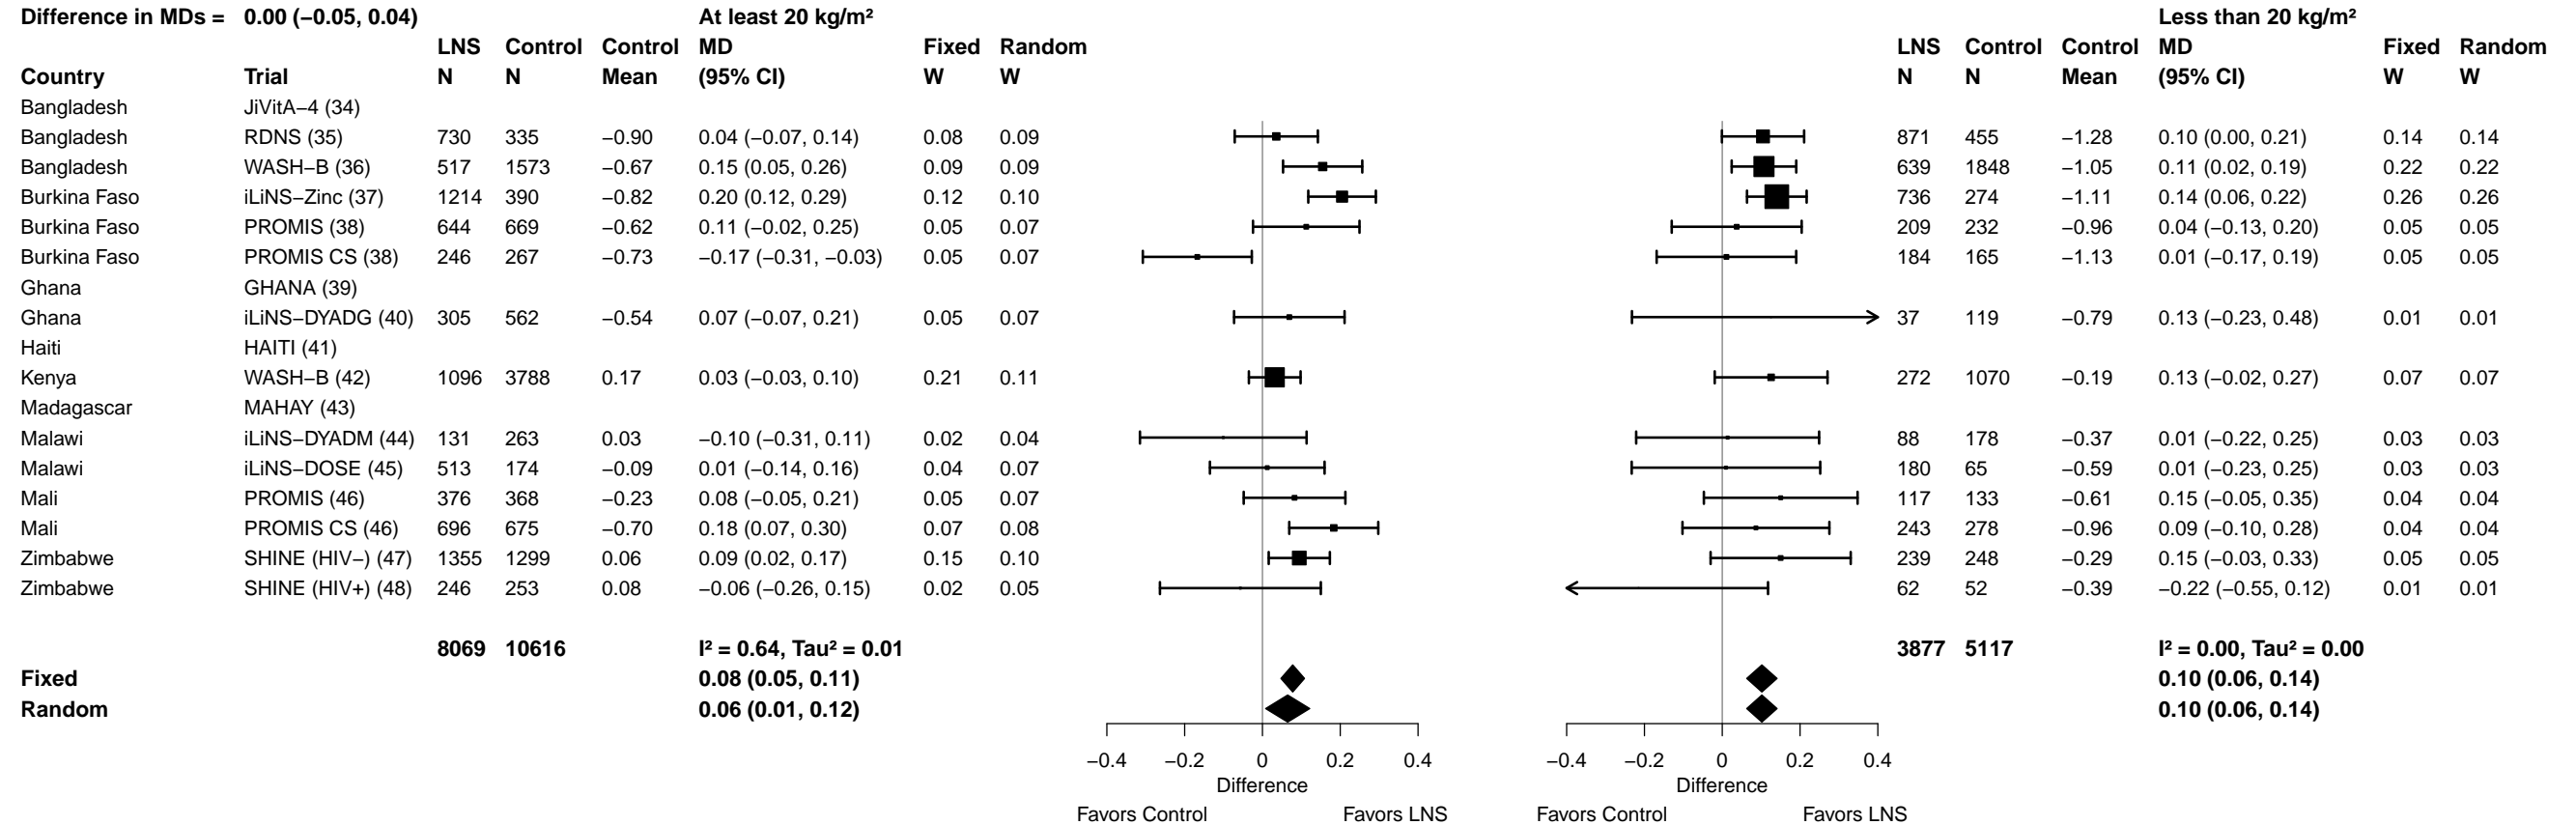

Supplemental figure 6D: Mean difference in WLZ

6D3: Stratified by Maternal age

P-for-interaction = 0.354

Difference in MDs = -0.02 (-0.06, 0.02)

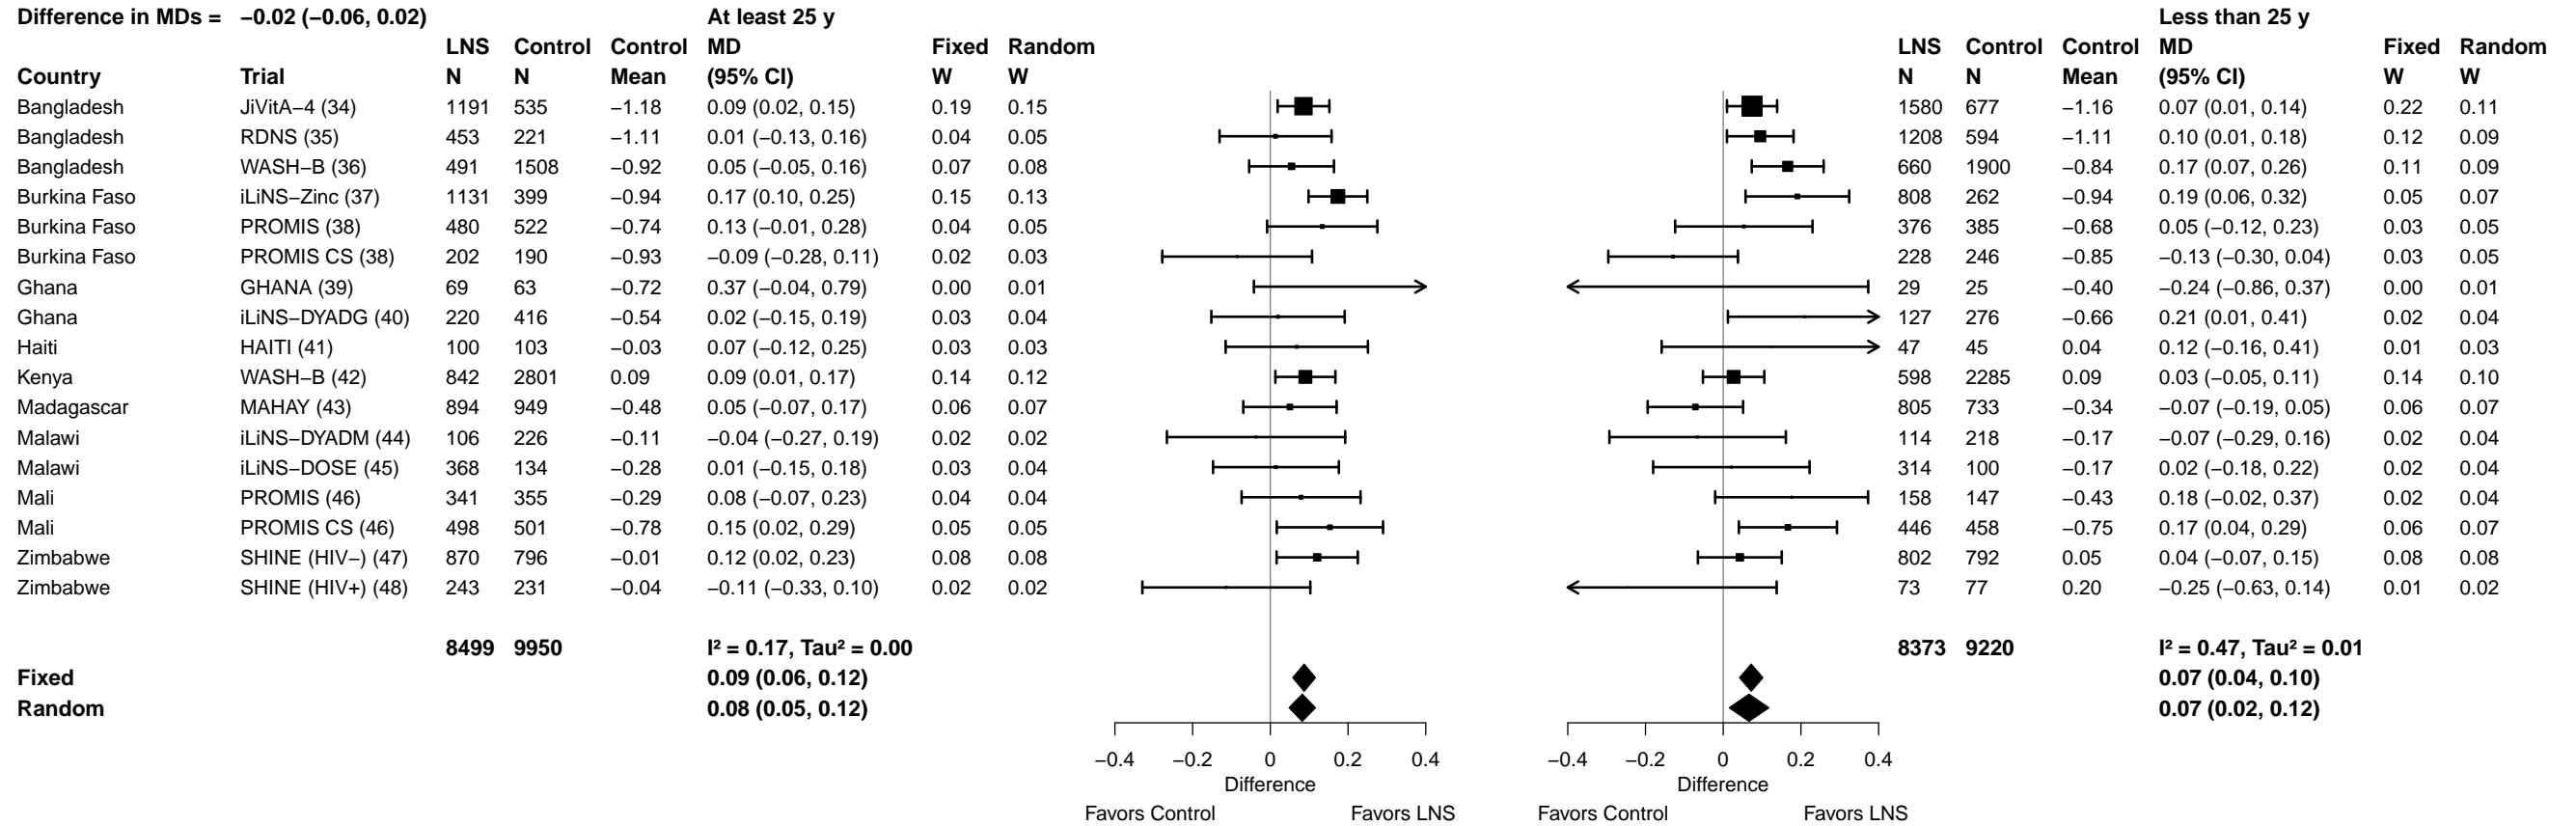



Supplemental figure 6D: Mean difference in WLZ

6D4: Stratified by Maternal education

P-for-interaction = 0.629

Difference in MDs = 0.01 (-0.04, 0.06)

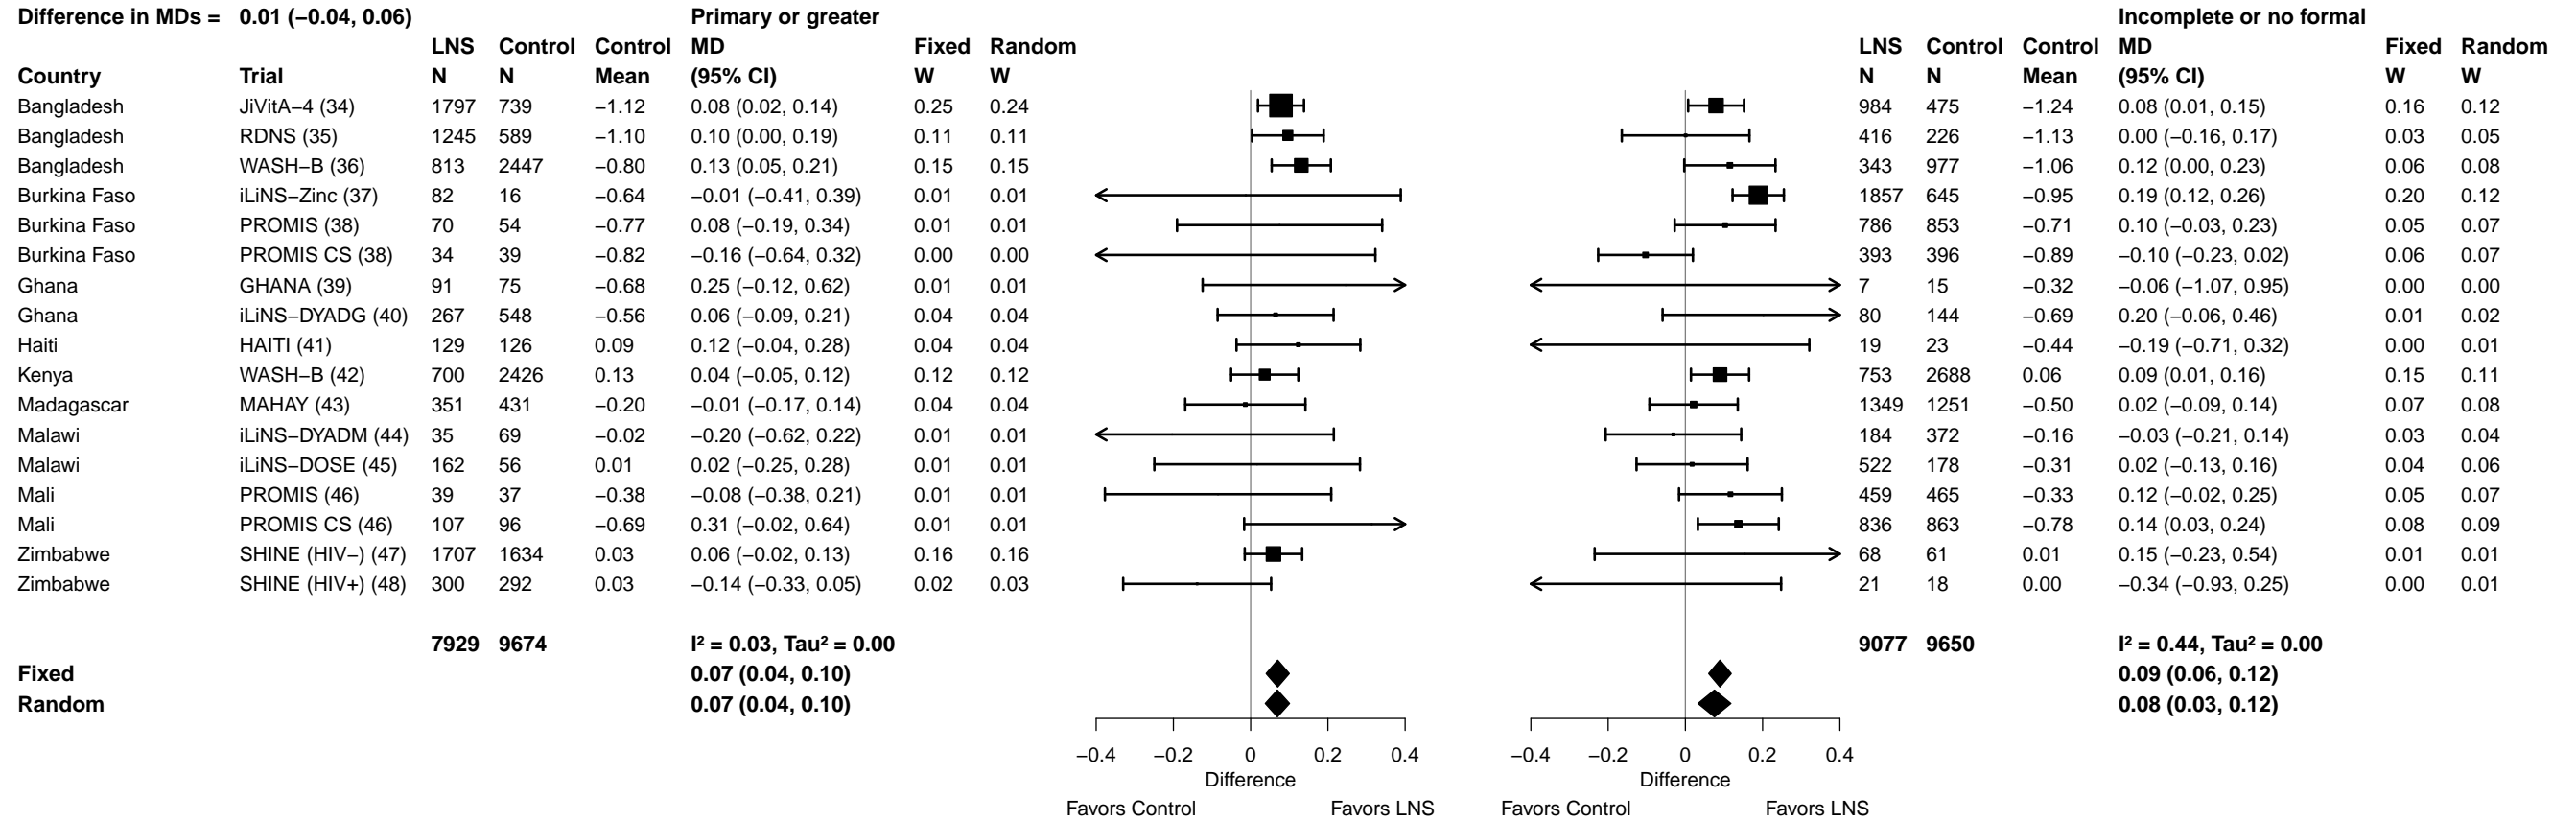

Supplemental figure 6D: Mean difference in WLZ

6D5: Stratified by Maternal depressive symptoms

P-for-interaction = 0.863

Difference in MDs = -0.01 (-0.07, 0.05)

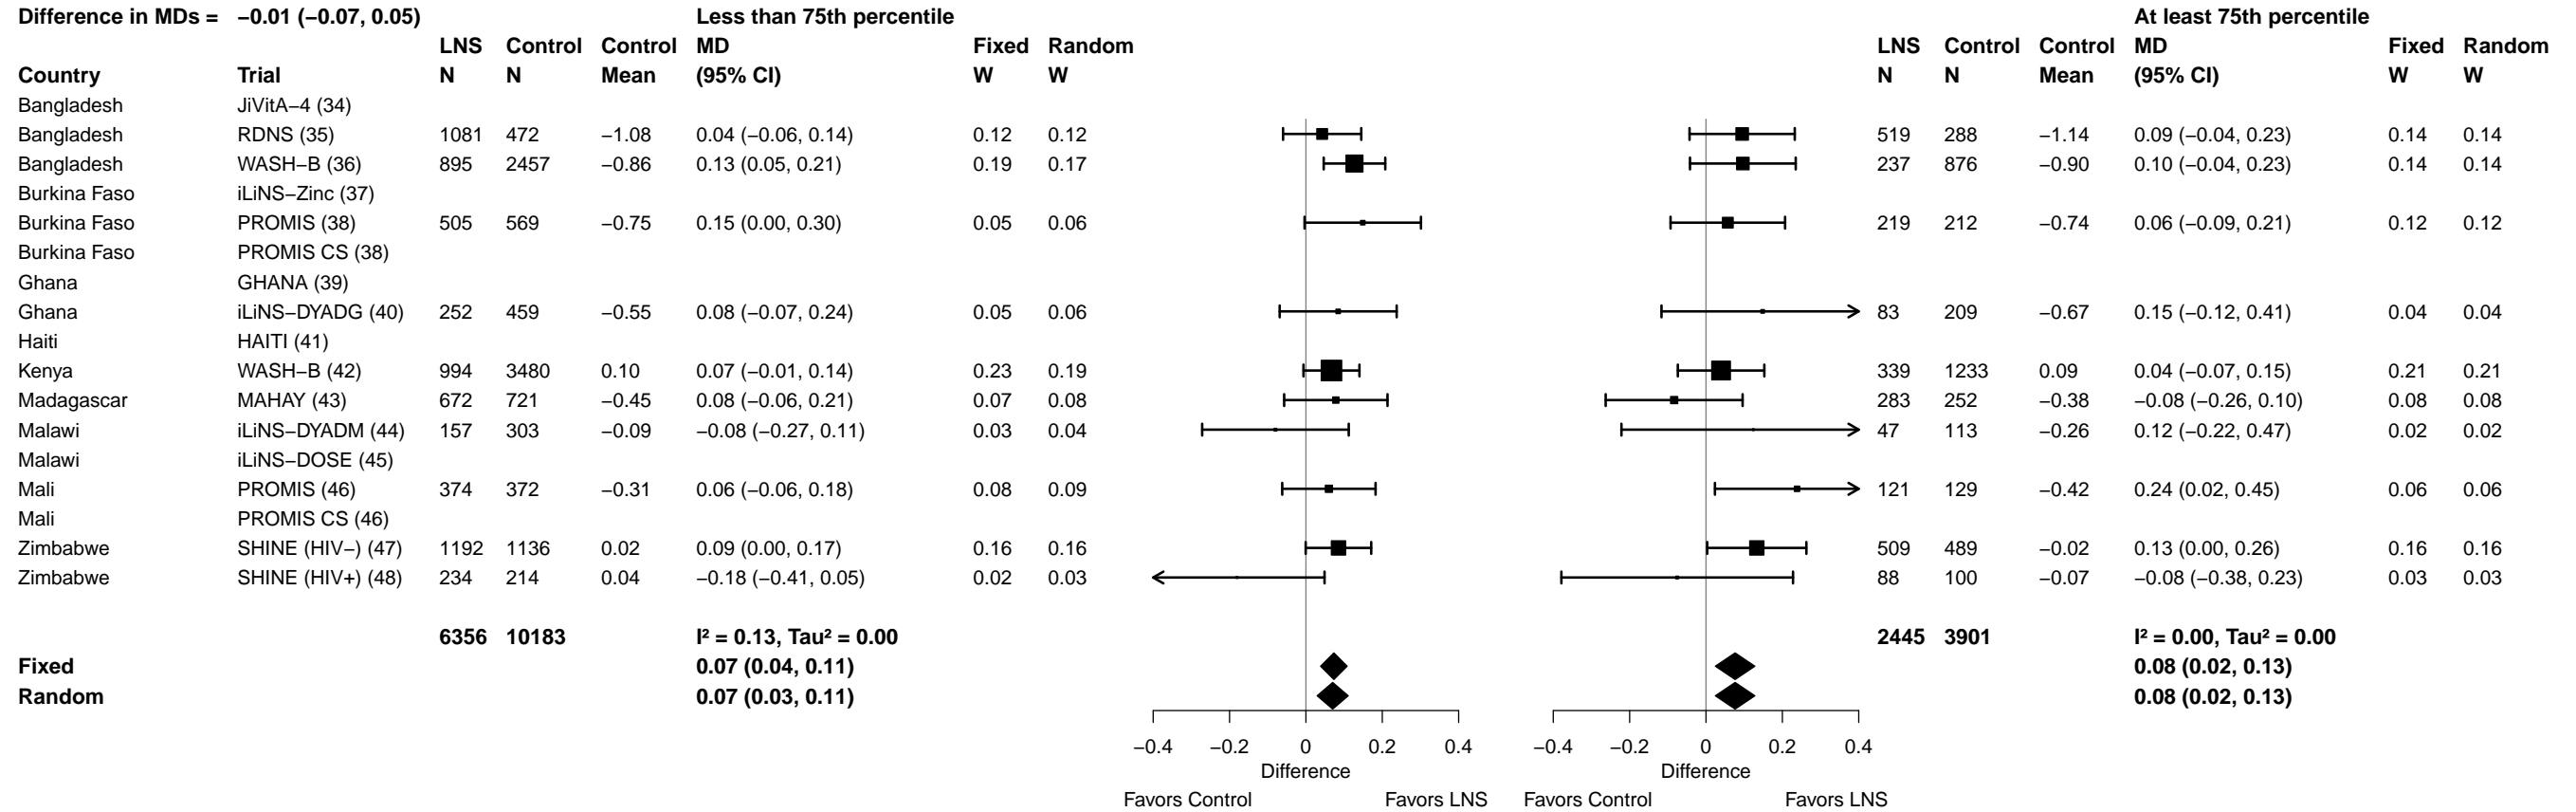



Supplemental figure 6D: Mean difference in WLZ

6D7: Stratified by Child birth order

P-for-interaction = 0.250

Difference in MDs = -0.03 (-0.07, 0.02)

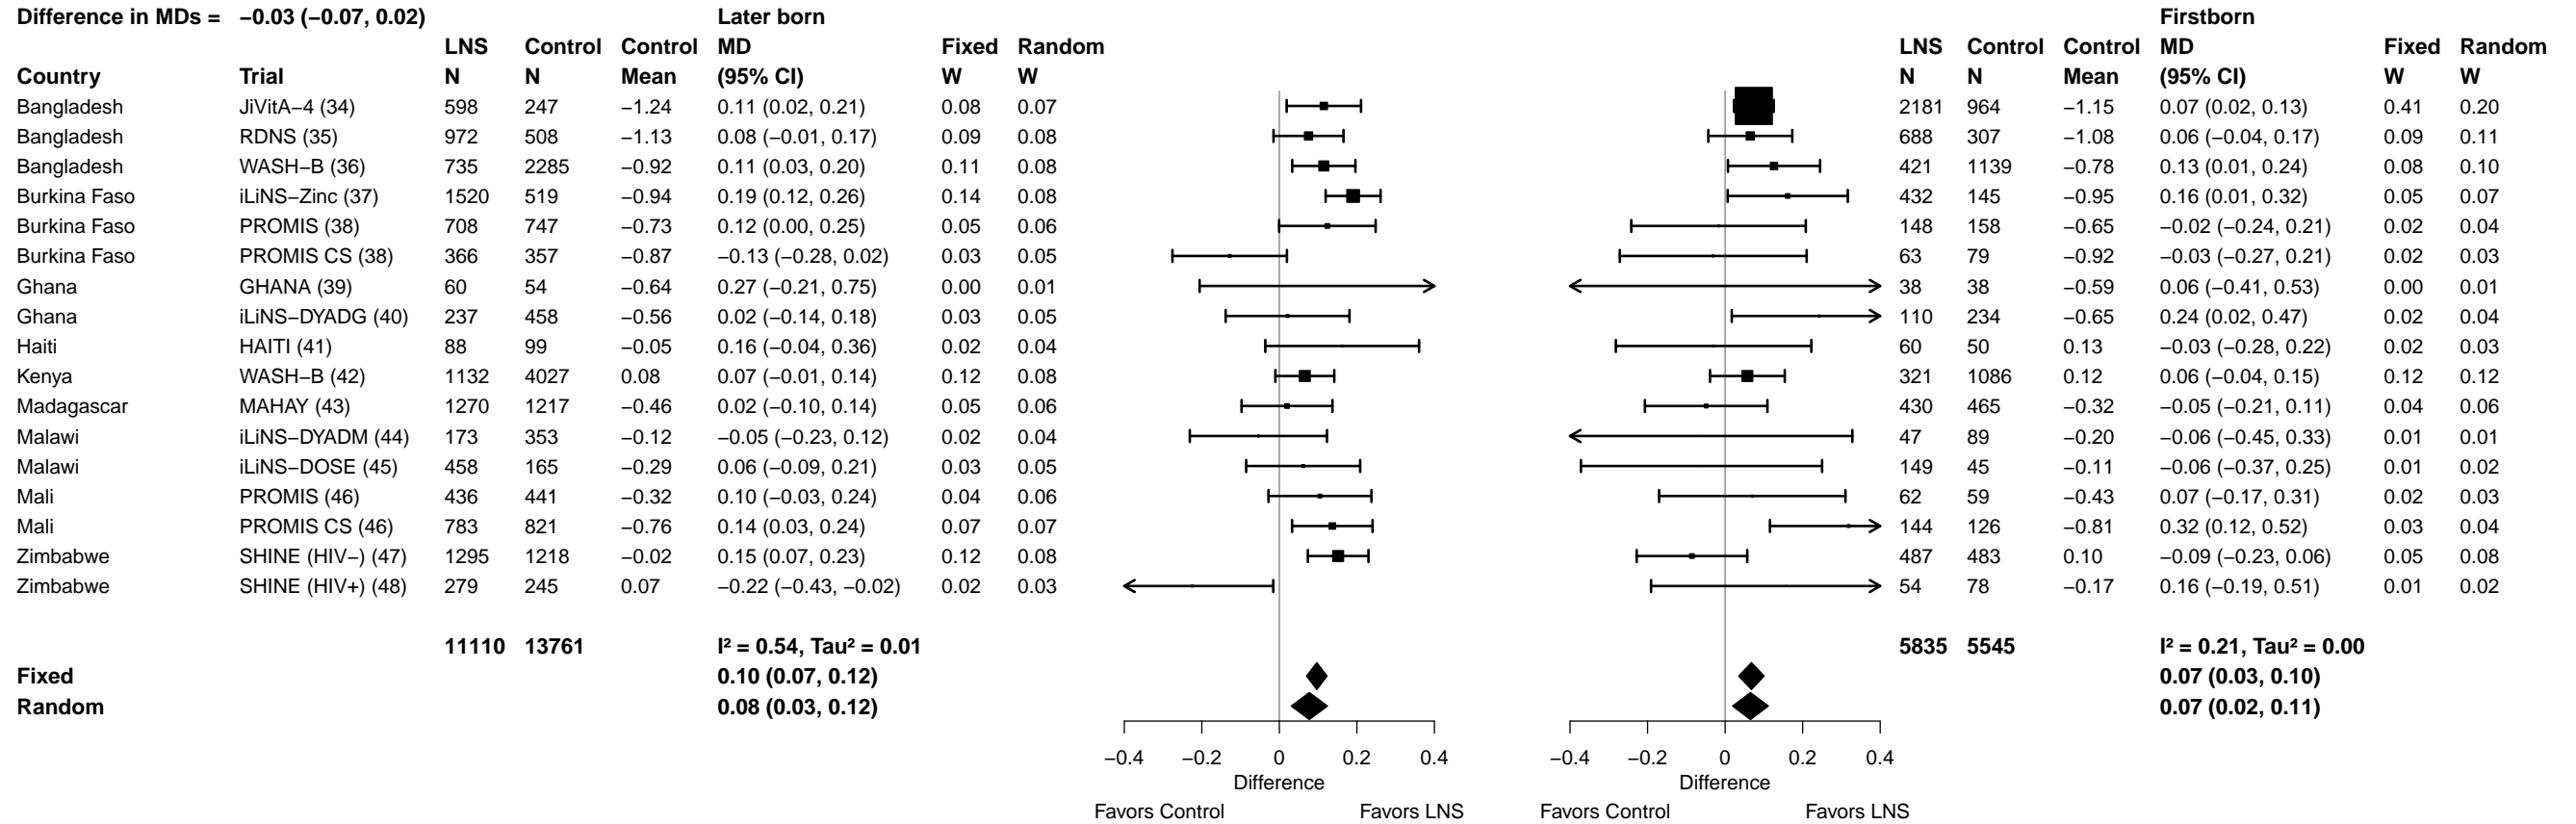

Supplemental figure 6D: Mean difference in WLZ

6D8: Stratified by Child baseline anthropometric status

P-for-interaction = 0.325

Difference in MDs = 0.03 (-0.03, 0.09)

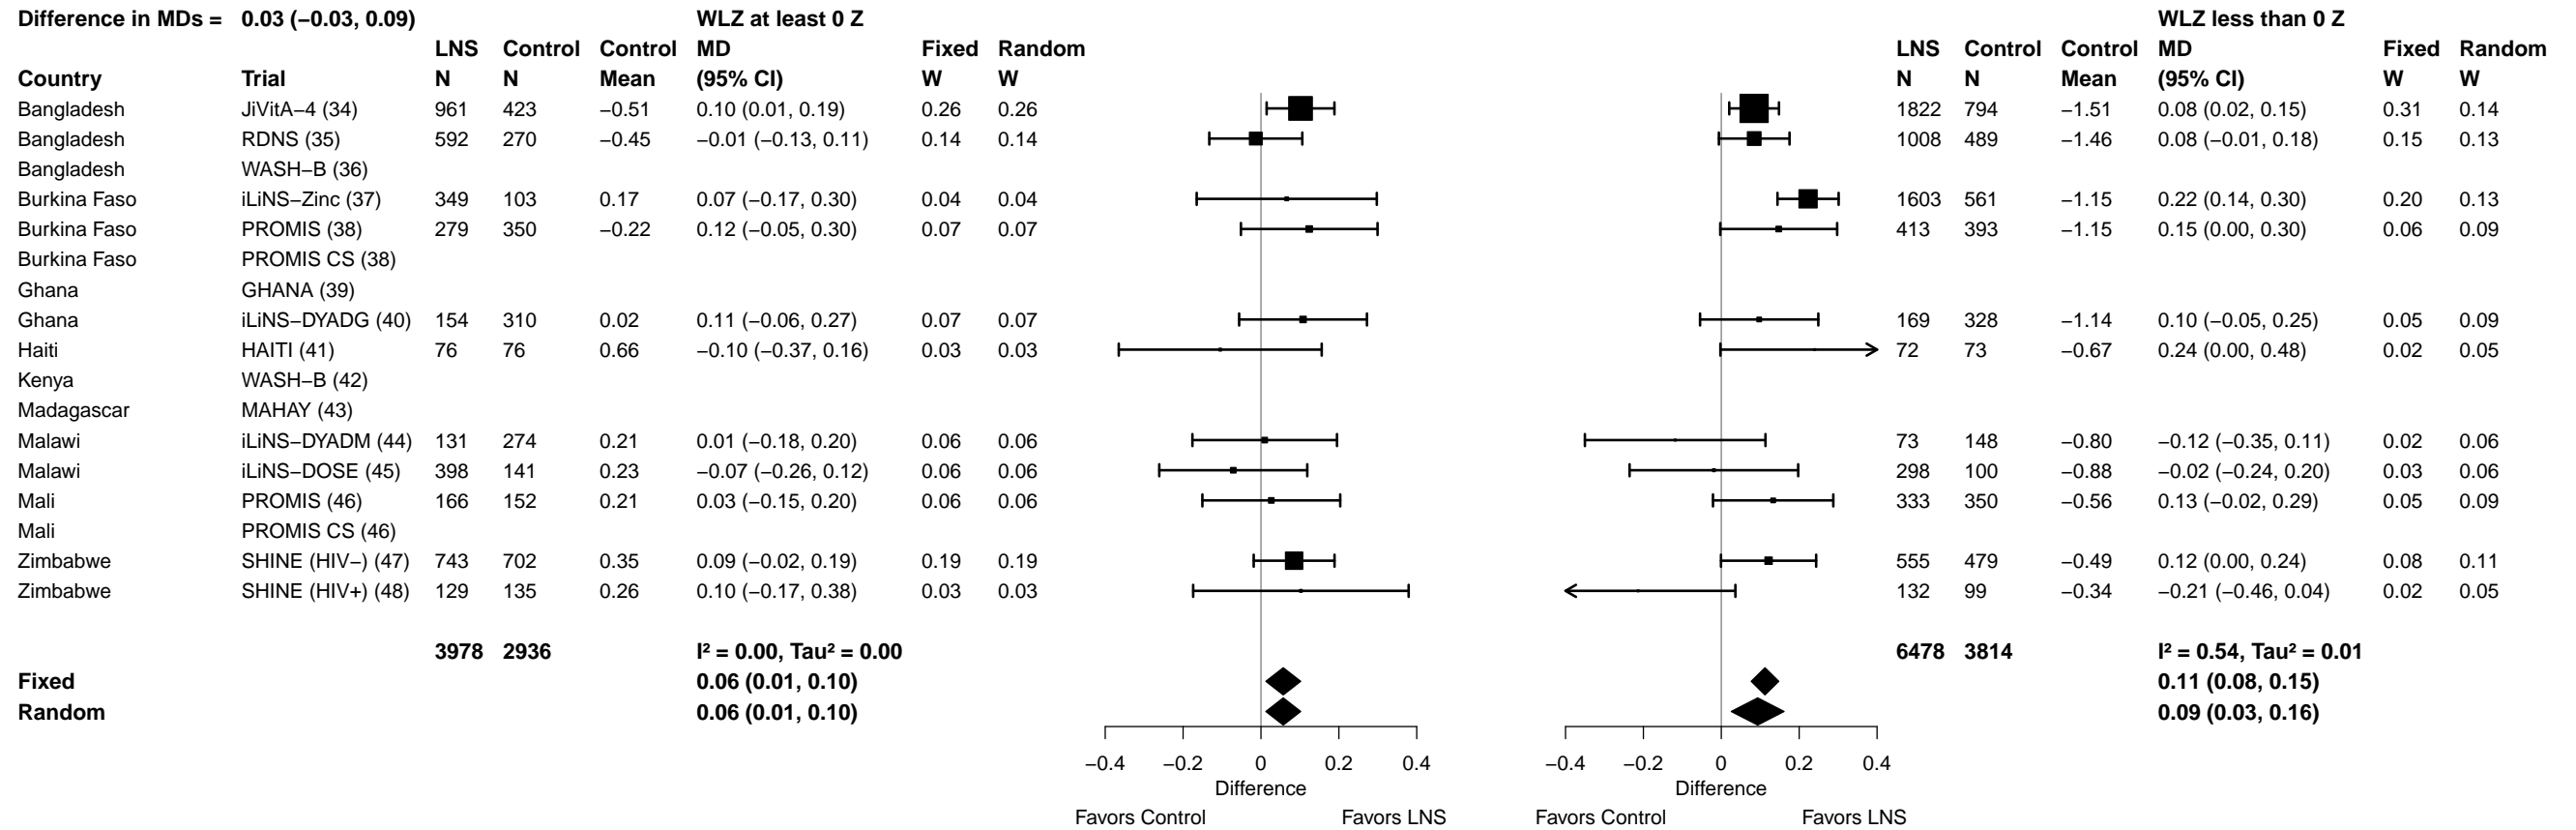

### Supplemental figure 6E: Wasting prevalence ratio

#### 6E1: Stratified by Maternal height

**P-for-interaction = 0.883**  
**Ratio of PRs = 1.02 (0.81, 1.28)**

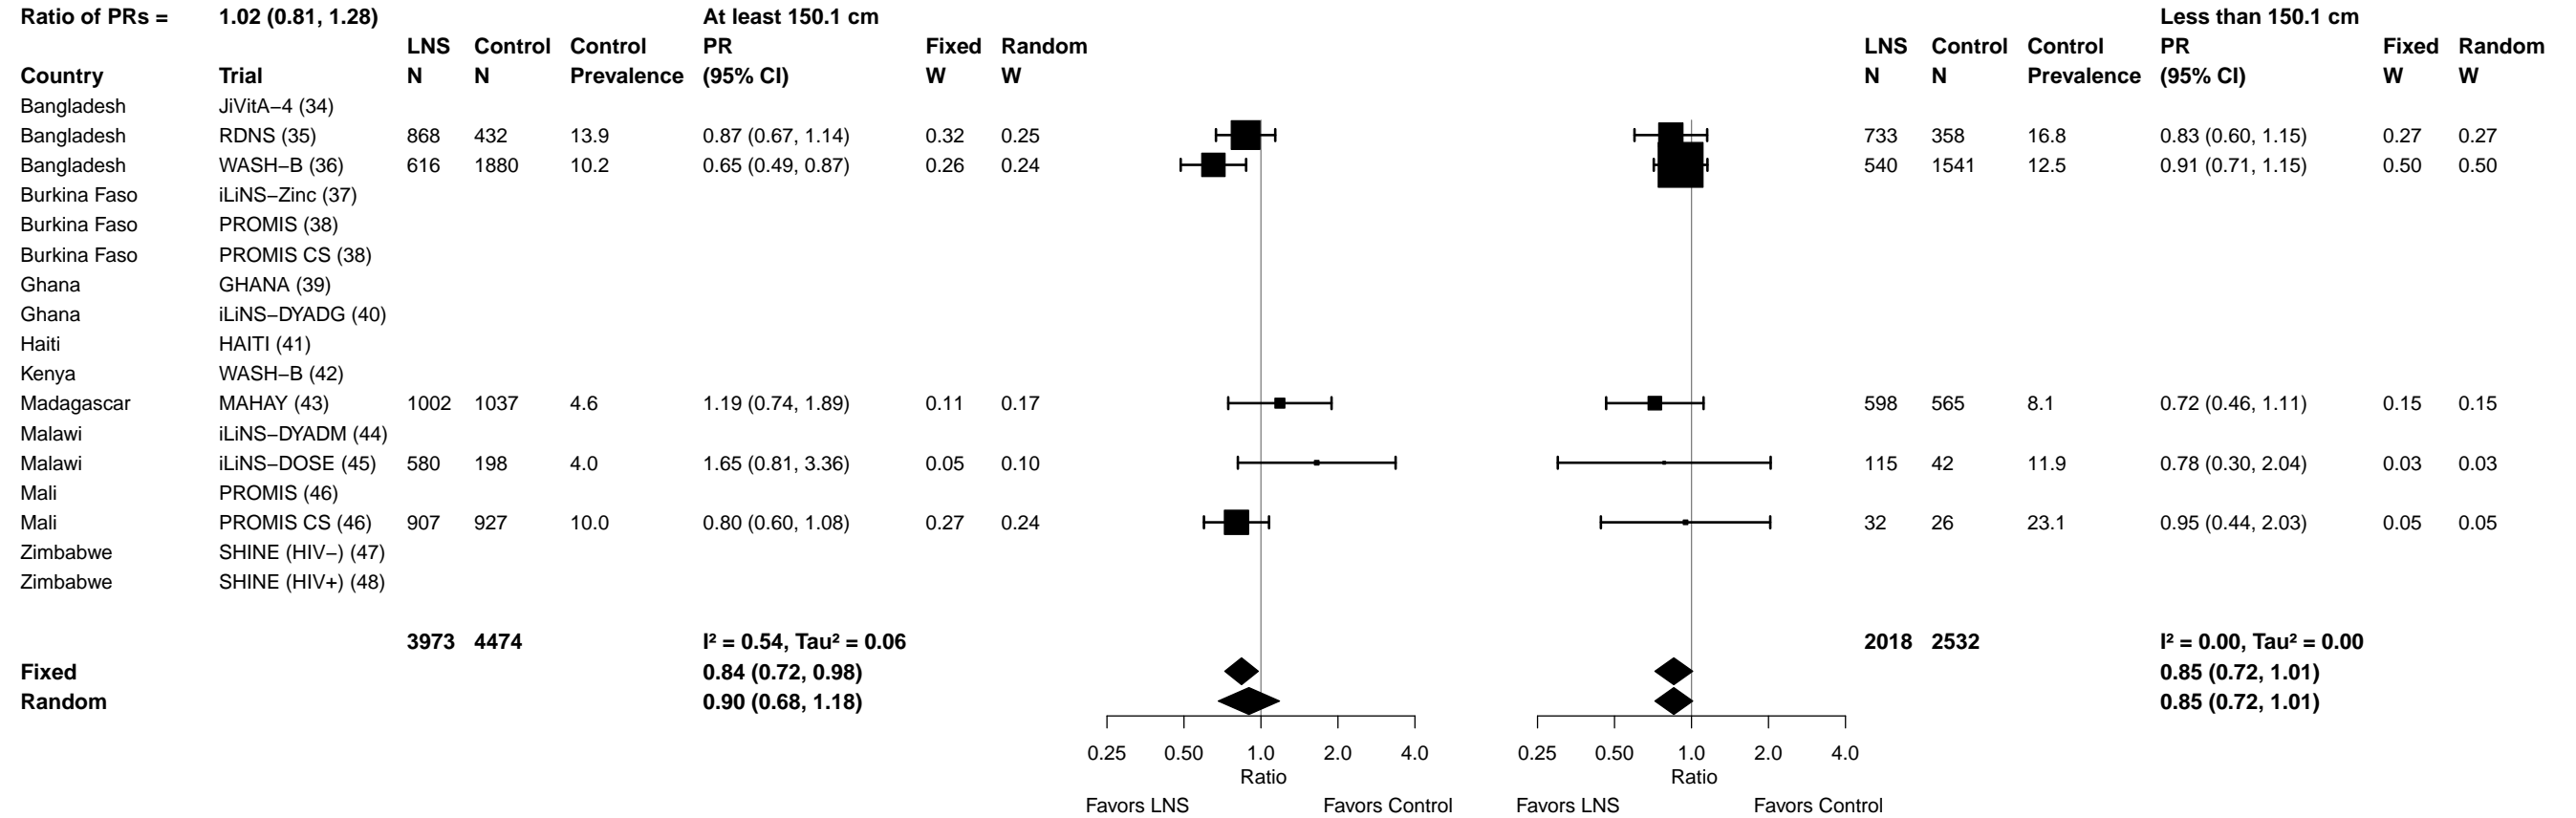



Supplemental figure 6E: Wasting prevalence ratio

6E3: Stratified by Maternal age

P-for-interaction = 0.707

Ratio of PRs = 1.03 (0.88, 1.22)

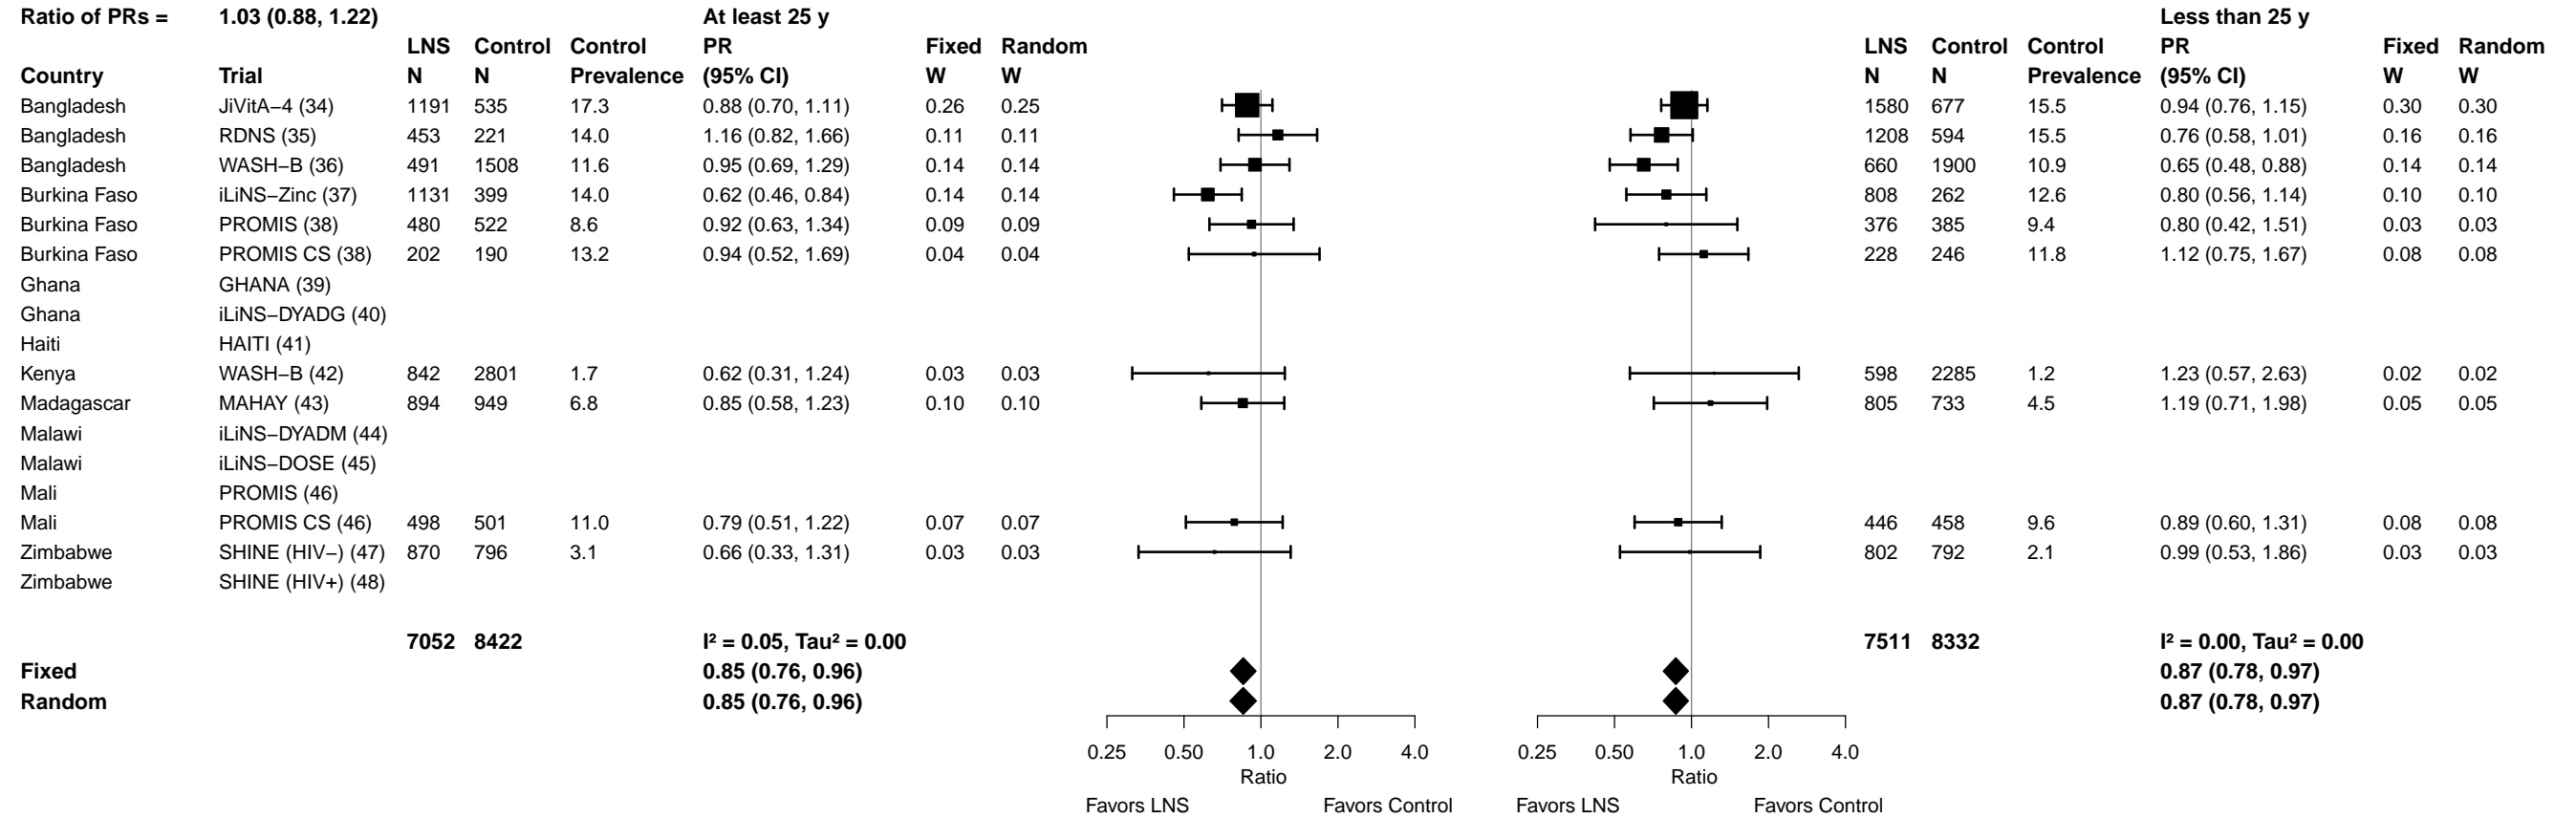



Supplemental figure 6E: Wasting prevalence ratio

6E4: Stratified by Maternal education

P-for-interaction = 0.890

Ratio of PRs = 1.01 (0.83, 1.23)

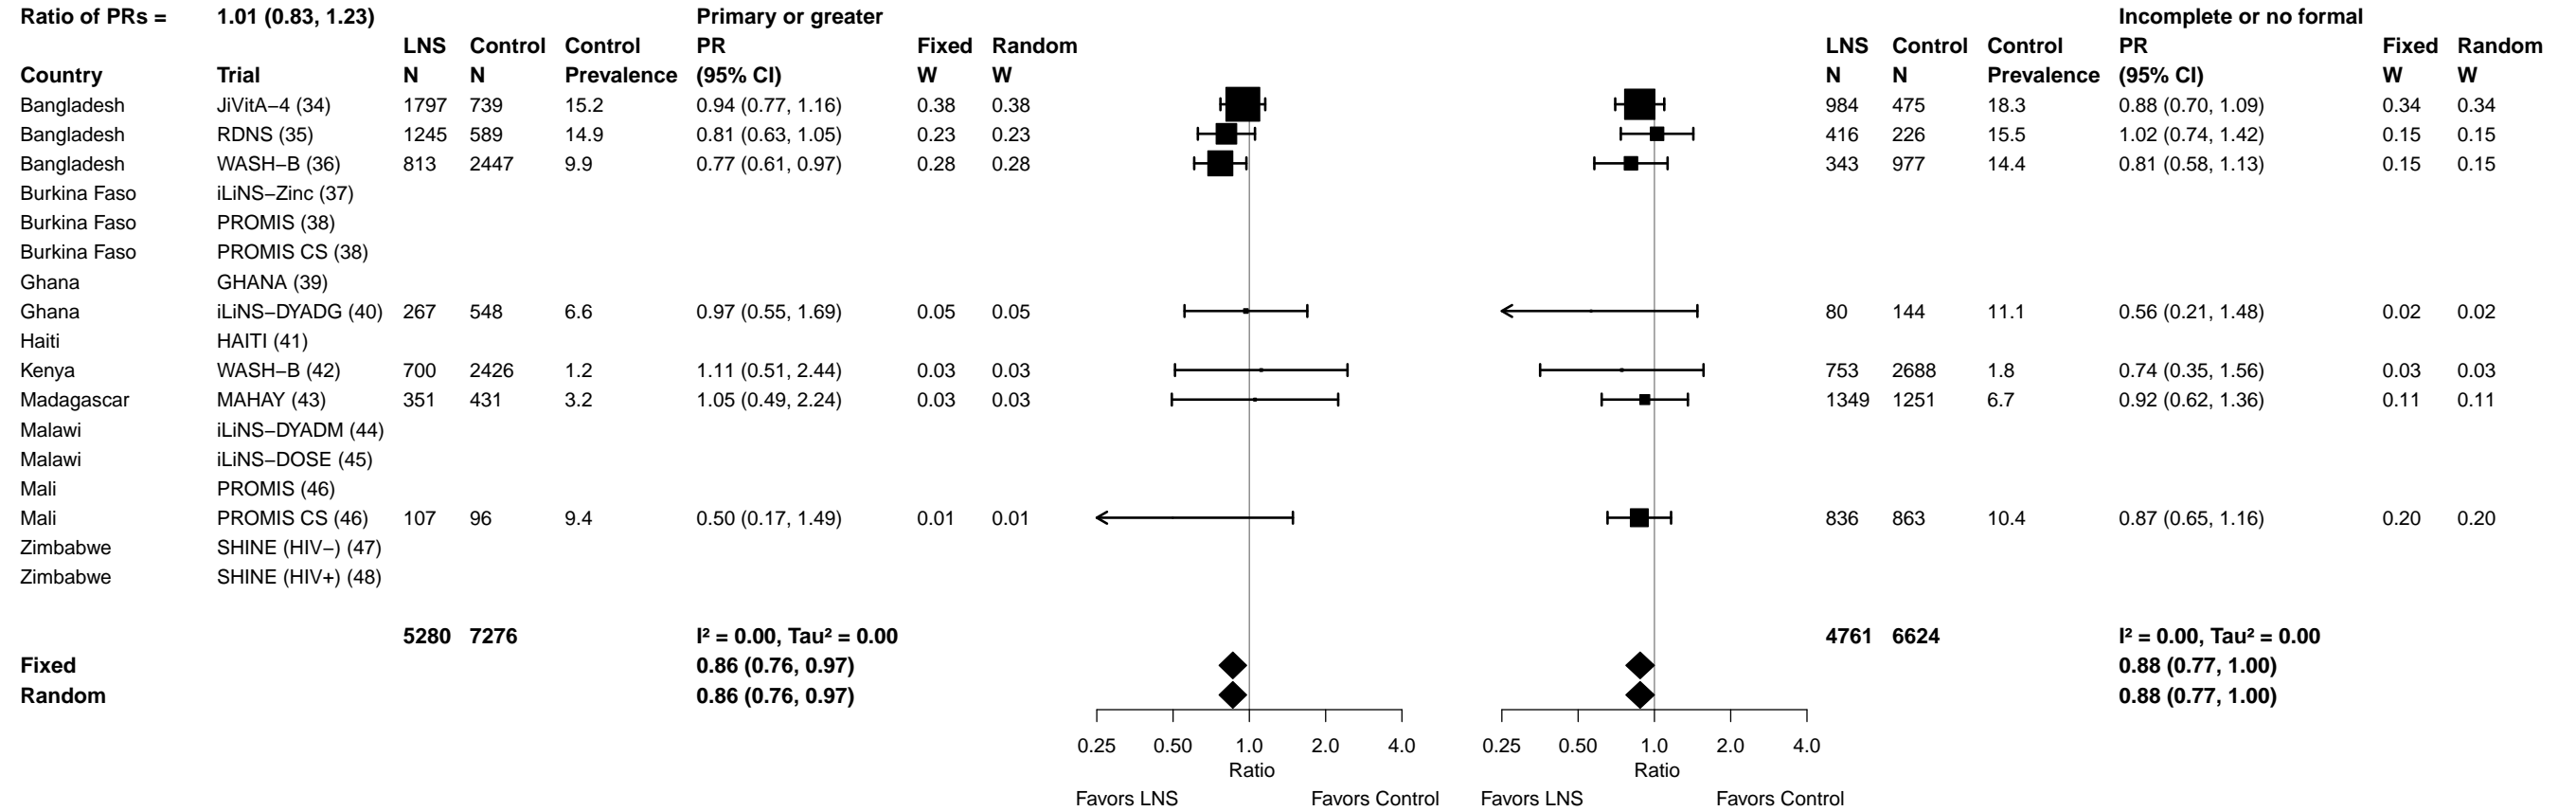

Supplemental figure 6E: Wasting prevalence ratio

6E5: Stratified by Maternal depressive symptoms

P-for-interaction = 0.265

Ratio of PRs = 1.15 (0.90, 1.48)

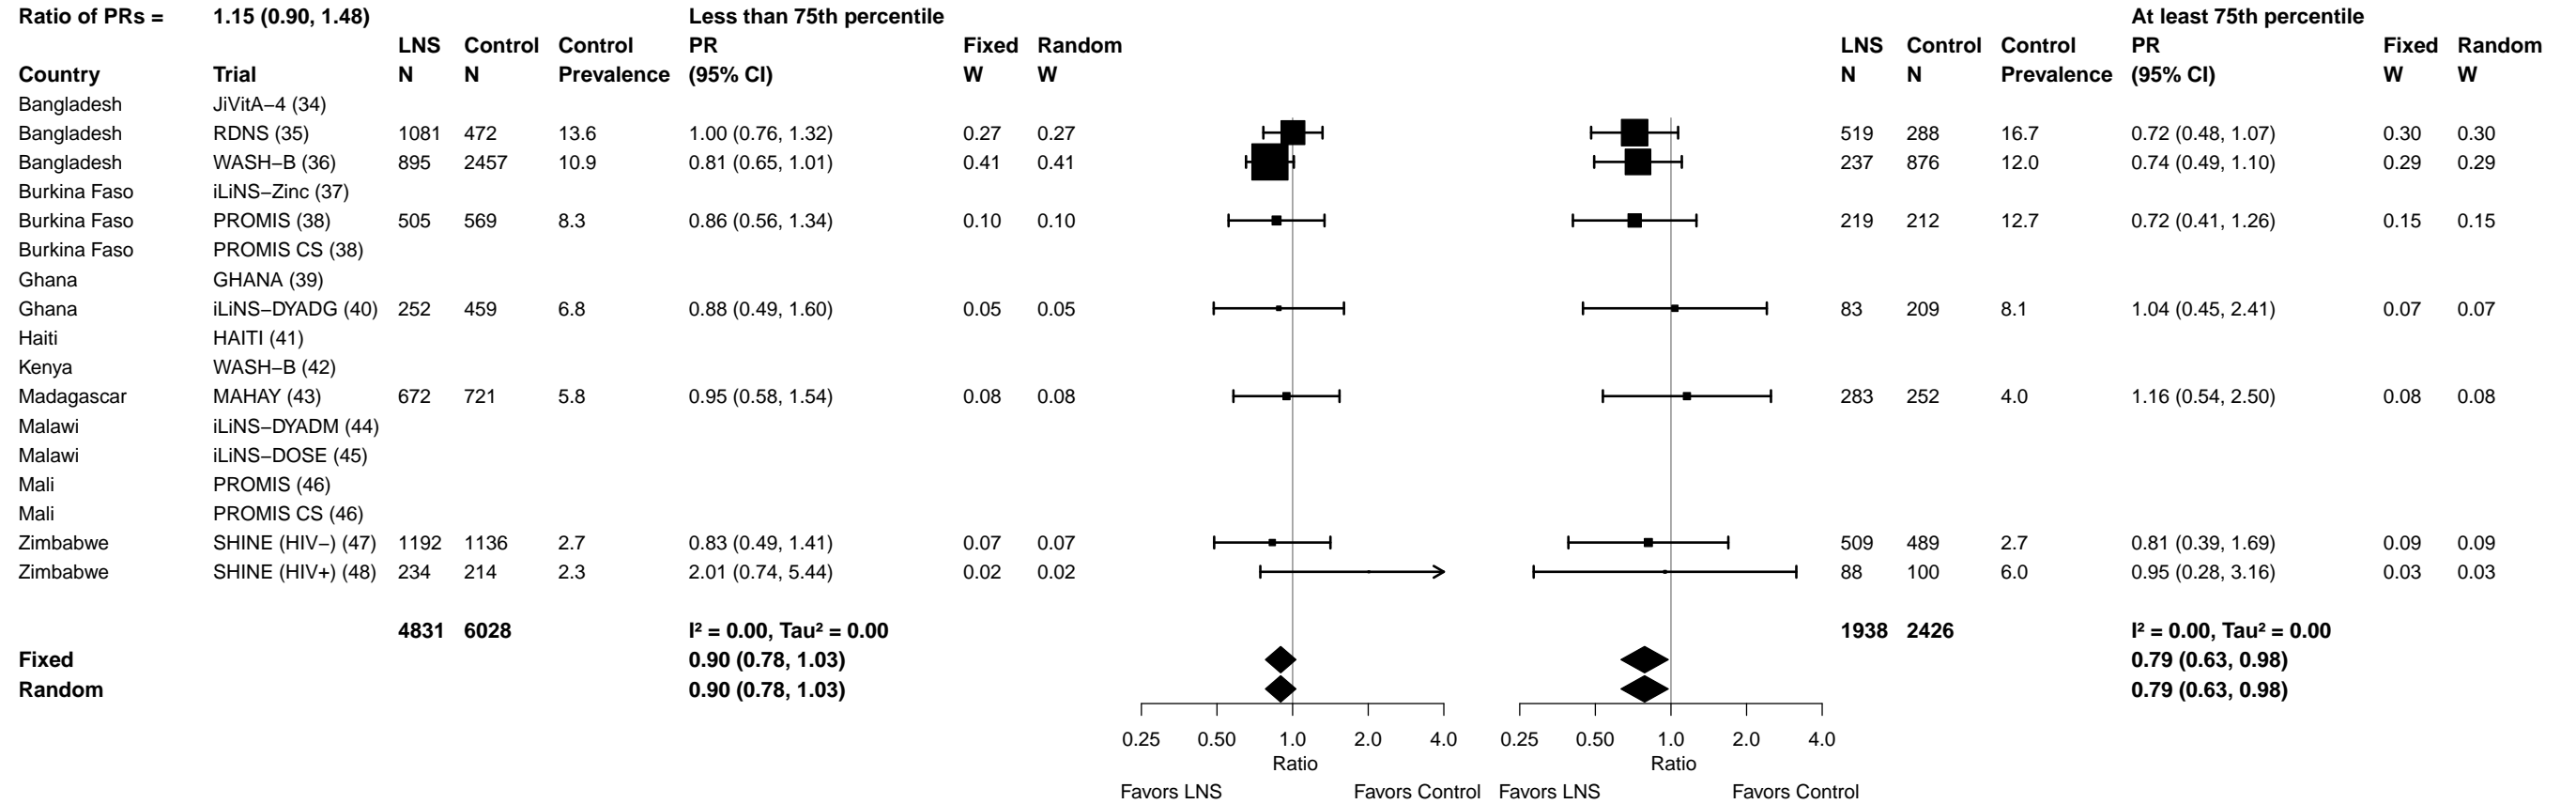

Supplemental figure 6E: Wasting prevalence ratio

6E6: Stratified by Child sex

P-for-interaction = 0.074

Ratio of PRs = 0.87 (0.75, 1.01)

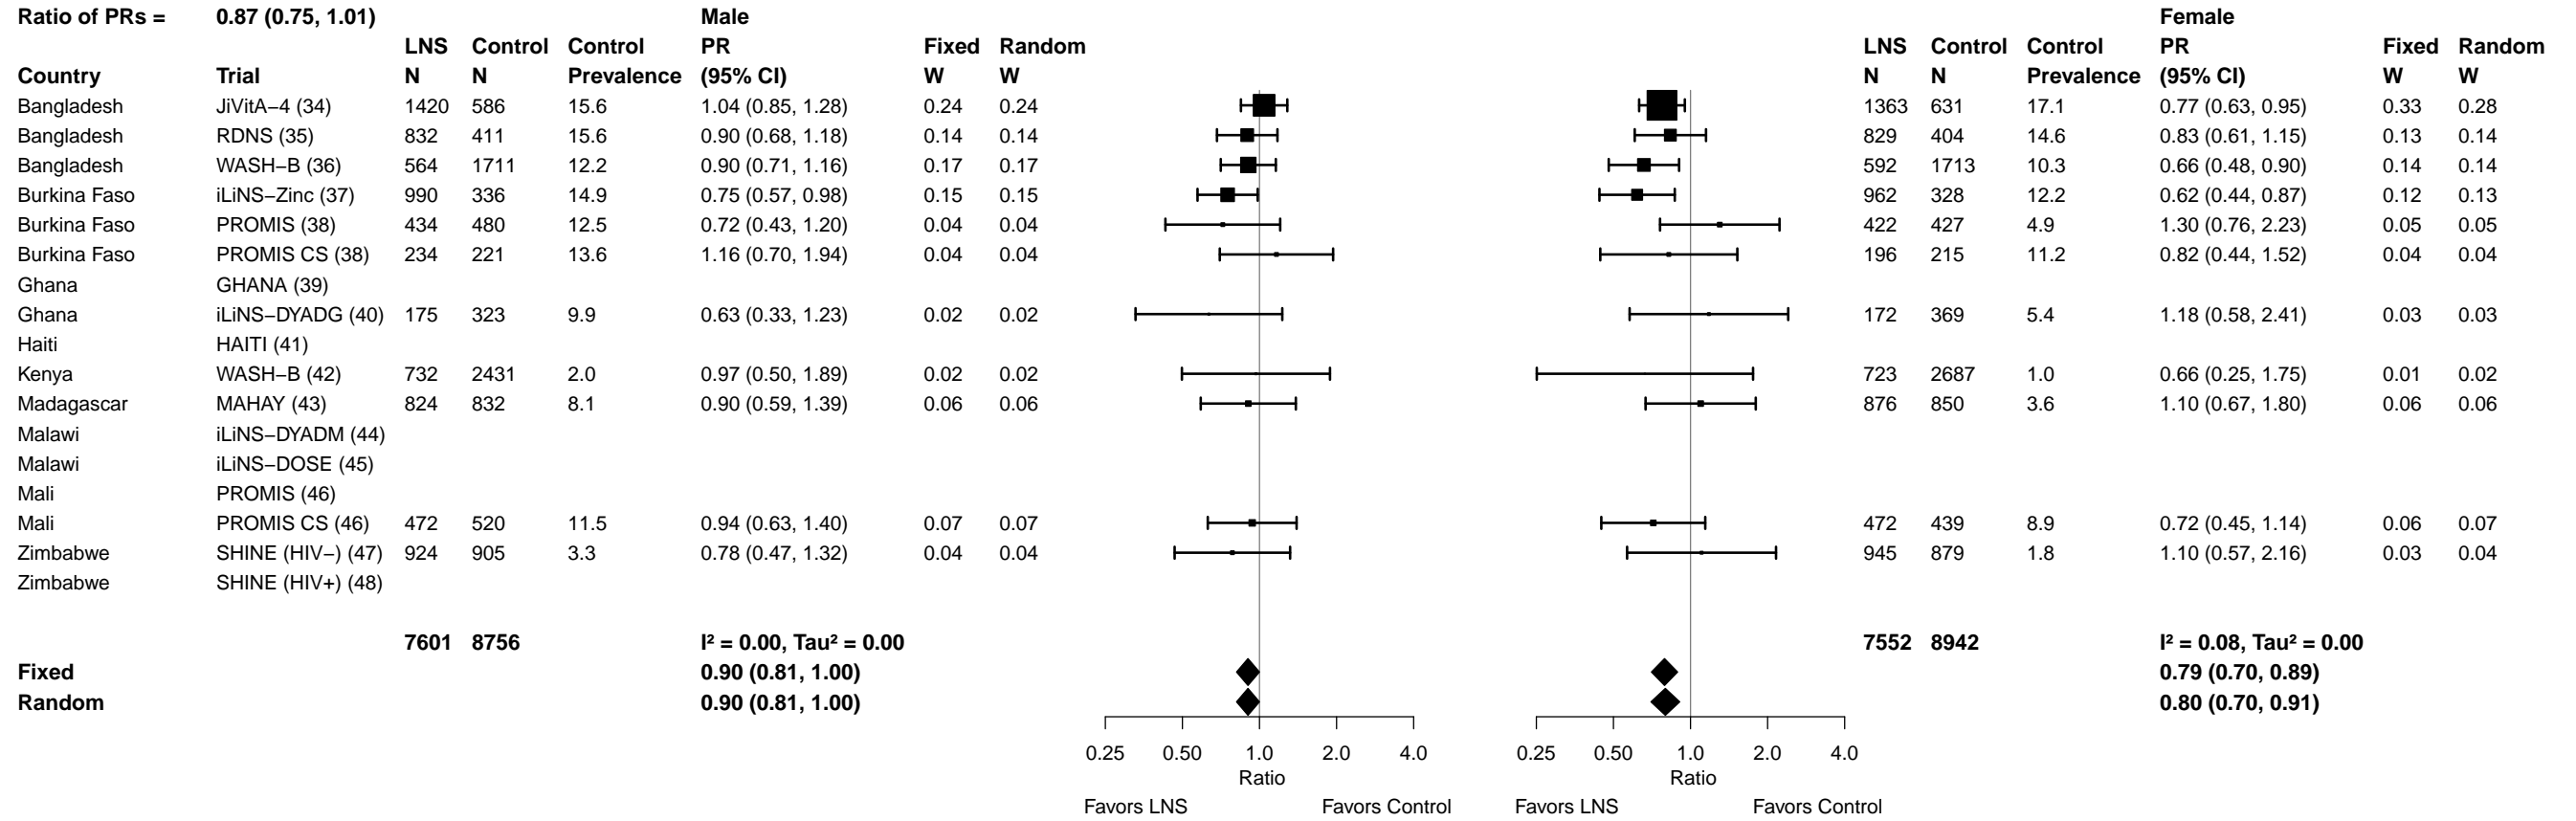

Supplemental figure 6E: Wasting prevalence ratio

6E7: Stratified by Child birth order

P-for-interaction = 0.609

Ratio of PRs = 1.05 (0.88, 1.25)

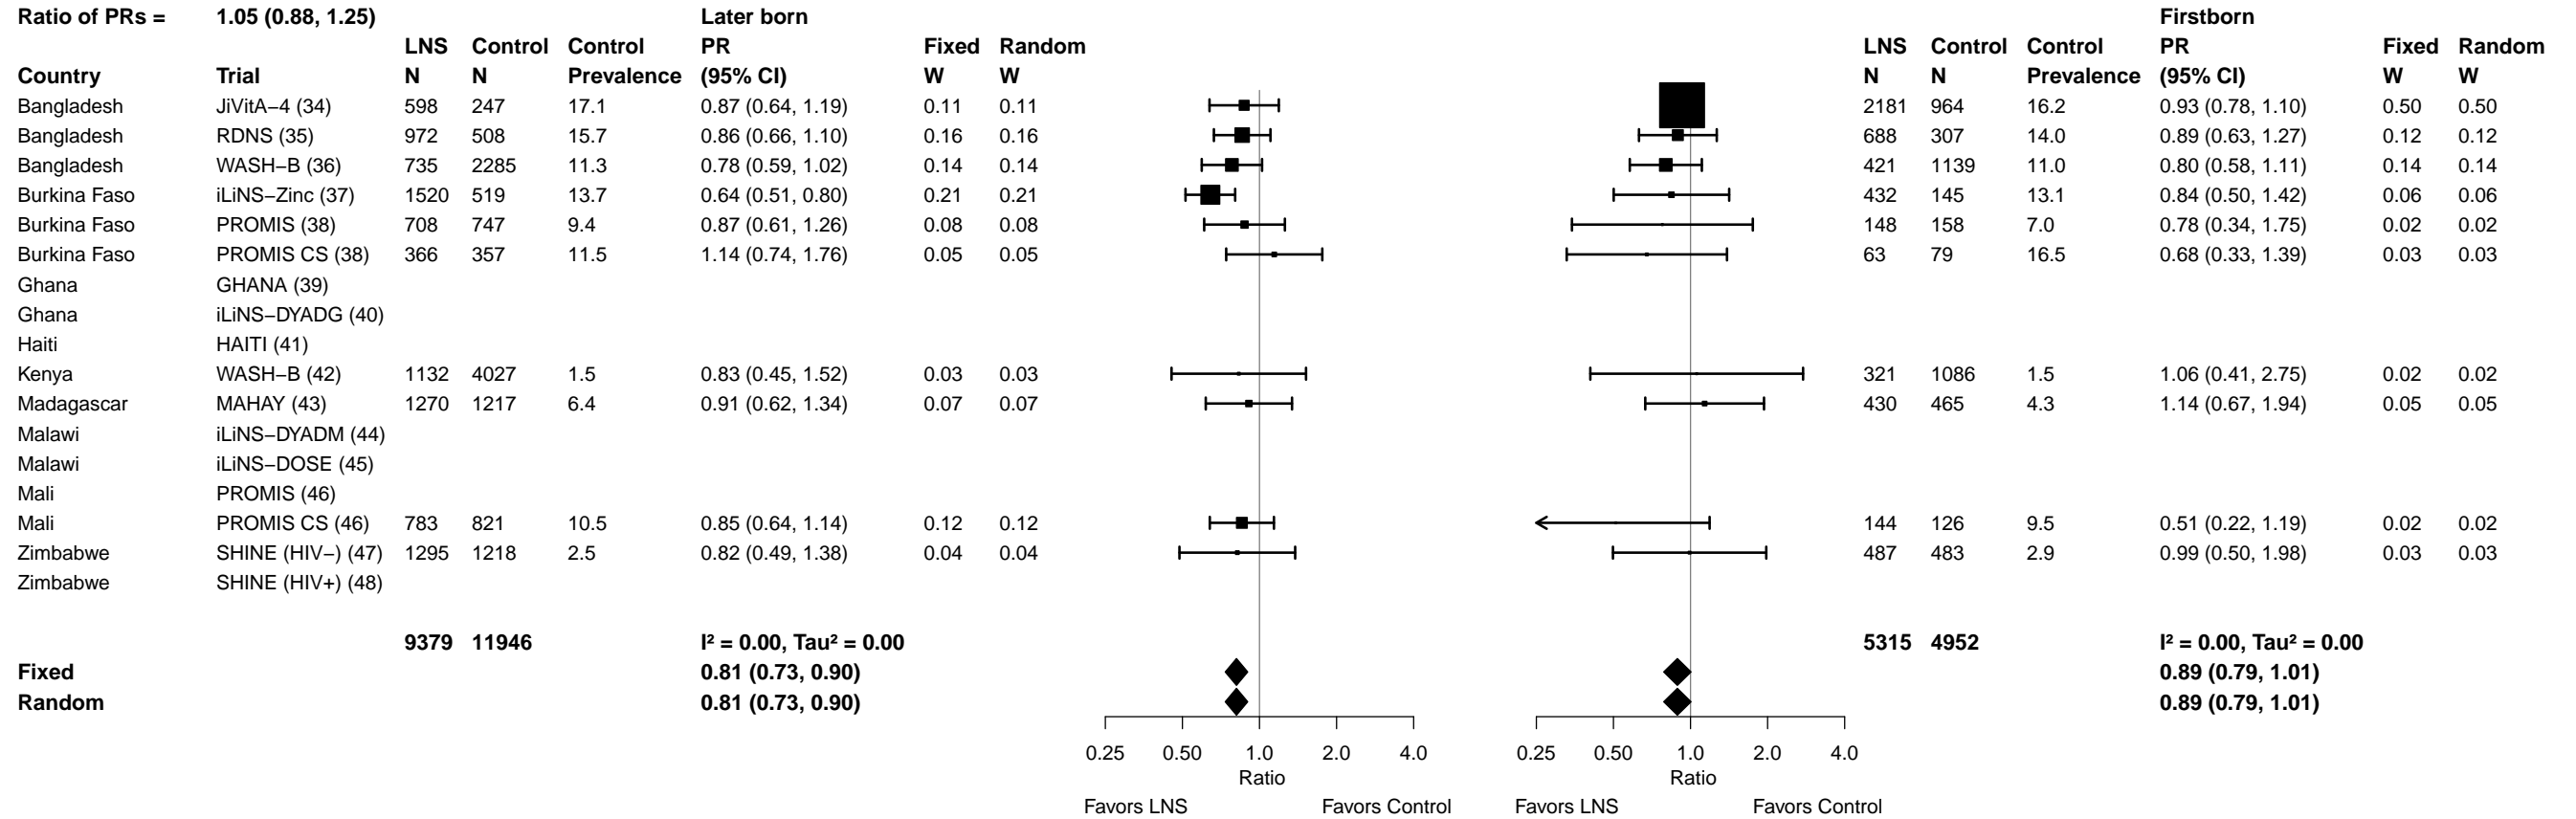



### Supplemental figure 6F: Wasting prevalence difference

#### 6F1: Stratified by Maternal height

P-for-interaction = 0.438

Difference in PDs = -0.01 (-0.03, 0.01)

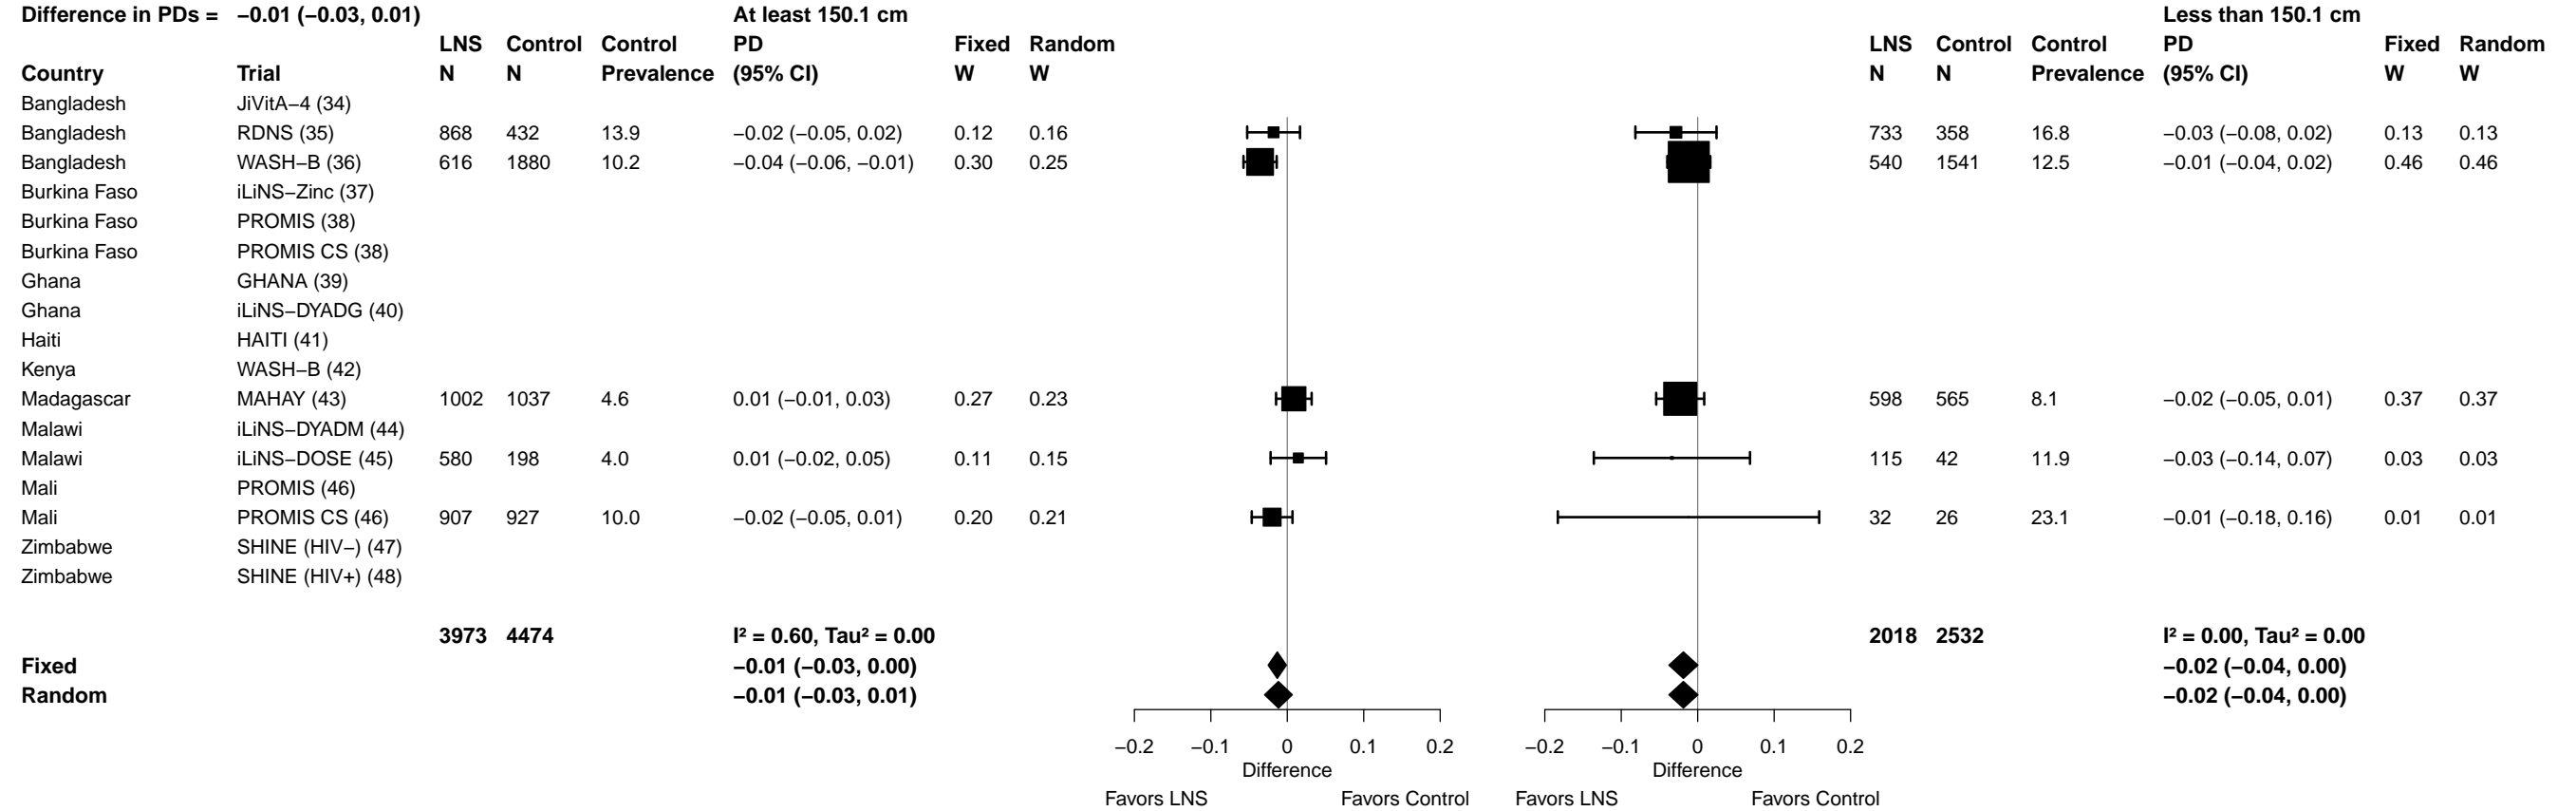



Supplemental figure 6F: Wasting prevalence difference

6F3: Stratified by Maternal age

P-for-interaction = 0.171  
 Difference in PDs = 0.01 (0.00, 0.02)

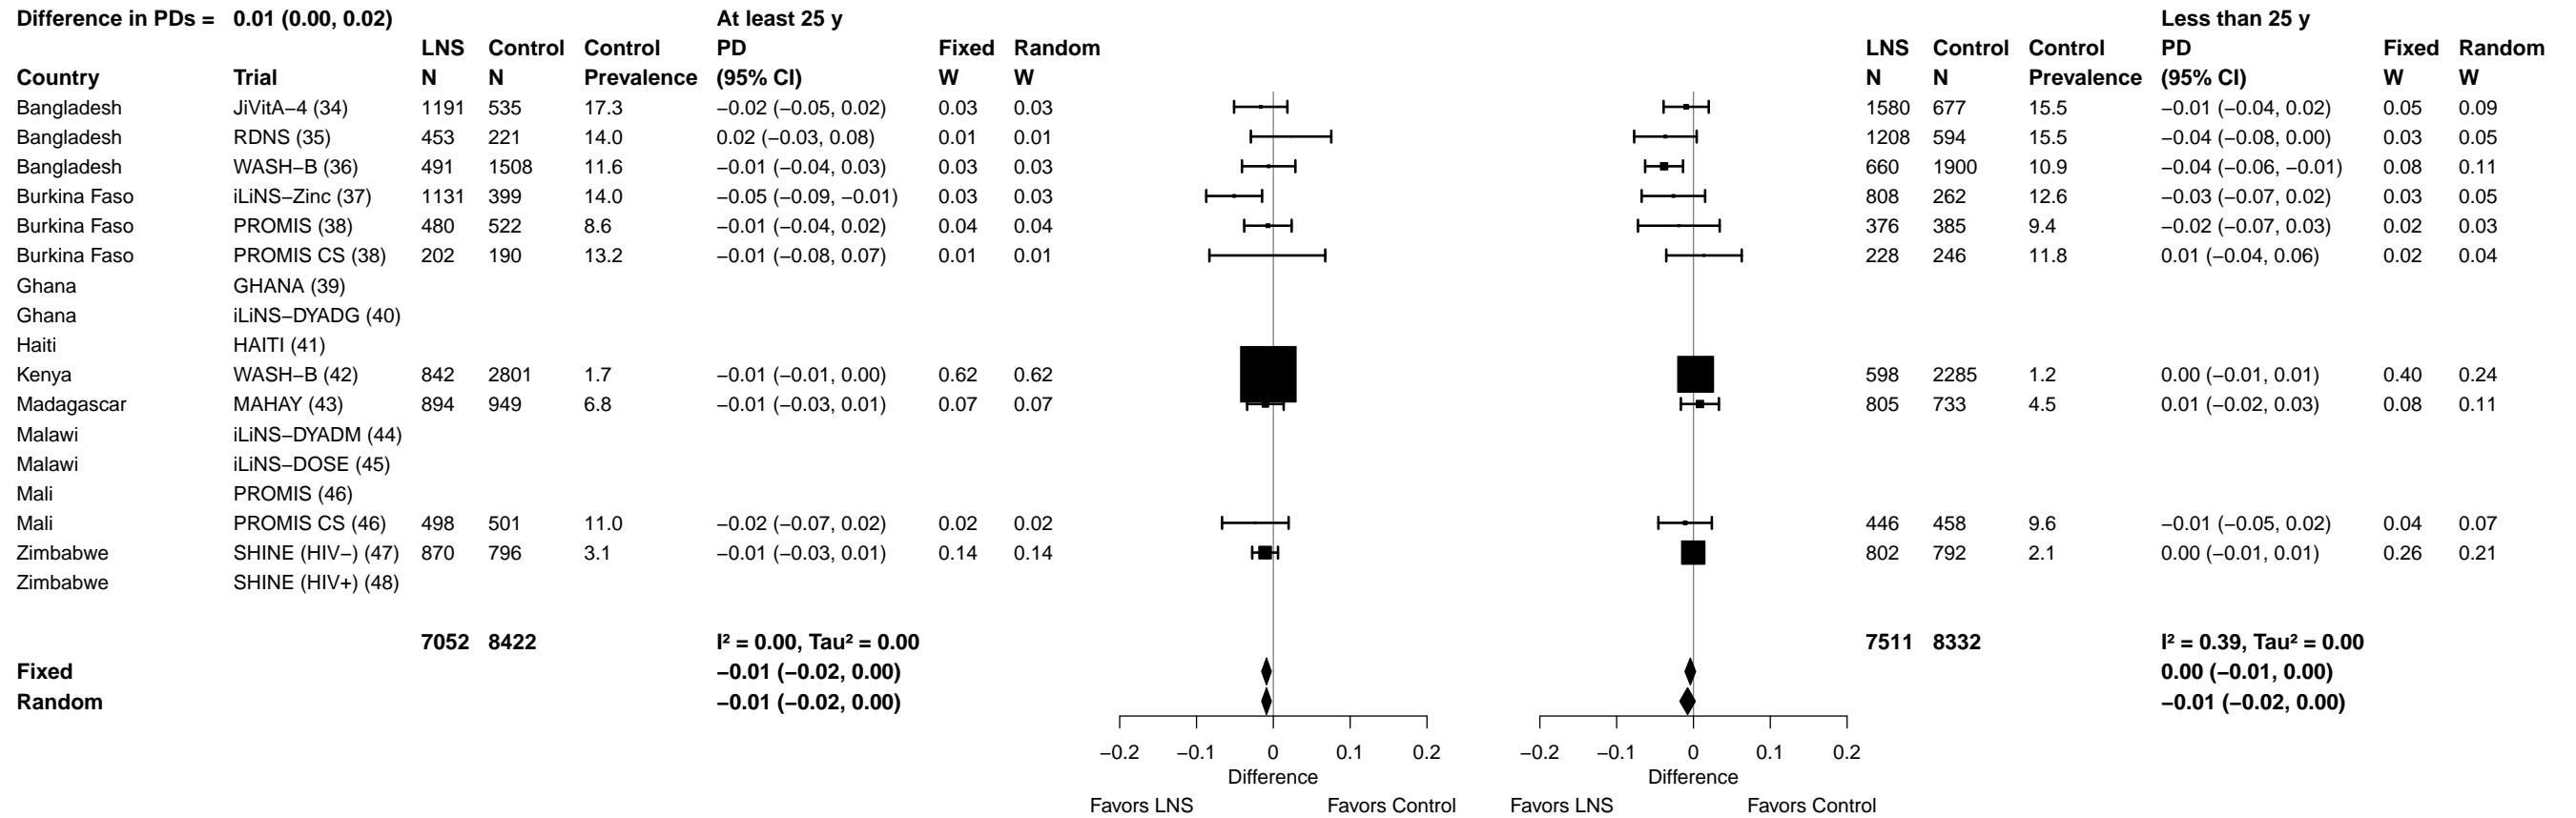



Supplemental figure 6F: Wasting prevalence difference

6F4: Stratified by Maternal education

P-for-interaction = 0.380

Difference in PDs = -0.01 (-0.02, 0.01)

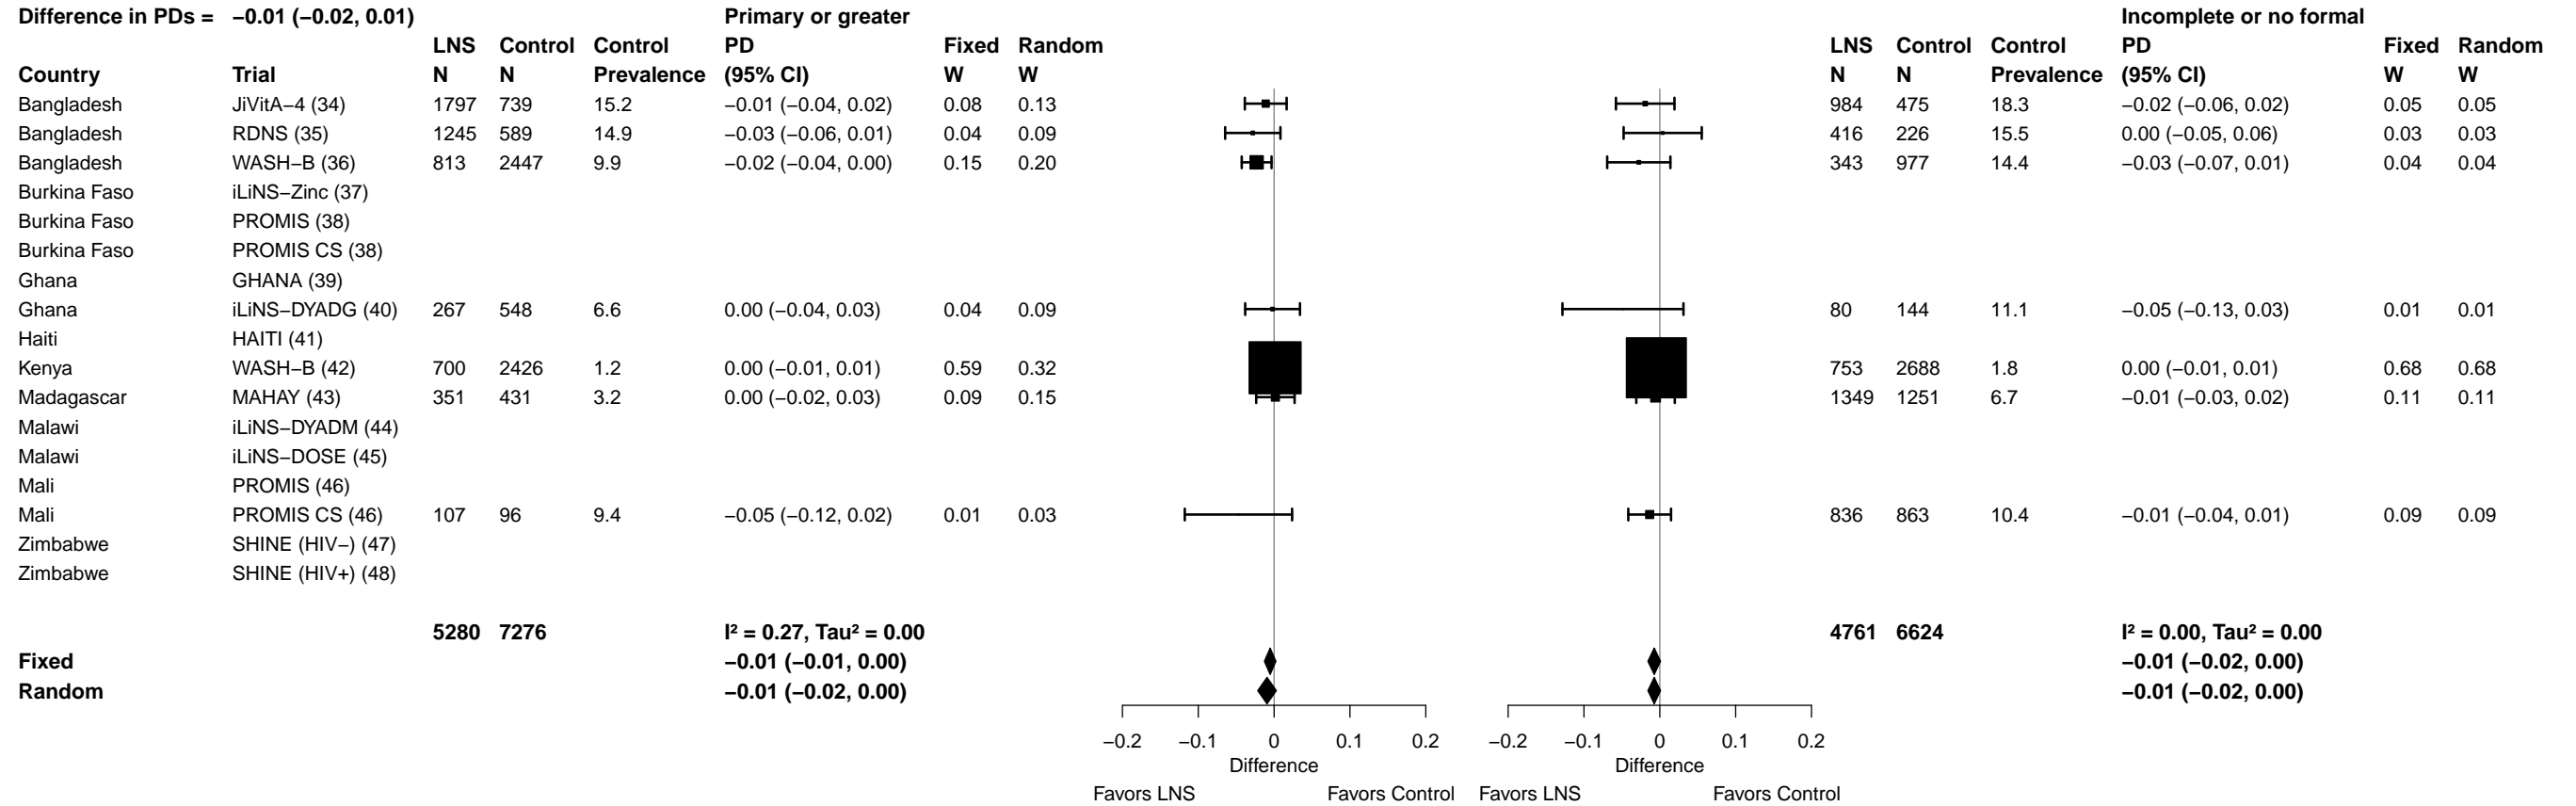

Supplemental figure 6F: Wasting prevalence difference

6F5: Stratified by Maternal depressive symptoms

$I^2$ -for-interaction = 0.511

Difference in PDs = 0.01 (-0.01, 0.02)

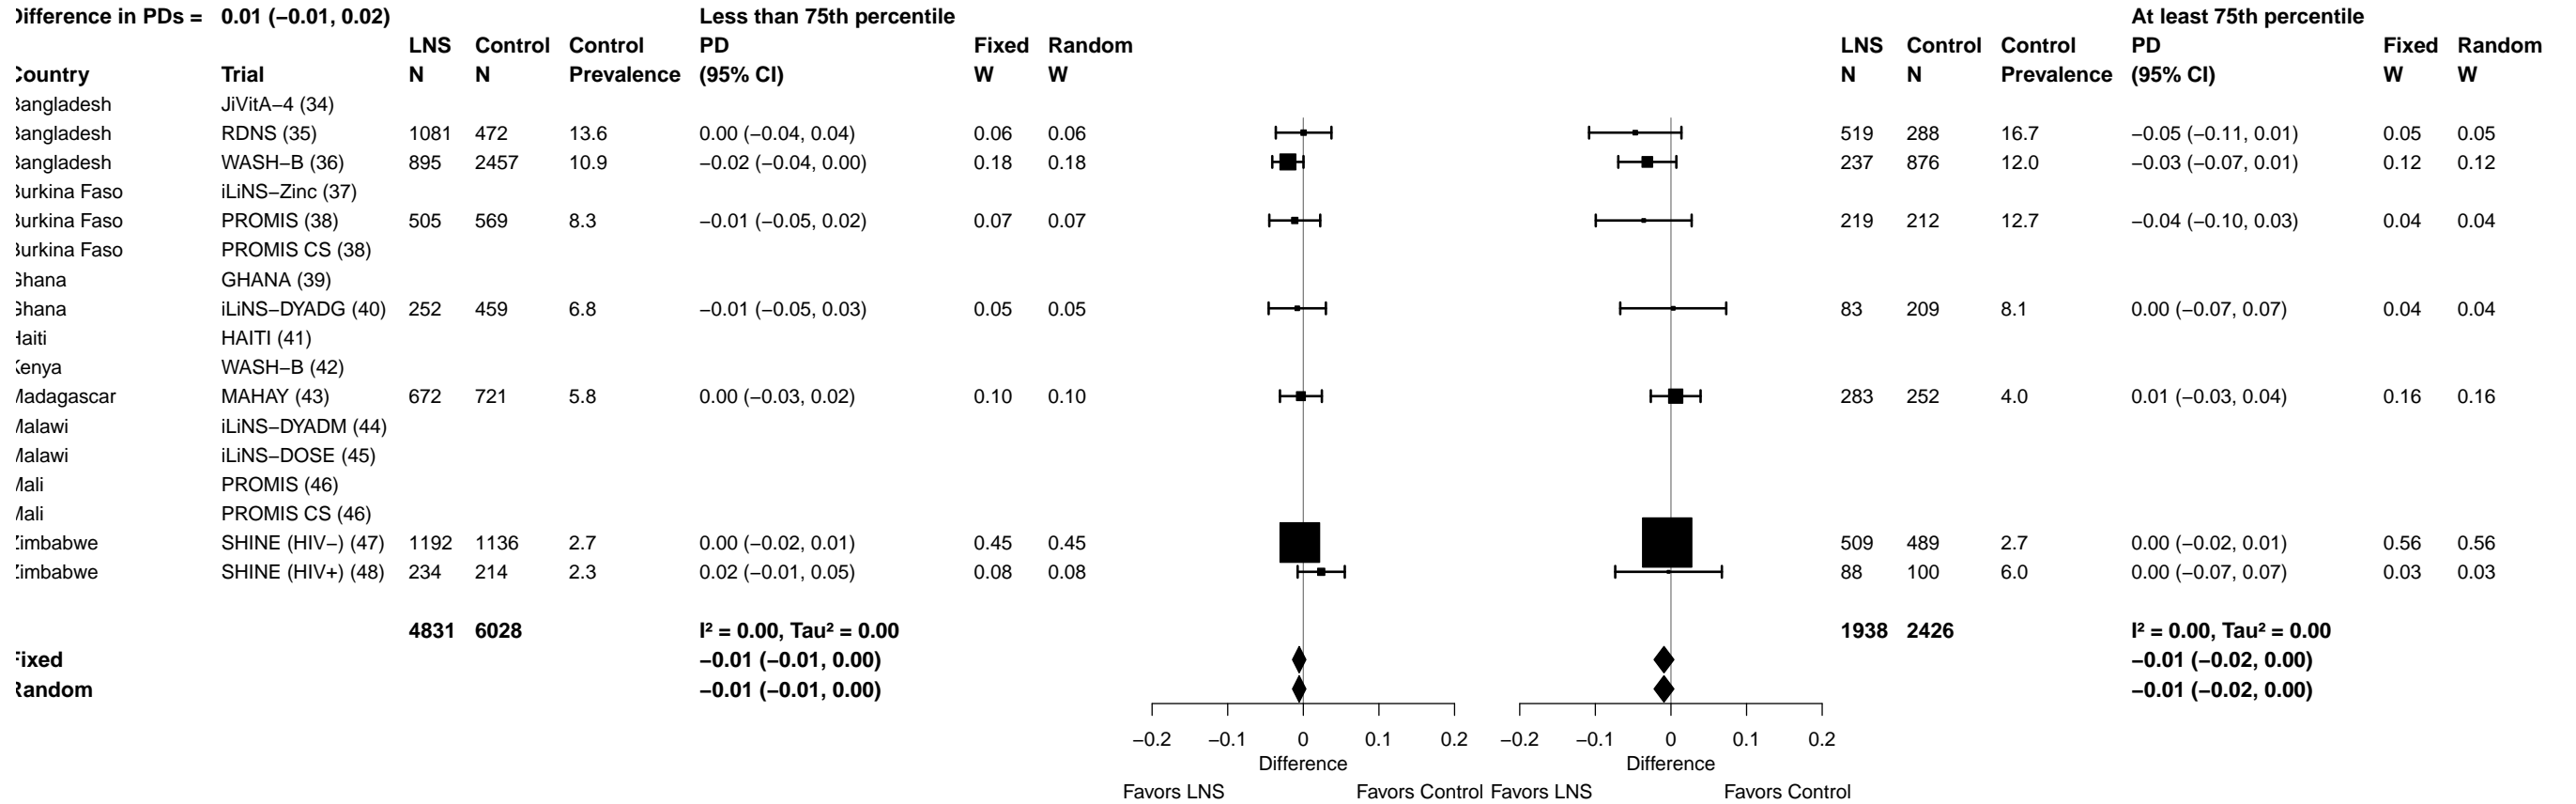

Supplemental figure 6F: Wasting prevalence difference

6F6: Stratified by Child sex

P-for-interaction = 0.876

Difference in PDs = 0.00 (-0.01, 0.01)

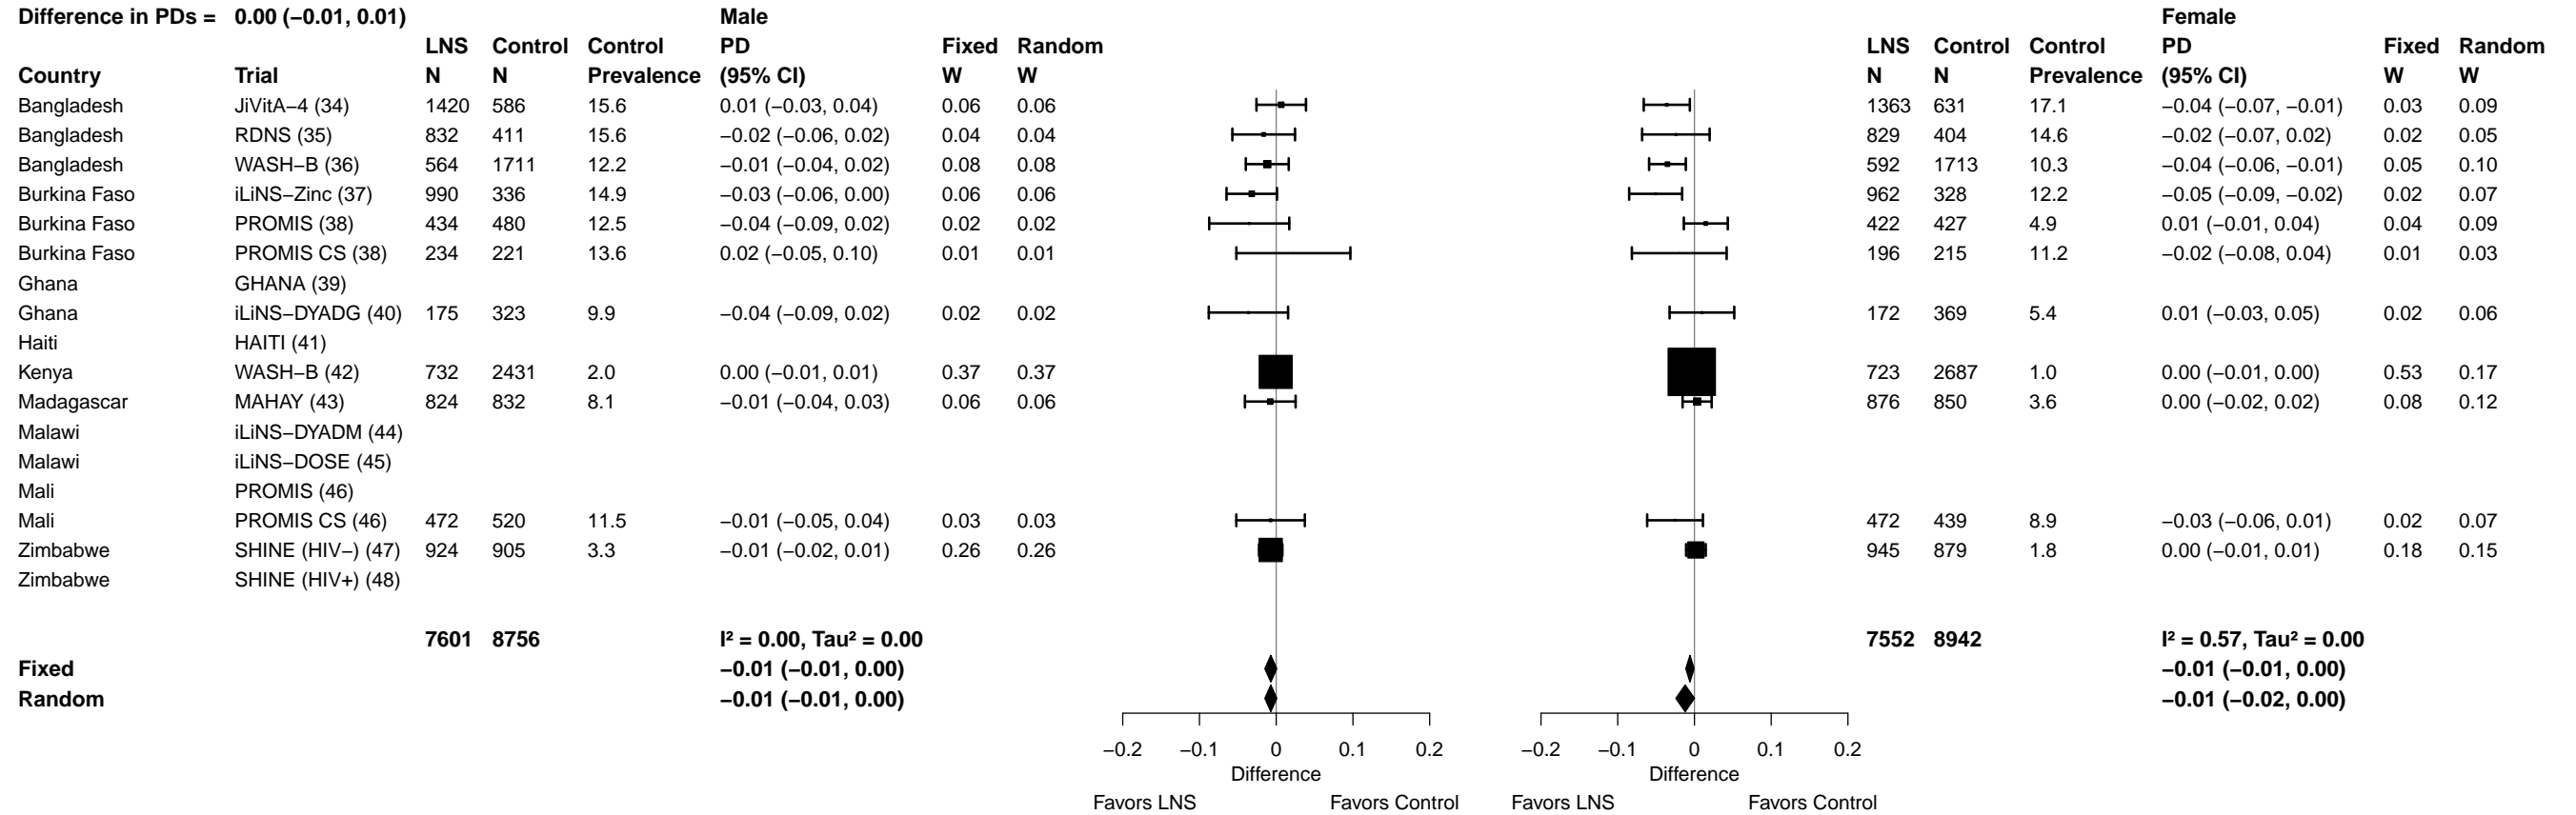

Supplemental figure 6F: Wasting prevalence difference

6F7: Stratified by Child birth order

P-for-interaction = 0.549

Difference in PDs = 0.00 (-0.01, 0.01)

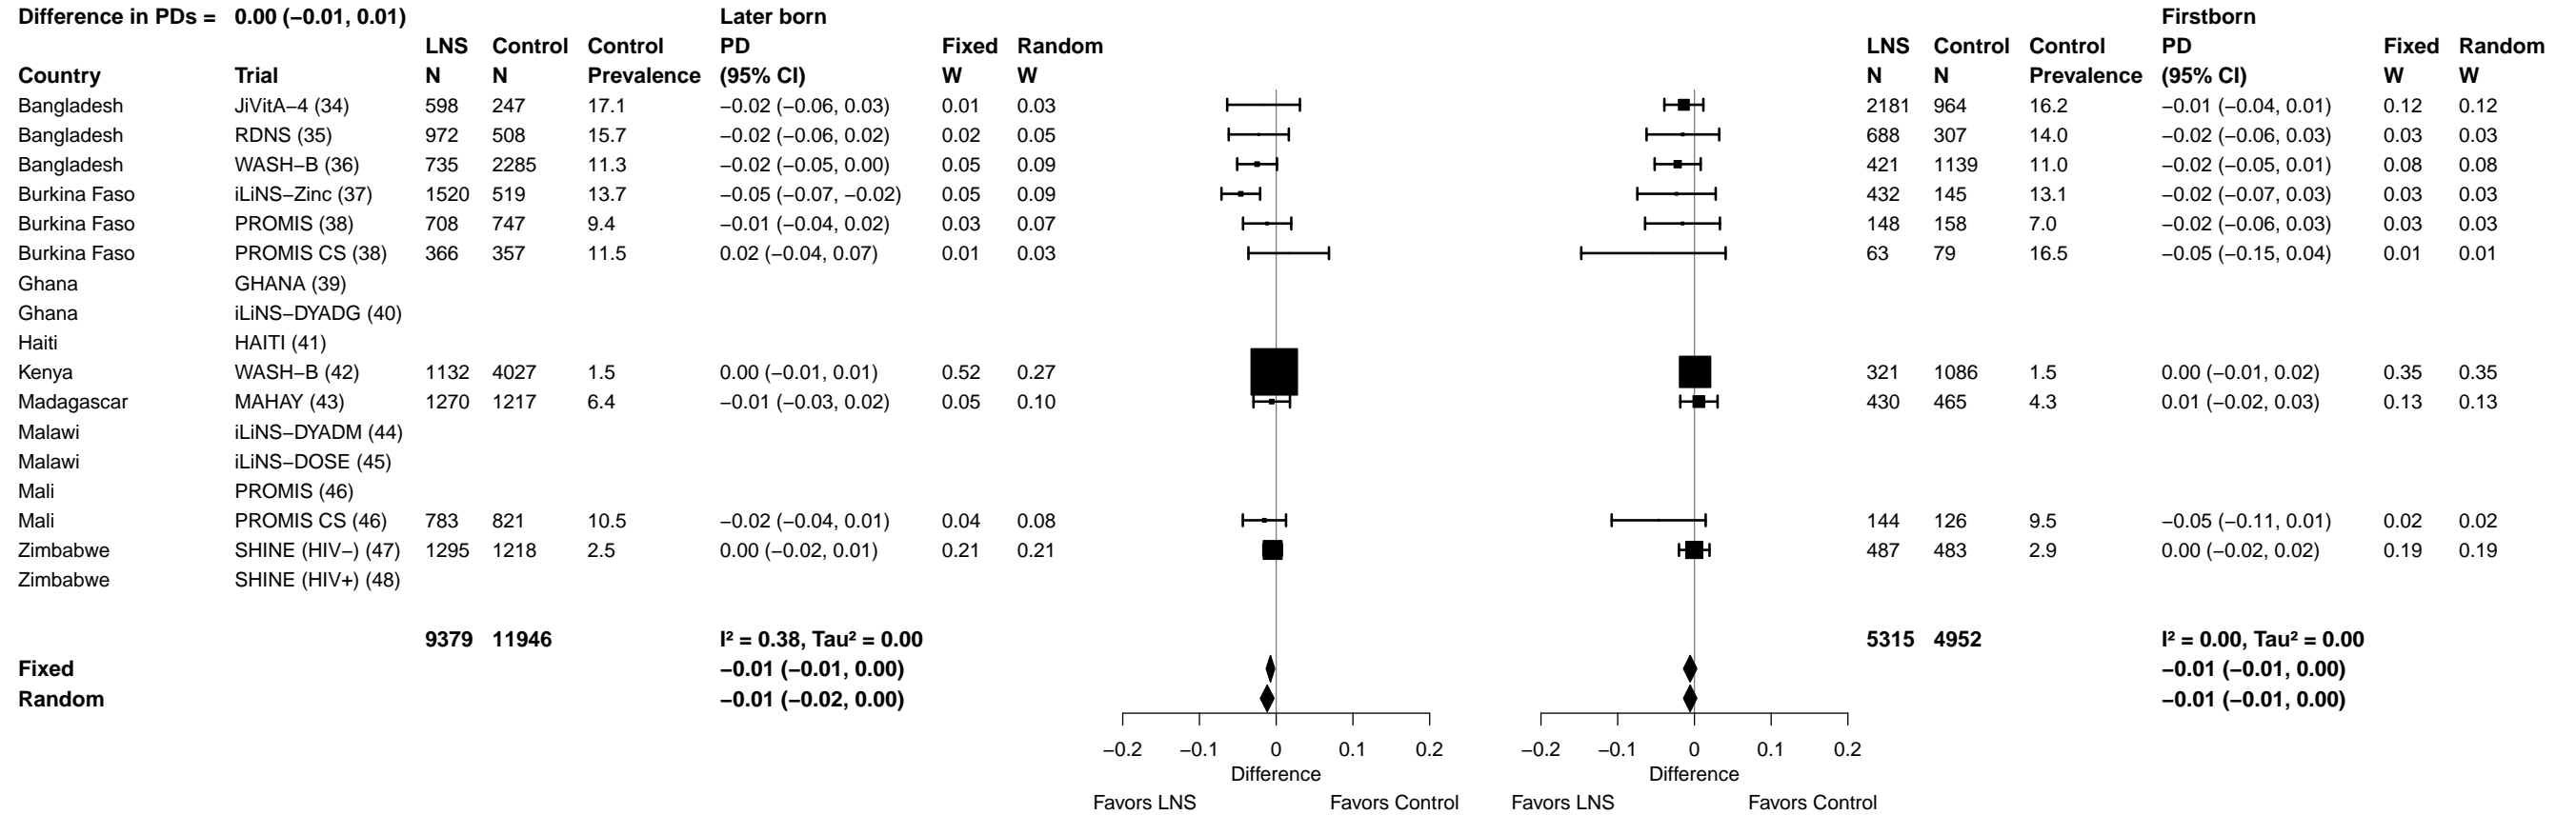

Supplemental figure 6F: Wasting prevalence difference

6F8: Stratified by Child baseline anthropometric status

P-for-interaction = 0.062

Difference in PDs = -0.02 (-0.04, 0.00)

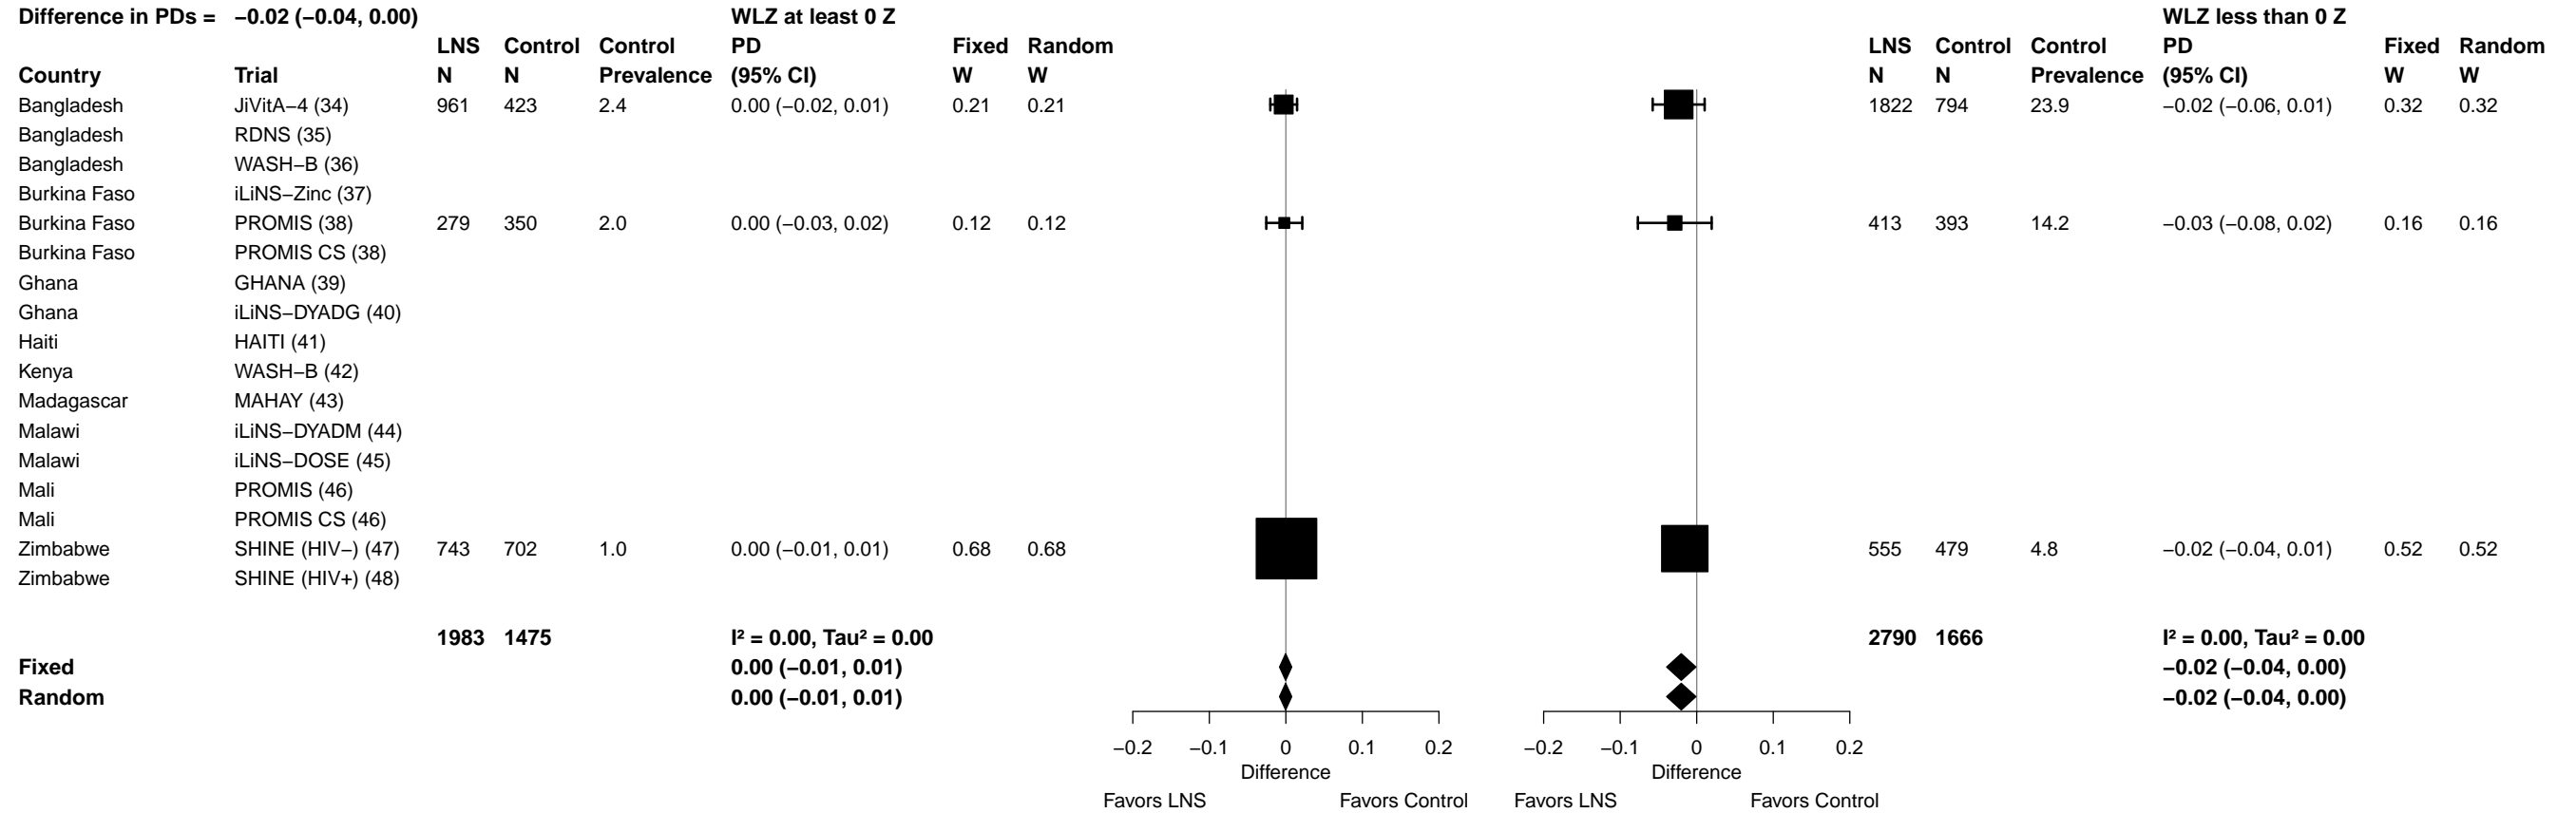

### Supplemental figure 6G: Mean difference in MUACZ

#### 6G1: Stratified by Maternal height

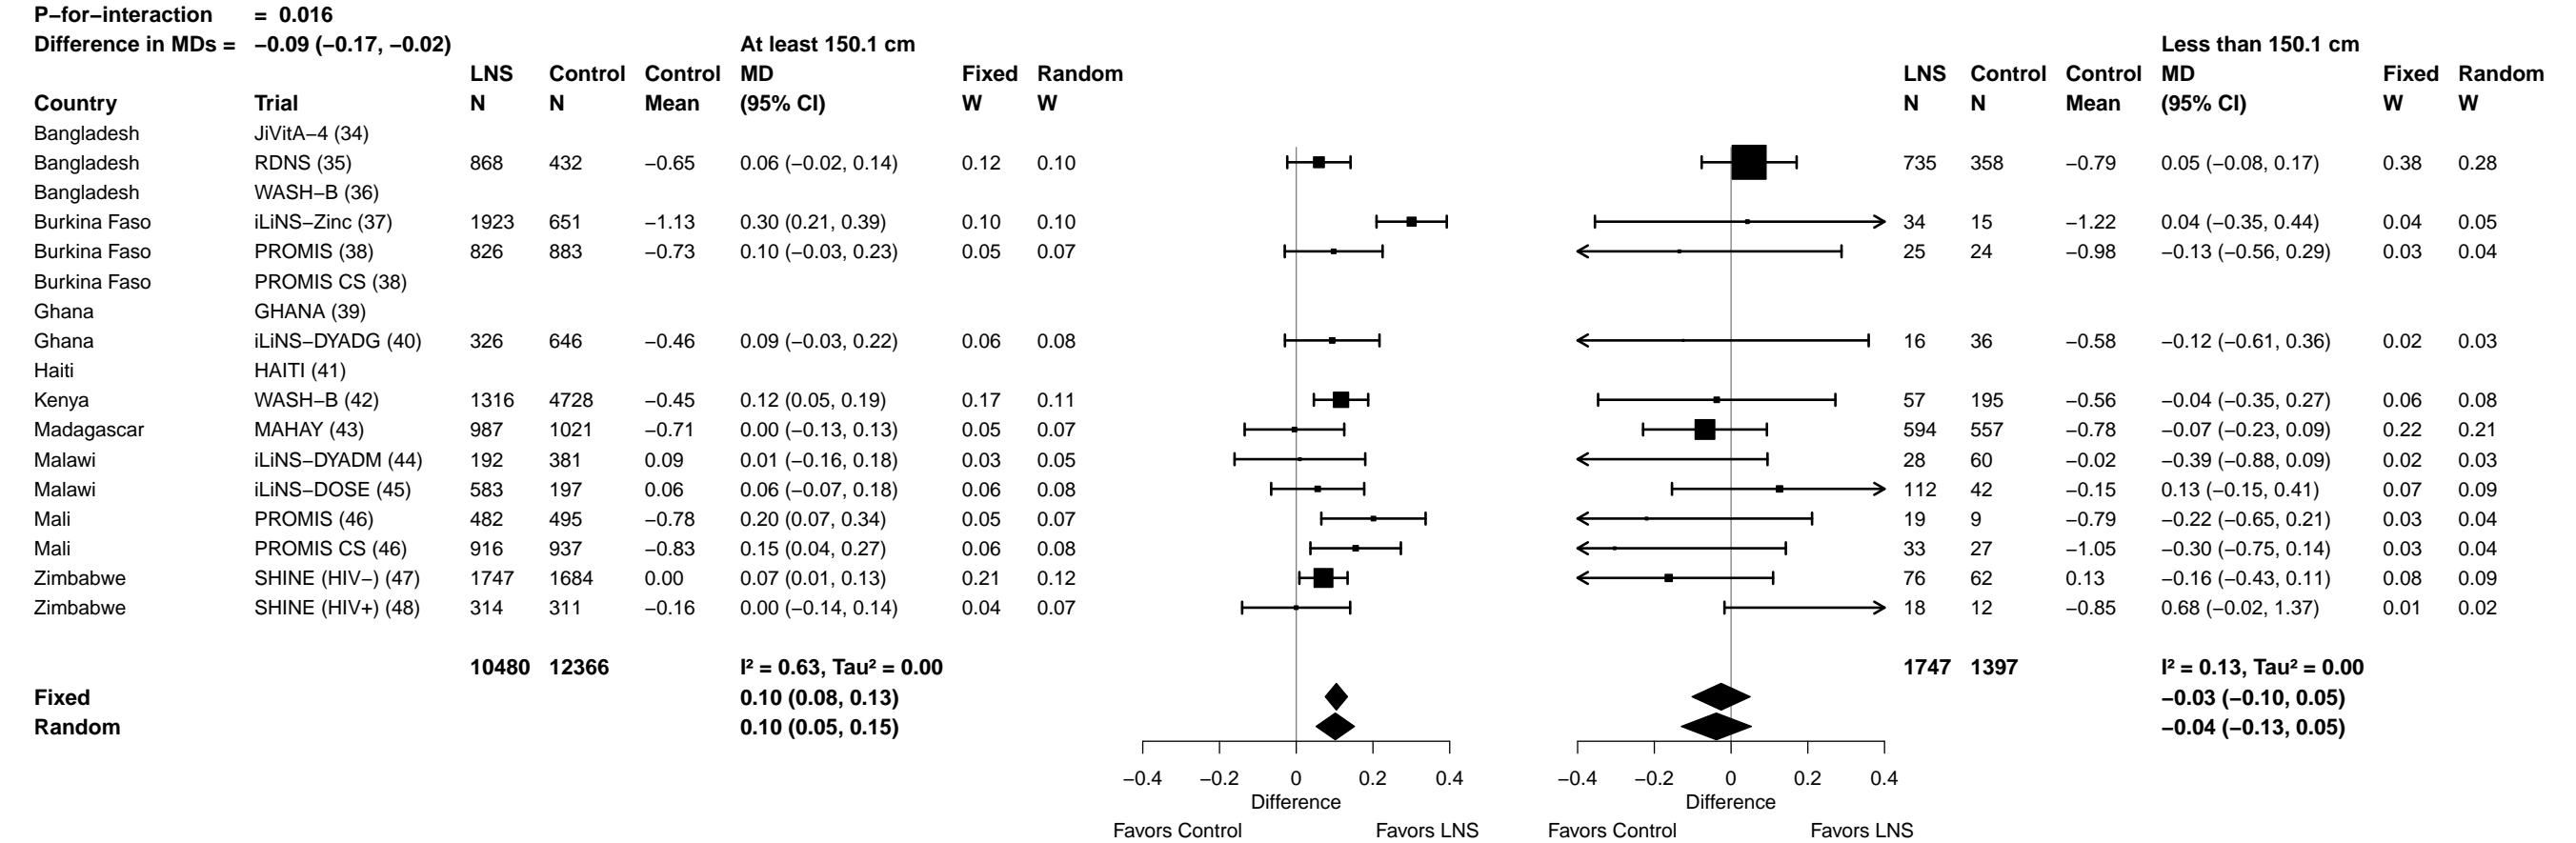

Supplemental figure 6G: Mean difference in MUACZ

6G2: Stratified by Maternal BMI

P-for-interaction = 0.580

Difference in MDs = -0.01 (-0.07, 0.04)

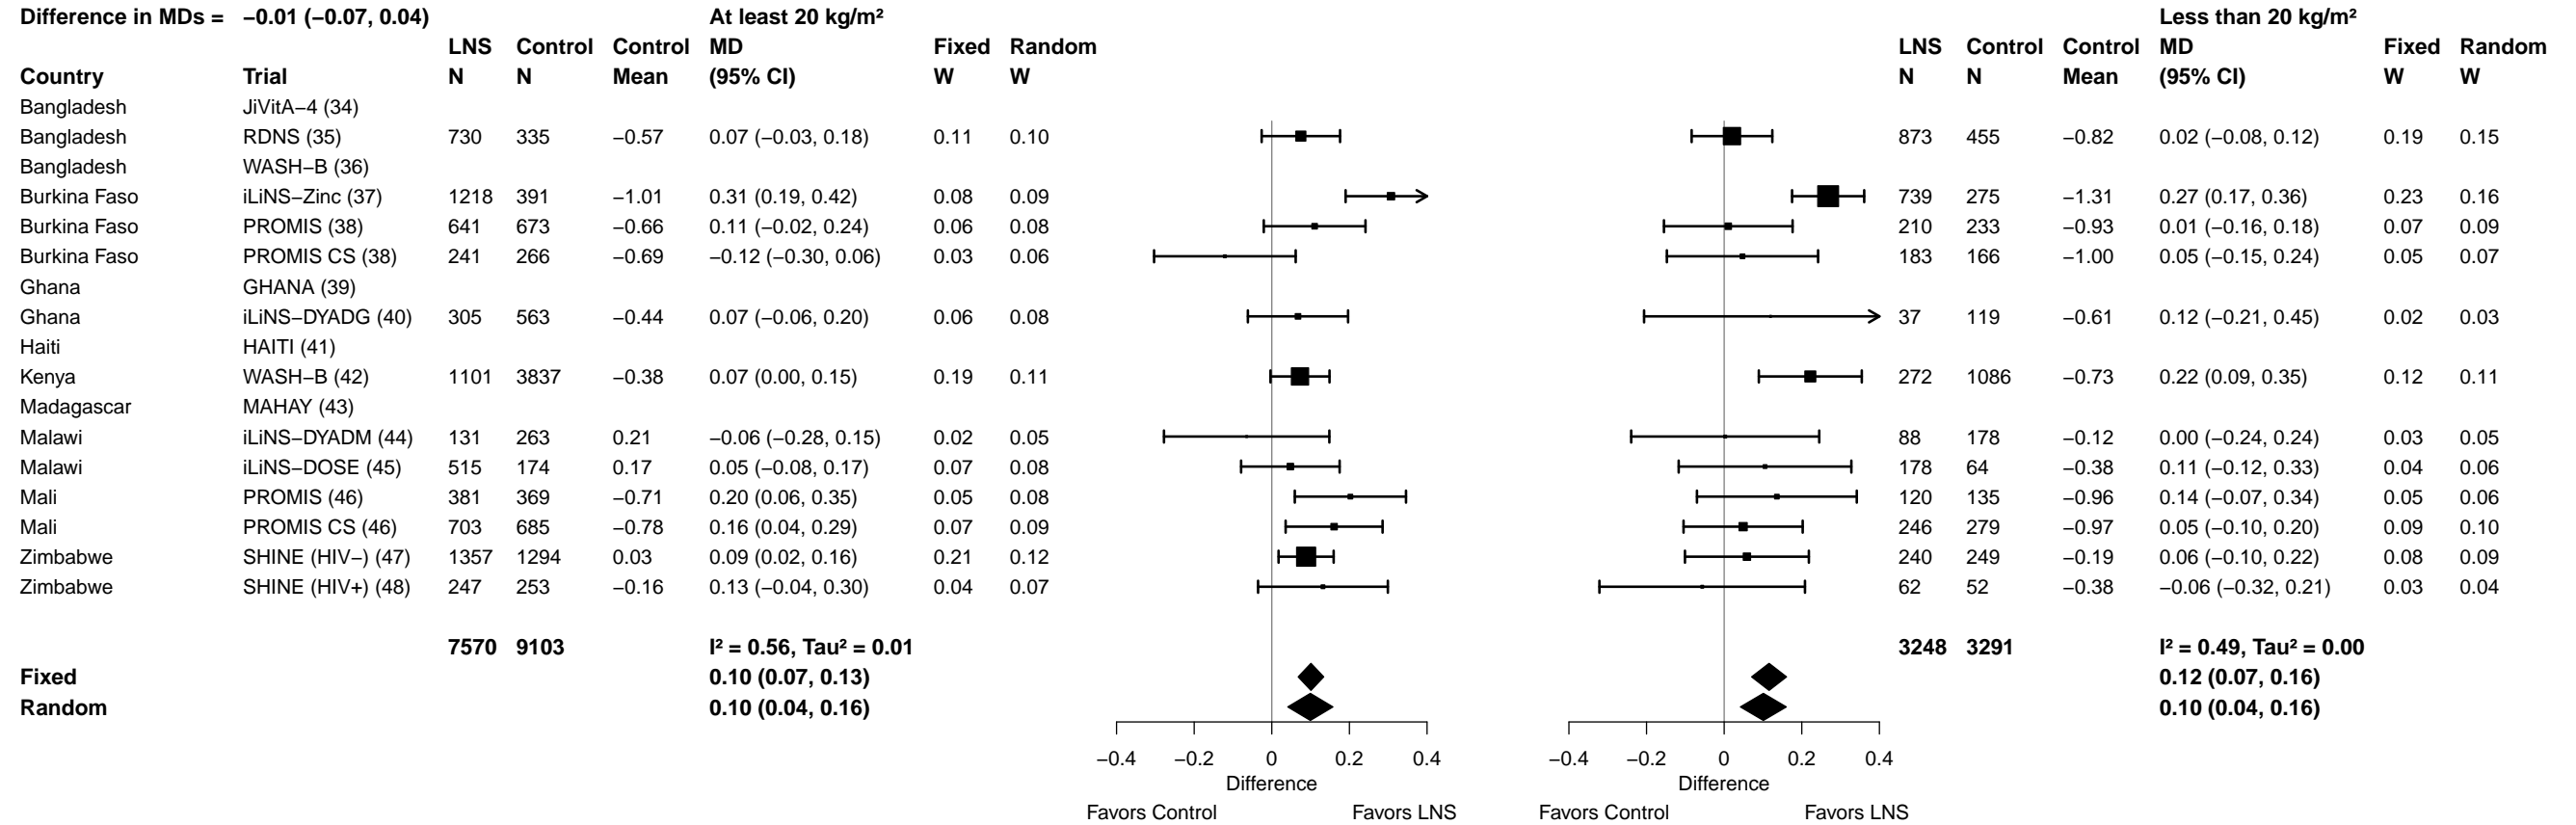





Supplemental figure 6G: Mean difference in MUACZ

6G4: Stratified by Maternal education

P-for-interaction = 0.688

Difference in MDs = 0.01 (-0.04, 0.06)

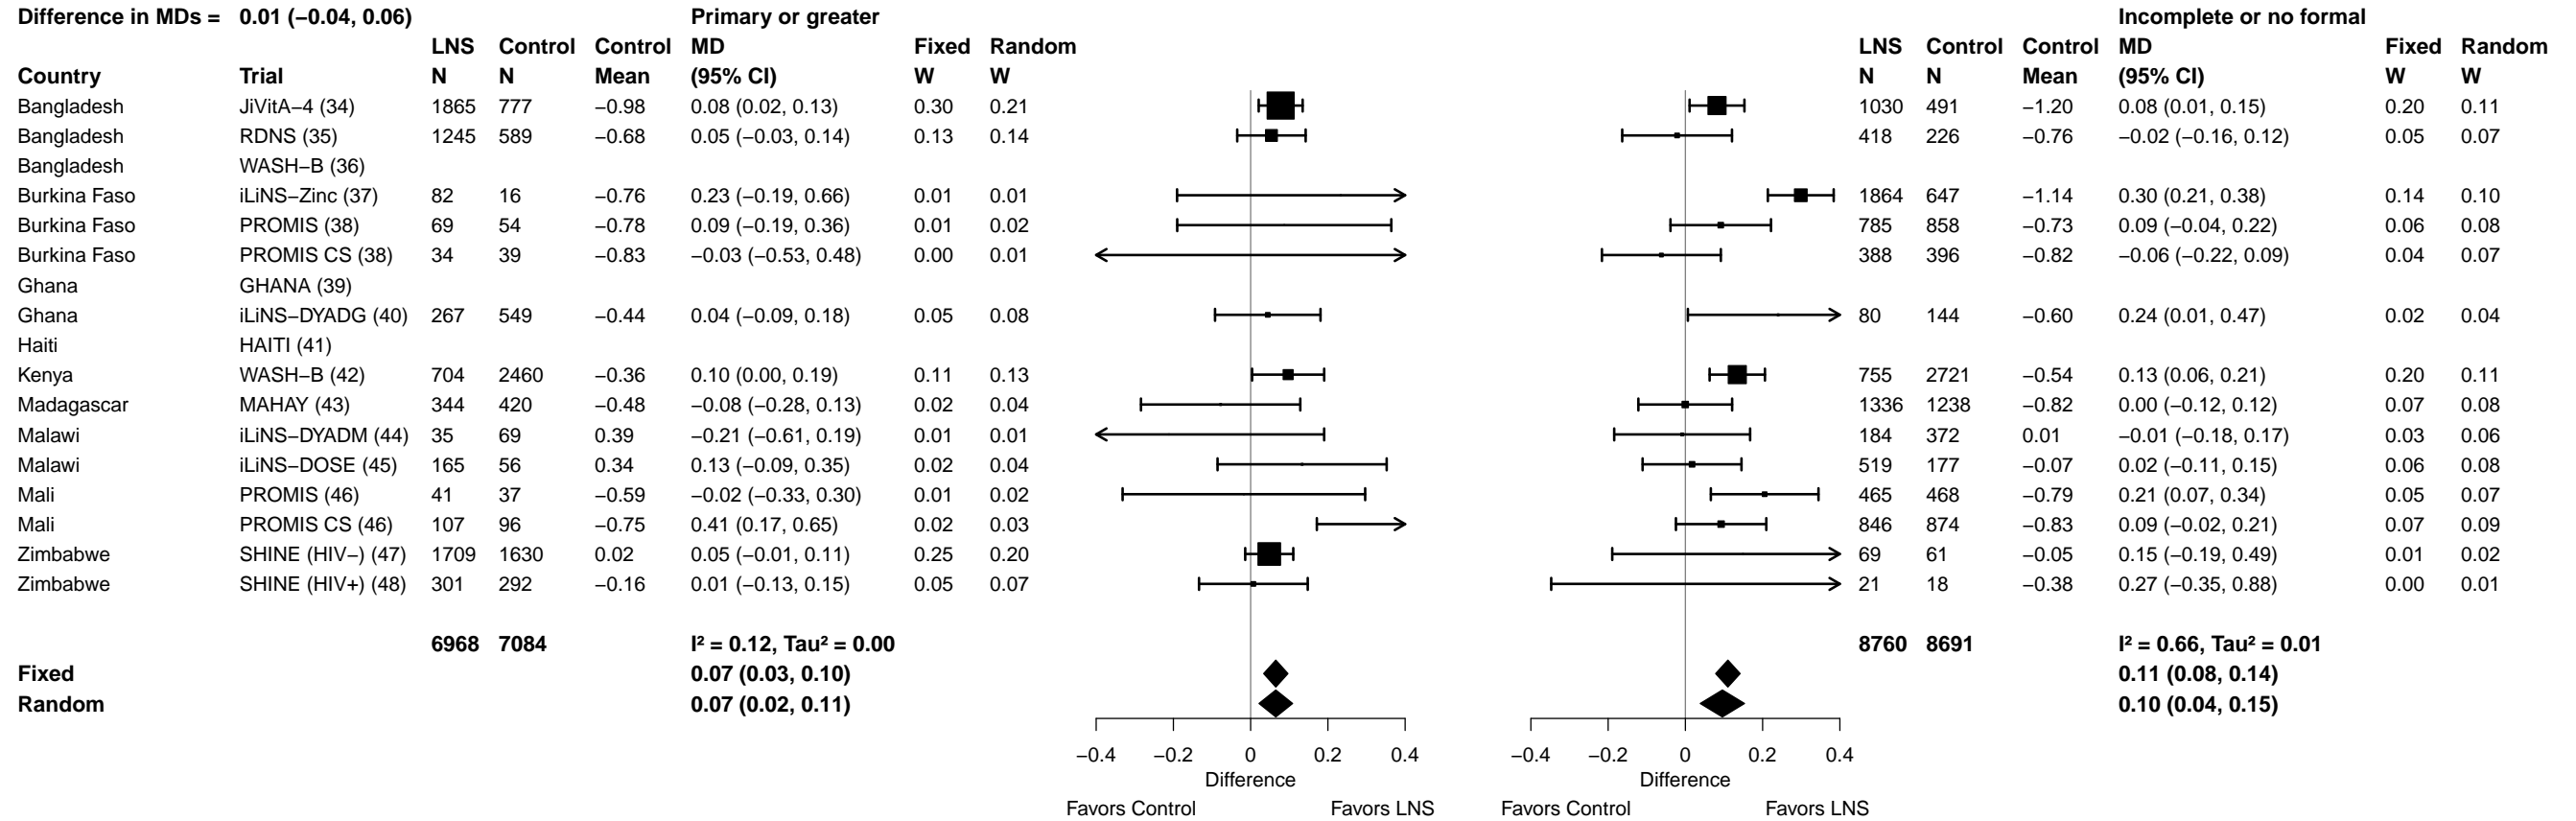

Supplemental figure 6G: Mean difference in MUACZ

6G5: Stratified by Maternal depressive symptoms

P-for-interaction = 0.348

Difference in MDs = -0.03 (-0.09, 0.03)

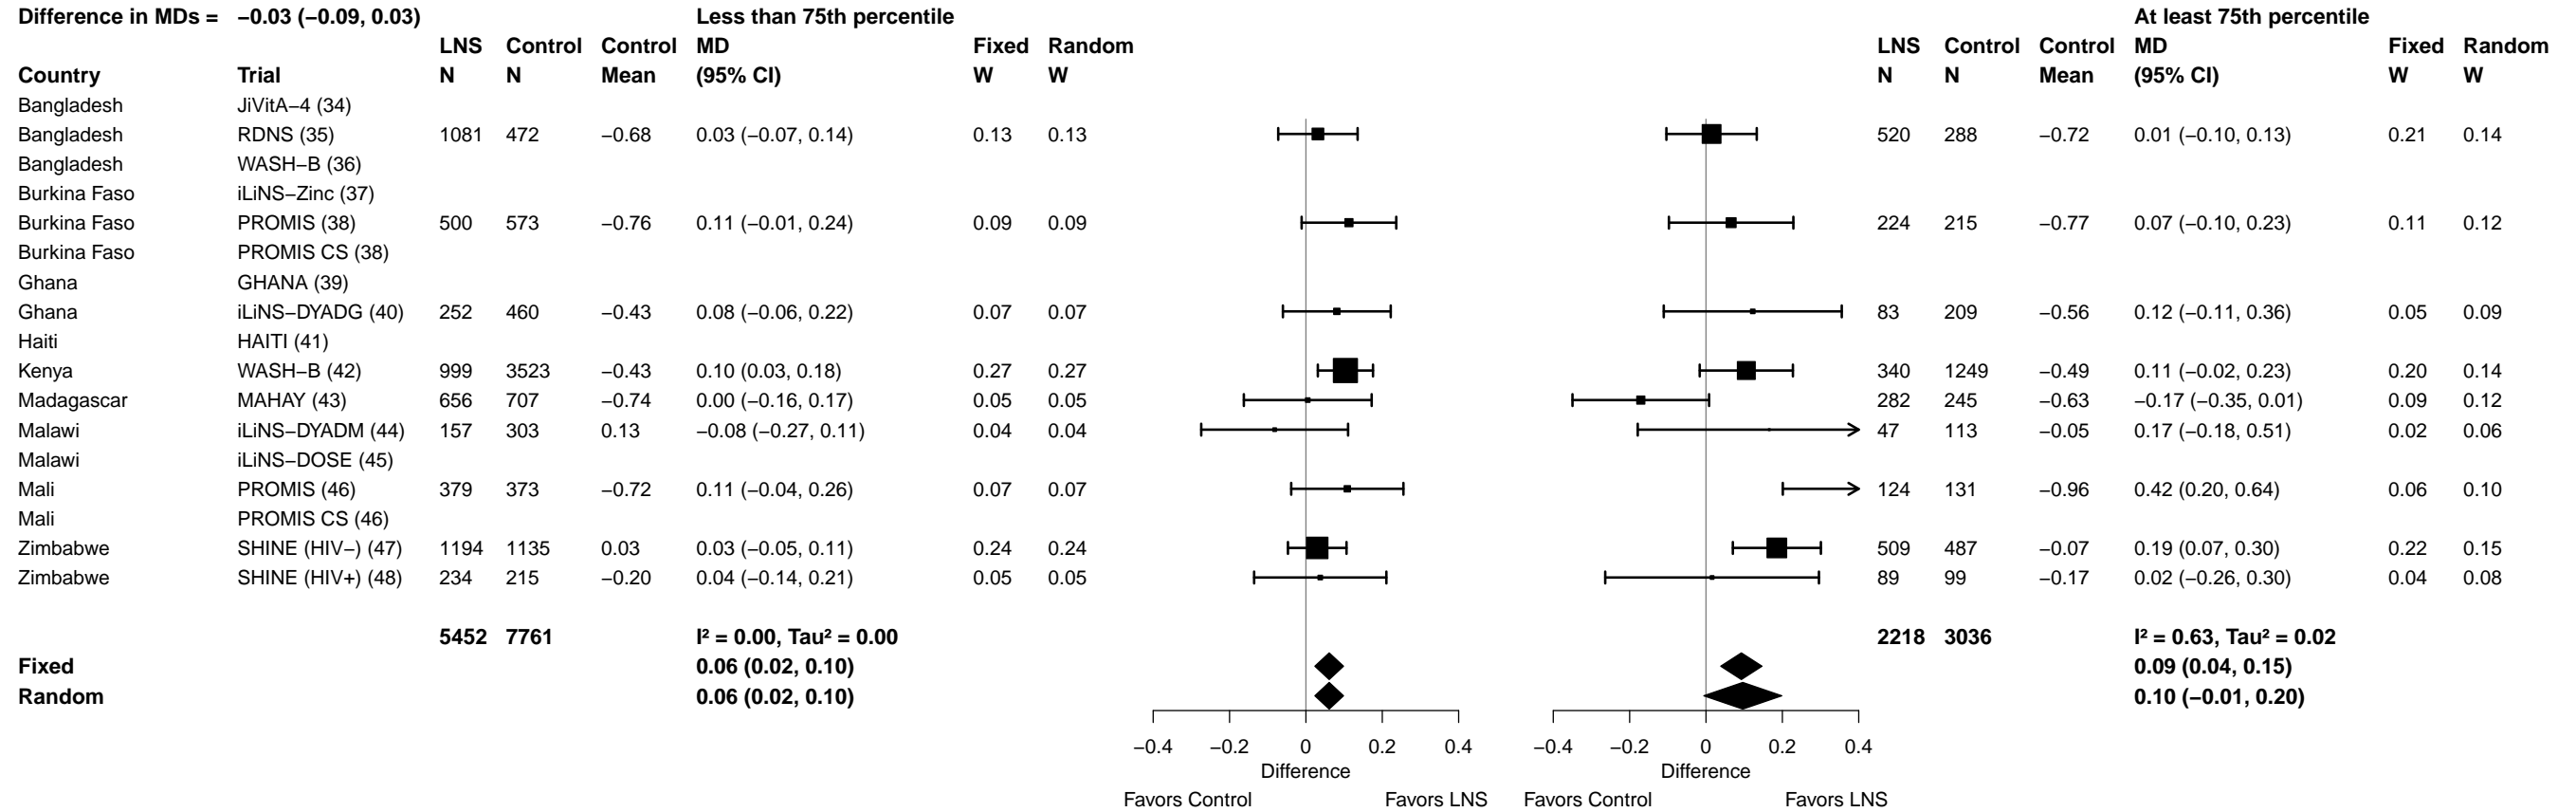



Supplemental figure 6G: Mean difference in MUACZ

6G7: Stratified by Child birth order

P-for-interaction = 0.004

Difference in MDs = -0.07 (-0.11, -0.02)

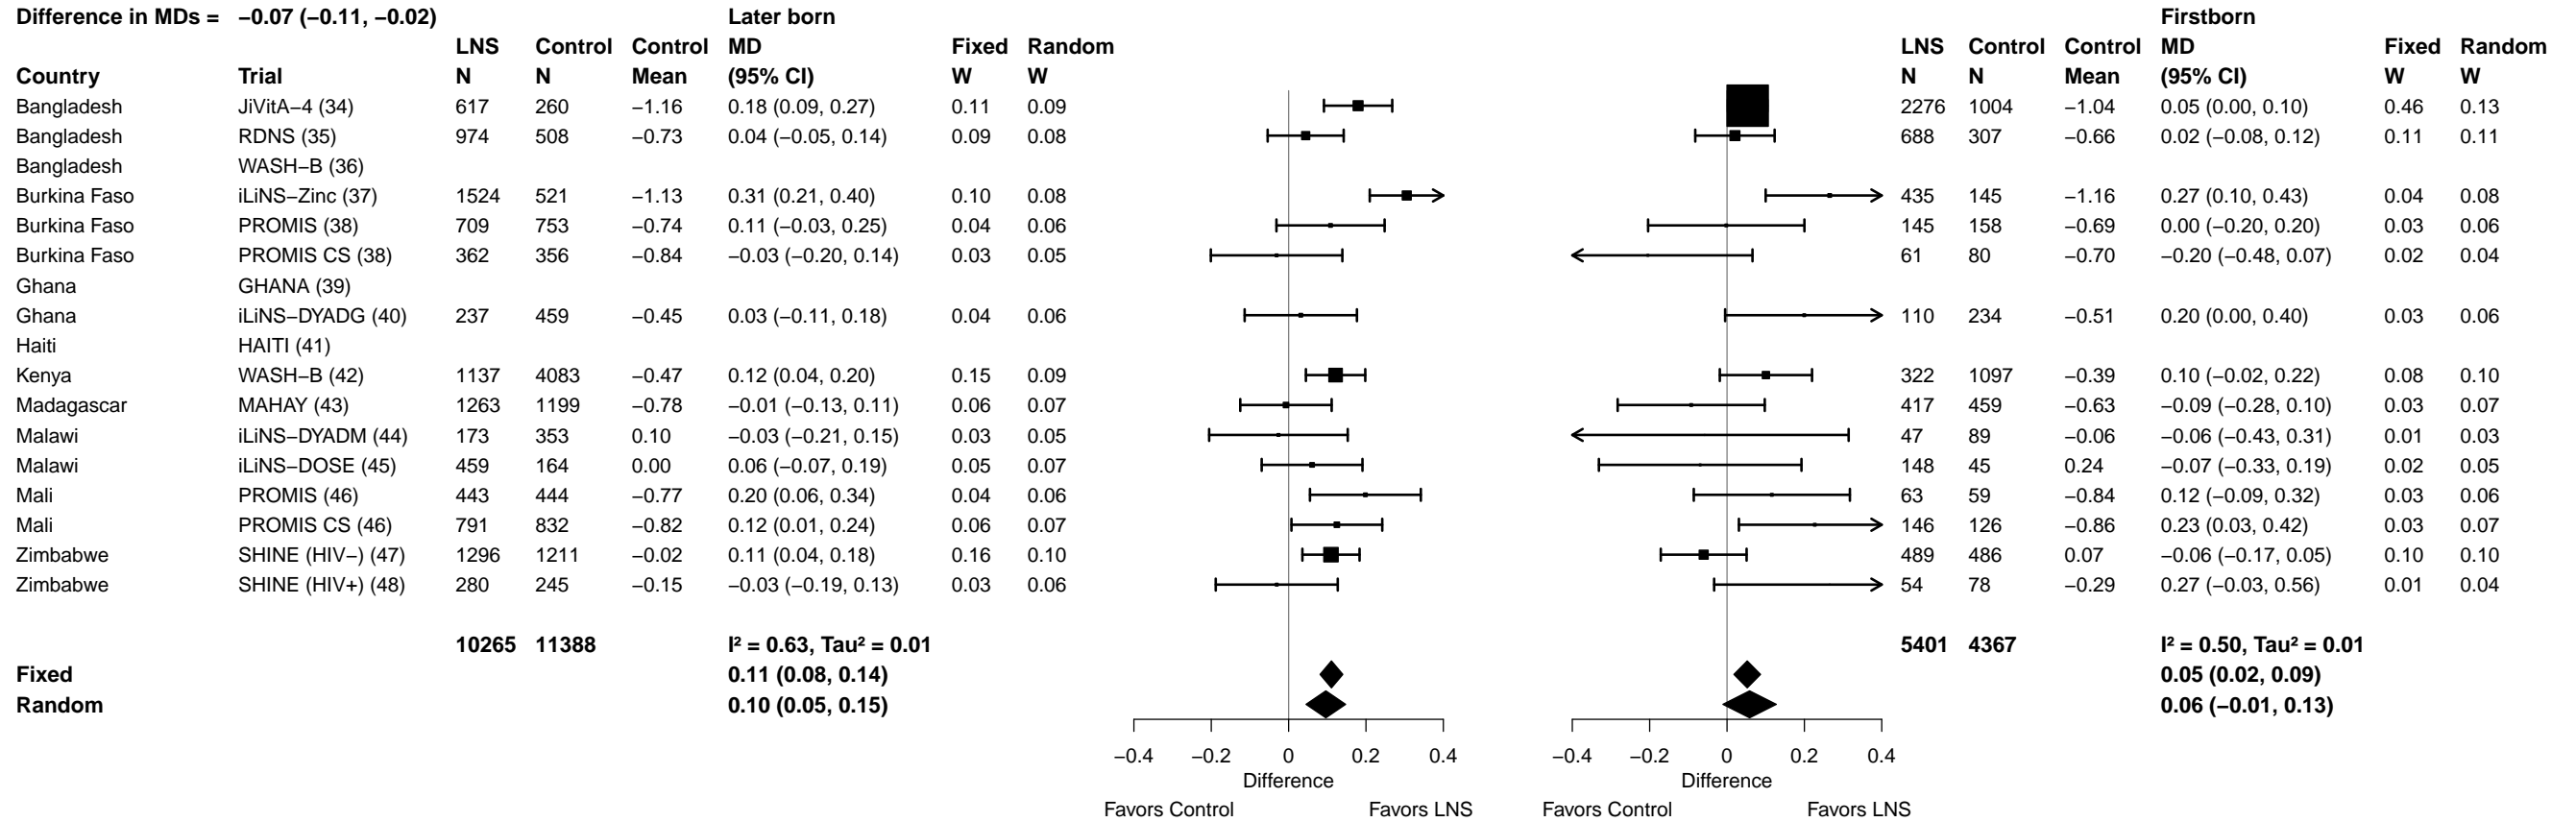

Supplemental figure 6G: Mean difference in MUACZ

6G8: Stratified by Child baseline anthropometric status

P-for-interaction = 0.177

Difference in MDs = 0.04 (-0.02, 0.10)

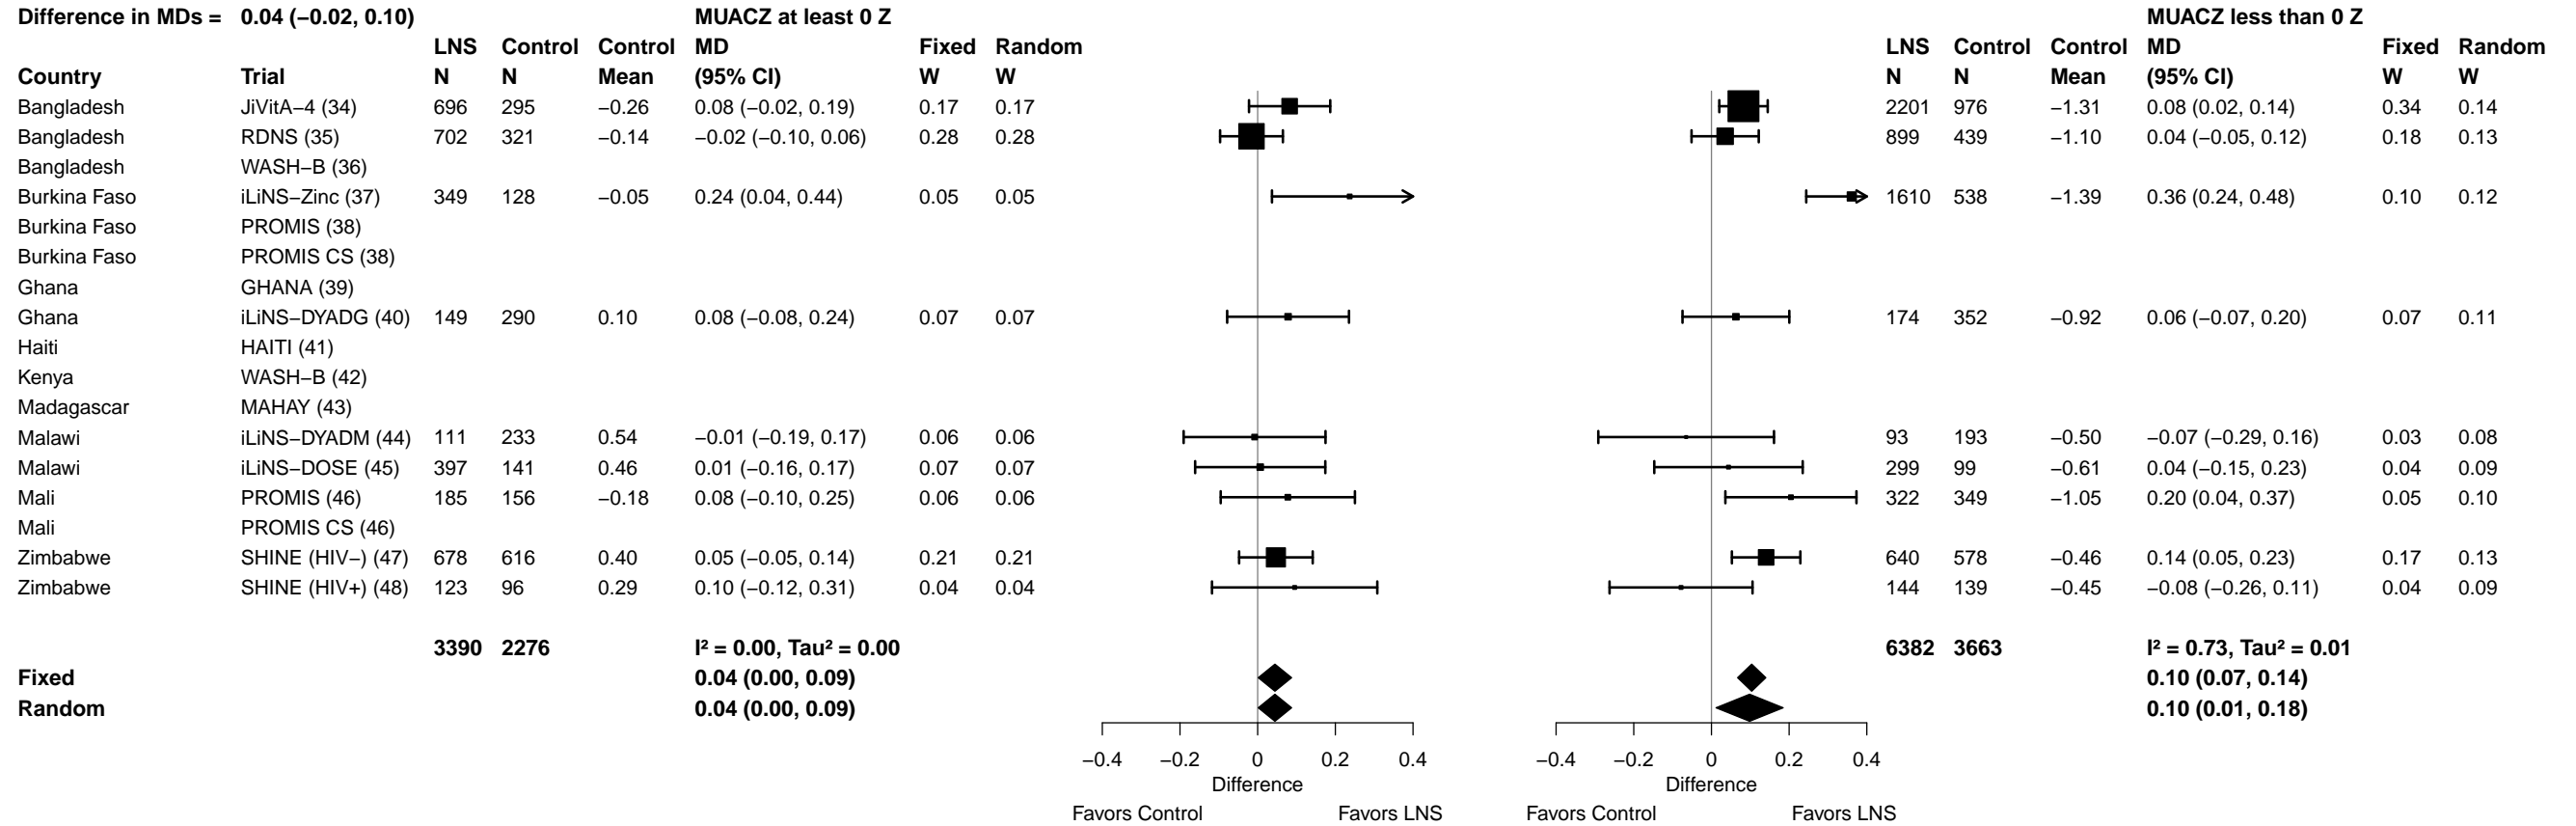

**Supplemental figure 6H: Low MUAC prevalence ratio**

**6H1: Stratified by Maternal height (insufficient comparisons)**

Supplemental figure 6H: Low MUAC prevalence ratio

6H2: Stratified by Maternal BMI

P-for-interaction = 0.337

Ratio of PRs = 1.12 (0.89, 1.40)

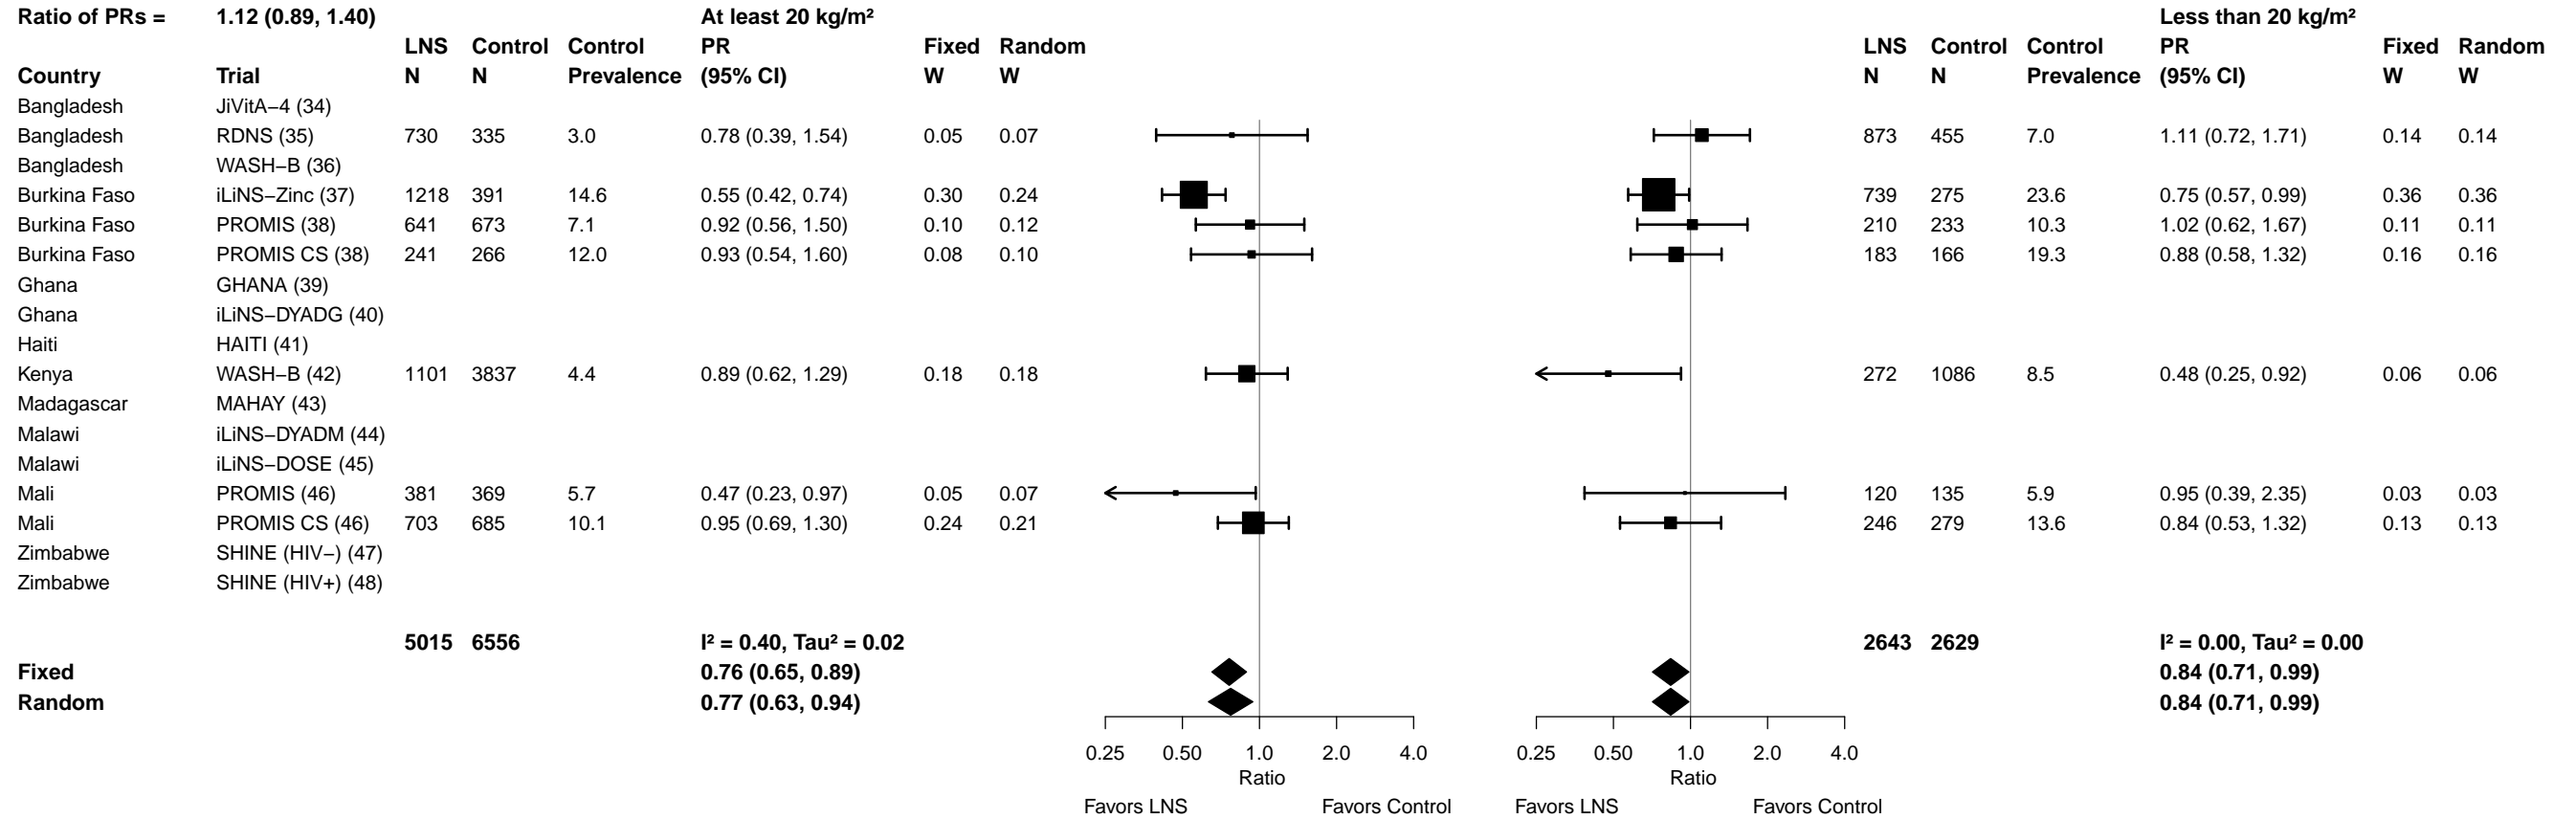

Supplemental figure 6H: Low MUAC prevalence ratio

6H3: Stratified by Maternal age

P-for-interaction = 0.741

Ratio of PRs = 1.03 (0.87, 1.22)

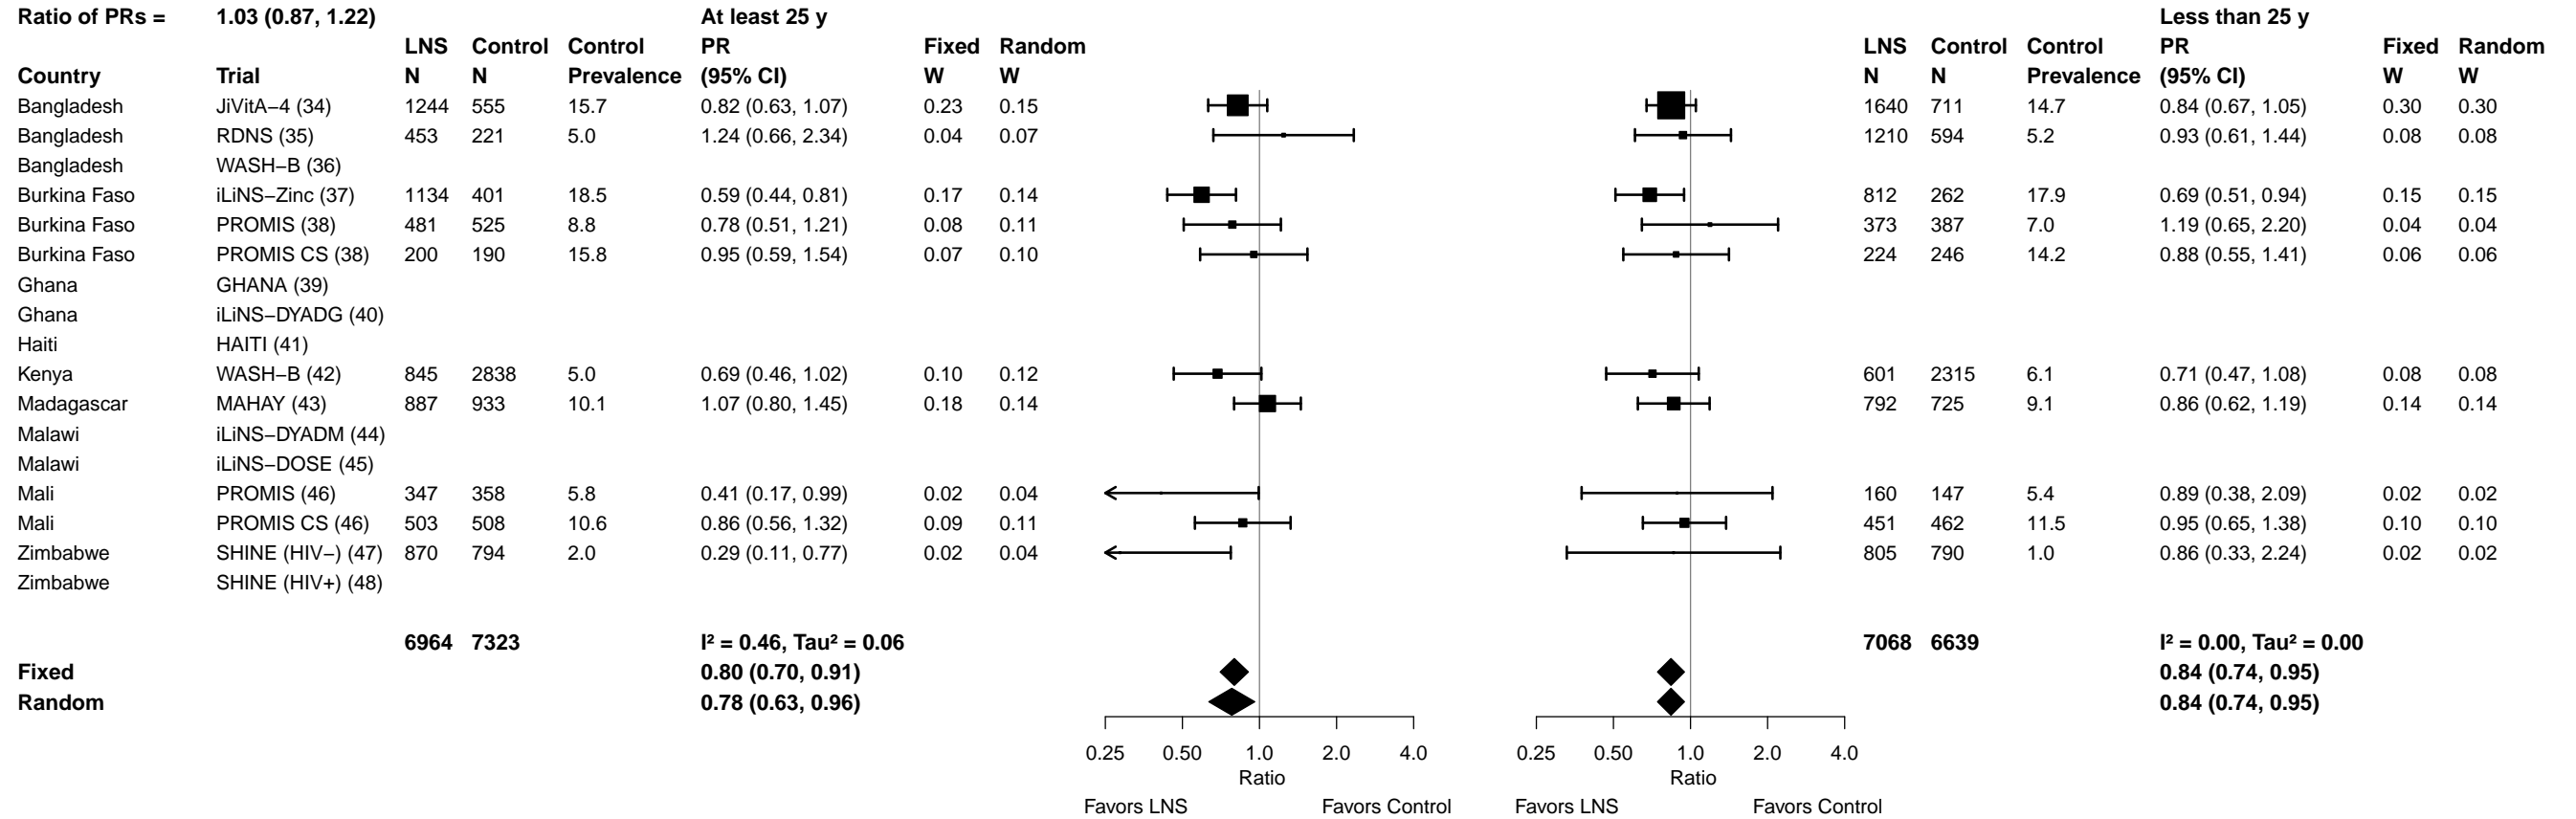



Supplemental figure 6H: Low MUAC prevalence ratio

6H4: Stratified by Maternal education

P-for-interaction = 0.240

Ratio of PRs = 1.16 (0.91, 1.48)

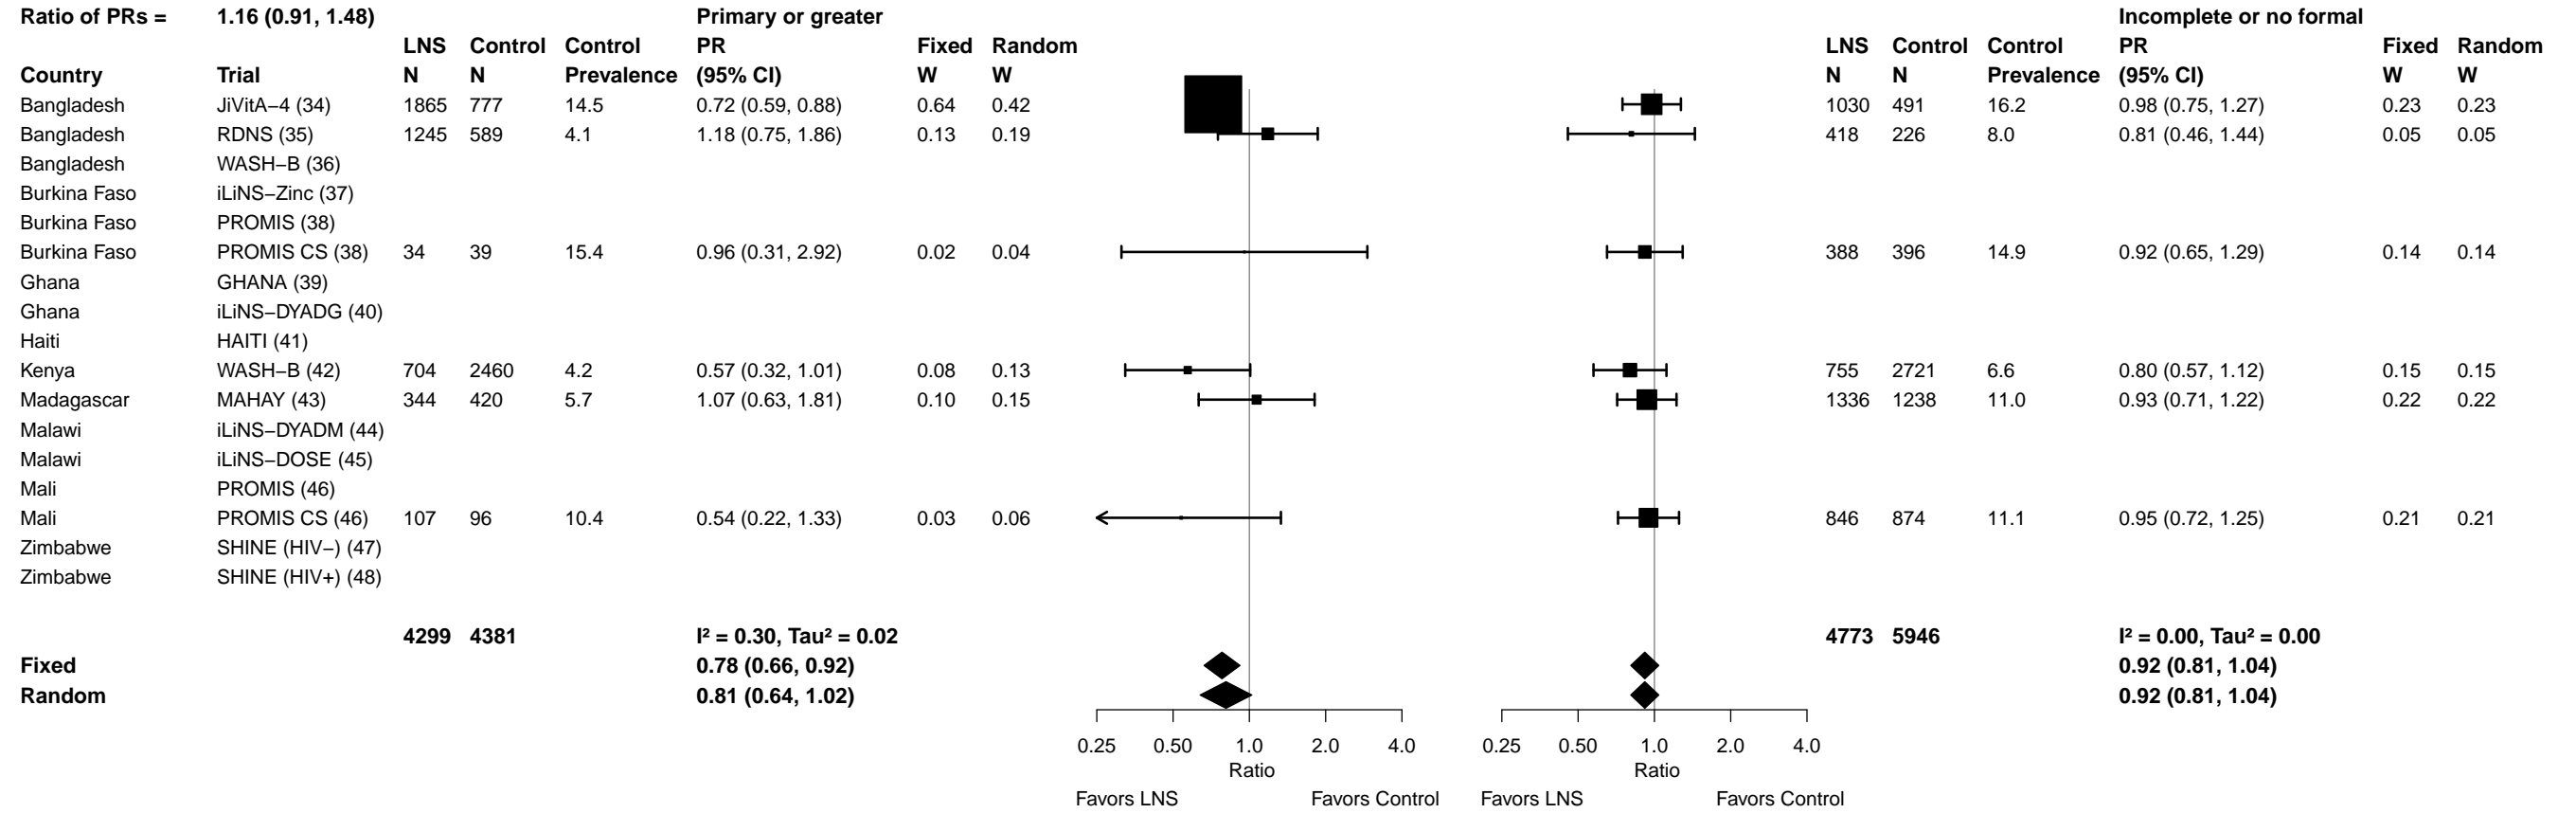

Supplemental figure 6H: Low MUAC prevalence ratio

6H5: Stratified by Maternal depressive symptoms

P-for-interaction = 0.798

Ratio of PRs = 1.04 (0.77, 1.40)

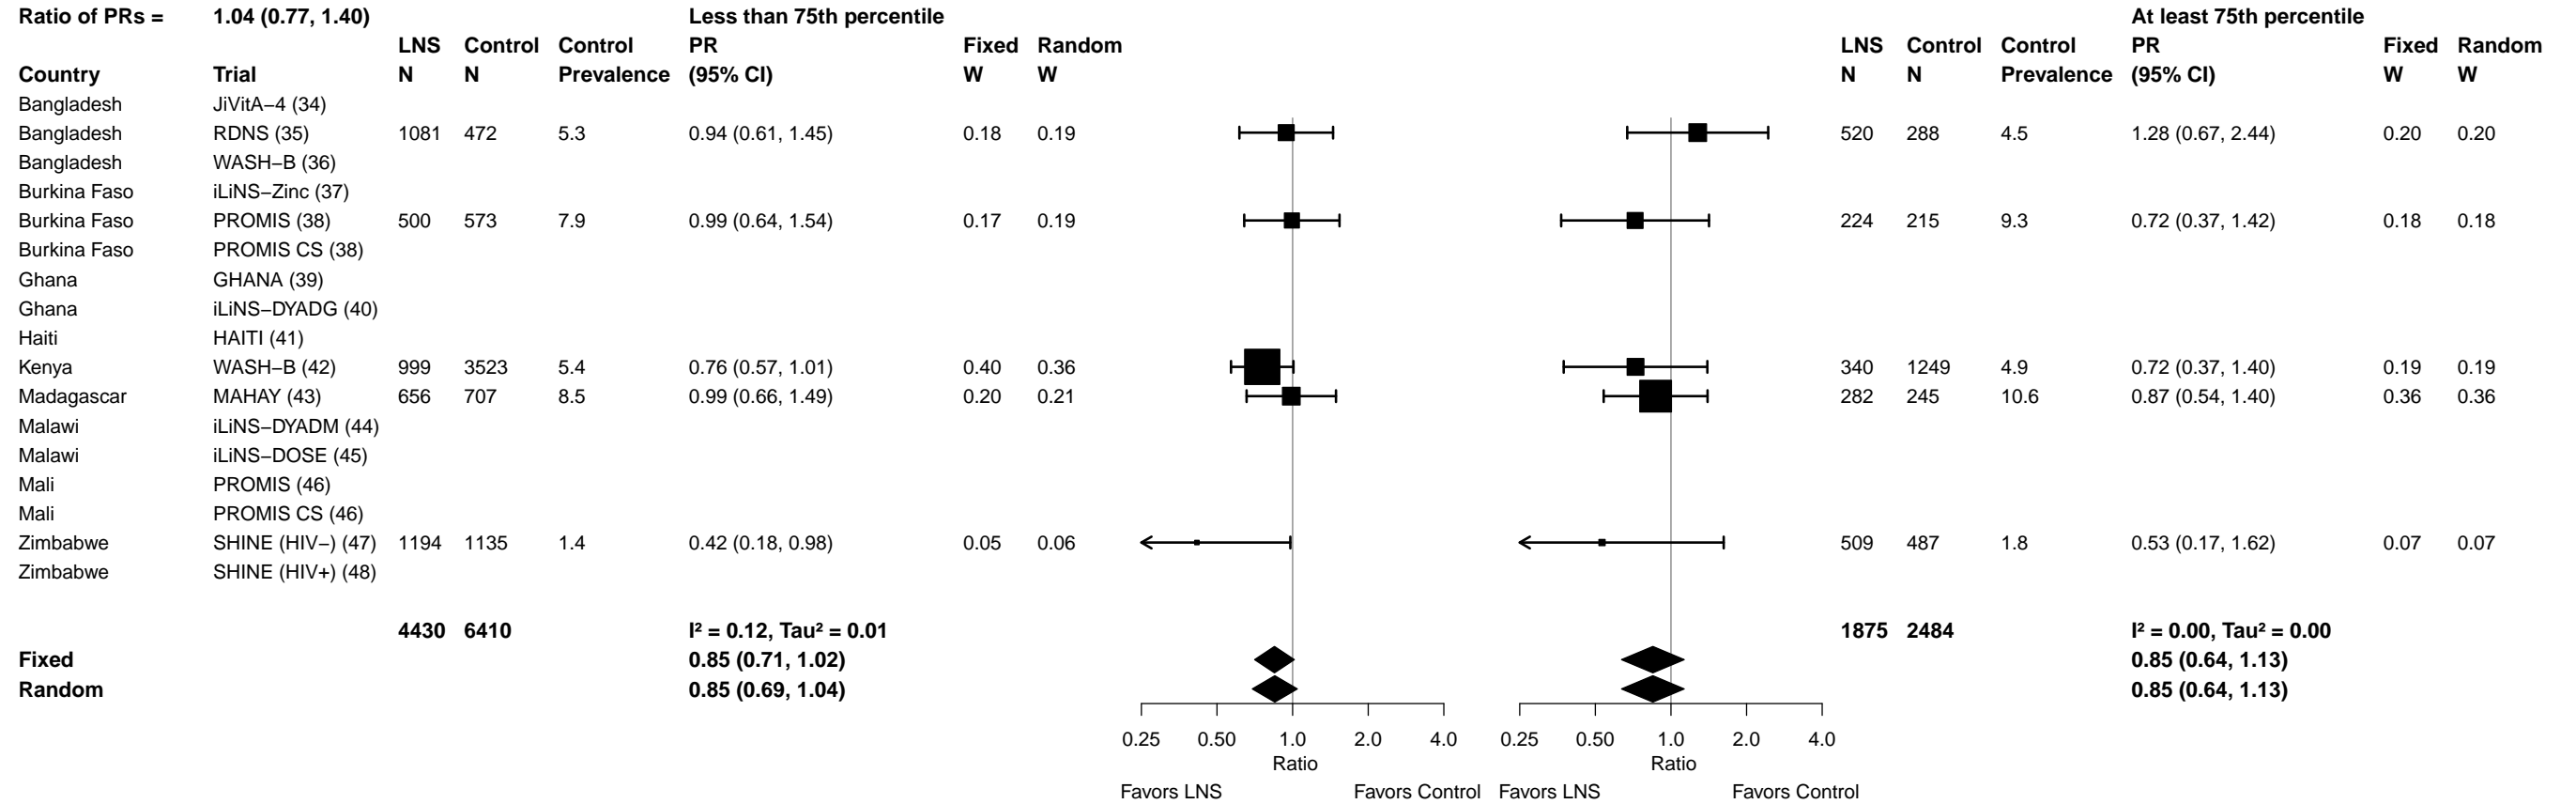

Supplemental figure 6H: Low MUAC prevalence ratio

6H6: Stratified by Child sex

P-for-interaction = 0.002

Ratio of PRs = 0.77 (0.66, 0.91)

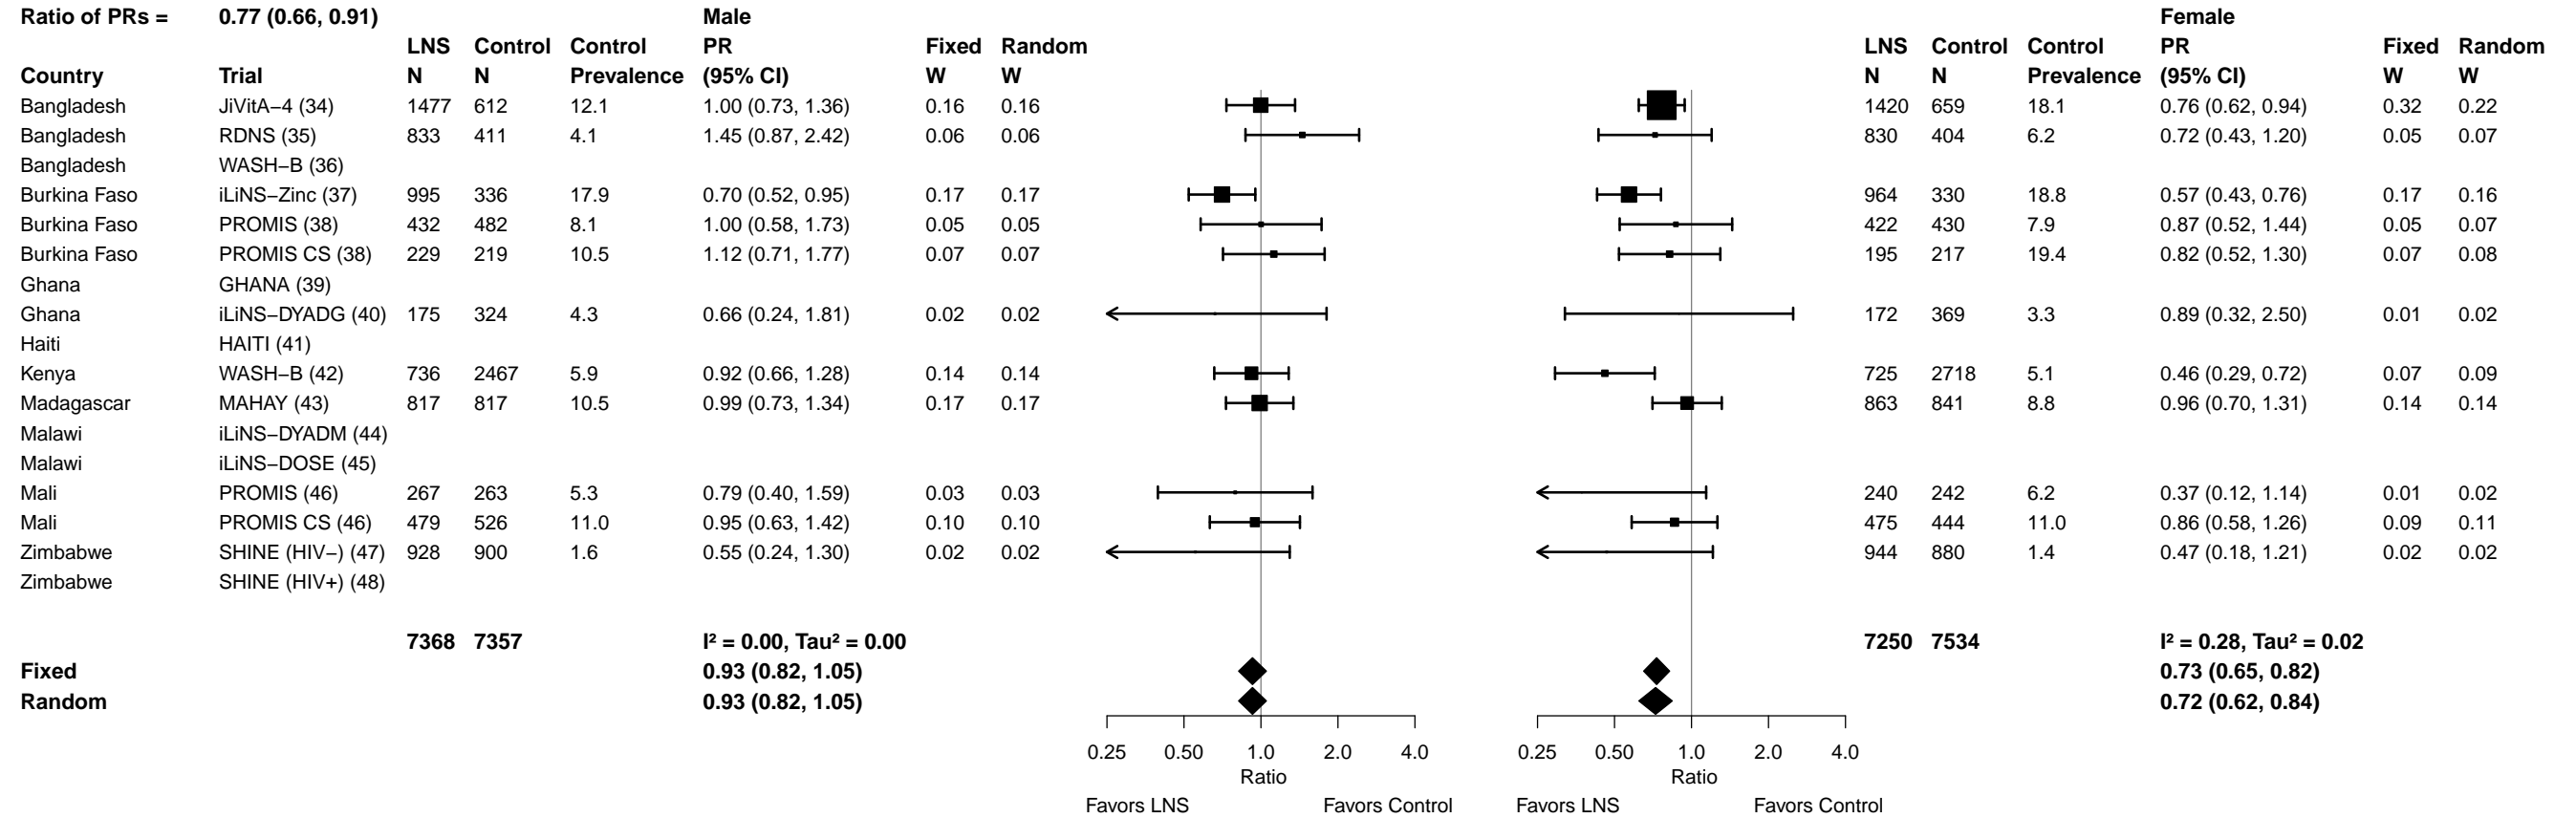

Supplemental figure 6H: Low MUAC prevalence ratio

6H7: Stratified by Child birth order

P-for-interaction = 0.002

Ratio of PRs = 1.37 (1.12, 1.67)

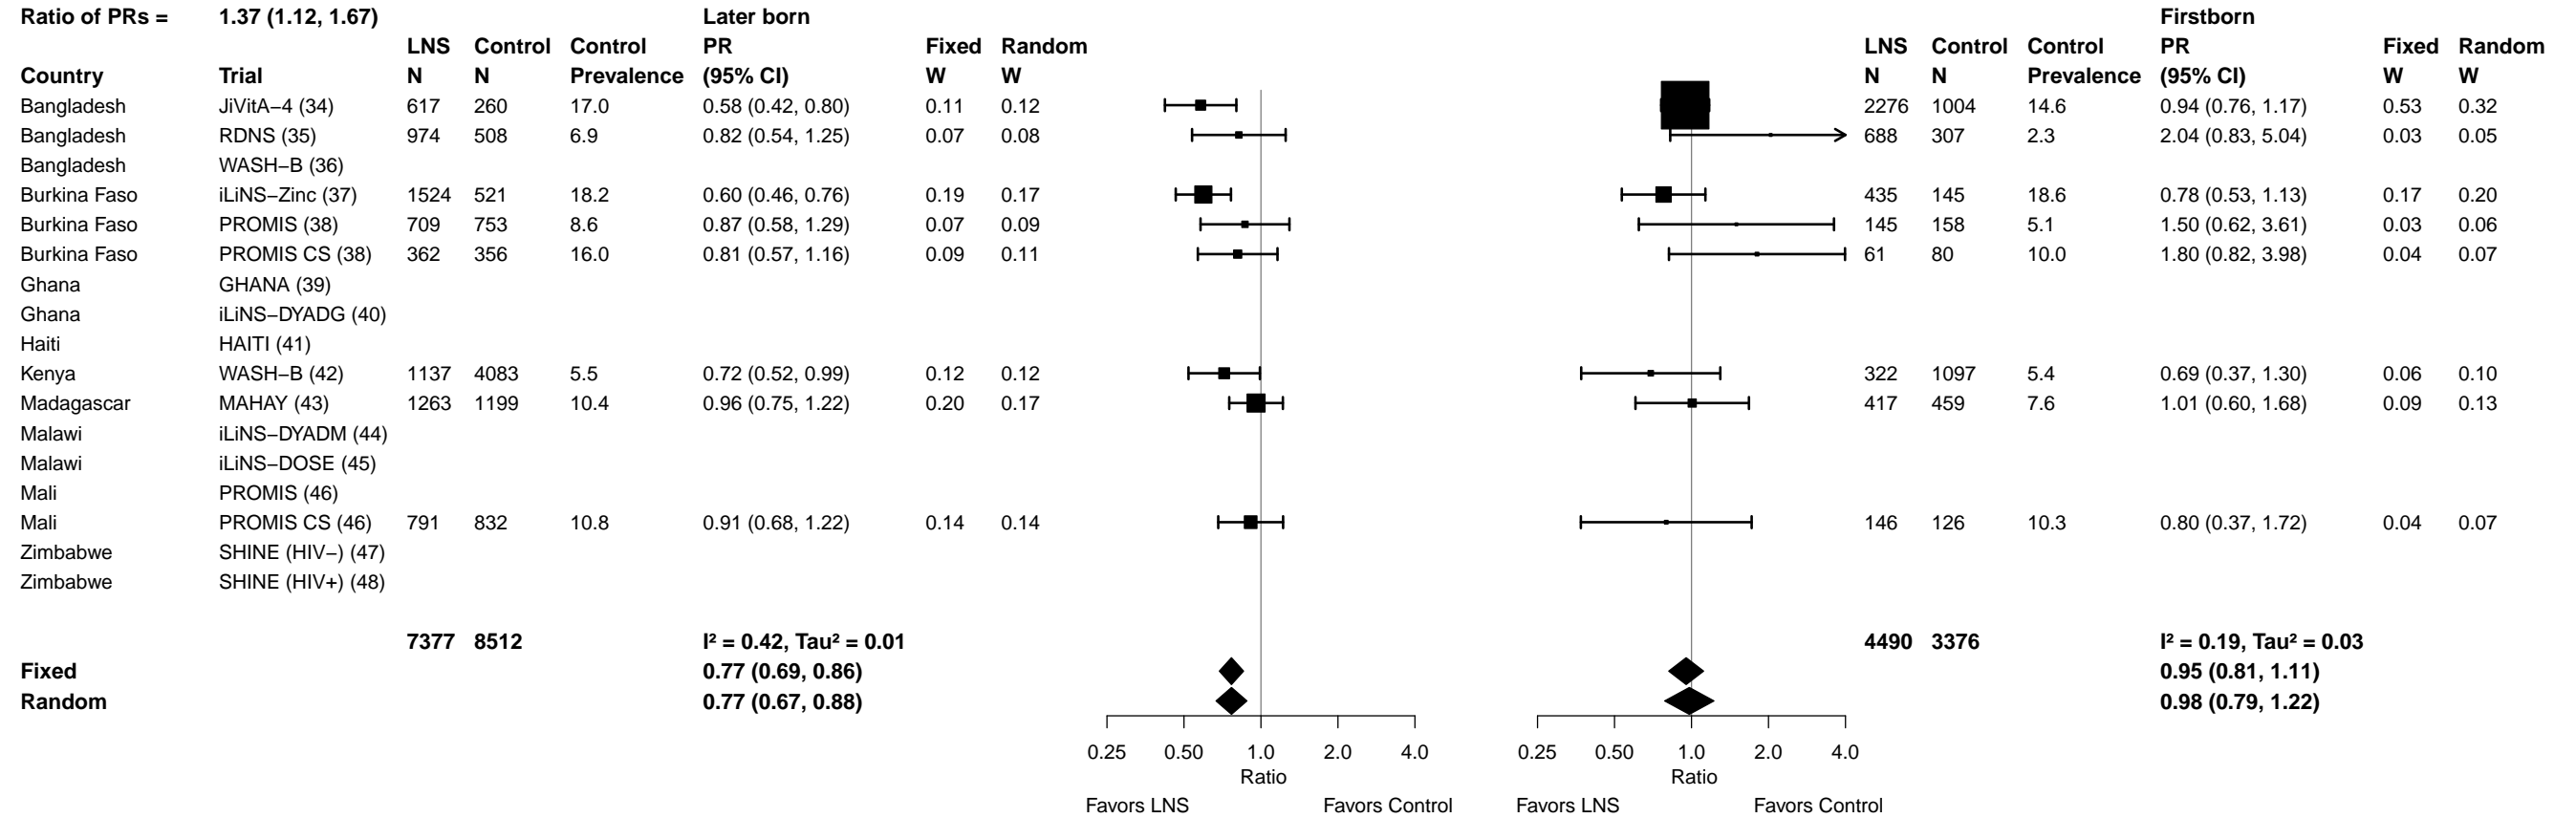

6H8: Stratified by Child baseline anthropometric status (insufficient comparisons)

**Supplemental figure 6I: Low MUAC prevalence difference**

**6I1: Stratified by Maternal height (insufficient comparisons)**

Supplemental figure 6I: Low MUAC prevalence difference

6I2: Stratified by Maternal BMI

P-for-interaction = 0.260

Difference in PDs = -0.01 (-0.03, 0.01)

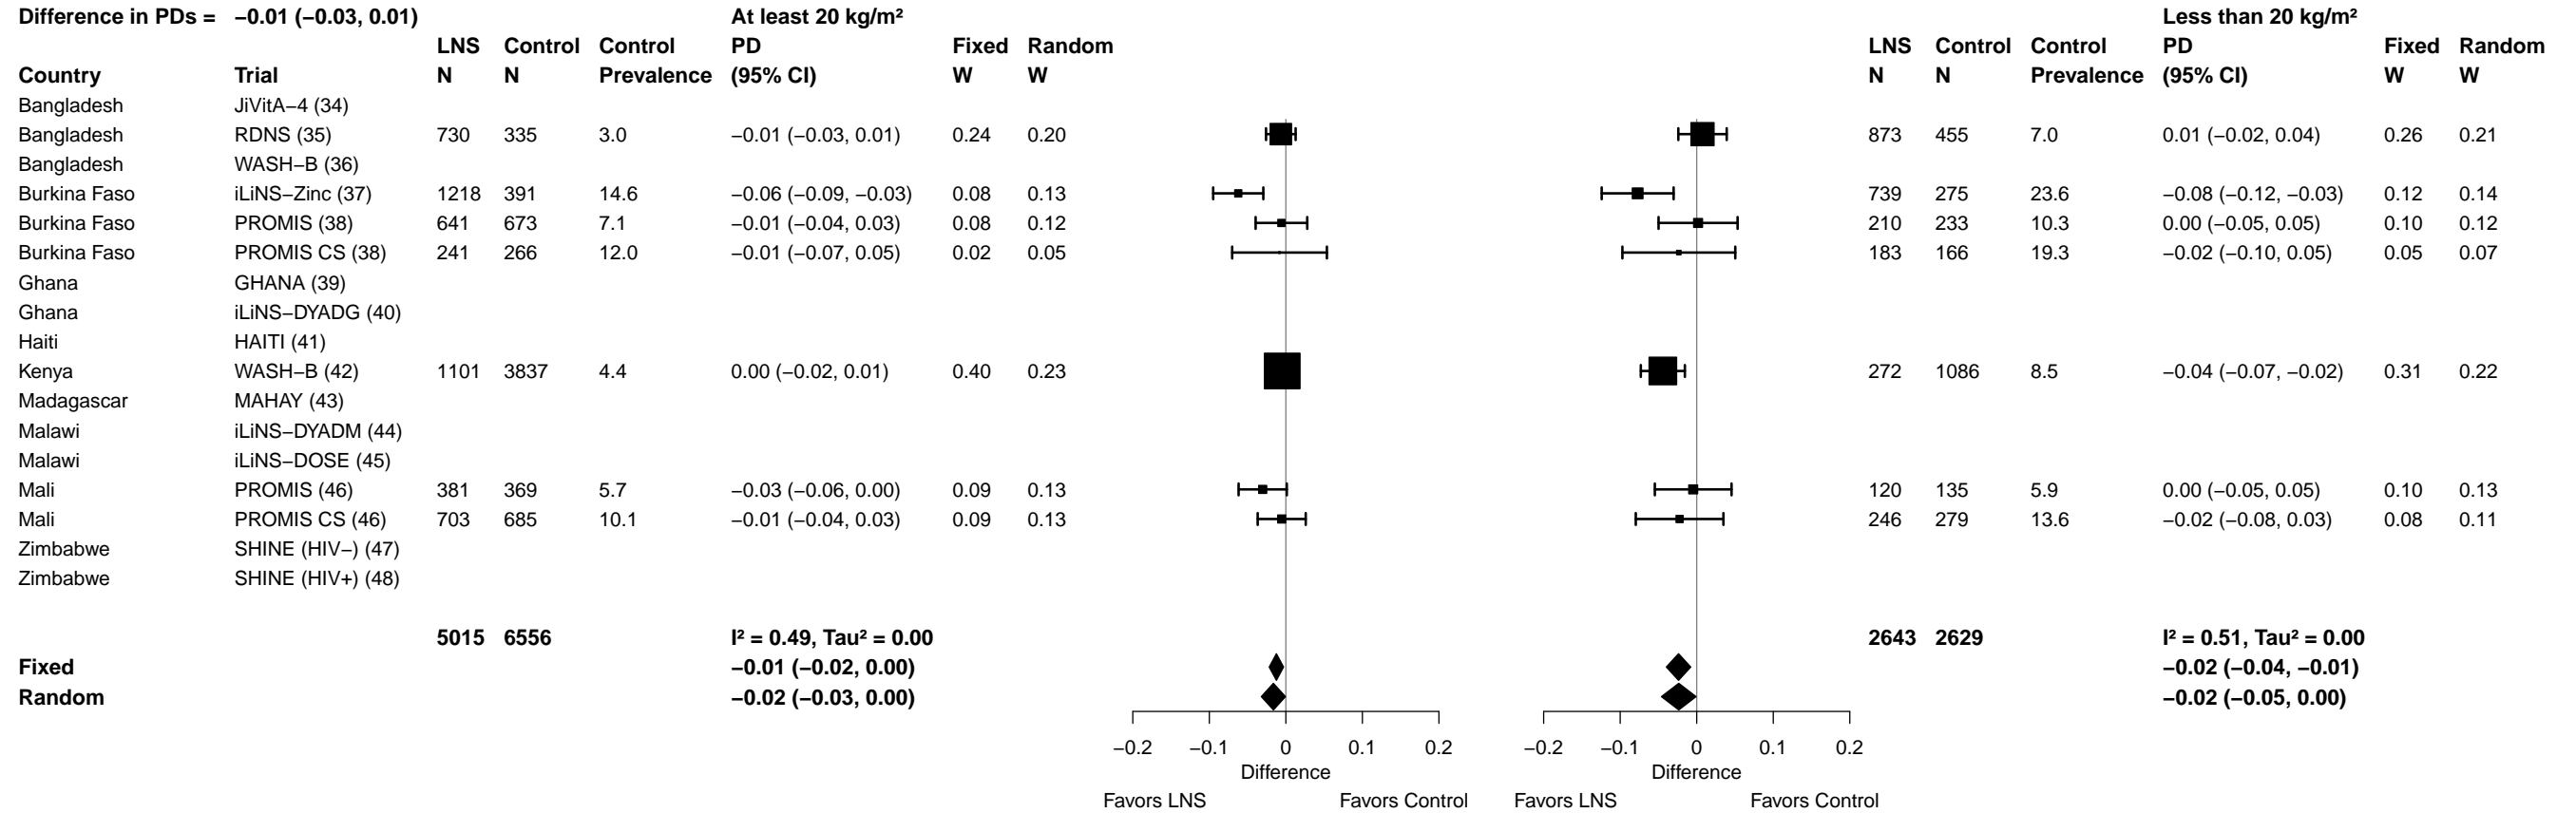

Supplemental figure 6I: Low MUAC prevalence difference

6I3: Stratified by Maternal age

P-for-interaction = 0.160  
 Difference in PDs = 0.01 (0.00, 0.02)

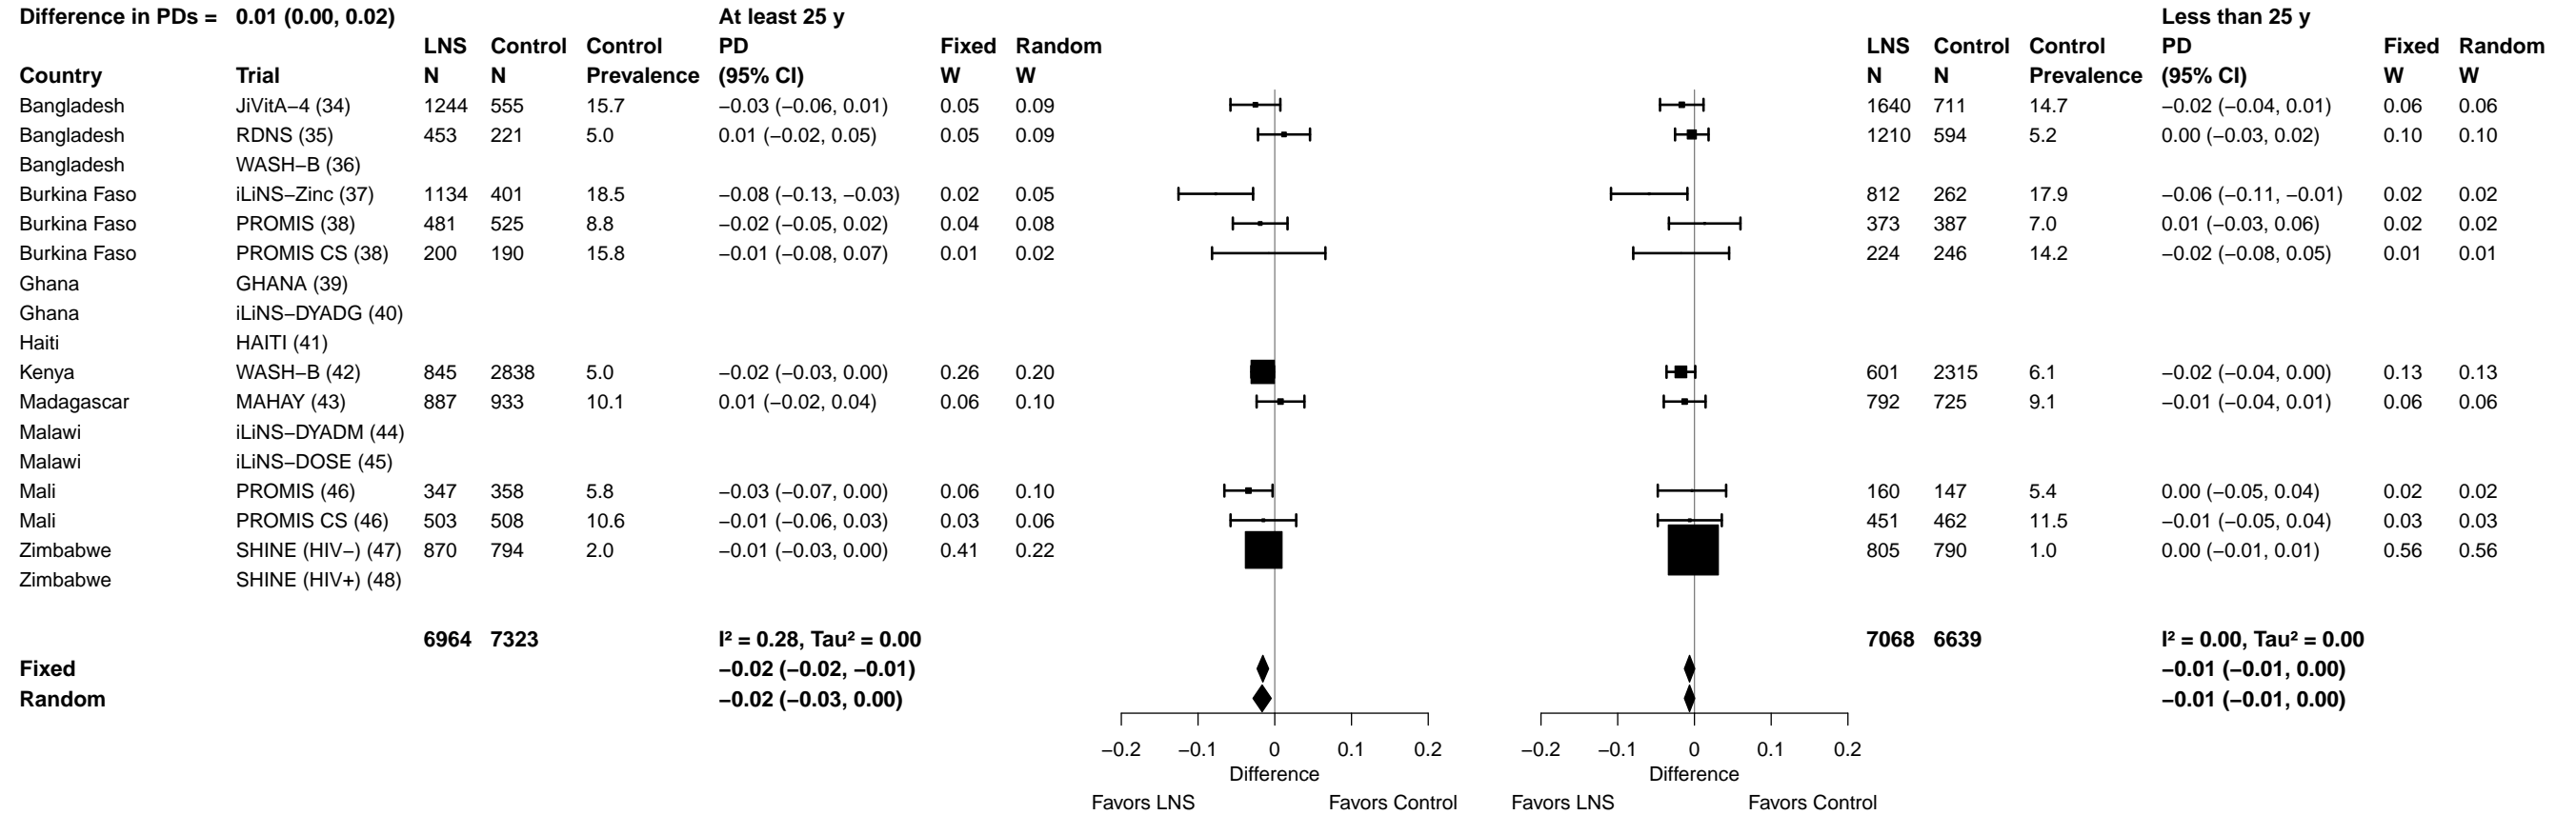

Supplemental figure 6I: Low MUAC prevalence difference

6I4: Stratified by Maternal education

P-for-interaction = 0.676

Difference in PDs = 0.00 (-0.01, 0.02)

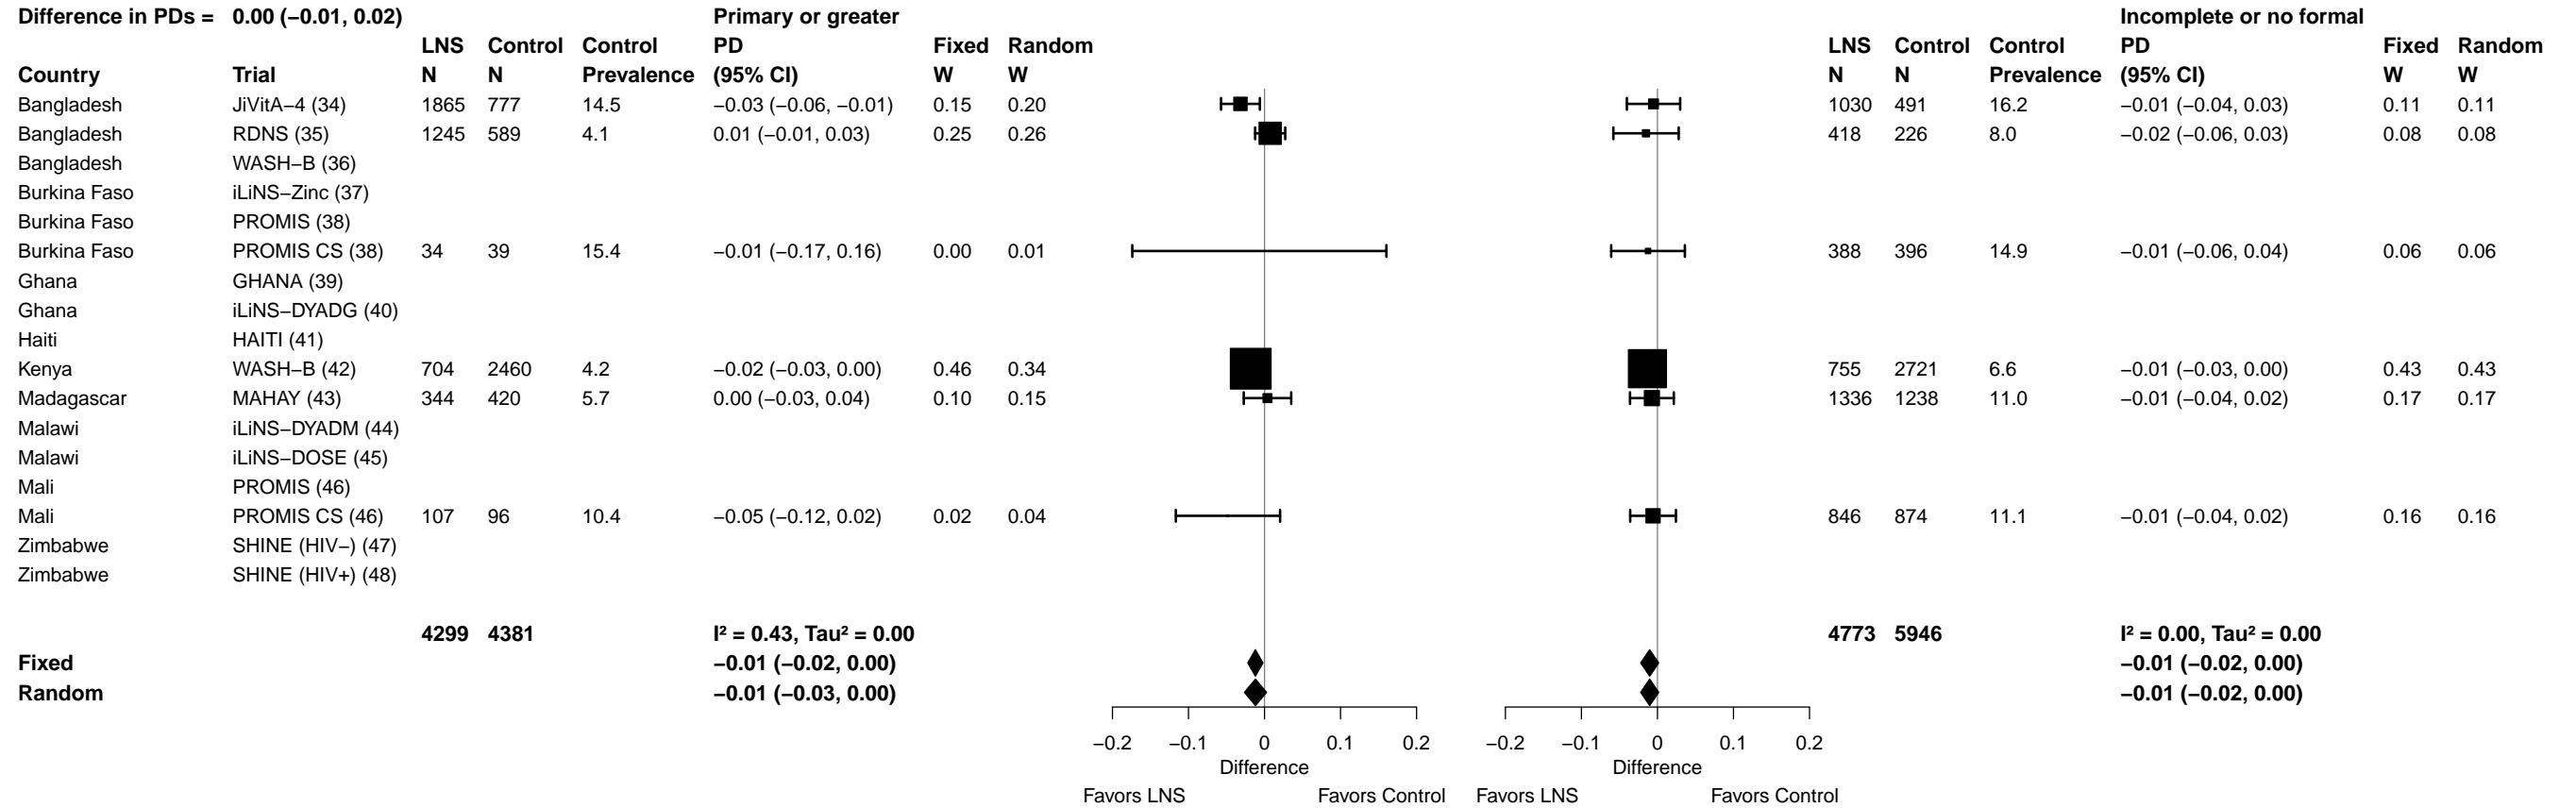



Supplemental figure 6I: Low MUAC prevalence difference

6I5: Stratified by Maternal depressive symptoms

$I^2$ -for-interaction = 0.946  
 Difference in PDs = 0.00 (-0.01, 0.01)

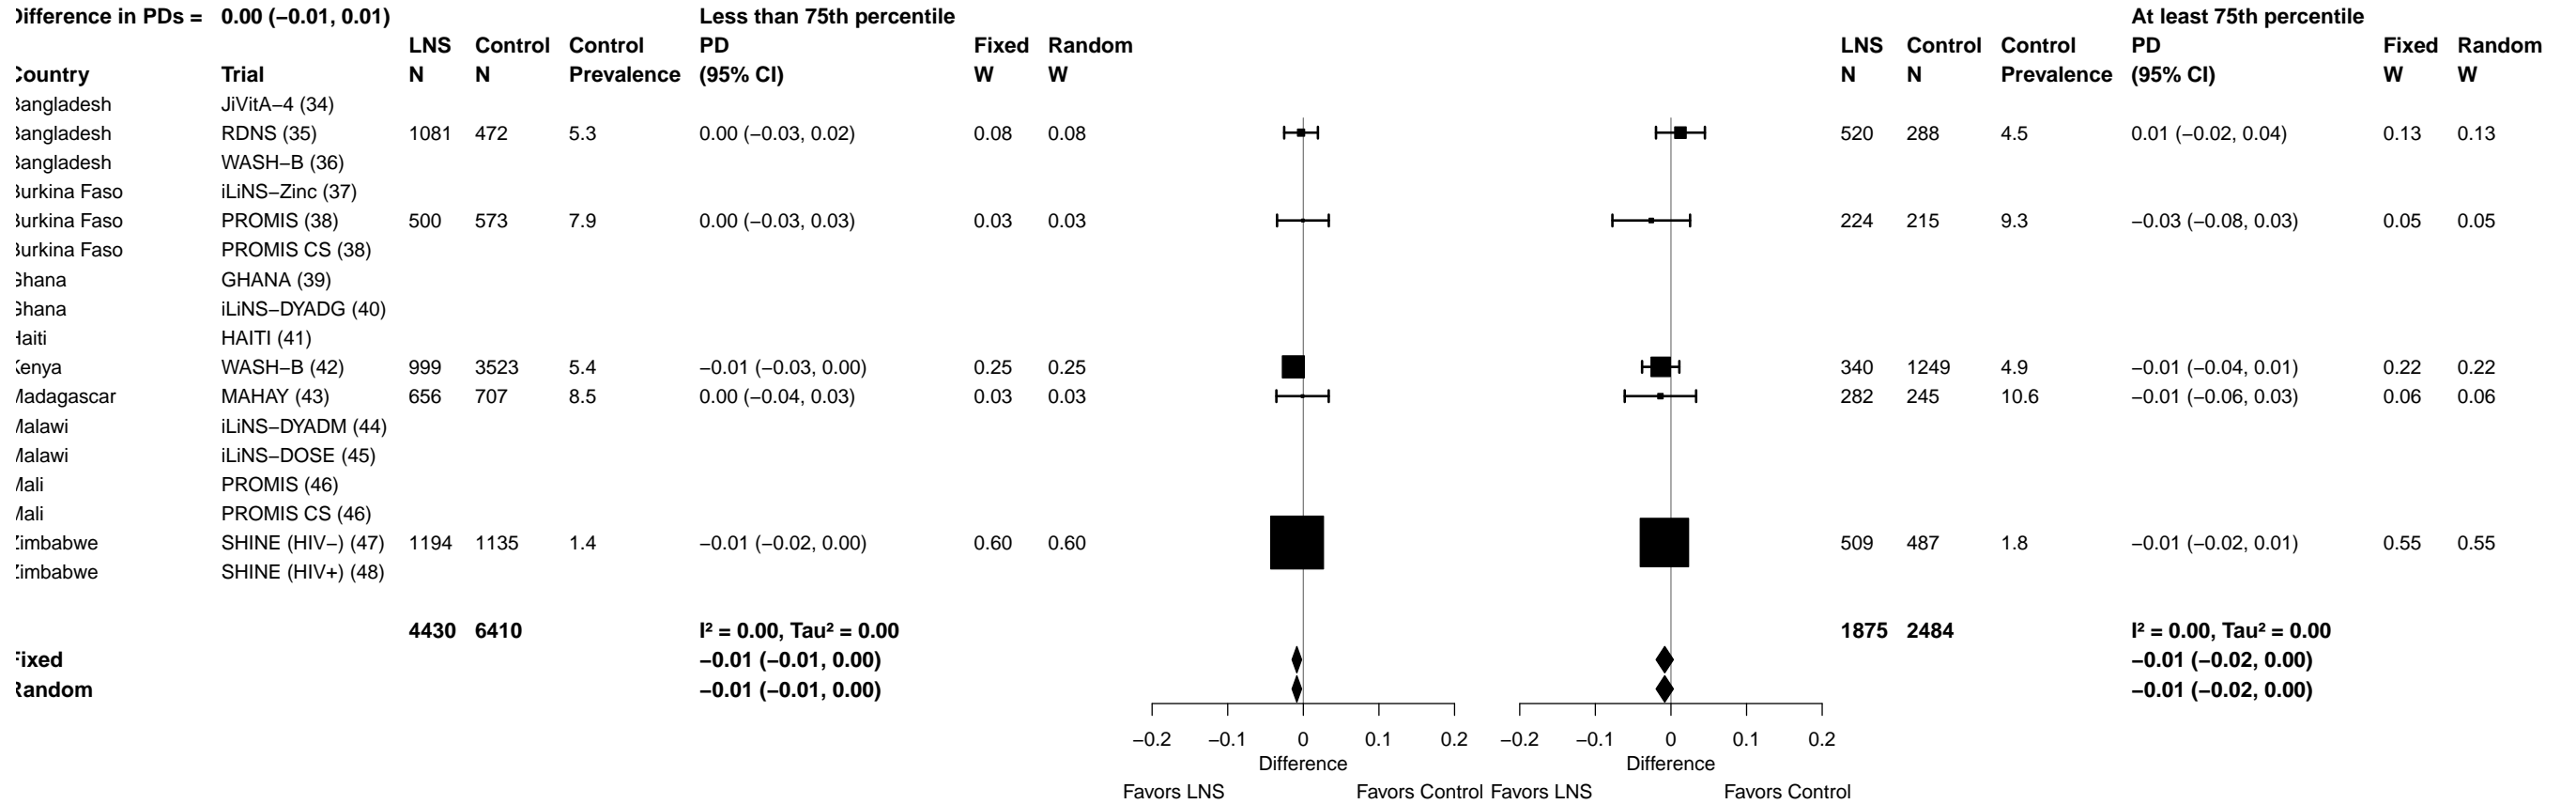

Supplemental figure 6I: Low MUAC prevalence difference

6I6: Stratified by Child sex

P-for-interaction = 0.032

Difference in PDs = -0.01 (-0.02, 0.00)

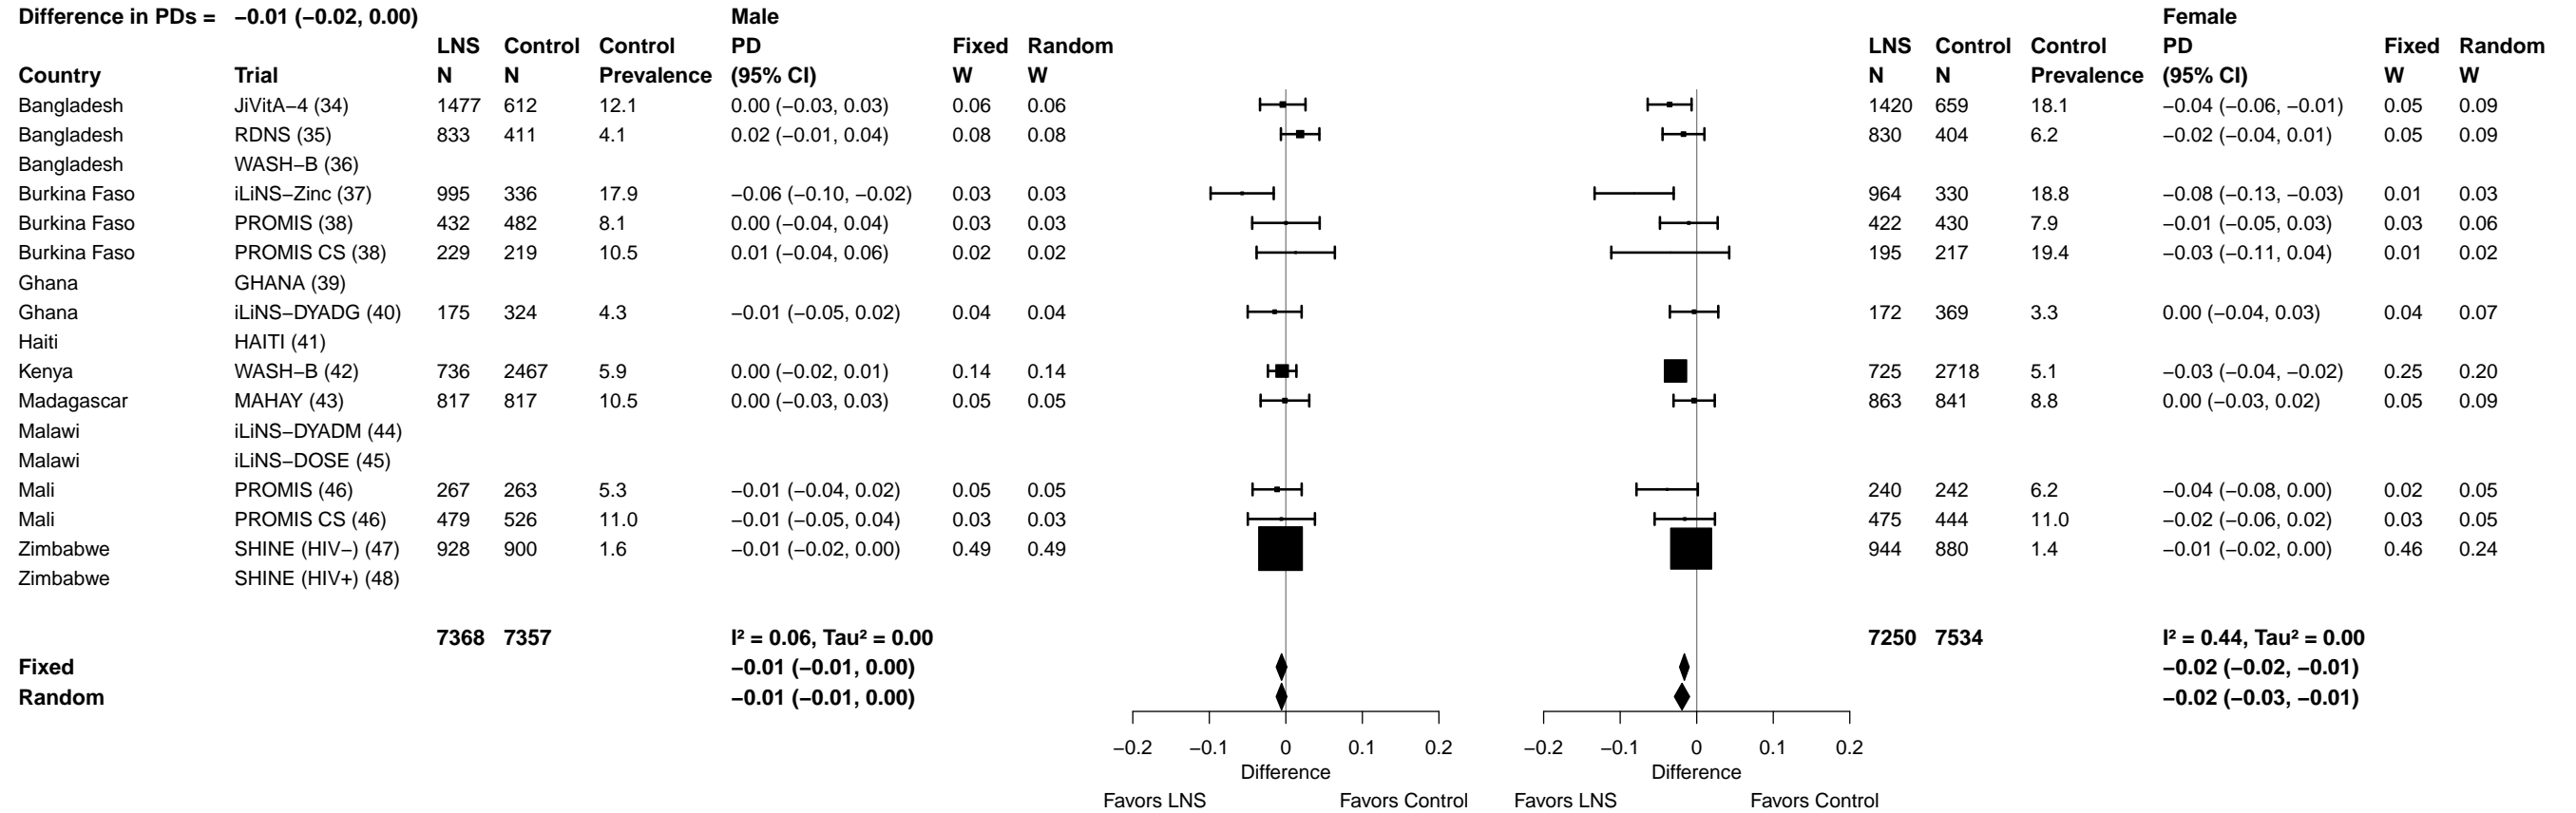

Supplemental figure 6I: Low MUAC prevalence difference

6I7: Stratified by Child birth order

P-for-interaction = 0.032  
 Difference in PDs = 0.02 (0.00, 0.03)

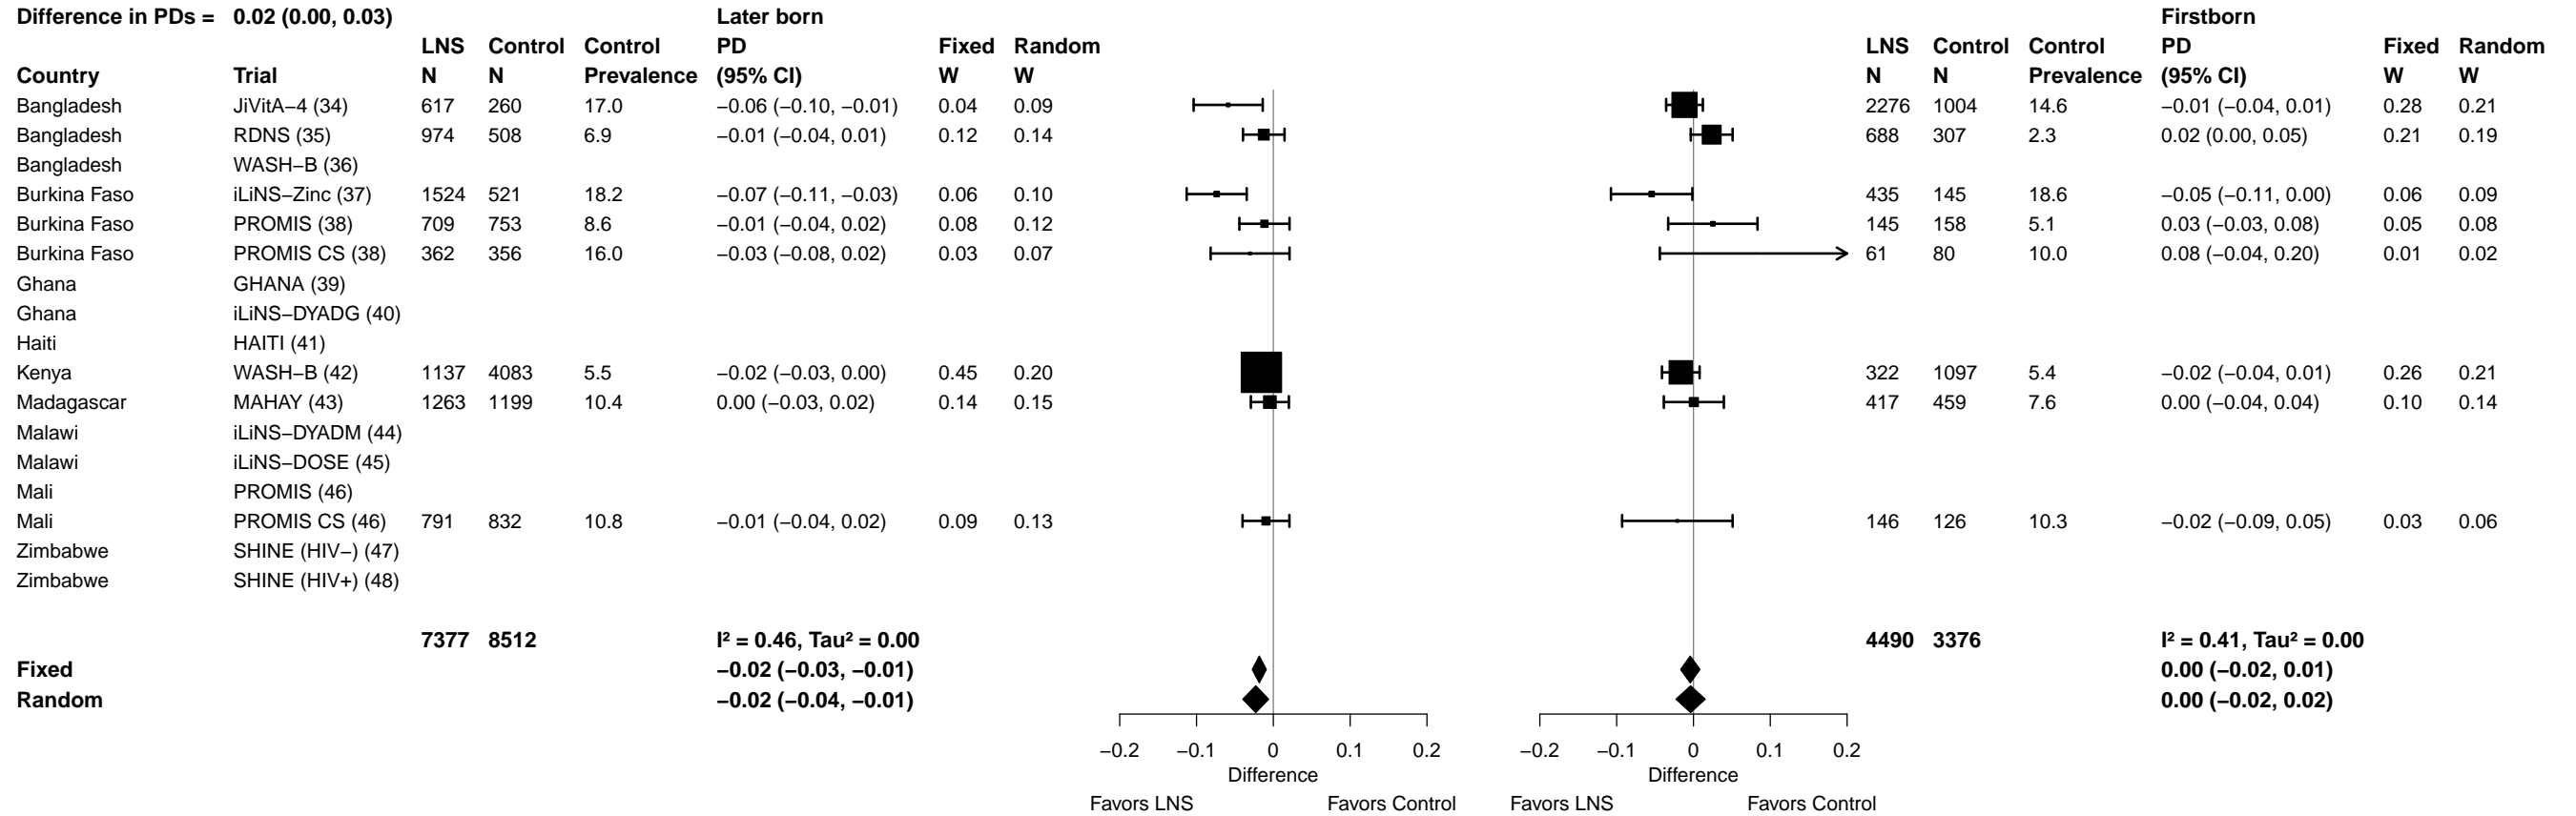

6I8: Stratified by Child baseline anthropometric status (insufficient comparisons)

### Supplemental figure 6J: Acute malnutrition prevalence ratio

#### 6J1: Stratified by Maternal height

P-for-interaction = 0.435

Ratio of PRs = 0.90 (0.68, 1.18)

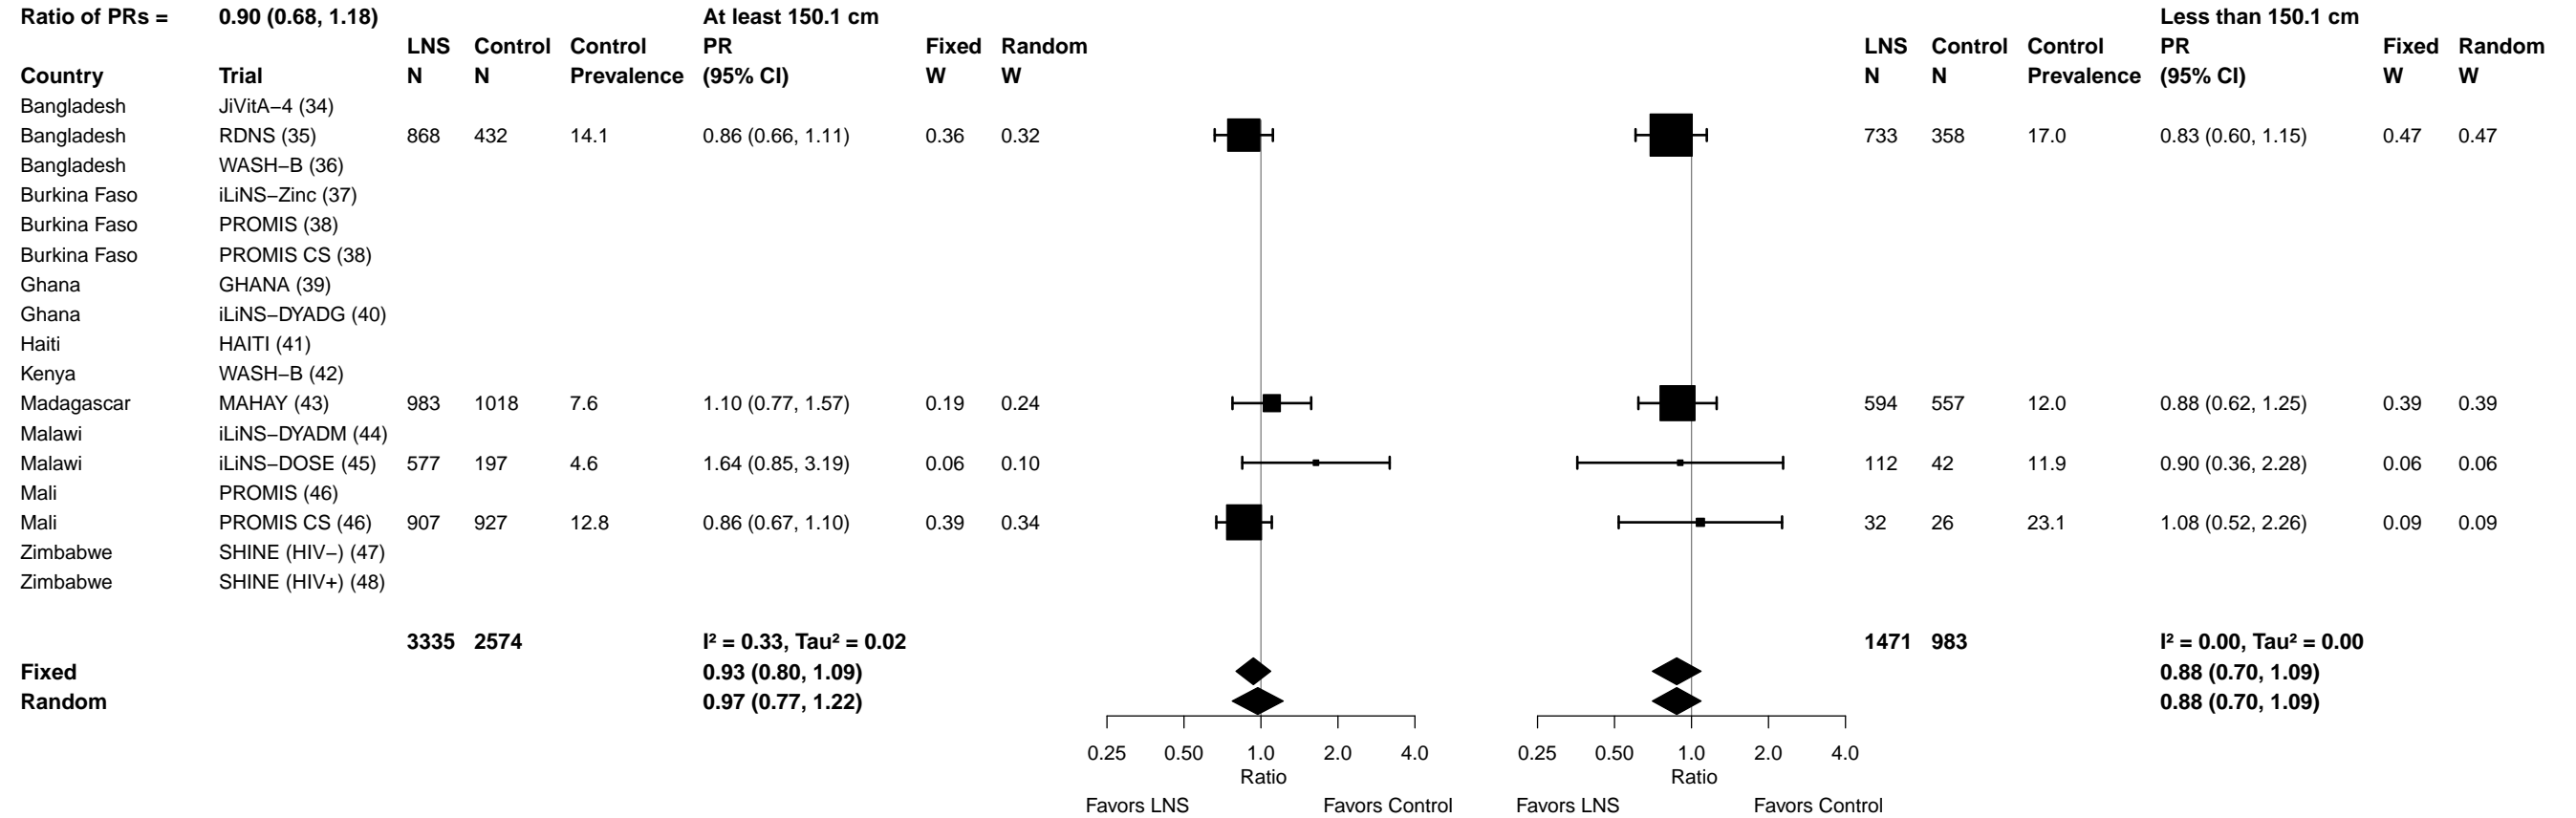

Supplemental figure 6J: Acute malnutrition prevalence ratio

6J2: Stratified by Maternal BMI

P-for-interaction = 0.490

Ratio of PRs = 1.07 (0.88, 1.30)

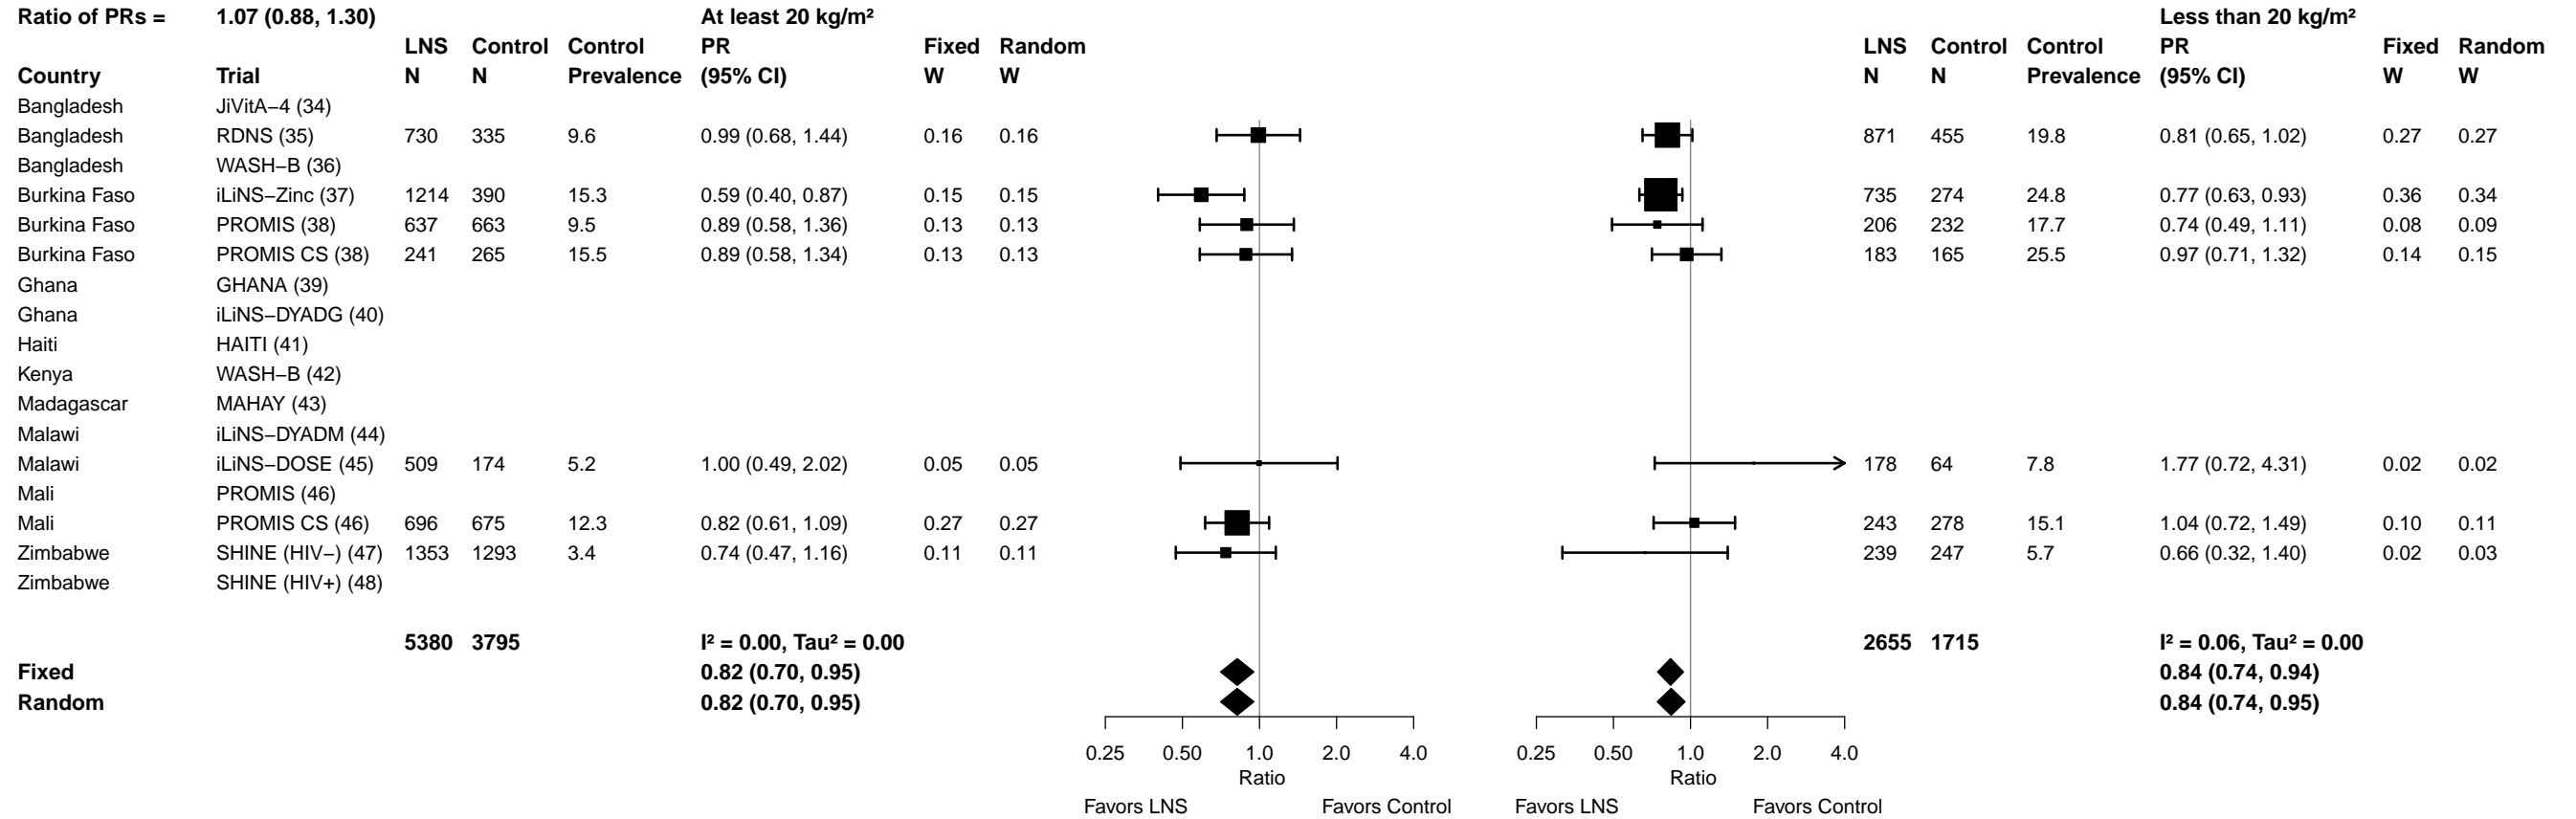

Supplemental figure 6J: Acute malnutrition prevalence ratio

6J3: Stratified by Maternal age

P-for-interaction = 0.429

Ratio of PRs = 1.06 (0.91, 1.23)

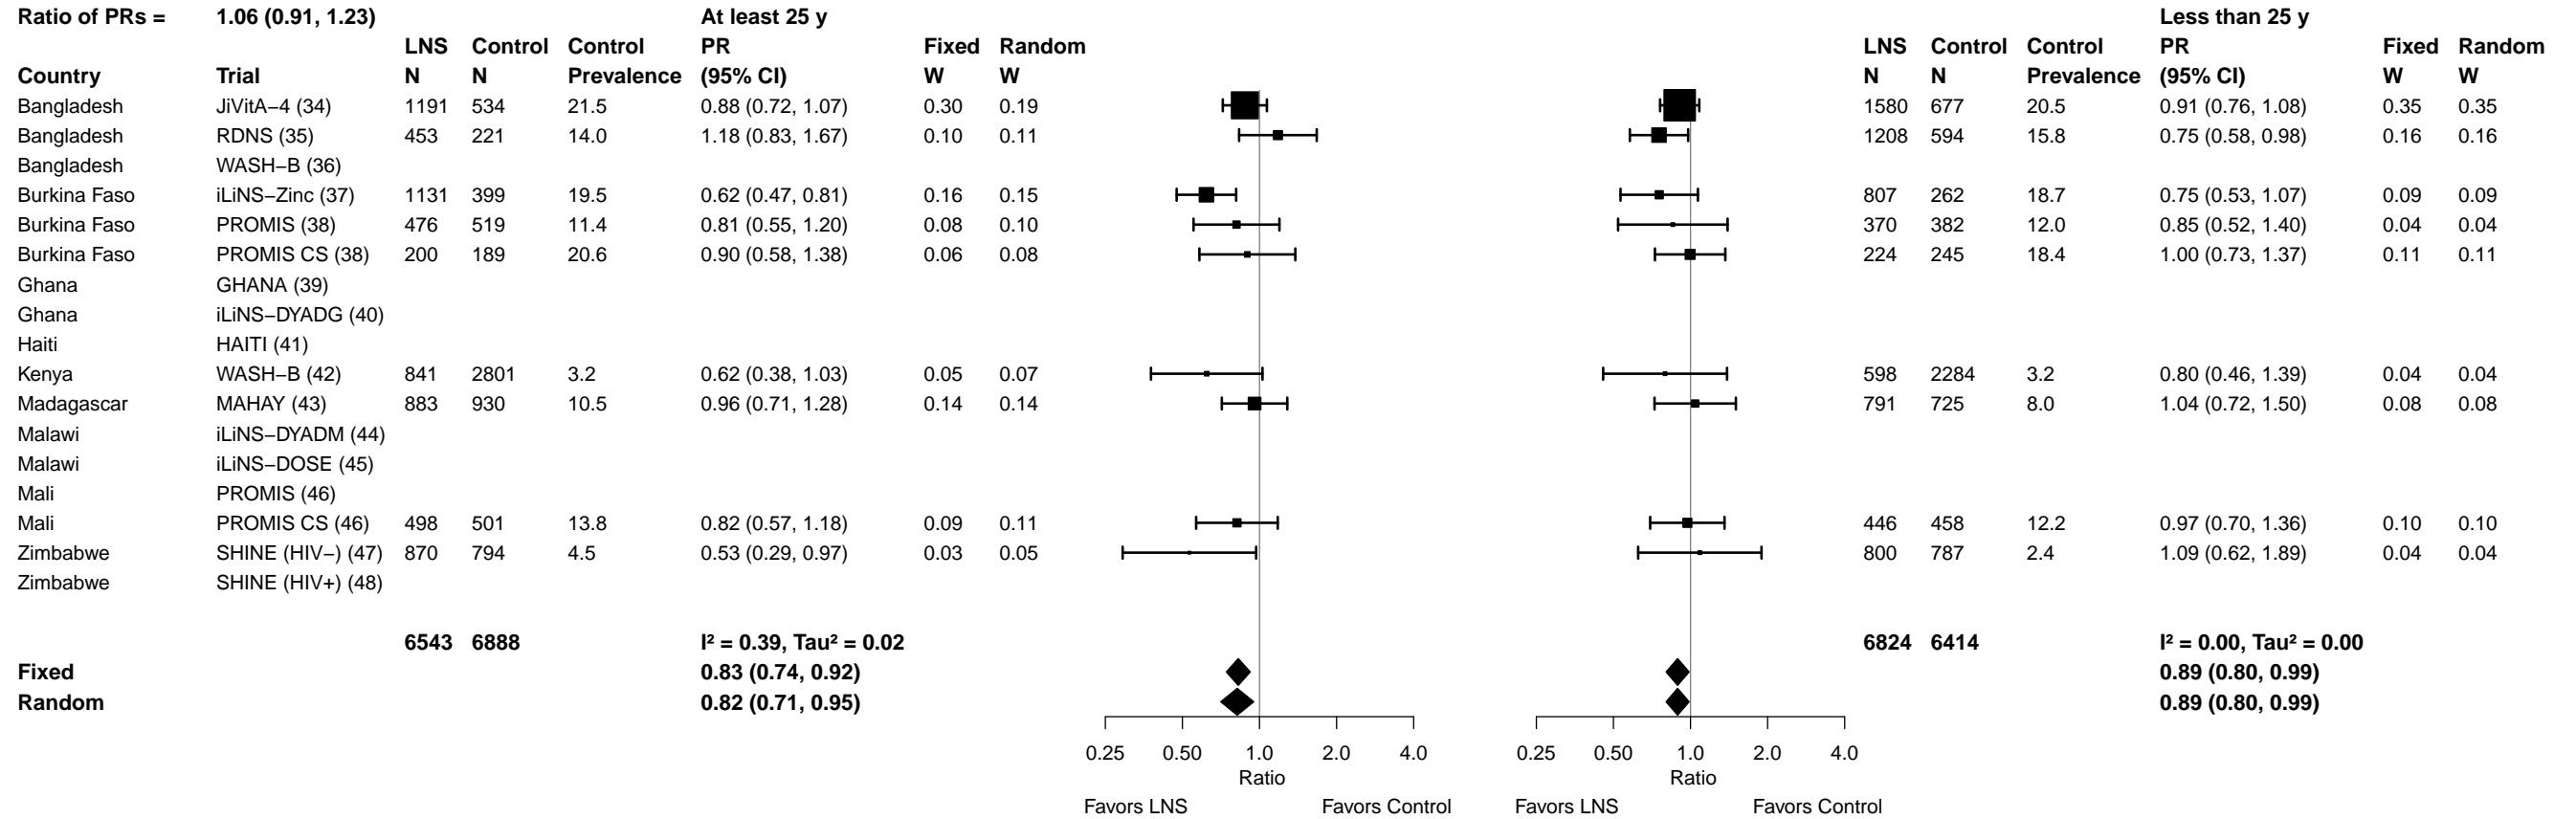

Supplemental figure 6J: Acute malnutrition prevalence ratio

6J4: Stratified by Maternal education

P-for-interaction = 0.659

Ratio of PRs = 1.04 (0.86, 1.26)

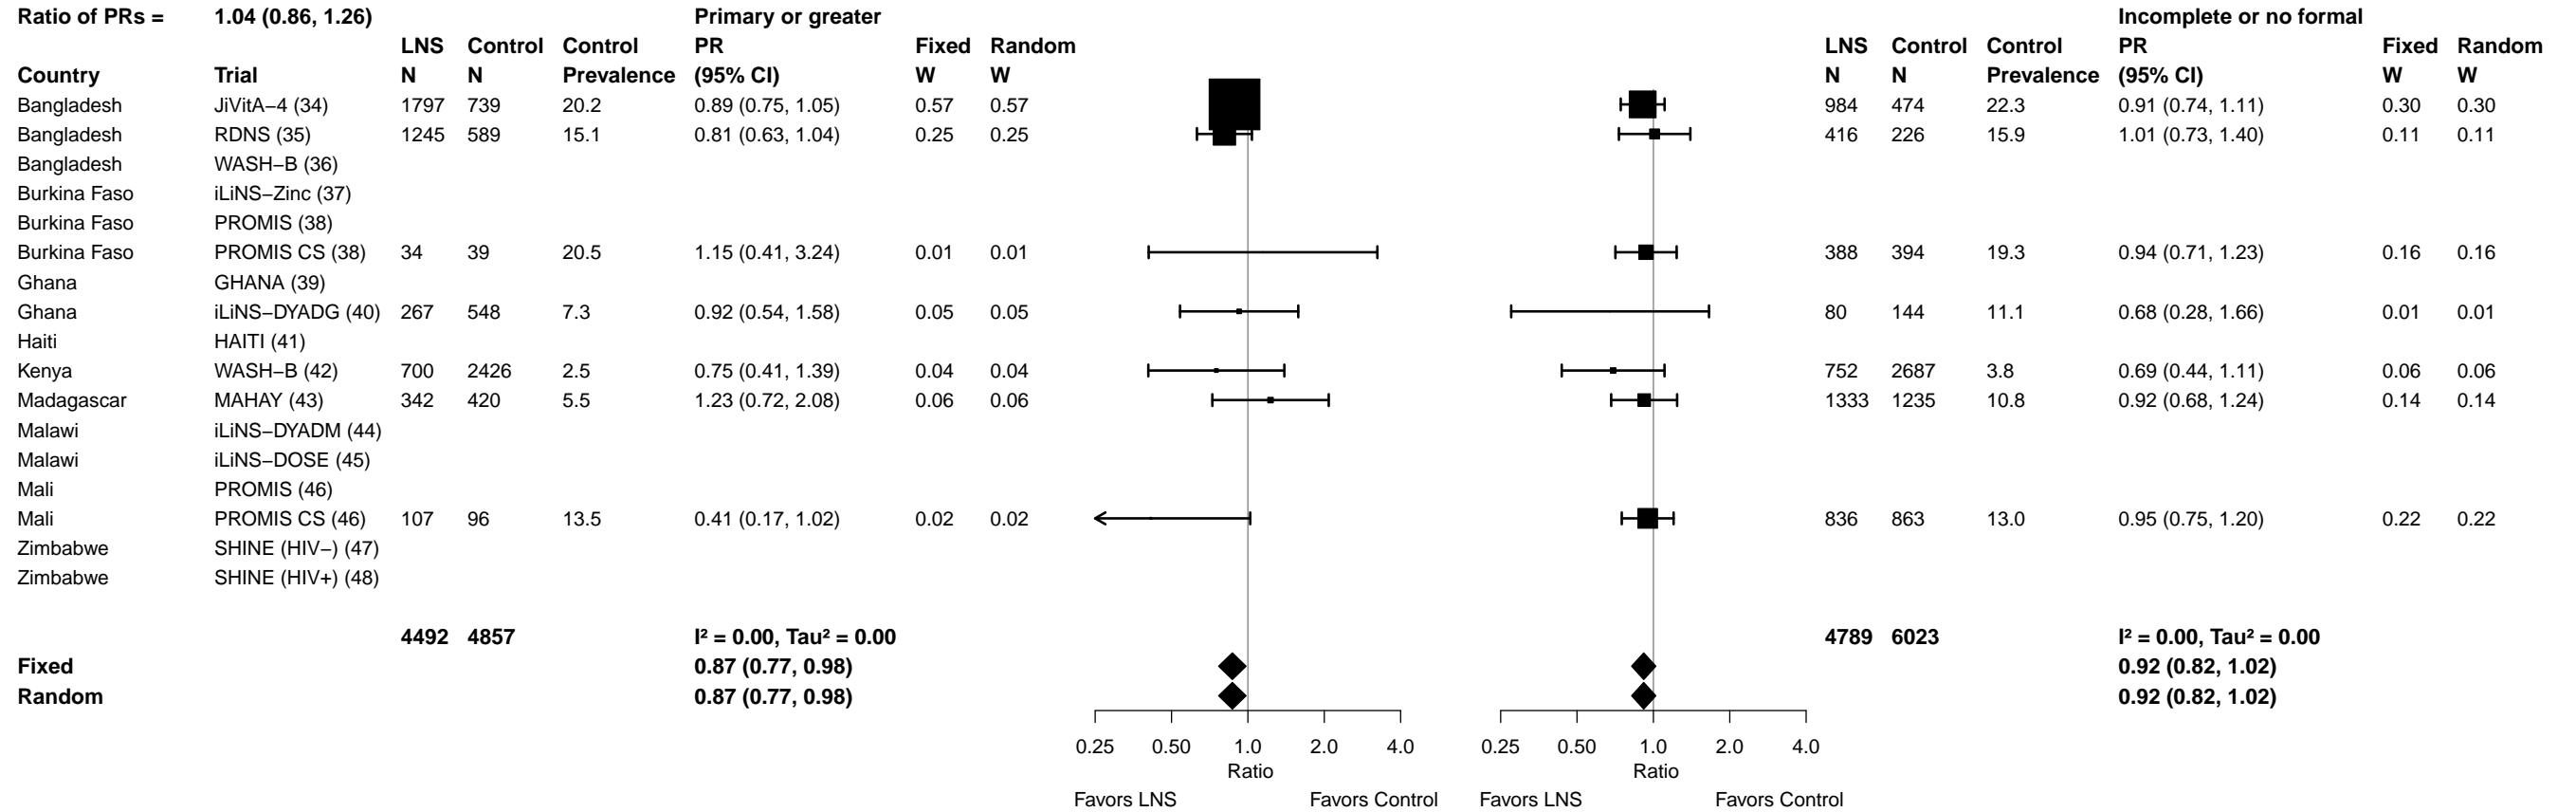

Supplemental figure 6J: Acute malnutrition prevalence ratio

6J5: Stratified by Maternal depressive symptoms

P-for-interaction = 0.532

Ratio of PRs = 1.08 (0.84, 1.39)

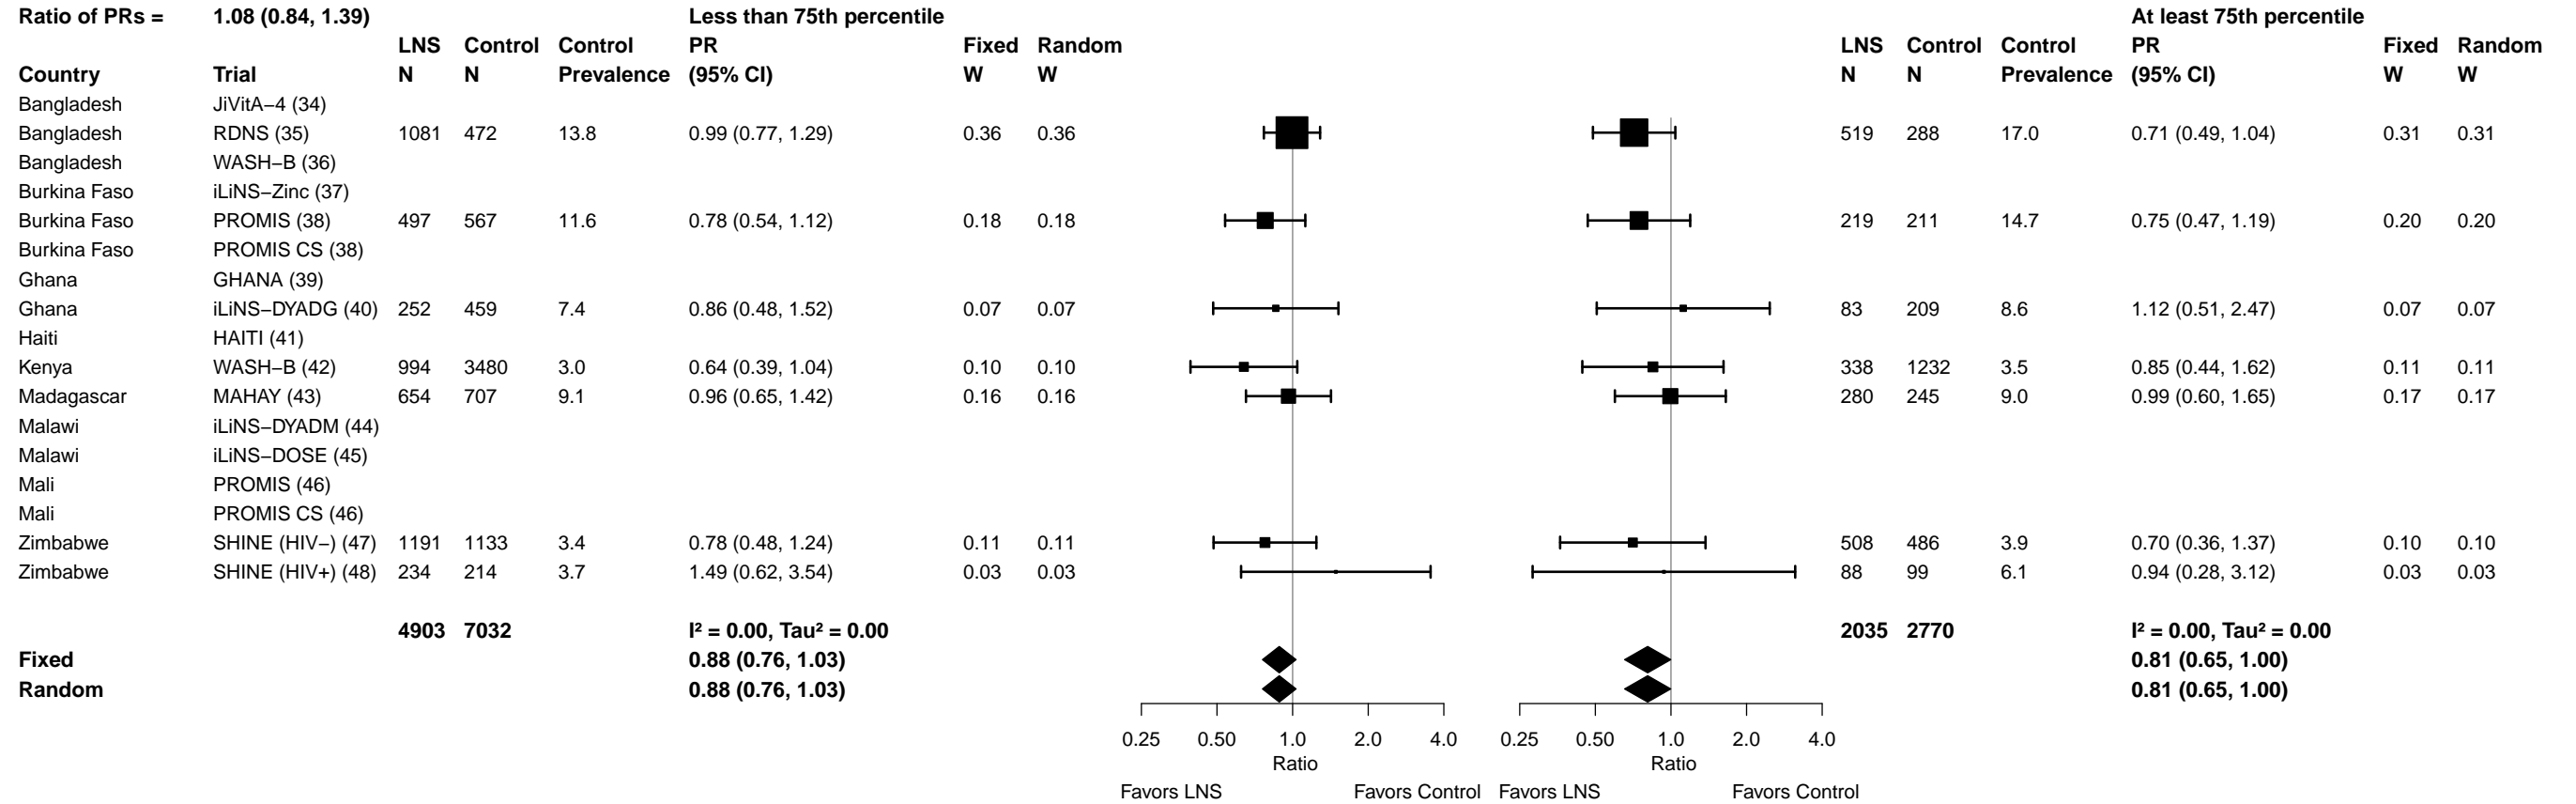



Supplemental figure 6J: Acute malnutrition prevalence ratio

6J6: Stratified by Child sex

P-for-interaction = 0.307  
 Ratio of PRs = 0.93 (0.81, 1.07)

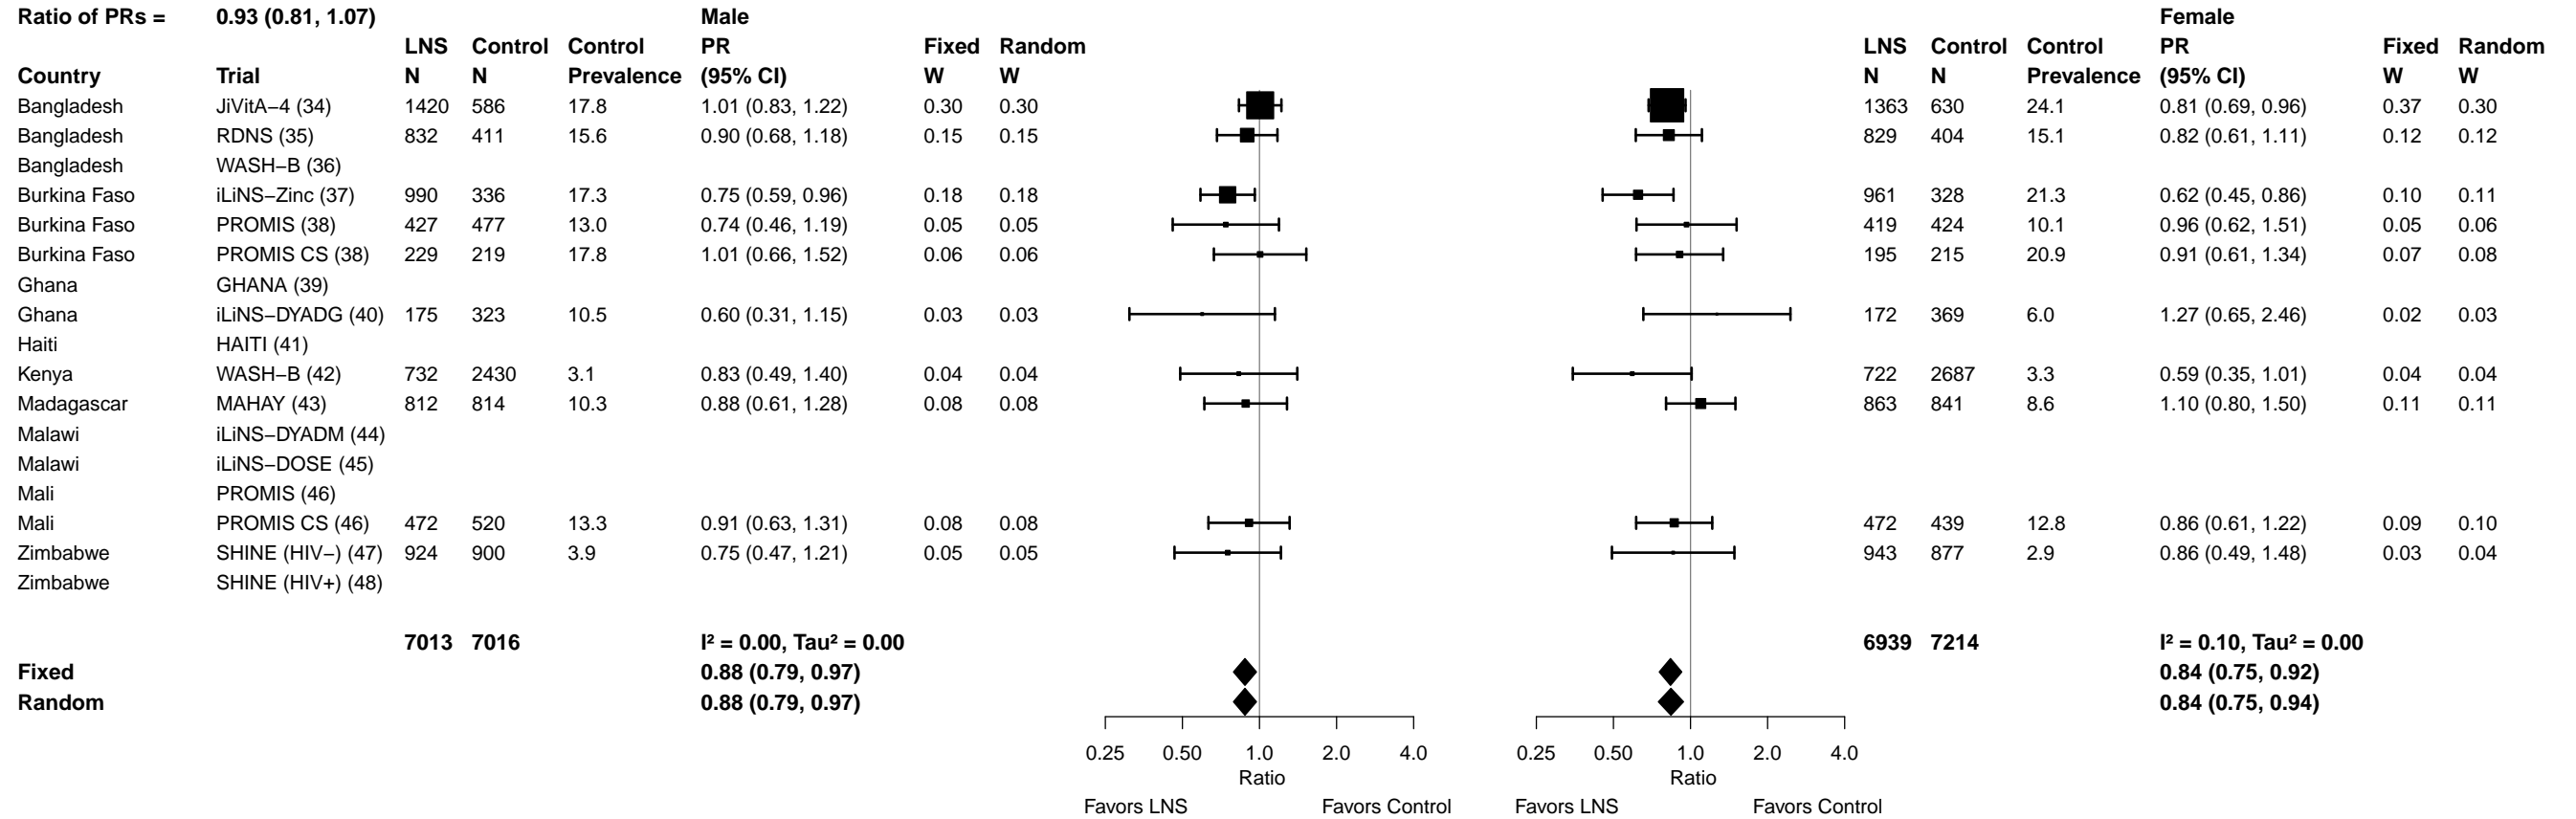

Supplemental figure 6J: Acute malnutrition prevalence ratio

6J7: Stratified by Child birth order

P-for-interaction = 0.124

Ratio of PRs = 1.14 (0.96, 1.35)

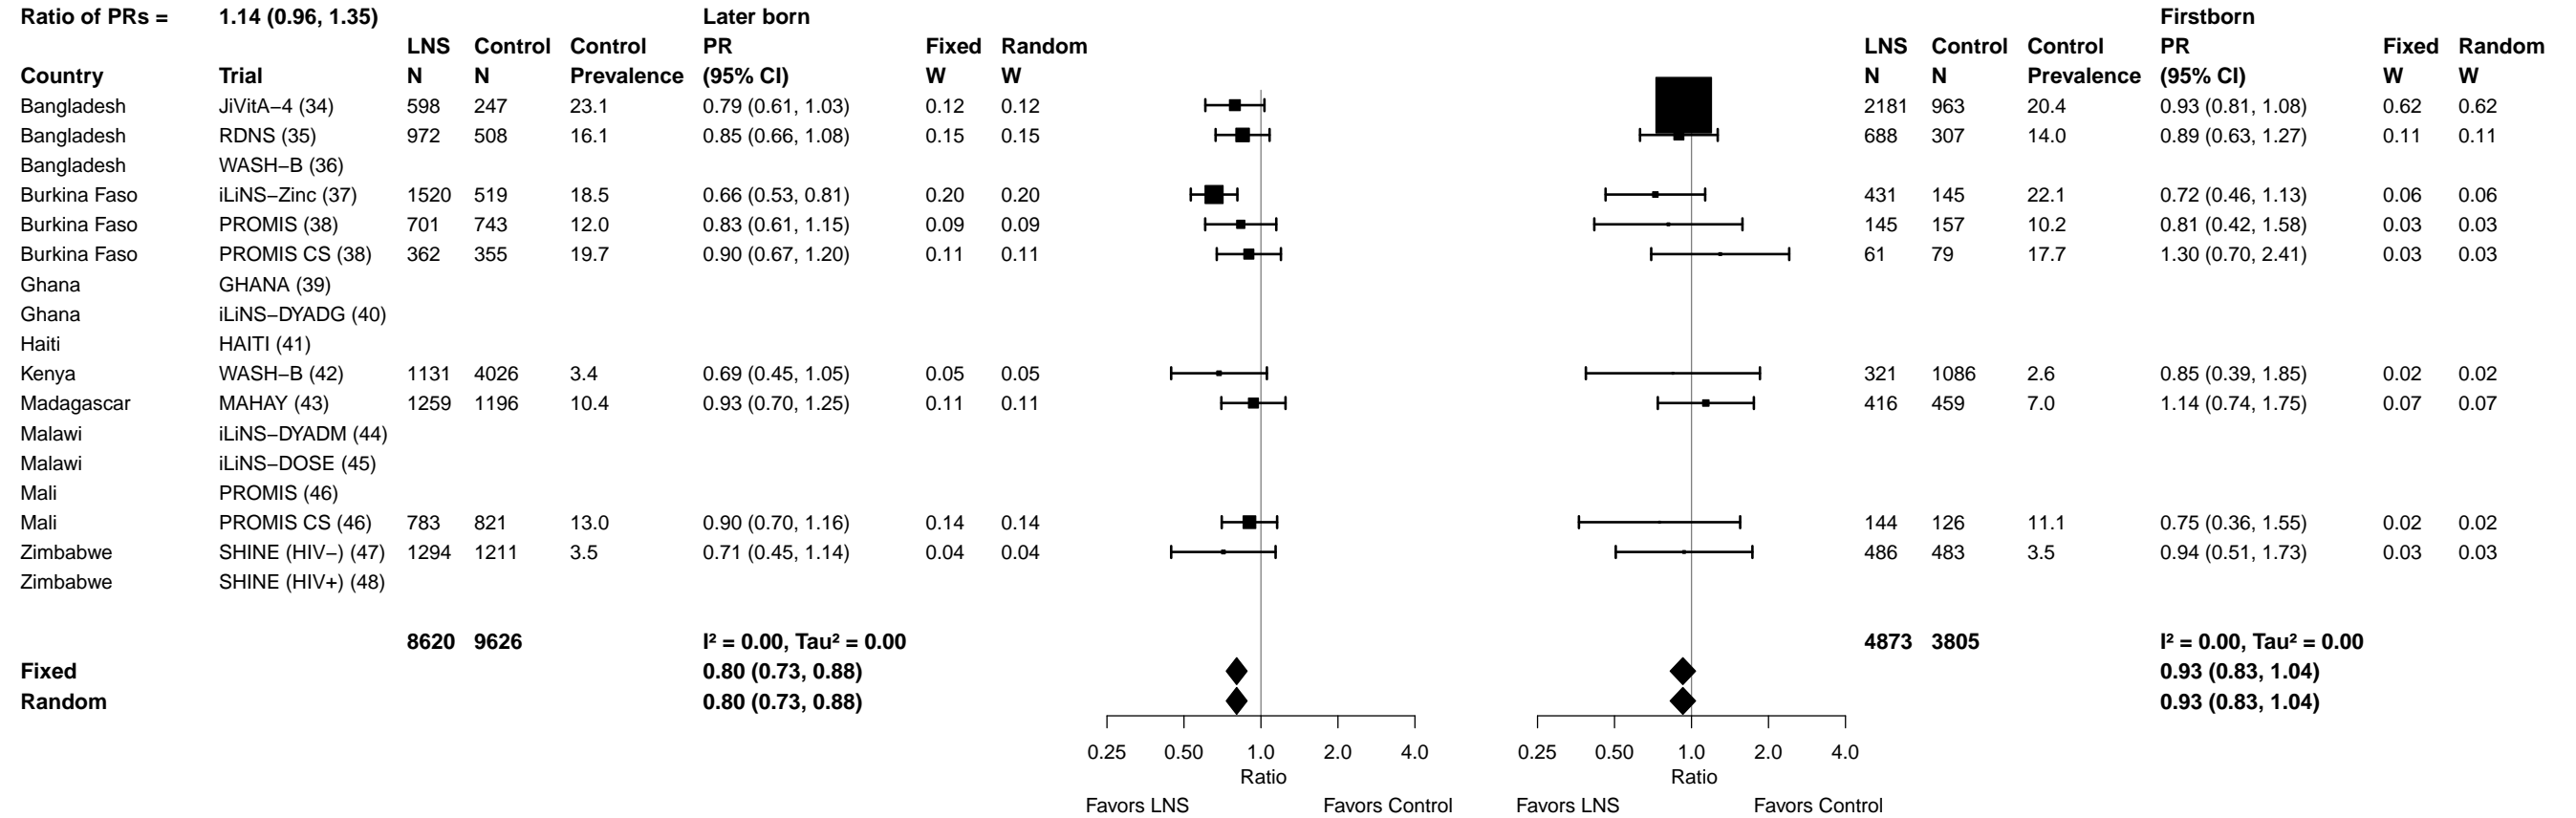

Supplemental figure 6J: Acute malnutrition prevalence ratio

6J8: Stratified by Child baseline anthropometric status

P-for-interaction = 0.490

Ratio of PRs = 0.85 (0.53, 1.36)

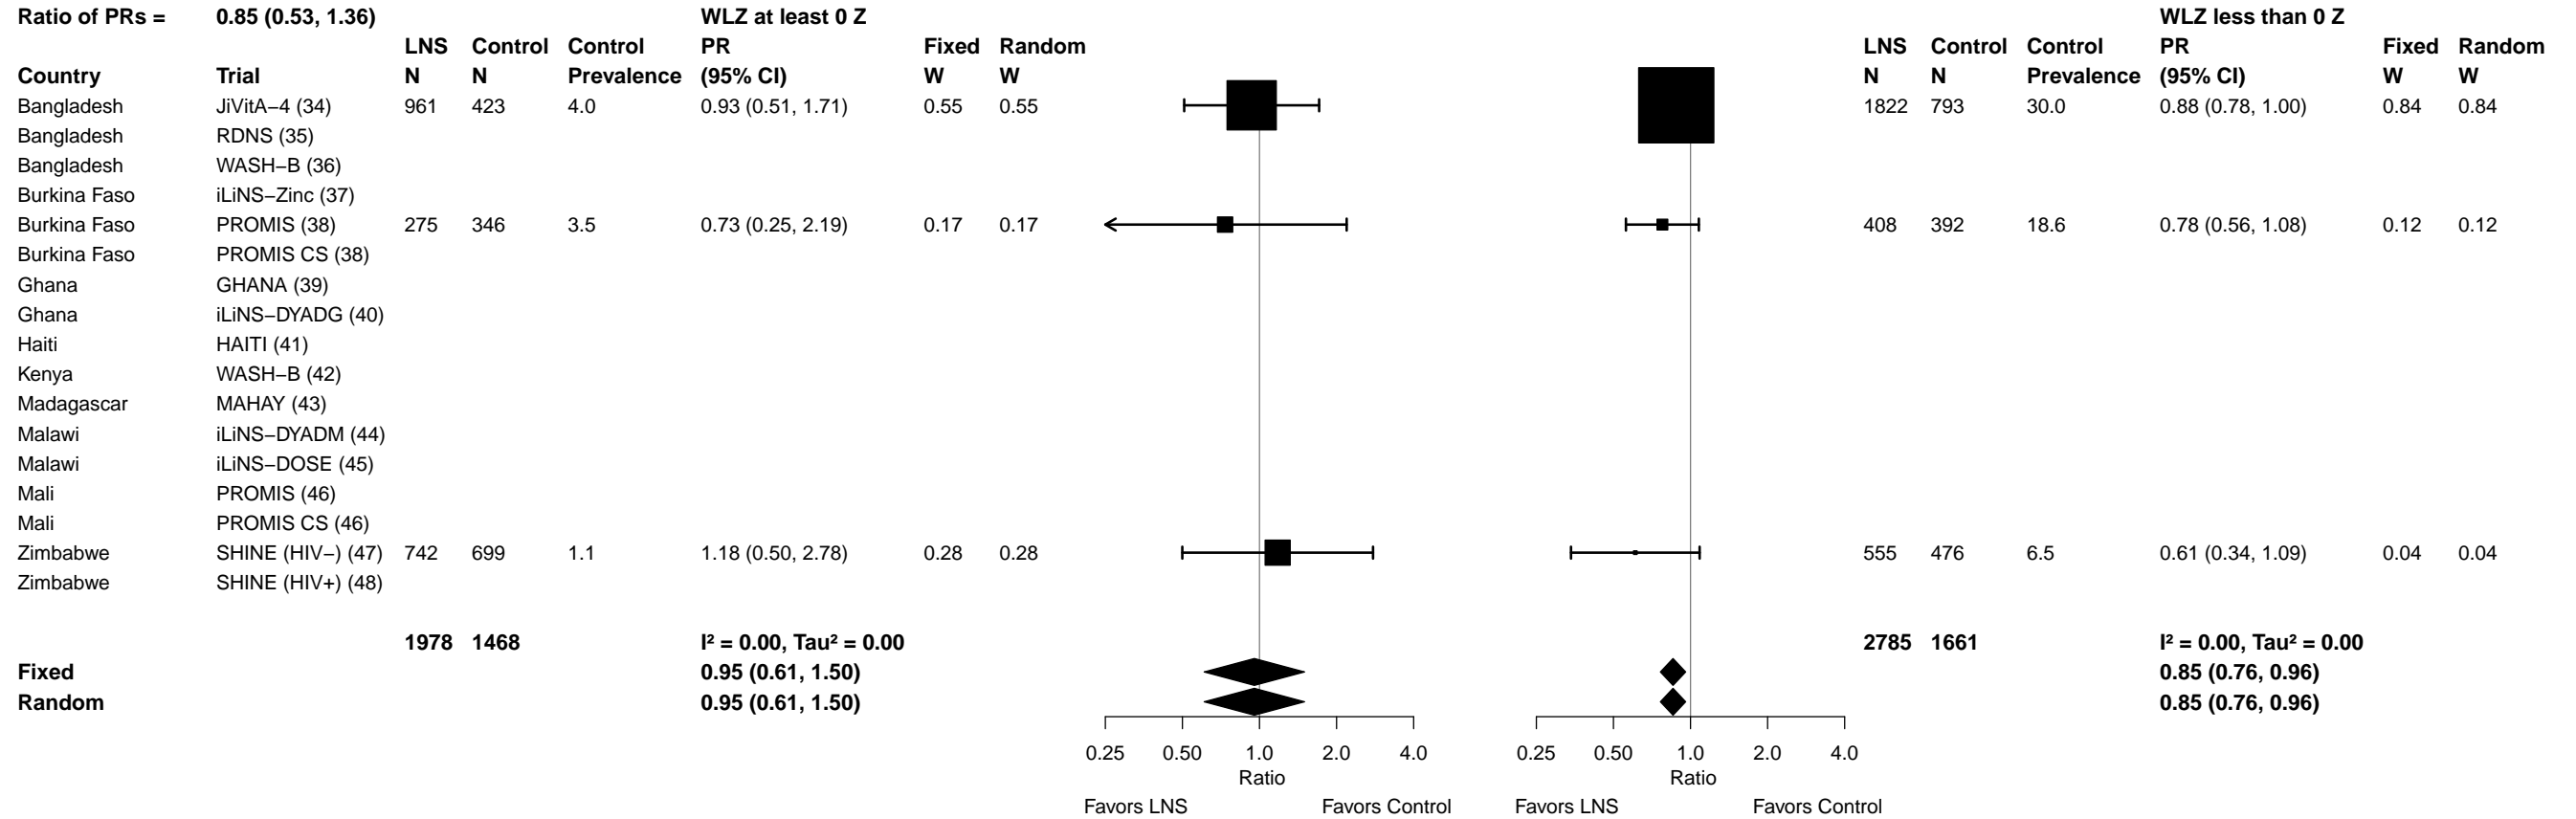

### Supplemental figure 6K: Acute malnutrition prevalence difference

#### 6K1: Stratified by Maternal height

P-for-interaction = 0.297

Difference in PDs = -0.02 (-0.05, 0.02)

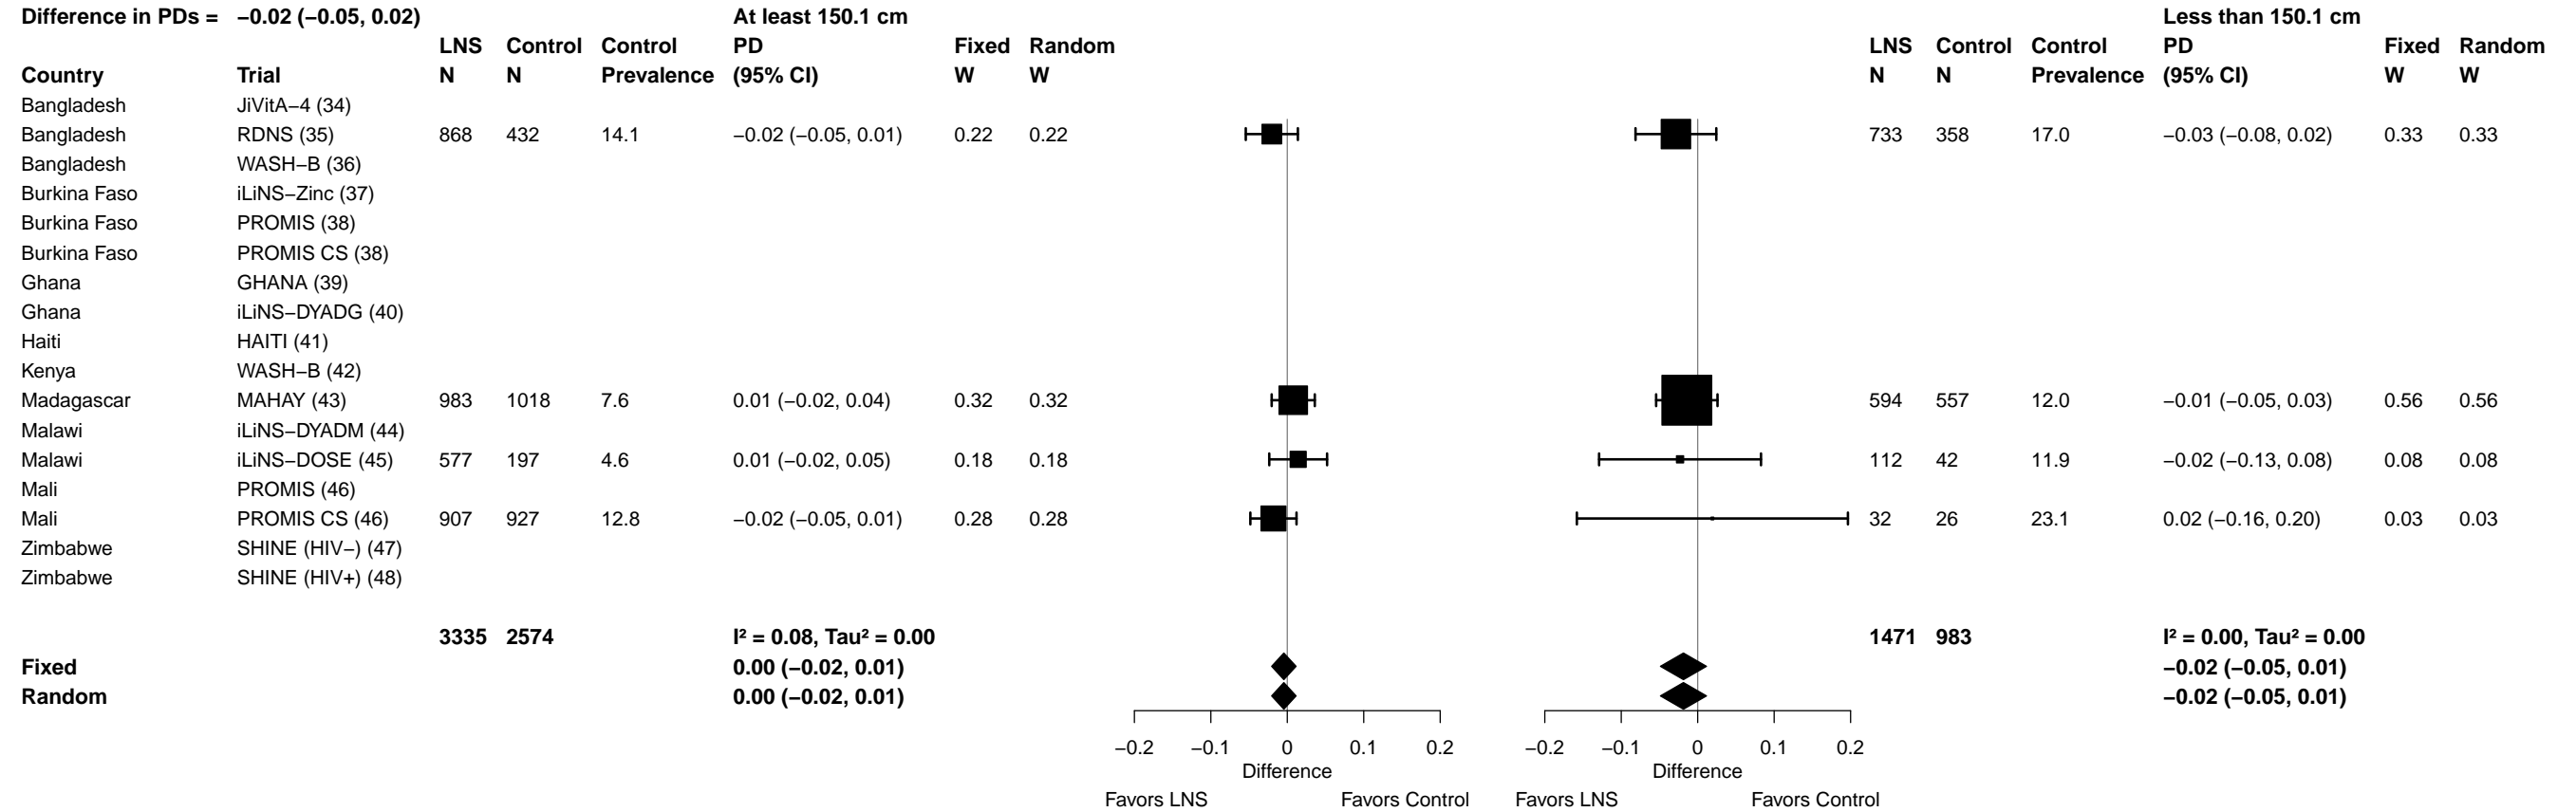

Supplemental figure 6K: Acute malnutrition prevalence difference

6K2: Stratified by Maternal BMI

P-for-interaction = 0.580

Difference in PDs = -0.01 (-0.03, 0.02)

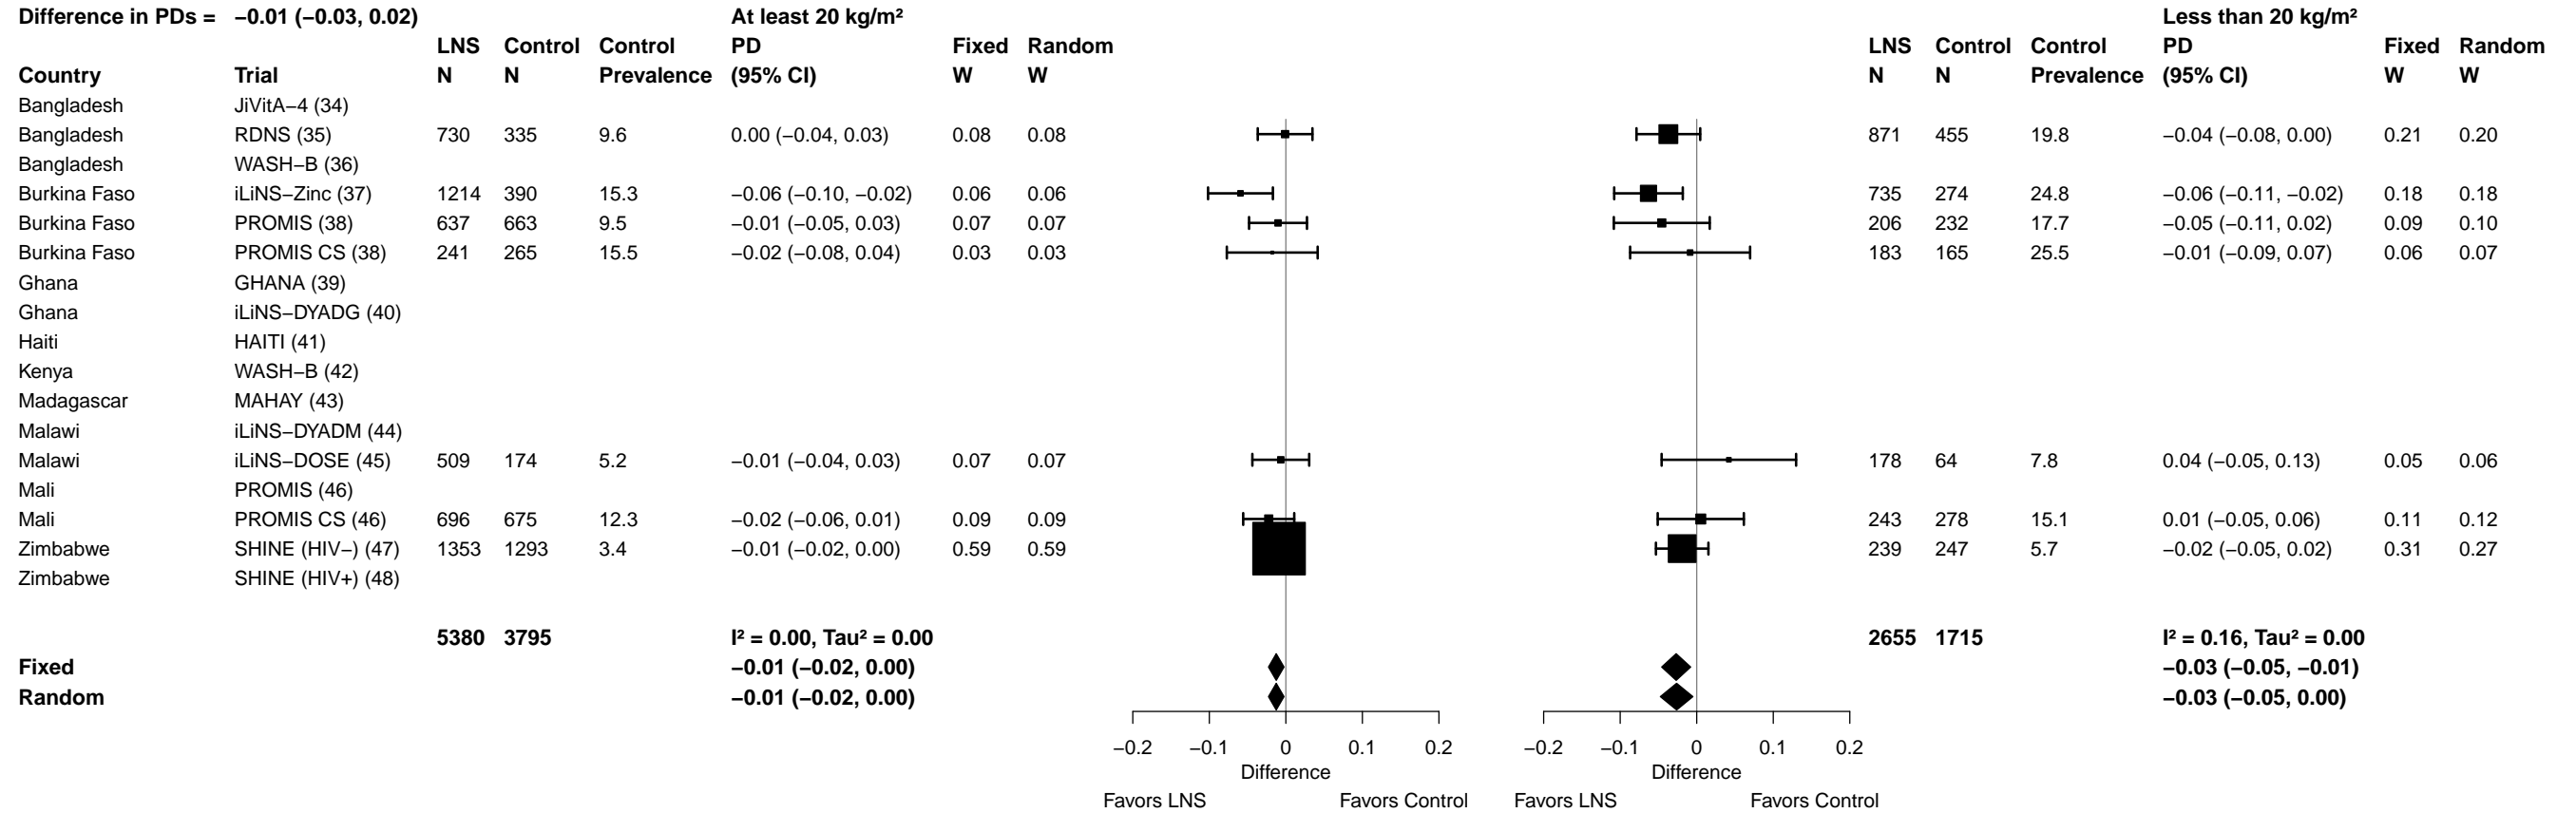

Supplemental figure 6K: Acute malnutrition prevalence difference

6K3: Stratified by Maternal age

P-for-interaction = 0.115  
 Difference in PDs = 0.01 (0.00, 0.02)

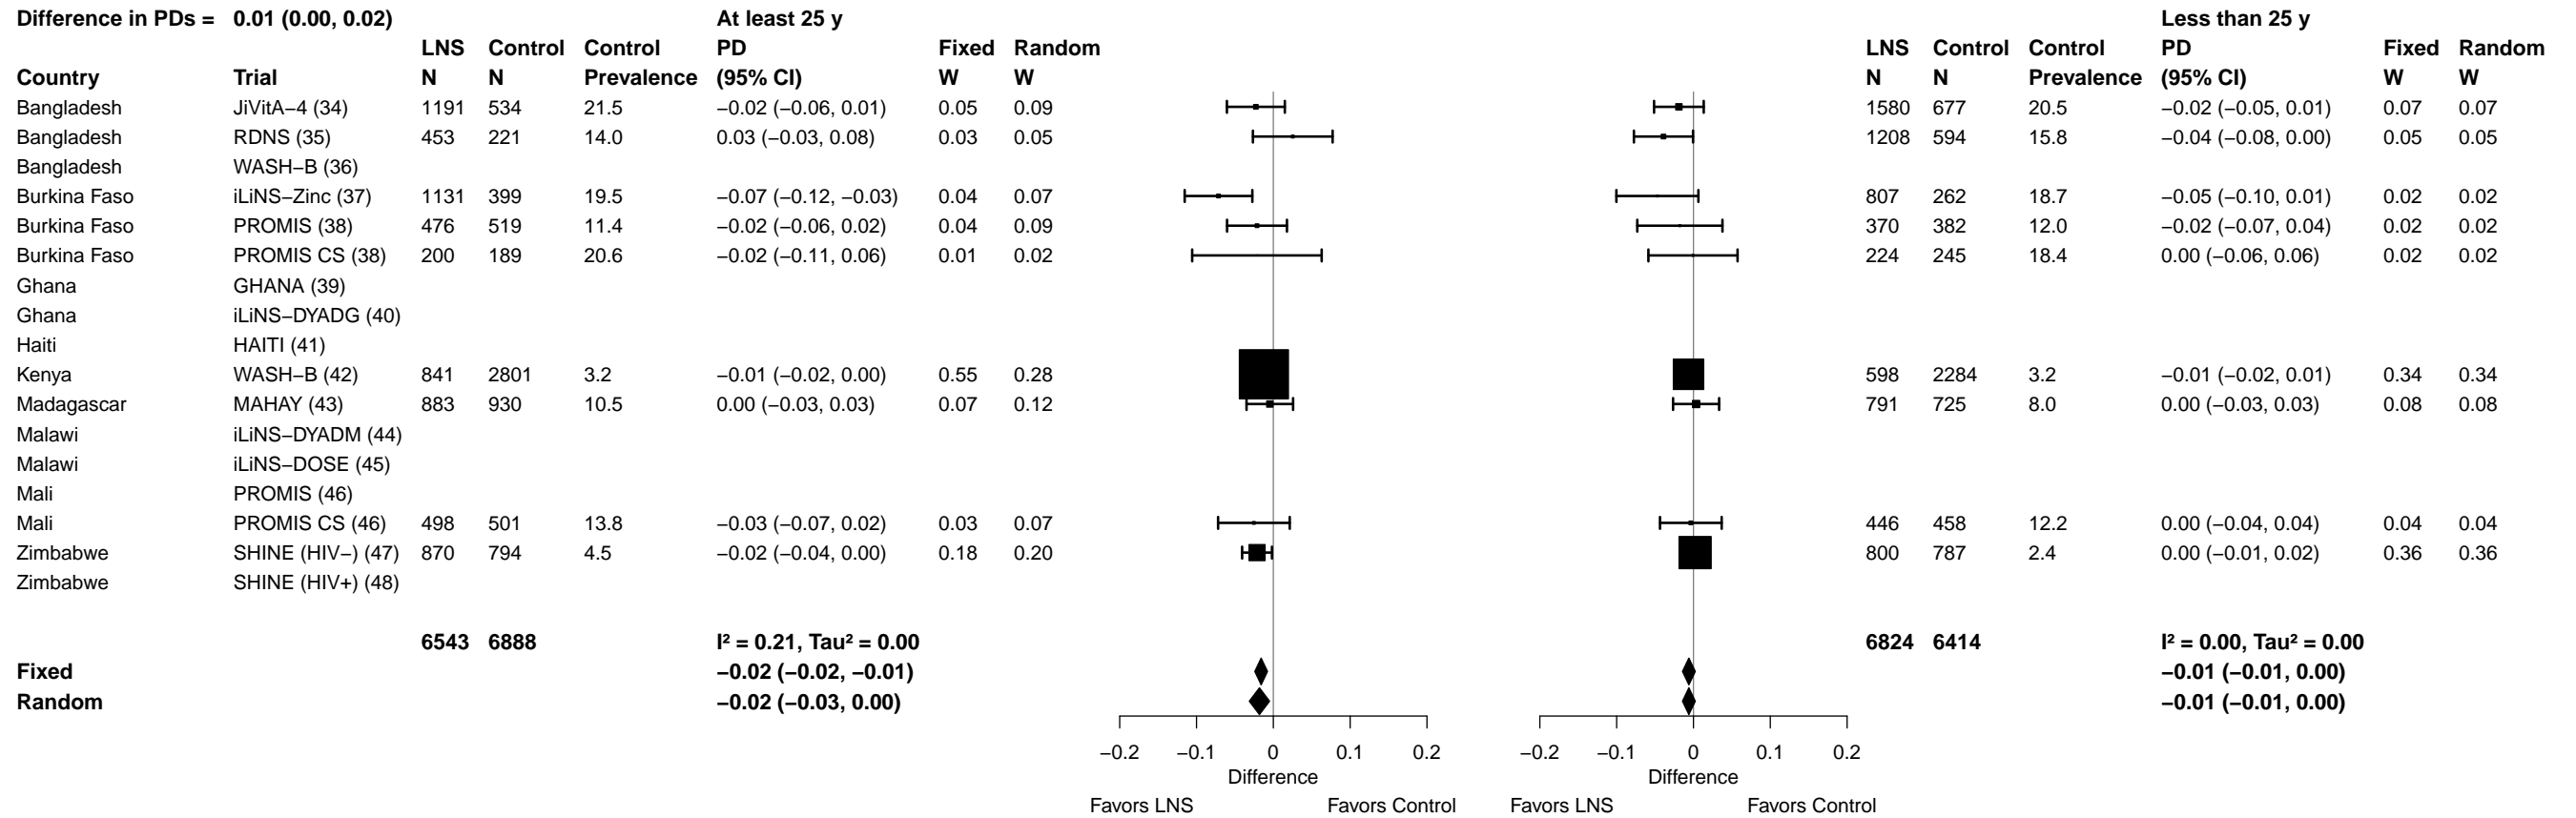

Supplemental figure 6K: Acute malnutrition prevalence difference

6K4: Stratified by Maternal education

P-for-interaction = 0.659

Difference in PDs = 0.00 (-0.02, 0.01)

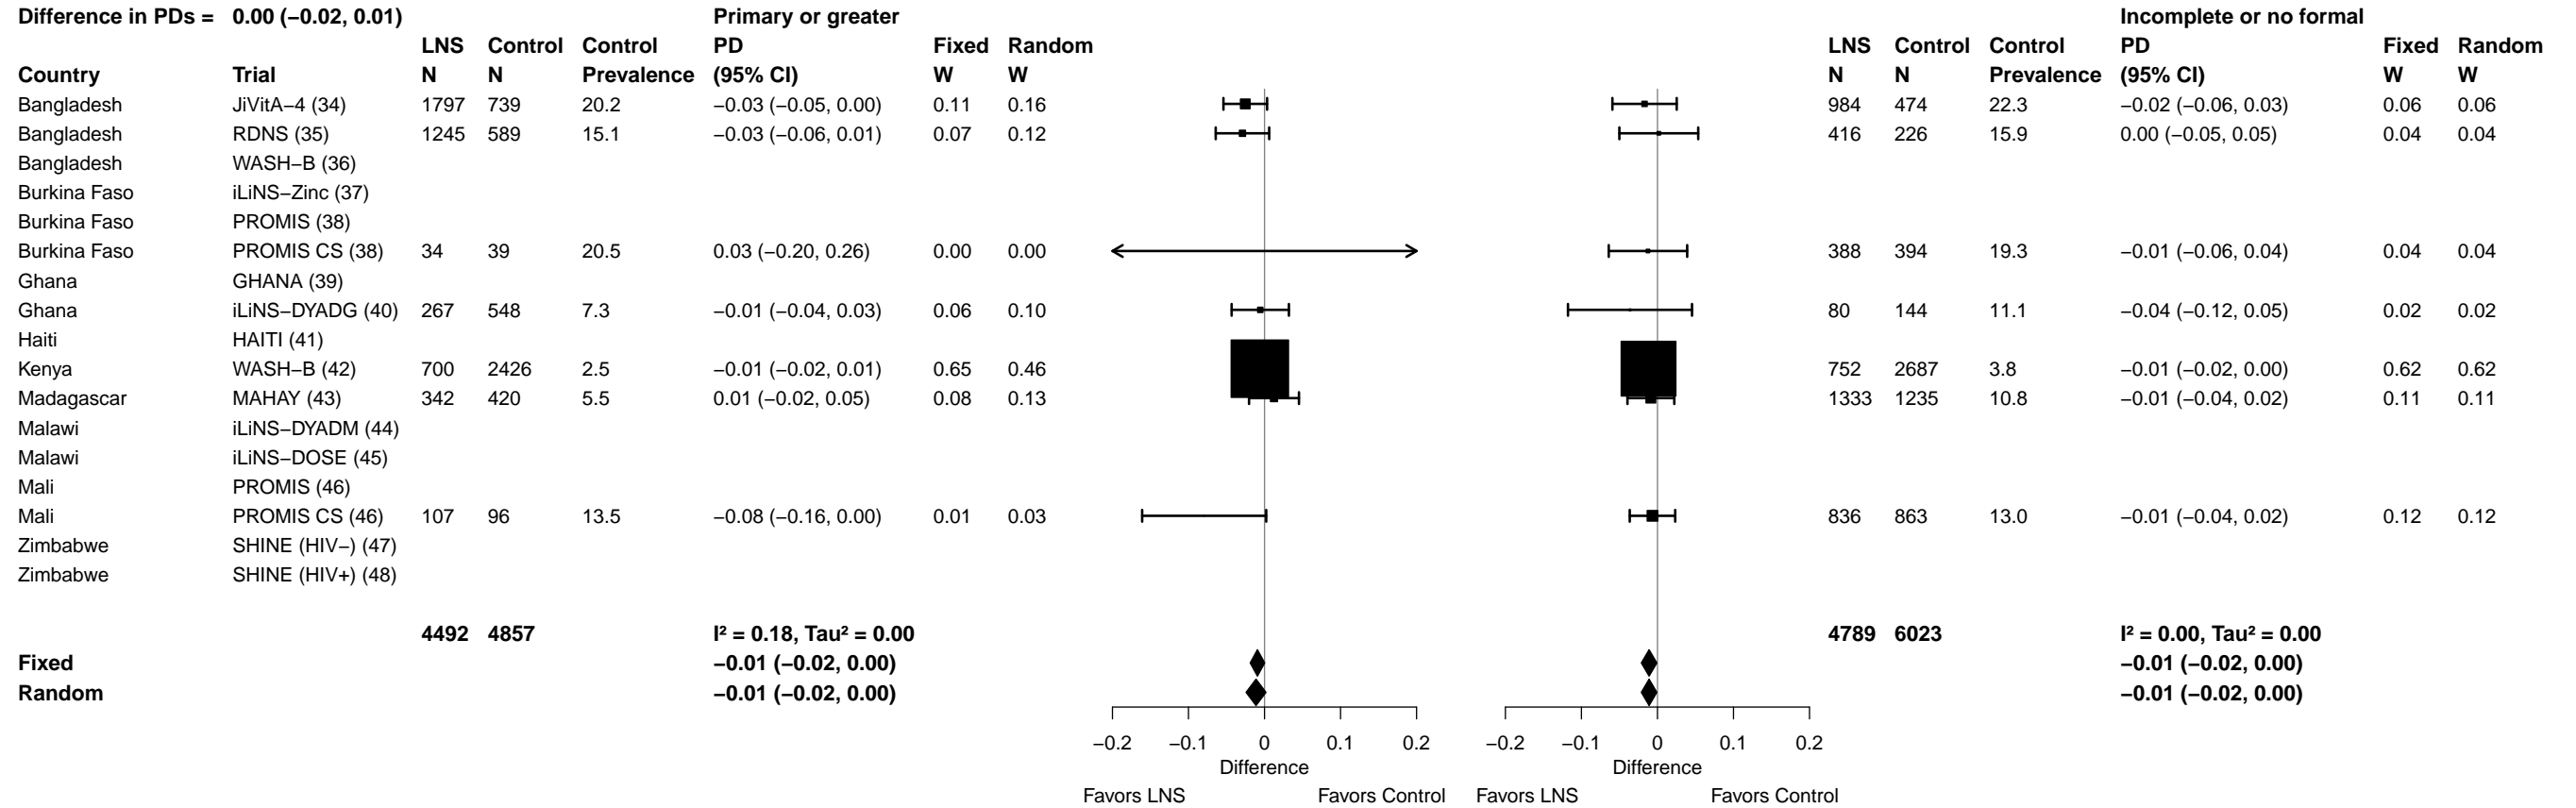

Supplemental figure 6K: Acute malnutrition prevalence difference

6K5: Stratified by Maternal depressive symptoms

$I^2$ -for-interaction = 0.781

Difference in PDs = 0.00 (-0.01, 0.02)

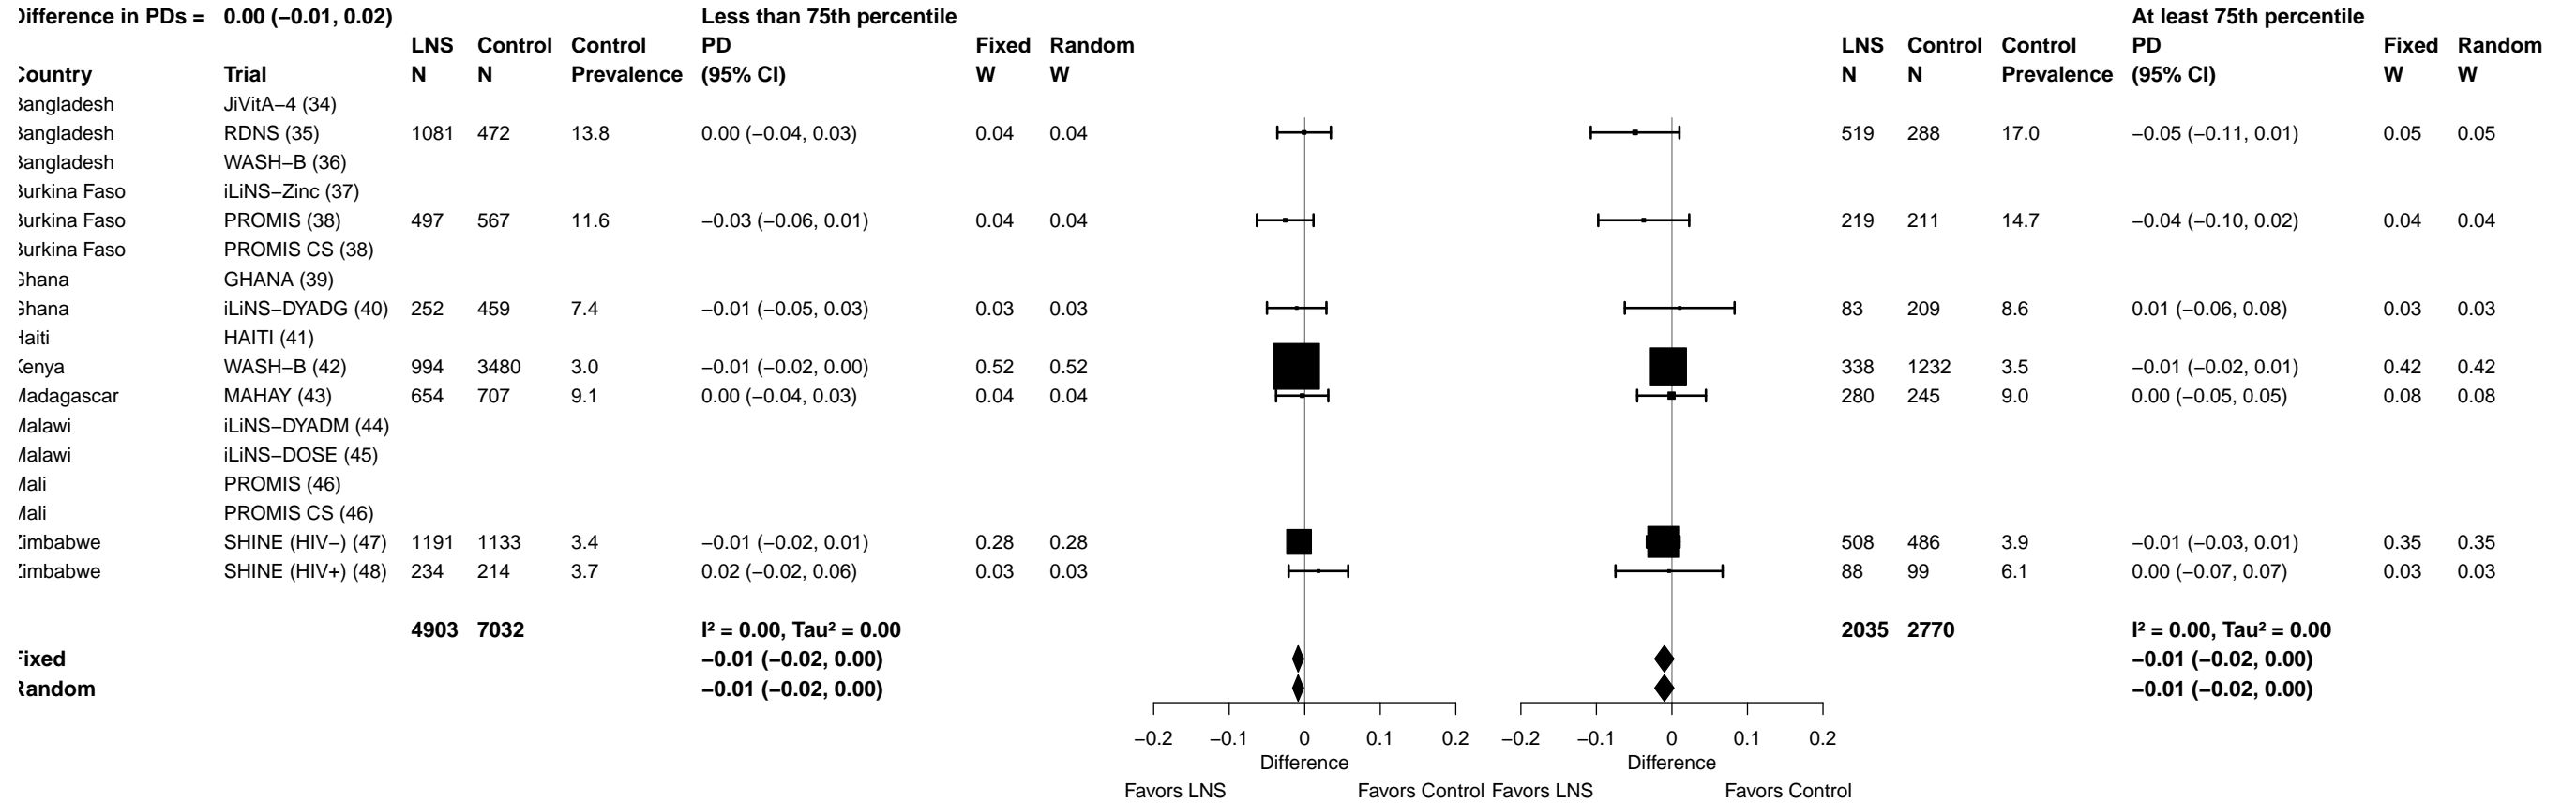



Supplemental figure 6K: Acute malnutrition prevalence difference

6K6: Stratified by Child sex

P-for-interaction = 0.708

Difference in PDs = 0.00 (-0.01, 0.01)

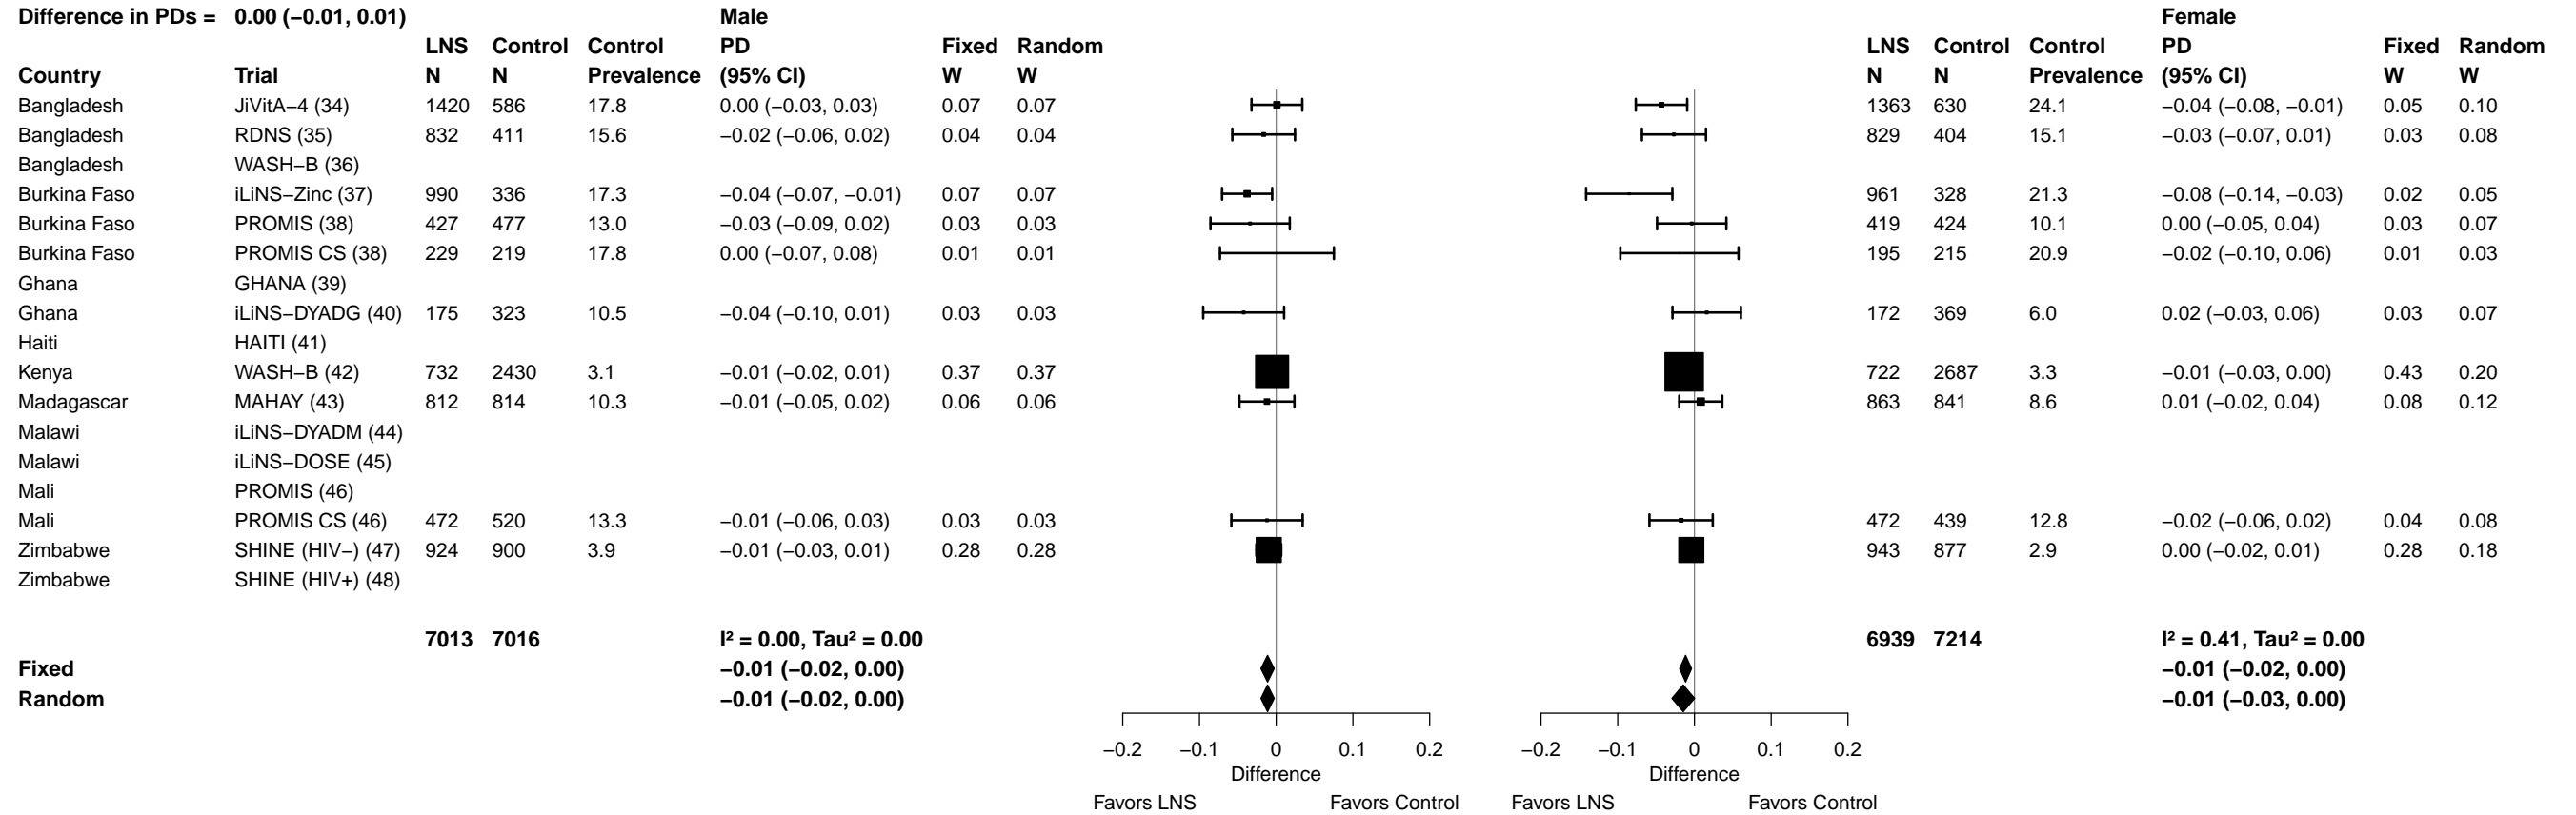

Supplemental figure 6K: Acute malnutrition prevalence difference

6K7: Stratified by Child birth order

P-for-interaction = 0.221

Difference in PDs = 0.01 (-0.01, 0.02)

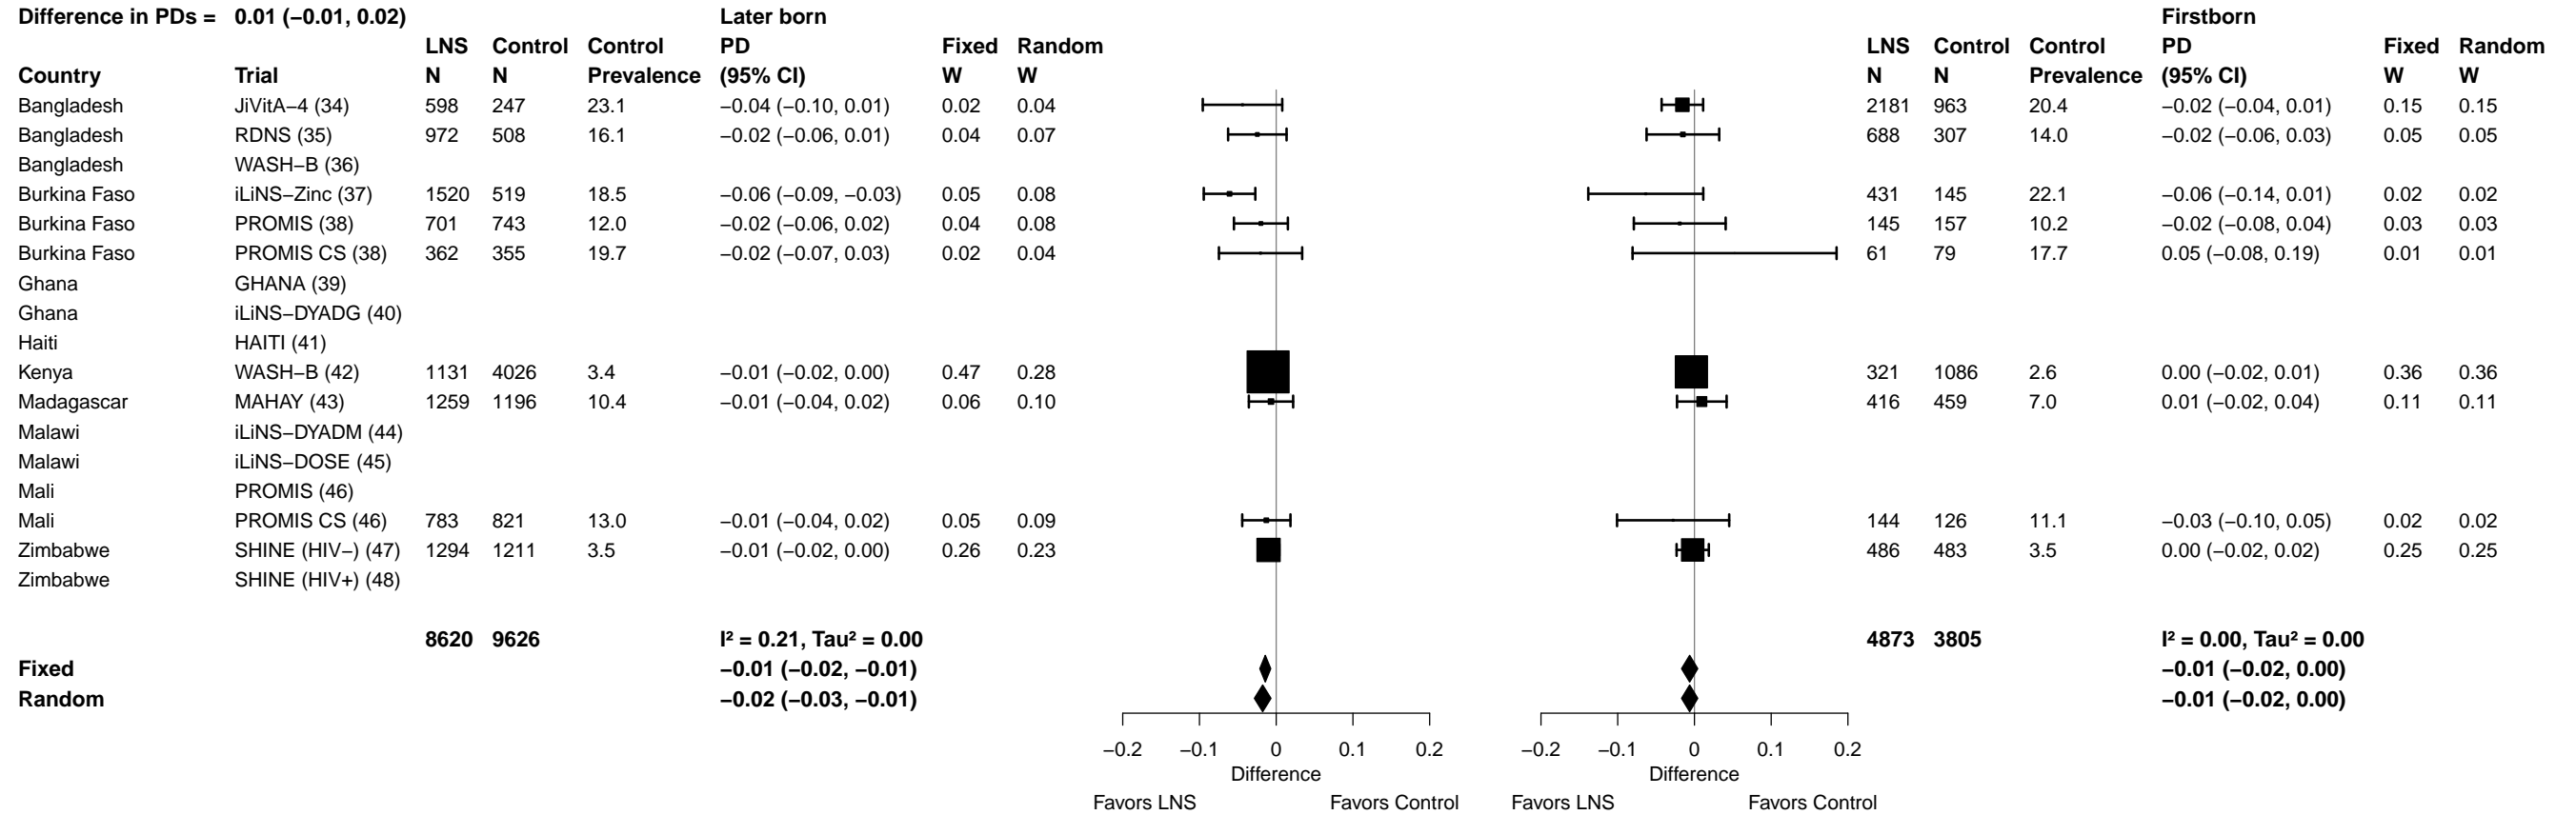

Supplemental figure 6K: Acute malnutrition prevalence difference

6K8: Stratified by Child baseline anthropometric status

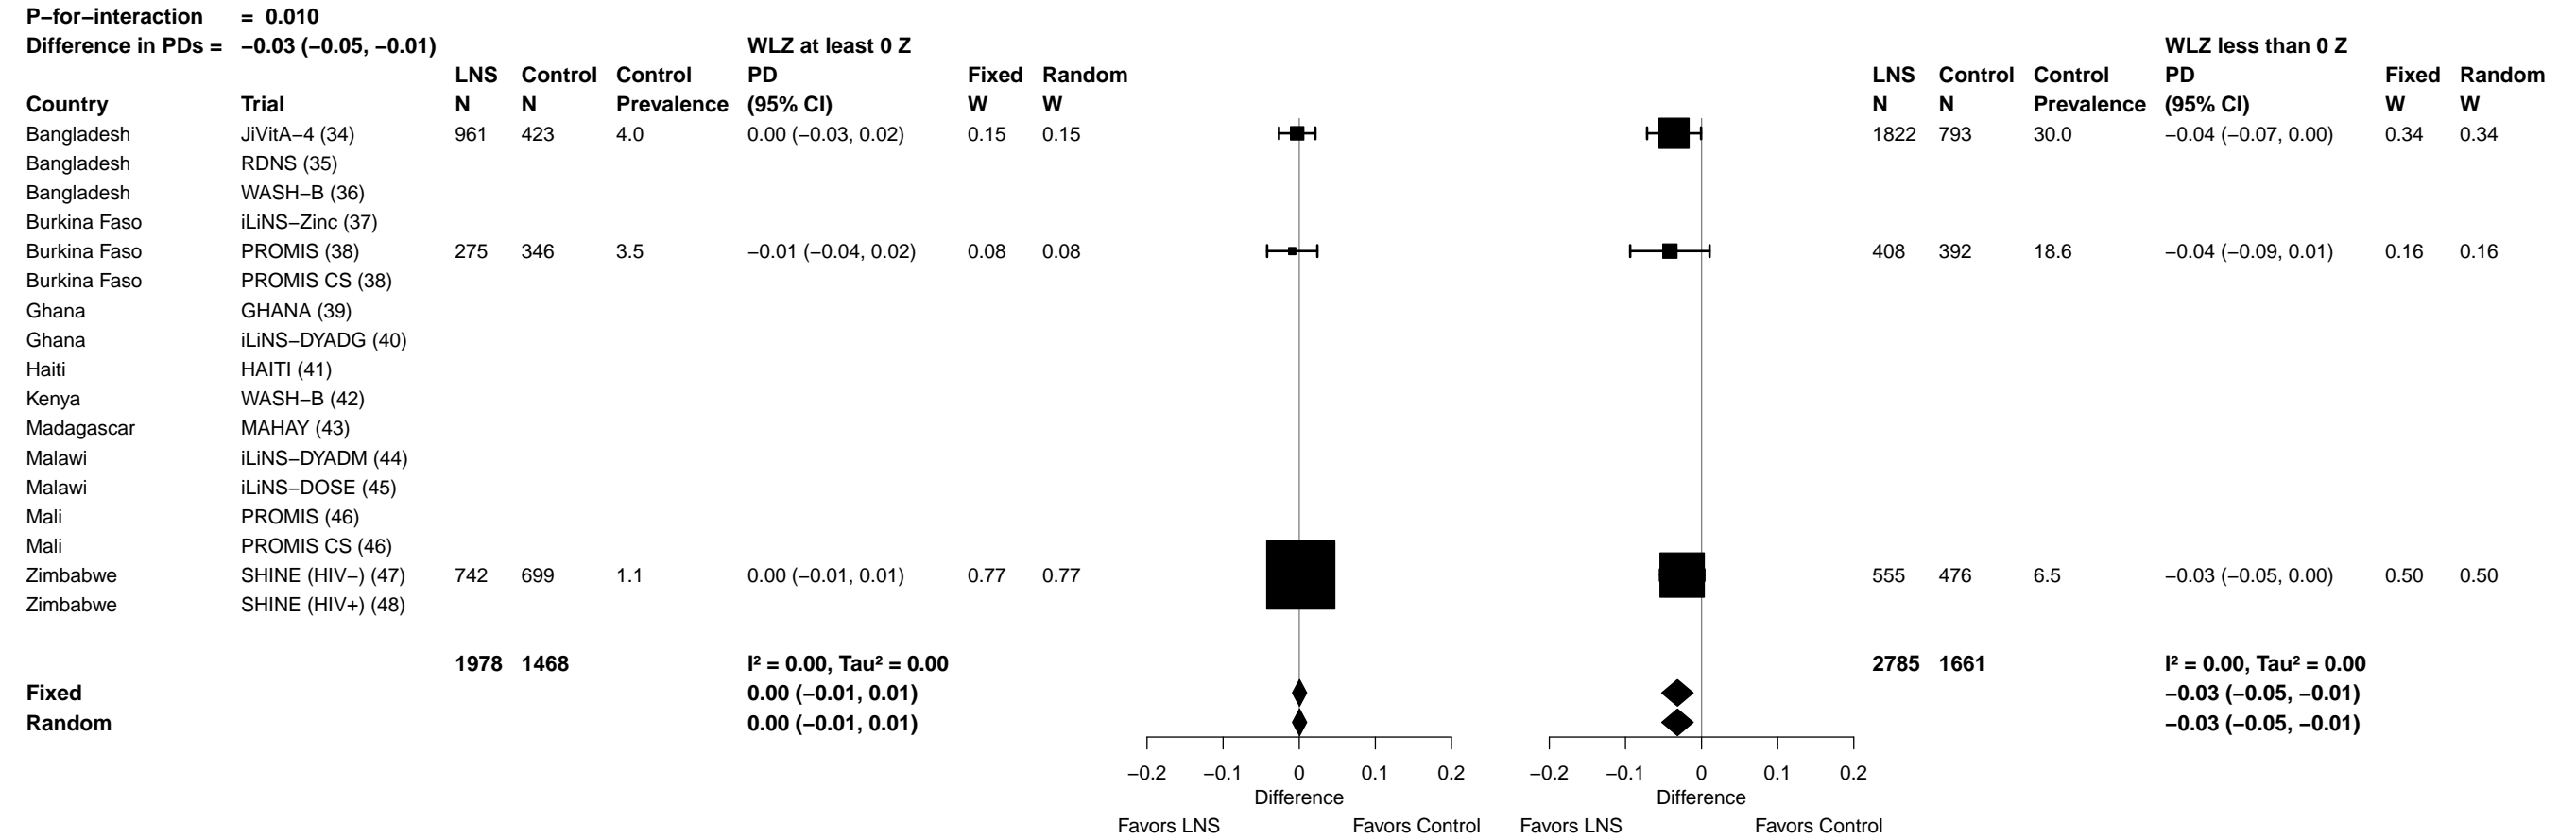

### Supplemental figure 6L: Mean difference in WAZ

#### 6L1: Stratified by Maternal height

P-for-interaction = 0.234

Difference in MDs = -0.04 (-0.11, 0.03)

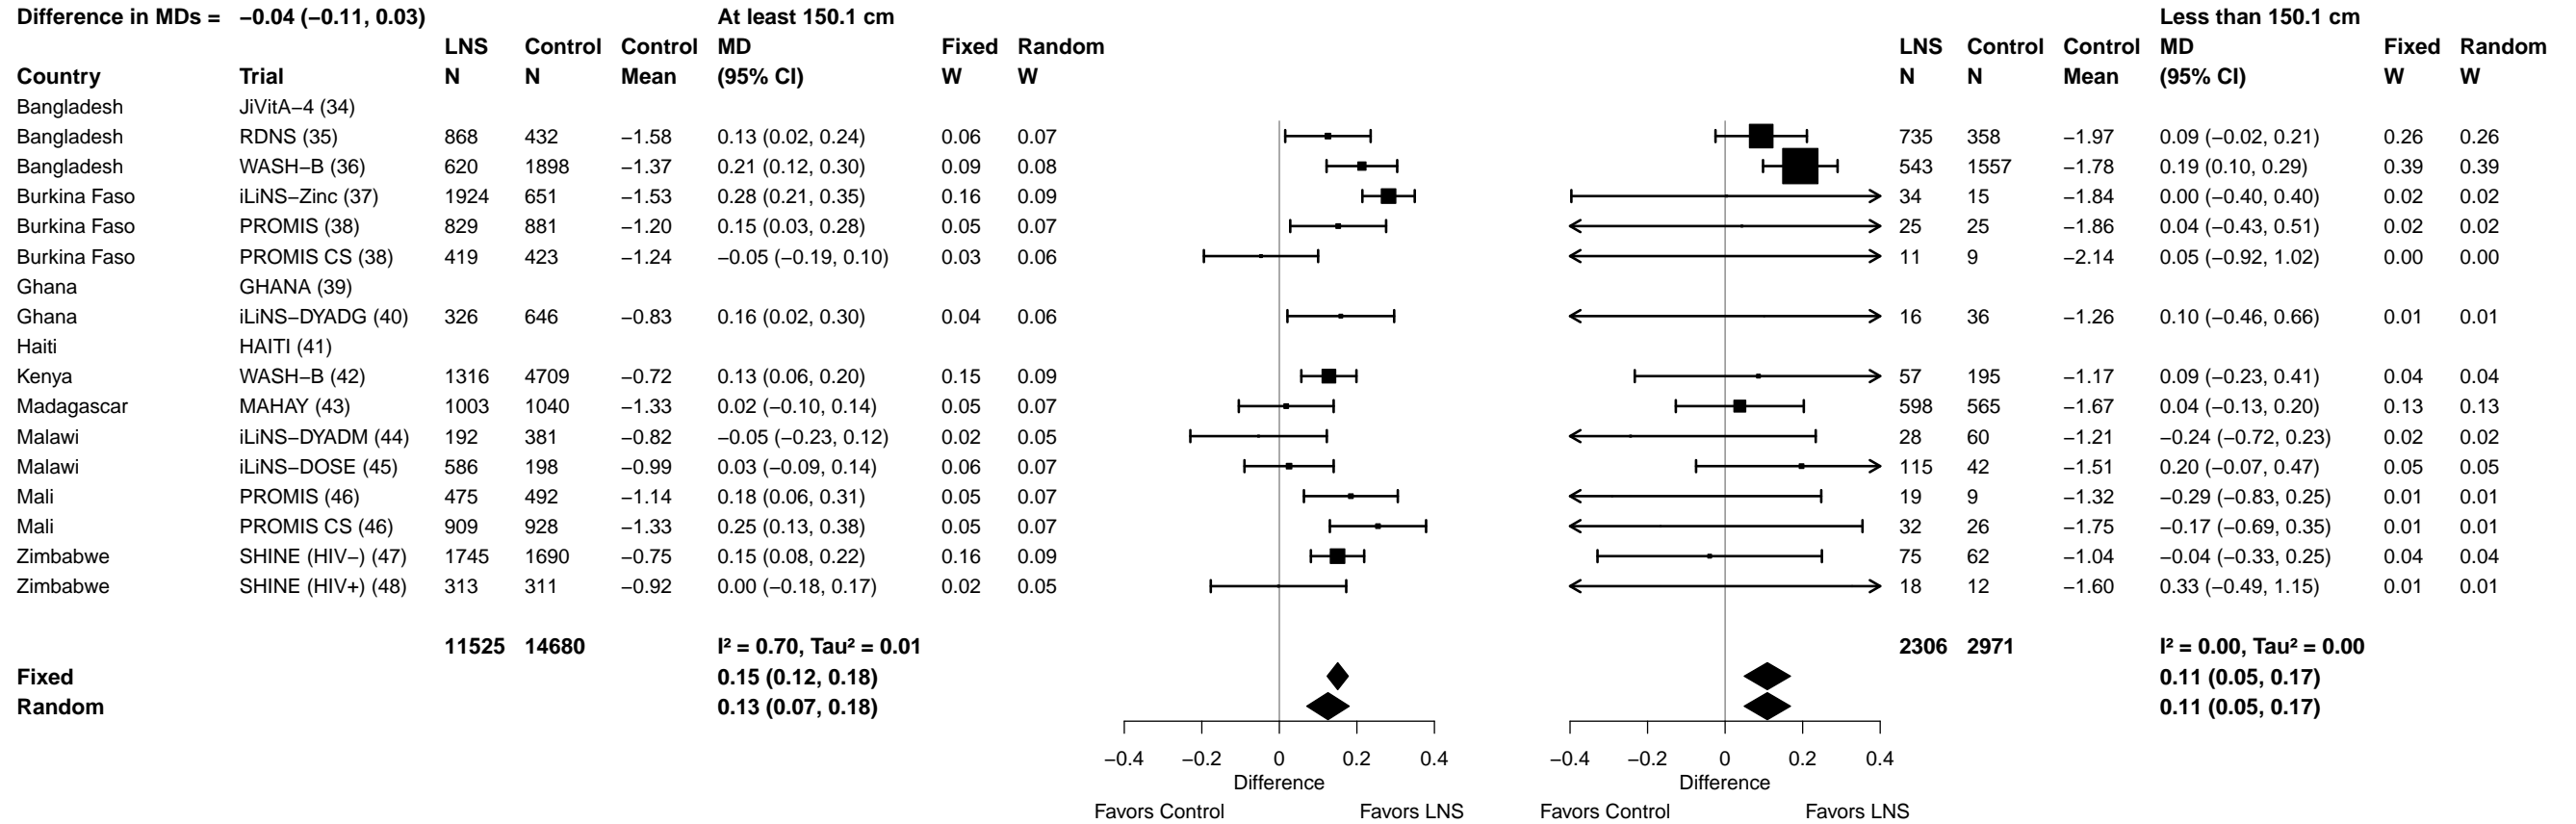



Supplemental figure 6L: Mean difference in WAZ

6L3: Stratified by Maternal age

P-for-interaction = 0.880

Difference in MDs = 0.00 (-0.04, 0.04)

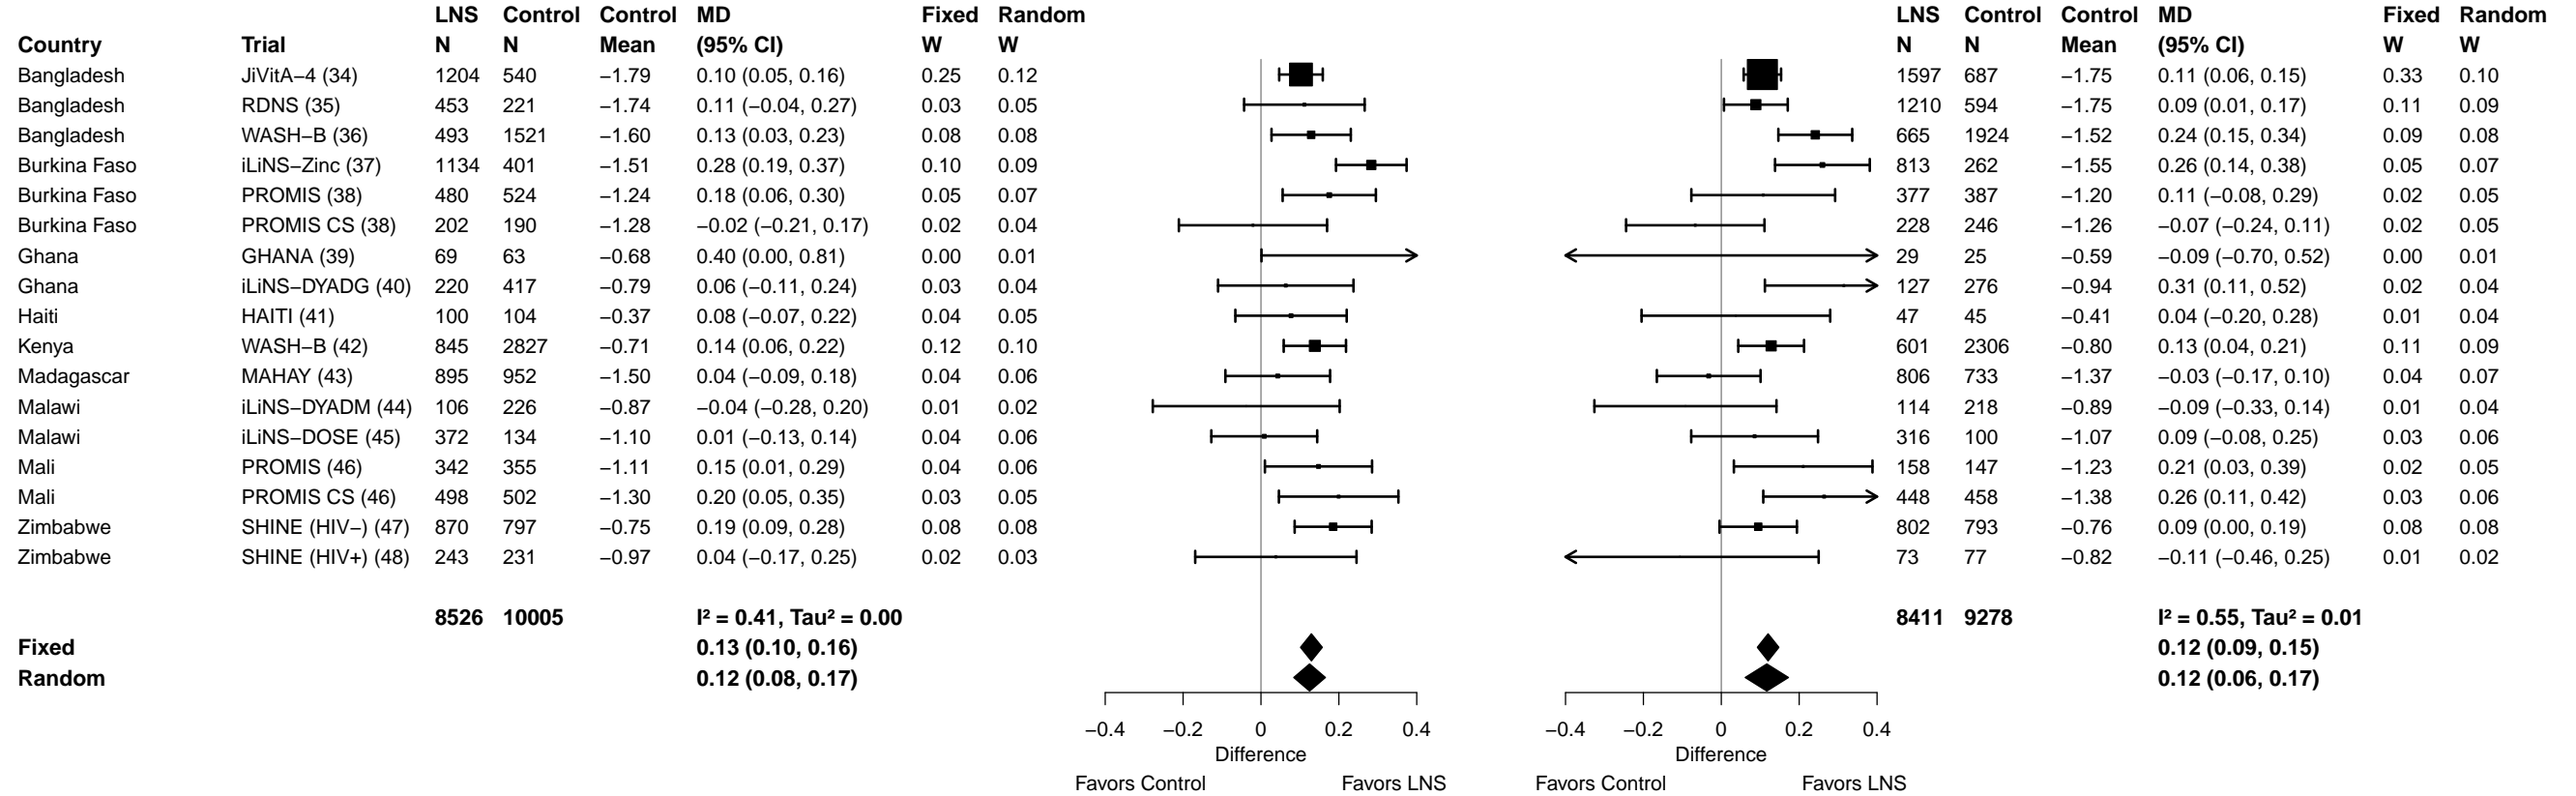

Supplemental figure 6L: Mean difference in WAZ

6L4: Stratified by Maternal education

P-for-interaction = 0.600

Difference in MDs = 0.01 (-0.03, 0.06)

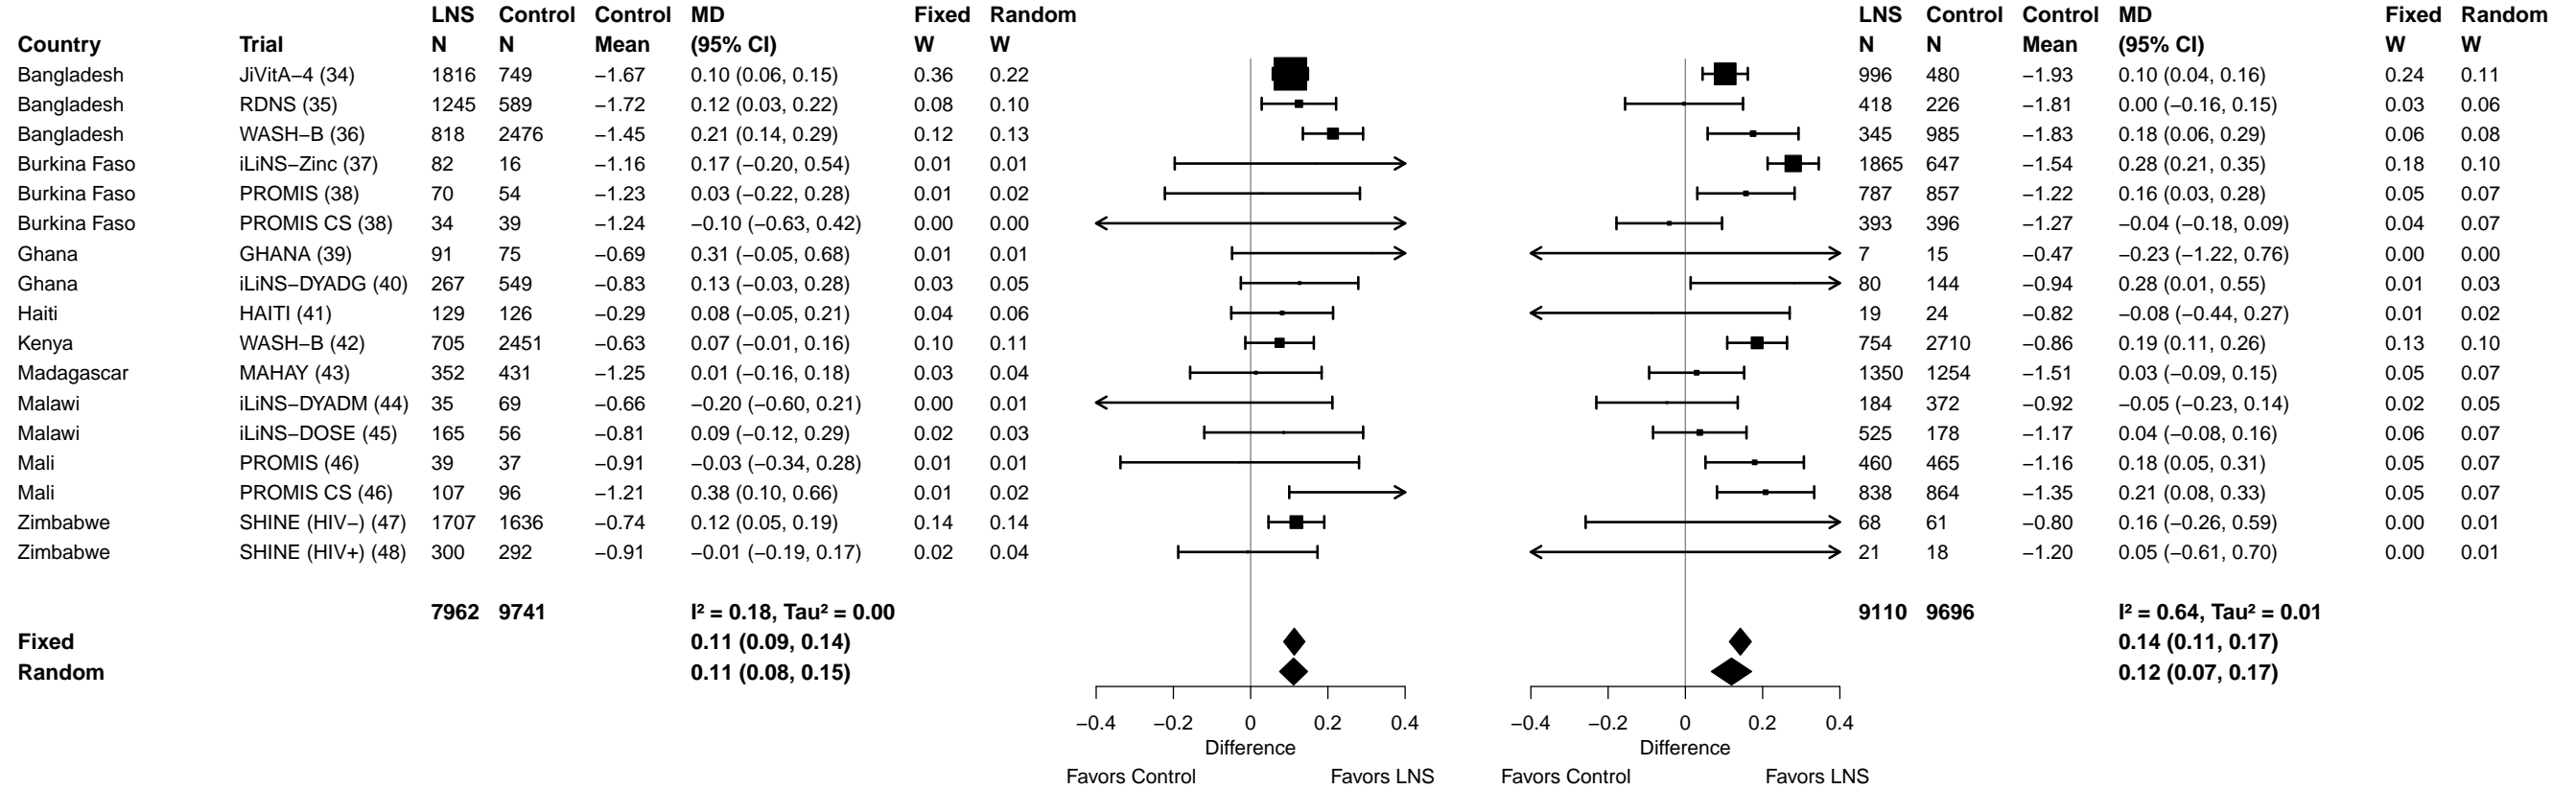

Supplemental figure 6L: Mean difference in WAZ

6L5: Stratified by Maternal depressive symptoms

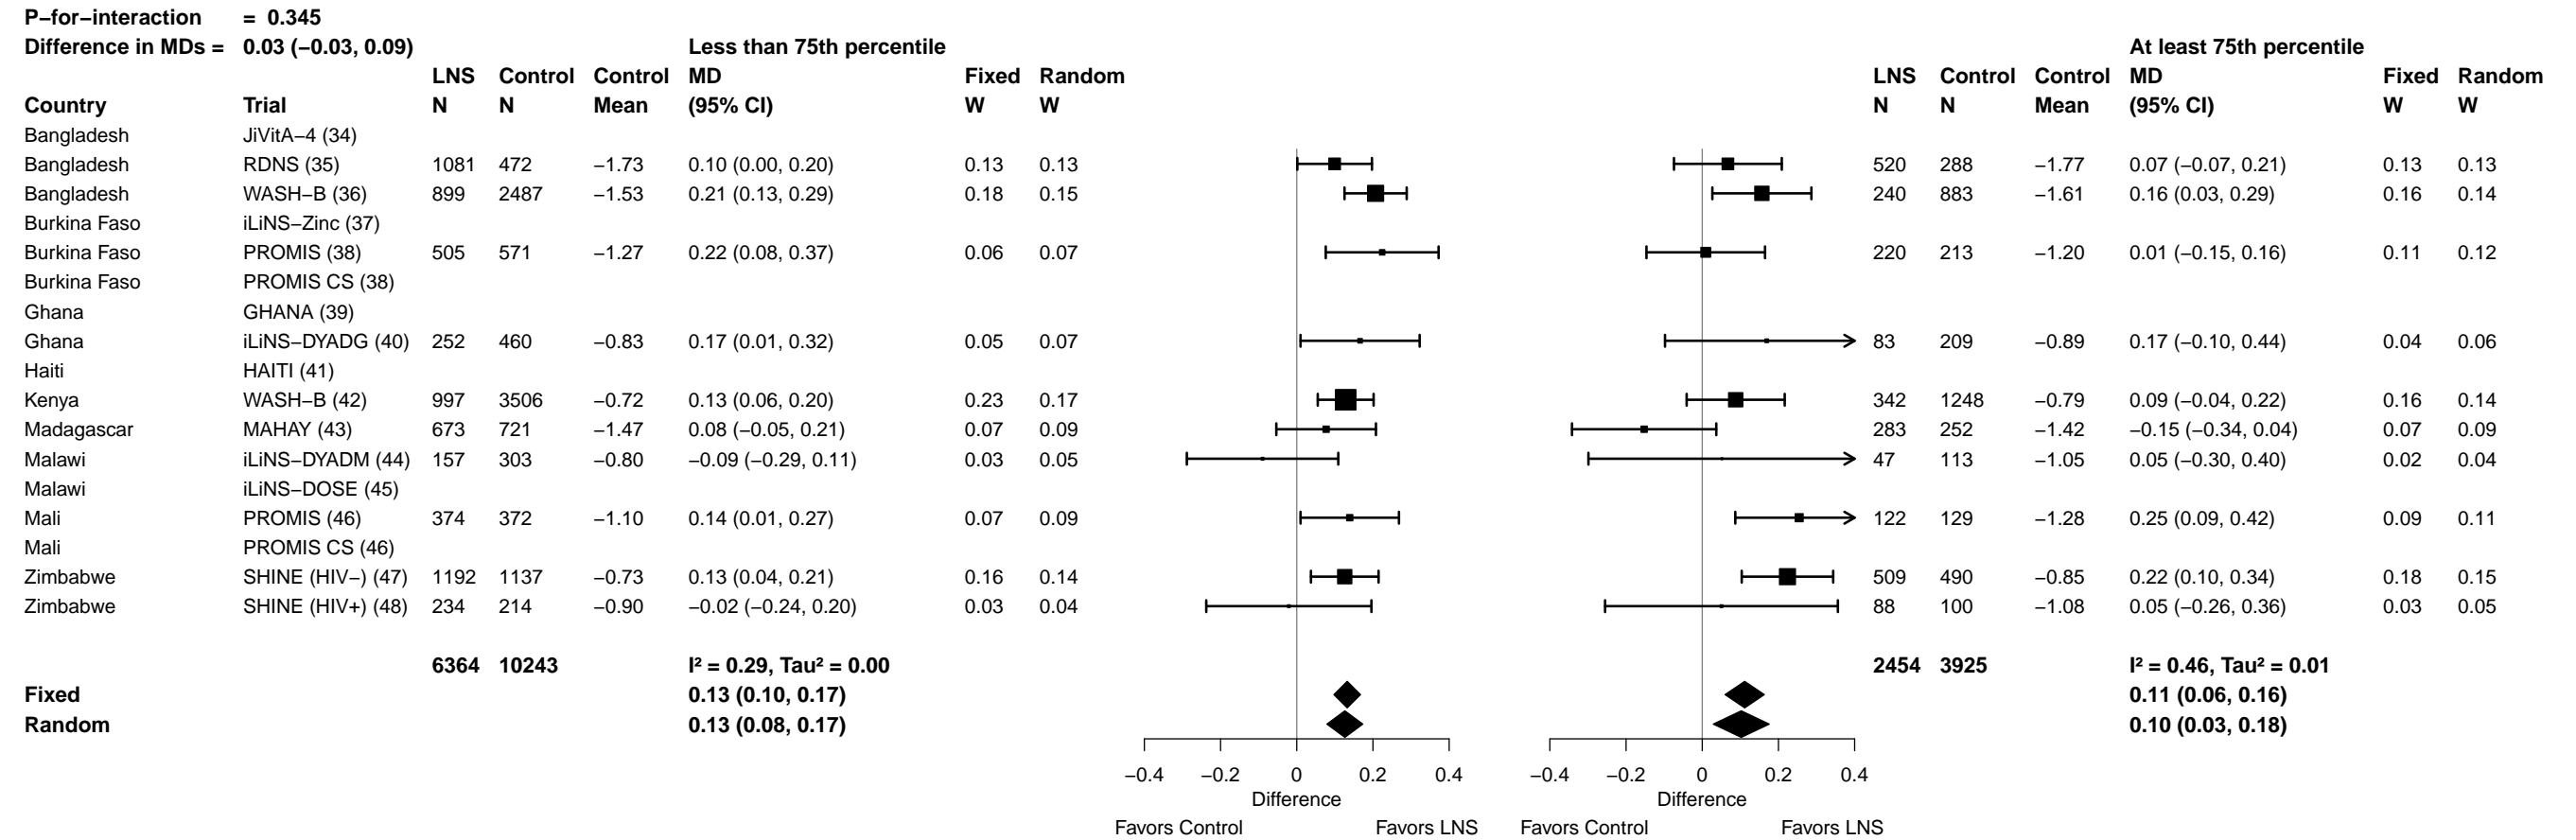



Supplemental figure 6L: Mean difference in WAZ

6L6: Stratified by Child sex

P-for-interaction = 0.292

Difference in MDs = 0.02 (-0.02, 0.06)

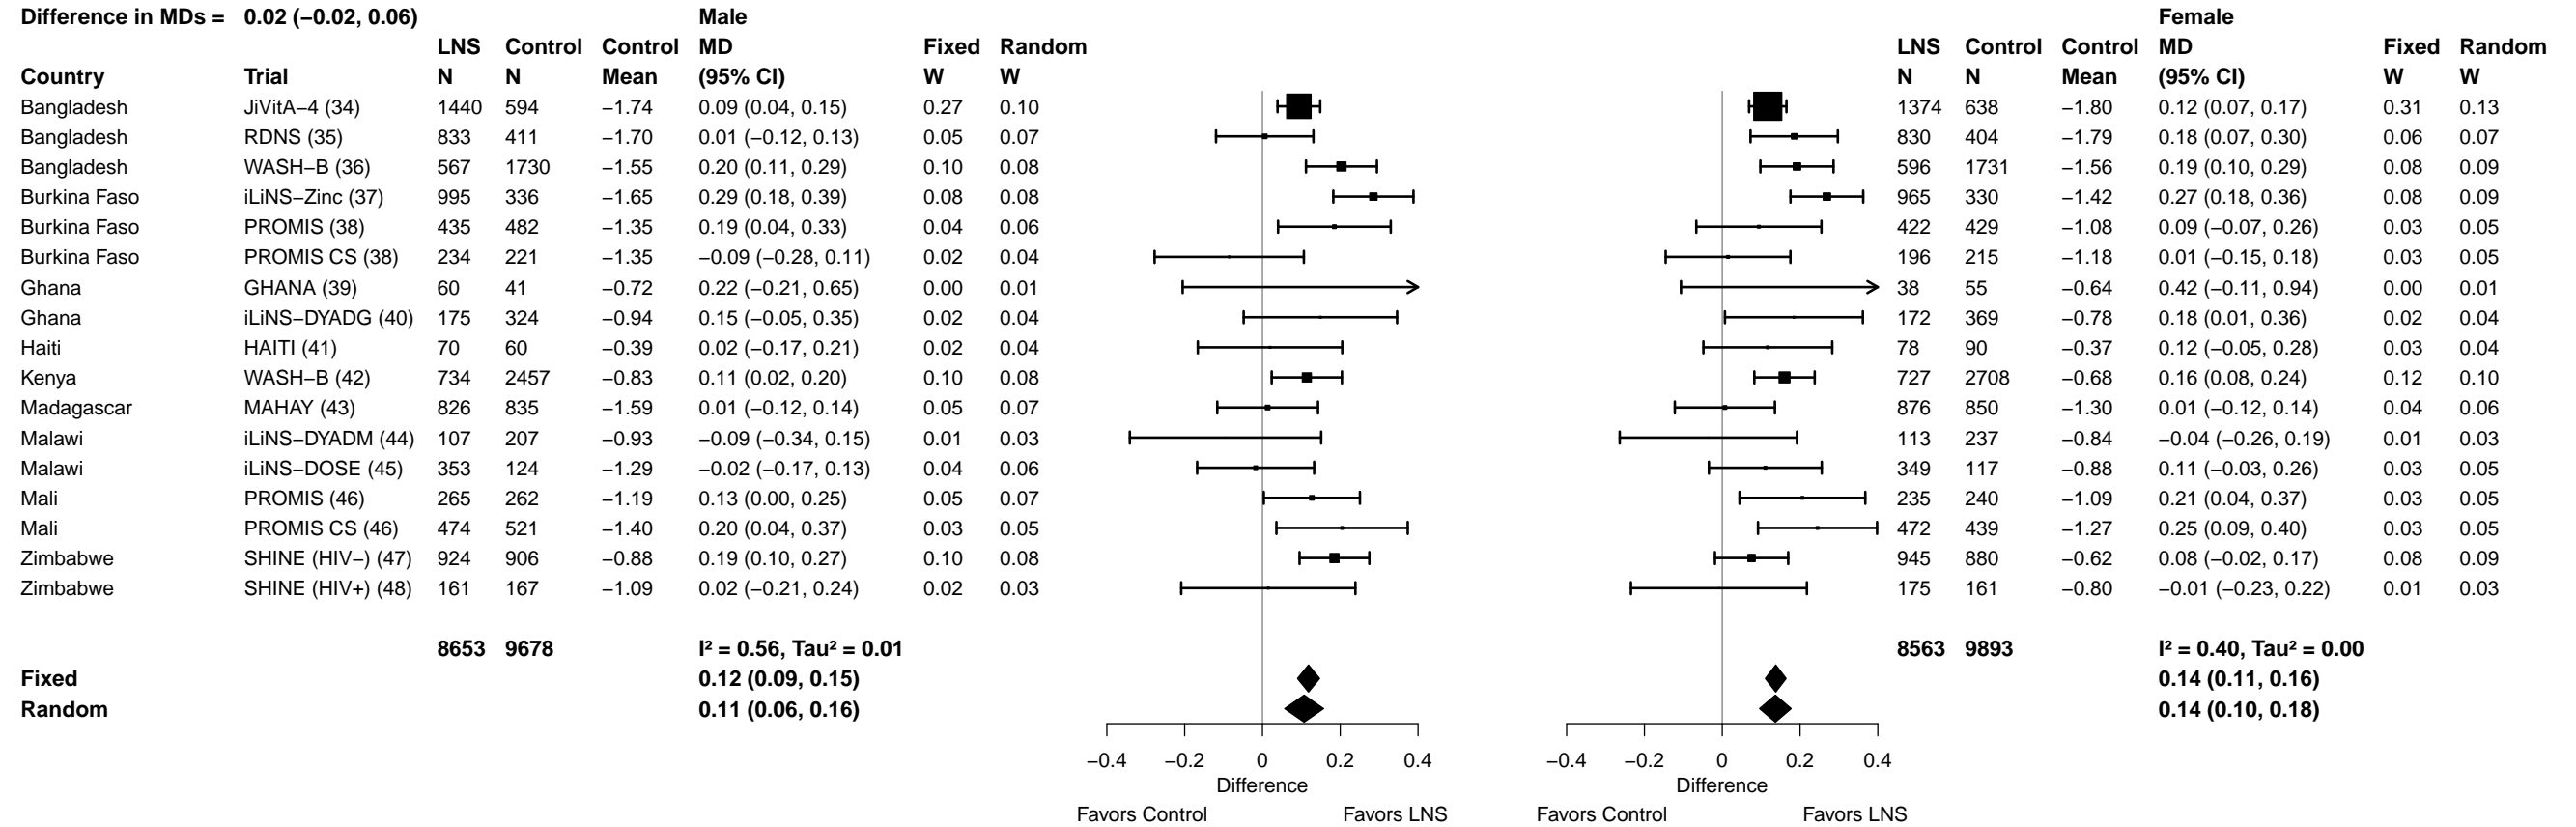

Supplemental figure 6L: Mean difference in WAZ

6L7: Stratified by Child birth order

P-for-interaction = 0.021

Difference in MDs = -0.05 (-0.09, -0.01)

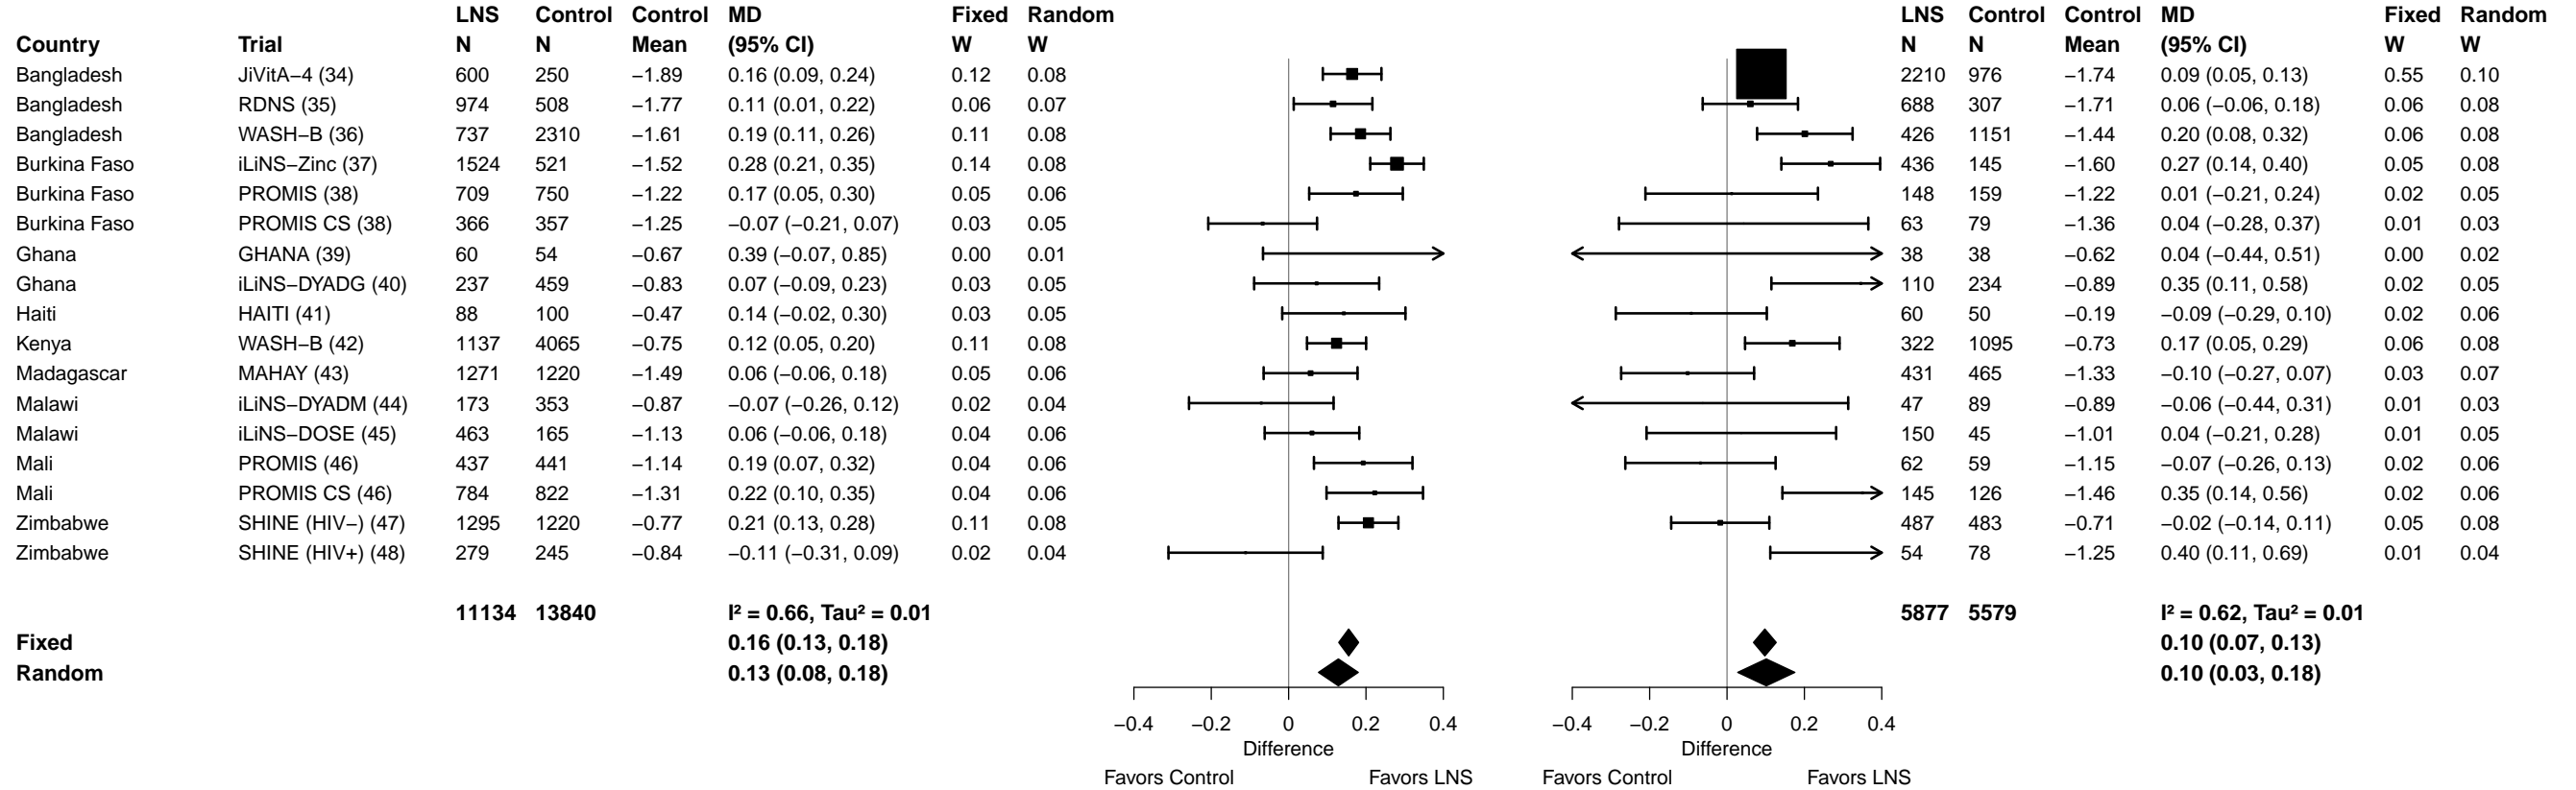

Supplemental figure 6L: Mean difference in WAZ

6L8: Stratified by Child baseline anthropometric status

P-for-interaction = 0.078

Difference in MDs = 0.05 (-0.01, 0.10)

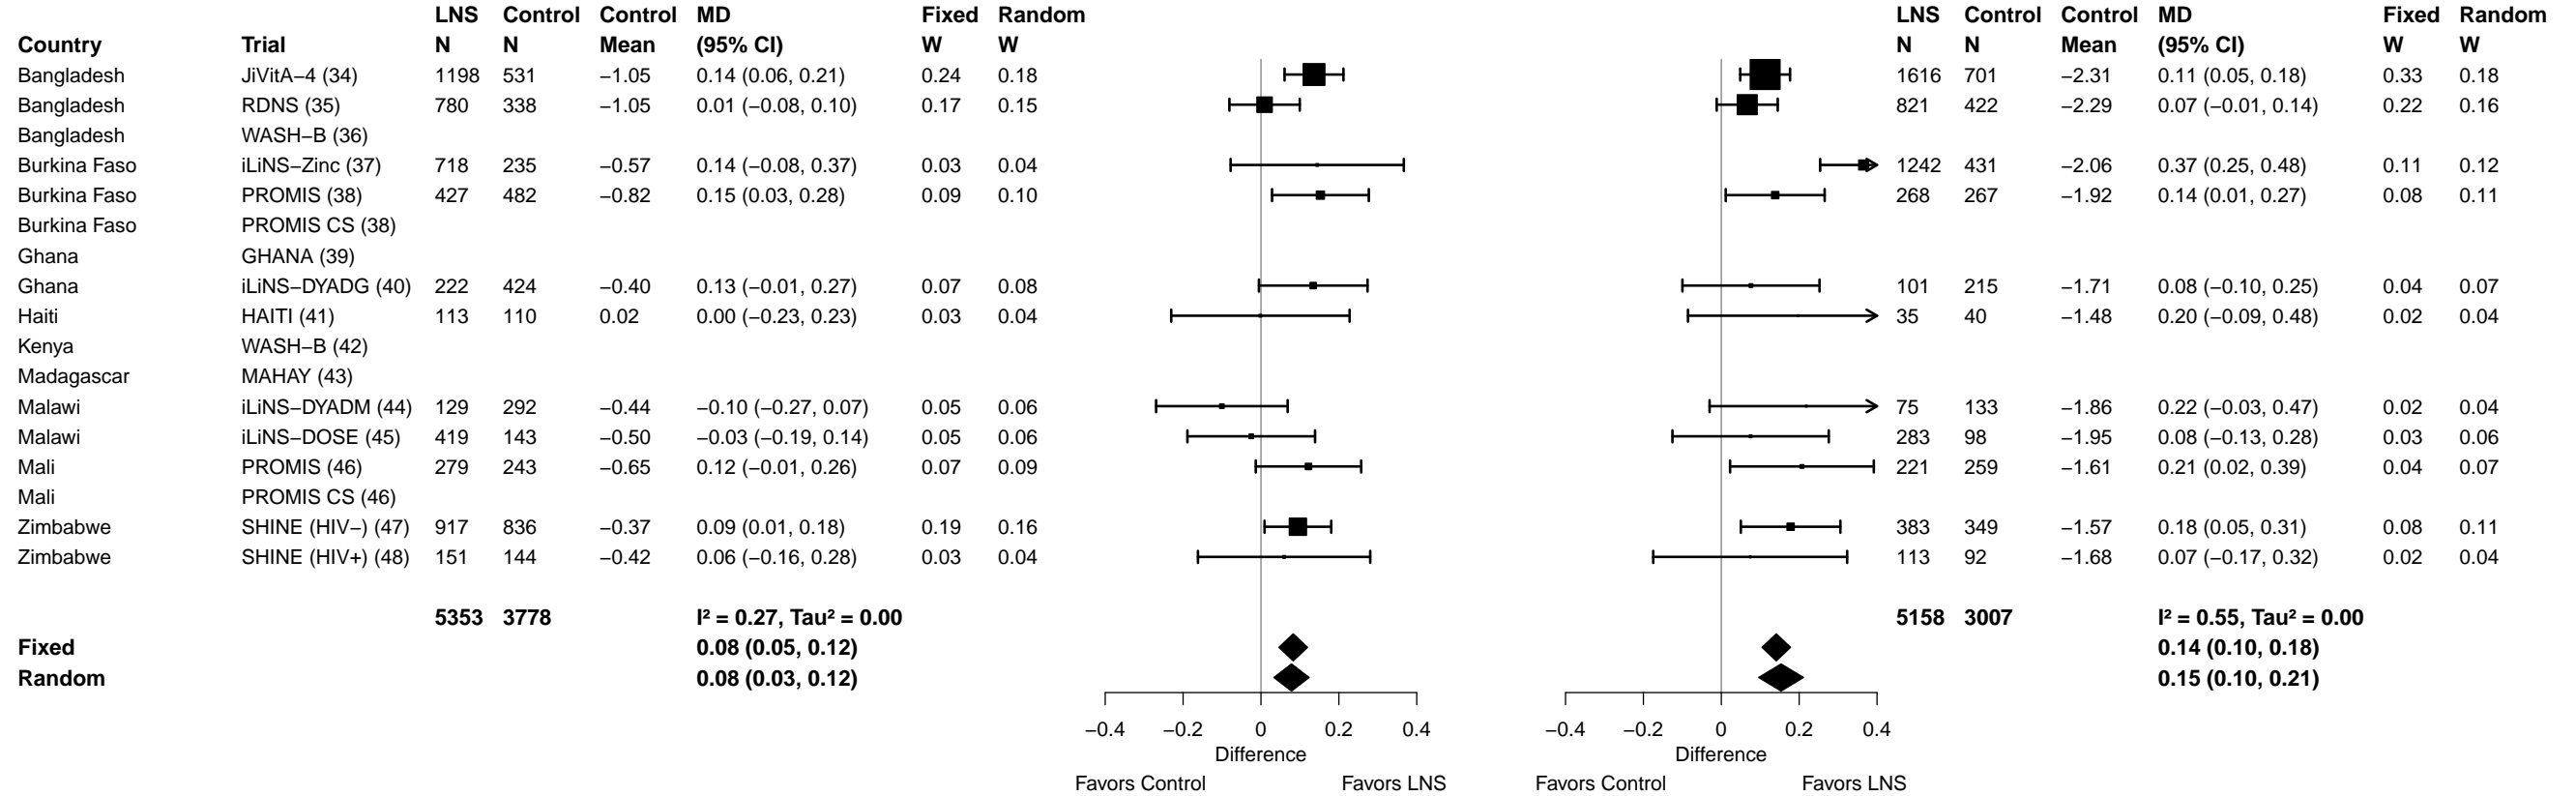

### Supplemental figure 6M: Underweight prevalence ratio

#### 6M1: Stratified by Maternal height

**P-for-interaction = 0.546**  
**Ratio of PRs = 1.04 (0.92, 1.16)**

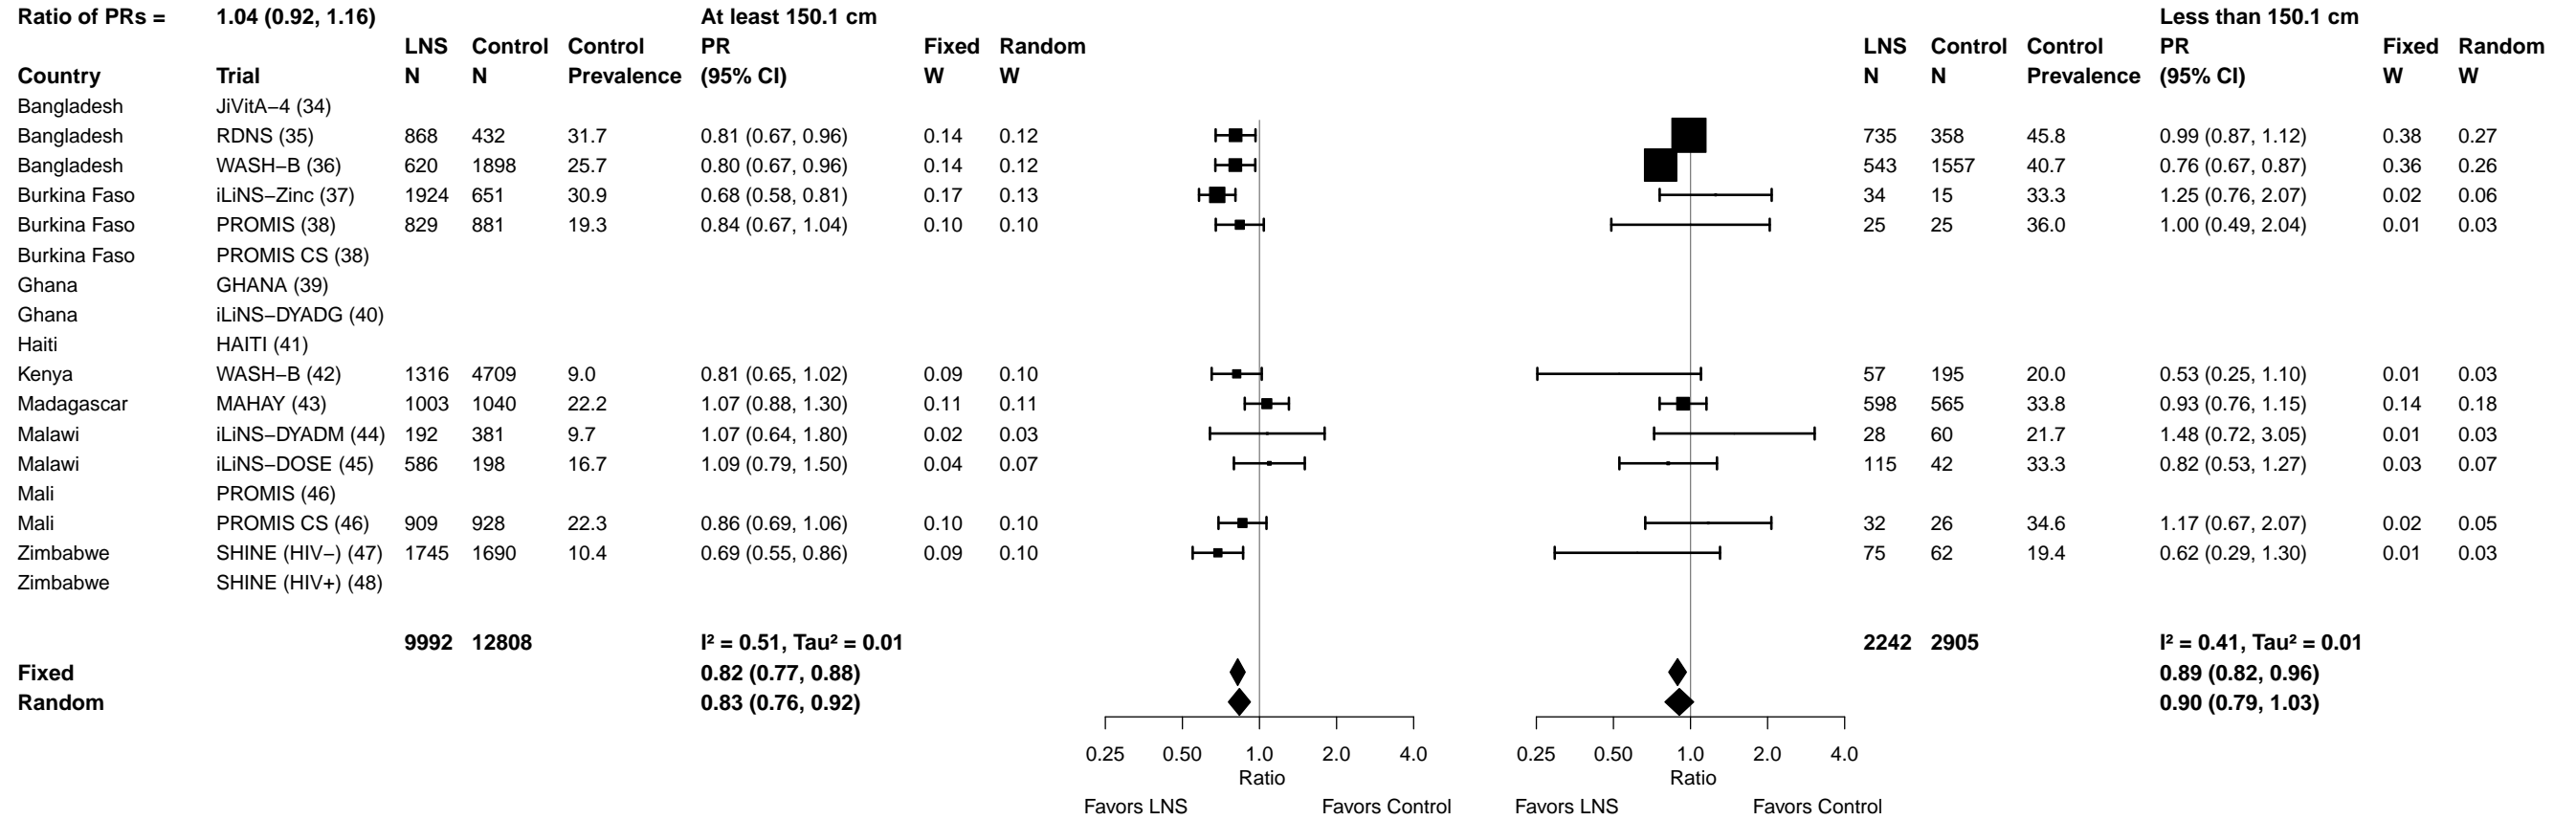



Supplemental figure 6M: Underweight prevalence ratio

6M3: Stratified by Maternal age

P-for-interaction = 0.245

Ratio of PRs = 1.05 (0.97, 1.15)

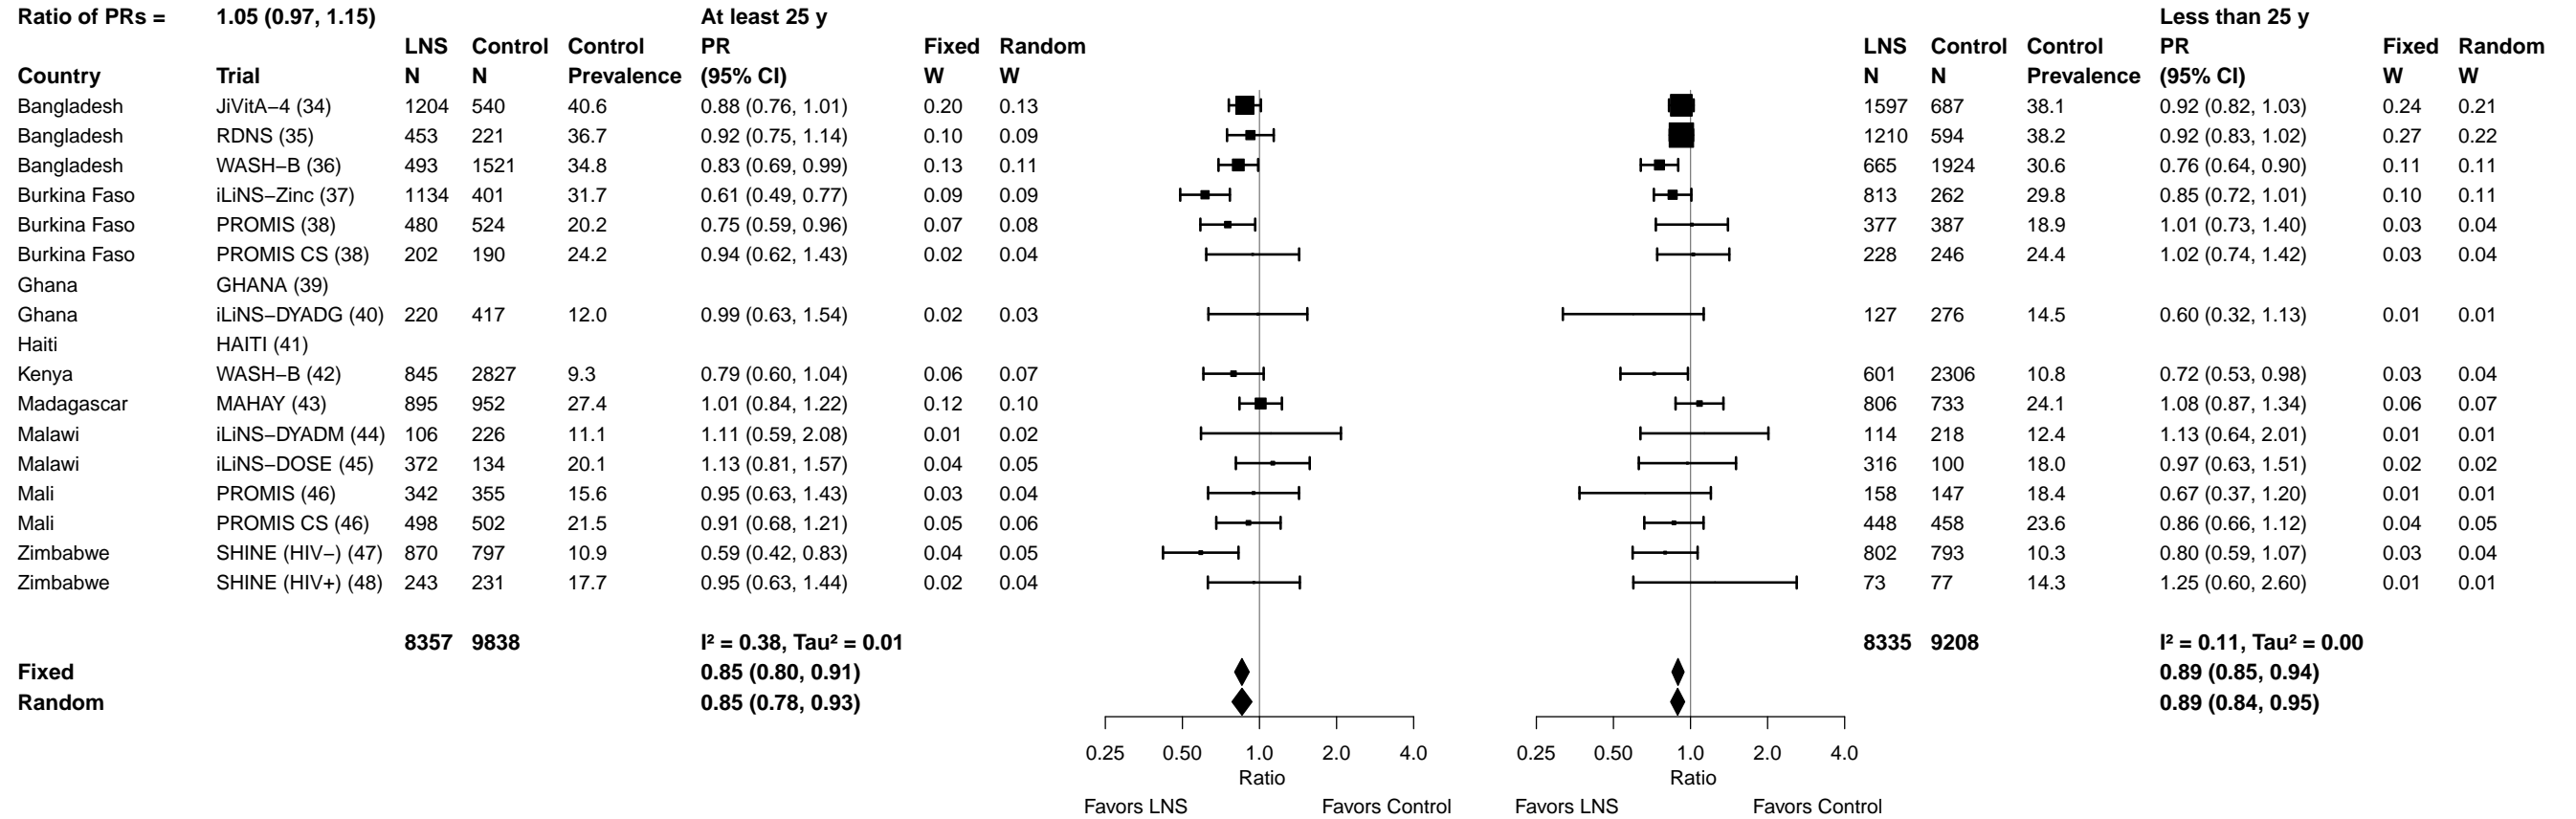

Supplemental figure 6M: Underweight prevalence ratio

6M4: Stratified by Maternal education

P-for-interaction = 0.399

Ratio of PRs = 1.05 (0.94, 1.17)

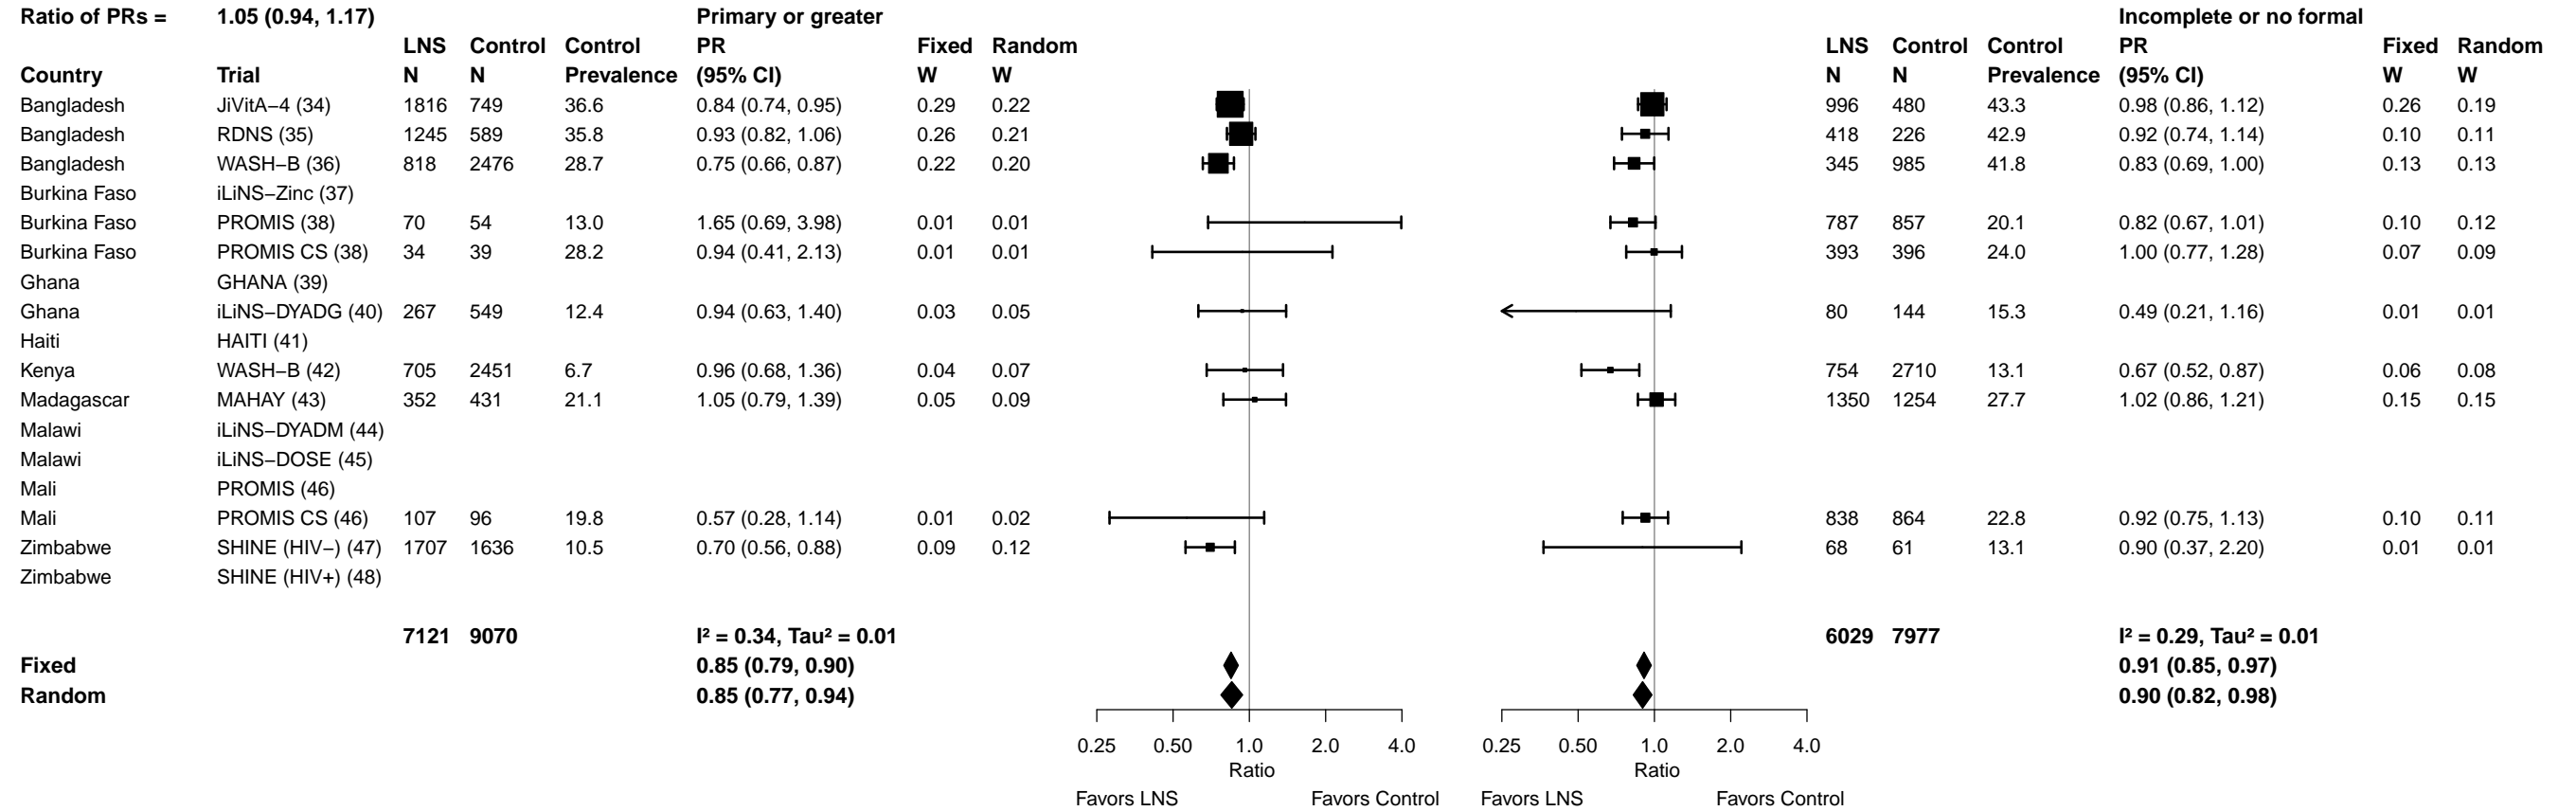

Supplemental figure 6M: Underweight prevalence ratio

6M5: Stratified by Maternal depressive symptoms

P-for-interaction = 0.490

Ratio of PRs = 0.96 (0.84, 1.09)

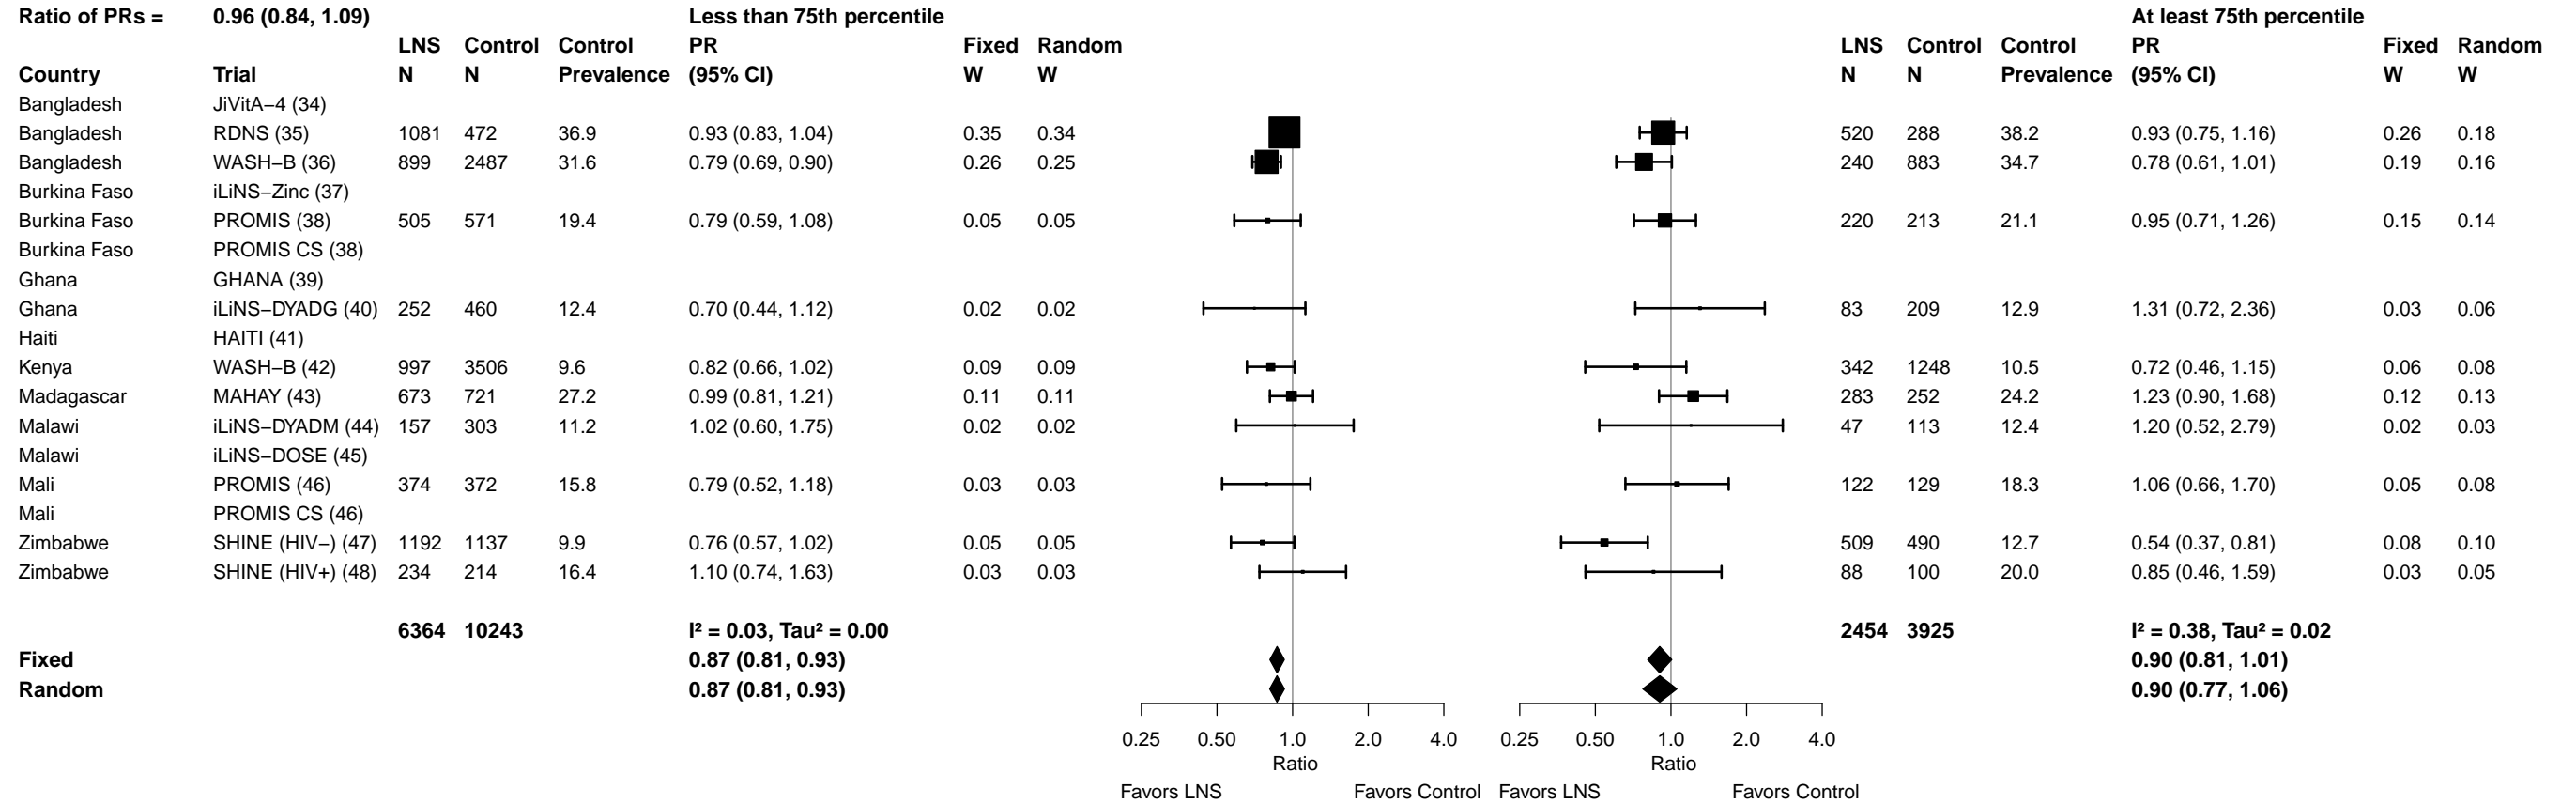





Supplemental figure 6M: Underweight prevalence ratio

6M7: Stratified by Child birth order

P-for-interaction = 0.001

Ratio of PRs = 1.16 (1.06, 1.27)

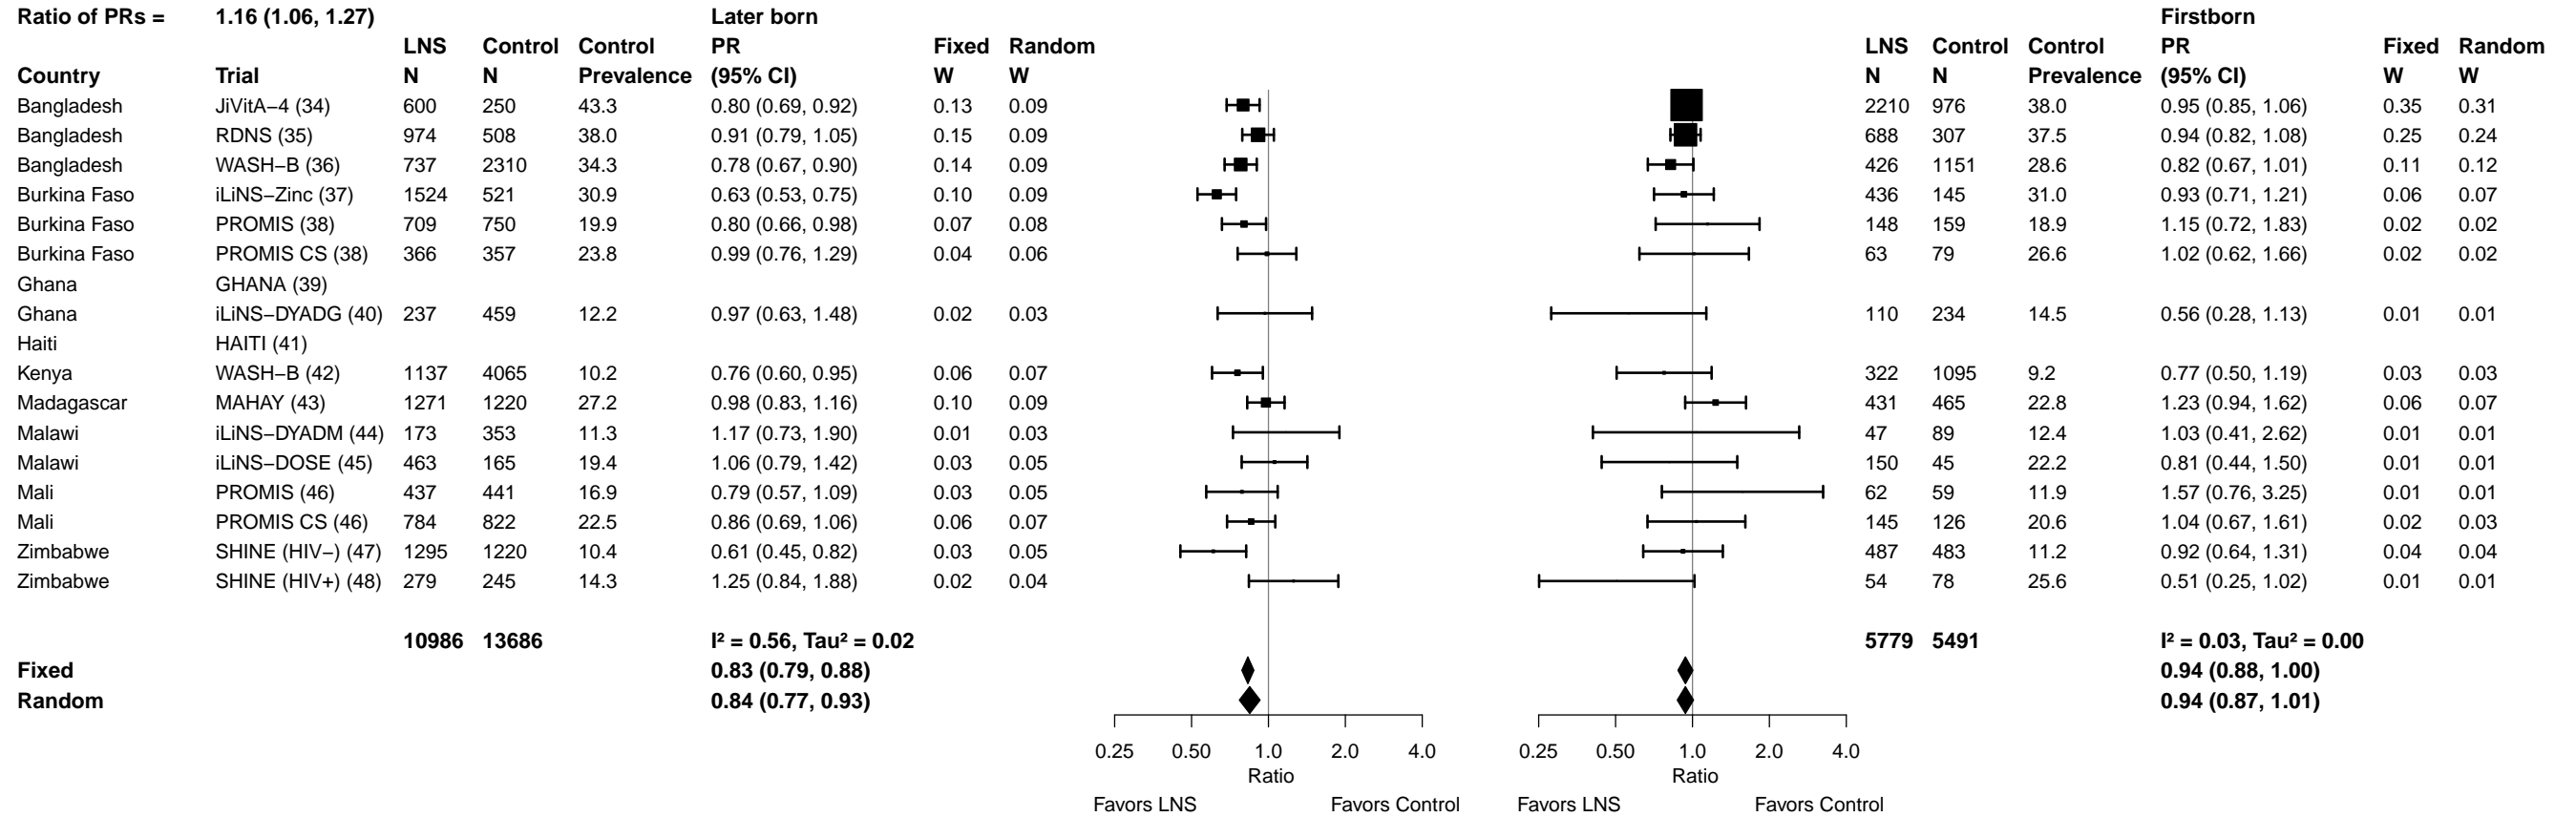



### Supplemental figure 6N: Underweight prevalence difference

#### 6N1: Stratified by Maternal height

P-for-interaction = 0.211

Difference in PDs = -0.02 (-0.05, 0.01)

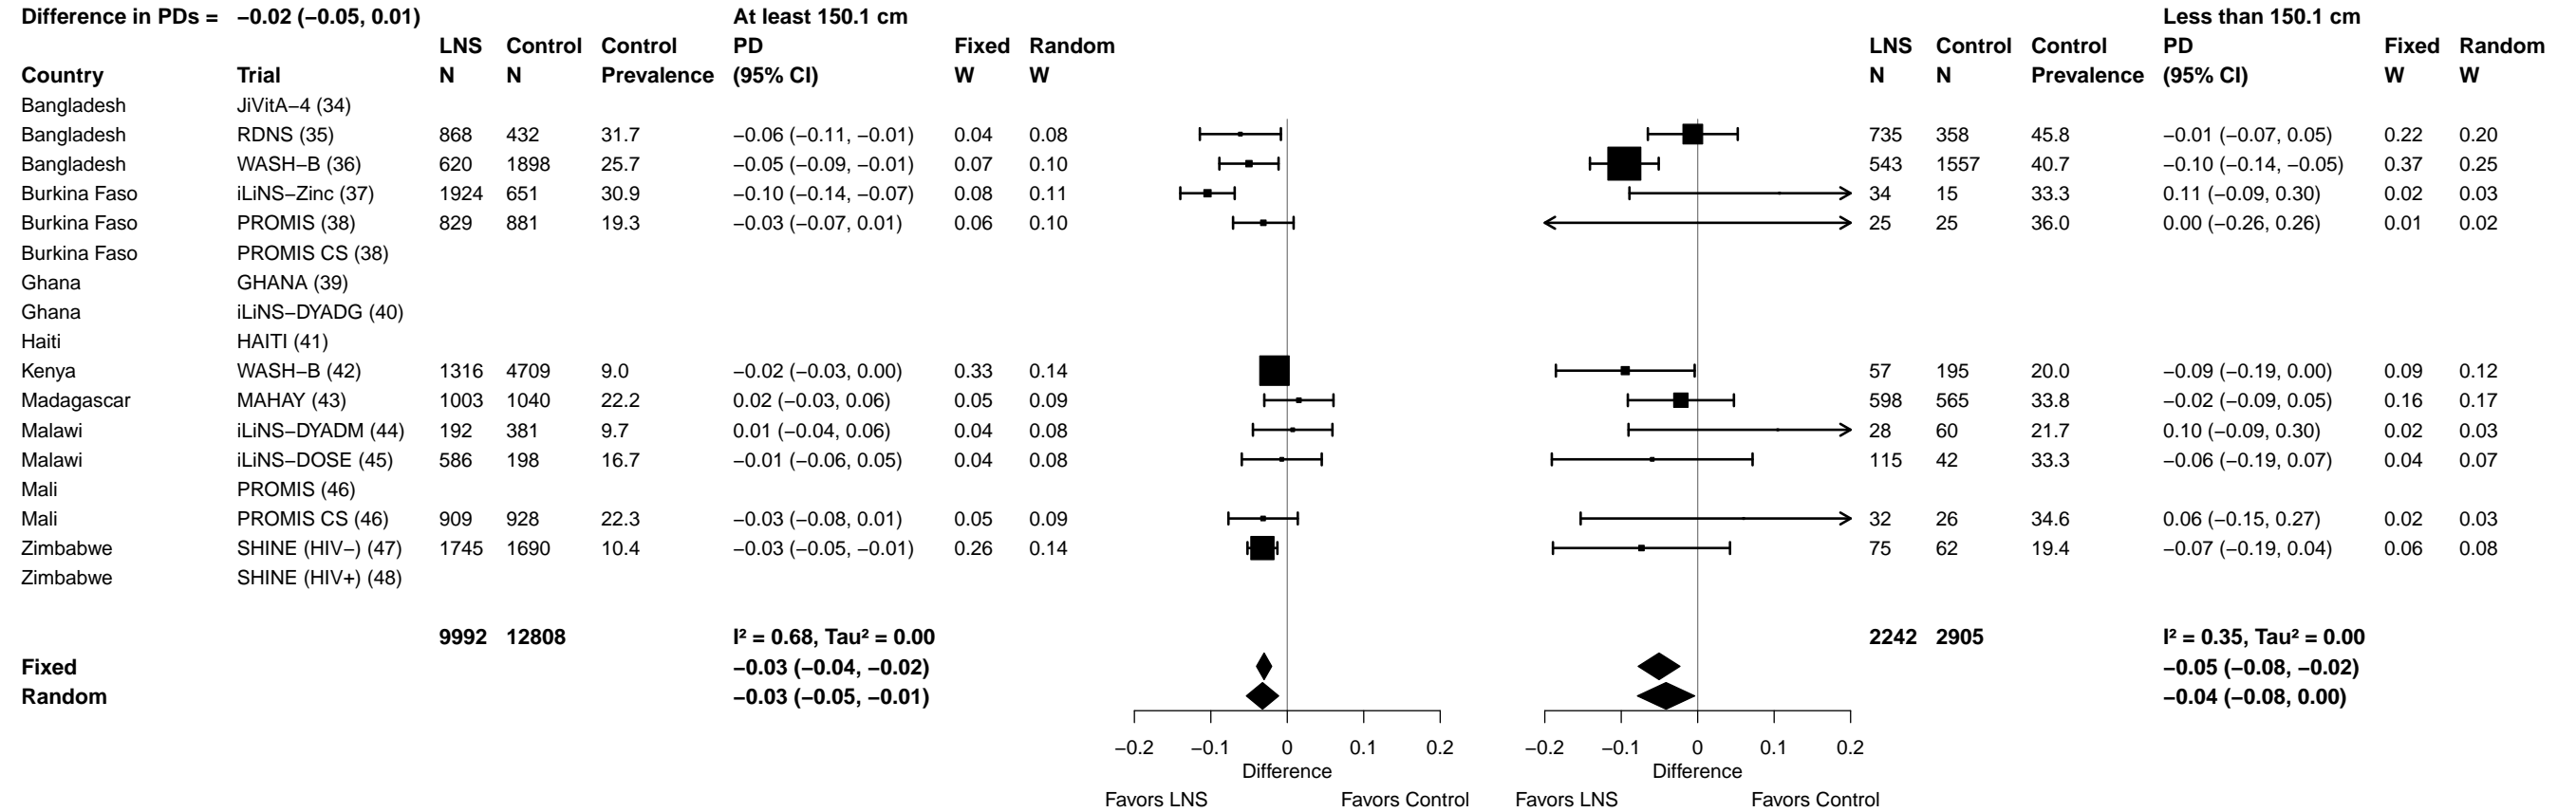

Supplemental figure 6N: Underweight prevalence difference

6N2: Stratified by Maternal BMI

P-for-interaction = 0.263

Difference in PDs = -0.01 (-0.03, 0.01)

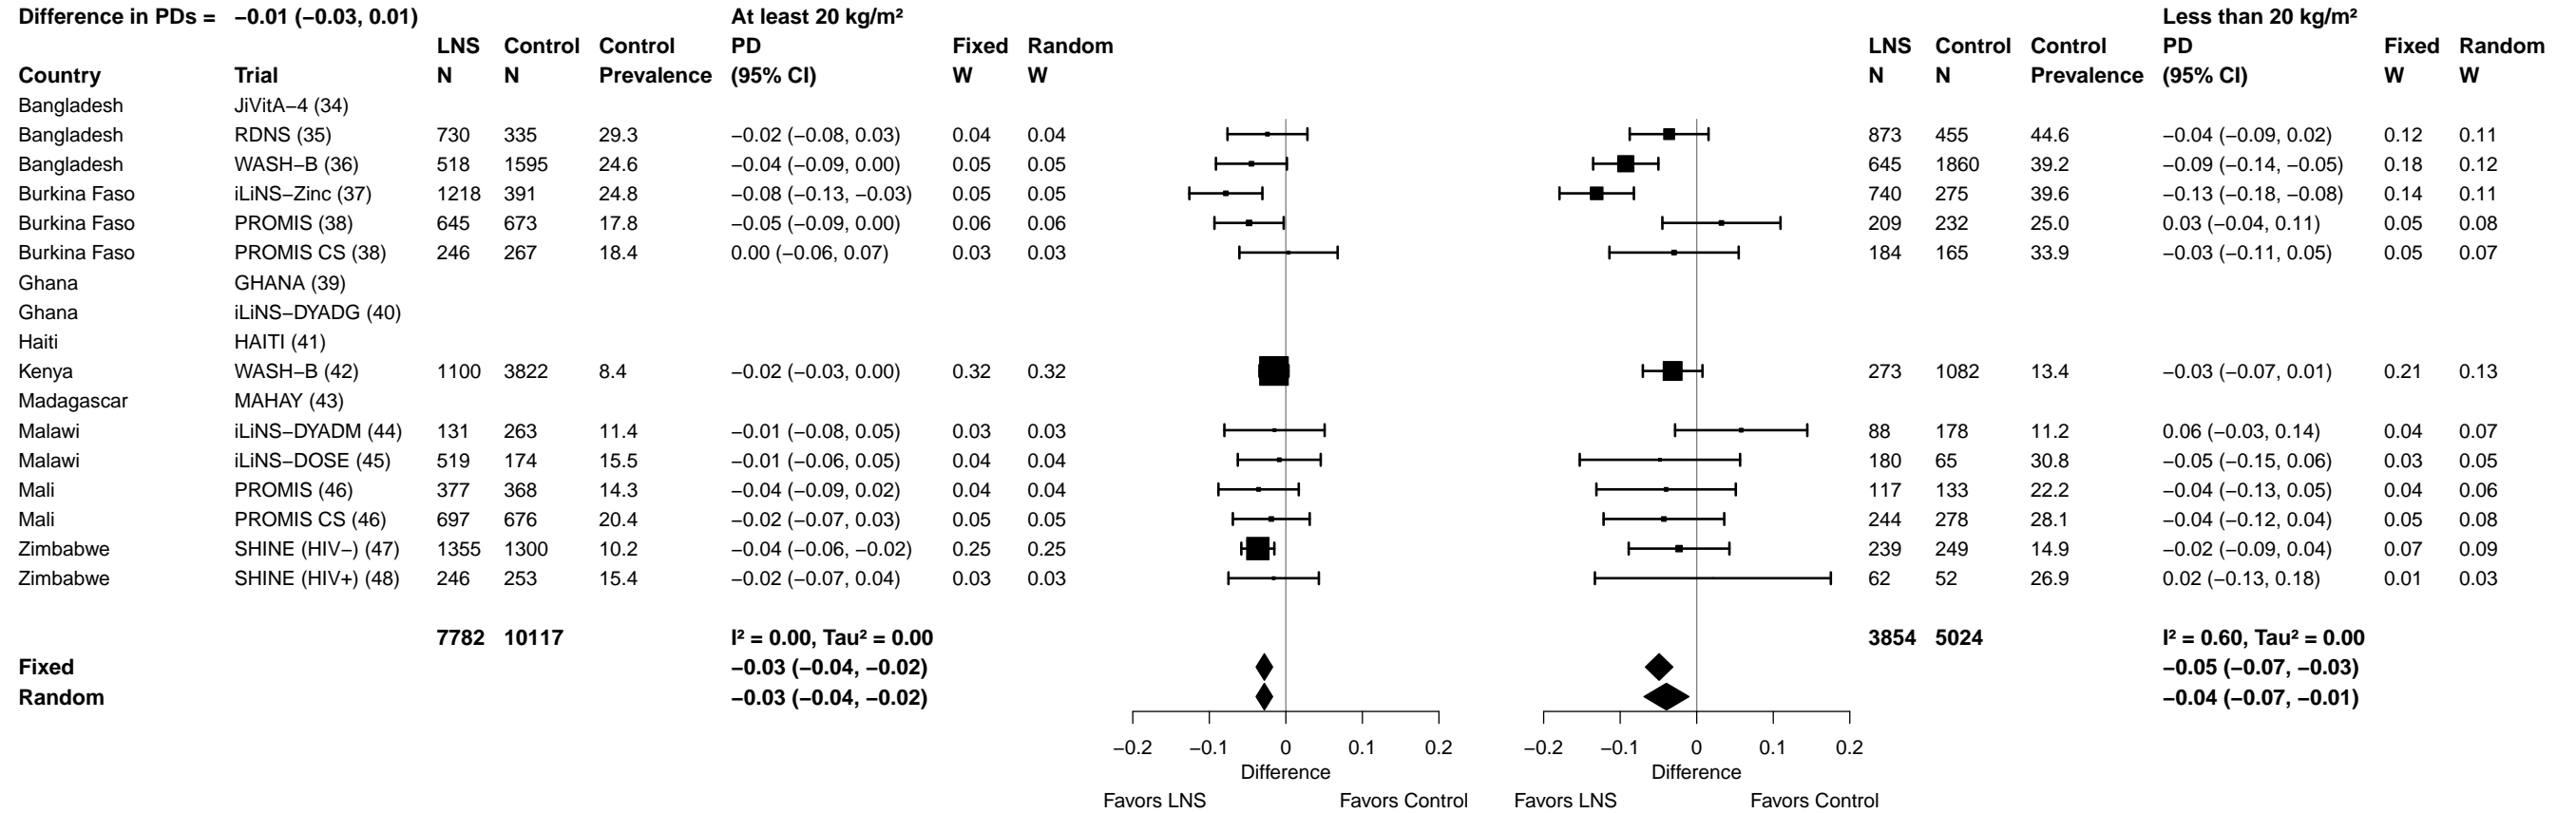

Supplemental figure 6N: Underweight prevalence difference

6N3: Stratified by Maternal age

P-for-interaction = 0.628

Difference in PDs = 0.00 (-0.01, 0.02)

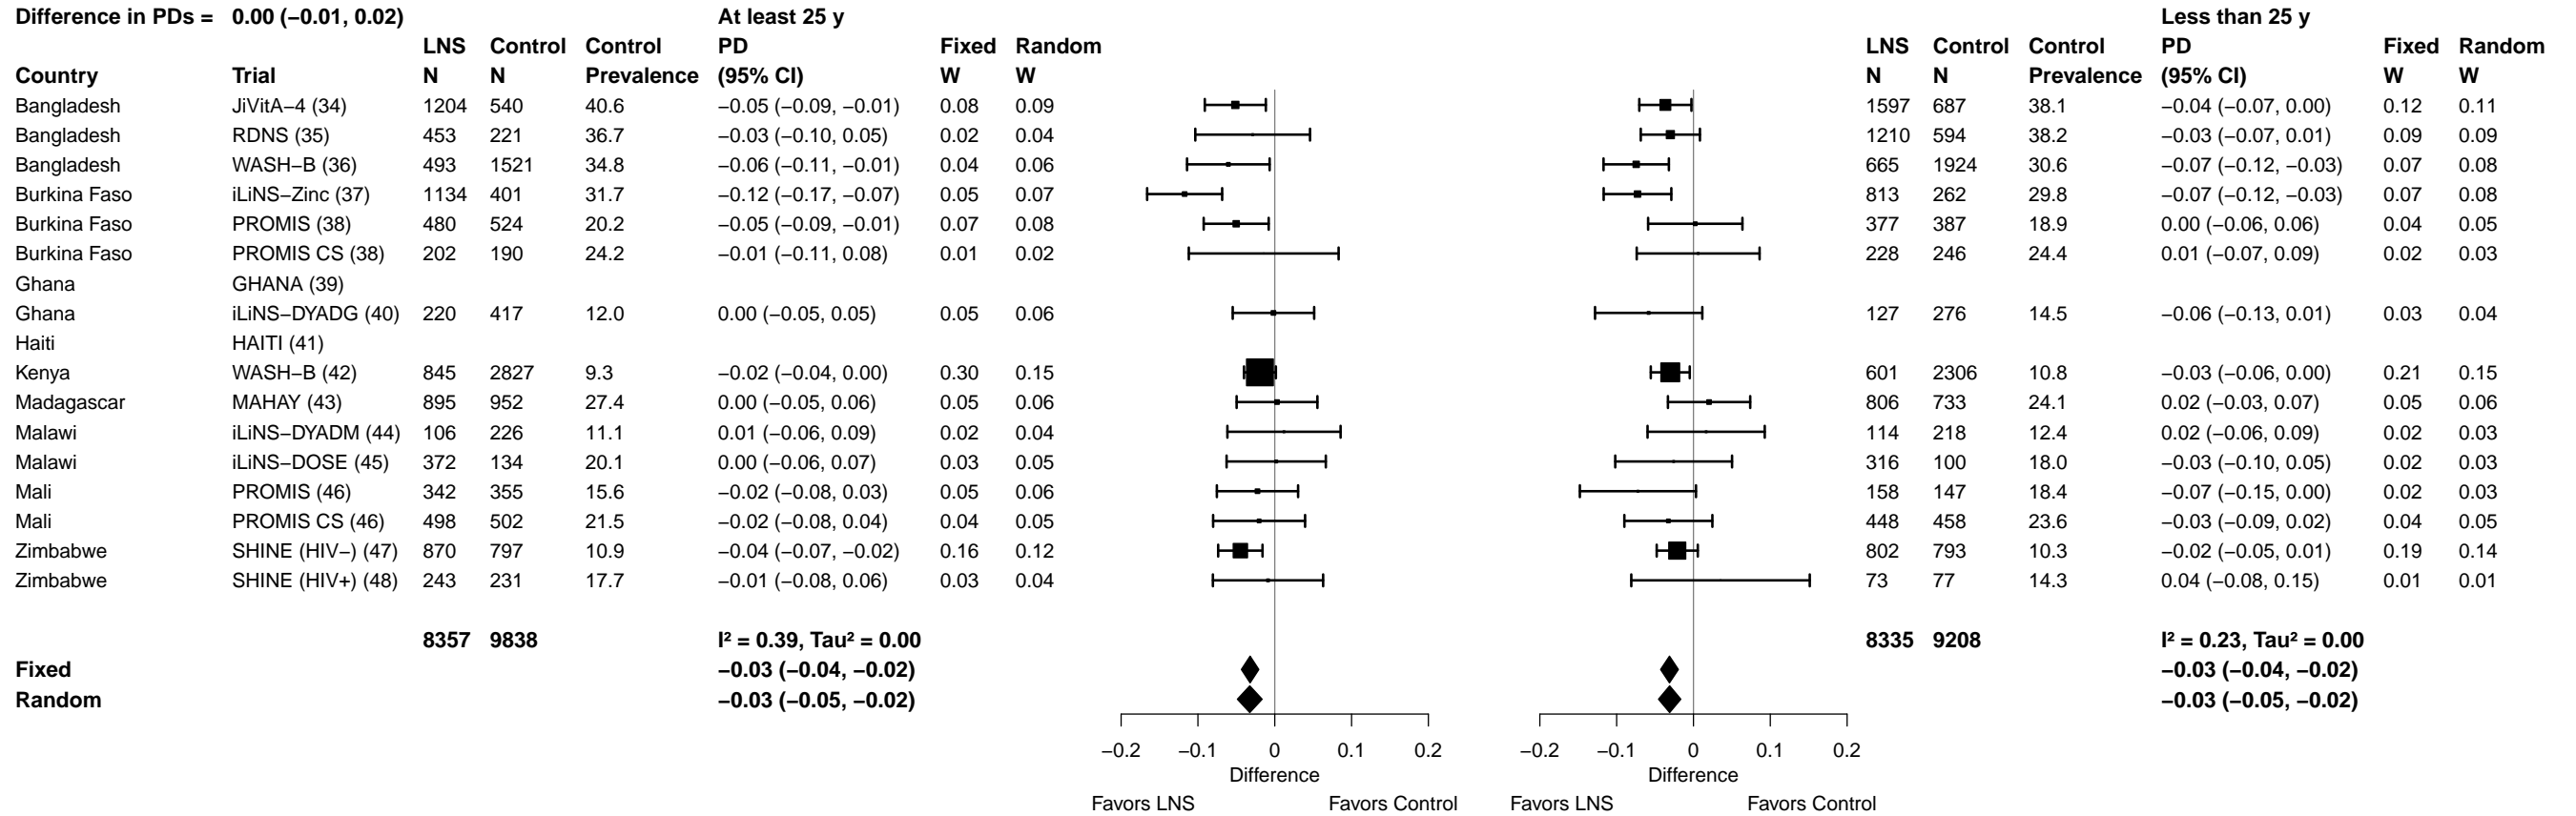

Supplemental figure 6N: Underweight prevalence difference

6N4: Stratified by Maternal education

P-for-interaction = 0.136

Difference in PDs = -0.02 (-0.04, 0.01)

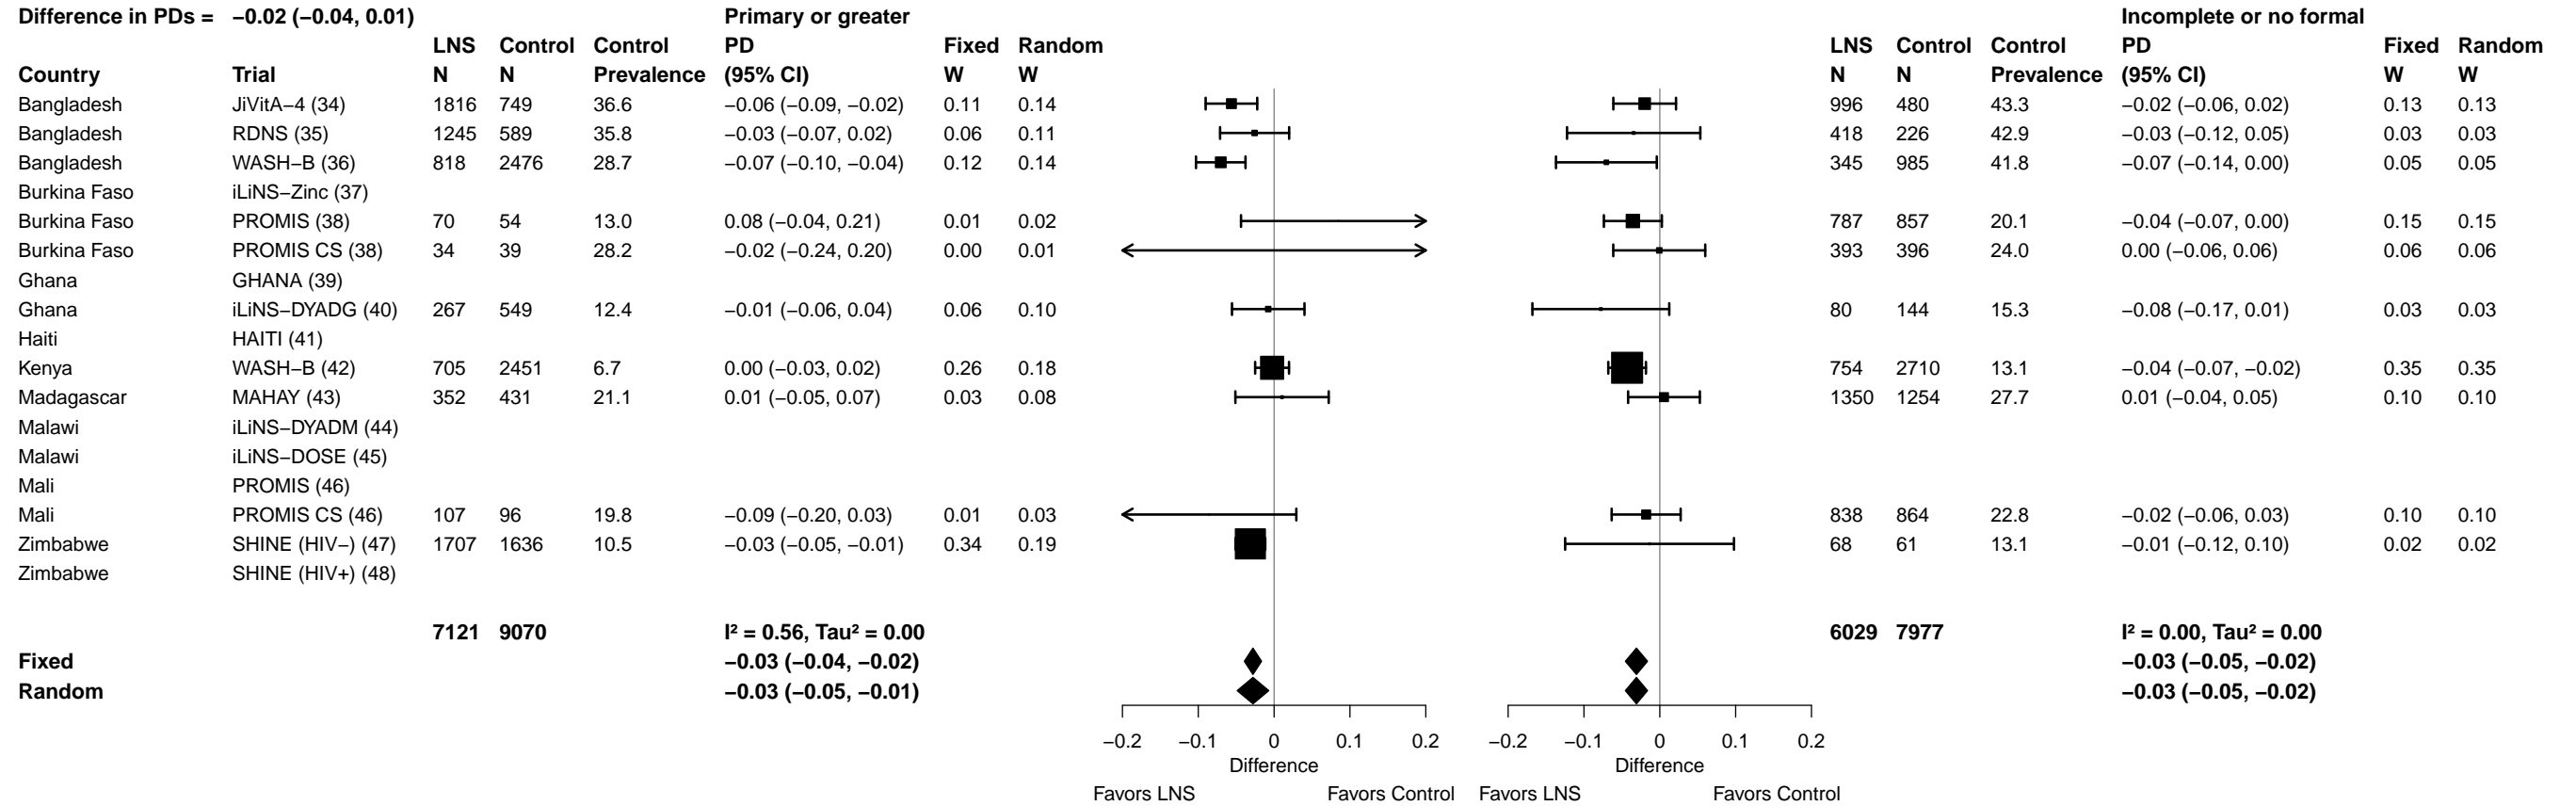

Supplemental figure 6N: Underweight prevalence difference

6N5: Stratified by Maternal depressive symptoms

$I^2$ -for-interaction = 0.717

Difference in PDs = 0.00 (-0.02, 0.03)

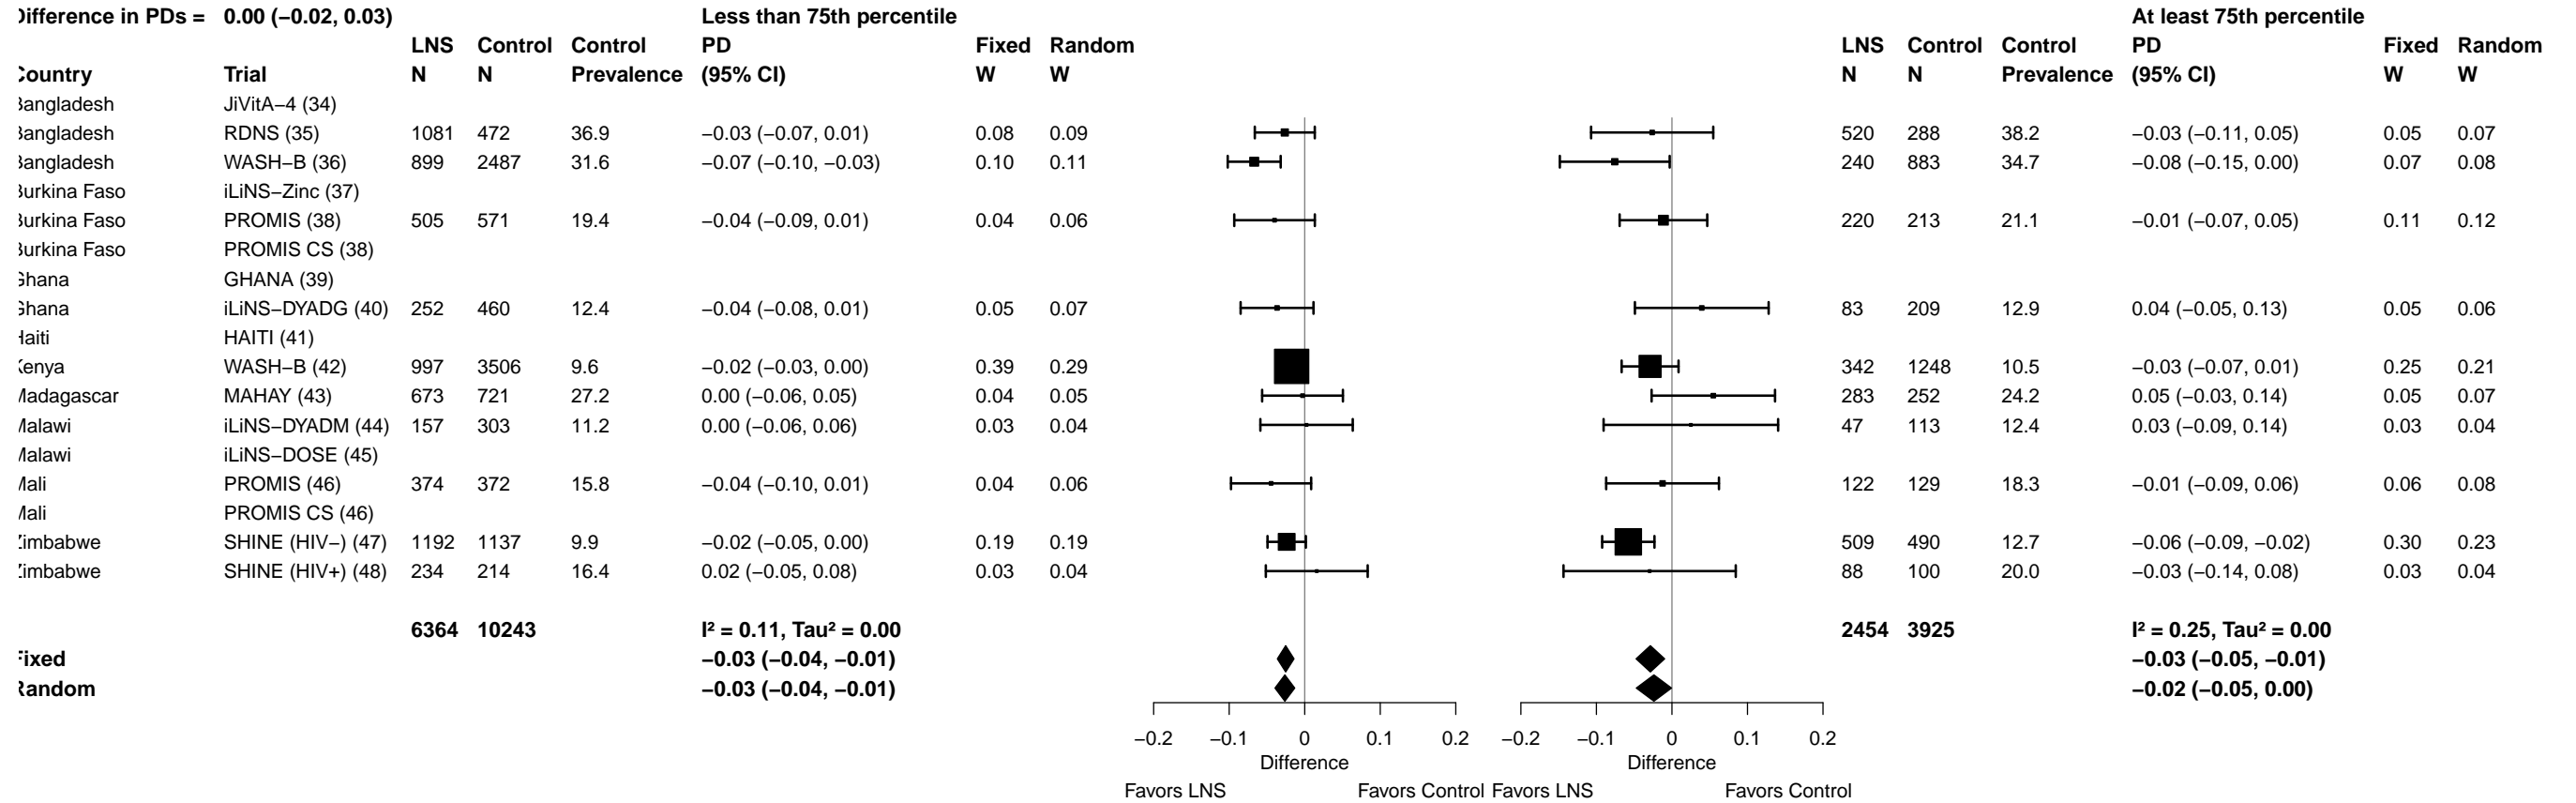



Supplemental figure 6N: Underweight prevalence difference

6N6: Stratified by Child sex

P-for-interaction = 0.231

Difference in PDs = 0.01 (-0.01, 0.03)

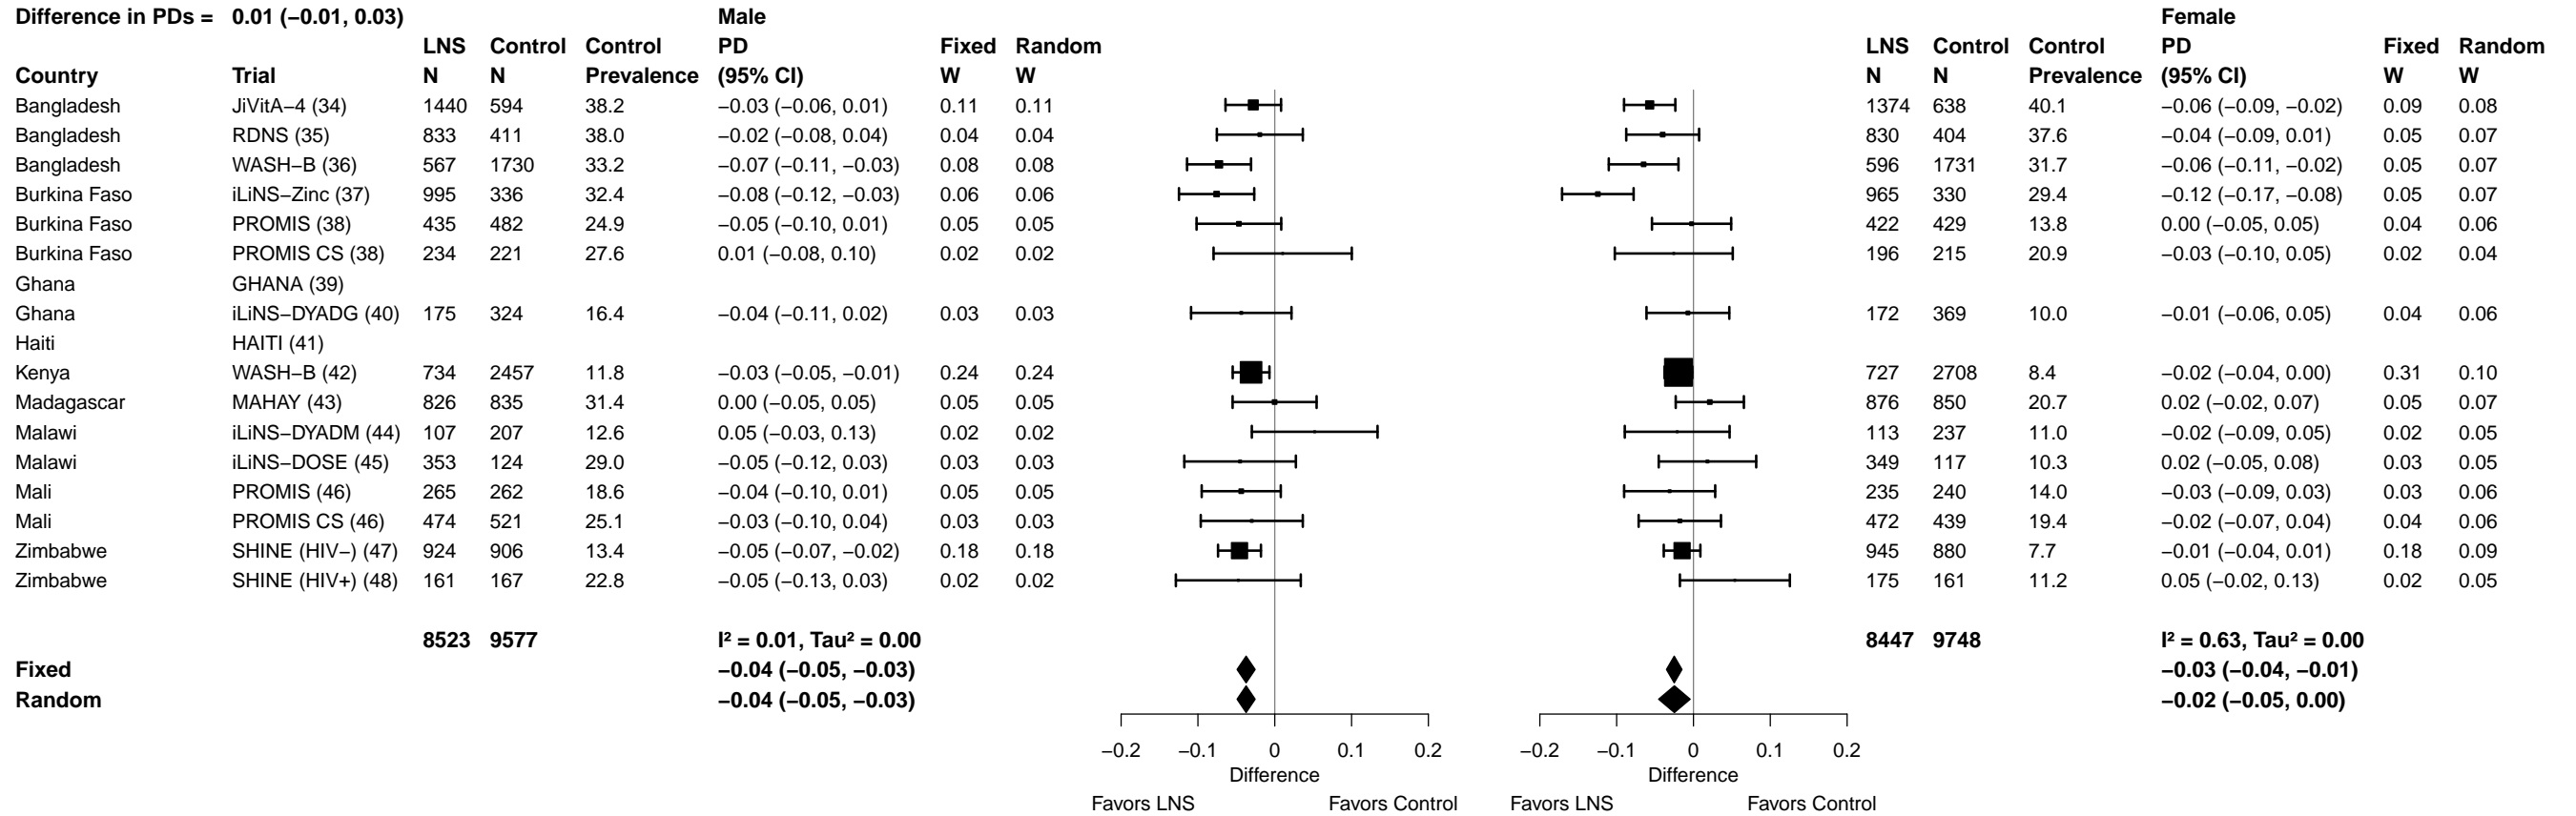

Supplemental figure 6N: Underweight prevalence difference

6N7: Stratified by Child birth order

P-for-interaction = 0.043  
 Difference in PDs = 0.02 (0.00, 0.04)

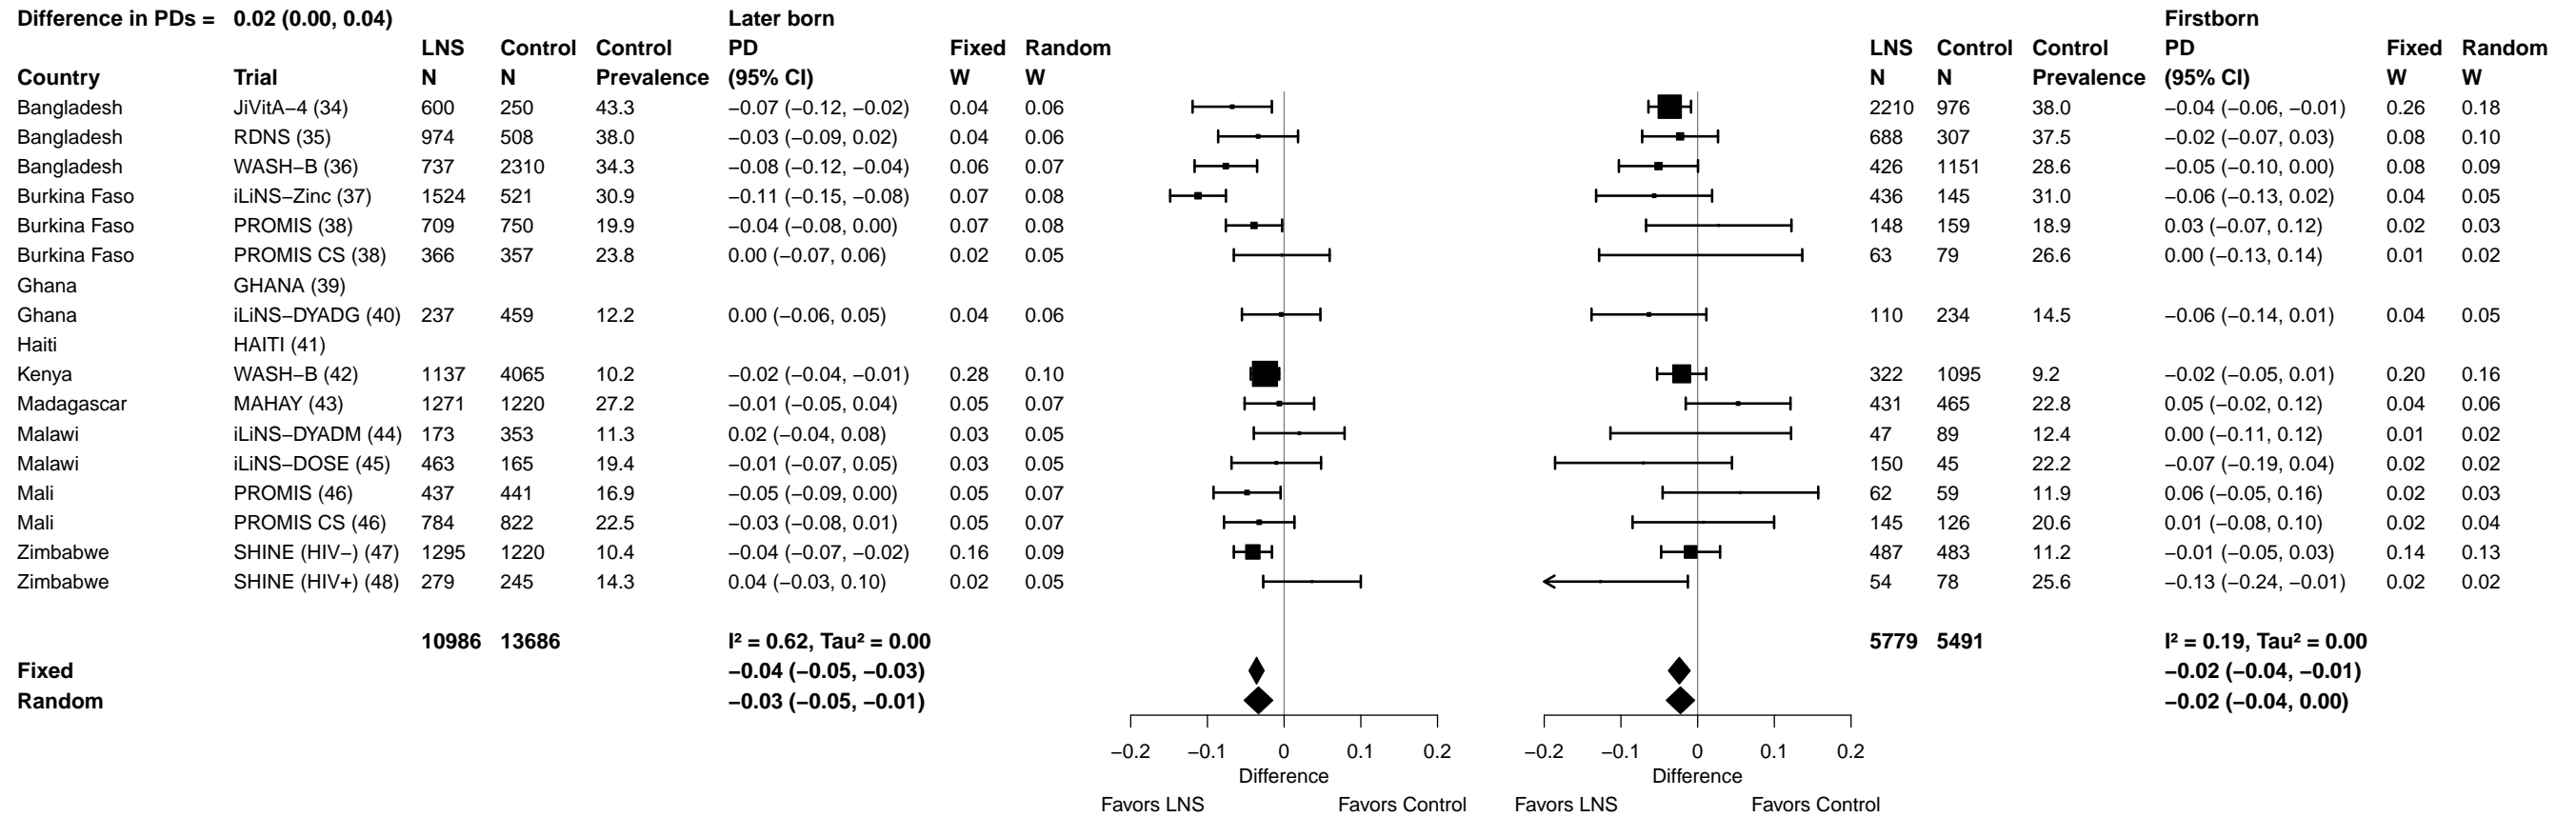

Supplemental figure 6N: Underweight prevalence difference

6N8: Stratified by Child baseline anthropometric status

P-for-interaction = 0.004

Difference in PDs = -0.04 (-0.07, -0.01)

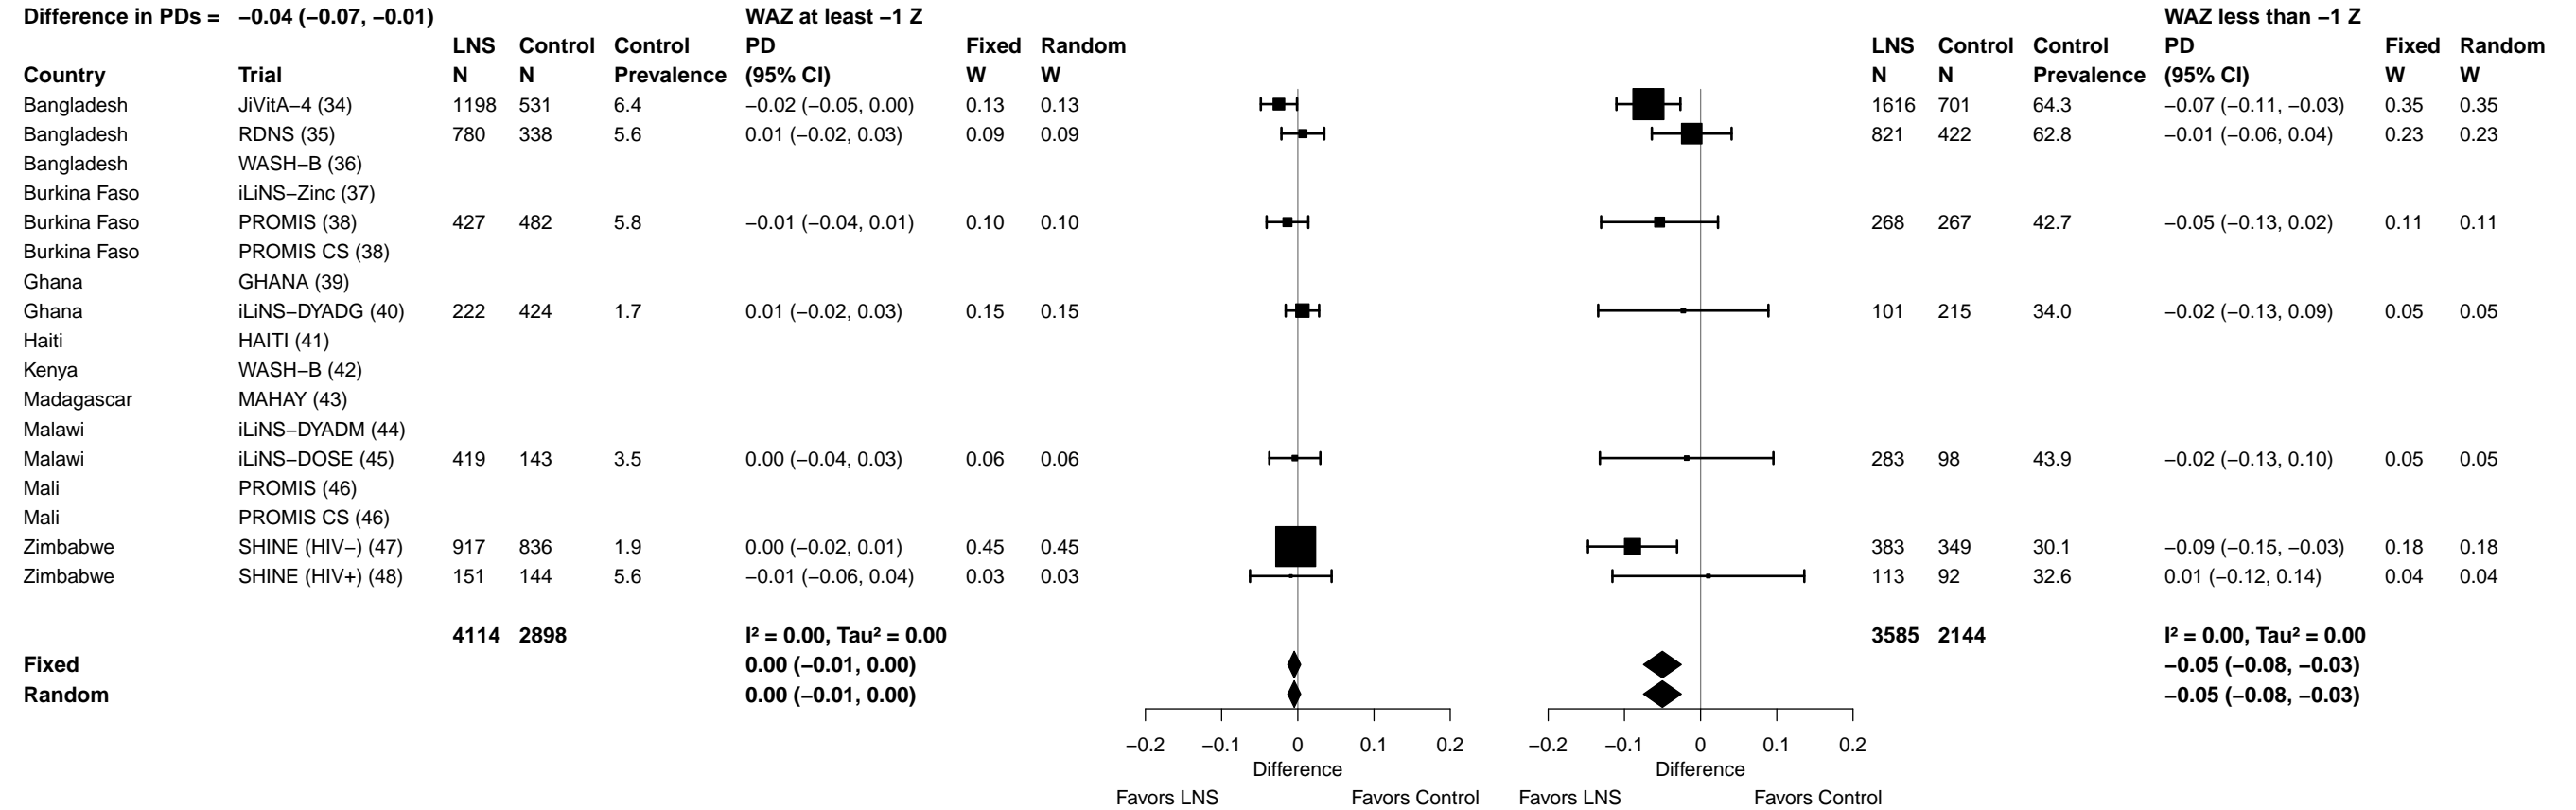

### Supplemental figure 6O: Mean difference in HCZ

#### 6O1: Stratified by Maternal height

**P-for-interaction = 0.185**  
**Difference in MDs = 0.05 (-0.03, 0.13)**

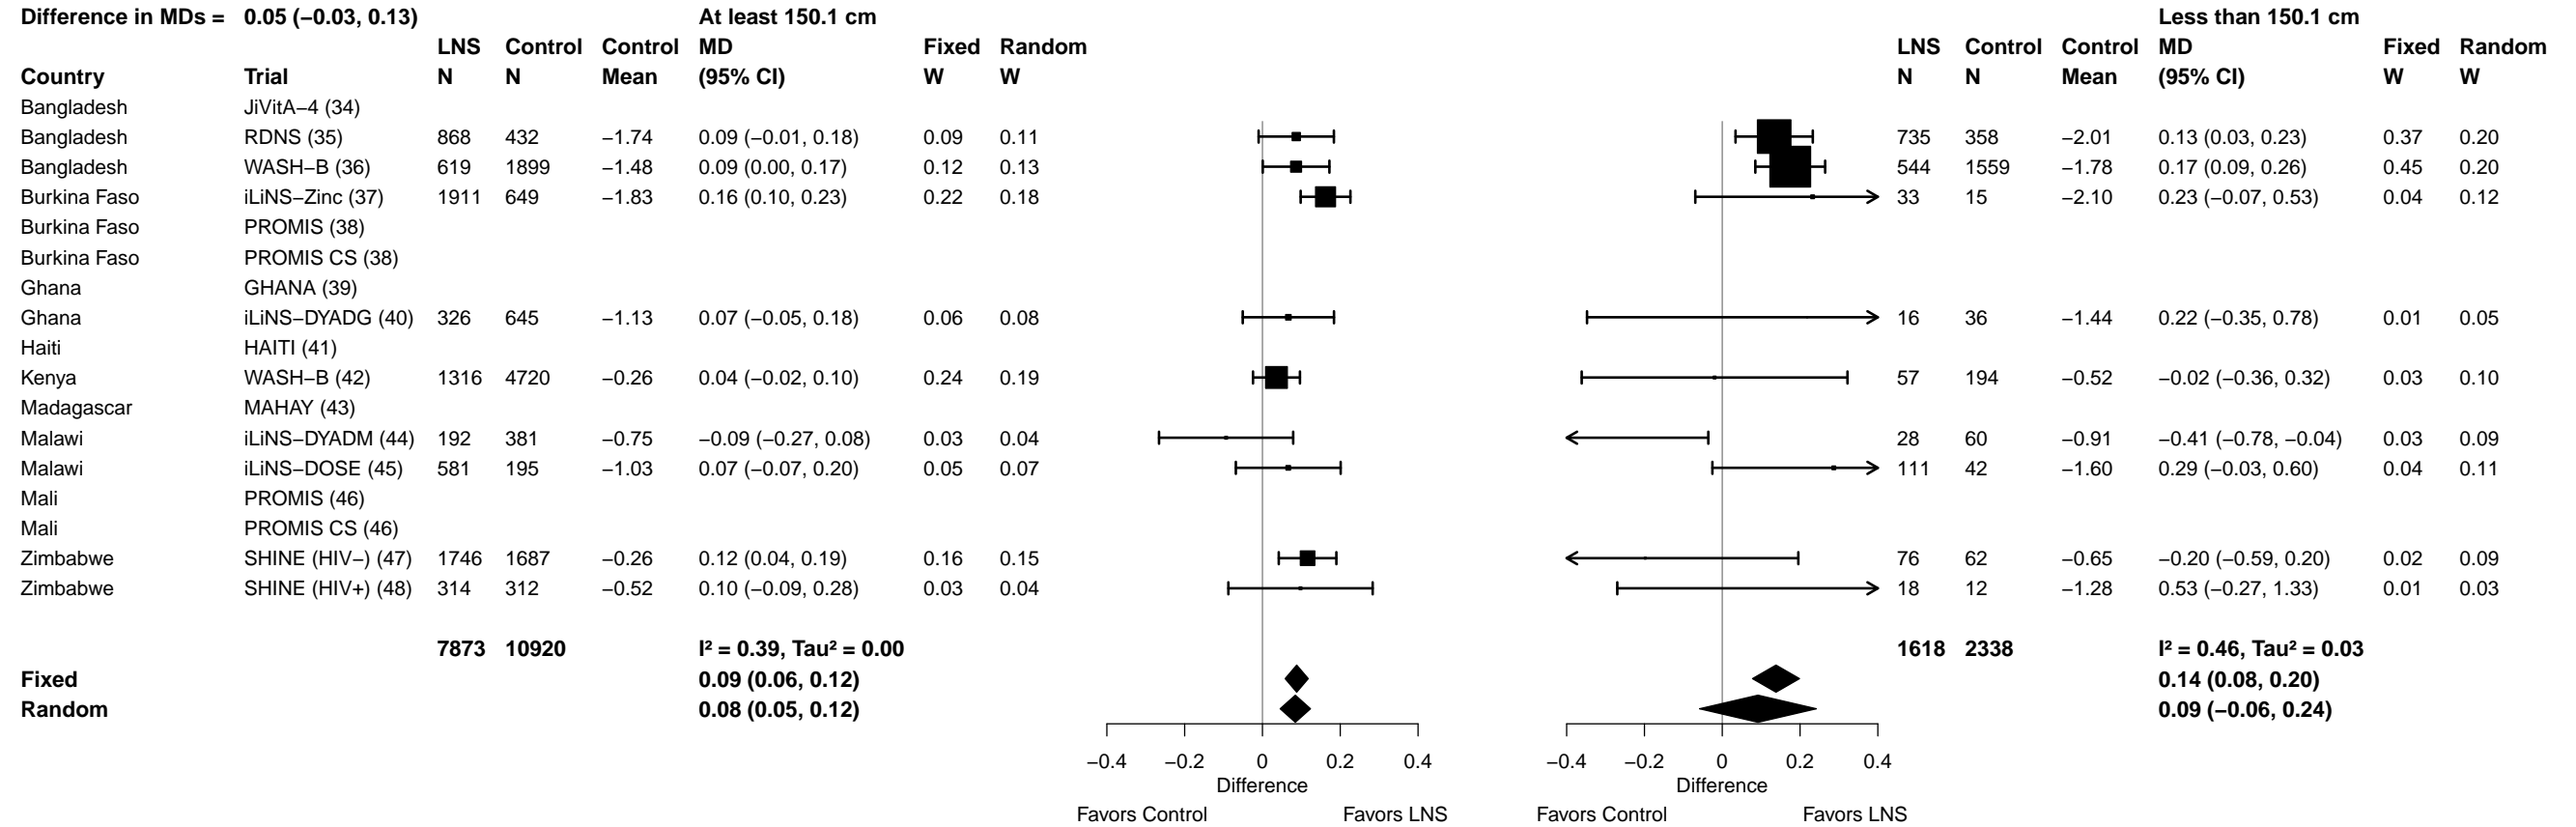





Supplemental figure 6O: Mean difference in HCZ

6O4: Stratified by Maternal education

P-for-interaction = 0.711

Difference in MDs = 0.01 (-0.04, 0.06)

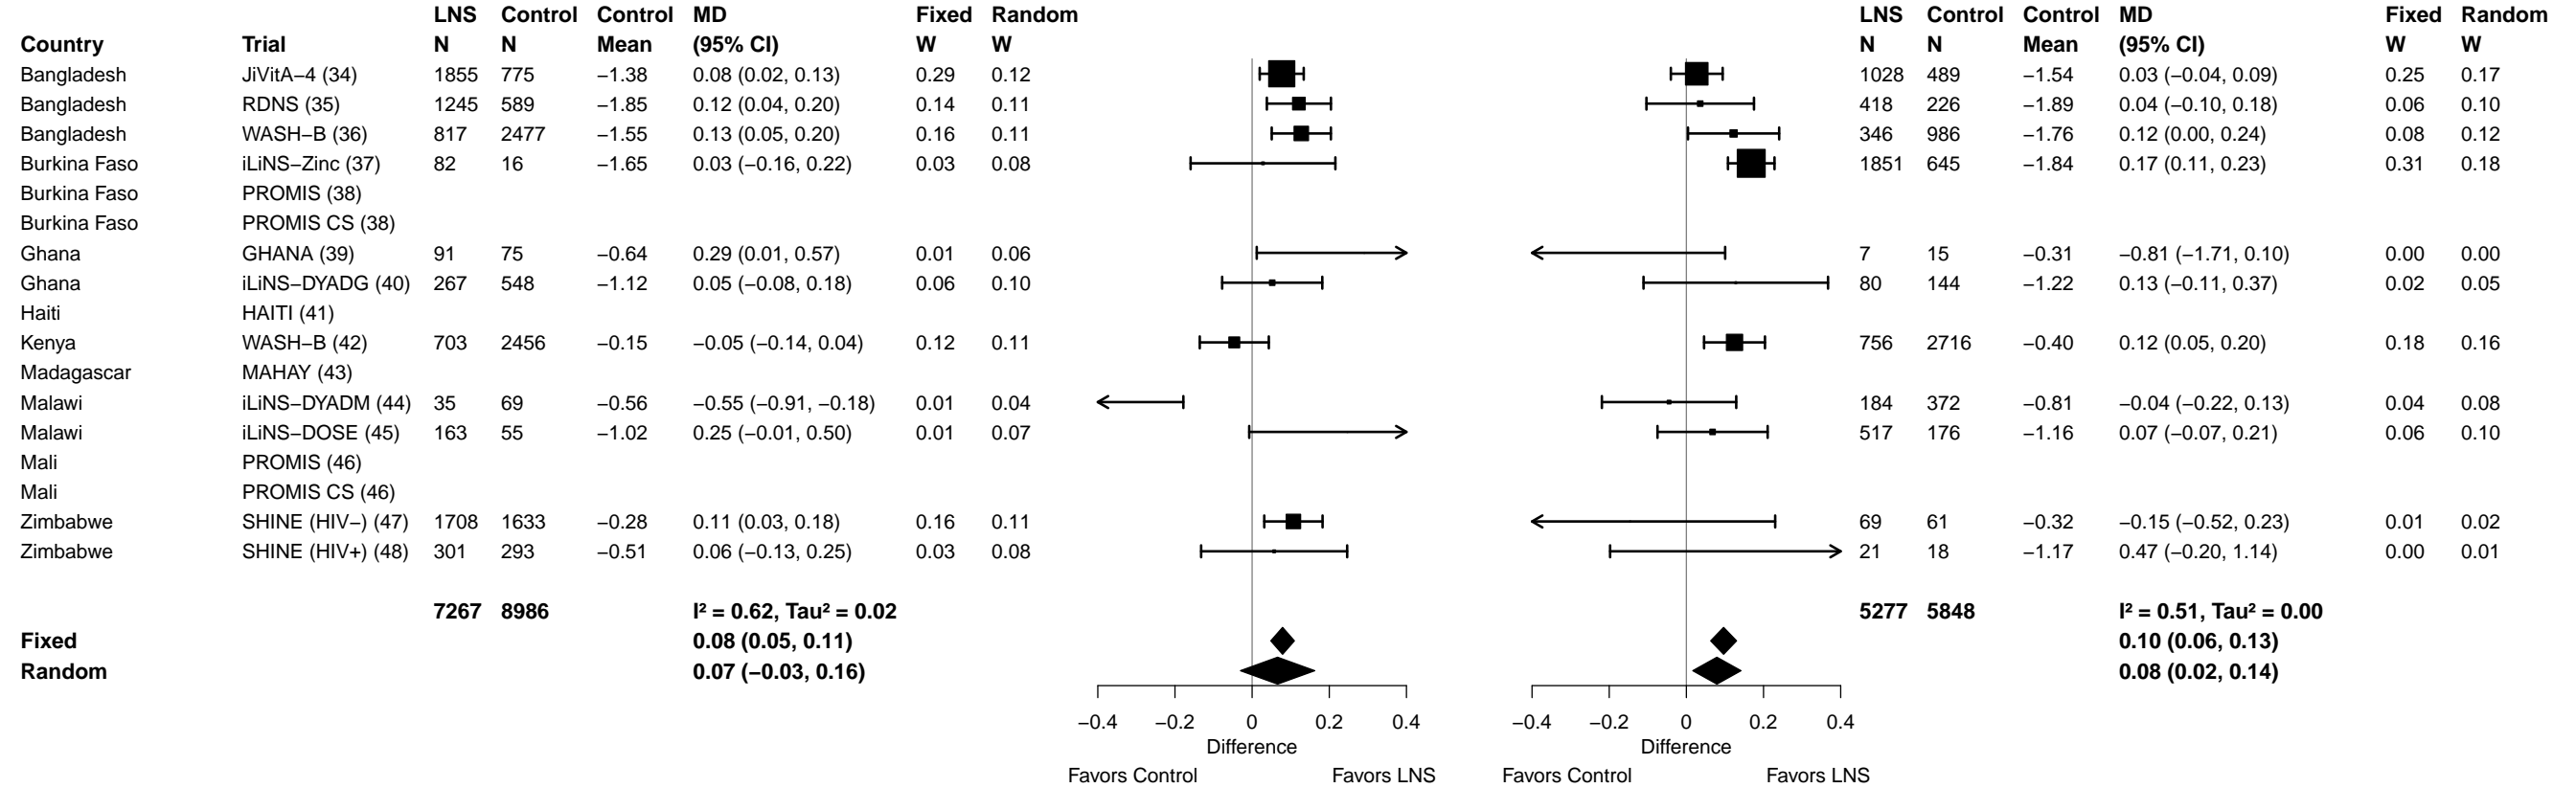

Supplemental figure 6O: Mean difference in HCZ

6O5: Stratified by Maternal depressive symptoms

P-for-interaction = 0.386

Difference in MDs = -0.03 (-0.10, 0.04)

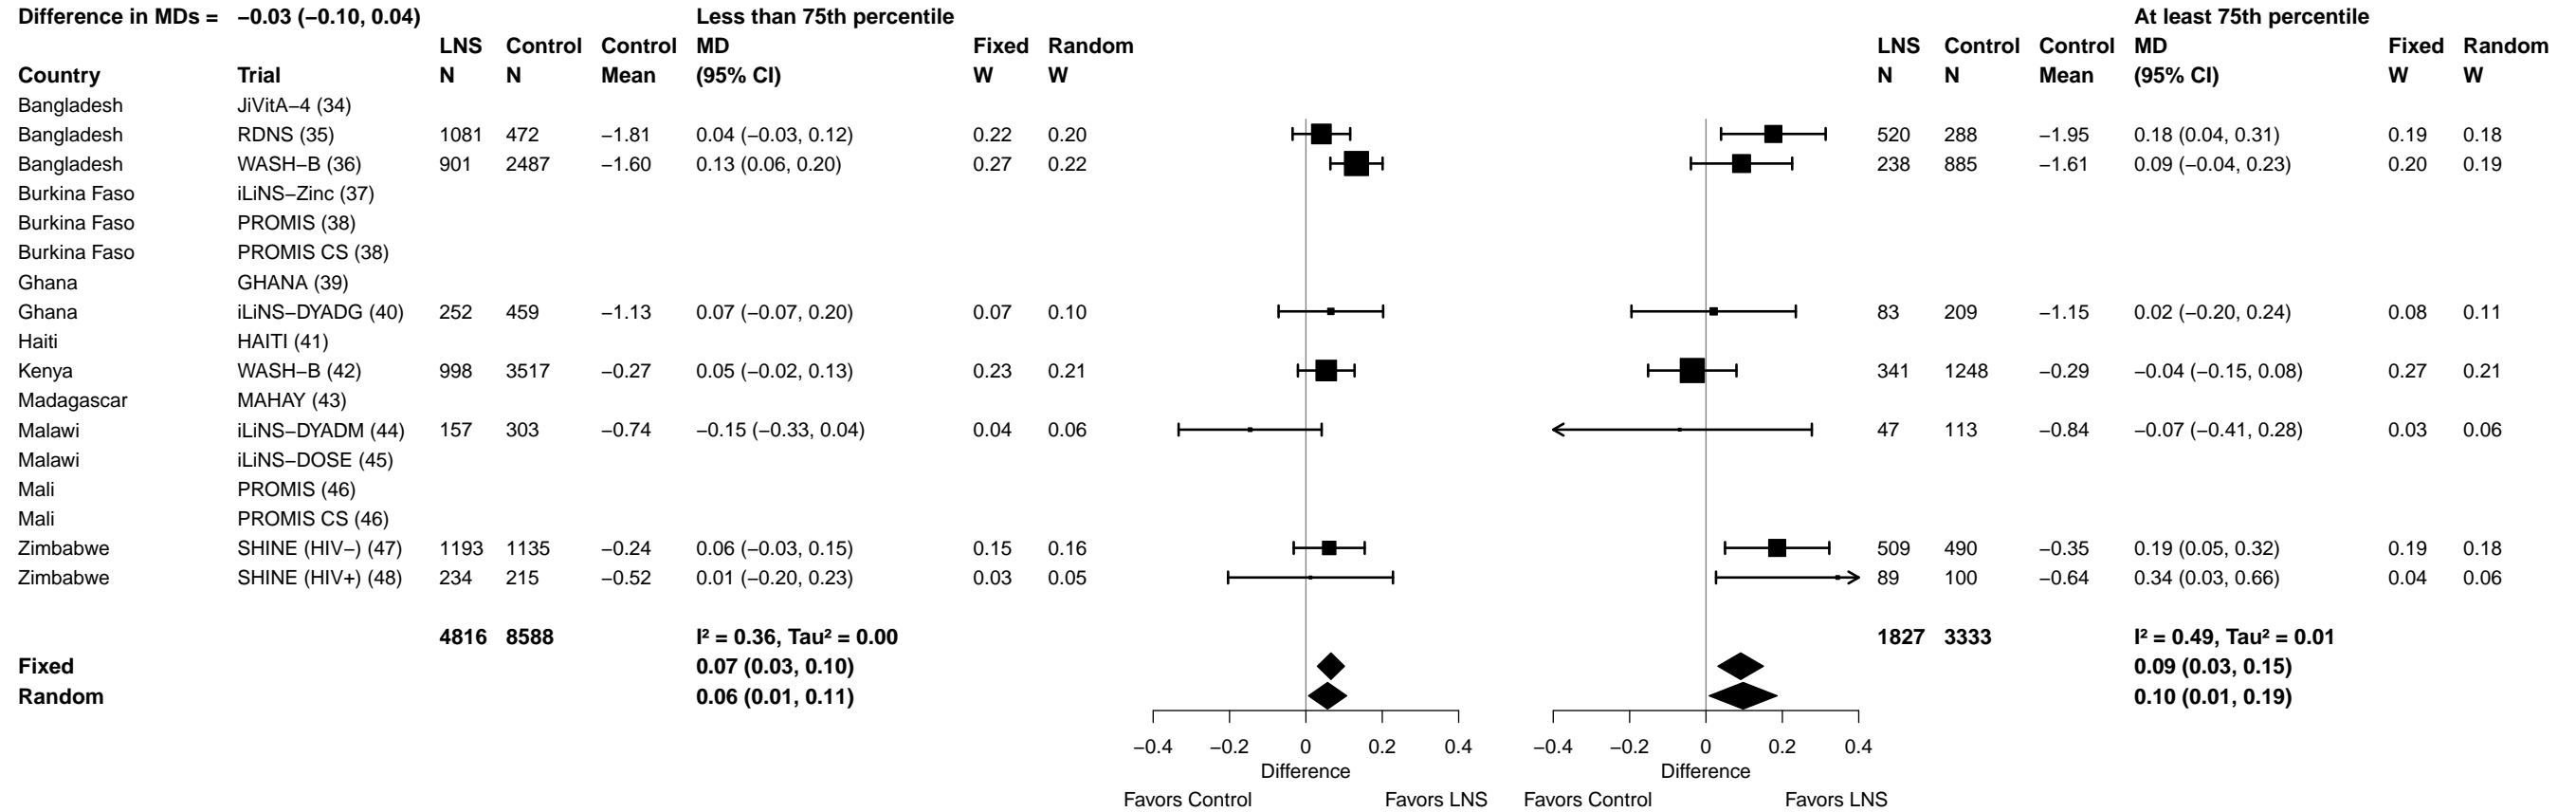





Supplemental figure 6O: Mean difference in HCZ

6O7: Stratified by Child birth order

P-for-interaction = 0.966

Difference in MDs = 0.00 (-0.04, 0.04)

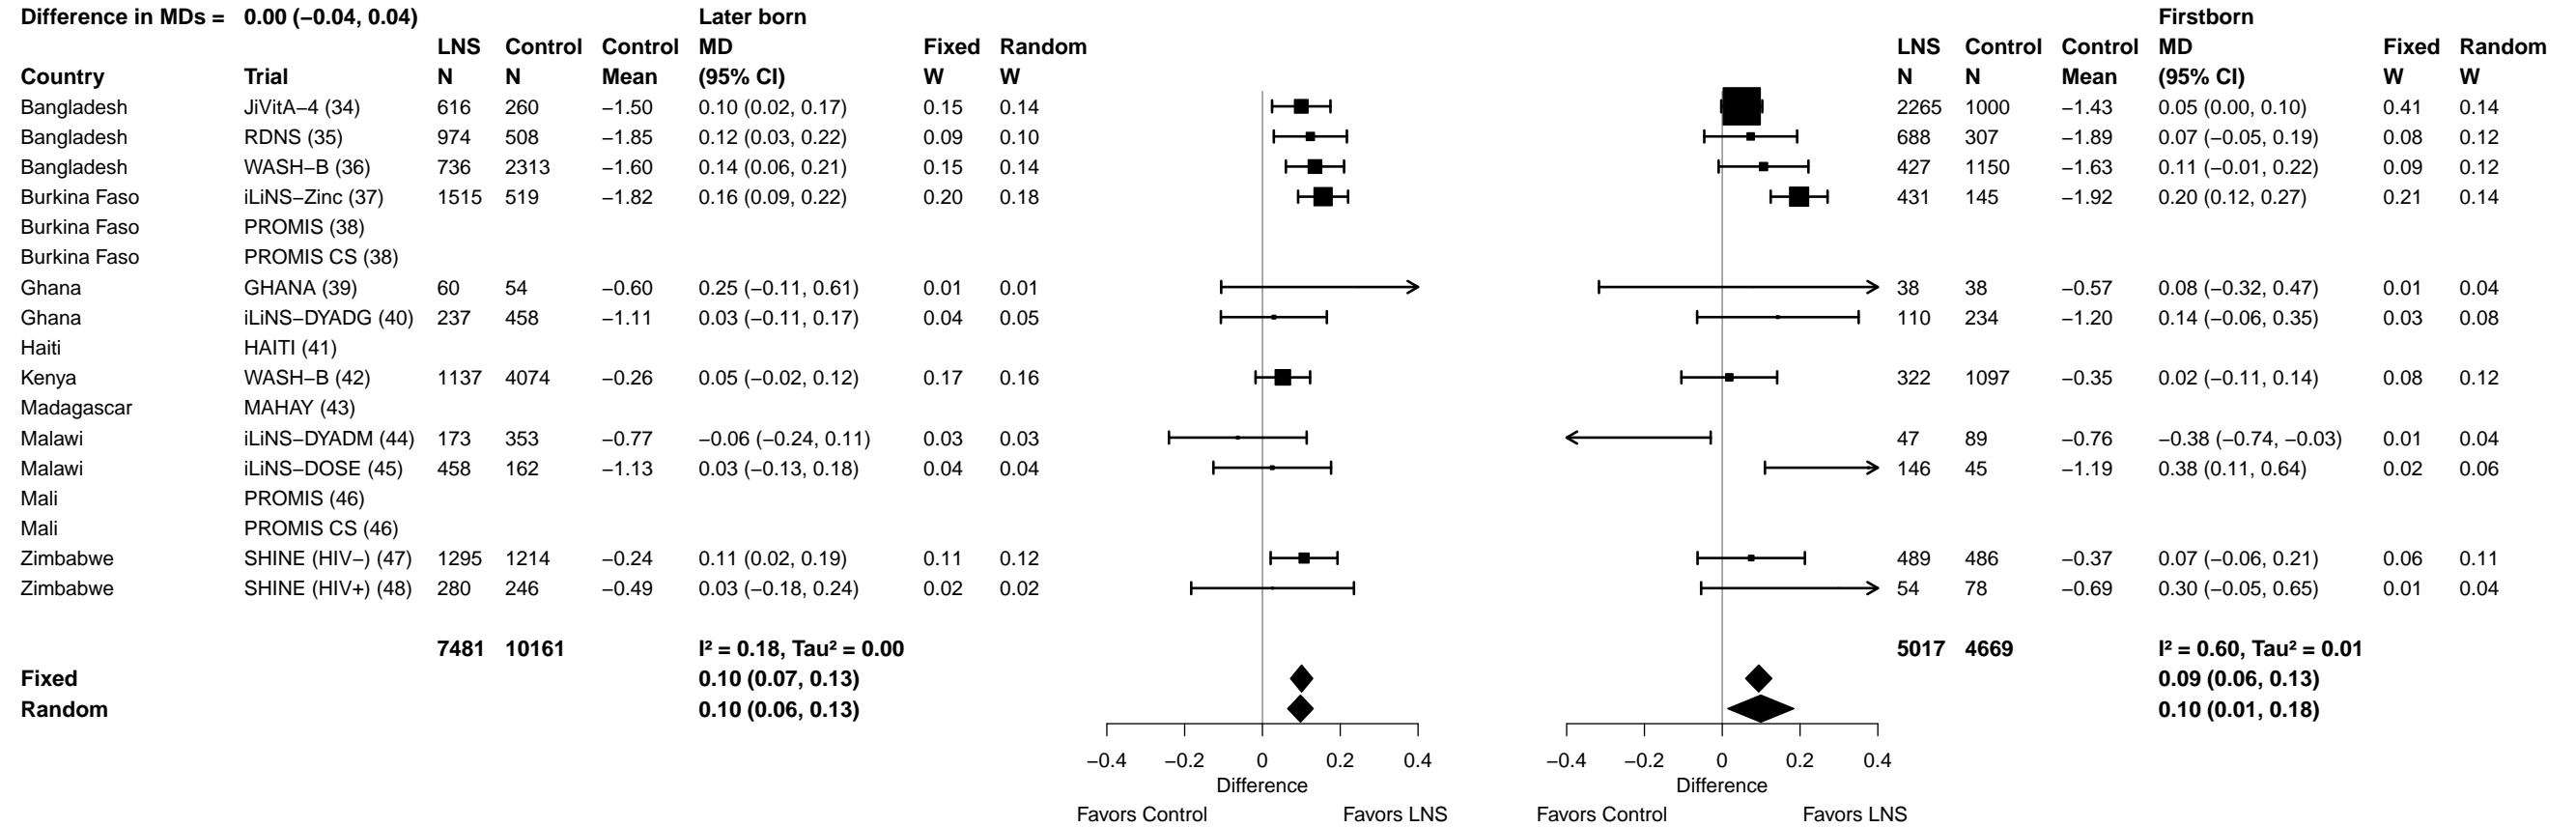

Supplemental figure 6O: Mean difference in HCZ

6O8: Stratified by Child baseline anthropometric status

P-for-interaction = 0.980

Difference in MDs = 0.00 (-0.05, 0.05)

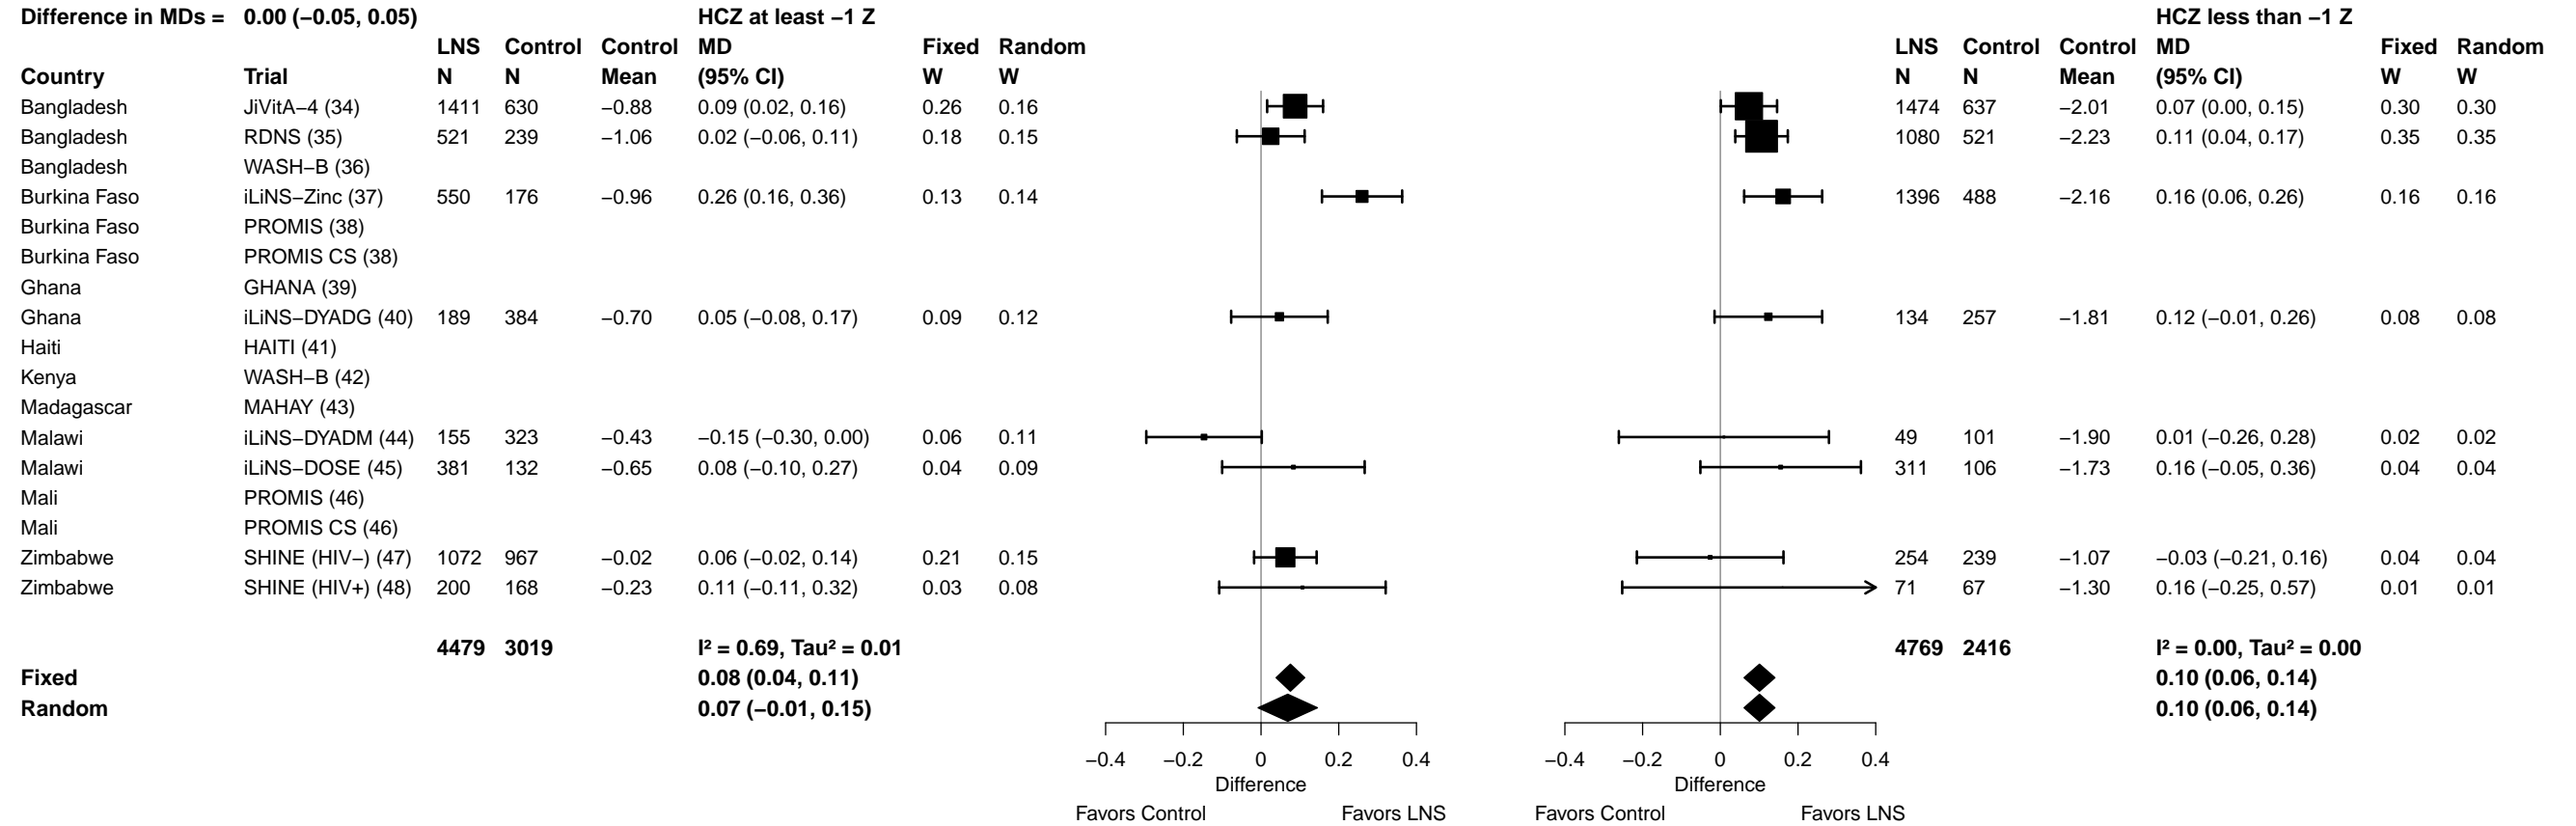

### Supplemental figure 6P: Small head size prevalence ratio

#### 6P1: Stratified by Maternal height

**P-for-interaction = 0.420**  
**Ratio of PRs = 0.95 (0.85, 1.07)**

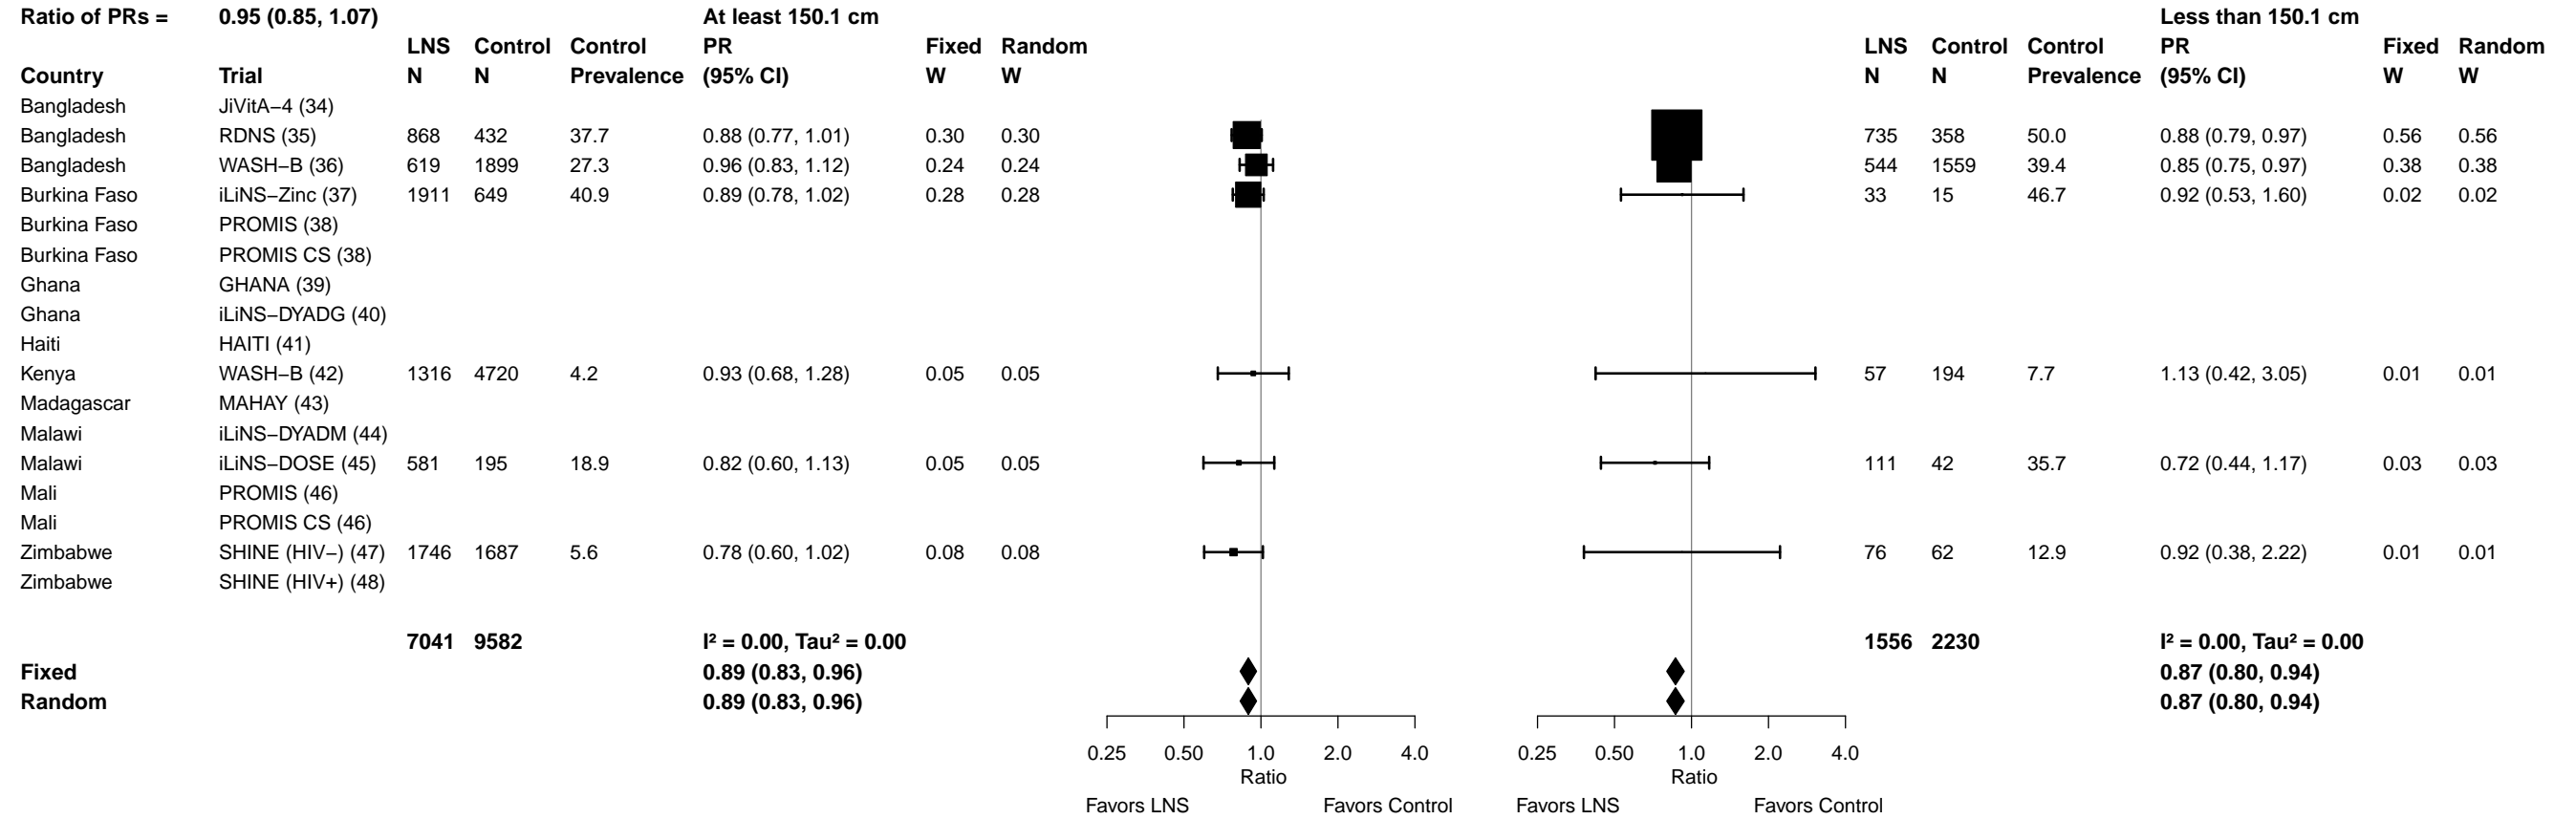

Supplemental figure 6P: Small head size prevalence ratio

6P2: Stratified by Maternal BMI

P-for-interaction = 0.607

Ratio of PRs = 0.97 (0.88, 1.08)

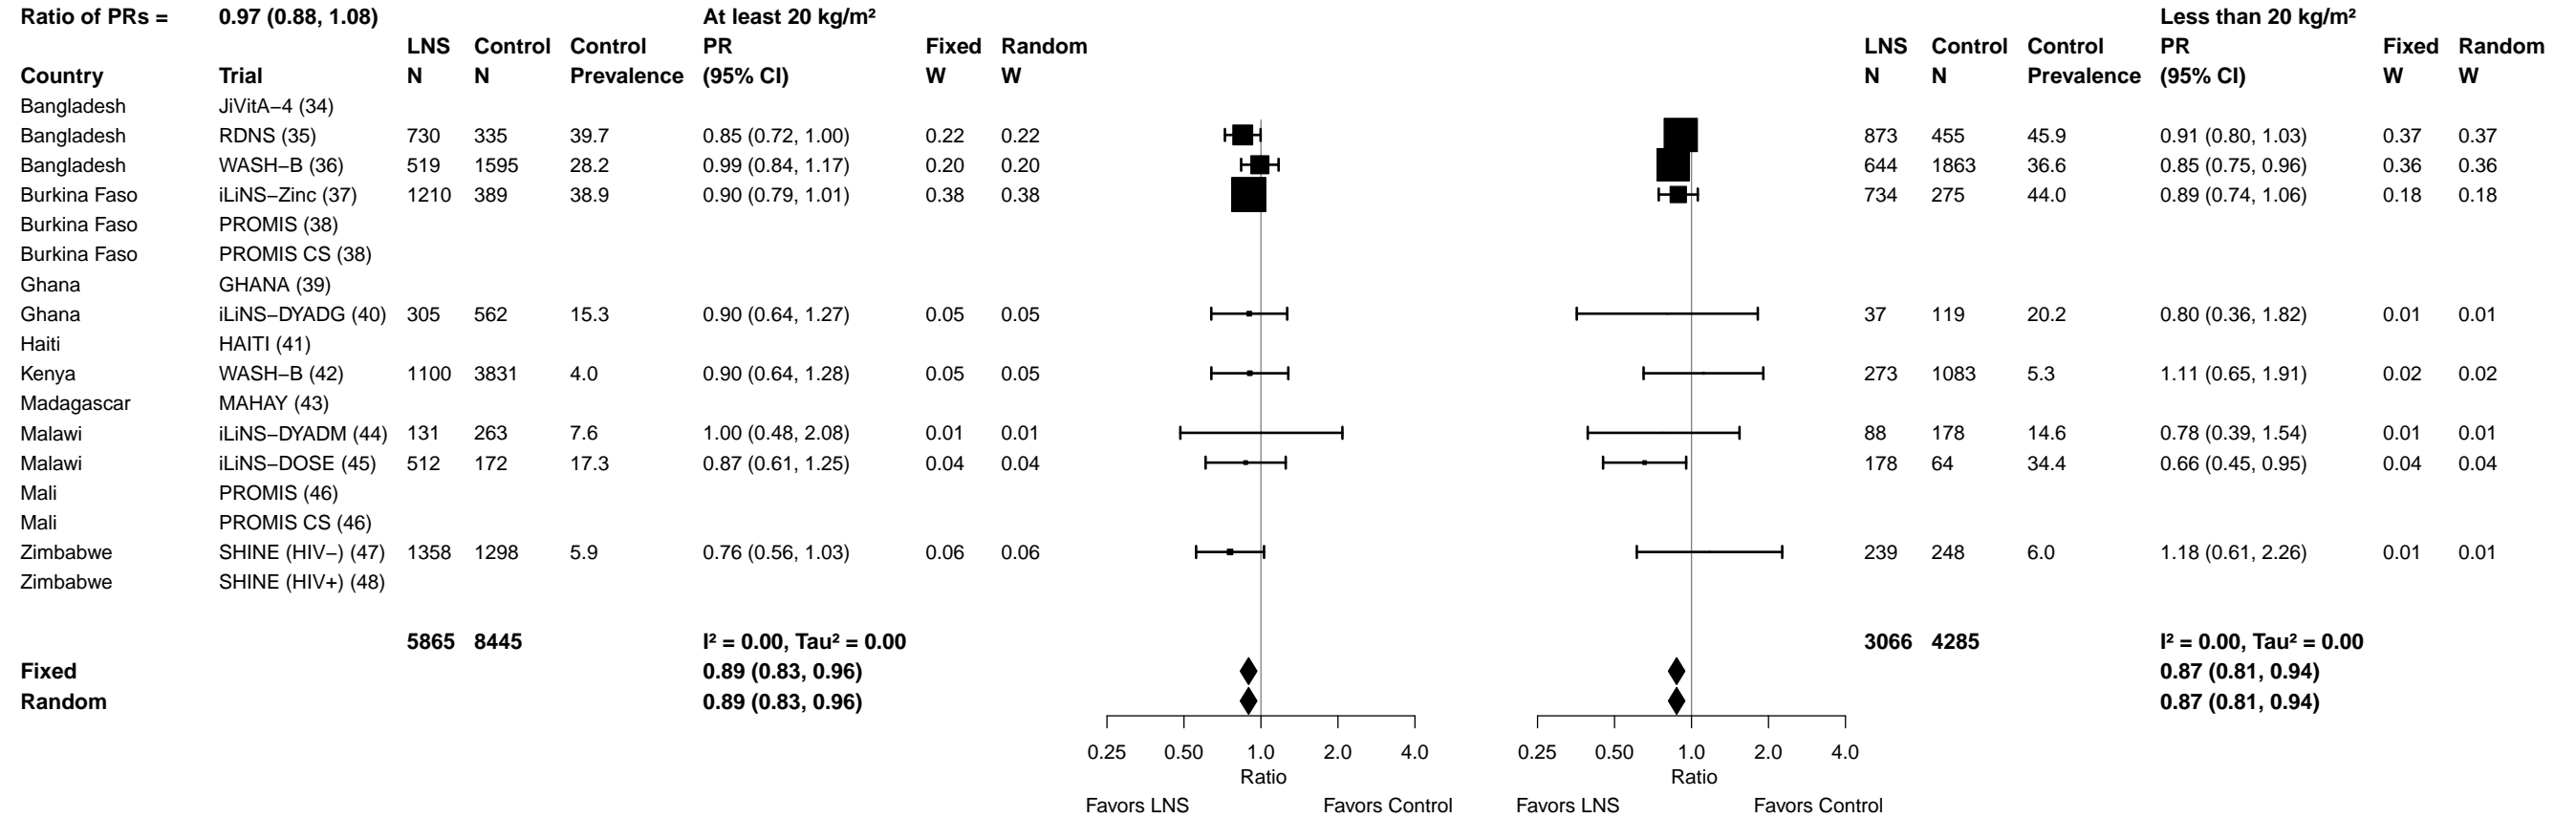



Supplemental figure 6P: Small head size prevalence ratio

6P4: Stratified by Maternal education

P-for-interaction = 0.091

Ratio of PRs = 1.11 (0.98, 1.26)

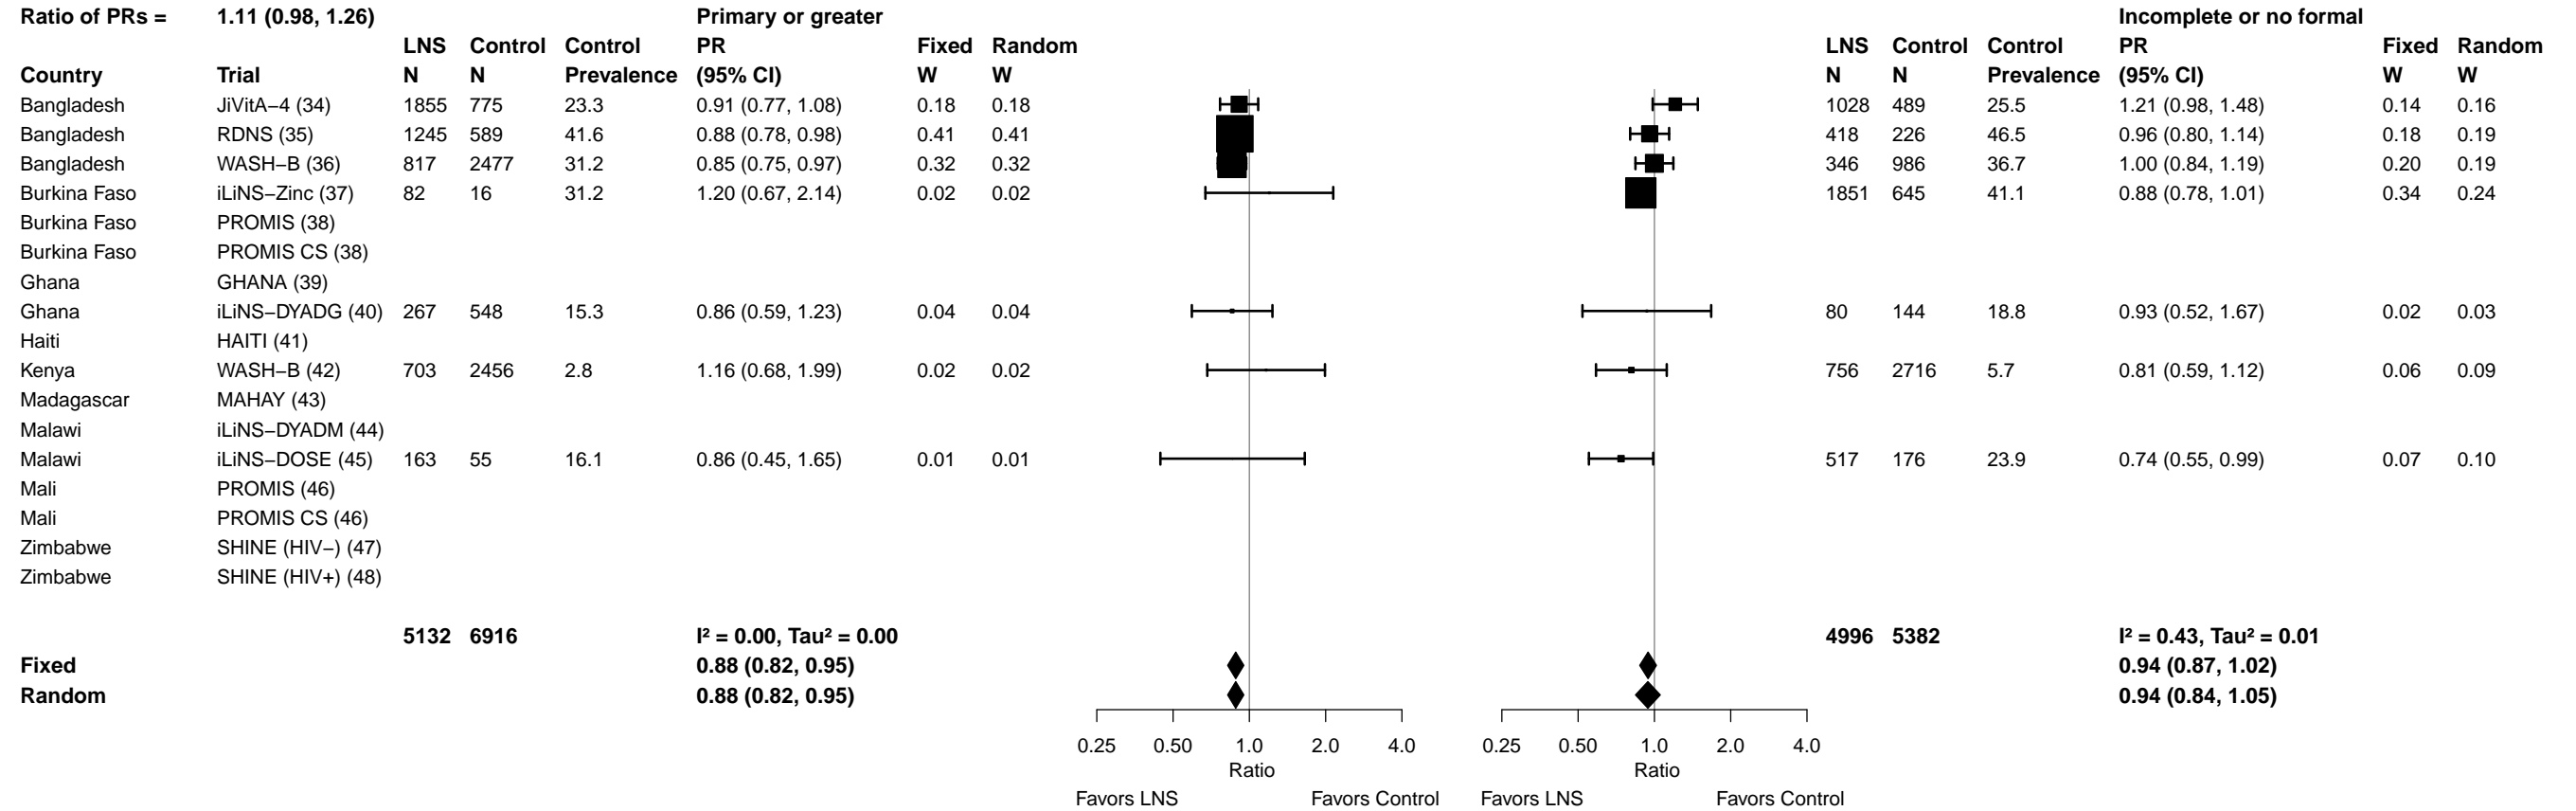

Supplemental figure 6P: Small head size prevalence ratio

6P5: Stratified by Maternal depressive symptoms

P-for-interaction = 0.095

Ratio of PRs = 1.12 (0.98, 1.27)

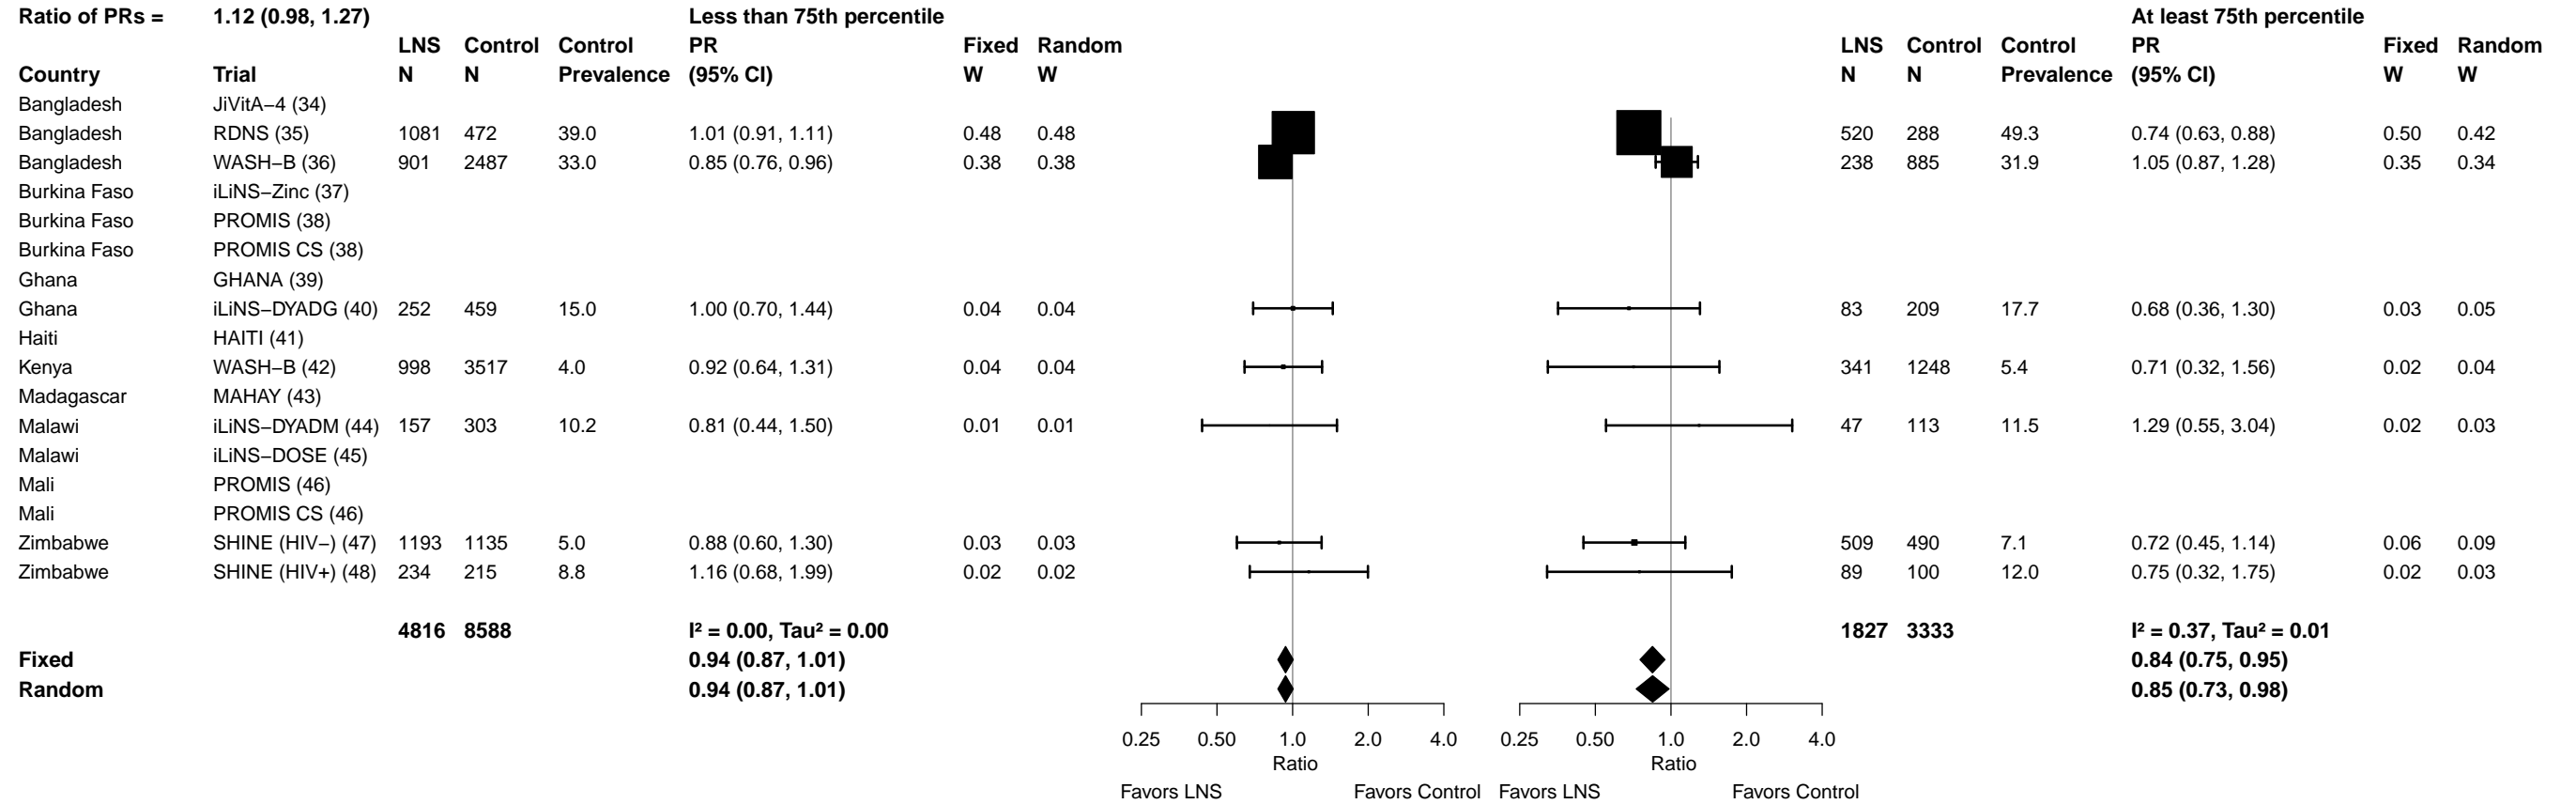



Supplemental figure 6P: Small head size prevalence ratio

6P6: Stratified by Child sex

P-for-interaction = 0.020  
 Ratio of PRs = 0.89 (0.81, 0.98)

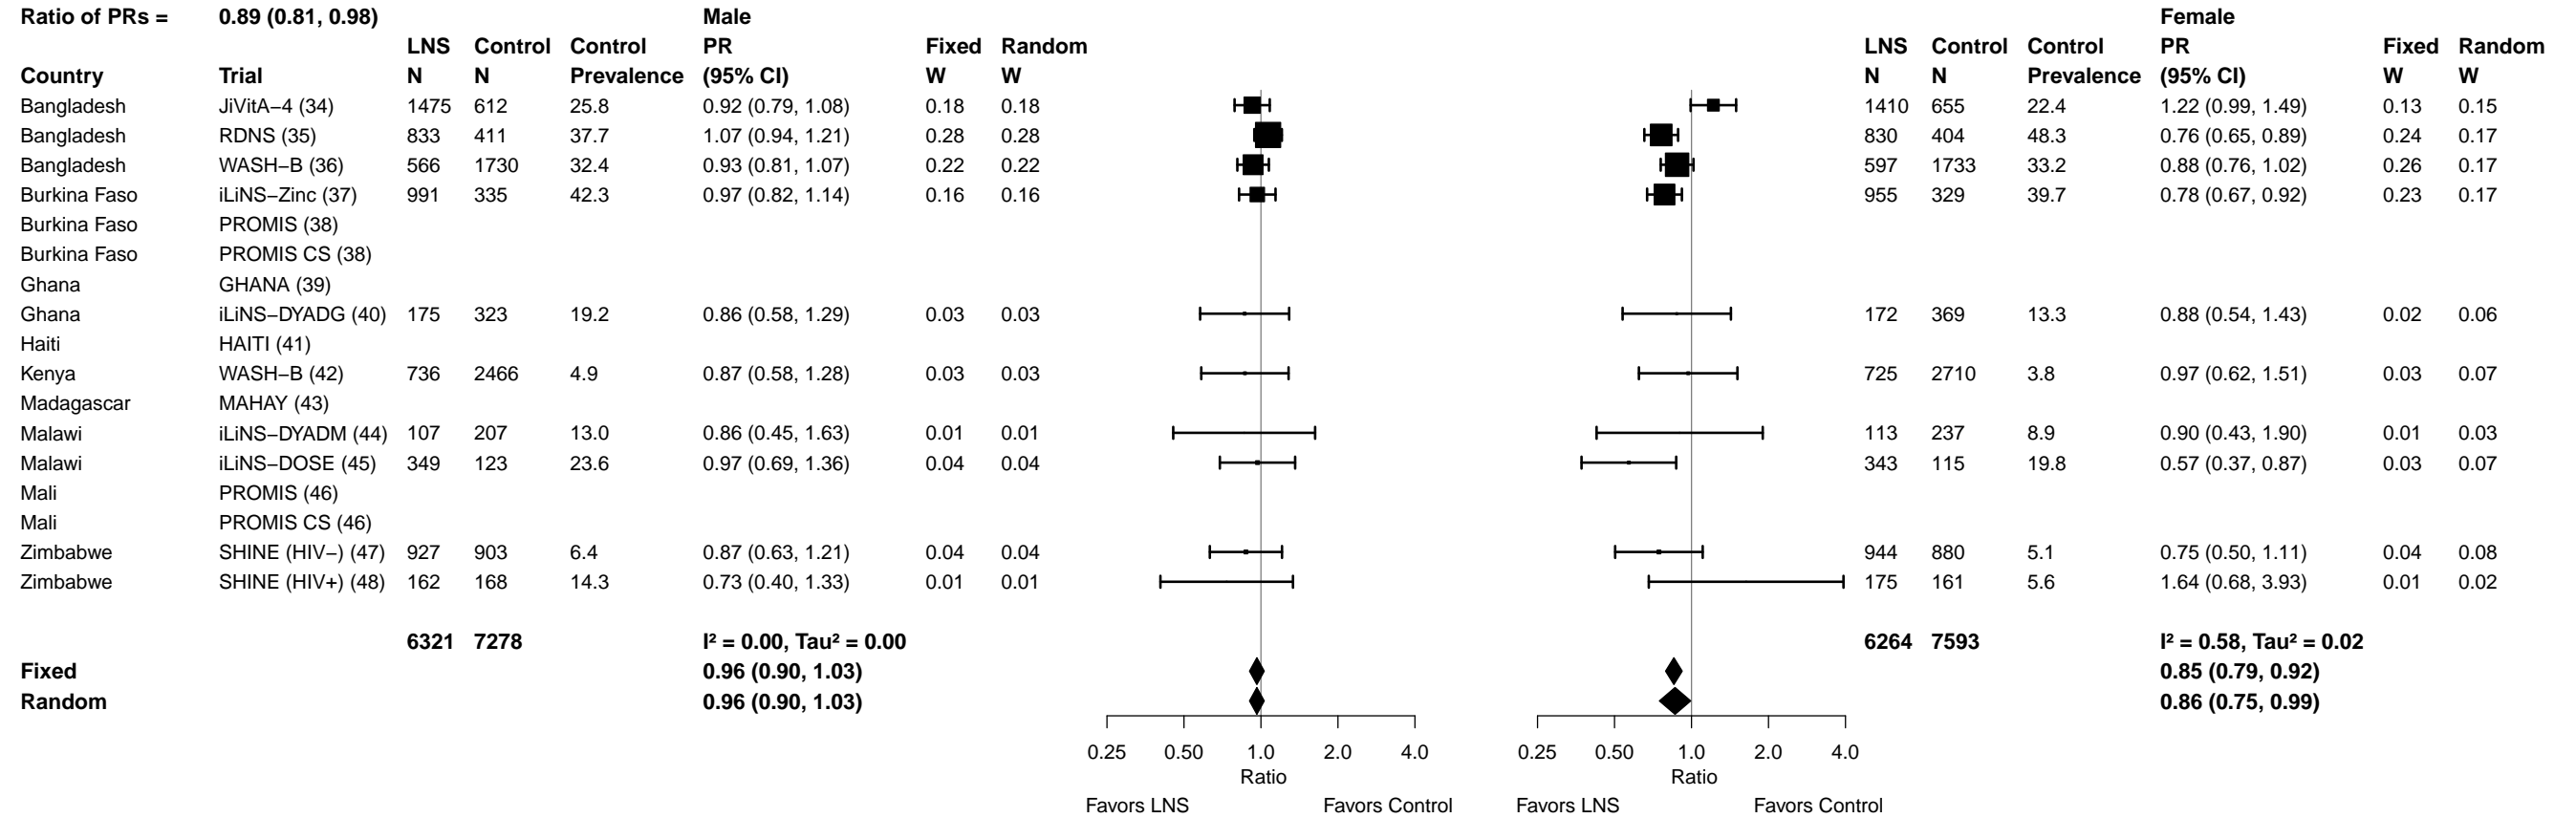

Supplemental figure 6P: Small head size prevalence ratio

6P7: Stratified by Child birth order

P-for-interaction = 0.696

Ratio of PRs = 1.02 (0.92, 1.14)

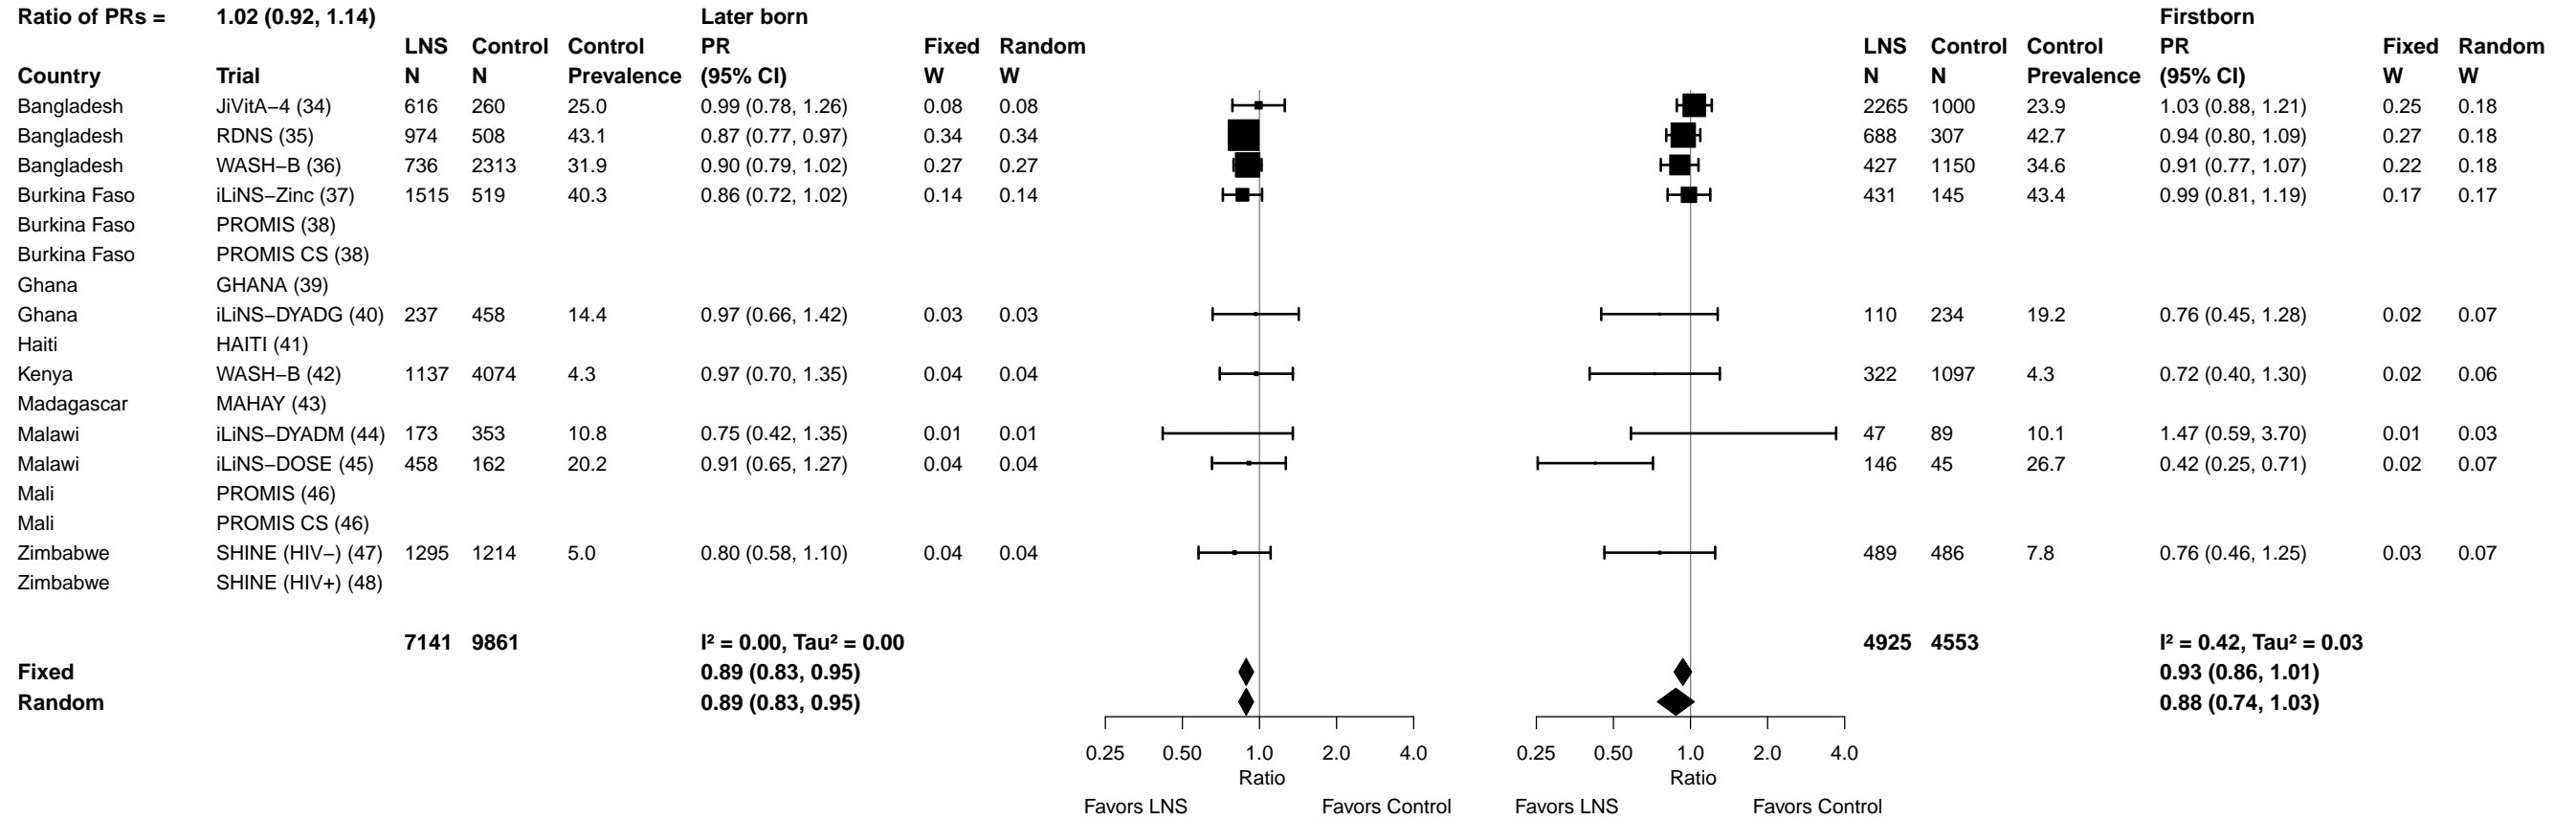

Supplemental figure 6P: Small head size prevalence ratio

6P8: Stratified by Child baseline anthropometric status

P-for-interaction = 0.152

Ratio of PRs = 1.25 (0.92, 1.70)

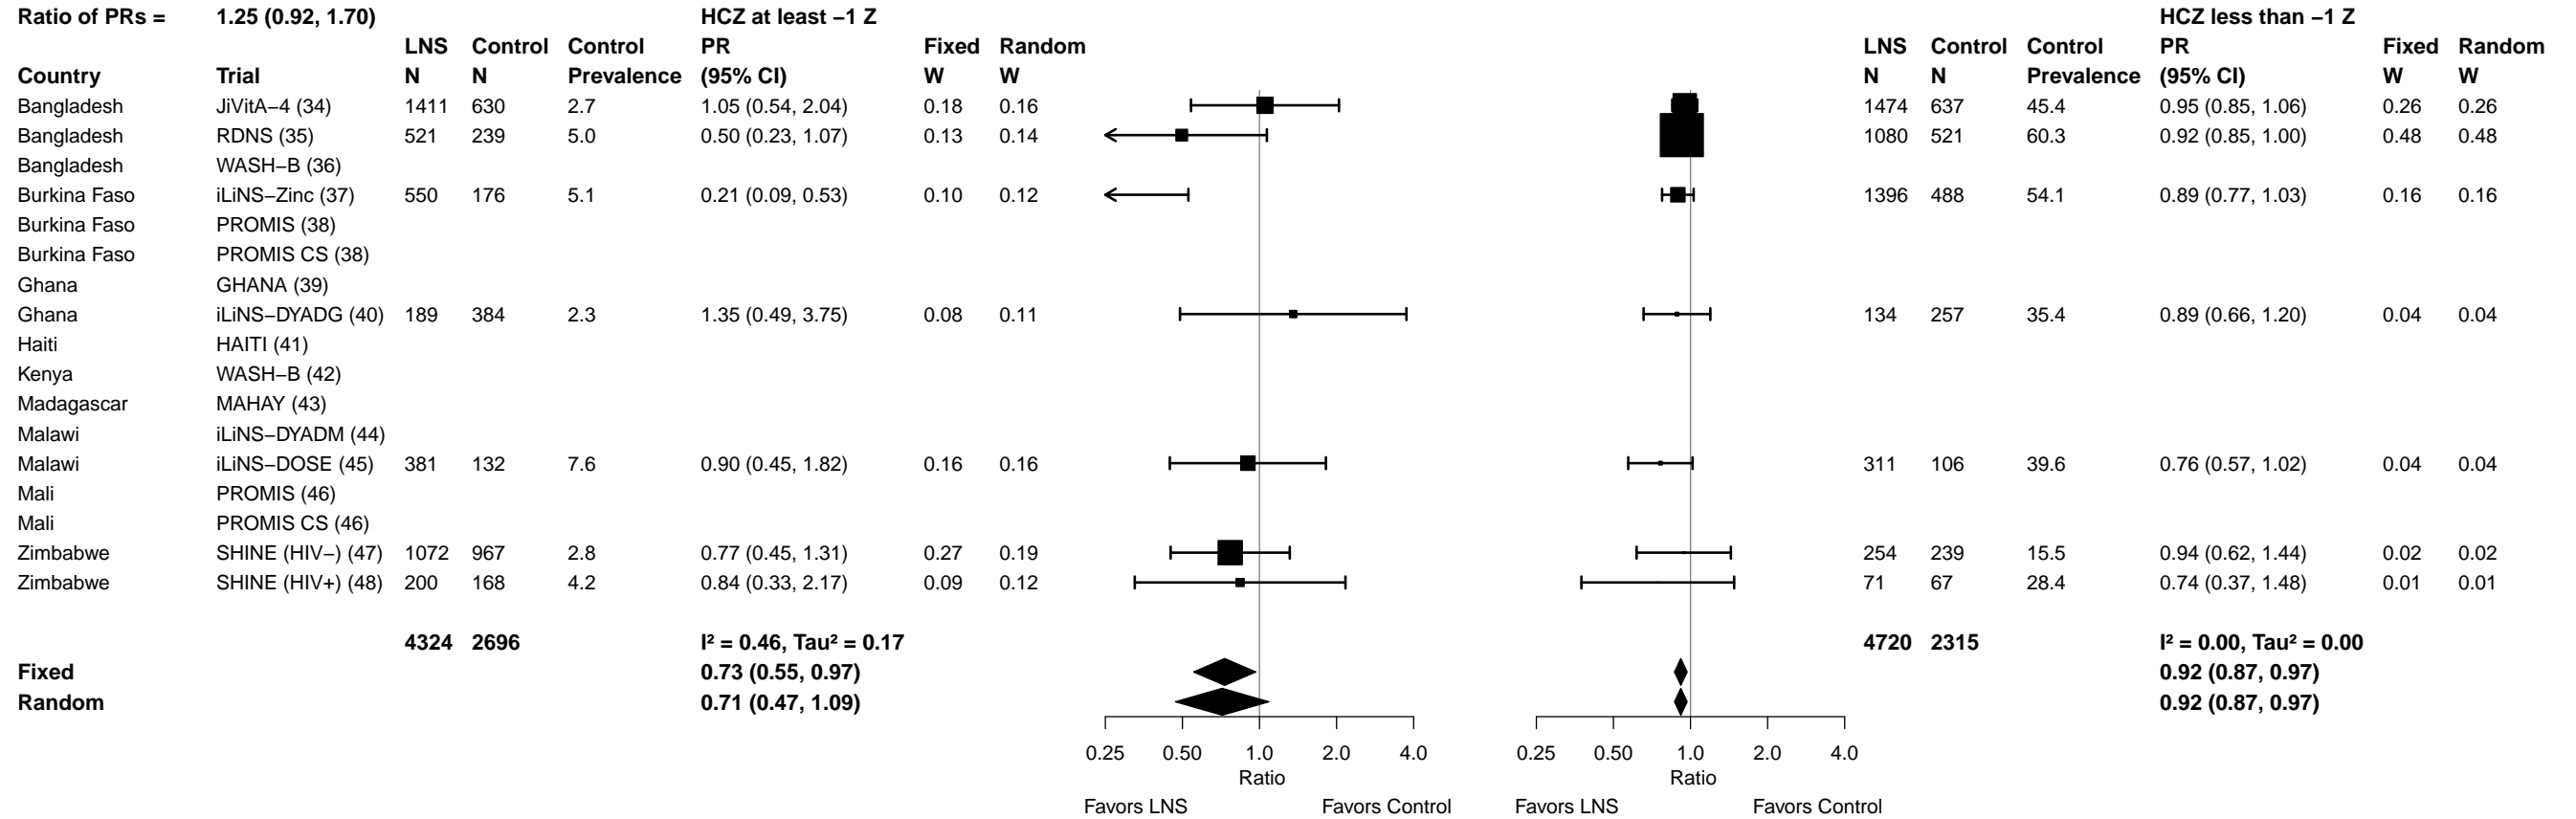

### Supplemental figure 6Q: Small head size prevalence difference

#### 6Q1: Stratified by Maternal height

P-for-interaction = 0.301

Difference in PDs = -0.02 (-0.06, 0.02)

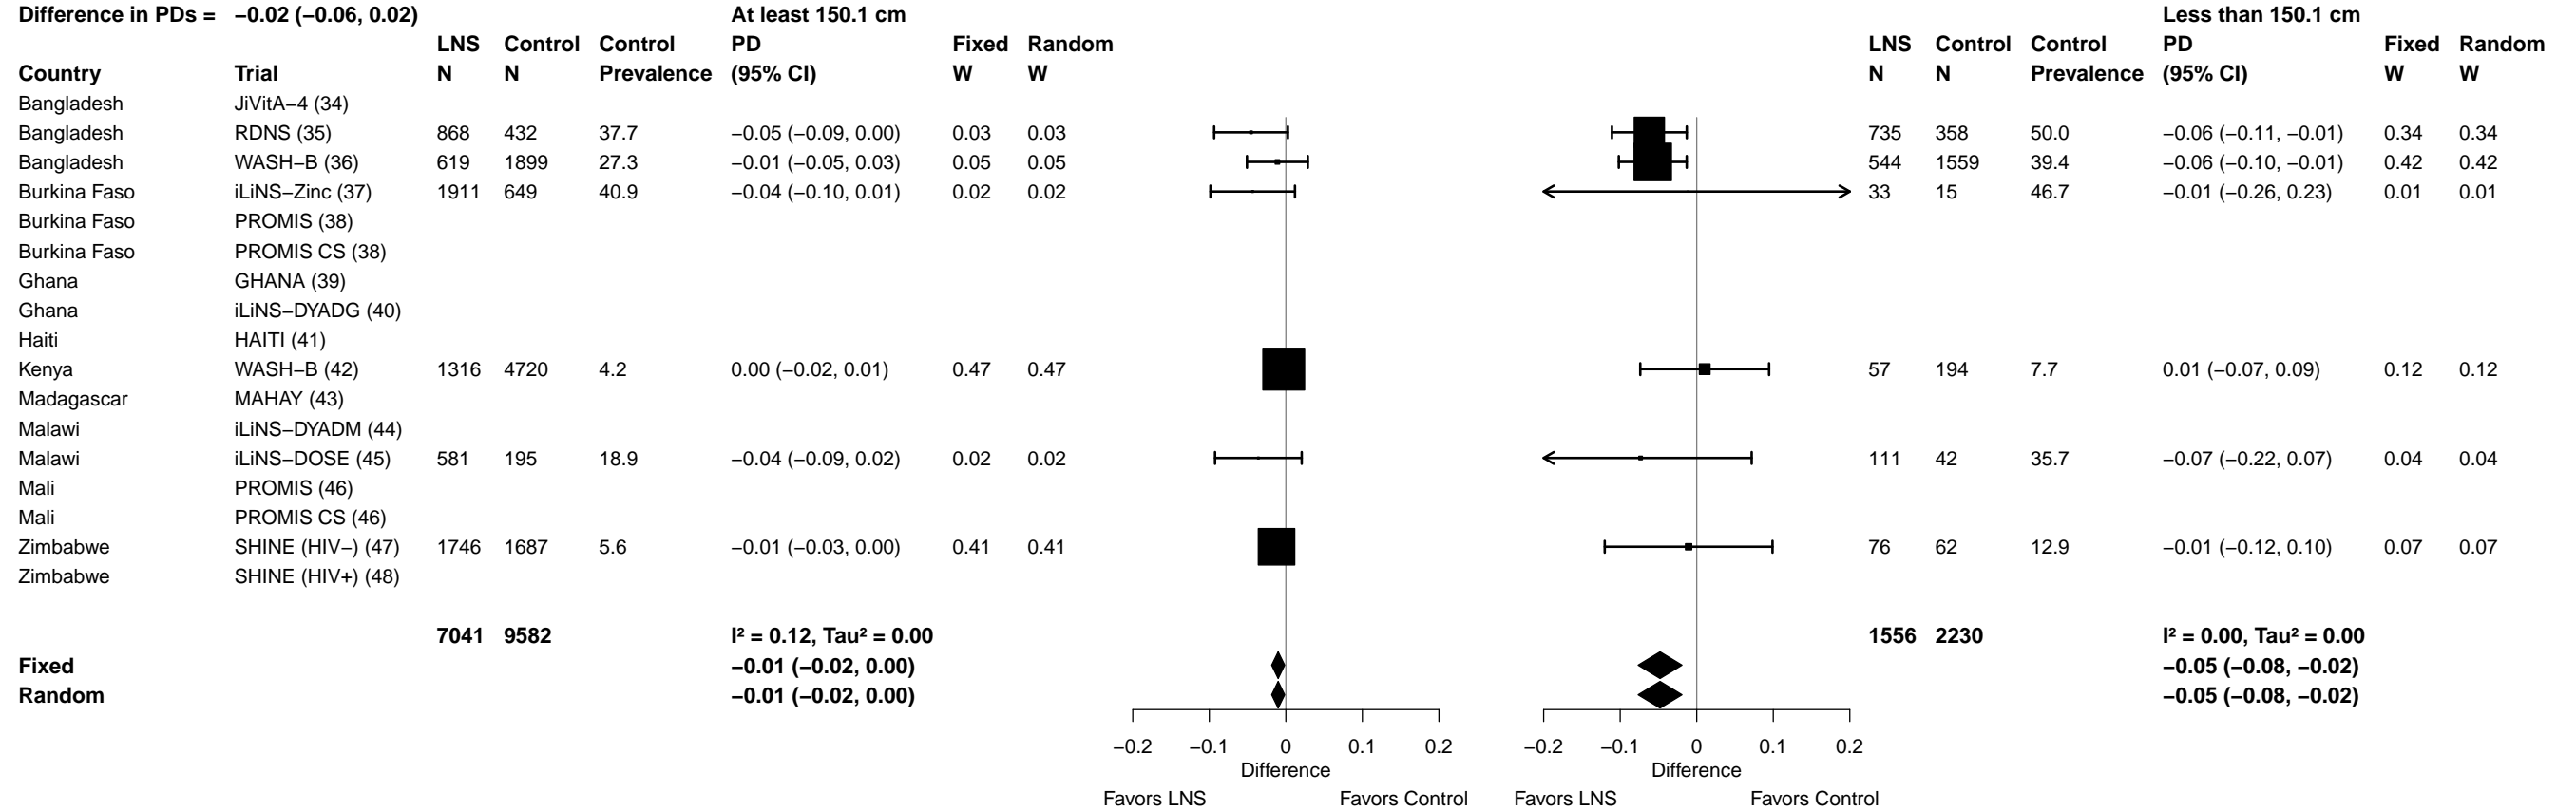

Supplemental figure 6Q: Small head size prevalence difference

6Q2: Stratified by Maternal BMI

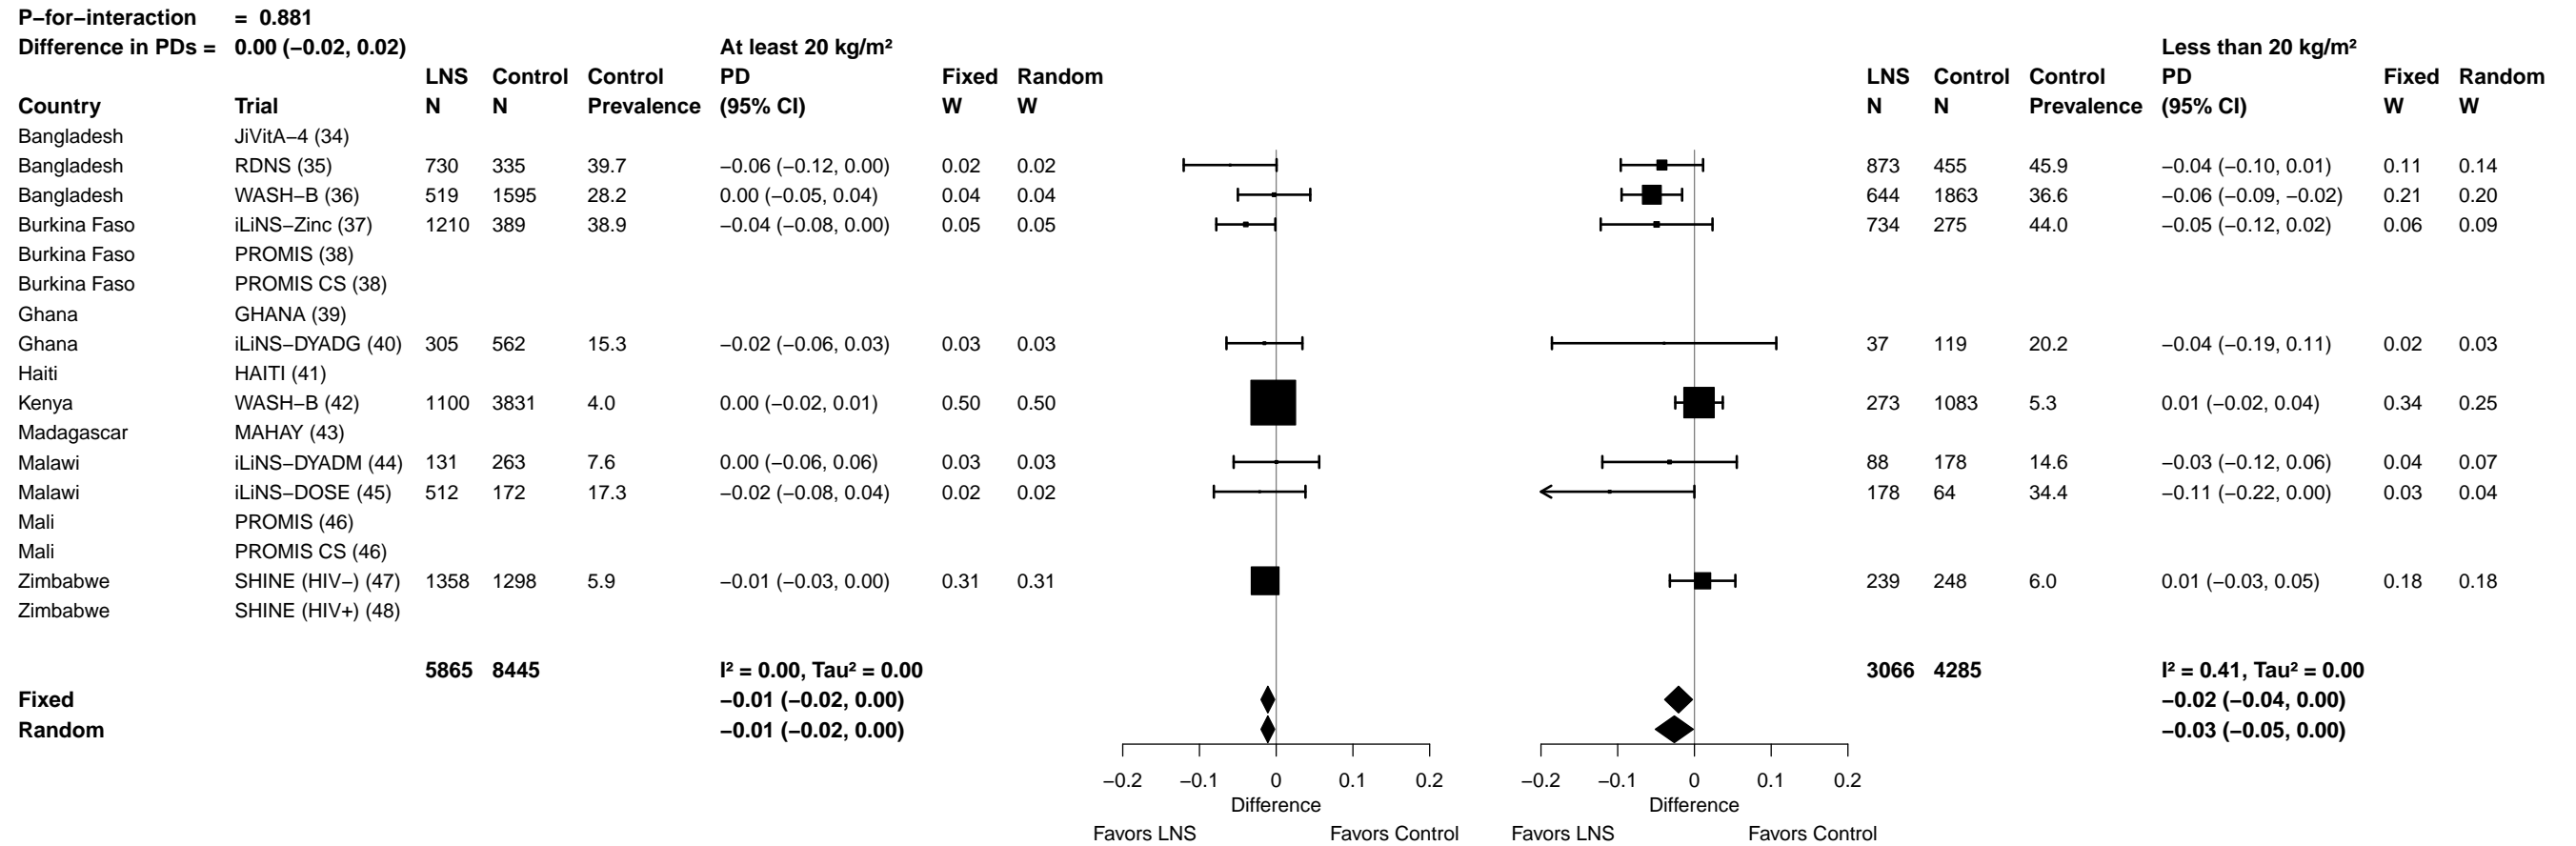

Supplemental figure 6Q: Small head size prevalence difference

6Q3: Stratified by Maternal age

P-for-interaction = 0.536

Difference in PDs = 0.00 (-0.02, 0.01)

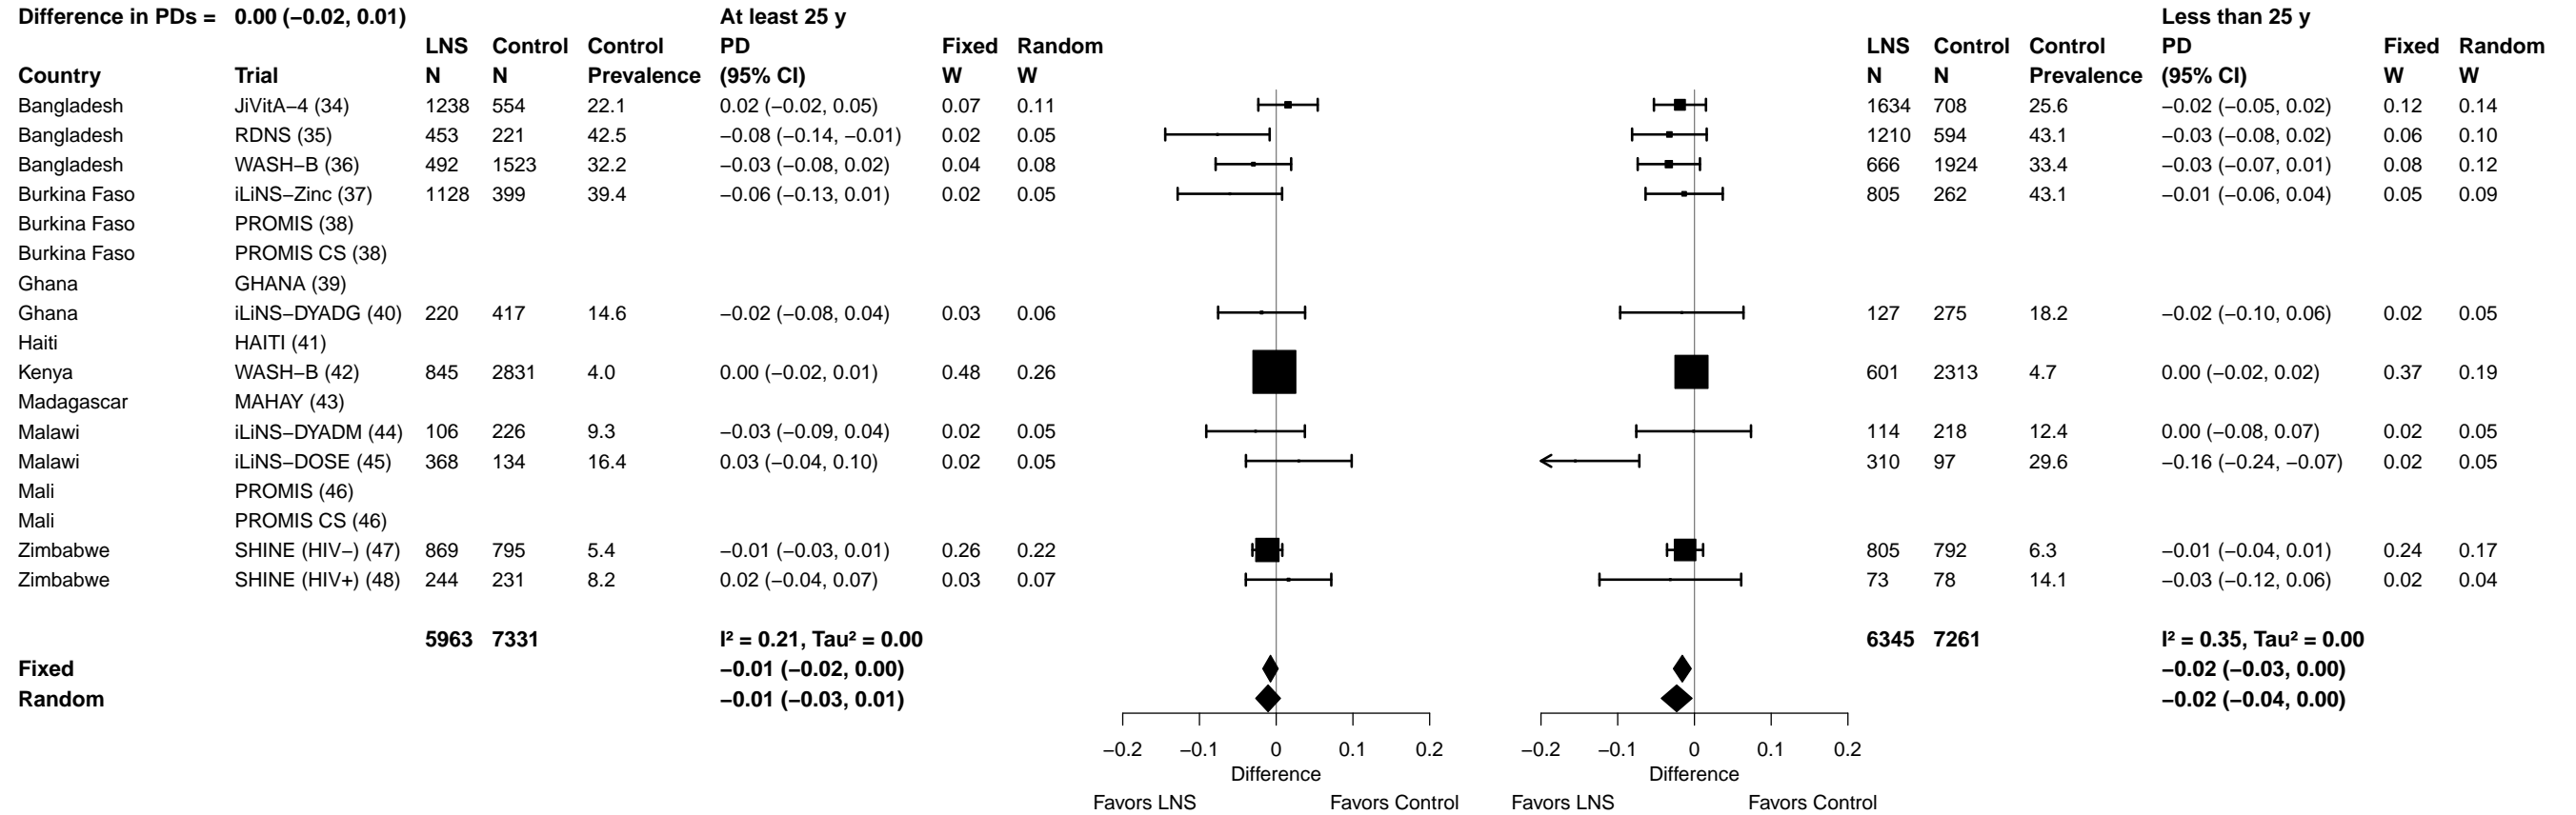

Supplemental figure 6Q: Small head size prevalence difference

6Q4: Stratified by Maternal education

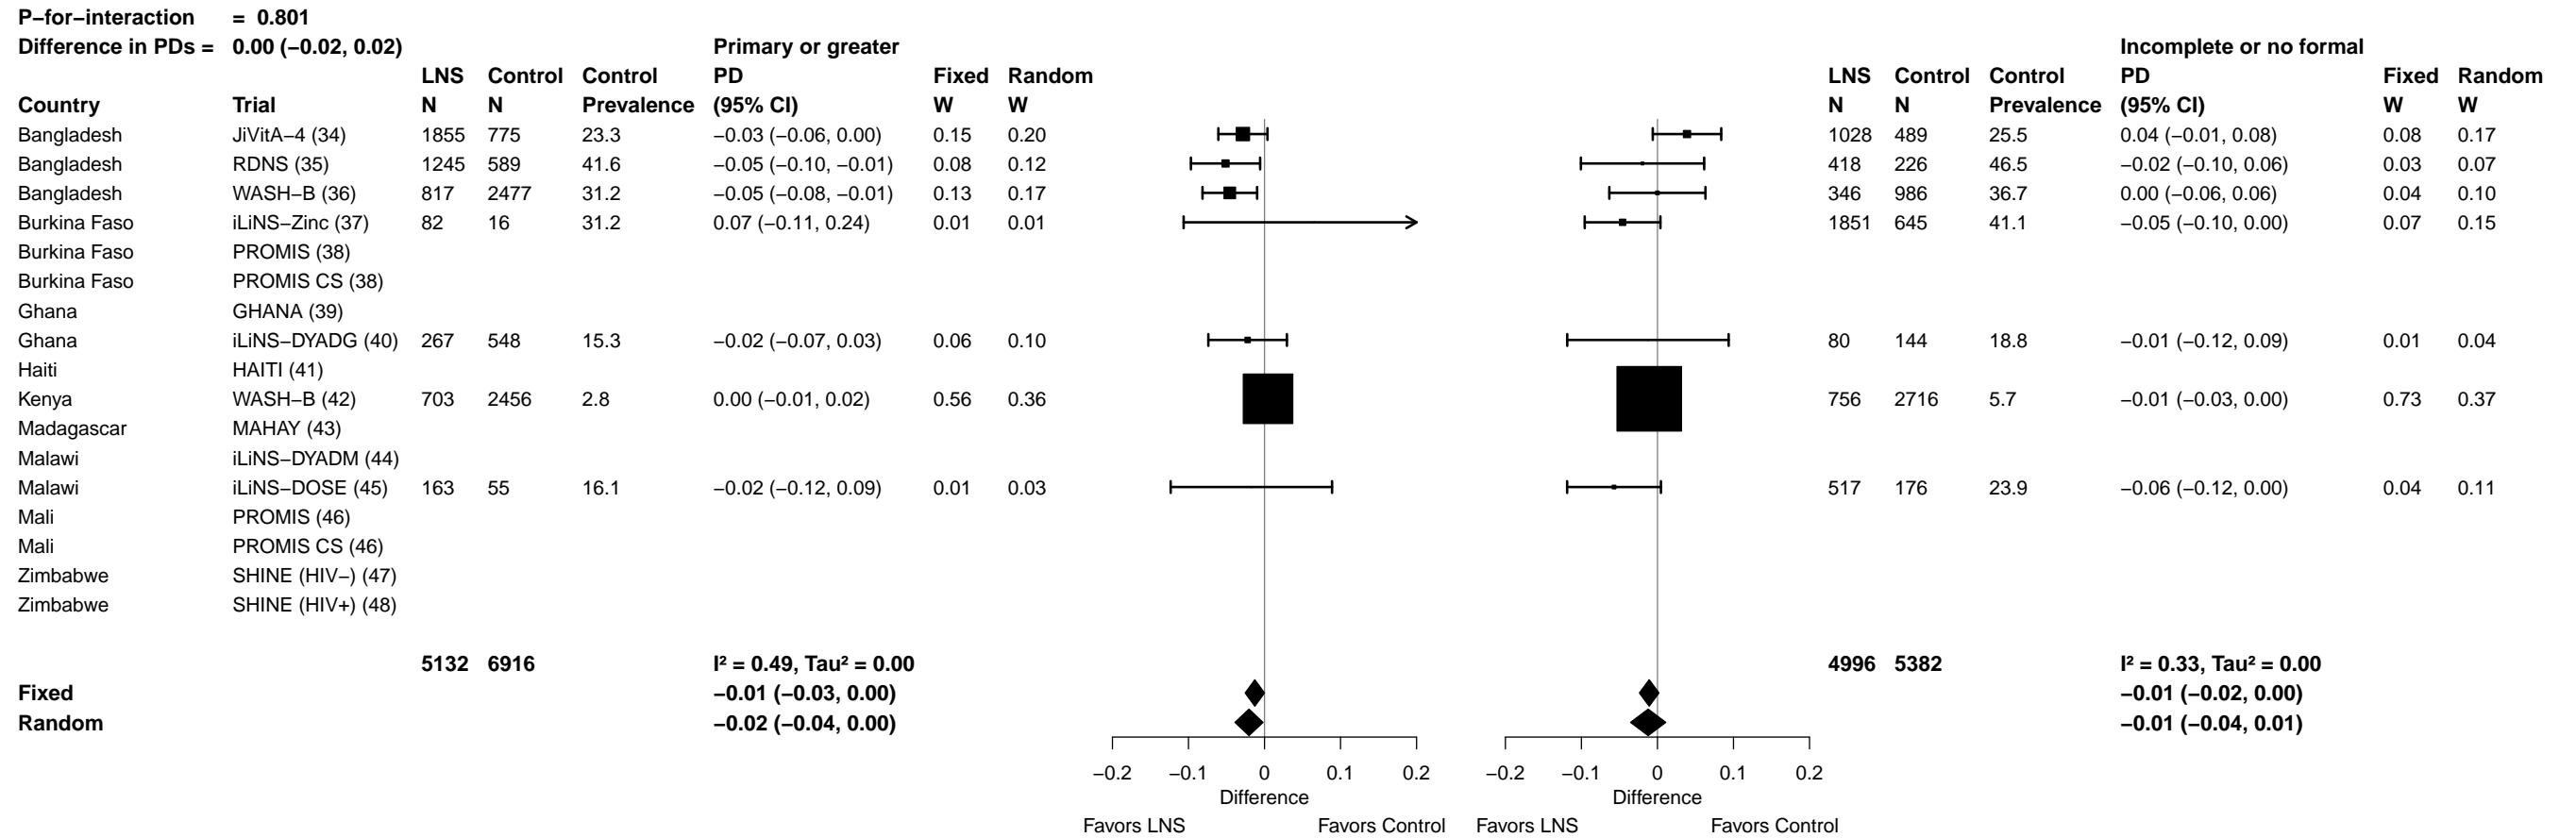

Supplemental figure 6Q: Small head size prevalence difference

6Q5: Stratified by Maternal depressive symptoms

$I^2$ -for-interaction = 0.134  
 Difference in PDs = 0.01 (0.00, 0.03)

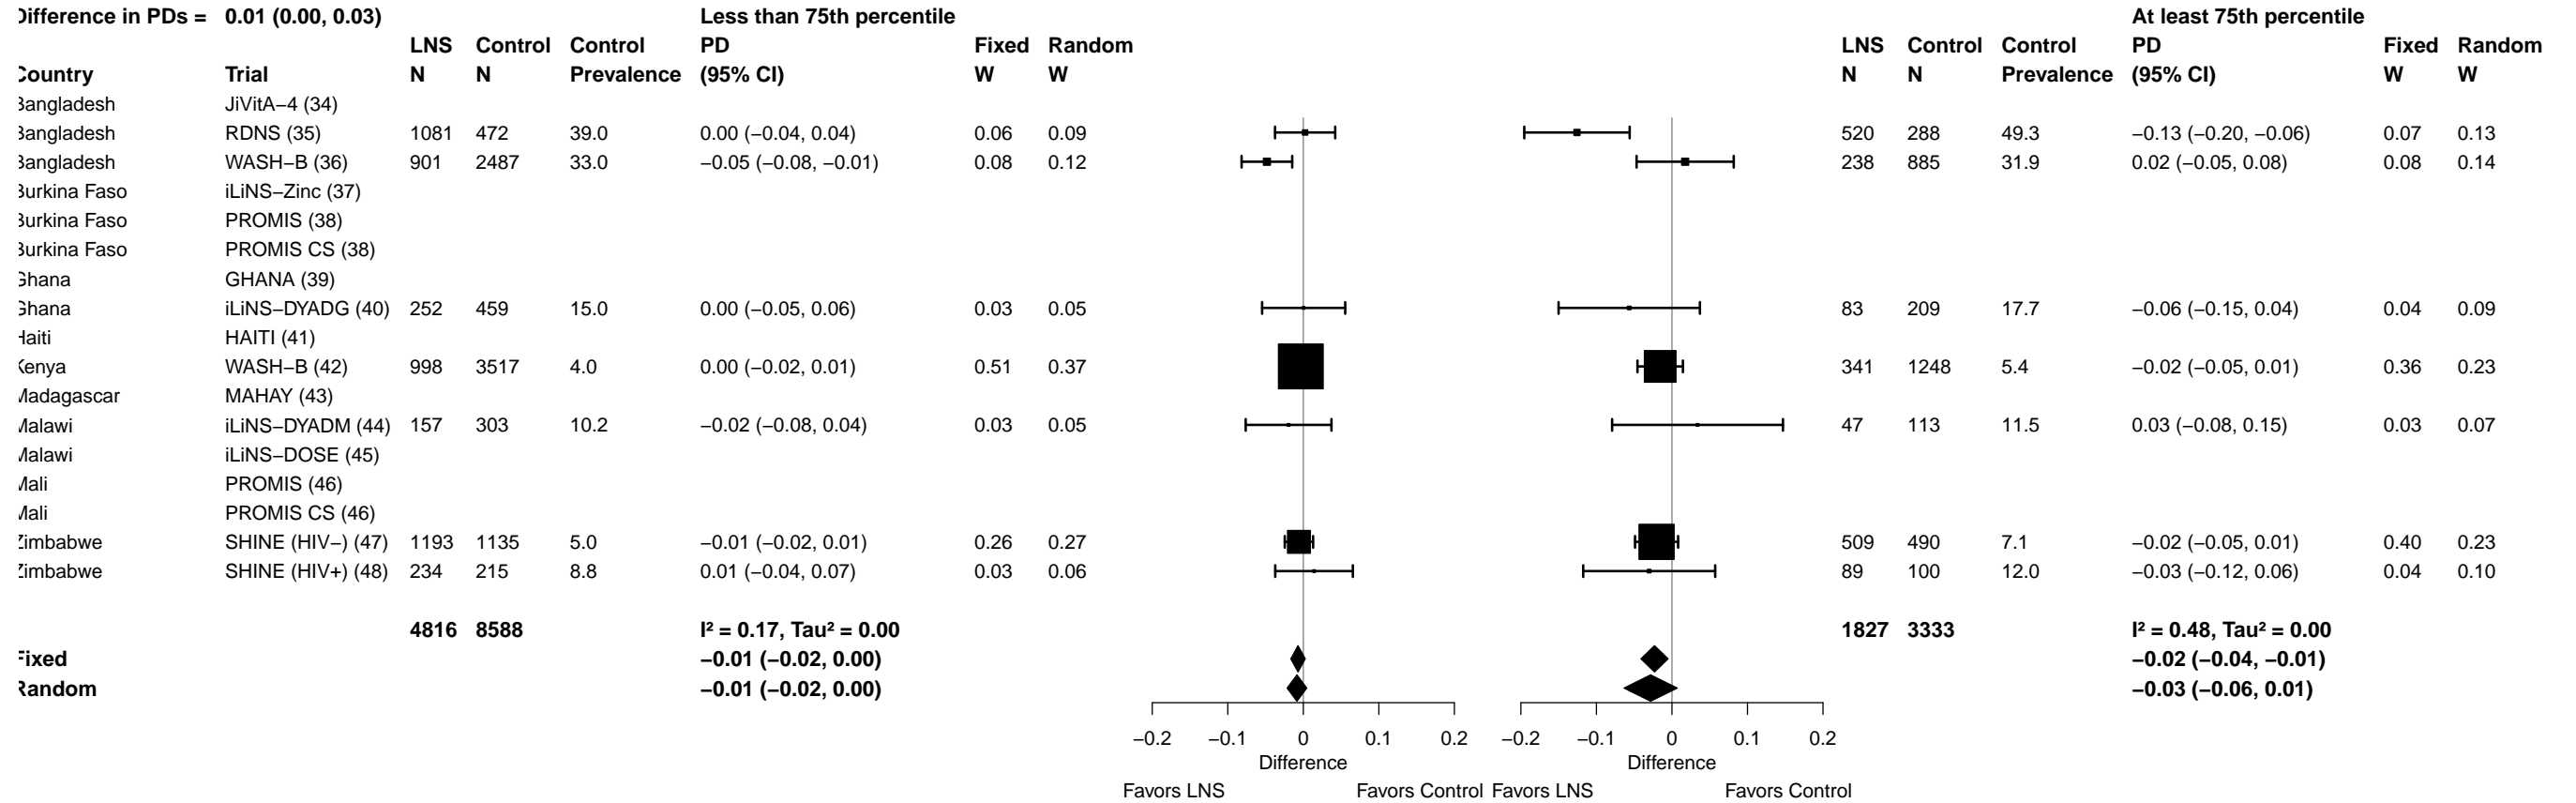



Supplemental figure 6Q: Small head size prevalence difference

6Q6: Stratified by Child sex

P-for-interaction = 0.624

Difference in PDs = 0.00 (-0.02, 0.01)

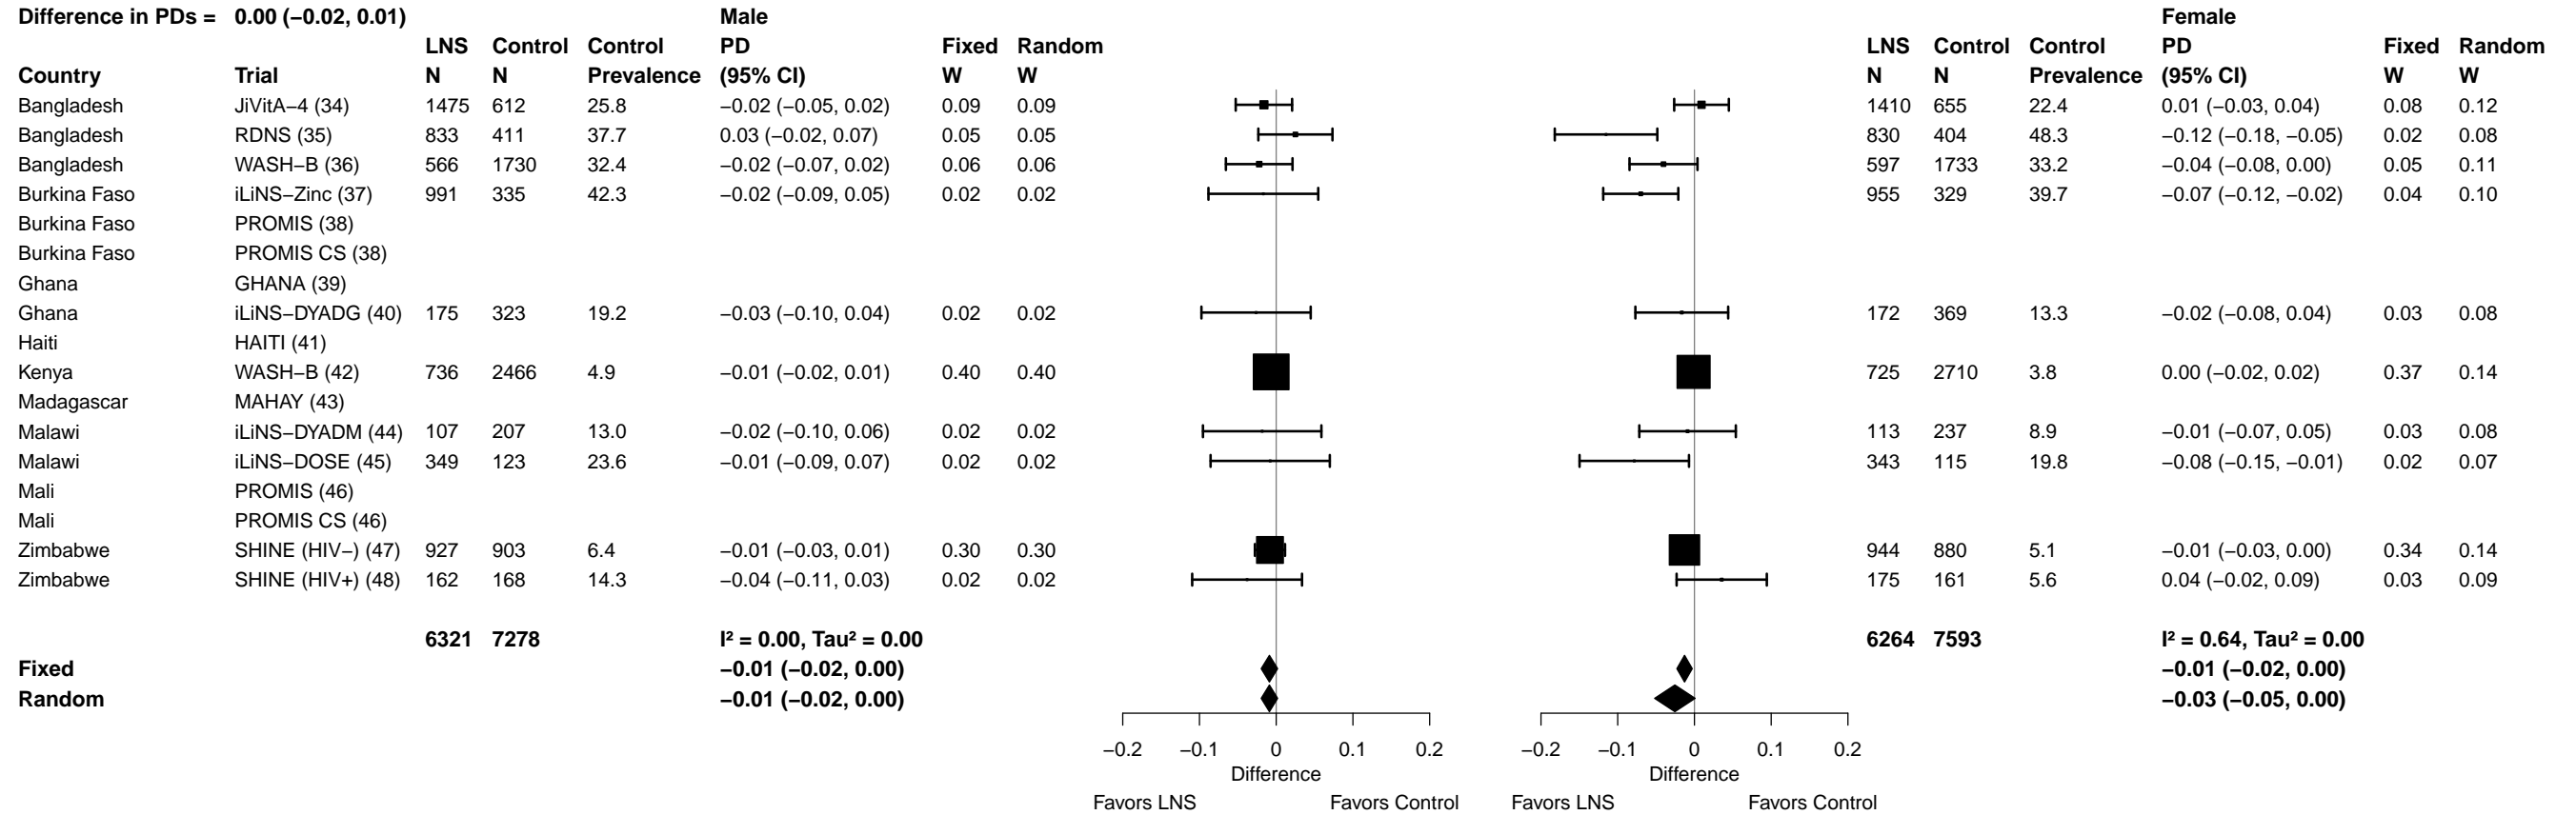

Supplemental figure 6Q: Small head size prevalence difference

6Q7: Stratified by Child birth order

P-for-interaction = 0.402

Difference in PDs = -0.01 (-0.02, 0.01)

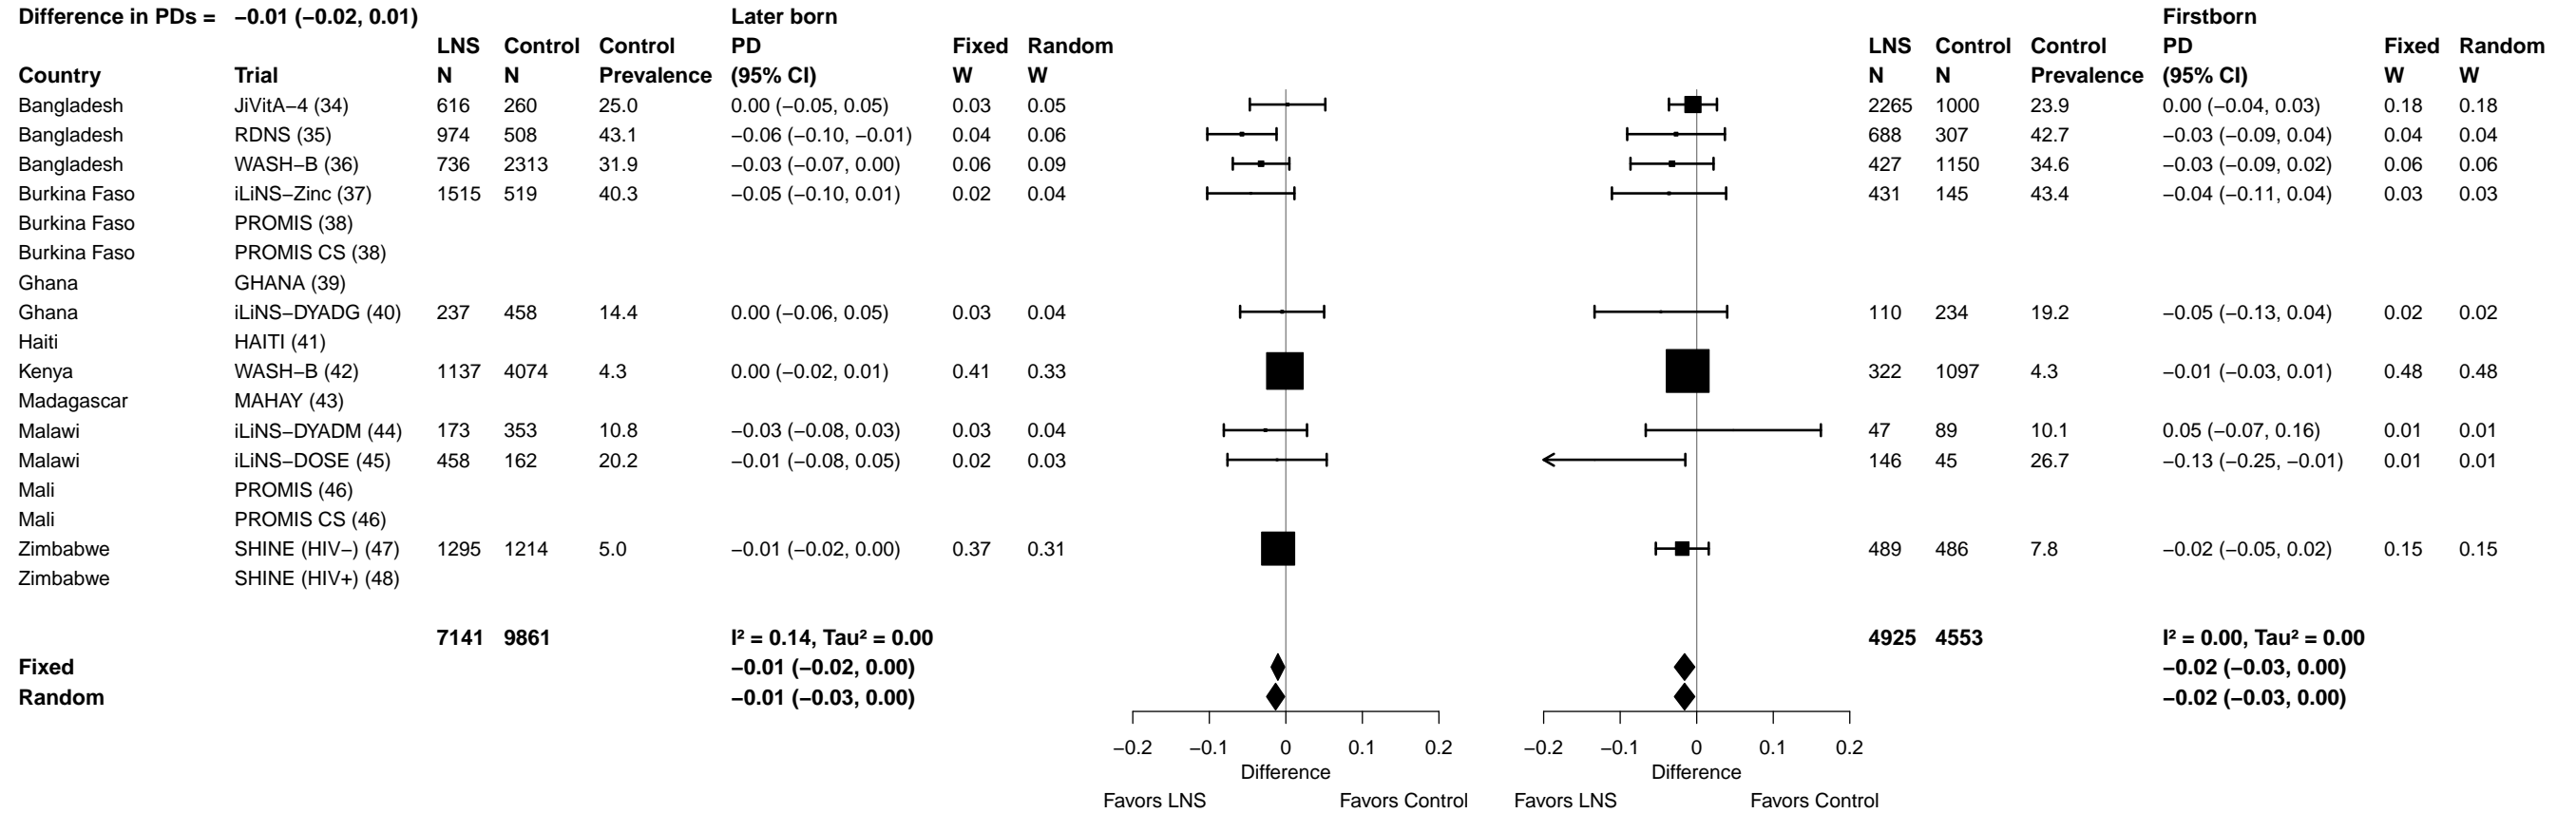

Supplemental figure 6Q: Small head size prevalence difference

6Q8: Stratified by Child baseline anthropometric status

P-for-interaction = 0.069

Difference in PDs = -0.02 (-0.05, 0.00)

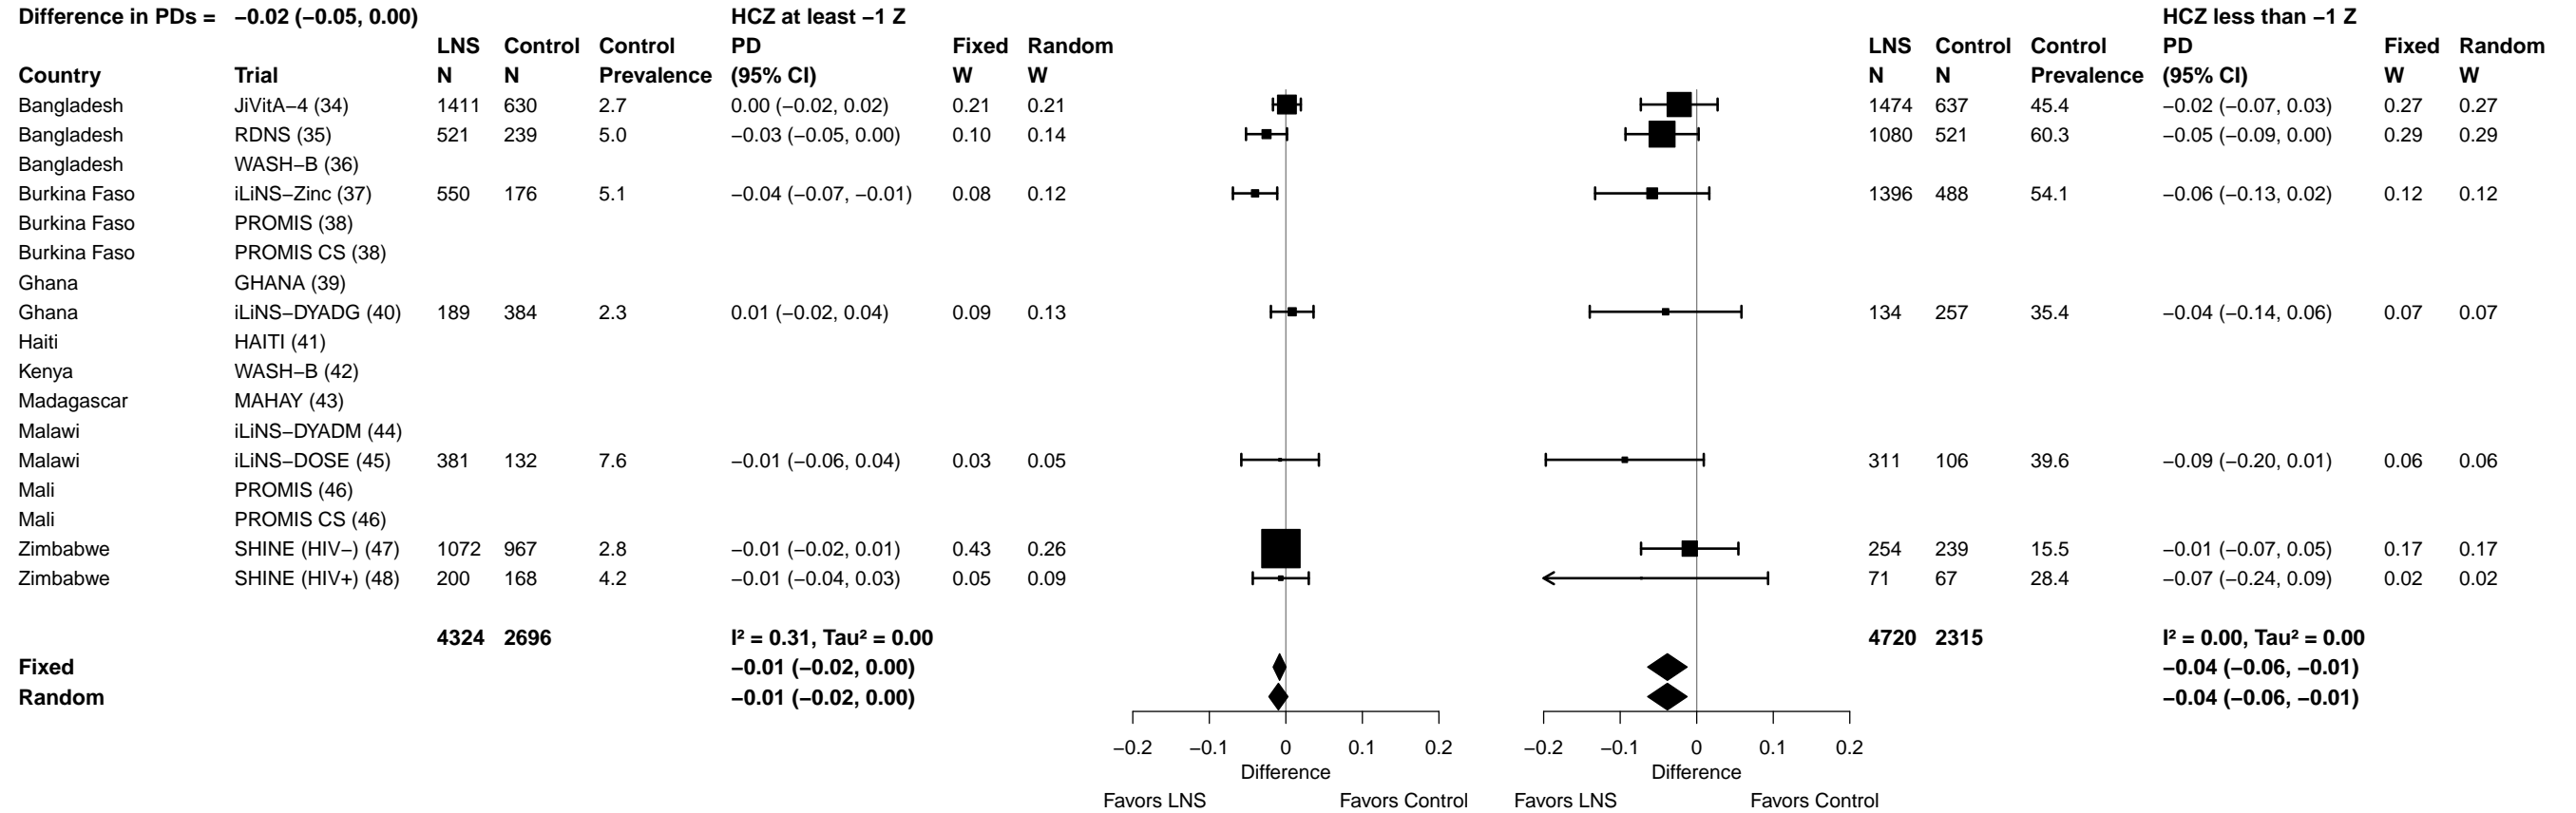

## Supplemental figure 7: Forest plots for effects of SQ-LNS on growth outcomes stratified by individual-level household effect modifiers

### Contents

|                                                                   |               |
|-------------------------------------------------------------------|---------------|
| <b>Supplemental figure 7A: Mean difference in LAZ</b>             | <b>4</b>      |
| 7A1: Stratified by Household socio-economic status . . . . .      | 4             |
| 7A2: Stratified by Household food insecurity . . . . .            | 5             |
| 7A3: Stratified by Household source water quality . . . . .       | 6             |
| 7A4: Stratified by Household sanitation . . . . .                 | 7             |
| 7A5: Stratified by Home environment . . . . .                     | 8             |
| 7A6: Stratified by Season at the time of assessment . . . . .     | 9             |
| <br><b>Supplemental figure 7B: Stunting prevalence ratio</b>      | <br><b>10</b> |
| 7B1: Stratified by Household socio-economic status . . . . .      | 10            |
| 7B2: Stratified by Household food insecurity . . . . .            | 11            |
| 7B3: Stratified by Household source water quality . . . . .       | 12            |
| 7B4: Stratified by Household sanitation . . . . .                 | 13            |
| 7B5: Stratified by Home environment . . . . .                     | 14            |
| 7B6: Stratified by Season at the time of assessment . . . . .     | 15            |
| <br><b>Supplemental figure 7C: Stunting prevalence difference</b> | <br><b>16</b> |
| 7C1: Stratified by Household socio-economic status . . . . .      | 16            |
| 7C2: Stratified by Household food insecurity . . . . .            | 17            |
| 7C3: Stratified by Household source water quality . . . . .       | 18            |
| 7C4: Stratified by Household sanitation . . . . .                 | 19            |
| 7C5: Stratified by Home environment . . . . .                     | 20            |
| 7C6: Stratified by Season at the time of assessment . . . . .     | 21            |
| <br><b>Supplemental figure 7D: Mean difference in WLZ</b>         | <br><b>22</b> |
| 7D1: Stratified by Household socio-economic status . . . . .      | 22            |
| 7D2: Stratified by Household food insecurity . . . . .            | 23            |
| 7D3: Stratified by Household source water quality . . . . .       | 24            |
| 7D4: Stratified by Household sanitation . . . . .                 | 25            |
| 7D5: Stratified by Home environment . . . . .                     | 26            |
| 7D6: Stratified by Season at the time of assessment . . . . .     | 27            |
| <br><b>Supplemental figure 7E: Wasting prevalence ratio</b>       | <br><b>28</b> |
| 7E1: Stratified by Household socio-economic status . . . . .      | 28            |
| 7E2: Stratified by Household food insecurity . . . . .            | 29            |
| 7E3: Stratified by Household source water quality . . . . .       | 30            |
| 7E4: Stratified by Household sanitation . . . . .                 | 31            |
| 7E5: Stratified by Home environment . . . . .                     | 32            |
| 7E6: Stratified by Season at the time of assessment . . . . .     | 33            |
| <br><b>Supplemental figure 7F: Wasting prevalence difference</b>  | <br><b>34</b> |

|                                                                         |           |
|-------------------------------------------------------------------------|-----------|
| 7F1: Stratified by Household socio-economic status . . . . .            | 34        |
| 7F2: Stratified by Household food insecurity . . . . .                  | 35        |
| 7F3: Stratified by Household source water quality . . . . .             | 36        |
| 7F4: Stratified by Household sanitation . . . . .                       | 37        |
| 7F5: Stratified by Home environment . . . . .                           | 38        |
| 7F6: Stratified by Season at the time of assessment . . . . .           | 39        |
| <b>Supplemental figure 7G: Mean difference in MUACZ</b>                 | <b>40</b> |
| 7G1: Stratified by Household socio-economic status . . . . .            | 40        |
| 7G2: Stratified by Household food insecurity . . . . .                  | 41        |
| 7G3: Stratified by Household source water quality . . . . .             | 42        |
| 7G4: Stratified by Household sanitation . . . . .                       | 43        |
| 7G5: Stratified by Home environment . . . . .                           | 44        |
| 7G6: Stratified by Season at the time of assessment . . . . .           | 45        |
| <b>Supplemental figure 7H: Low MUAC prevalence ratio</b>                | <b>46</b> |
| 7H1: Stratified by Household socio-economic status . . . . .            | 46        |
| 7H2: Stratified by Household food insecurity . . . . .                  | 47        |
| 7H3: Stratified by Household source water quality . . . . .             | 48        |
| 7H4: Stratified by Household sanitation . . . . .                       | 49        |
| 7H5: Stratified by Home environment . . . . .                           | 50        |
| 7H6: Stratified by Season at the time of assessment . . . . .           | 51        |
| <b>Supplemental figure 7I: Low MUAC prevalence difference</b>           | <b>52</b> |
| 7I1: Stratified by Household socio-economic status . . . . .            | 52        |
| 7I2: Stratified by Household food insecurity . . . . .                  | 53        |
| 7I3: Stratified by Household source water quality . . . . .             | 54        |
| 7I4: Stratified by Household sanitation . . . . .                       | 55        |
| 7I5: Stratified by Home environment . . . . .                           | 56        |
| 7I6: Stratified by Season at the time of assessment . . . . .           | 57        |
| <b>Supplemental figure 7J: Acute malnutrition prevalence ratio</b>      | <b>58</b> |
| 7J1: Stratified by Household socio-economic status . . . . .            | 58        |
| 7J2: Stratified by Household food insecurity . . . . .                  | 59        |
| 7J3: Stratified by Household source water quality . . . . .             | 60        |
| 7J4: Stratified by Household sanitation . . . . .                       | 61        |
| 7J5: Stratified by Home environment . . . . .                           | 62        |
| 7J6: Stratified by Season at the time of assessment . . . . .           | 63        |
| <b>Supplemental figure 7K: Acute malnutrition prevalence difference</b> | <b>64</b> |
| 7K1: Stratified by Household socio-economic status . . . . .            | 64        |
| 7K2: Stratified by Household food insecurity . . . . .                  | 65        |
| 7K3: Stratified by Household source water quality . . . . .             | 66        |
| 7K4: Stratified by Household sanitation . . . . .                       | 67        |
| 7K5: Stratified by Home environment . . . . .                           | 68        |
| 7K6: Stratified by Season at the time of assessment . . . . .           | 69        |
| <b>Supplemental figure 7L: Mean difference in WAZ</b>                   | <b>70</b> |
| 7L1: Stratified by Household socio-economic status . . . . .            | 70        |
| 7L2: Stratified by Household food insecurity . . . . .                  | 71        |
| 7L3: Stratified by Household source water quality . . . . .             | 72        |

|                                                                      |            |
|----------------------------------------------------------------------|------------|
| 7L4: Stratified by Household sanitation . . . . .                    | 73         |
| 7L5: Stratified by Home environment . . . . .                        | 74         |
| 7L6: Stratified by Season at the time of assessment . . . . .        | 75         |
| <b>Supplemental figure 7M: Underweight prevalence ratio</b>          | <b>76</b>  |
| 7M1: Stratified by Household socio-economic status . . . . .         | 76         |
| 7M2: Stratified by Household food insecurity . . . . .               | 77         |
| 7M3: Stratified by Household source water quality . . . . .          | 78         |
| 7M4: Stratified by Household sanitation . . . . .                    | 79         |
| 7M5: Stratified by Home environment . . . . .                        | 80         |
| 7M6: Stratified by Season at the time of assessment . . . . .        | 81         |
| <b>Supplemental figure 7N: Underweight prevalence difference</b>     | <b>82</b>  |
| 7N1: Stratified by Household socio-economic status . . . . .         | 82         |
| 7N2: Stratified by Household food insecurity . . . . .               | 83         |
| 7N3: Stratified by Household source water quality . . . . .          | 84         |
| 7N4: Stratified by Household sanitation . . . . .                    | 85         |
| 7N5: Stratified by Home environment . . . . .                        | 86         |
| 7N6: Stratified by Season at the time of assessment . . . . .        | 87         |
| <b>Supplemental figure 7O: Mean difference in HCZ</b>                | <b>88</b>  |
| 7O1: Stratified by Household socio-economic status . . . . .         | 88         |
| 7O2: Stratified by Household food insecurity . . . . .               | 89         |
| 7O3: Stratified by Household source water quality . . . . .          | 90         |
| 7O4: Stratified by Household sanitation . . . . .                    | 91         |
| 7O5: Stratified by Home environment . . . . .                        | 92         |
| 7O6: Stratified by Season at the time of assessment . . . . .        | 93         |
| <b>Supplemental figure 7P: Small head size prevalence ratio</b>      | <b>94</b>  |
| 7P1: Stratified by Household socio-economic status . . . . .         | 94         |
| 7P2: Stratified by Household food insecurity . . . . .               | 95         |
| 7P3: Stratified by Household source water quality . . . . .          | 96         |
| 7P4: Stratified by Household sanitation . . . . .                    | 97         |
| 7P5: Stratified by Home environment . . . . .                        | 98         |
| 7P6: Stratified by Season at the time of assessment . . . . .        | 99         |
| <b>Supplemental figure 7Q: Small head size prevalence difference</b> | <b>100</b> |
| 7Q1: Stratified by Household socio-economic status . . . . .         | 100        |
| 7Q2: Stratified by Household food insecurity . . . . .               | 101        |
| 7Q3: Stratified by Household source water quality . . . . .          | 102        |
| 7Q4: Stratified by Household sanitation . . . . .                    | 103        |
| 7Q5: Stratified by Home environment . . . . .                        | 104        |
| 7Q6: Stratified by Season at the time of assessment . . . . .        | 105        |

These figures are forest plots showing the individual-level effect modification of intervention effects. Each figure has the estimates of intervention effect stratified within study by individual-level effect modifier category. For continuous outcomes analyzed via mean differences, the effect estimate is the mean in the LNS group minus the mean in the control group. For dichotomous outcomes analyzed via prevalence ratios, the effect estimate is the prevalence in the LNS group divided by the prevalence in the control group. For dichotomous outcomes analyzed via prevalence differences, the effect estimate is the prevalence in the LNS group minus the prevalence in the control group. The labels on the far left correspond to trial level information. In the middle left and on the right the values indicate the study level effect estimate, confidence interval, and weighting for deriving the pooled estimates is shown by subgroup. LAZ, length-for-age z-score; WLZ, weight-for-length z-score; WAZ, weight-for-age z-score; MUACZ, mid-upper arm circumference z-score; HCZ, head circumference-for-age z-score.

### Supplemental figure 7A: Mean difference in LAZ

#### 7A1: Stratified by Household socio-economic status

P-for-interaction = 0.805  
 Difference in MDs = 0.01 (-0.03, 0.04)

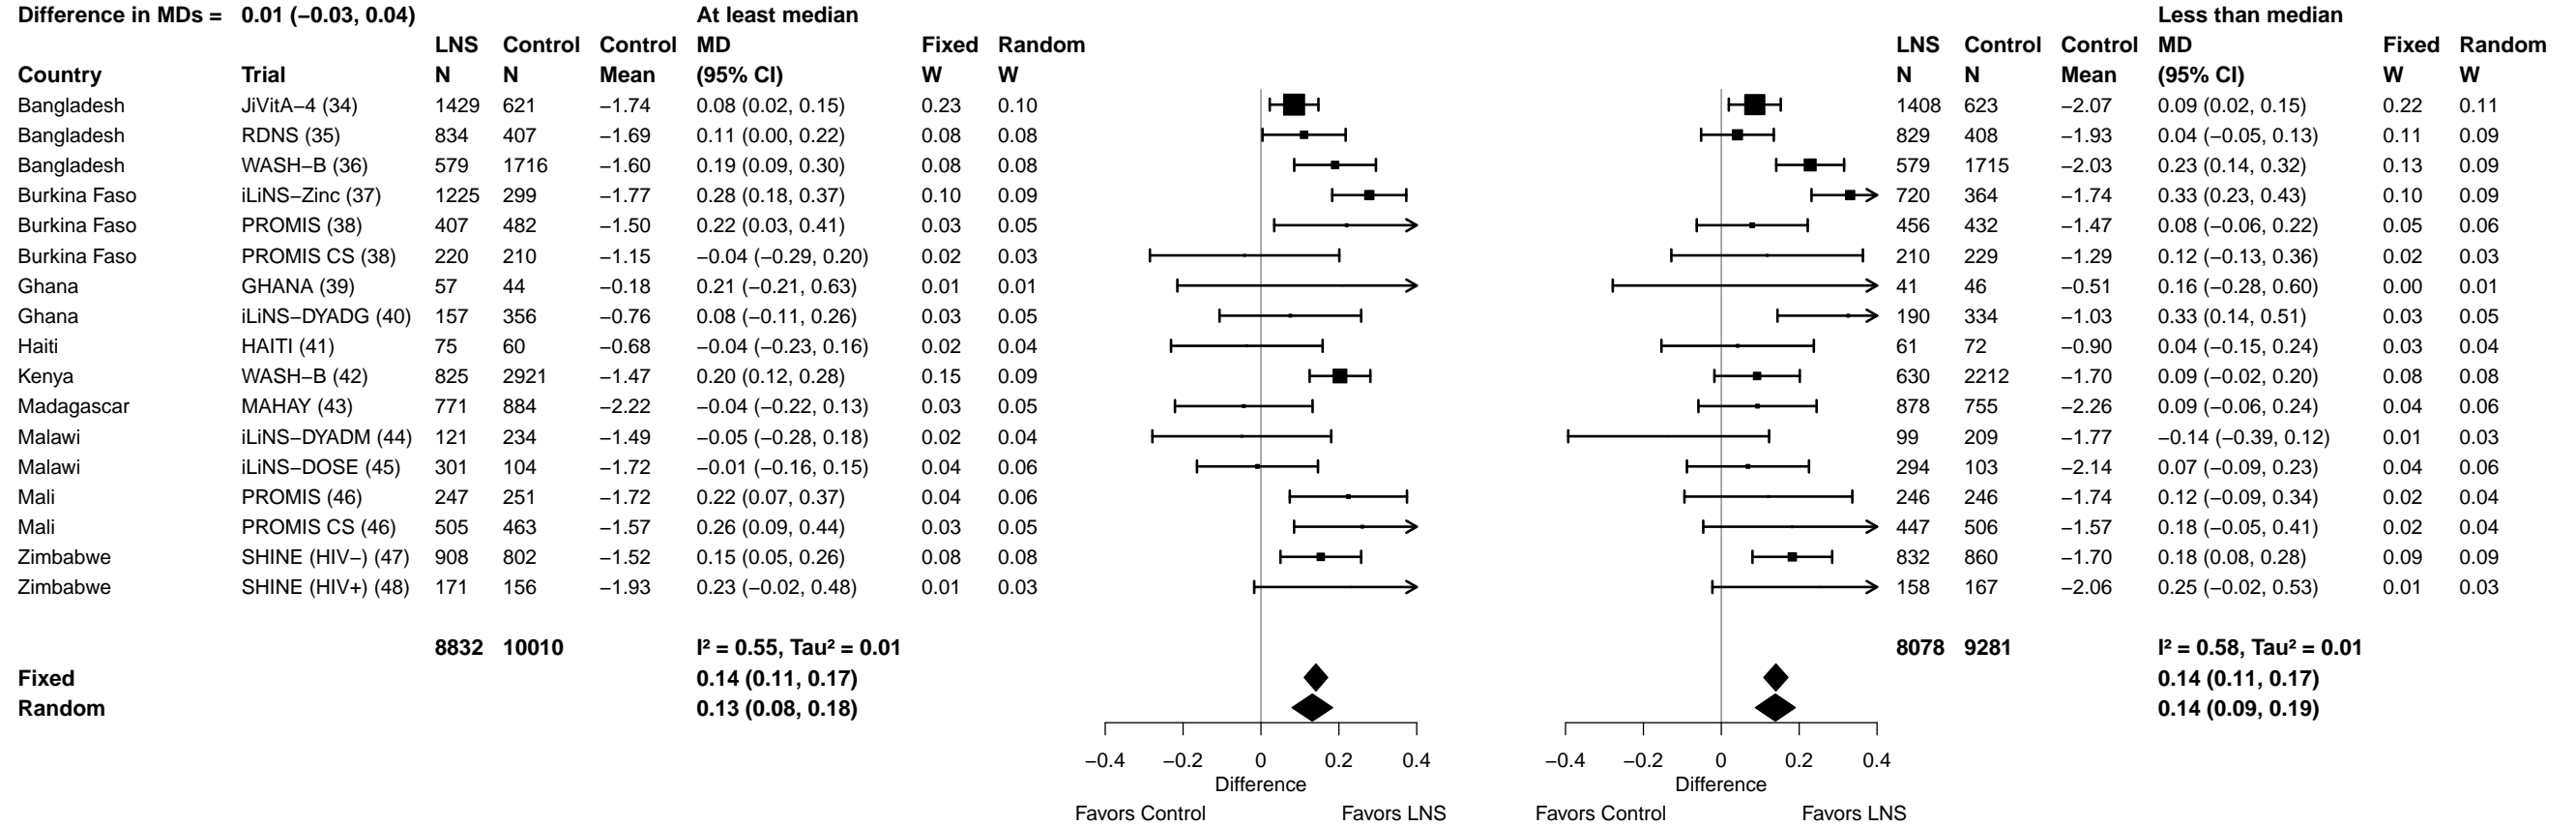

Supplemental figure 7A: Mean difference in LAZ

7A2: Stratified by Household food insecurity

P-for-interaction = 0.943

Difference in MDs = 0.00 (-0.04, 0.05)

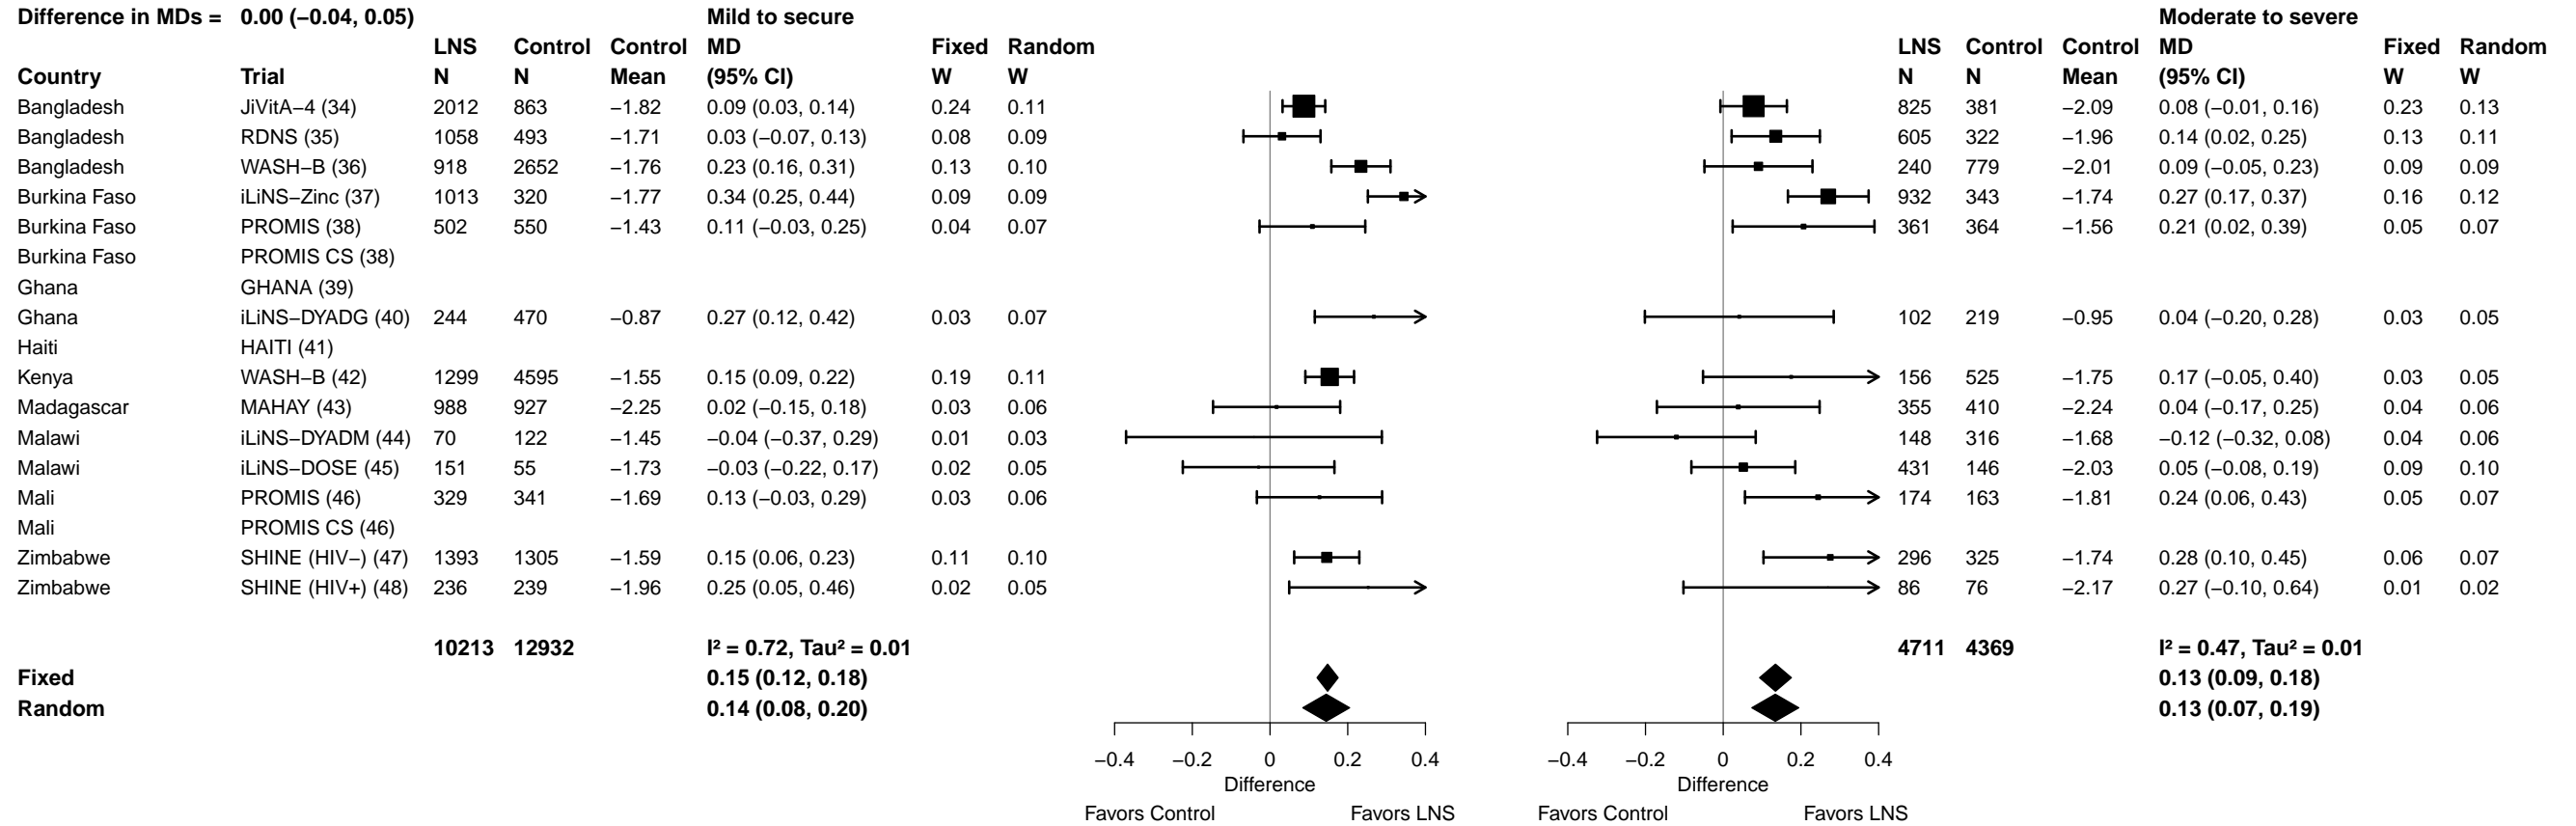





Supplemental figure 7A: Mean difference in LAZ

7A4: Stratified by Household sanitation

P-for-interaction = 0.135

Difference in MDs = -0.04 (-0.10, 0.01)

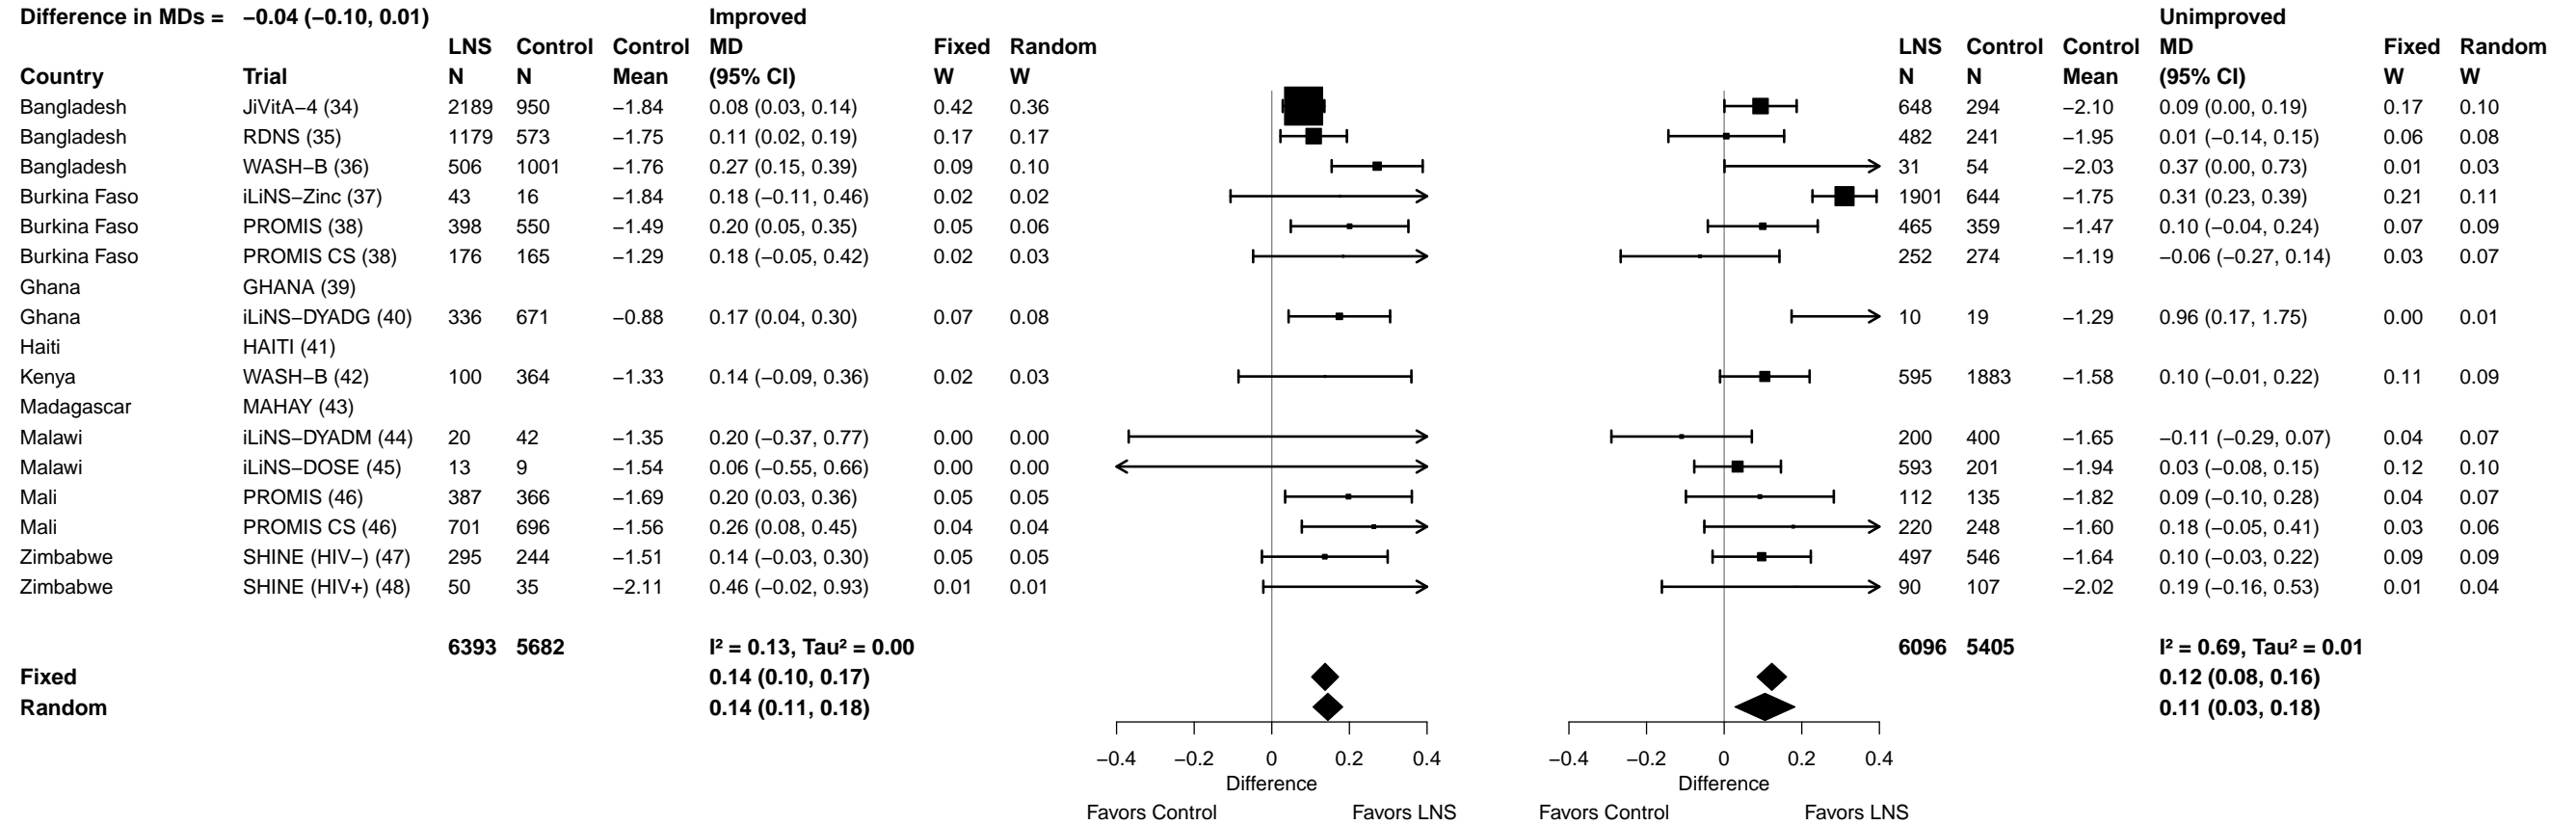

Supplemental figure 7A: Mean difference in LAZ

7A5: Stratified by Home environment

P-for-interaction = 0.394

Difference in MDs = 0.03 (-0.04, 0.09)

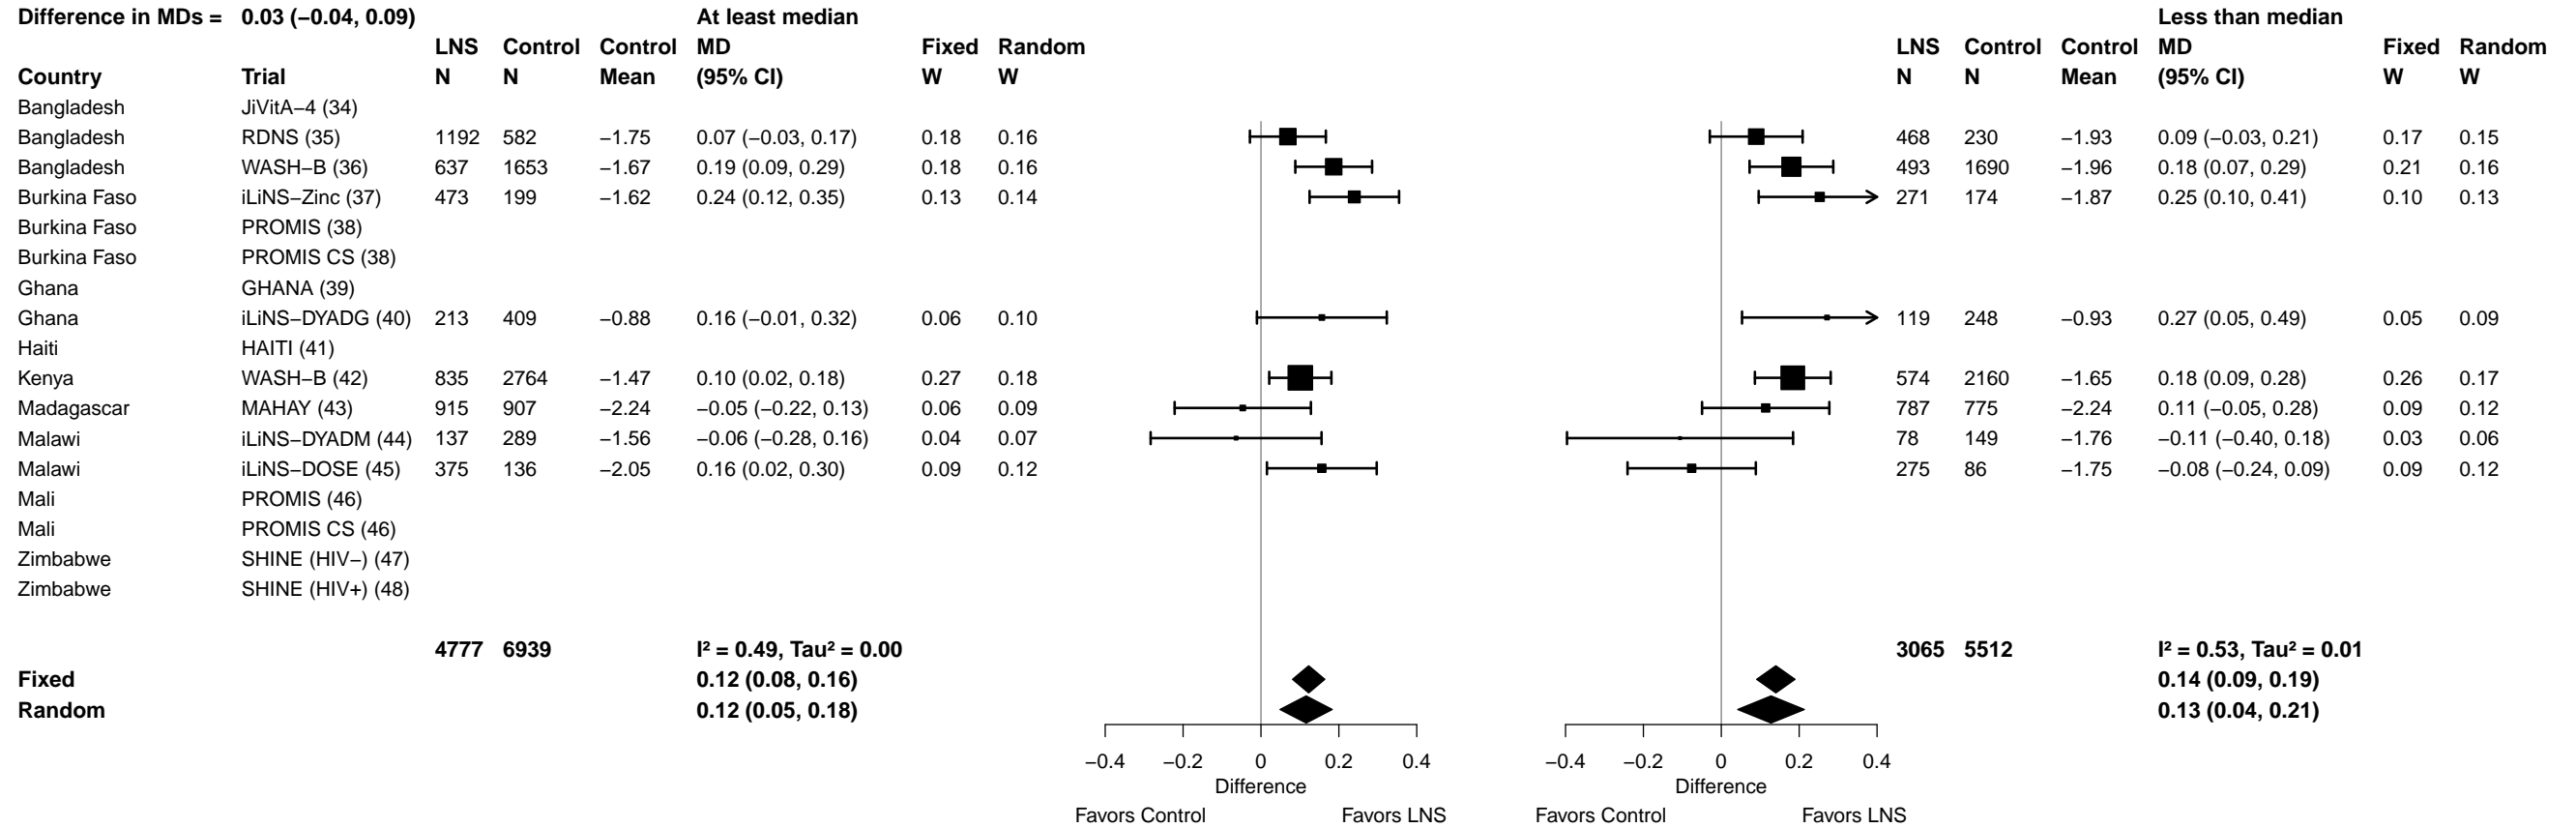

Supplemental figure 7A: Mean difference in LAZ

7A6: Stratified by Season at the time of assessment

P-for-interaction = 0.834

Difference in MDs = 0.00 (-0.04, 0.05)

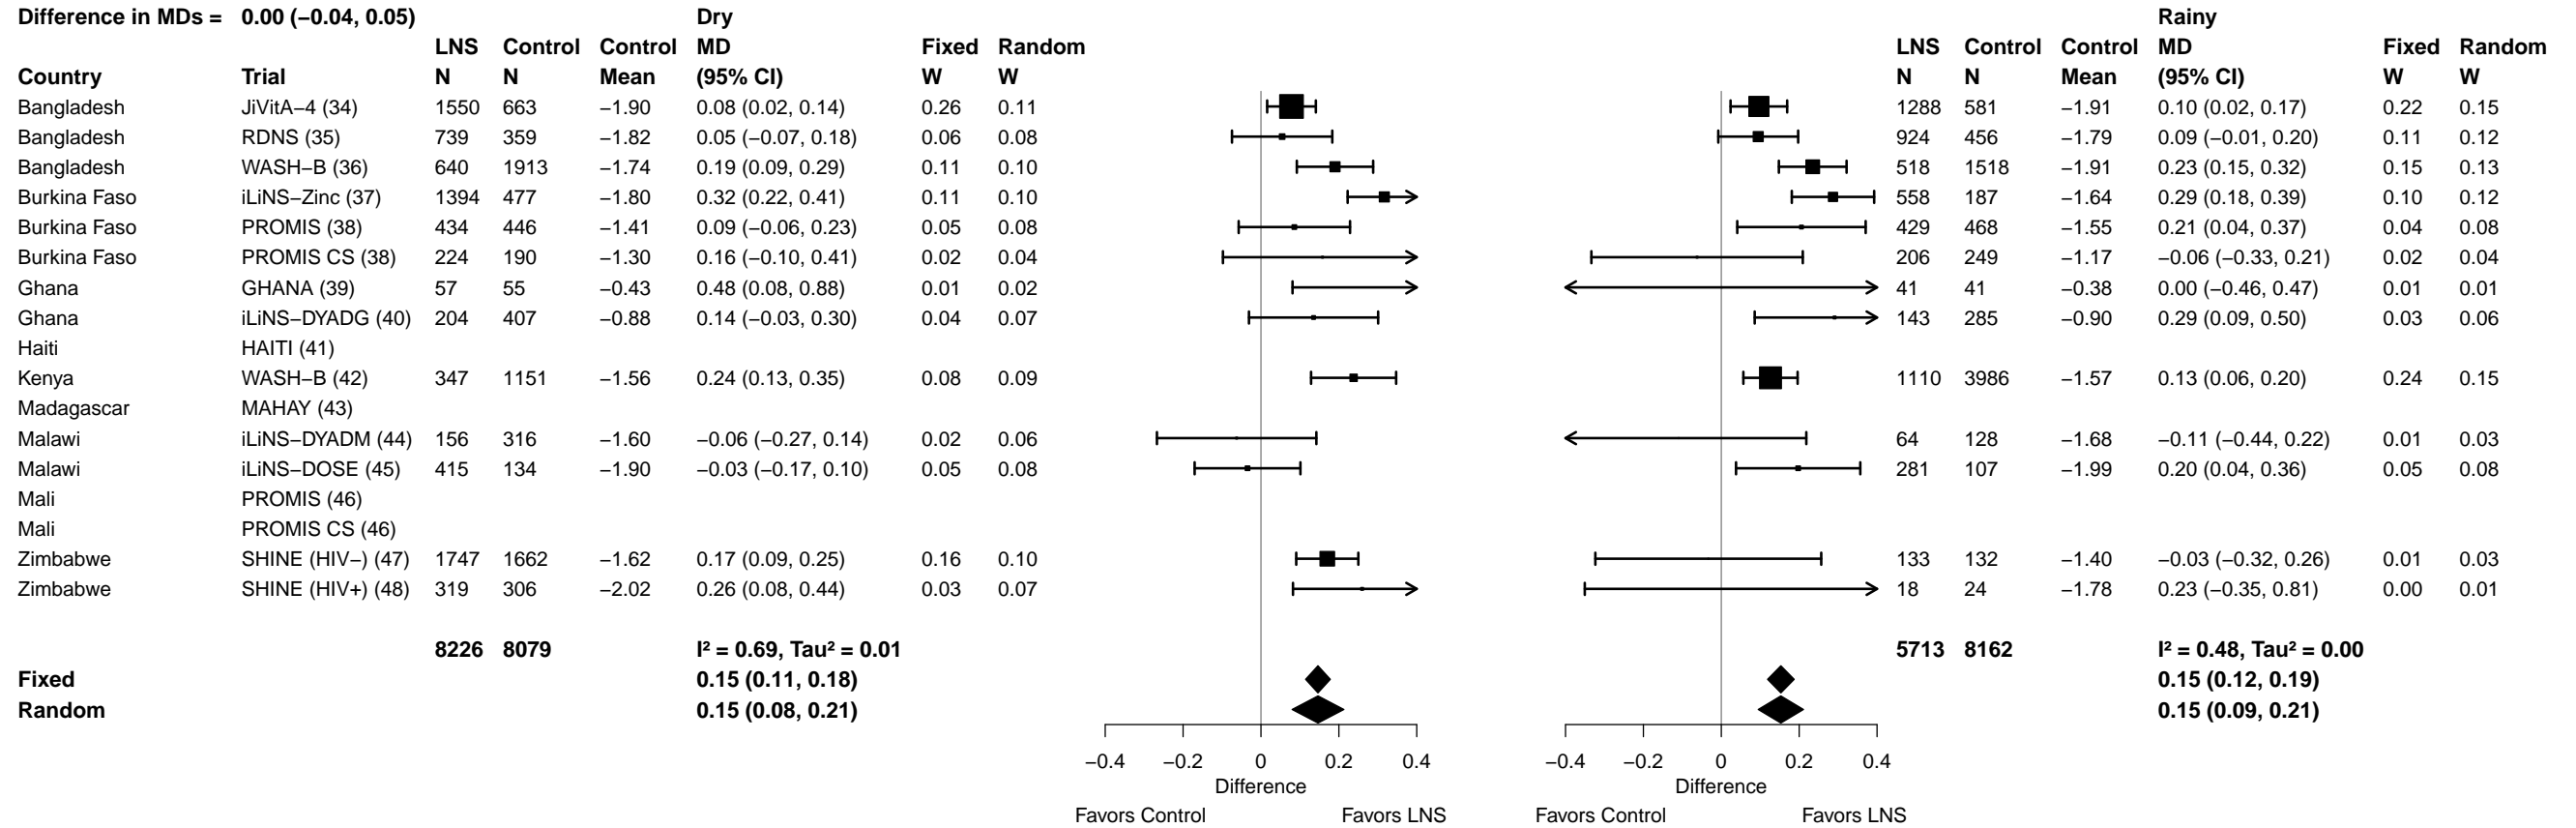

### Supplemental figure 7B: Stunting prevalence ratio

#### 7B1: Stratified by Household socio-economic status

**P-for-interaction = 0.476**  
**Ratio of PRs = 1.02 (0.96, 1.08)**

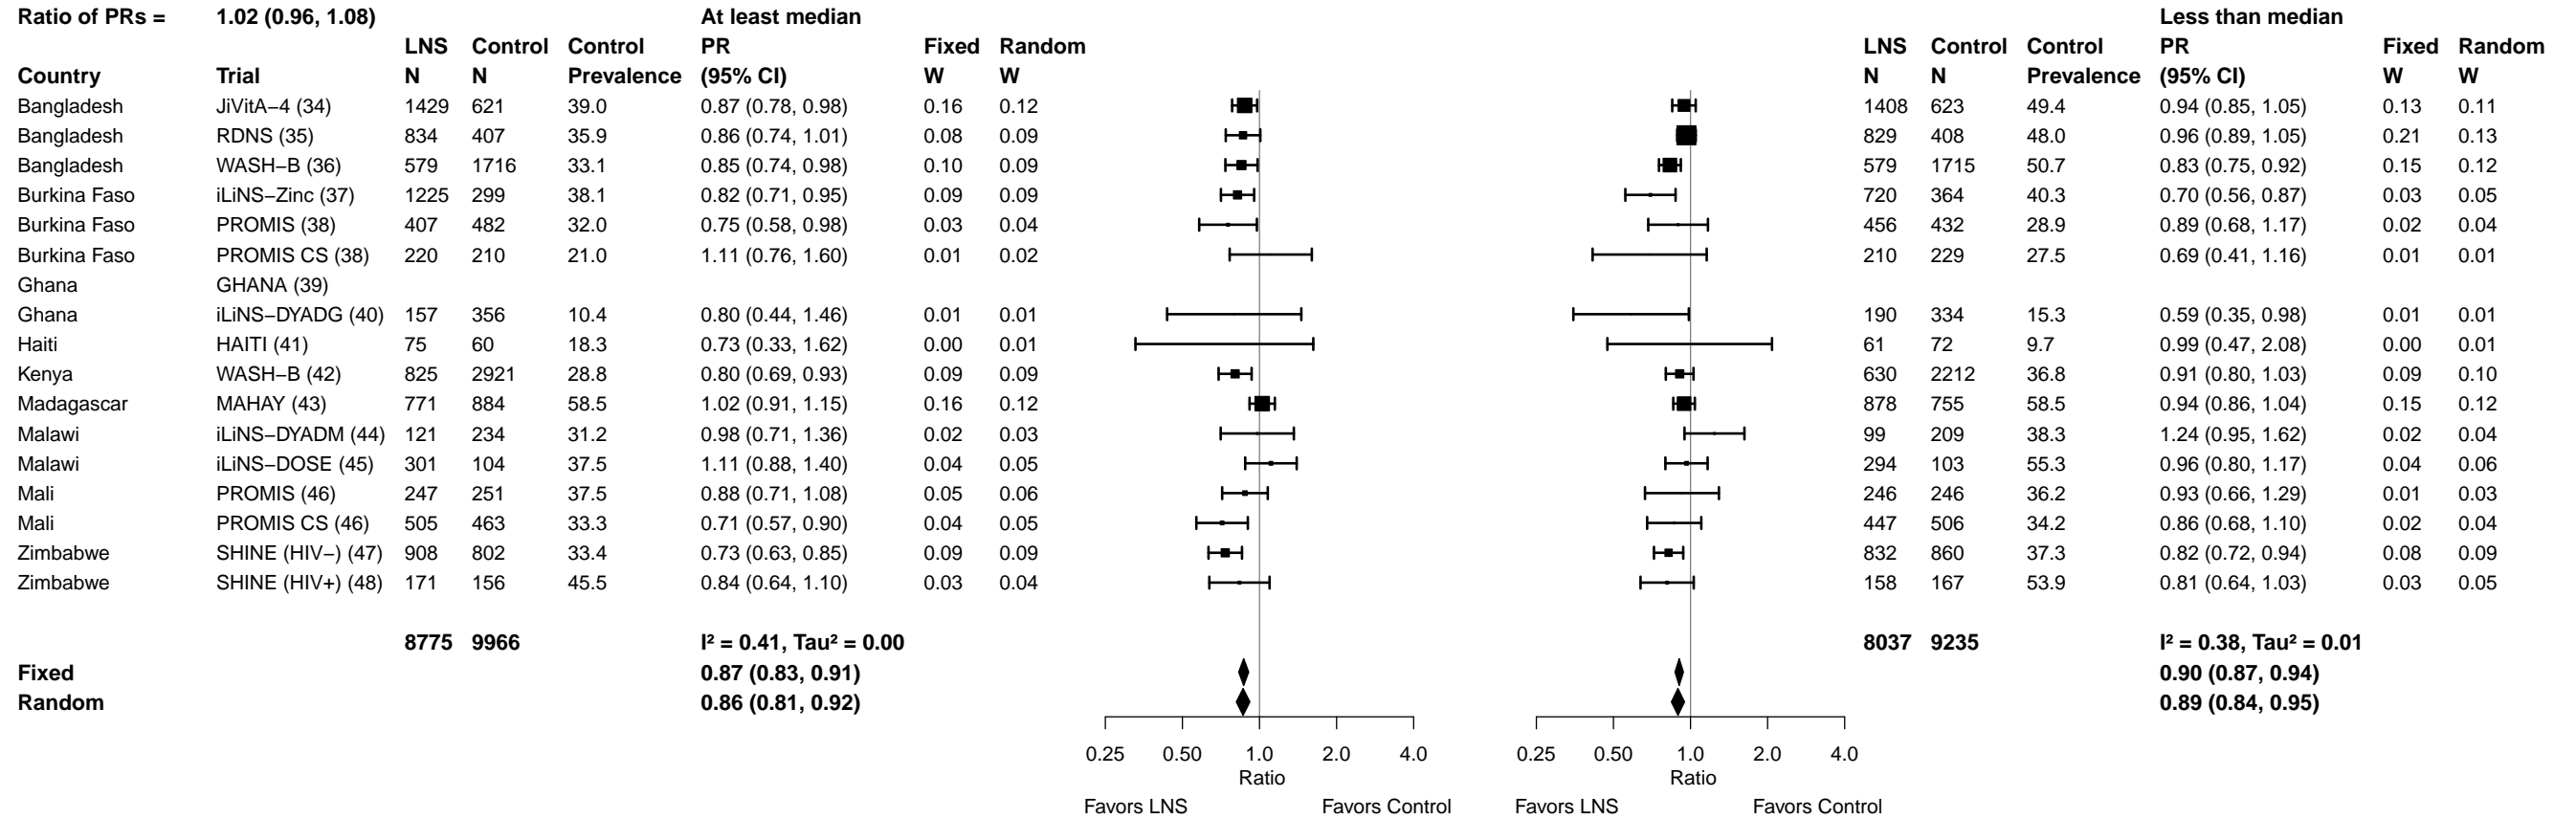

Supplemental figure 7B: Stunting prevalence ratio

7B2: Stratified by Household food insecurity

P-for-interaction = 0.827

Ratio of PRs = 1.01 (0.94, 1.08)

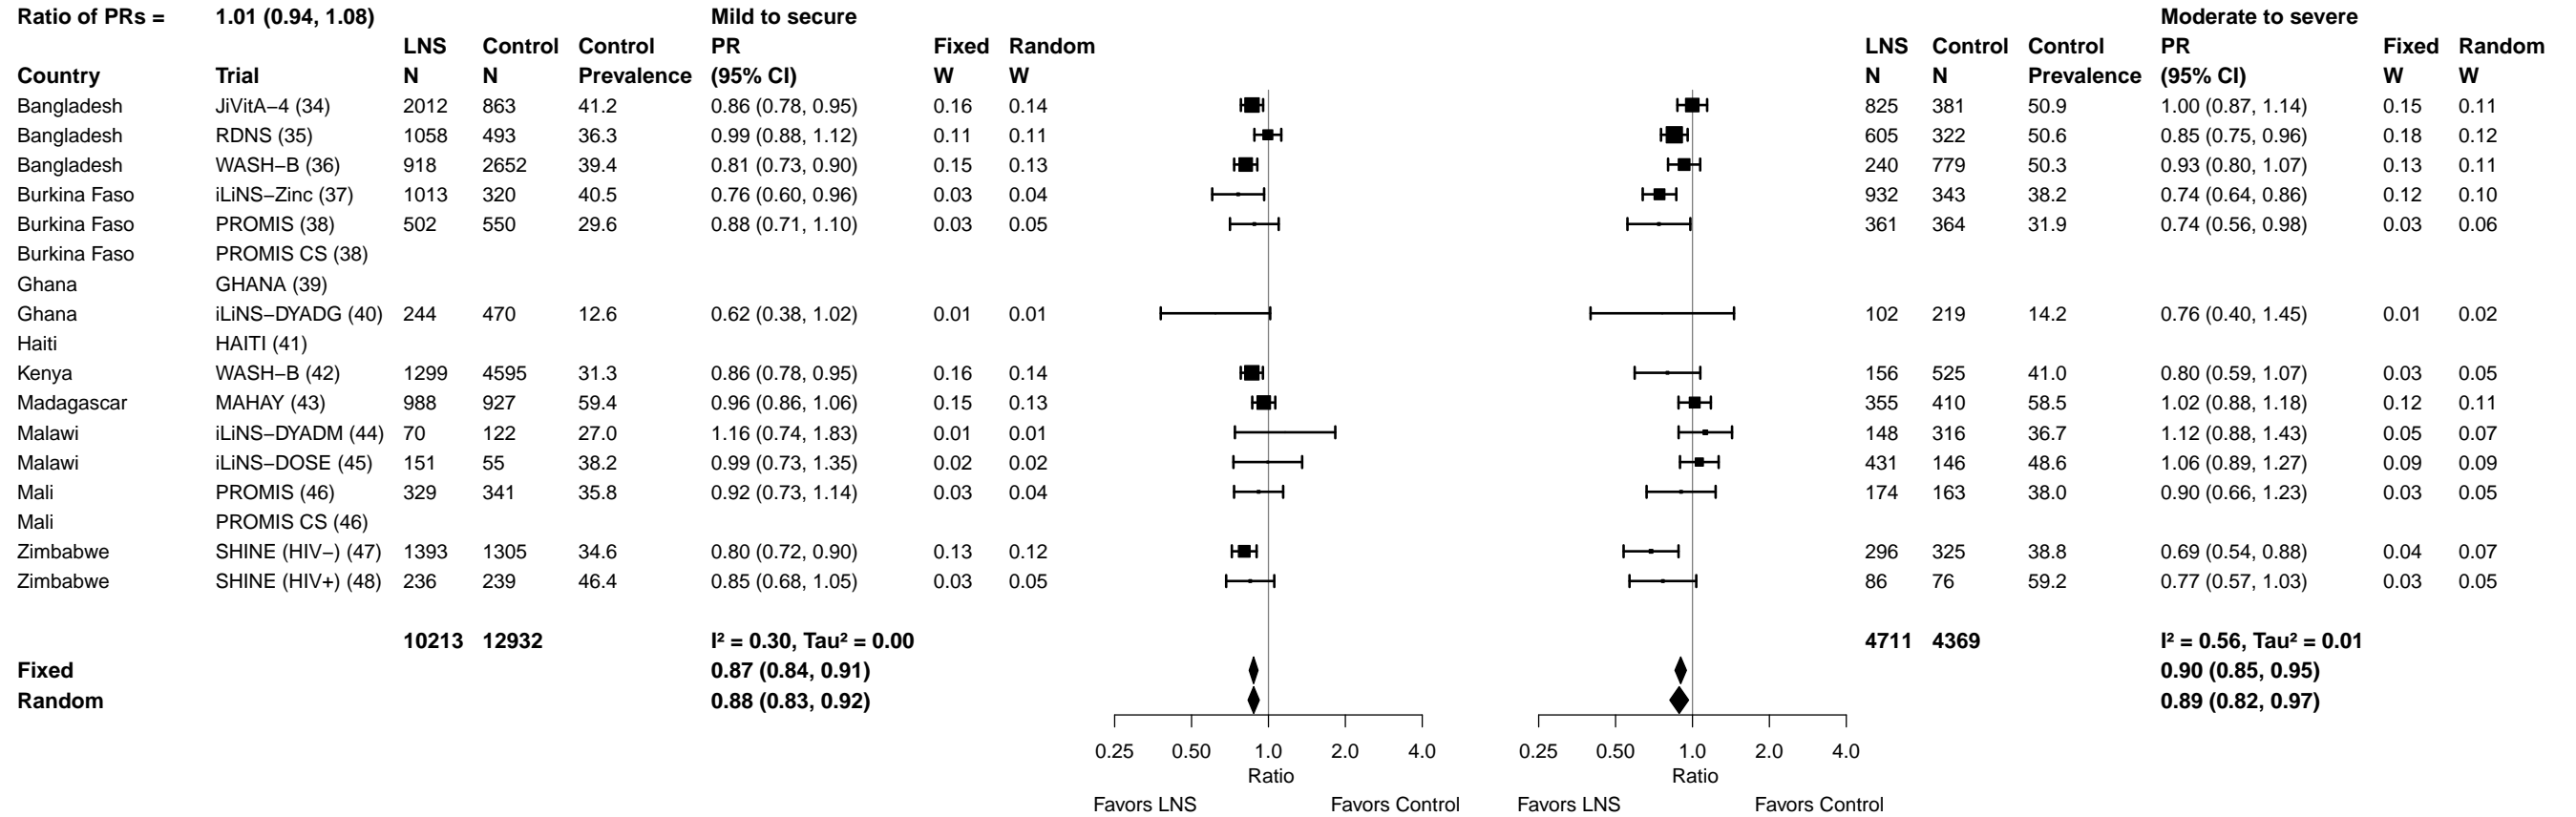

Supplemental figure 7B: Stunting prevalence ratio

7B3: Stratified by Household source water quality

P-for-interaction = 0.782

Ratio of PRs = 1.01 (0.93, 1.10)

| Country       | Trial             | LNS N       | Control N   | Control Prevalence | Improved PR (95% CI)                                | Fixed W | Random W | LNS N       | Control N   | Control Prevalence | Unimproved PR (95% CI)                              | Fixed W | Random W |
|---------------|-------------------|-------------|-------------|--------------------|-----------------------------------------------------|---------|----------|-------------|-------------|--------------------|-----------------------------------------------------|---------|----------|
| Bangladesh    | JiVita-4 (34)     |             |             |                    |                                                     |         |          |             |             |                    |                                                     |         |          |
| Bangladesh    | RDNS (35)         |             |             |                    |                                                     |         |          |             |             |                    |                                                     |         |          |
| Bangladesh    | WASH-B (36)       | 496         | 989         | 40.7               | 0.77 (0.67, 0.88)                                   | 0.18    | 0.15     | 70          | 114         | 43.0               | 1.00 (0.71, 1.40)                                   | 0.03    | 0.07     |
| Burkina Faso  | iLiNS-Zinc (37)   | 550         | 141         | 35.5               | 0.82 (0.68, 0.99)                                   | 0.10    | 0.10     | 1394        | 519         | 40.2               | 0.74 (0.63, 0.86)                                   | 0.15    | 0.14     |
| Burkina Faso  | PROMIS (38)       | 355         | 379         | 31.1               | 0.92 (0.74, 1.15)                                   | 0.07    | 0.08     | 361         | 355         | 31.5               | 0.62 (0.42, 0.92)                                   | 0.03    | 0.06     |
| Burkina Faso  | PROMIS CS (38)    | 280         | 268         | 25.4               | 0.77 (0.54, 1.11)                                   | 0.03    | 0.03     | 149         | 171         | 22.8               | 1.06 (0.71, 1.58)                                   | 0.02    | 0.05     |
| Ghana         | GHANA (39)        |             |             |                    |                                                     |         |          |             |             |                    |                                                     |         |          |
| Ghana         | iLiNS-DYADG (40)  |             |             |                    |                                                     |         |          |             |             |                    |                                                     |         |          |
| Haiti         | HAITI (41)        |             |             |                    |                                                     |         |          |             |             |                    |                                                     |         |          |
| Kenya         | WASH-B (42)       | 447         | 1549        | 30.6               | 0.96 (0.80, 1.14)                                   | 0.11    | 0.11     | 248         | 697         | 33.1               | 0.85 (0.66, 1.09)                                   | 0.06    | 0.10     |
| Madagascar    | MAHAY (43)        | 419         | 453         | 51.4               | 1.02 (0.86, 1.20)                                   | 0.13    | 0.12     | 1203        | 1180        | 61.2               | 0.96 (0.88, 1.05)                                   | 0.47    | 0.18     |
| Malawi        | iLiNS-DYADM (44)  |             |             |                    |                                                     |         |          |             |             |                    |                                                     |         |          |
| Malawi        | iLiNS-DOSE (45)   | 555         | 193         | 46.1               | 1.01 (0.86, 1.19)                                   | 0.13    | 0.12     | 52          | 17          | 47.1               | 1.33 (0.85, 2.07)                                   | 0.02    | 0.05     |
| Mali          | PROMIS (46)       | 249         | 258         | 36.4               | 0.80 (0.63, 1.01)                                   | 0.06    | 0.07     | 247         | 243         | 36.2               | 1.04 (0.82, 1.32)                                   | 0.07    | 0.10     |
| Mali          | PROMIS CS (46)    | 549         | 566         | 31.4               | 0.81 (0.64, 1.02)                                   | 0.06    | 0.07     | 362         | 388         | 37.6               | 0.78 (0.62, 0.98)                                   | 0.07    | 0.11     |
| Zimbabwe      | SHINE (HIV-) (47) | 521         | 489         | 35.2               | 0.77 (0.65, 0.93)                                   | 0.11    | 0.11     | 274         | 302         | 32.5               | 0.97 (0.74, 1.26)                                   | 0.05    | 0.09     |
| Zimbabwe      | SHINE (HIV+) (48) | 85          | 87          | 49.4               | 0.76 (0.55, 1.05)                                   | 0.03    | 0.04     | 55          | 56          | 57.1               | 0.76 (0.50, 1.16)                                   | 0.02    | 0.05     |
|               |                   | <b>4506</b> | <b>5372</b> |                    | <b>I<sup>2</sup> = 0.36, Tau<sup>2</sup> = 0.00</b> |         |          | <b>4415</b> | <b>4042</b> |                    | <b>I<sup>2</sup> = 0.50, Tau<sup>2</sup> = 0.01</b> |         |          |
| <b>Fixed</b>  |                   |             |             |                    | <b>0.87 (0.82, 0.92)</b>                            |         |          |             |             |                    | <b>0.90 (0.85, 0.96)</b>                            |         |          |
| <b>Random</b> |                   |             |             |                    | <b>0.87 (0.81, 0.93)</b>                            |         |          |             |             |                    | <b>0.89 (0.80, 0.99)</b>                            |         |          |

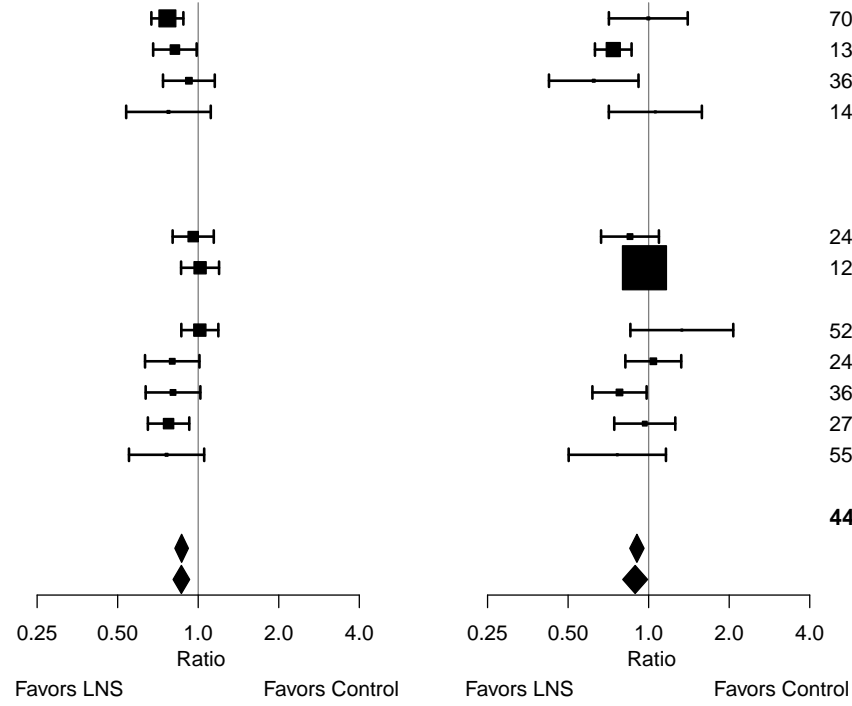

Supplemental figure 7B: Stunting prevalence ratio

7B4: Stratified by Household sanitation

P-for-interaction = 0.200

Ratio of PRs = 1.06 (0.97, 1.17)

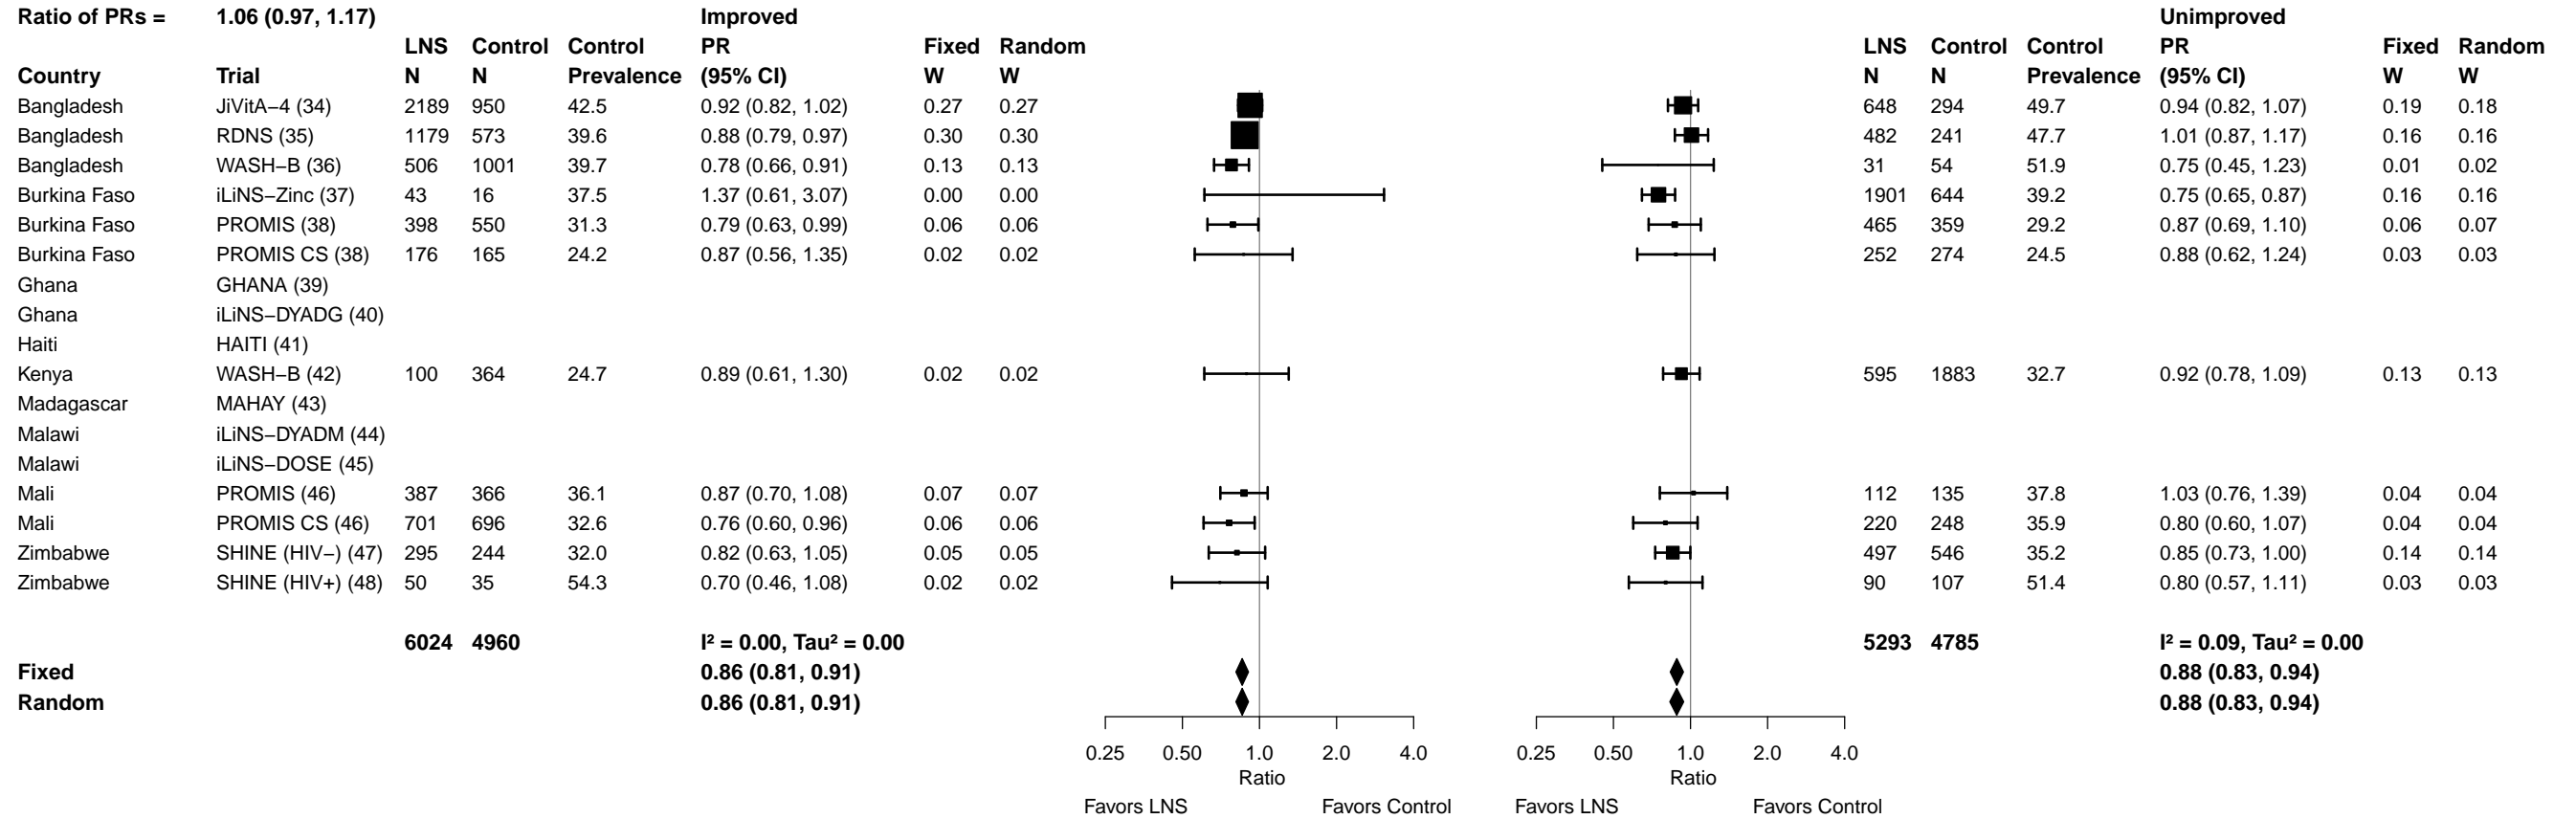



Supplemental figure 7B: Stunting prevalence ratio

7B5: Stratified by Home environment

P-for-interaction = 0.280

Ratio of PRs = 0.96 (0.89, 1.03)

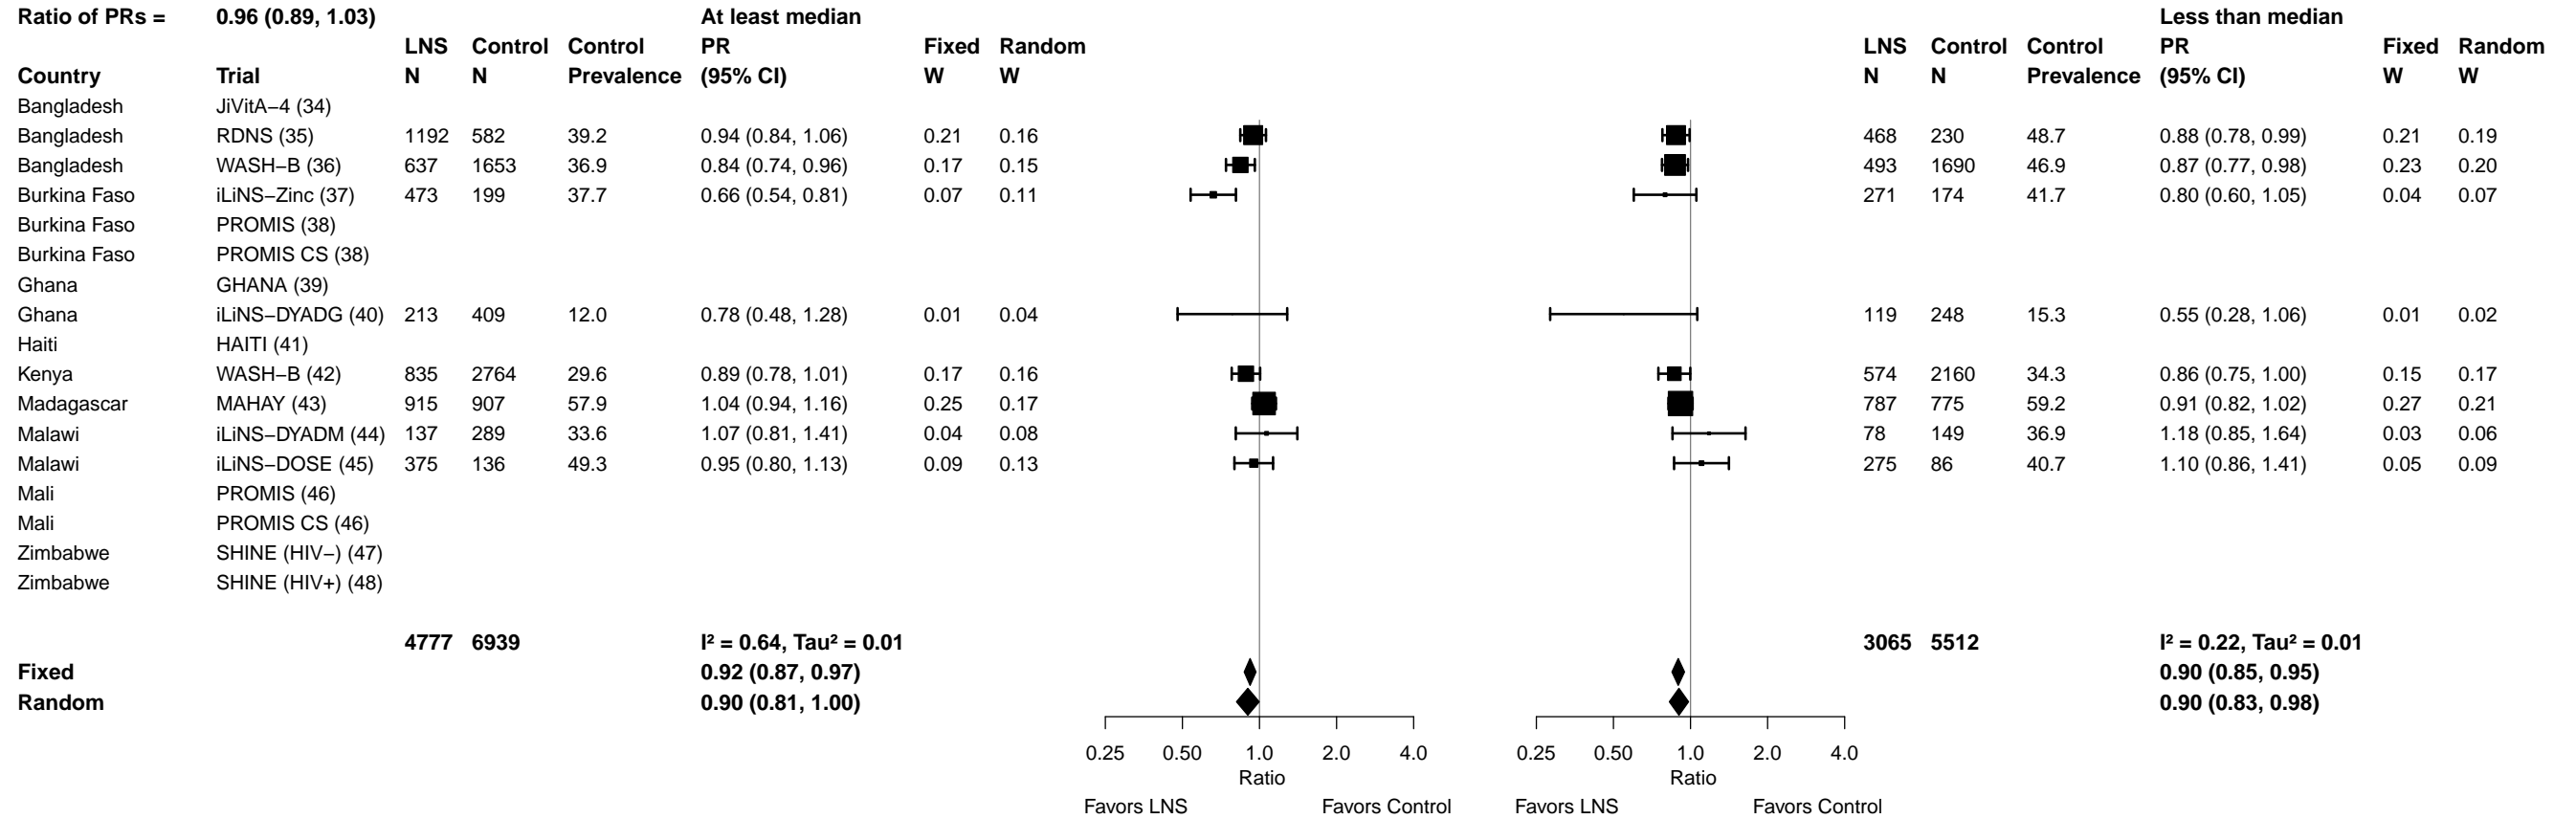

Supplemental figure 7B: Stunting prevalence ratio

7B6: Stratified by Season at the time of assessment

P-for-interaction = 0.389  
 Ratio of PRs = 0.97 (0.90, 1.04)

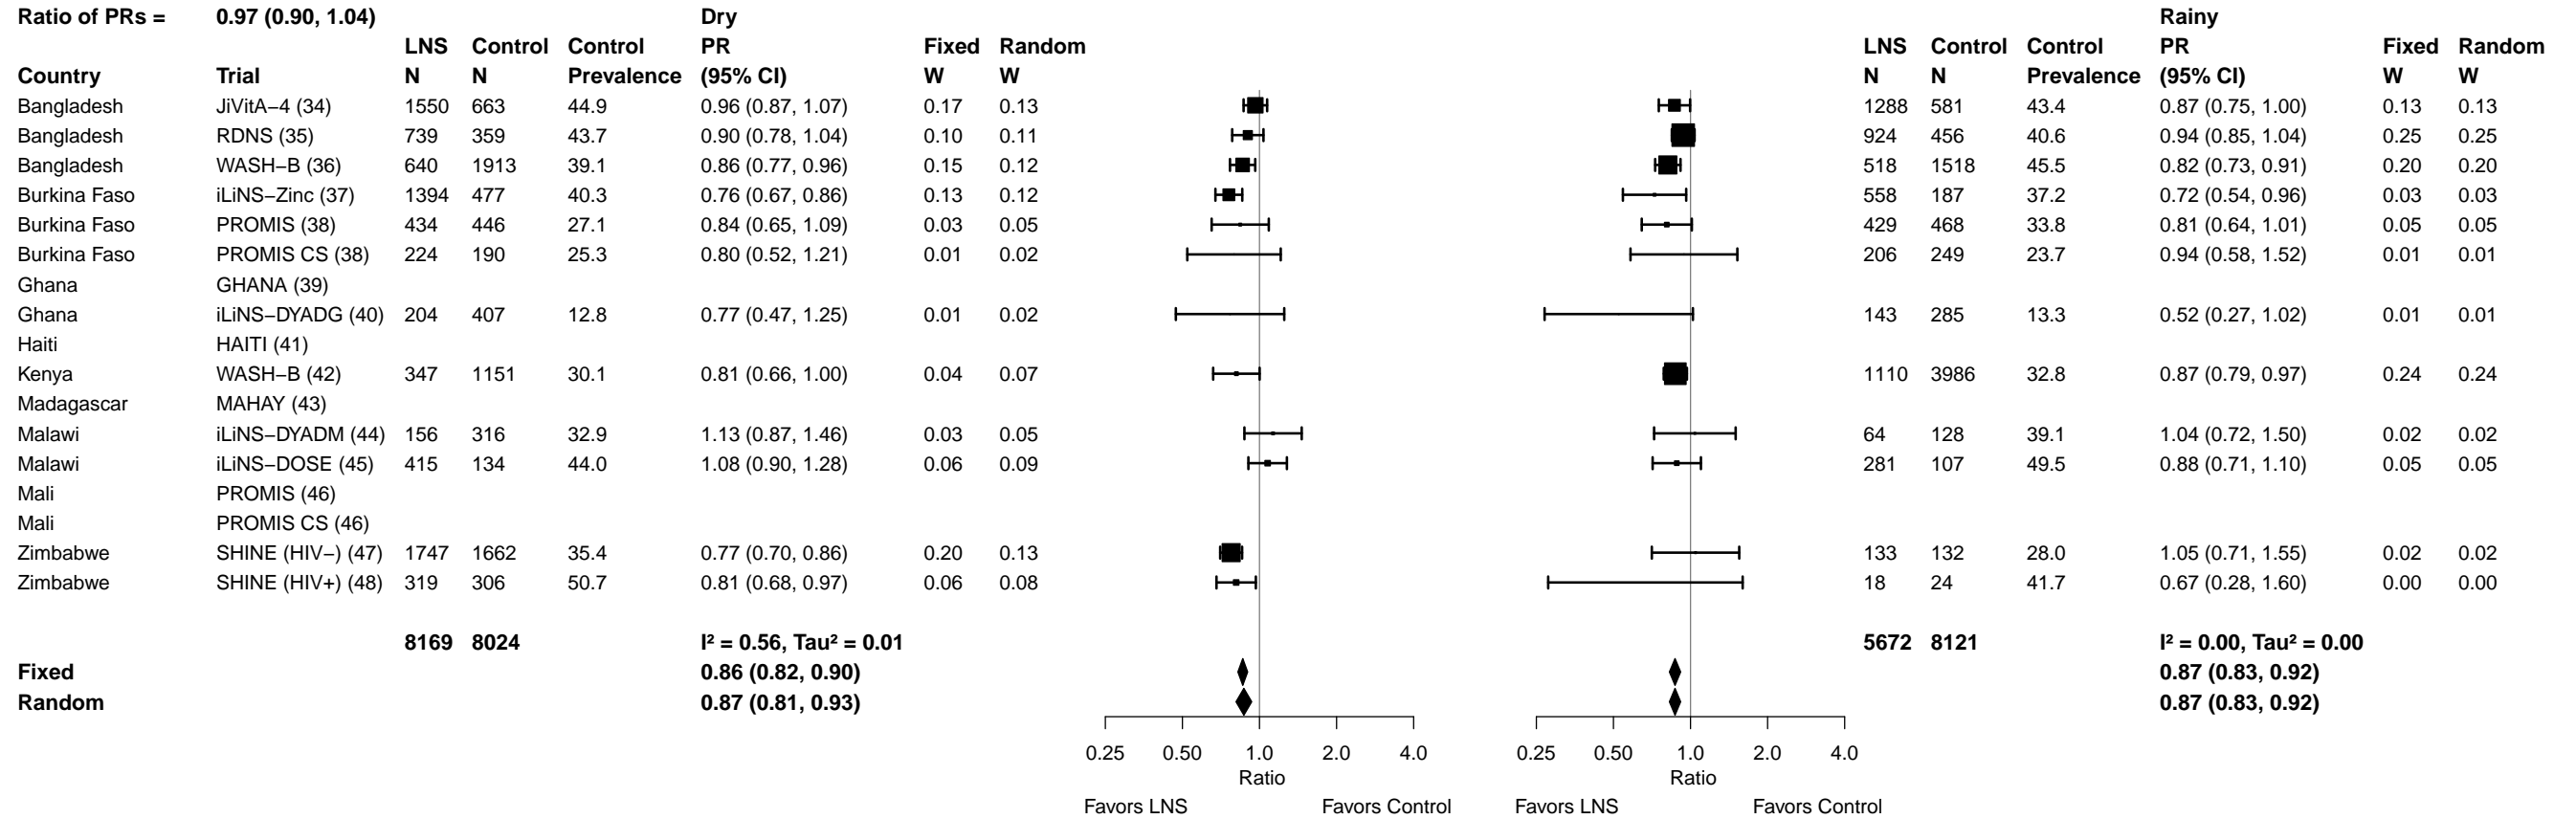

### Supplemental figure 7C: Stunting prevalence difference

#### 7C1: Stratified by Household socio-economic status

P-for-interaction = 0.724

Difference in PDs = 0.00 (-0.02, 0.02)

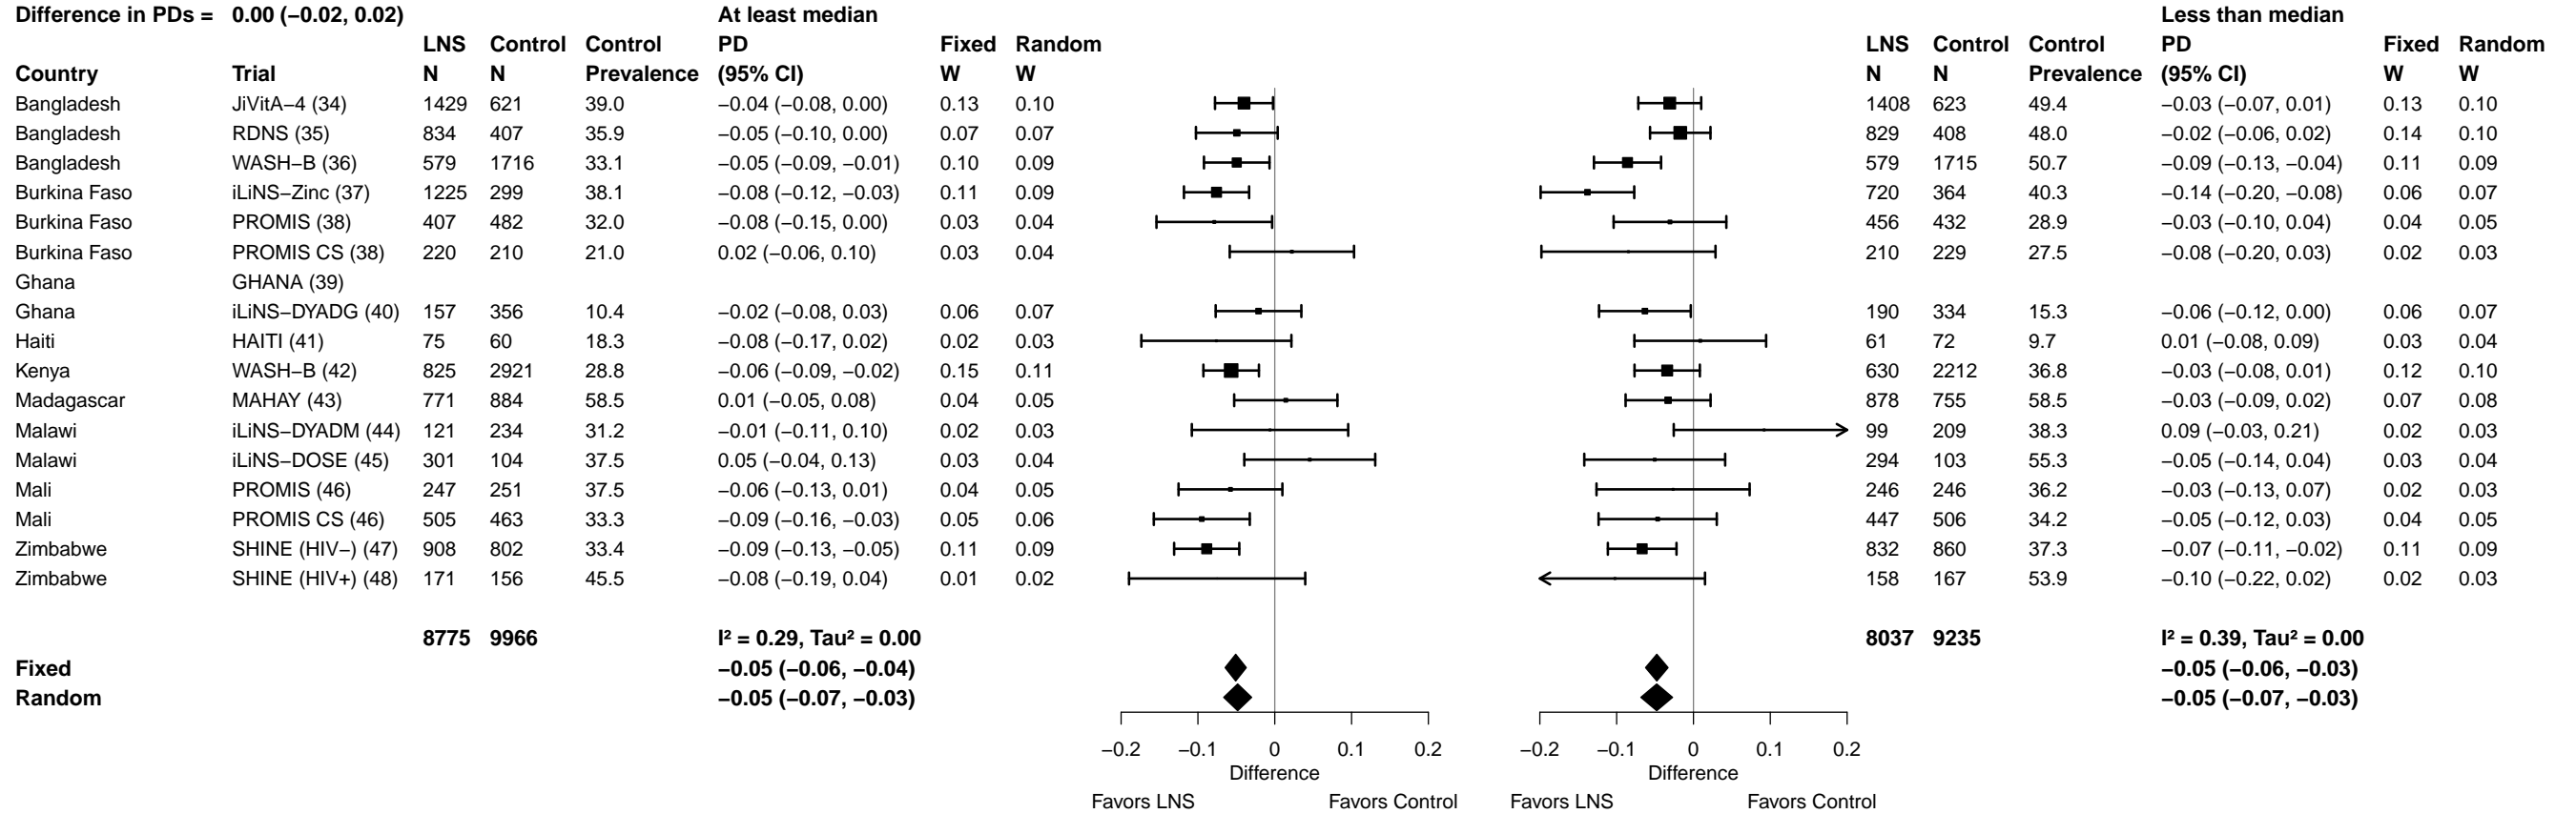

Supplemental figure 7C: Stunting prevalence difference

7C2: Stratified by Household food insecurity

P-for-interaction = 0.663

Difference in PDs = -0.01 (-0.03, 0.02)

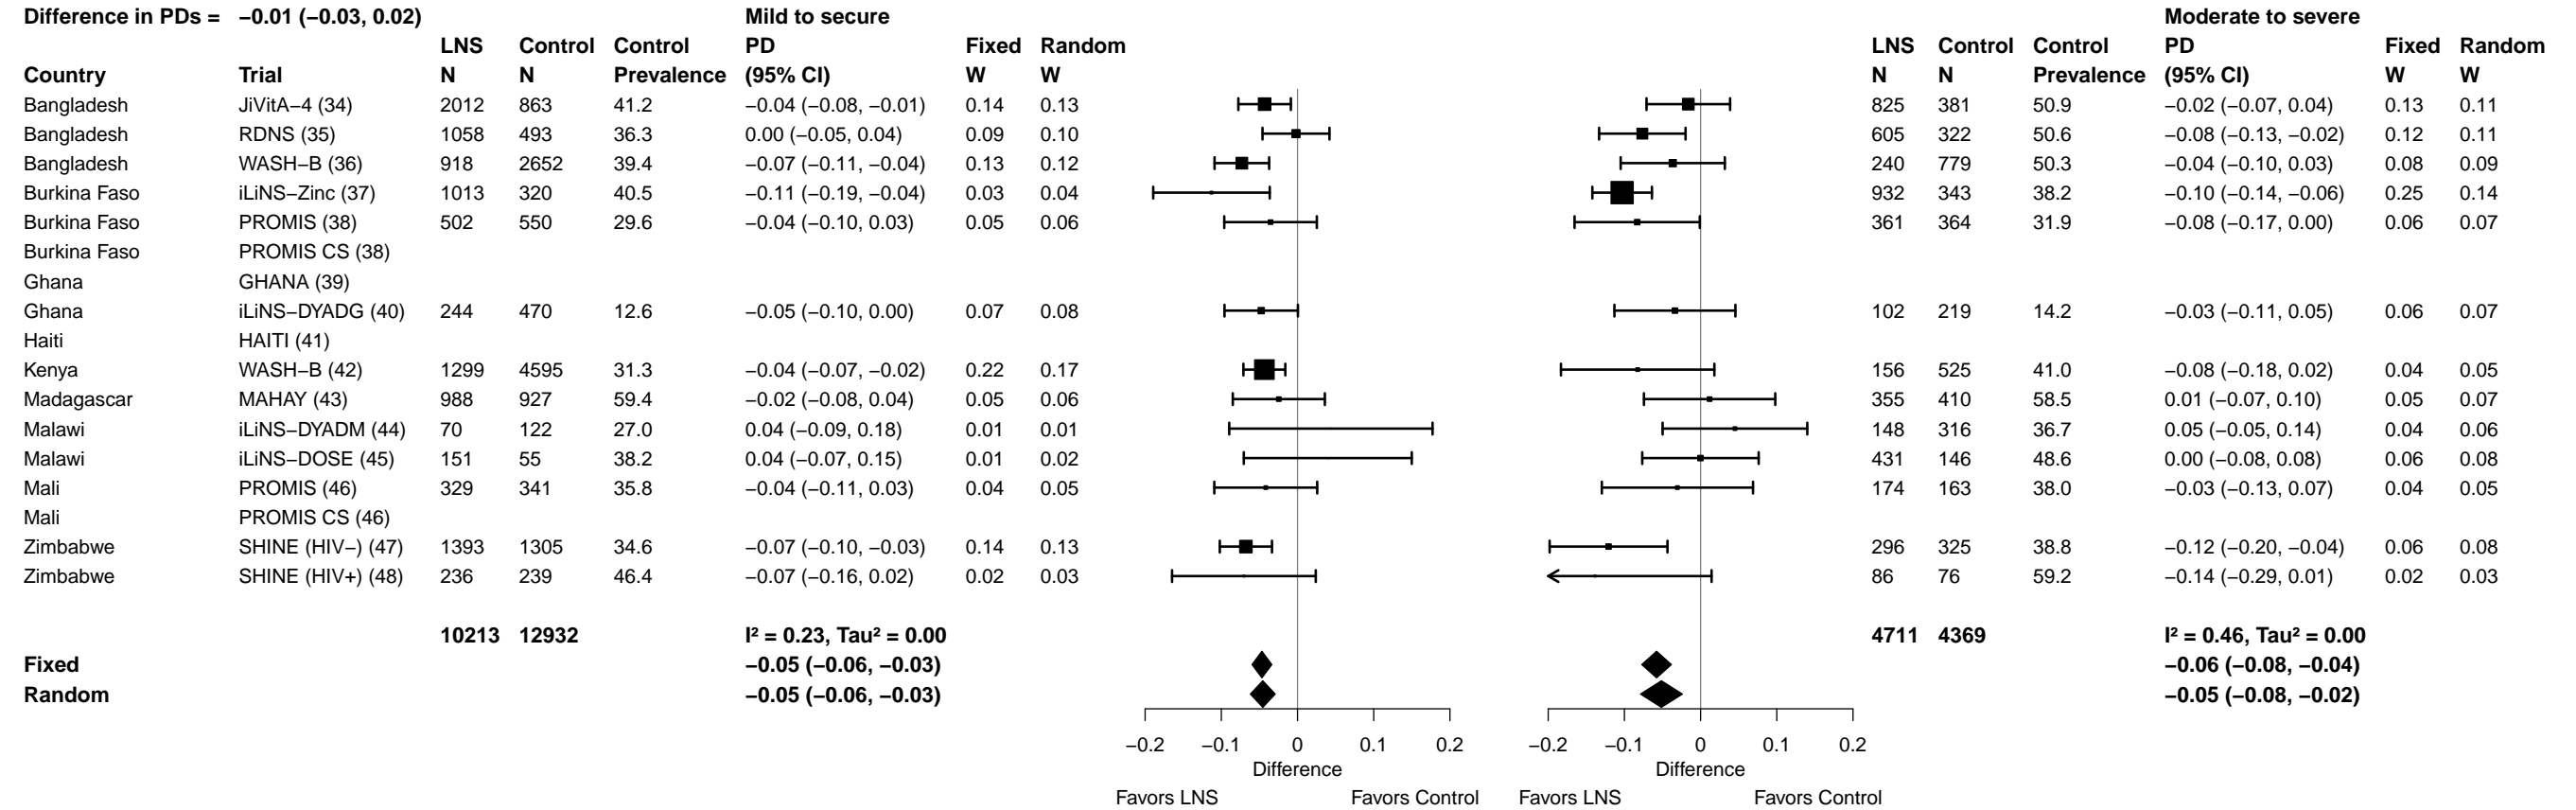

Supplemental figure 7C: Stunting prevalence difference

7C3: Stratified by Household source water quality

P-for-interaction = 0.469

Difference in PDs = -0.01 (-0.04, 0.02)

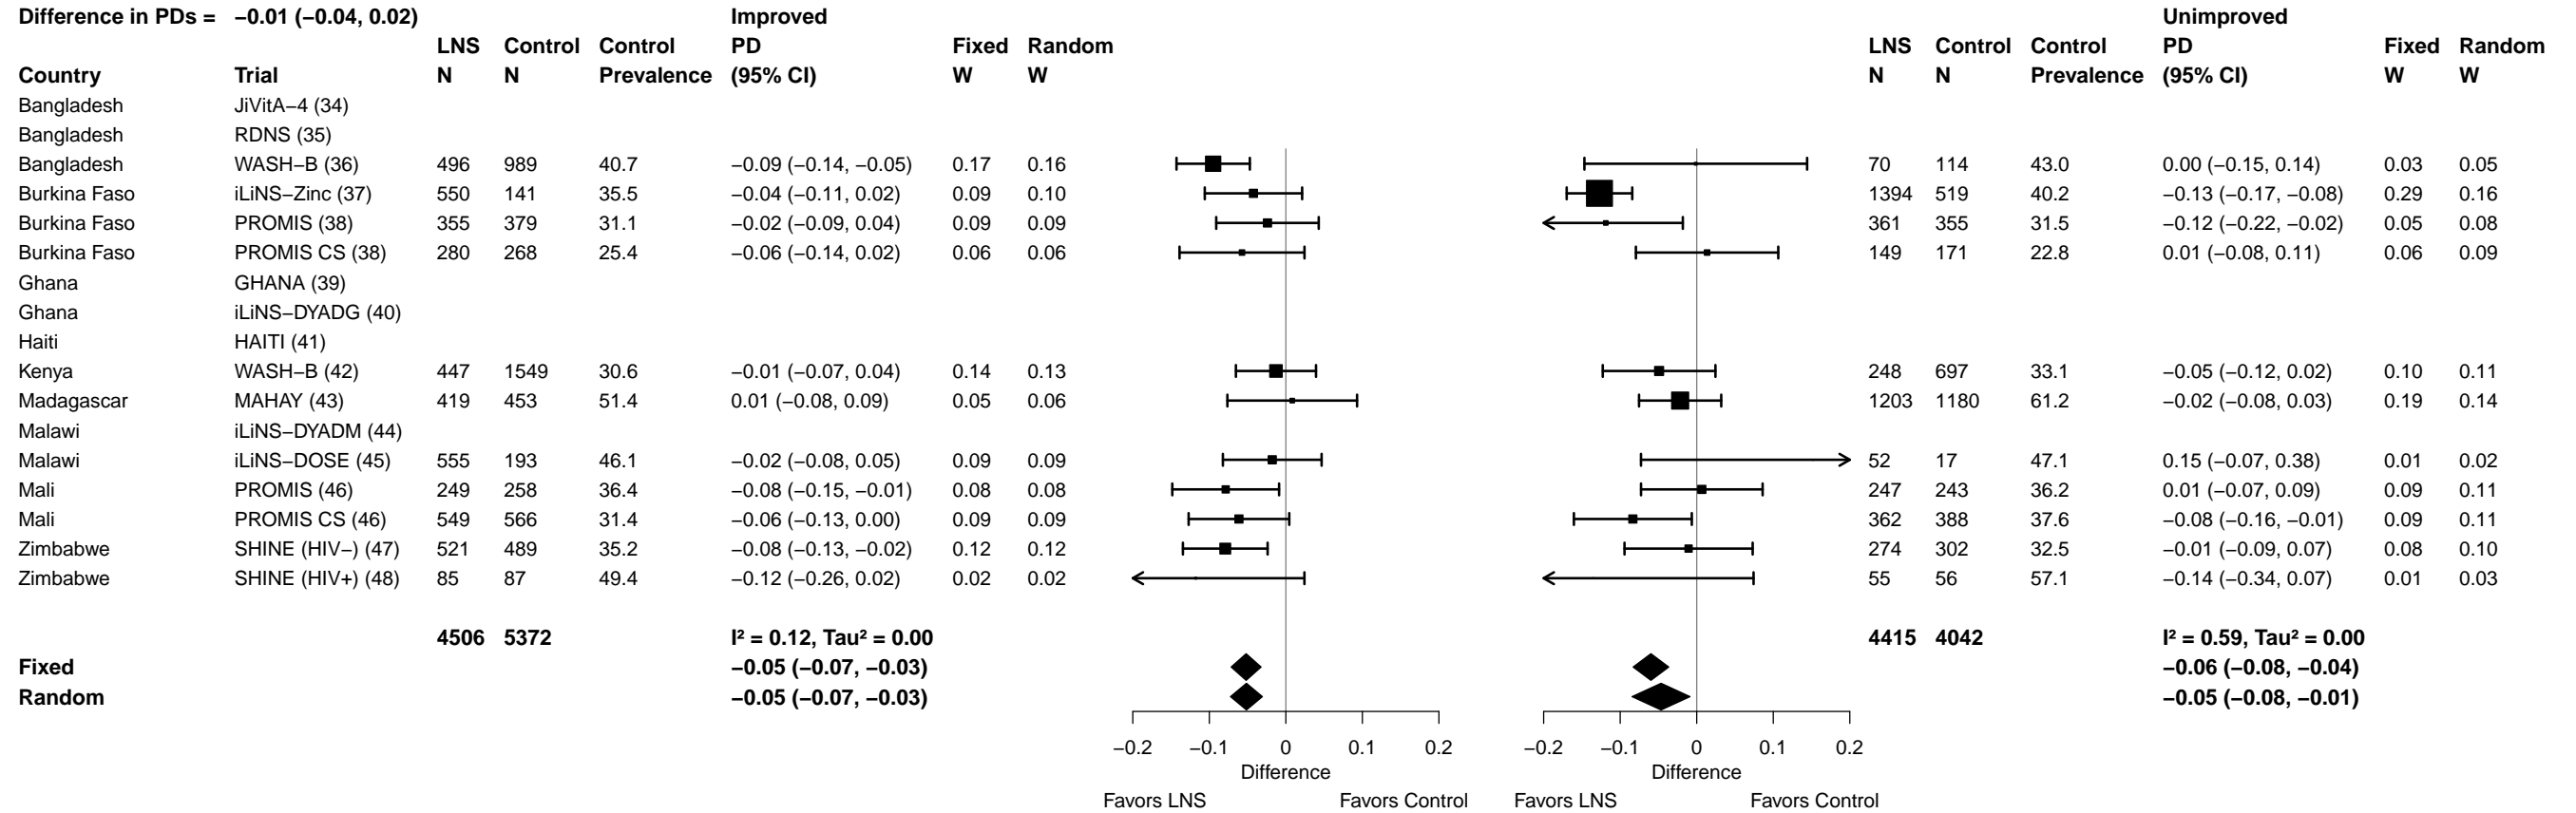

Supplemental figure 7C: Stunting prevalence difference

7C4: Stratified by Household sanitation

P-for-interaction = 0.310

Difference in PDs = 0.02 (-0.01, 0.05)

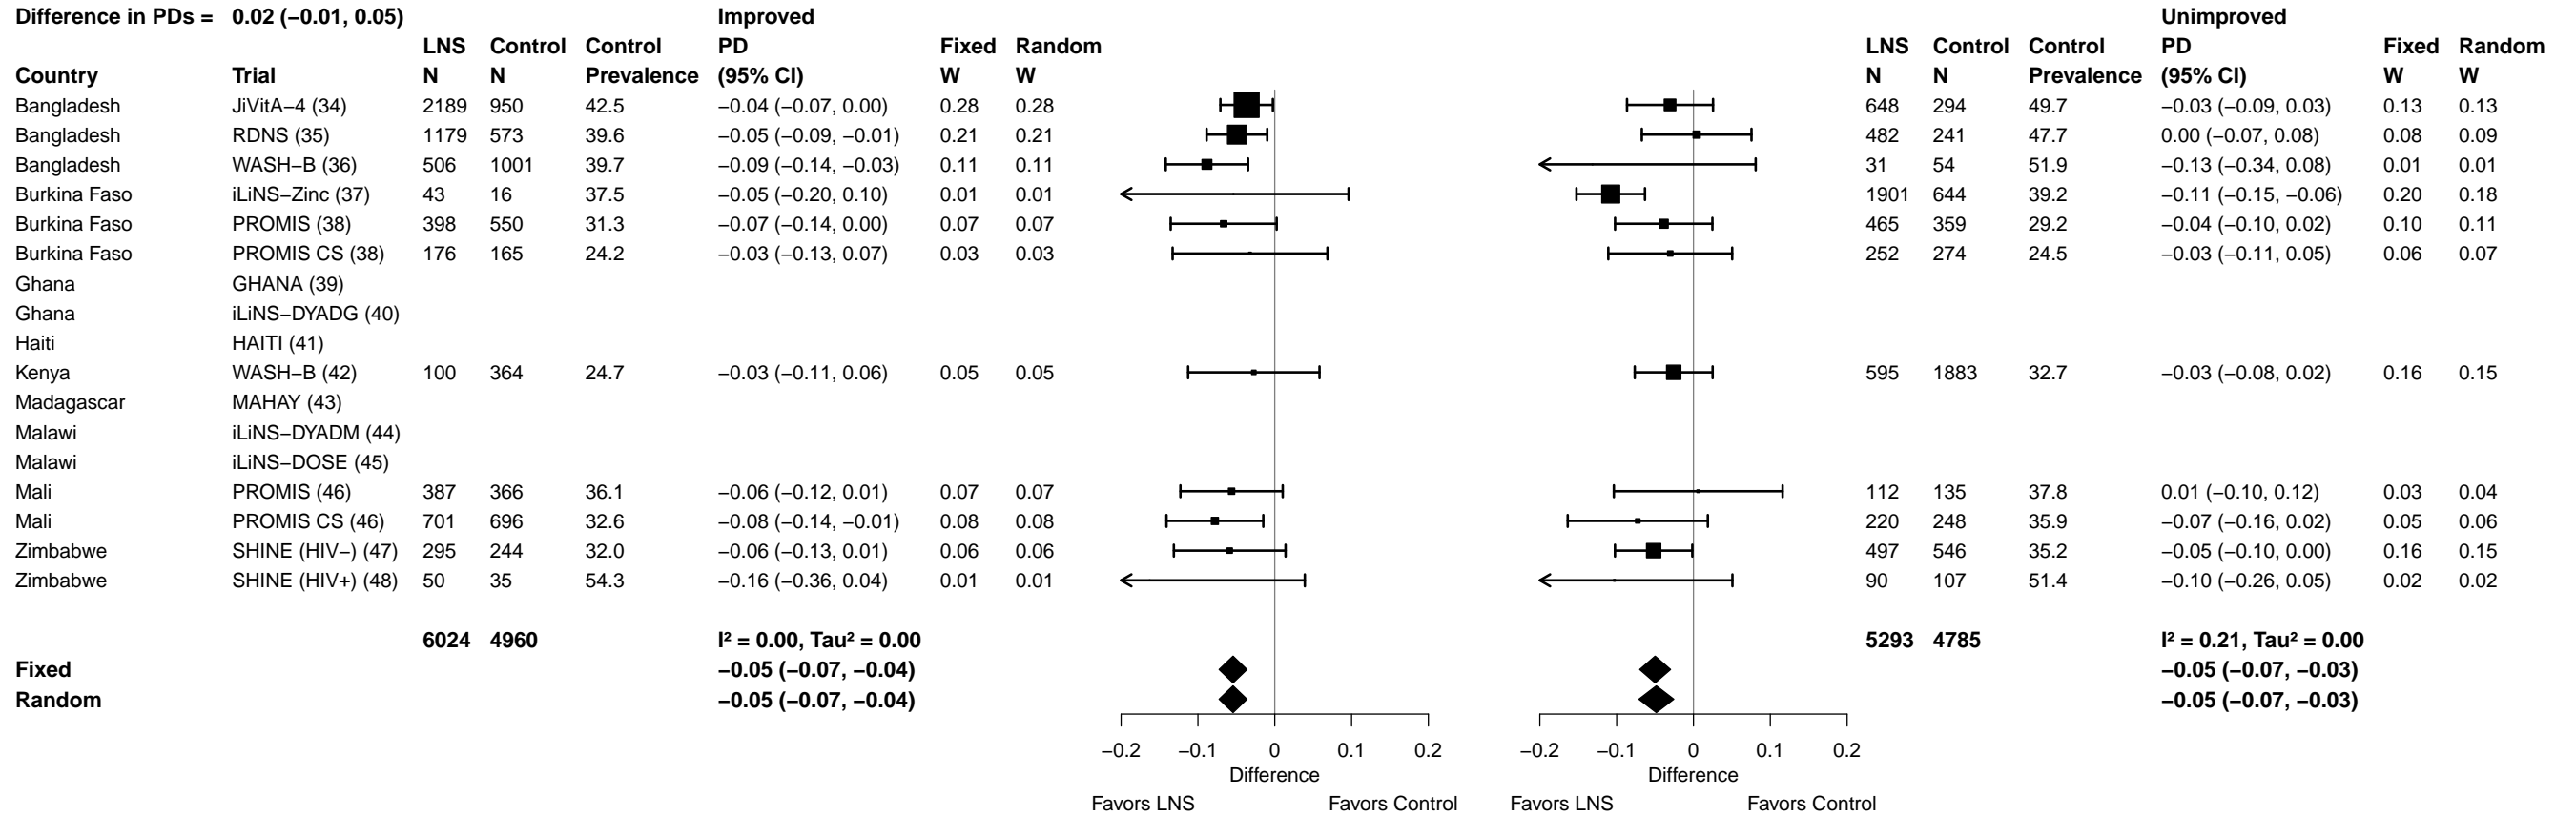

Supplemental figure 7C: Stunting prevalence difference

7C5: Stratified by Home environment

P-for-interaction = 0.228

Difference in PDs = -0.02 (-0.05, 0.01)

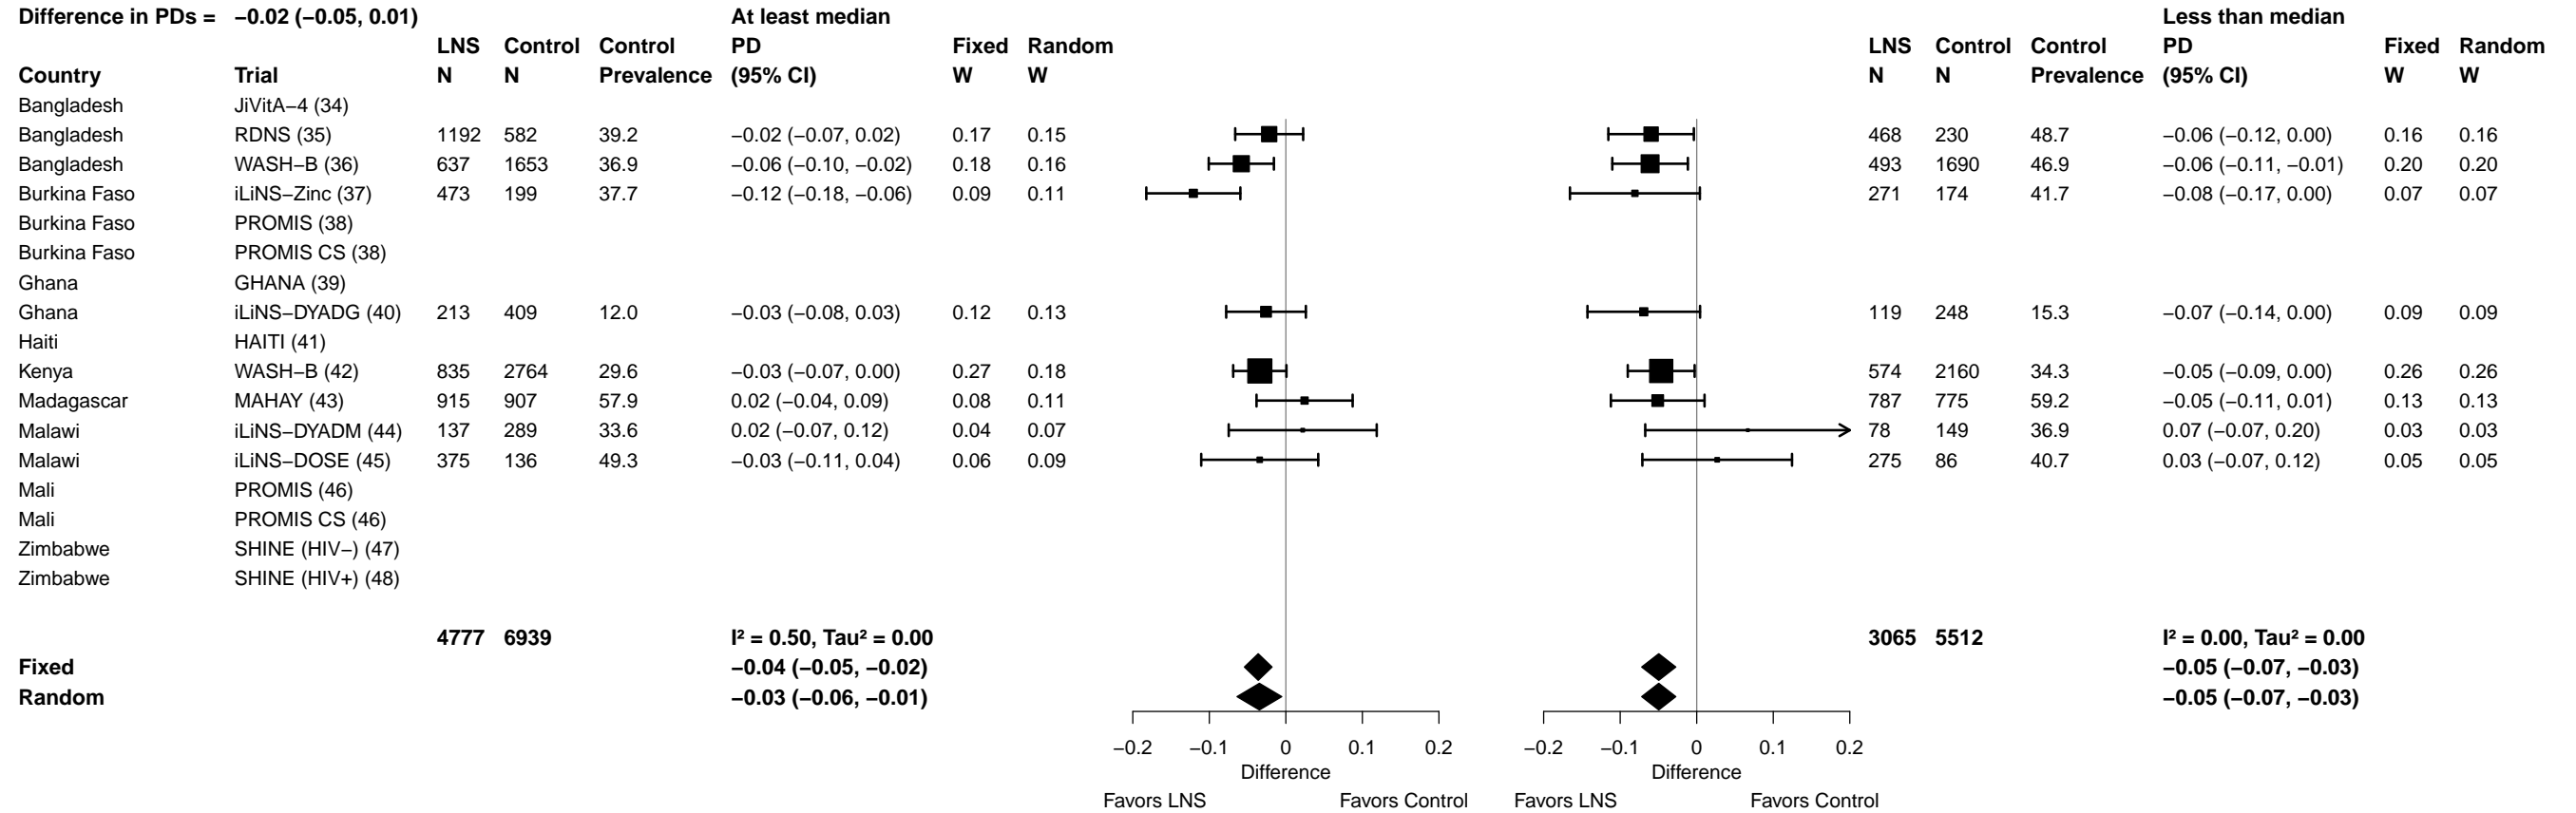

Supplemental figure 7C: Stunting prevalence difference

7C6: Stratified by Season at the time of assessment

P-for-interaction = 0.493

Difference in PDs = -0.01 (-0.03, 0.02)

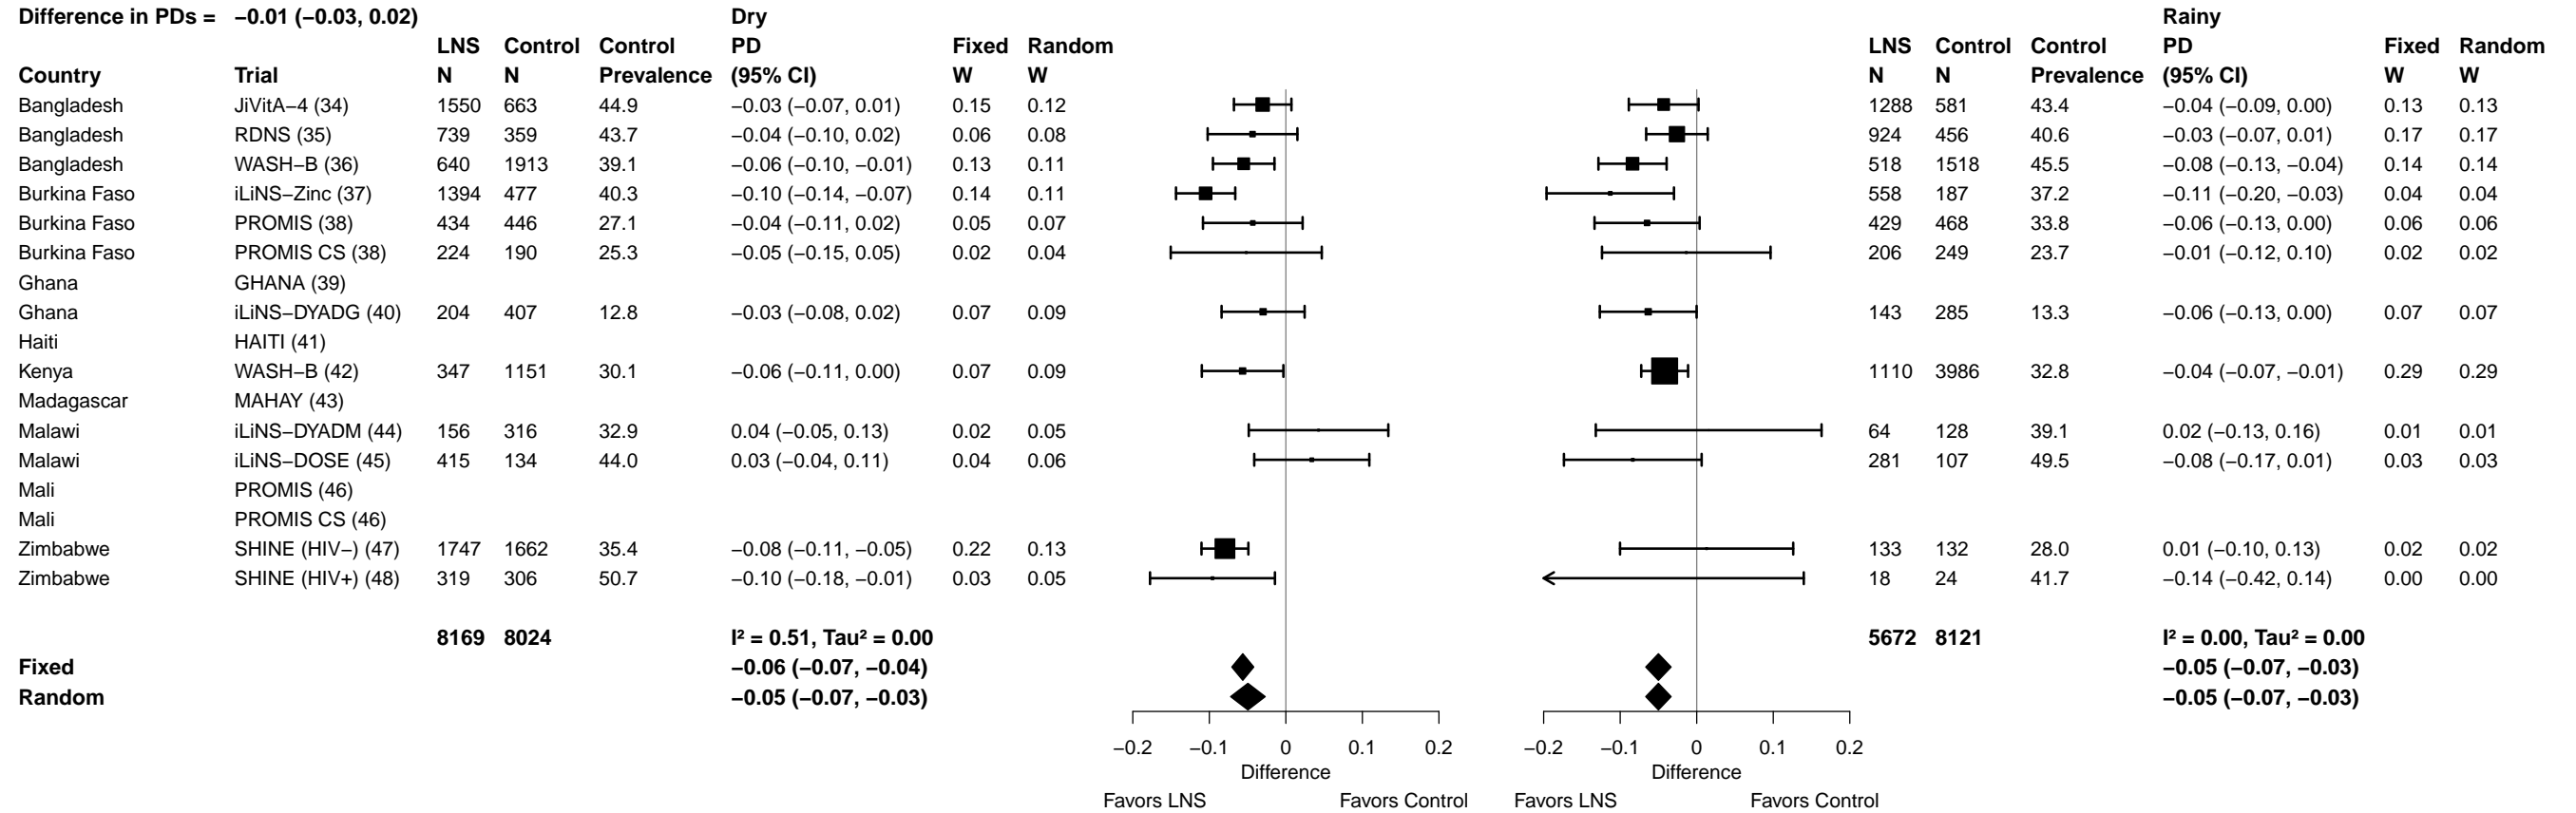



### Supplemental figure 7D: Mean difference in WLZ

#### 7D1: Stratified by Household socio-economic status

P-for-interaction = 0.814  
 Difference in MDs = 0.00 (-0.03, 0.04)

| Country       | Trial             | LNS<br>N    | Control<br>N | Control<br>Mean                                     | At least median     |      | Fixed<br>W | Random<br>W |  | Less than median |             | Fixed<br>W                                          | Random<br>W         |      |      |
|---------------|-------------------|-------------|--------------|-----------------------------------------------------|---------------------|------|------------|-------------|--|------------------|-------------|-----------------------------------------------------|---------------------|------|------|
|               |                   |             |              |                                                     | MD<br>(95% CI)      |      |            |             |  | MD<br>(95% CI)   |             |                                                     |                     |      |      |
| Bangladesh    | JiVitA-4 (34)     | 1401        | 607          | -1.10                                               | 0.10 (0.04, 0.16)   | 0.22 | 0.15       |             |  | 1381             | 610         | -1.24                                               | 0.06 (-0.01, 0.12)  | 0.20 | 0.13 |
| Bangladesh    | RDNS (35)         | 834         | 407          | -1.01                                               | 0.04 (-0.07, 0.15)  | 0.07 | 0.08       |             |  | 827              | 408         | -1.21                                               | 0.10 (0.01, 0.19)   | 0.10 | 0.10 |
| Bangladesh    | WASH-B (36)       | 579         | 1714         | -0.72                                               | 0.12 (0.02, 0.21)   | 0.09 | 0.09       |             |  | 577              | 1710        | -1.02                                               | 0.13 (0.04, 0.22)   | 0.10 | 0.10 |
| Burkina Faso  | iLiNS-Zinc (37)   | 1225        | 299          | -0.90                                               | 0.19 (0.09, 0.29)   | 0.08 | 0.09       |             |  | 720              | 364         | -0.97                                               | 0.16 (0.09, 0.23)   | 0.15 | 0.12 |
| Burkina Faso  | PROMIS (38)       | 405         | 479          | -0.66                                               | 0.05 (-0.07, 0.17)  | 0.06 | 0.06       |             |  | 451              | 428         | -0.77                                               | 0.16 (-0.04, 0.35)  | 0.02 | 0.03 |
| Burkina Faso  | PROMIS CS (38)    | 220         | 208          | -0.91                                               | -0.06 (-0.25, 0.13) | 0.02 | 0.03       |             |  | 210              | 228         | -0.86                                               | -0.16 (-0.34, 0.02) | 0.03 | 0.04 |
| Ghana         | GHANA (39)        | 57          | 44           | -0.41                                               | 0.06 (-0.46, 0.57)  | 0.00 | 0.00       |             |  | 41               | 46          | -0.84                                               | 0.30 (-0.15, 0.74)  | 0.00 | 0.01 |
| Ghana         | iLiNS-DYADG (40)  | 157         | 356          | -0.53                                               | 0.10 (-0.09, 0.29)  | 0.02 | 0.03       |             |  | 190              | 334         | -0.65                                               | 0.10 (-0.08, 0.28)  | 0.03 | 0.04 |
| Haiti         | HAITI (41)        | 74          | 60           | 0.23                                                | -0.04 (-0.28, 0.20) | 0.01 | 0.02       |             |  | 61               | 72          | -0.22                                               | 0.15 (-0.07, 0.37)  | 0.02 | 0.03 |
| Kenya         | WASH-B (42)       | 825         | 2914         | 0.13                                                | 0.07 (-0.01, 0.15)  | 0.13 | 0.11       |             |  | 628              | 2200        | 0.05                                                | 0.06 (-0.03, 0.15)  | 0.11 | 0.10 |
| Madagascar    | MAHAY (43)        | 771         | 884          | -0.31                                               | 0.01 (-0.12, 0.13)  | 0.05 | 0.06       |             |  | 876              | 755         | -0.56                                               | 0.04 (-0.10, 0.19)  | 0.04 | 0.05 |
| Malawi        | iLiNS-DYADM (44)  | 121         | 234          | -0.12                                               | -0.04 (-0.24, 0.17) | 0.02 | 0.03       |             |  | 99               | 209         | -0.14                                               | -0.08 (-0.33, 0.18) | 0.01 | 0.02 |
| Malawi        | iLiNS-DOSE (45)   | 301         | 104          | -0.13                                               | -0.04 (-0.21, 0.13) | 0.03 | 0.04       |             |  | 294              | 103         | -0.38                                               | 0.11 (-0.10, 0.32)  | 0.02 | 0.03 |
| Mali          | PROMIS (46)       | 246         | 250          | -0.32                                               | 0.13 (-0.01, 0.27)  | 0.04 | 0.05       |             |  | 245              | 246         | -0.32                                               | 0.06 (-0.09, 0.22)  | 0.03 | 0.05 |
| Mali          | PROMIS CS (46)    | 501         | 458          | -0.77                                               | 0.17 (0.04, 0.30)   | 0.05 | 0.06       |             |  | 443              | 501         | -0.77                                               | 0.15 (0.01, 0.29)   | 0.04 | 0.05 |
| Zimbabwe      | SHINE (HIV-) (47) | 903         | 797          | 0.08                                                | 0.04 (-0.07, 0.14)  | 0.08 | 0.08       |             |  | 826              | 856         | -0.06                                               | 0.15 (0.06, 0.25)   | 0.09 | 0.09 |
| Zimbabwe      | SHINE (HIV+) (48) | 171         | 156          | 0.06                                                | -0.16 (-0.42, 0.09) | 0.01 | 0.02       |             |  | 157              | 166         | -0.03                                               | -0.11 (-0.38, 0.15) | 0.01 | 0.02 |
|               |                   | <b>8791</b> | <b>9971</b>  |                                                     |                     |      |            |             |  | <b>8026</b>      | <b>9236</b> |                                                     |                     |      |      |
|               |                   |             |              | <b>I<sup>2</sup> = 0.23, Tau<sup>2</sup> = 0.00</b> |                     |      |            |             |  |                  |             | <b>I<sup>2</sup> = 0.27, Tau<sup>2</sup> = 0.00</b> |                     |      |      |
| <b>Fixed</b>  |                   |             |              | <b>0.08 (0.05, 0.11)</b>                            |                     |      |            |             |  |                  |             | <b>0.10 (0.07, 0.12)</b>                            |                     |      |      |
| <b>Random</b> |                   |             |              | <b>0.07 (0.03, 0.11)</b>                            |                     |      |            |             |  |                  |             | <b>0.09 (0.05, 0.13)</b>                            |                     |      |      |

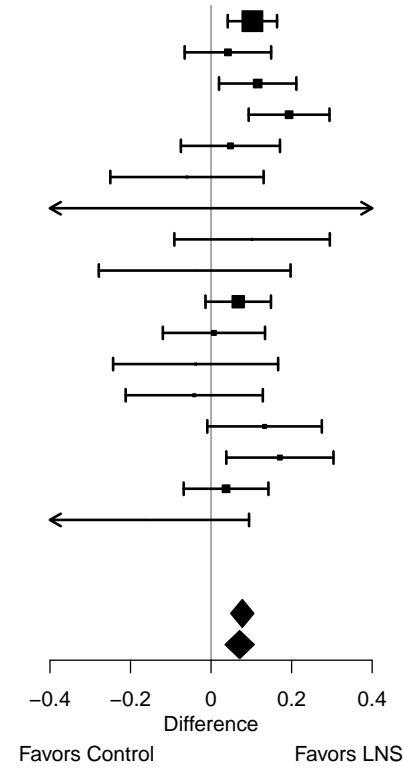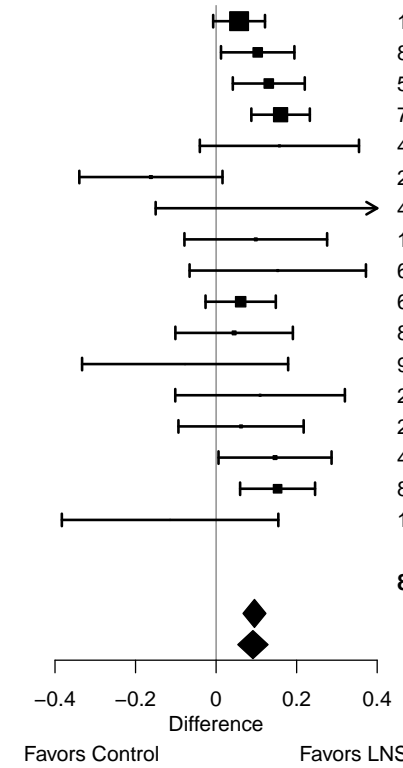

Supplemental figure 7D: Mean difference in WLZ

7D2: Stratified by Household food insecurity

P-for-interaction = 0.813

Difference in MDs = 0.01 (-0.04, 0.05)

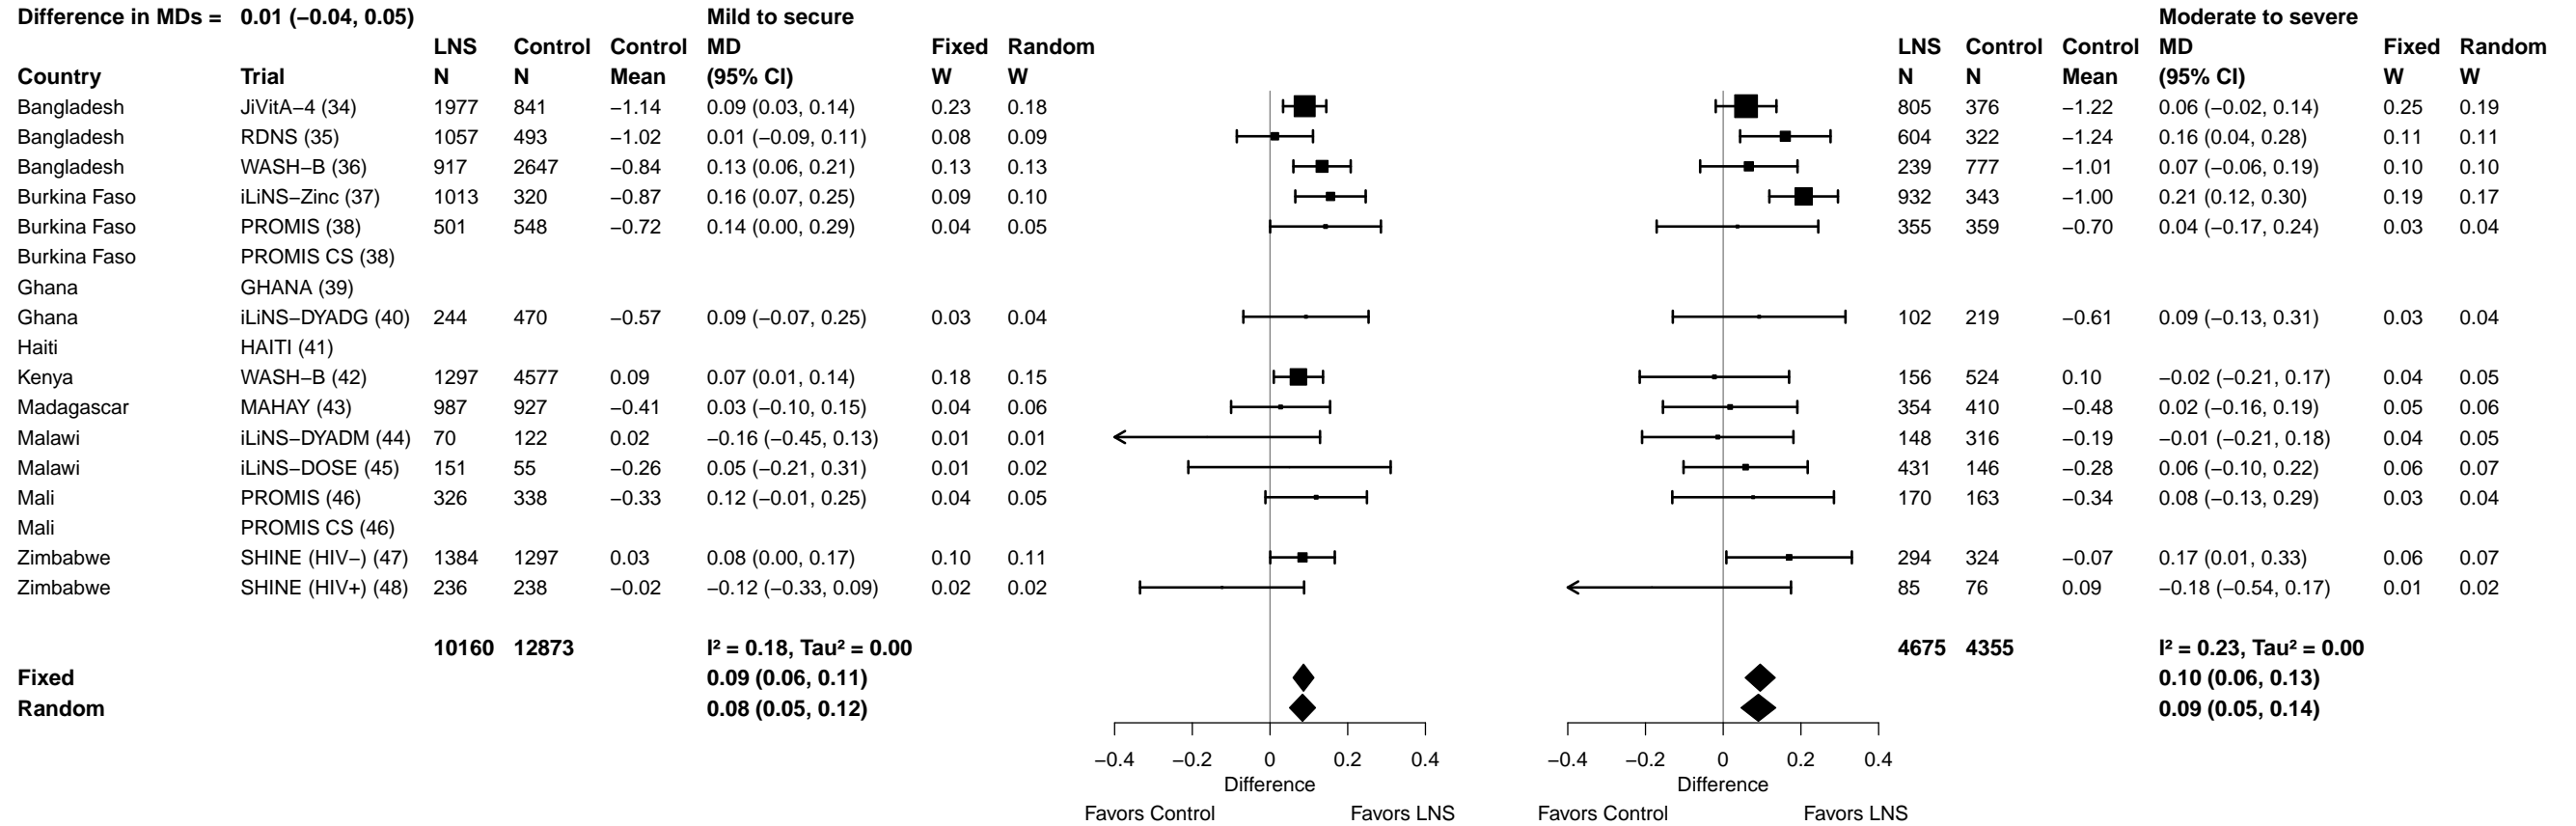

Supplemental figure 7D: Mean difference in WLZ

7D3: Stratified by Household source water quality

P-for-interaction = 0.860

Difference in MDs = 0.01 (-0.05, 0.07)

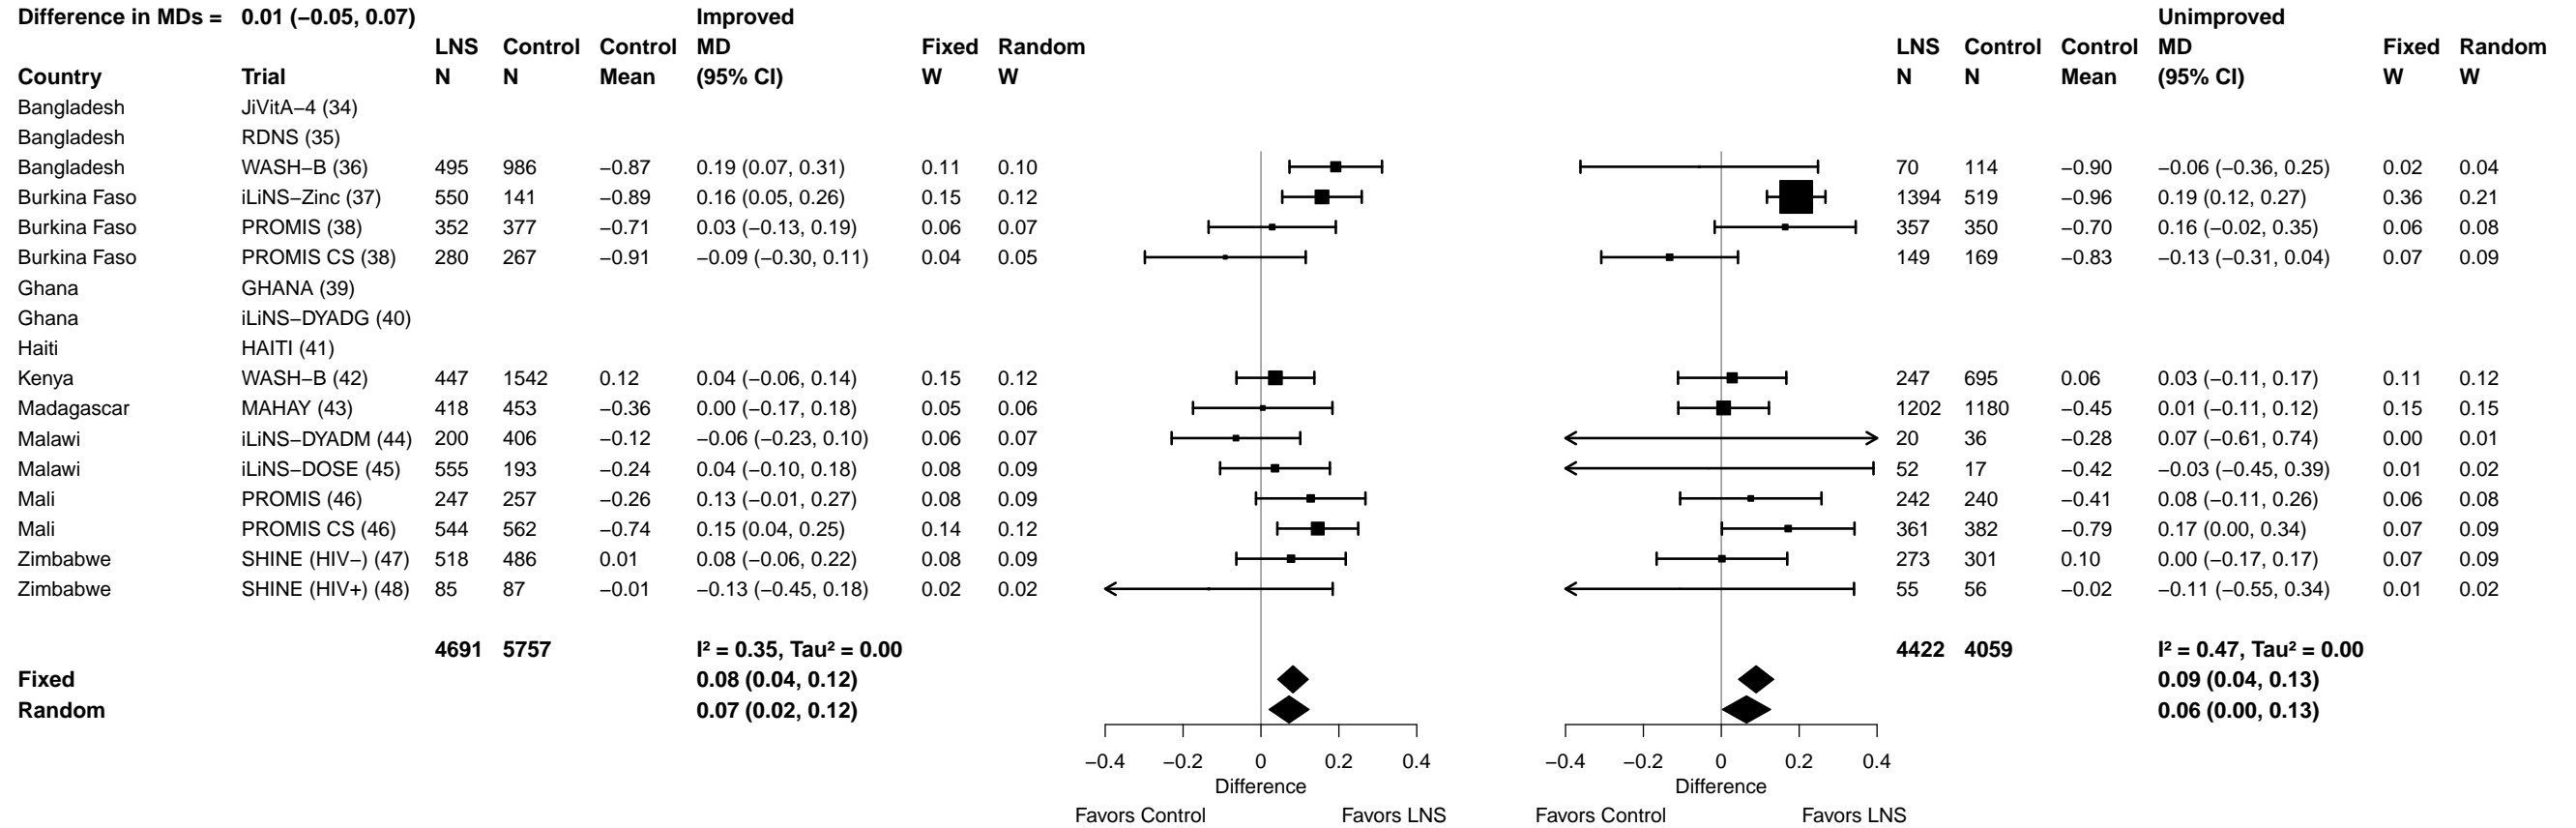

Supplemental figure 7D: Mean difference in WLZ

7D4: Stratified by Household sanitation

P-for-interaction = 0.062

Difference in MDs = -0.05 (-0.11, 0.00)

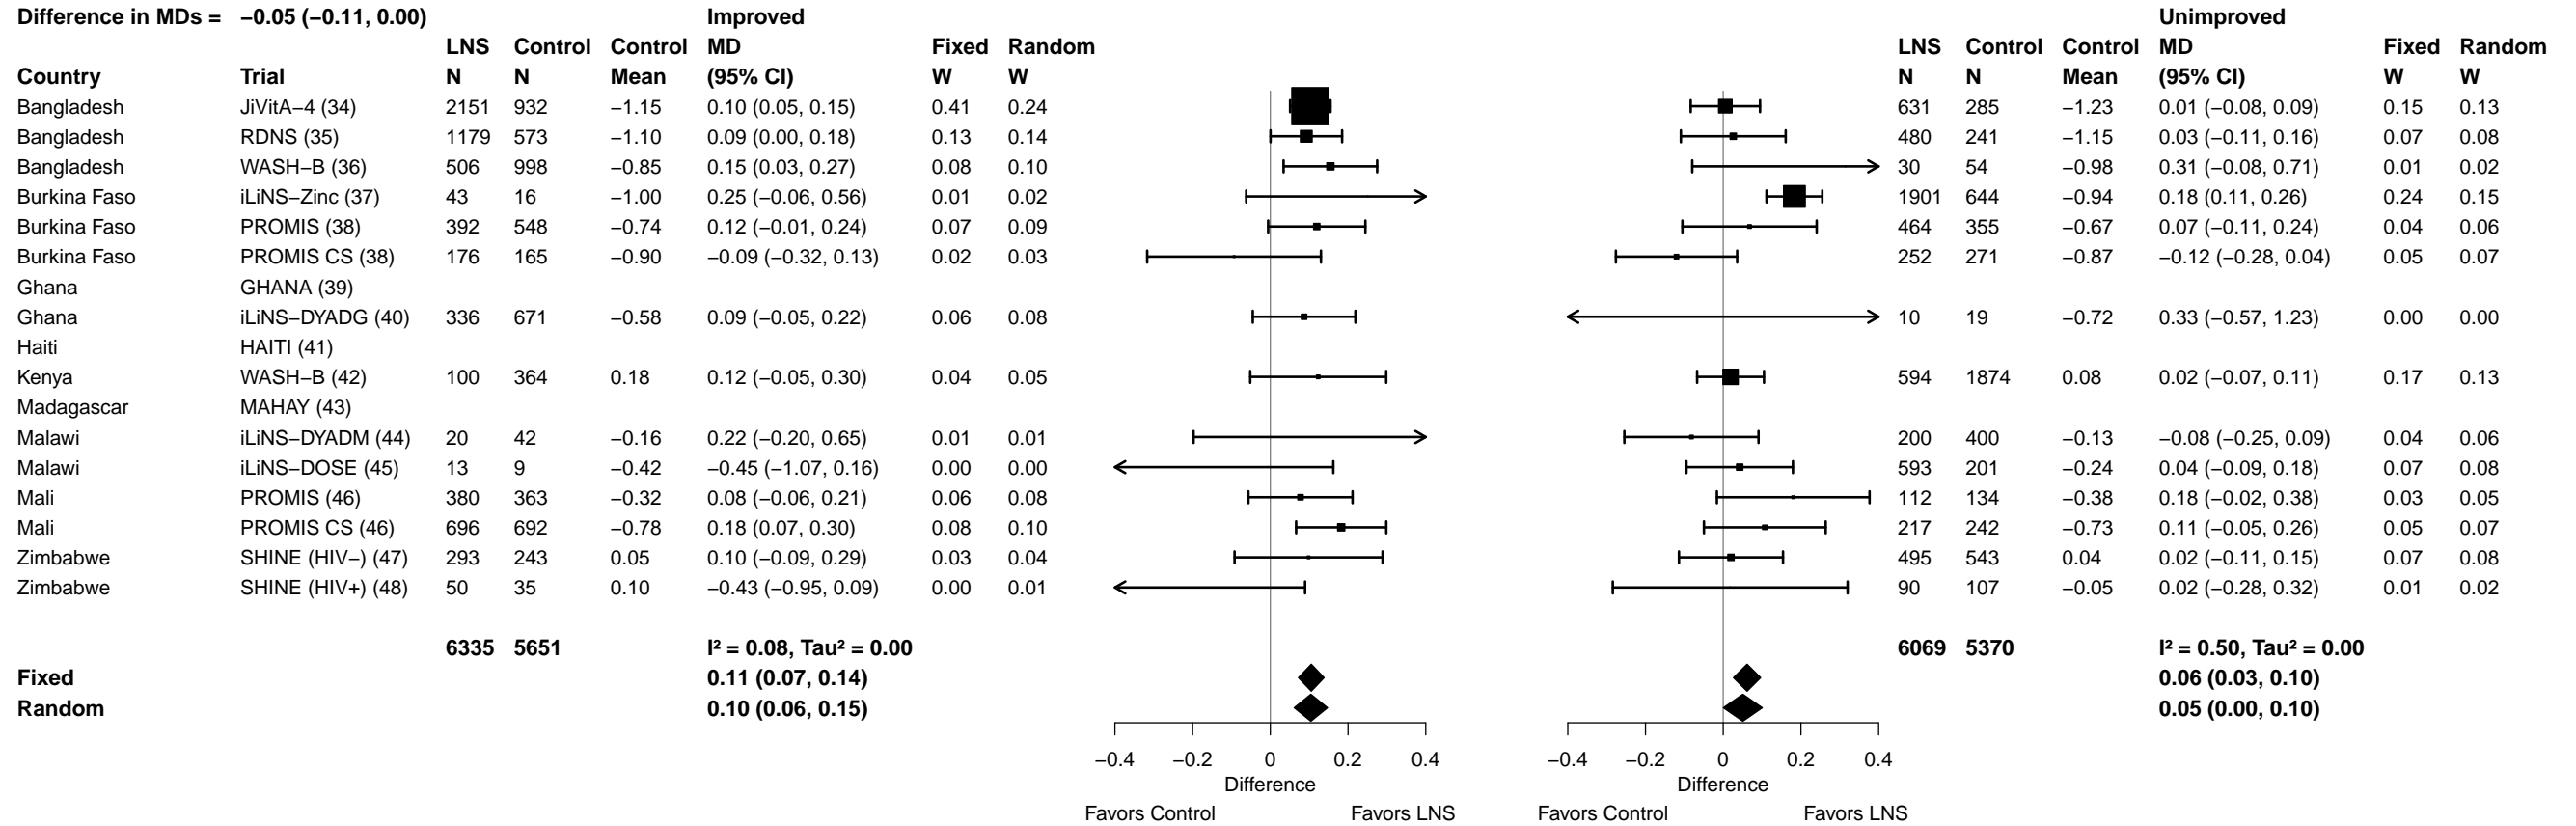

Supplemental figure 7D: Mean difference in WLZ

7D5: Stratified by Home environment

**P-for-interaction = 0.043**  
**Difference in MDs = 0.06 (0.00, 0.11)**

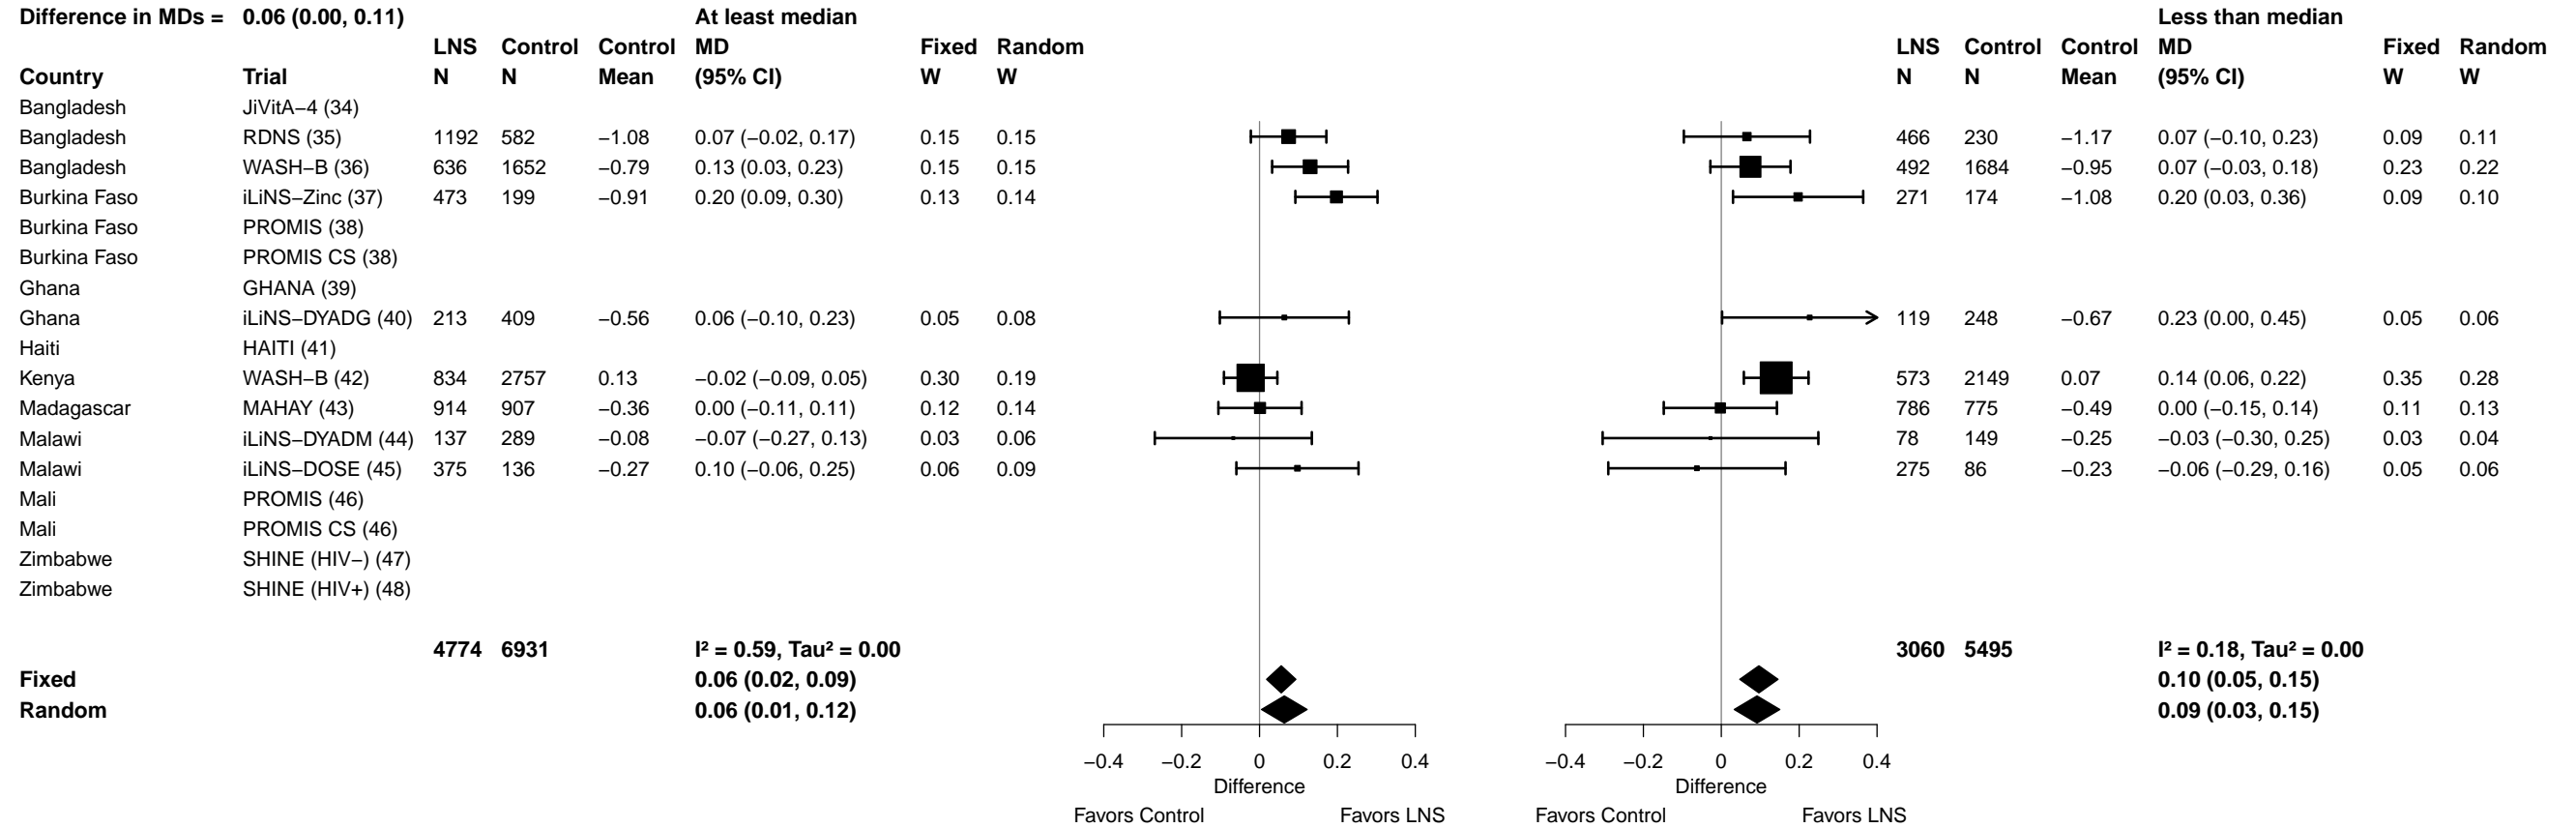

Supplemental figure 7D: Mean difference in WLZ

7D6: Stratified by Season at the time of assessment

P-for-interaction = 0.197

Difference in MDs = -0.03 (-0.08, 0.02)

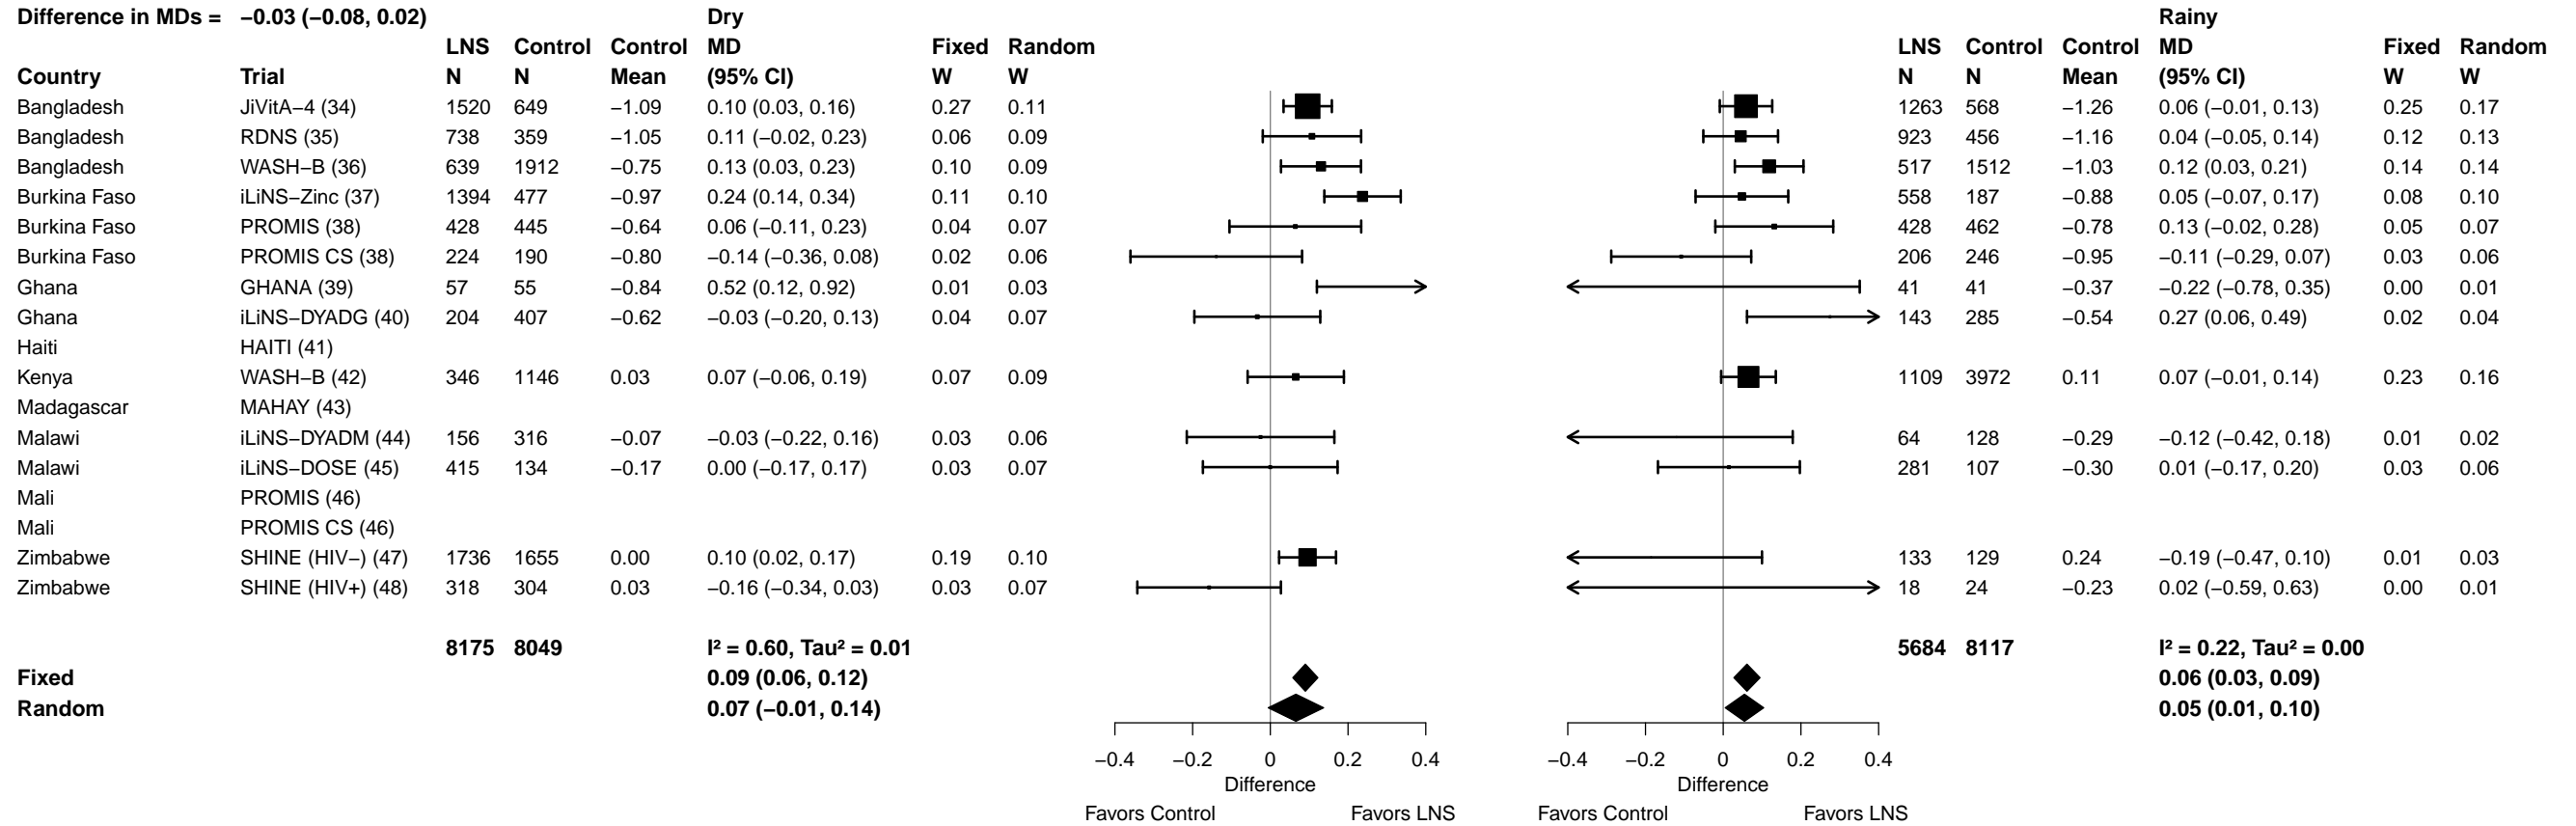

### Supplemental figure 7E: Wasting prevalence ratio

#### 7E1: Stratified by Household socio-economic status

**P-for-interaction = 0.492**  
**Ratio of PRs = 1.06 (0.90, 1.24)**

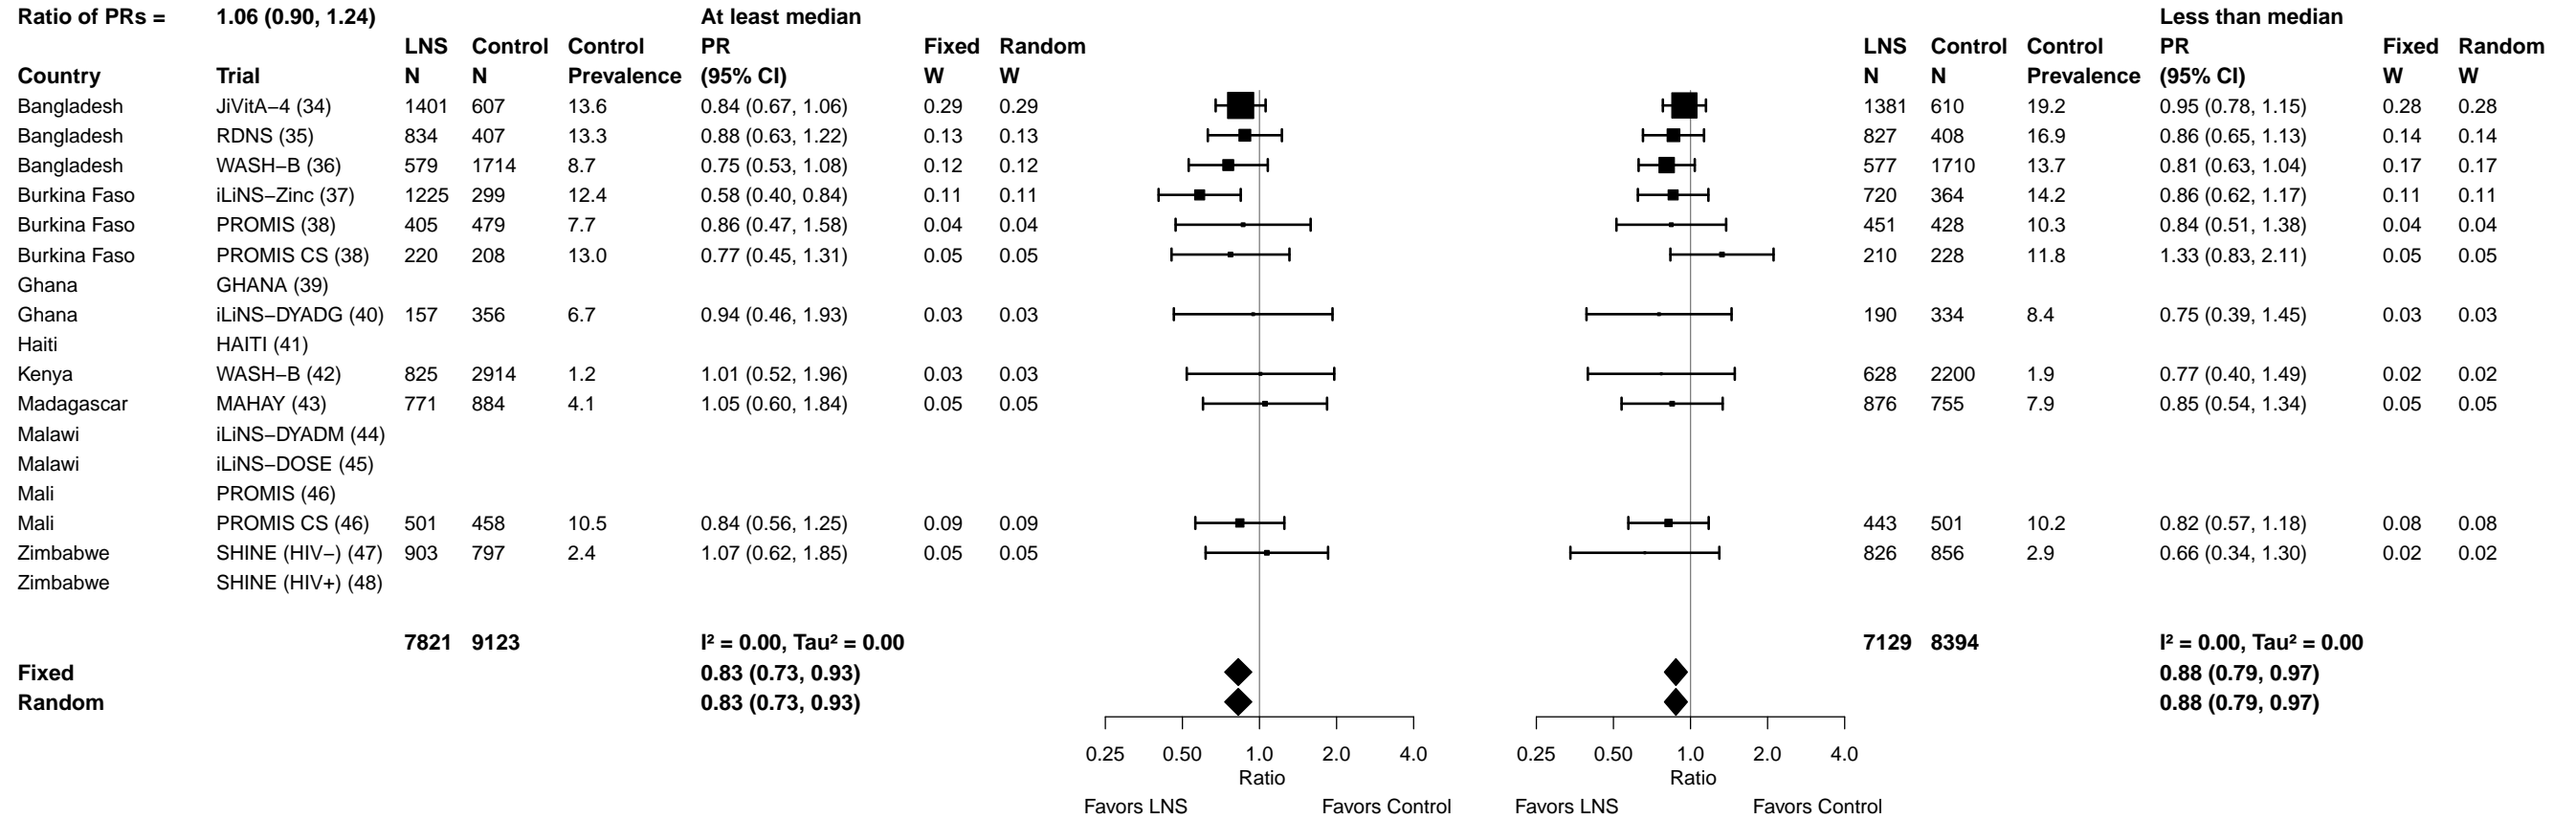

Supplemental figure 7E: Wasting prevalence ratio

7E2: Stratified by Household food insecurity

P-for-interaction = 0.729

Ratio of PRs = 0.97 (0.81, 1.16)

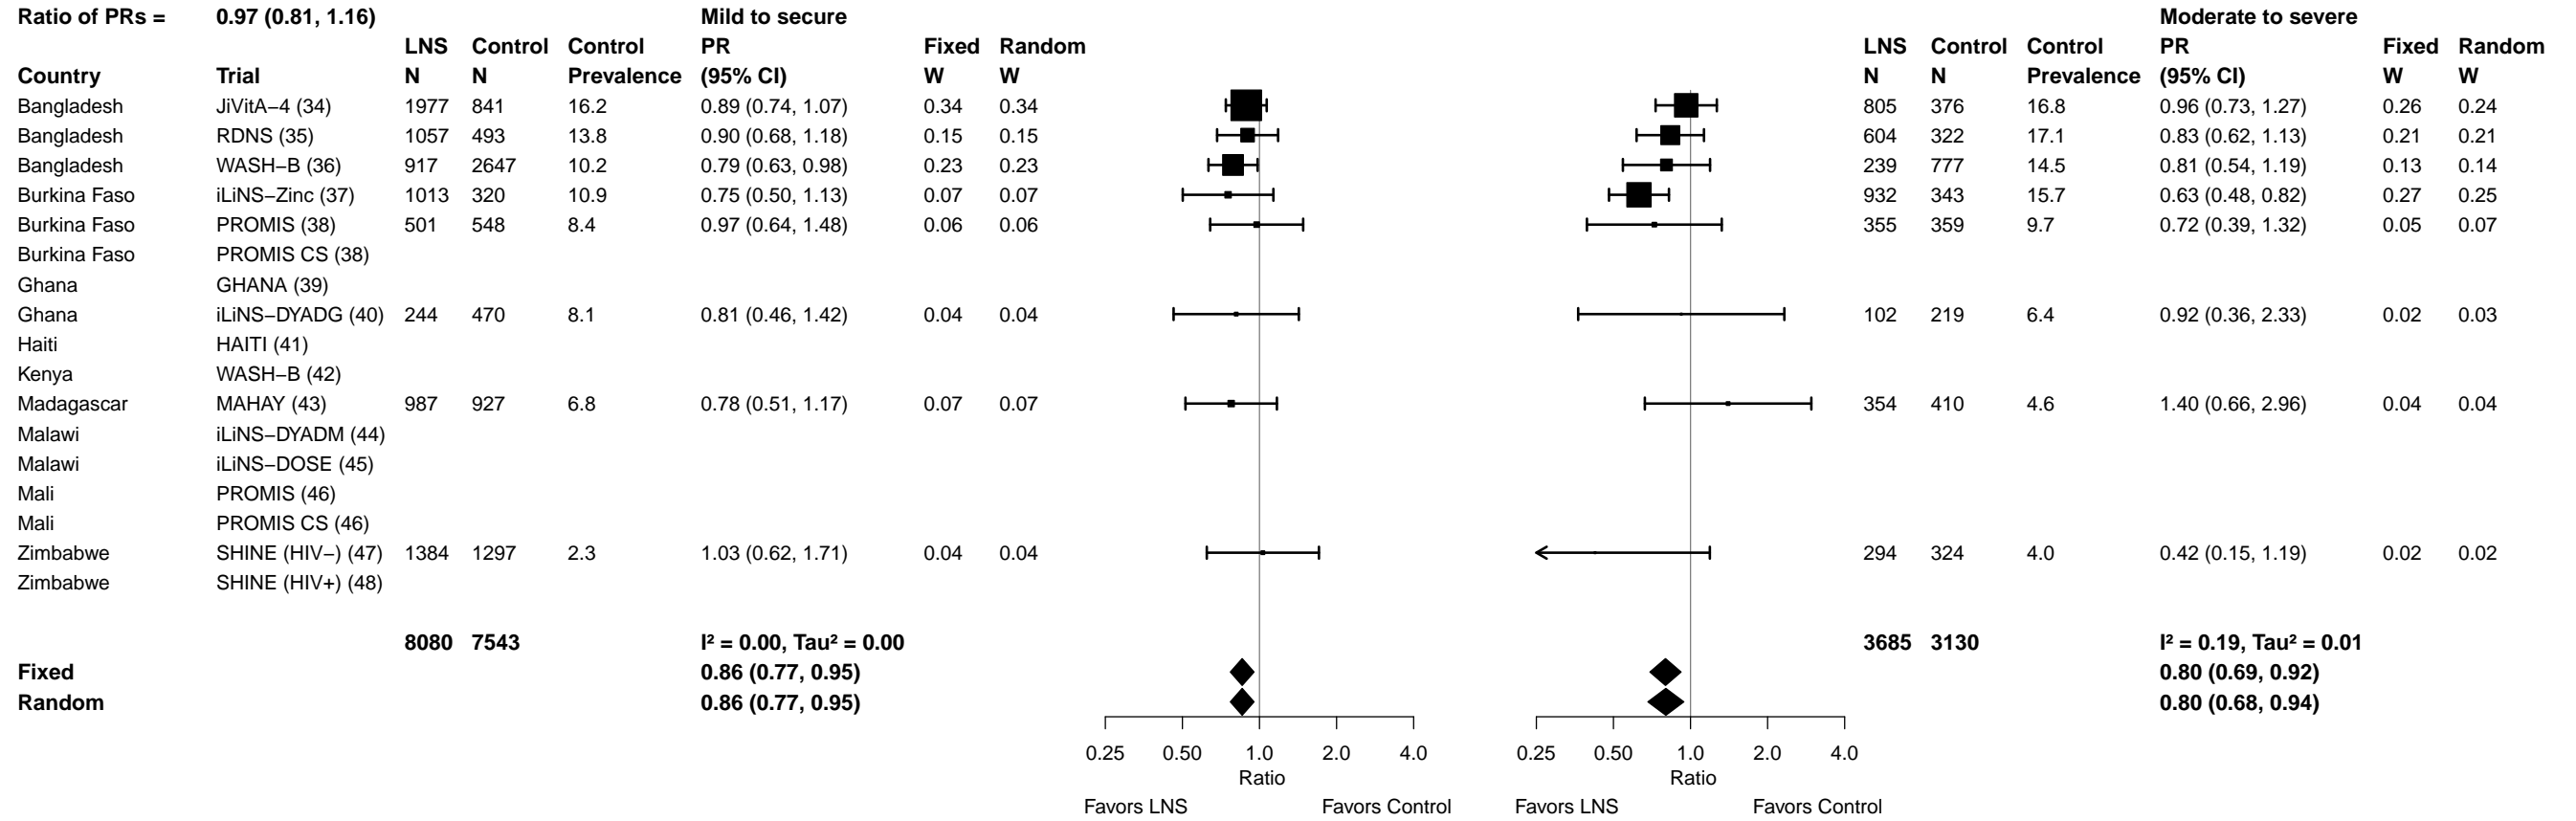



Supplemental figure 7E: Wasting prevalence ratio

7E3: Stratified by Household source water quality

P-for-interaction = 0.075

Ratio of PRs = 1.27 (0.98, 1.65)

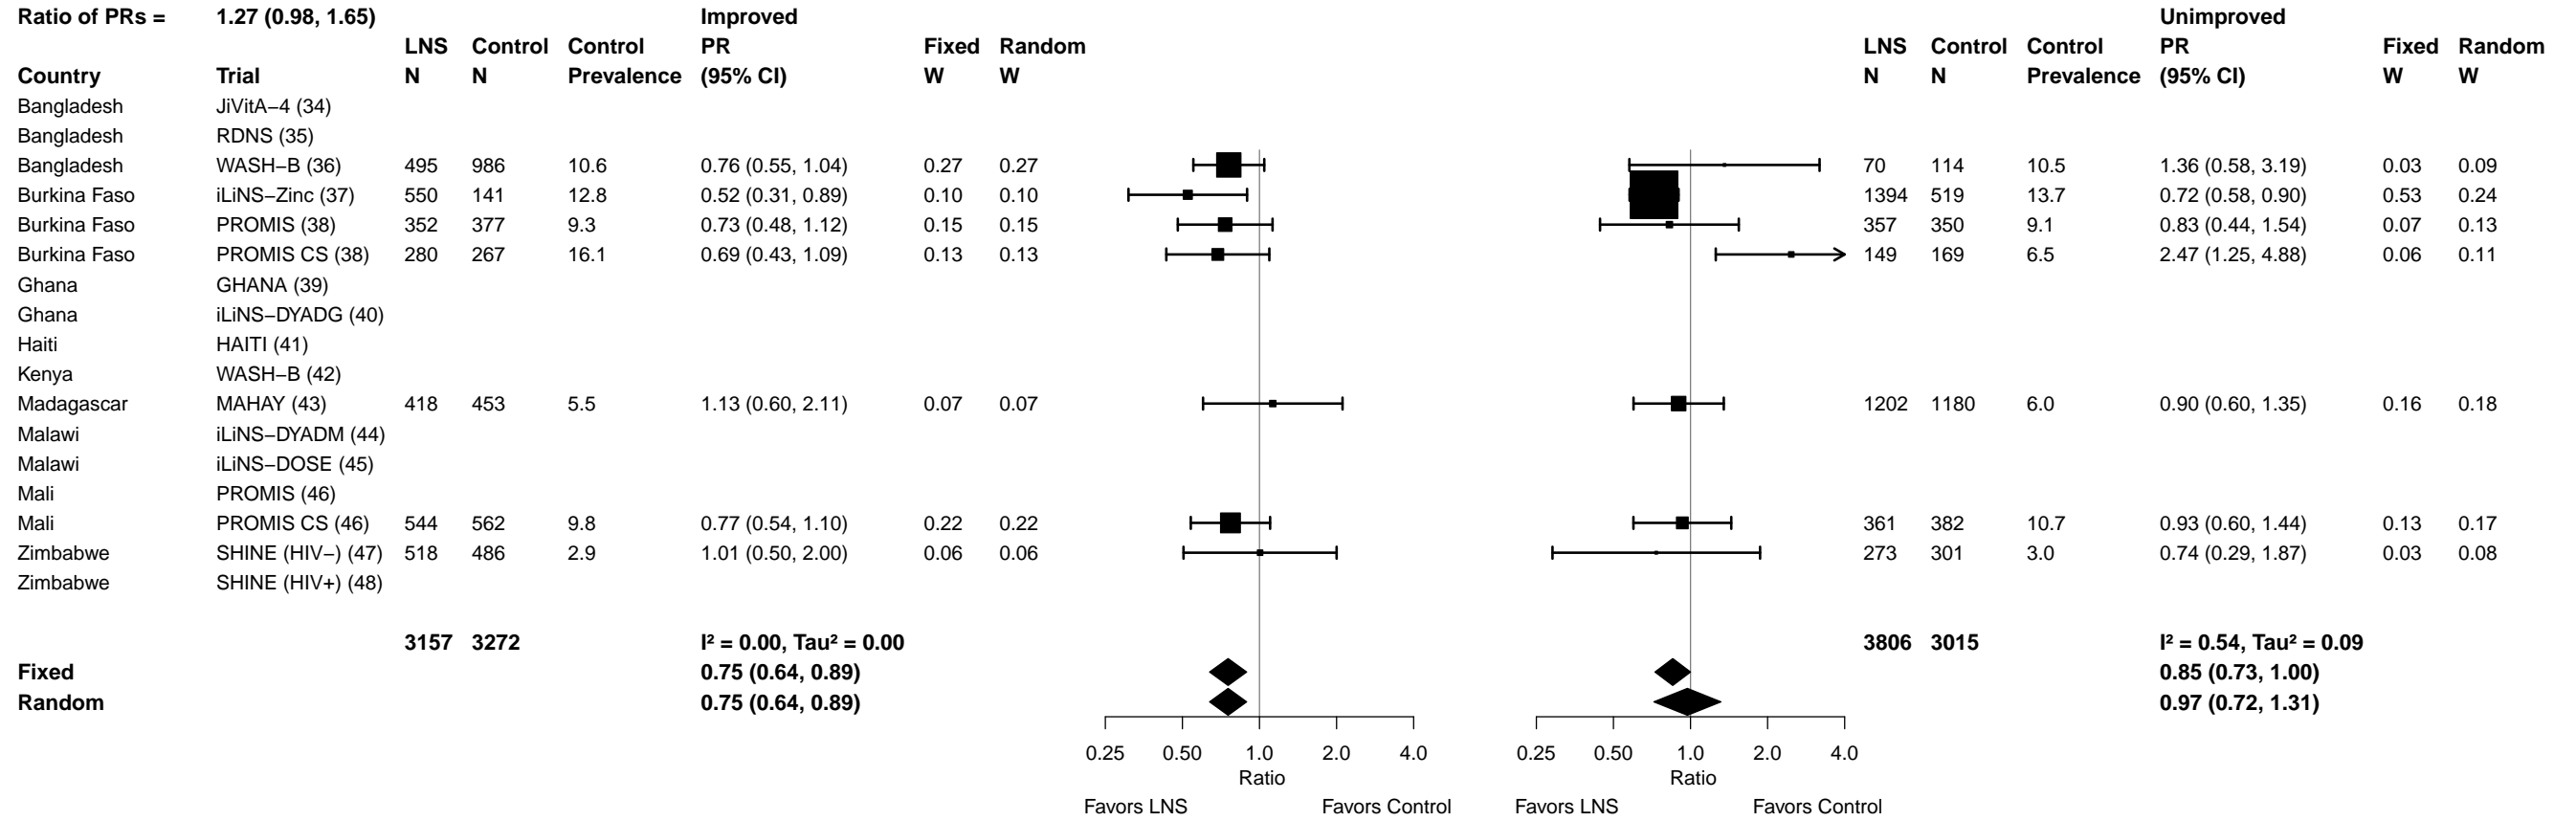

Supplemental figure 7E: Wasting prevalence ratio

7E4: Stratified by Household sanitation

P-for-interaction = 0.080

Ratio of PRs = 1.20 (0.98, 1.48)

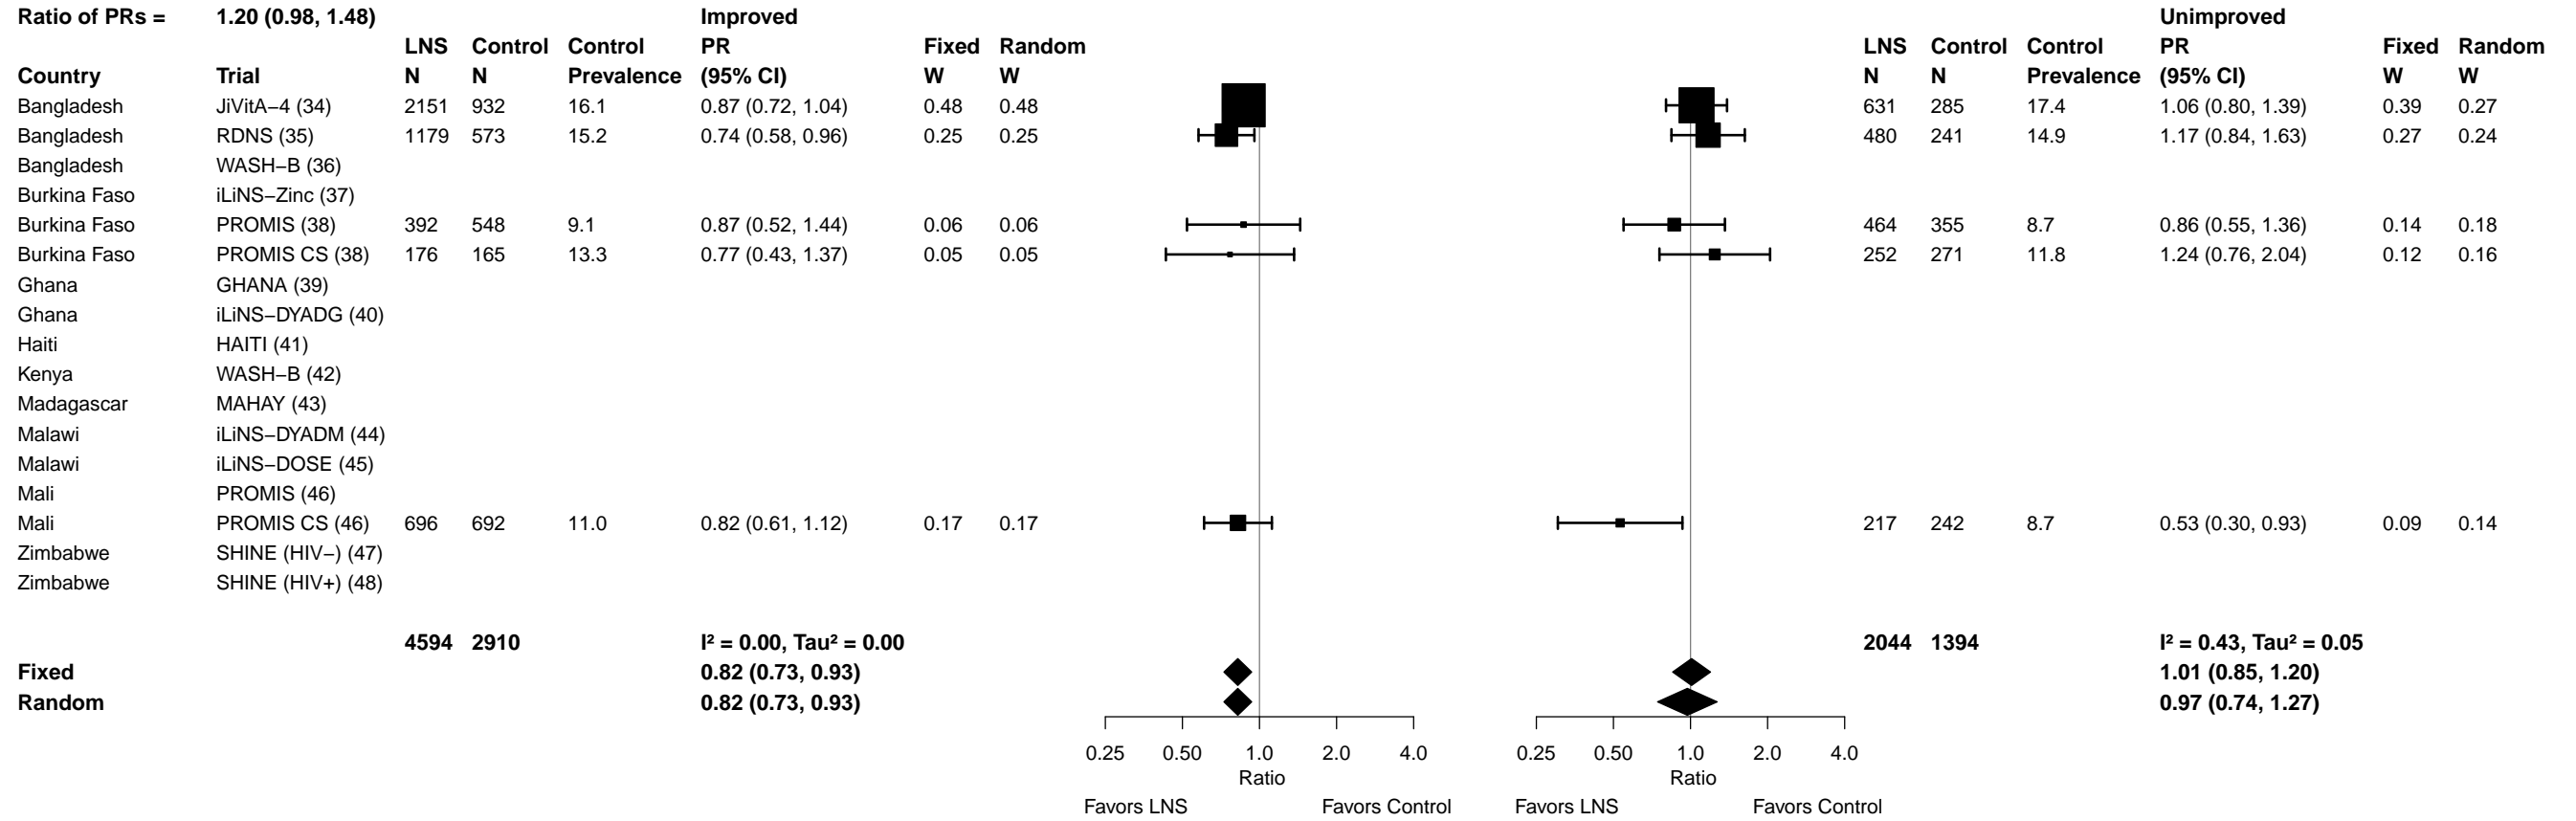

Supplemental figure 7E: Wasting prevalence ratio

7E5: Stratified by Home environment

P-for-interaction = 0.478

Ratio of PRs = 1.09 (0.86, 1.37)

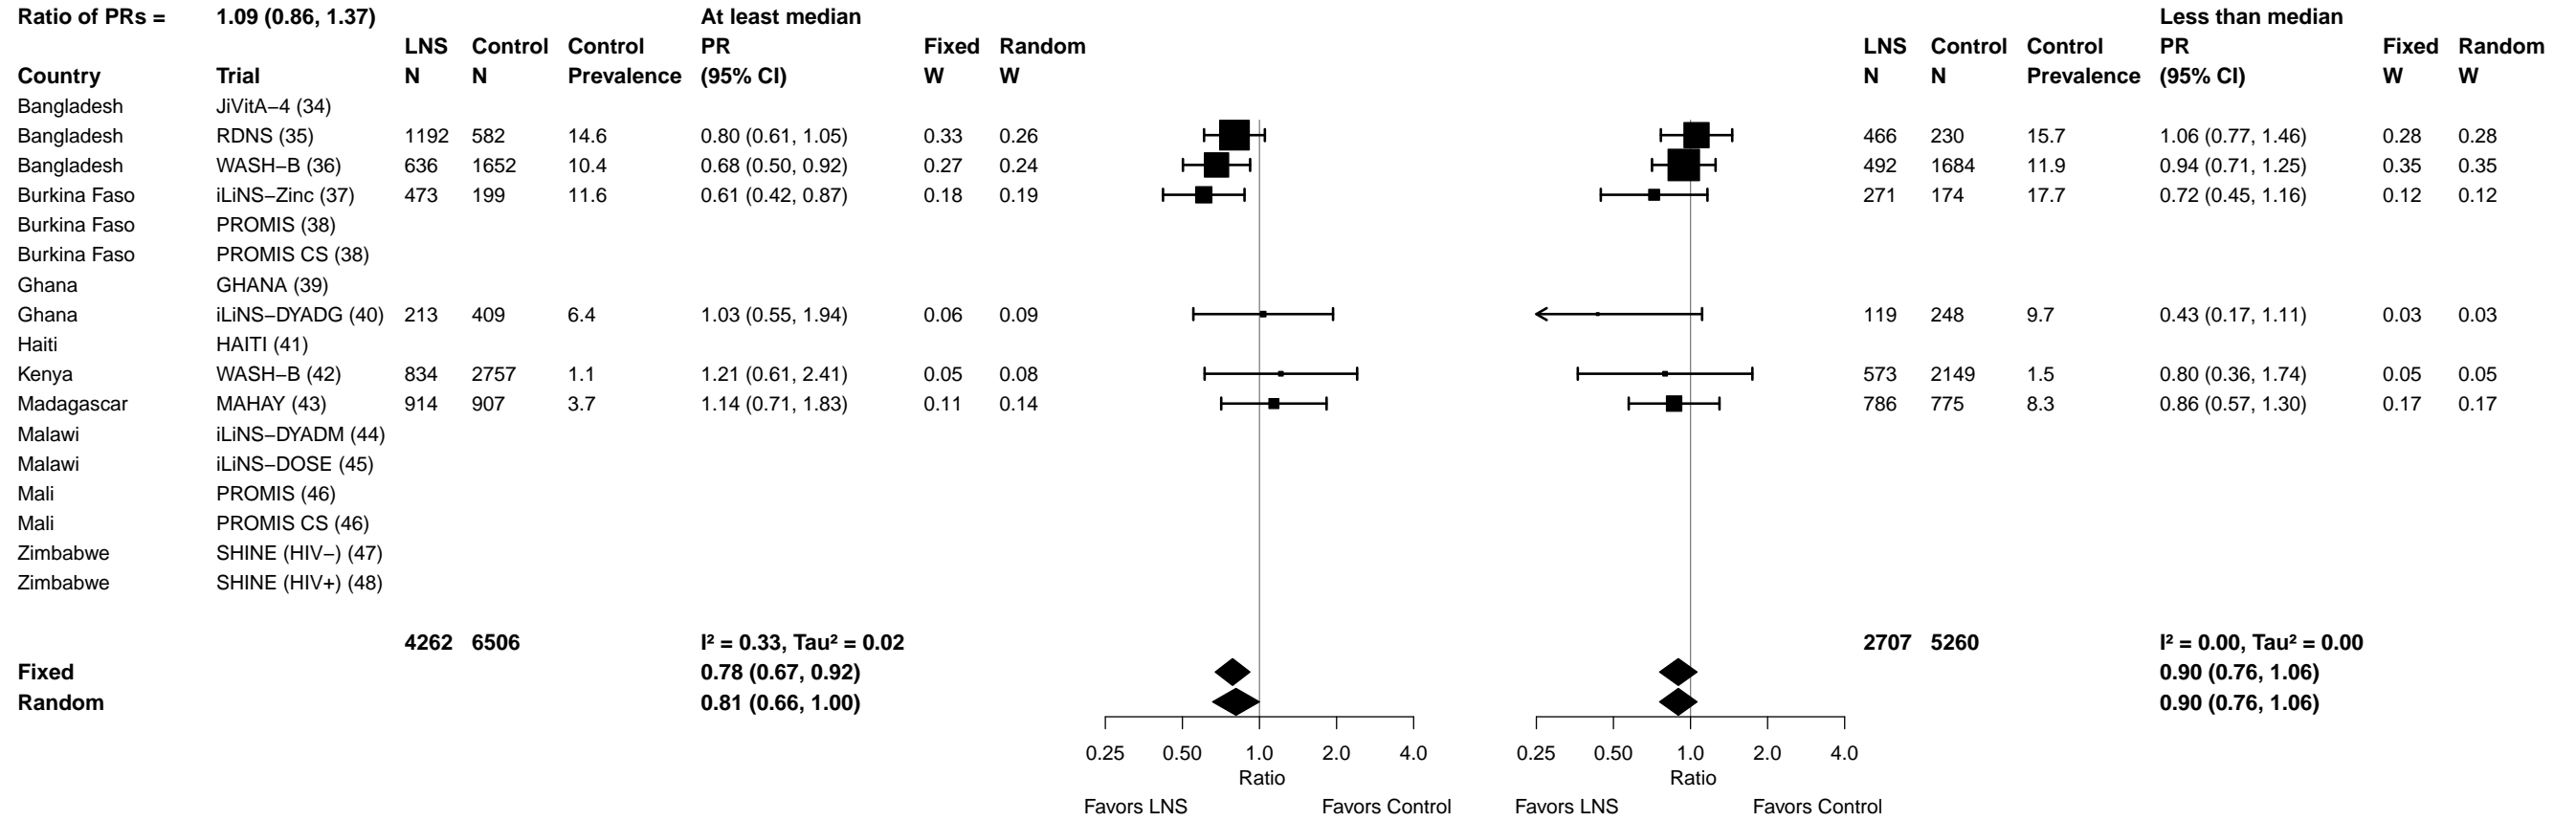

Supplemental figure 7E: Wasting prevalence ratio

7E6: Stratified by Season at the time of assessment

P-for-interaction = 0.088

Ratio of PRs = 1.16 (0.98, 1.39)

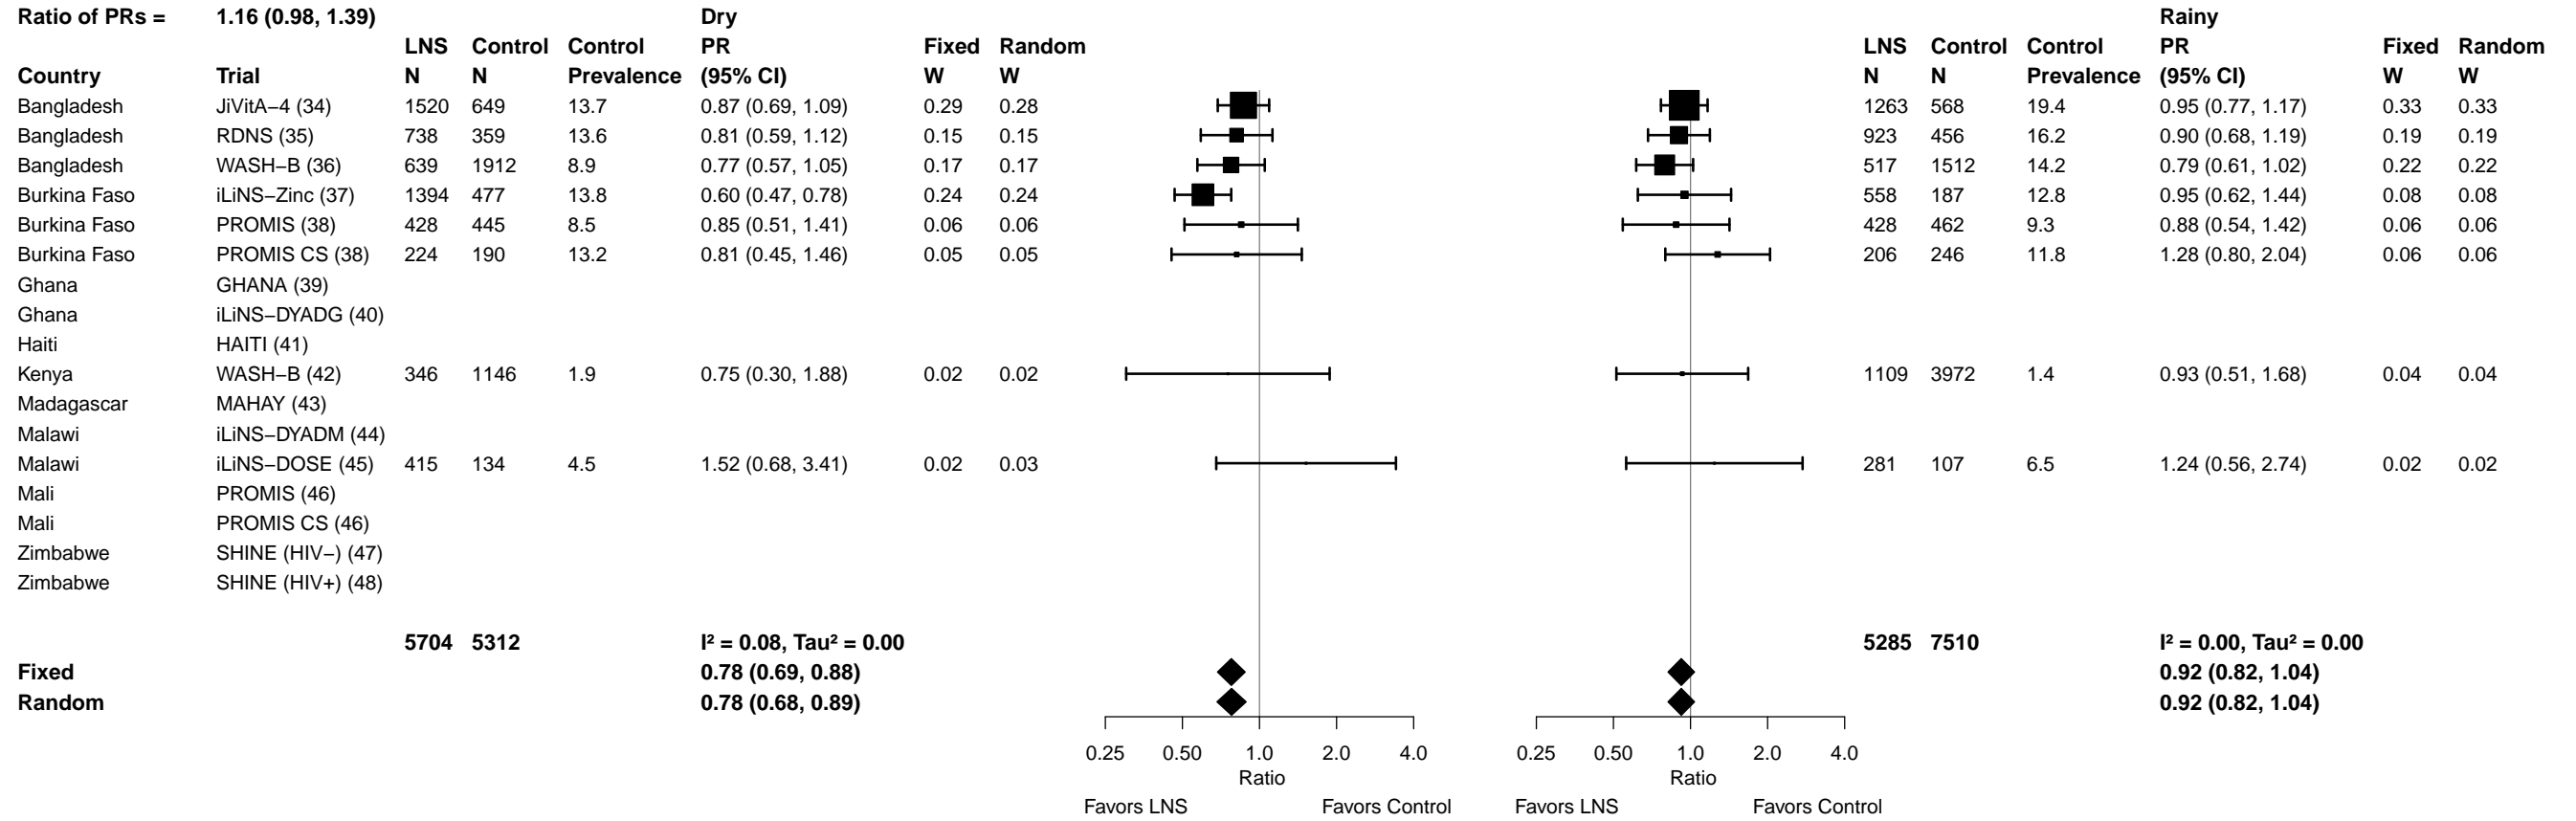

### Supplemental figure 7F: Wasting prevalence difference

#### 7F1: Stratified by Household socio-economic status

P-for-interaction = 0.223

Difference in PDs = -0.01 (-0.02, 0.00)

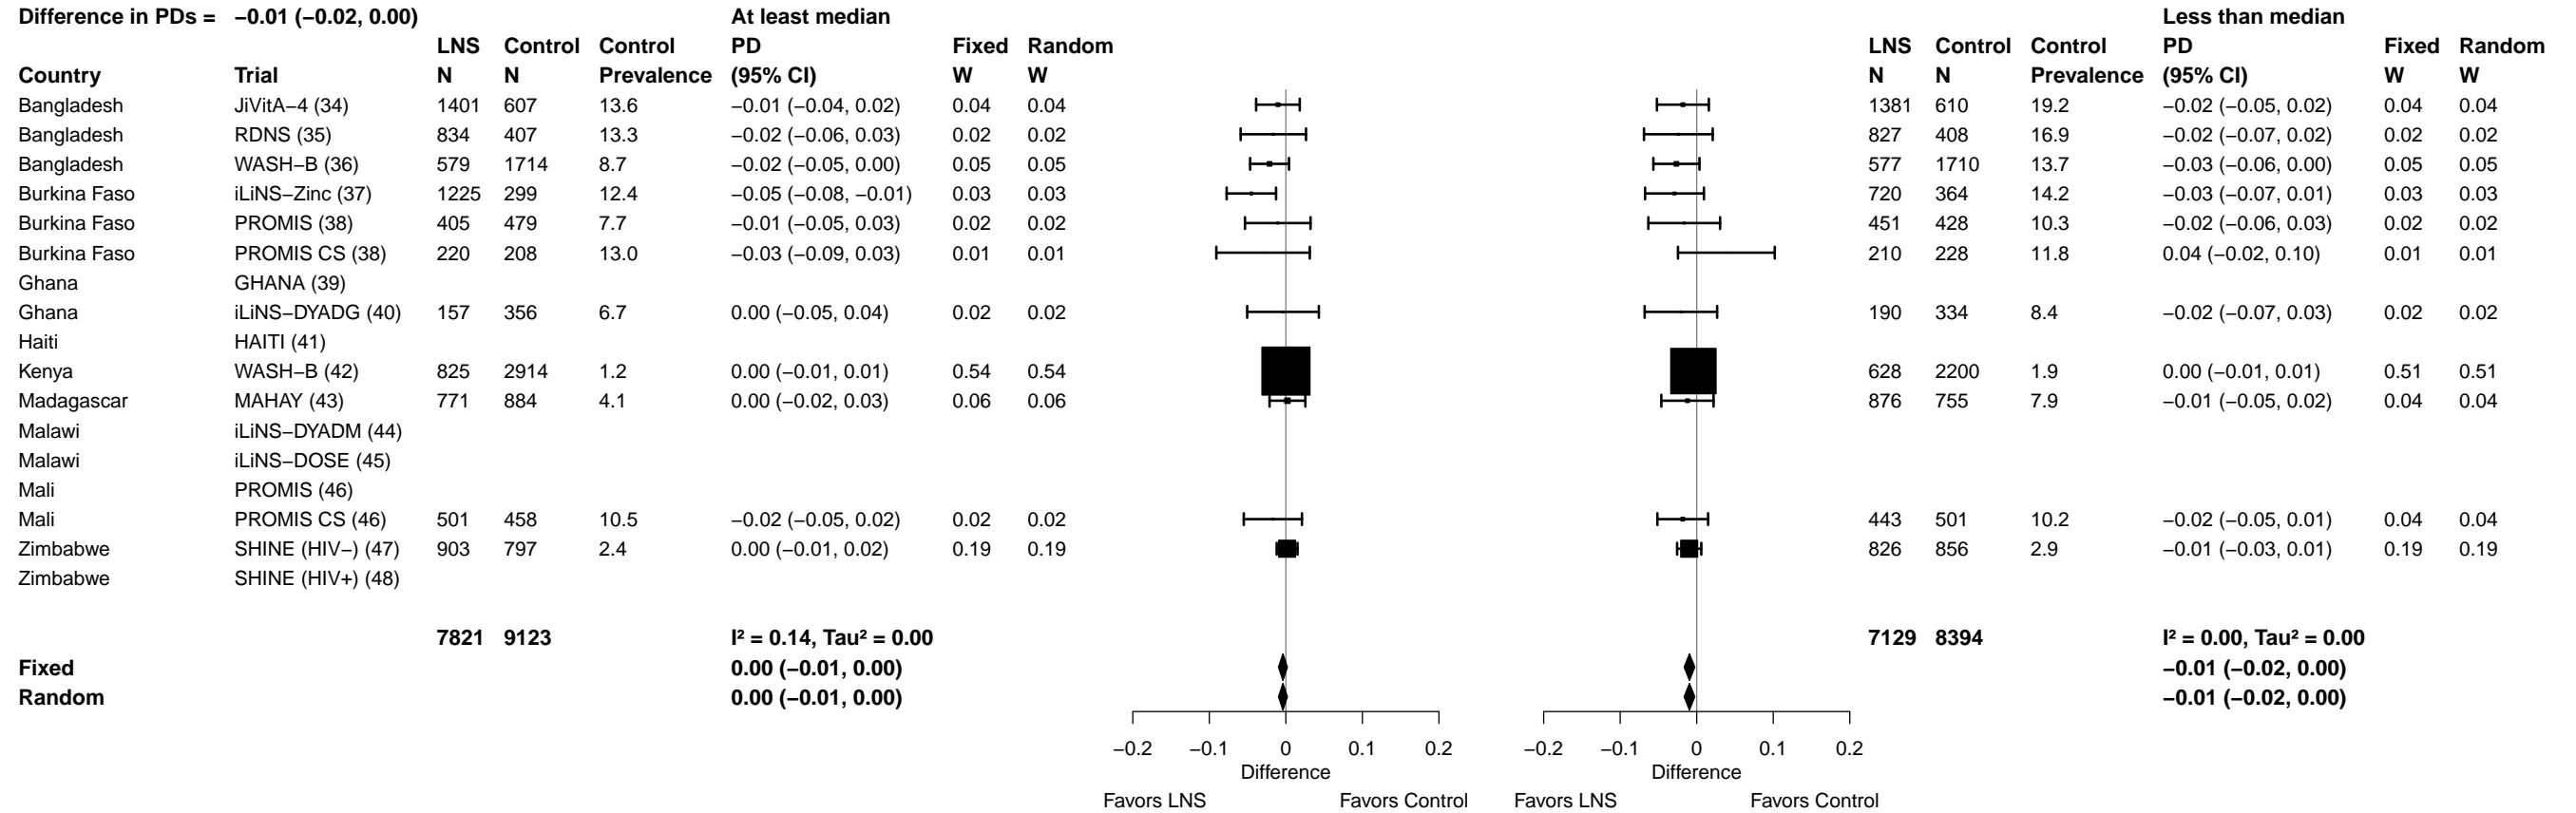

Supplemental figure 7F: Wasting prevalence difference

7F2: Stratified by Household food insecurity

P-for-interaction = 0.433

Difference in PDs = -0.01 (-0.02, 0.01)

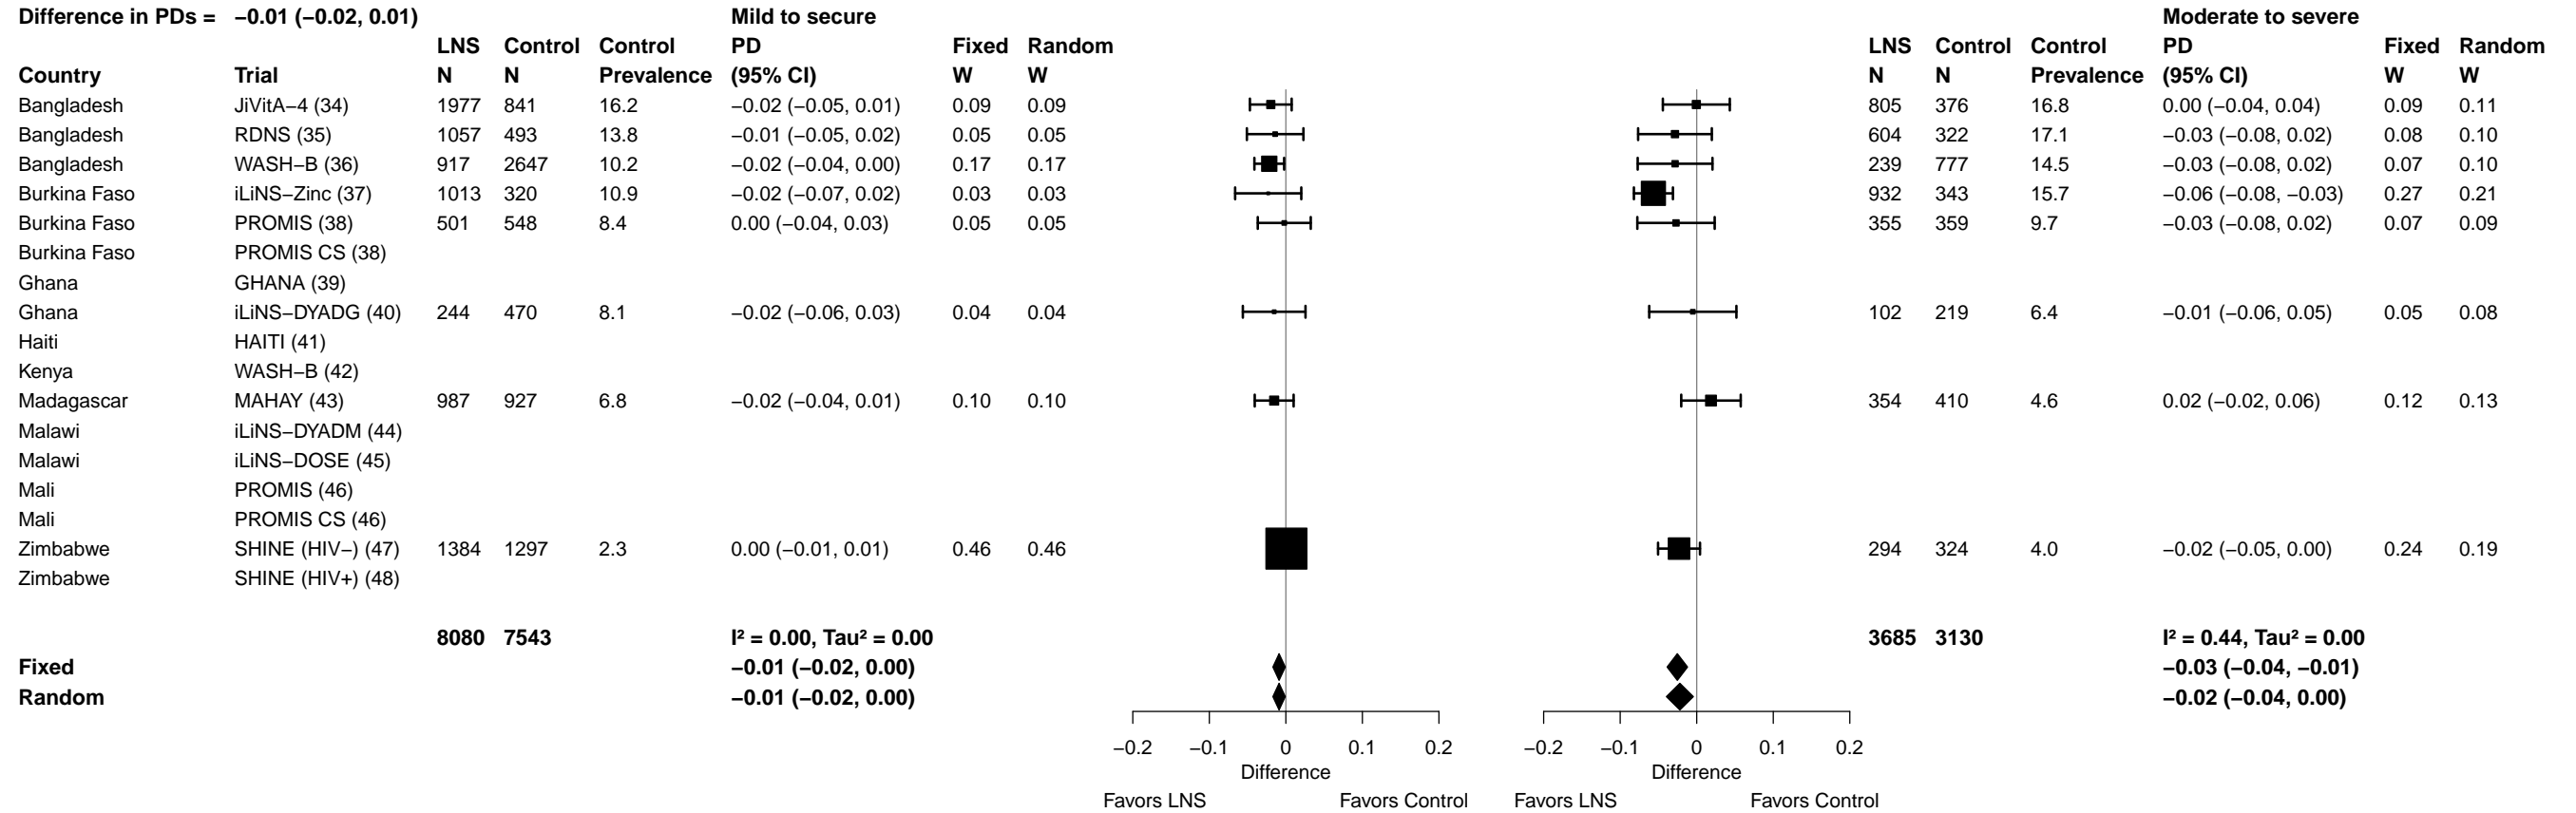

Supplemental figure 7F: Wasting prevalence difference

7F3: Stratified by Household source water quality

P-for-interaction = 0.612

Difference in PDs = 0.00 (-0.01, 0.02)

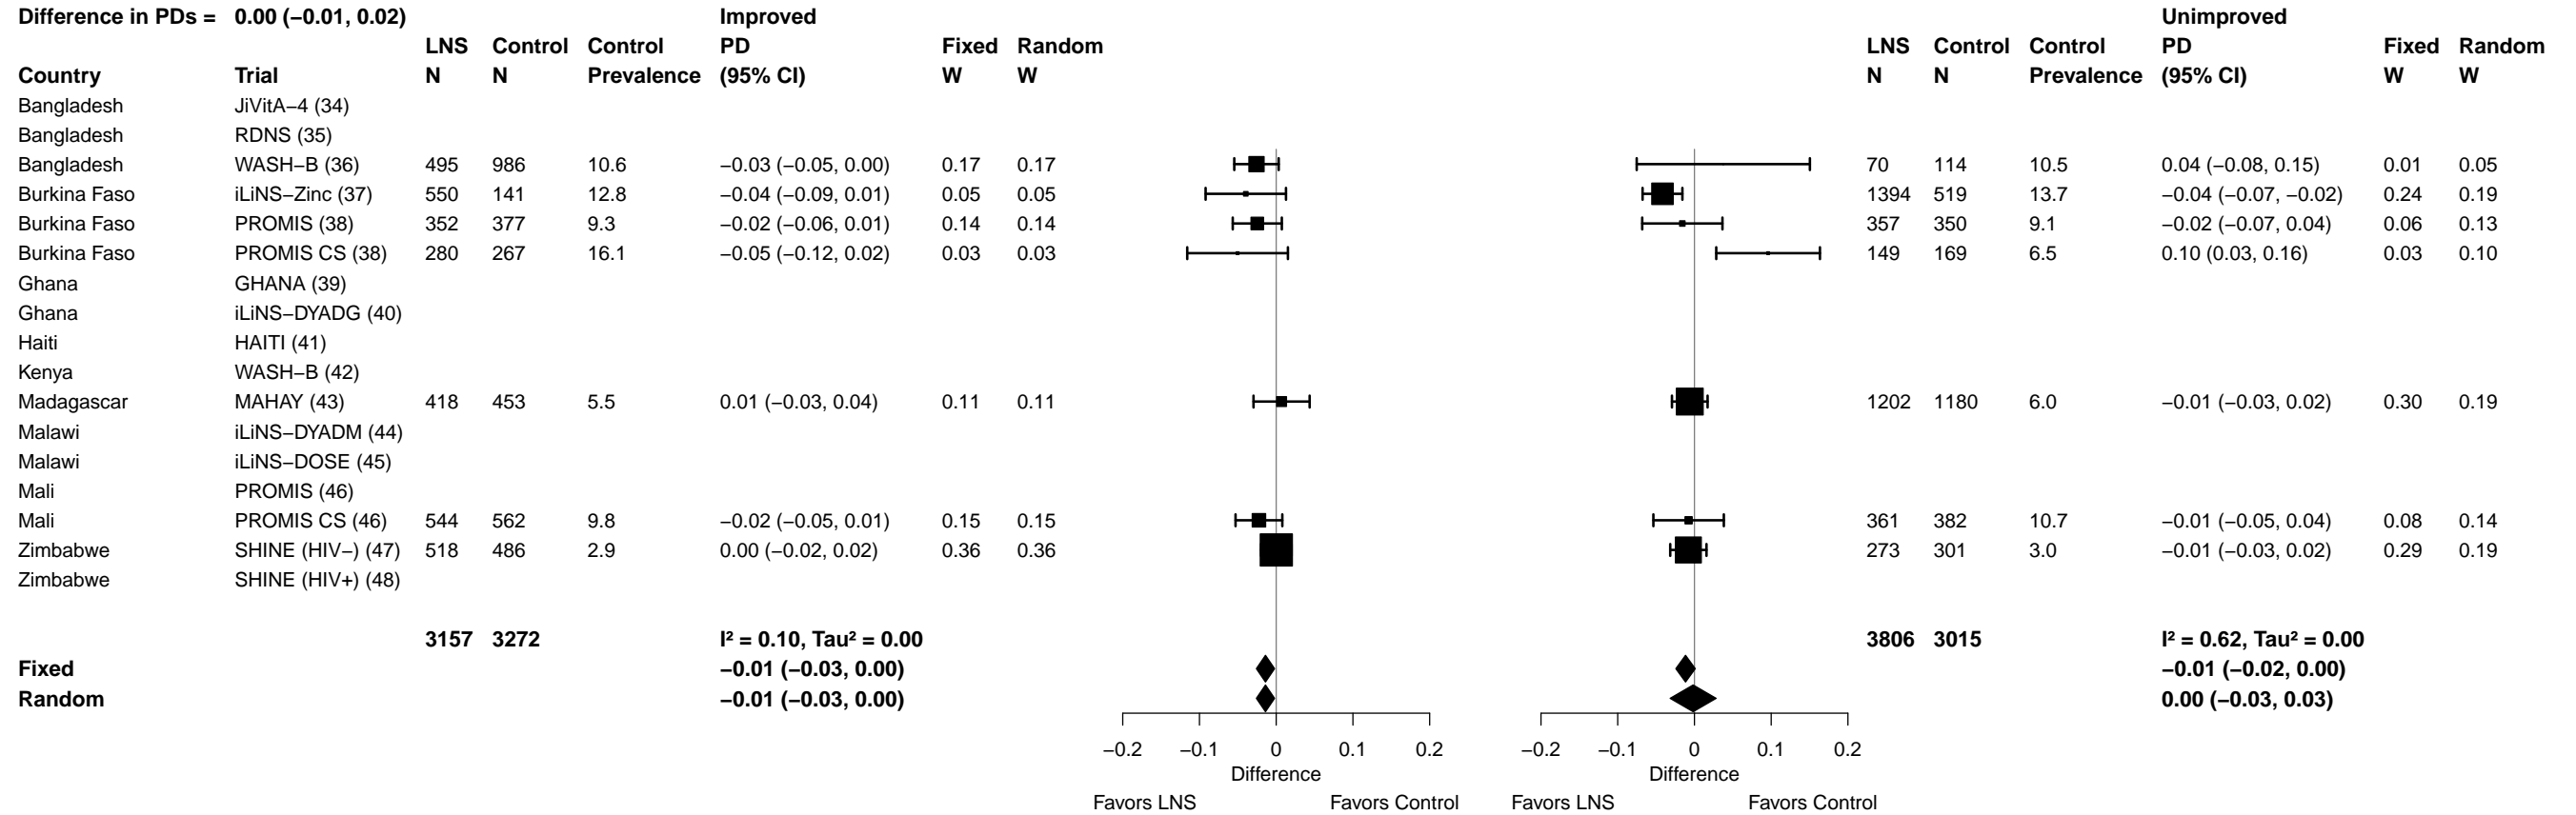

Supplemental figure 7F: Wasting prevalence difference

7F4: Stratified by Household sanitation

P-for-interaction = 0.134

Difference in PDs = 0.02 (-0.01, 0.05)

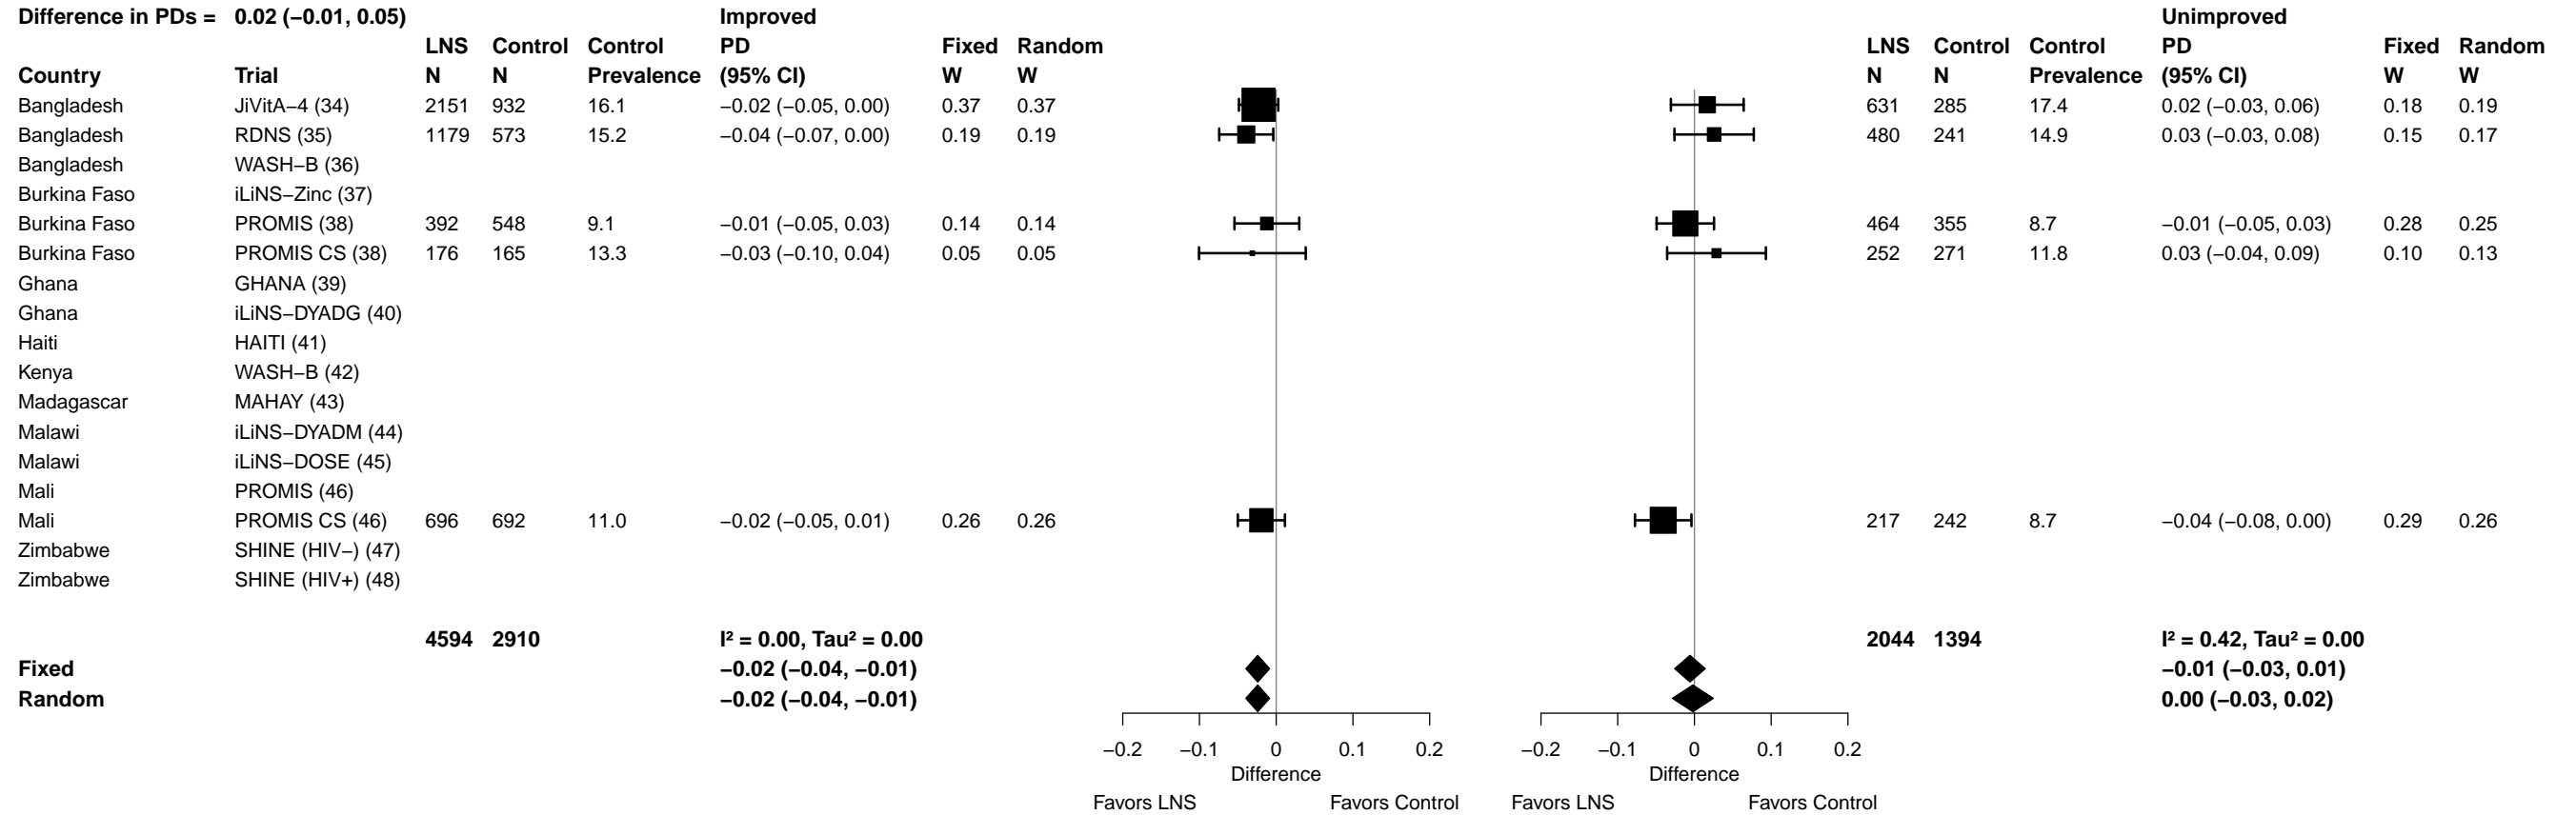







### Supplemental figure 7G: Mean difference in MUACZ

#### 7G1: Stratified by Household socio-economic status

P-for-interaction = 0.768

Difference in MDs = 0.01 (-0.03, 0.04)

| Country       | Trial             | LNS<br>N    | Control<br>N | Control<br>Mean                                     | At least median     |      | Fixed<br>W | Random<br>W |  | Less than median |             | Fixed<br>W                                          | Random<br>W         |      |      |
|---------------|-------------------|-------------|--------------|-----------------------------------------------------|---------------------|------|------------|-------------|--|------------------|-------------|-----------------------------------------------------|---------------------|------|------|
|               |                   |             |              |                                                     | MD<br>(95% CI)      |      |            |             |  | MD<br>(95% CI)   |             |                                                     |                     |      |      |
| Bangladesh    | JiVitA-4 (34)     | 1463        | 641          | -0.95                                               | 0.09 (0.03, 0.15)   | 0.29 | 0.12       |             |  | 1433             | 630         | -1.18                                               | 0.07 (0.01, 0.13)   | 0.24 | 0.13 |
| Bangladesh    | RDNS (35)         | 834         | 407          | -0.60                                               | 0.05 (-0.06, 0.15)  | 0.09 | 0.09       |             |  | 829              | 408         | -0.80                                               | 0.03 (-0.07, 0.12)  | 0.11 | 0.10 |
| Bangladesh    | WASH-B (36)       |             |              |                                                     |                     |      |            |             |  |                  |             |                                                     |                     |      |      |
| Burkina Faso  | iLiNS-Zinc (37)   | 1232        | 300          | -1.09                                               | 0.30 (0.18, 0.42)   | 0.06 | 0.08       |             |  | 720              | 365         | -1.16                                               | 0.29 (0.20, 0.38)   | 0.11 | 0.10 |
| Burkina Faso  | PROMIS (38)       | 403         | 479          | -0.71                                               | 0.08 (-0.09, 0.25)  | 0.03 | 0.05       |             |  | 451              | 433         | -0.76                                               | 0.10 (-0.02, 0.22)  | 0.07 | 0.08 |
| Burkina Faso  | PROMIS CS (38)    | 219         | 207          | -0.82                                               | -0.06 (-0.26, 0.13) | 0.02 | 0.05       |             |  | 205              | 229         | -0.81                                               | -0.06 (-0.27, 0.15) | 0.02 | 0.04 |
| Ghana         | GHANA (39)        |             |              |                                                     |                     |      |            |             |  |                  |             |                                                     |                     |      |      |
| Ghana         | iLiNS-DYADG (40)  | 157         | 356          | -0.40                                               | 0.07 (-0.10, 0.25)  | 0.03 | 0.05       |             |  | 190              | 335         | -0.54                                               | 0.11 (-0.05, 0.27)  | 0.04 | 0.06 |
| Haiti         | HAITI (41)        |             |              |                                                     |                     |      |            |             |  |                  |             |                                                     |                     |      |      |
| Kenya         | WASH-B (42)       | 827         | 2949         | -0.39                                               | 0.14 (0.06, 0.22)   | 0.15 | 0.11       |             |  | 632              | 2232        | -0.55                                               | 0.09 (-0.01, 0.19)  | 0.10 | 0.10 |
| Madagascar    | MAHAY (43)        | 761         | 865          | -0.61                                               | -0.05 (-0.22, 0.12) | 0.03 | 0.06       |             |  | 866              | 750         | -0.87                                               | 0.02 (-0.12, 0.17)  | 0.05 | 0.07 |
| Malawi        | iLiNS-DYADM (44)  | 121         | 234          | 0.14                                                | -0.06 (-0.26, 0.15) | 0.02 | 0.04       |             |  | 99               | 209         | 0.00                                                | -0.02 (-0.27, 0.23) | 0.02 | 0.03 |
| Malawi        | iLiNS-DOSE (45)   | 303         | 104          | 0.18                                                | 0.05 (-0.11, 0.21)  | 0.03 | 0.06       |             |  | 292              | 102         | -0.06                                               | 0.00 (-0.17, 0.18)  | 0.03 | 0.05 |
| Mali          | PROMIS (46)       | 248         | 250          | -0.78                                               | 0.17 (0.02, 0.31)   | 0.04 | 0.07       |             |  | 246              | 246         | -0.76                                               | 0.19 (0.01, 0.37)   | 0.03 | 0.05 |
| Mali          | PROMIS CS (46)    | 505         | 463          | -0.86                                               | 0.16 (0.01, 0.31)   | 0.04 | 0.07       |             |  | 449              | 507         | -0.80                                               | 0.10 (-0.04, 0.24)  | 0.05 | 0.06 |
| Zimbabwe      | SHINE (HIV-) (47) | 905         | 797          | 0.11                                                | 0.00 (-0.09, 0.08)  | 0.13 | 0.10       |             |  | 827              | 852         | -0.11                                               | 0.15 (0.06, 0.24)   | 0.12 | 0.10 |
| Zimbabwe      | SHINE (HIV+) (48) | 171         | 156          | -0.14                                               | 0.02 (-0.17, 0.21)  | 0.02 | 0.05       |             |  | 158              | 166         | -0.23                                               | 0.04 (-0.17, 0.25)  | 0.02 | 0.04 |
|               |                   | <b>8149</b> | <b>8208</b>  |                                                     |                     |      |            |             |  | <b>7397</b>      | <b>7464</b> |                                                     |                     |      |      |
| <b>Fixed</b>  |                   |             |              | <b>I<sup>2</sup> = 0.54, Tau<sup>2</sup> = 0.00</b> |                     |      |            |             |  |                  |             | <b>I<sup>2</sup> = 0.52, Tau<sup>2</sup> = 0.00</b> |                     |      |      |
| <b>Random</b> |                   |             |              | <b>0.08 (0.05, 0.11)</b>                            |                     |      |            |             |  |                  |             | <b>0.10 (0.07, 0.13)</b>                            |                     |      |      |
|               |                   |             |              | <b>0.08 (0.03, 0.13)</b>                            |                     |      |            |             |  |                  |             | <b>0.10 (0.05, 0.14)</b>                            |                     |      |      |

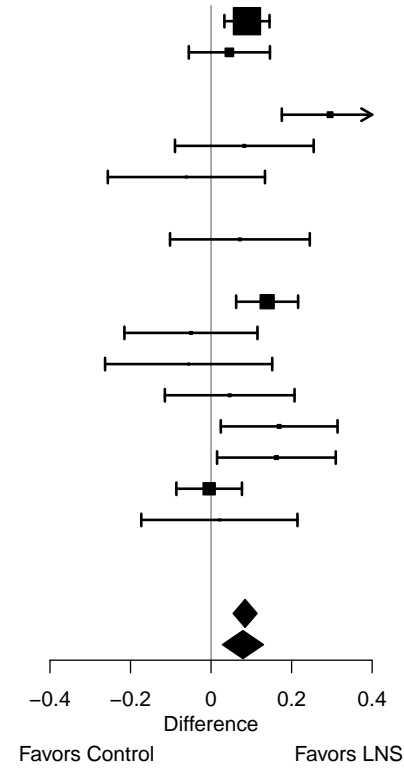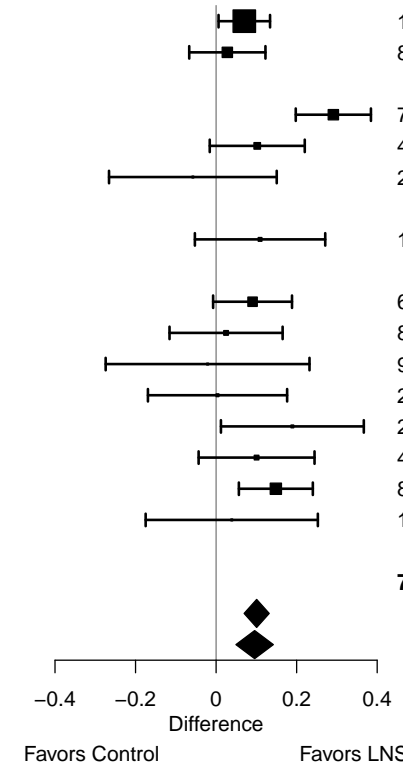

Supplemental figure 7G: Mean difference in MUACZ

7G2: Stratified by Household food insecurity

P-for-interaction = 0.595

Difference in MDs = -0.01 (-0.06, 0.03)

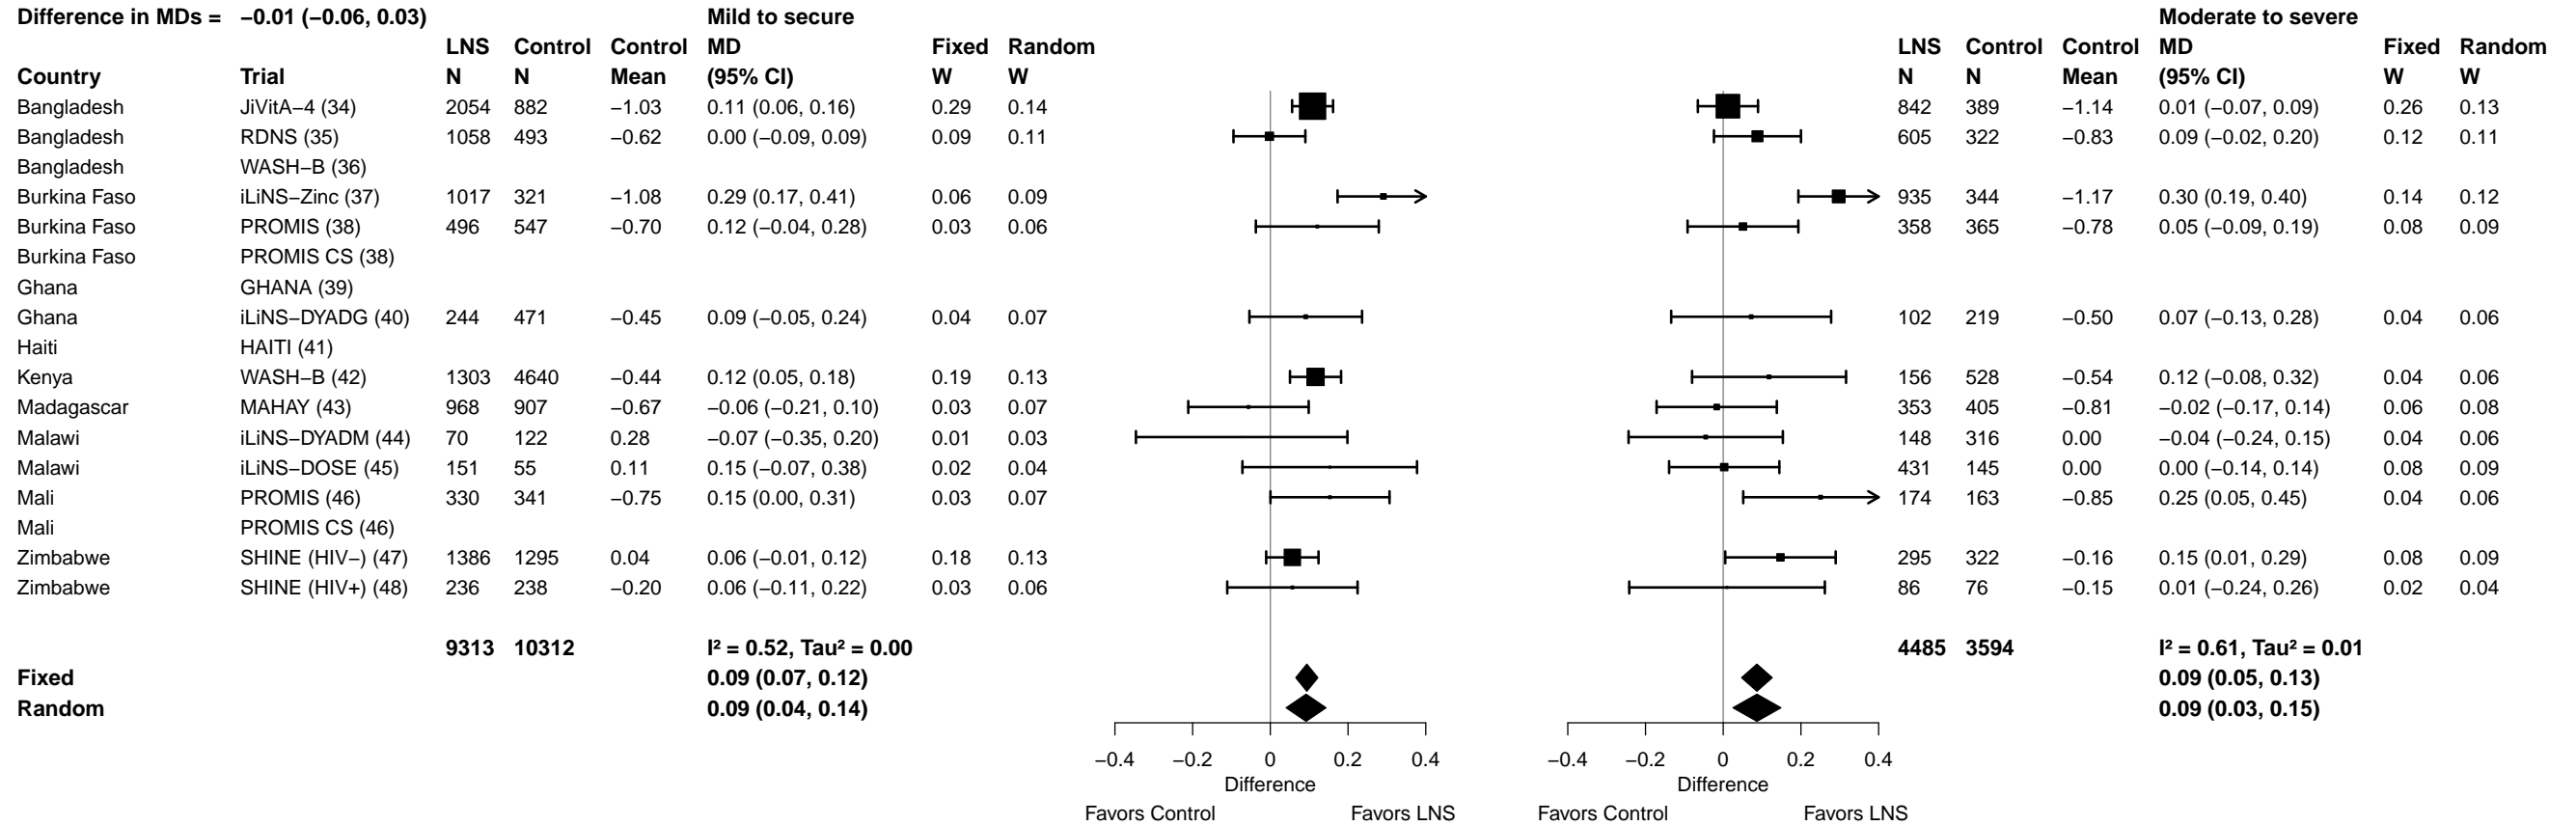



Supplemental figure 7G: Mean difference in MUACZ

7G4: Stratified by Household sanitation

P-for-interaction = 0.026

Difference in MDs = -0.06 (-0.12, -0.01)

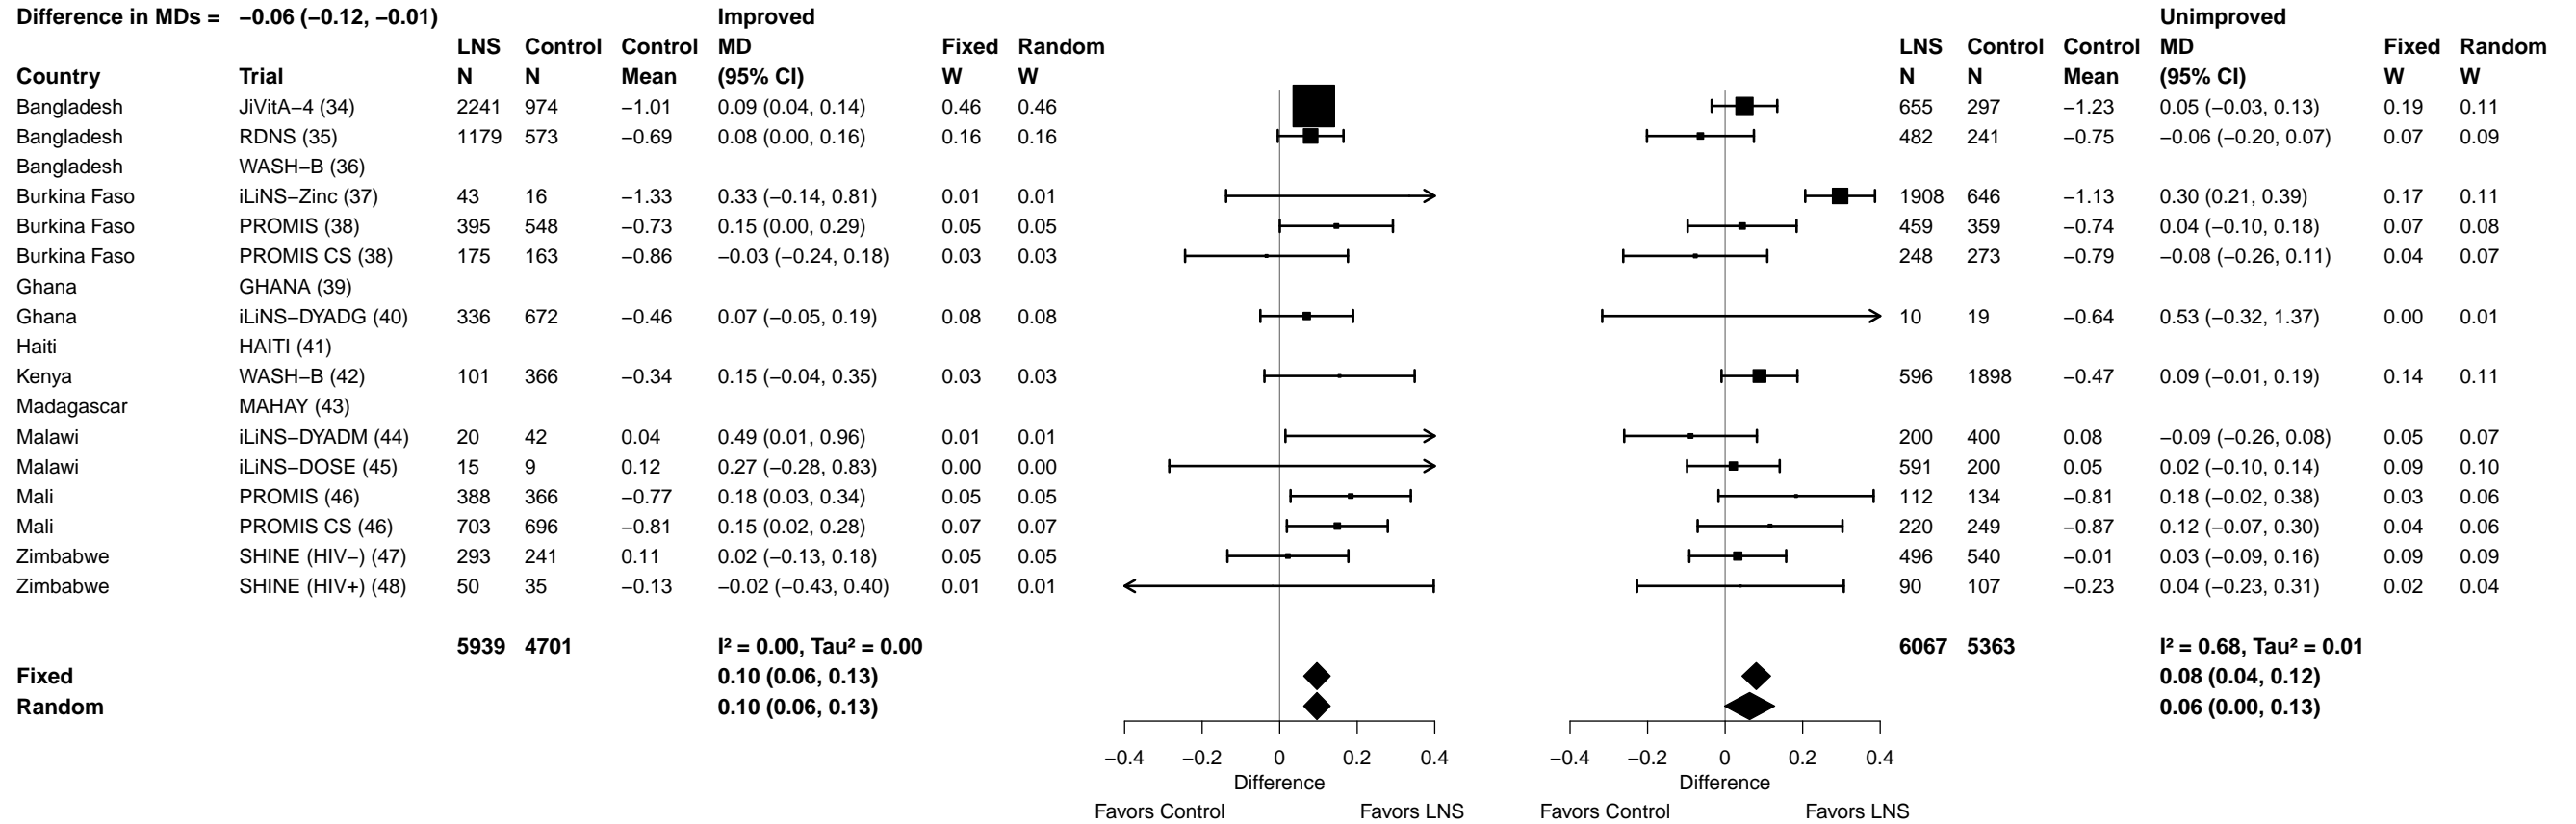

Supplemental figure 7G: Mean difference in MUACZ

7G5: Stratified by Home environment

P-for-interaction = 0.048  
 Difference in MDs = 0.07 (0.00, 0.13)

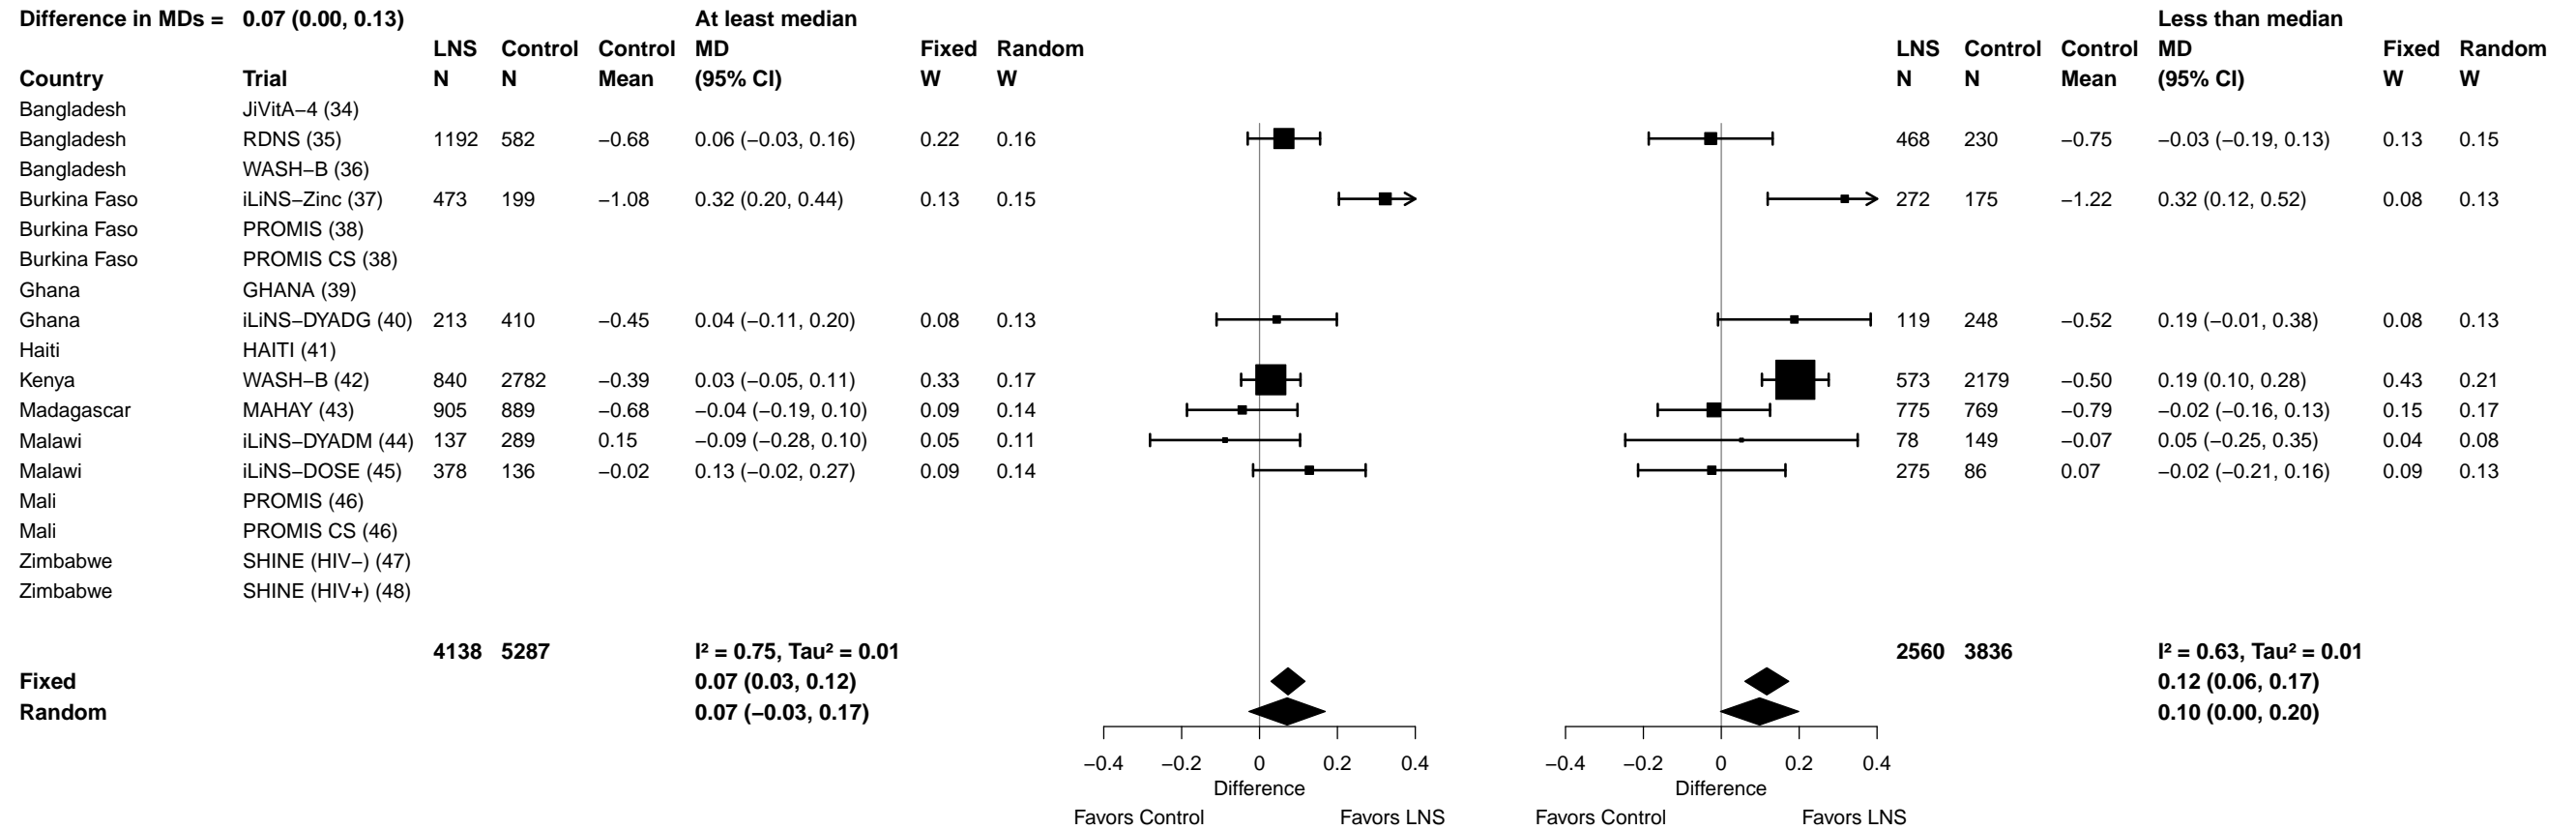

Supplemental figure 7G: Mean difference in MUACZ

7G6: Stratified by Season at the time of assessment

P-for-interaction = 0.977

Difference in MDs = 0.00 (-0.05, 0.05)

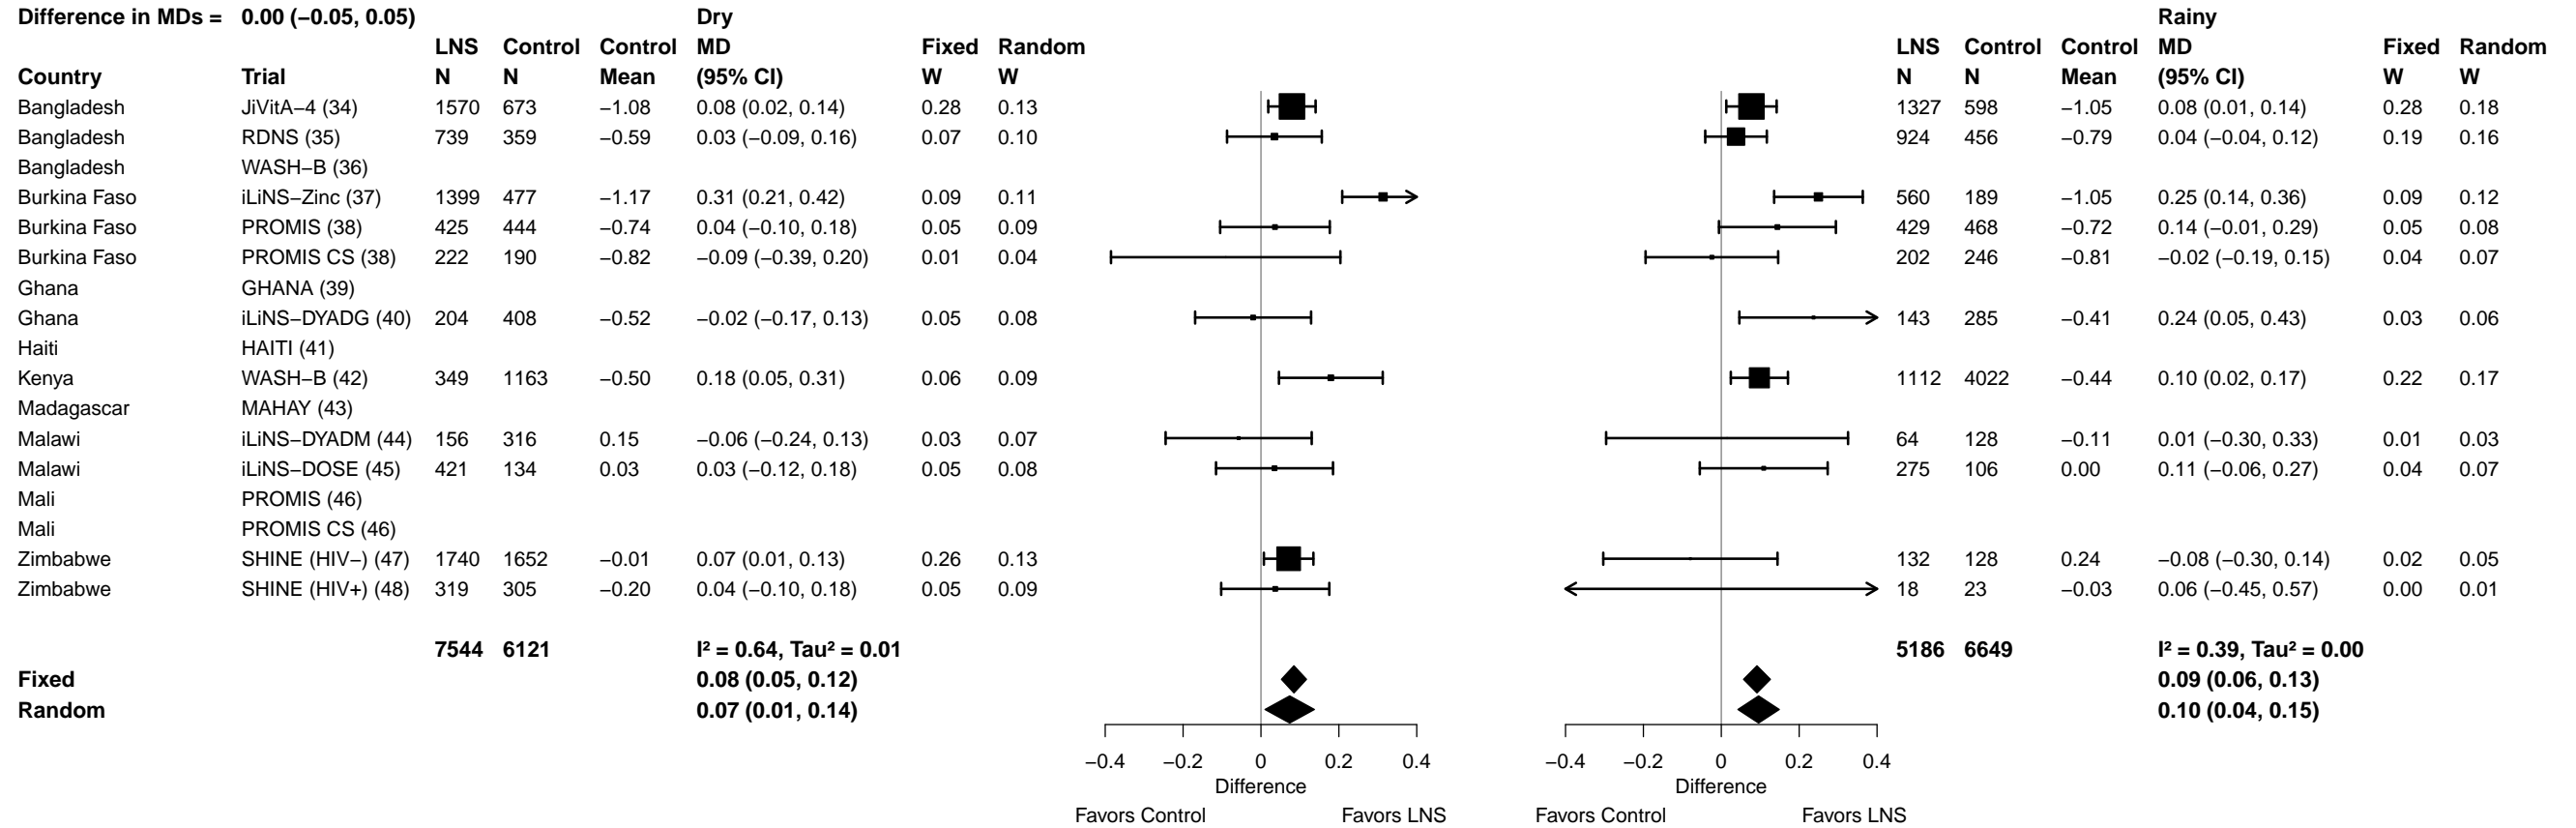



### Supplemental figure 7H: Low MUAC prevalence ratio

#### 7H1: Stratified by Household socio-economic status

P-for-interaction = 0.129

Ratio of PRs = 1.14 (0.96, 1.35)

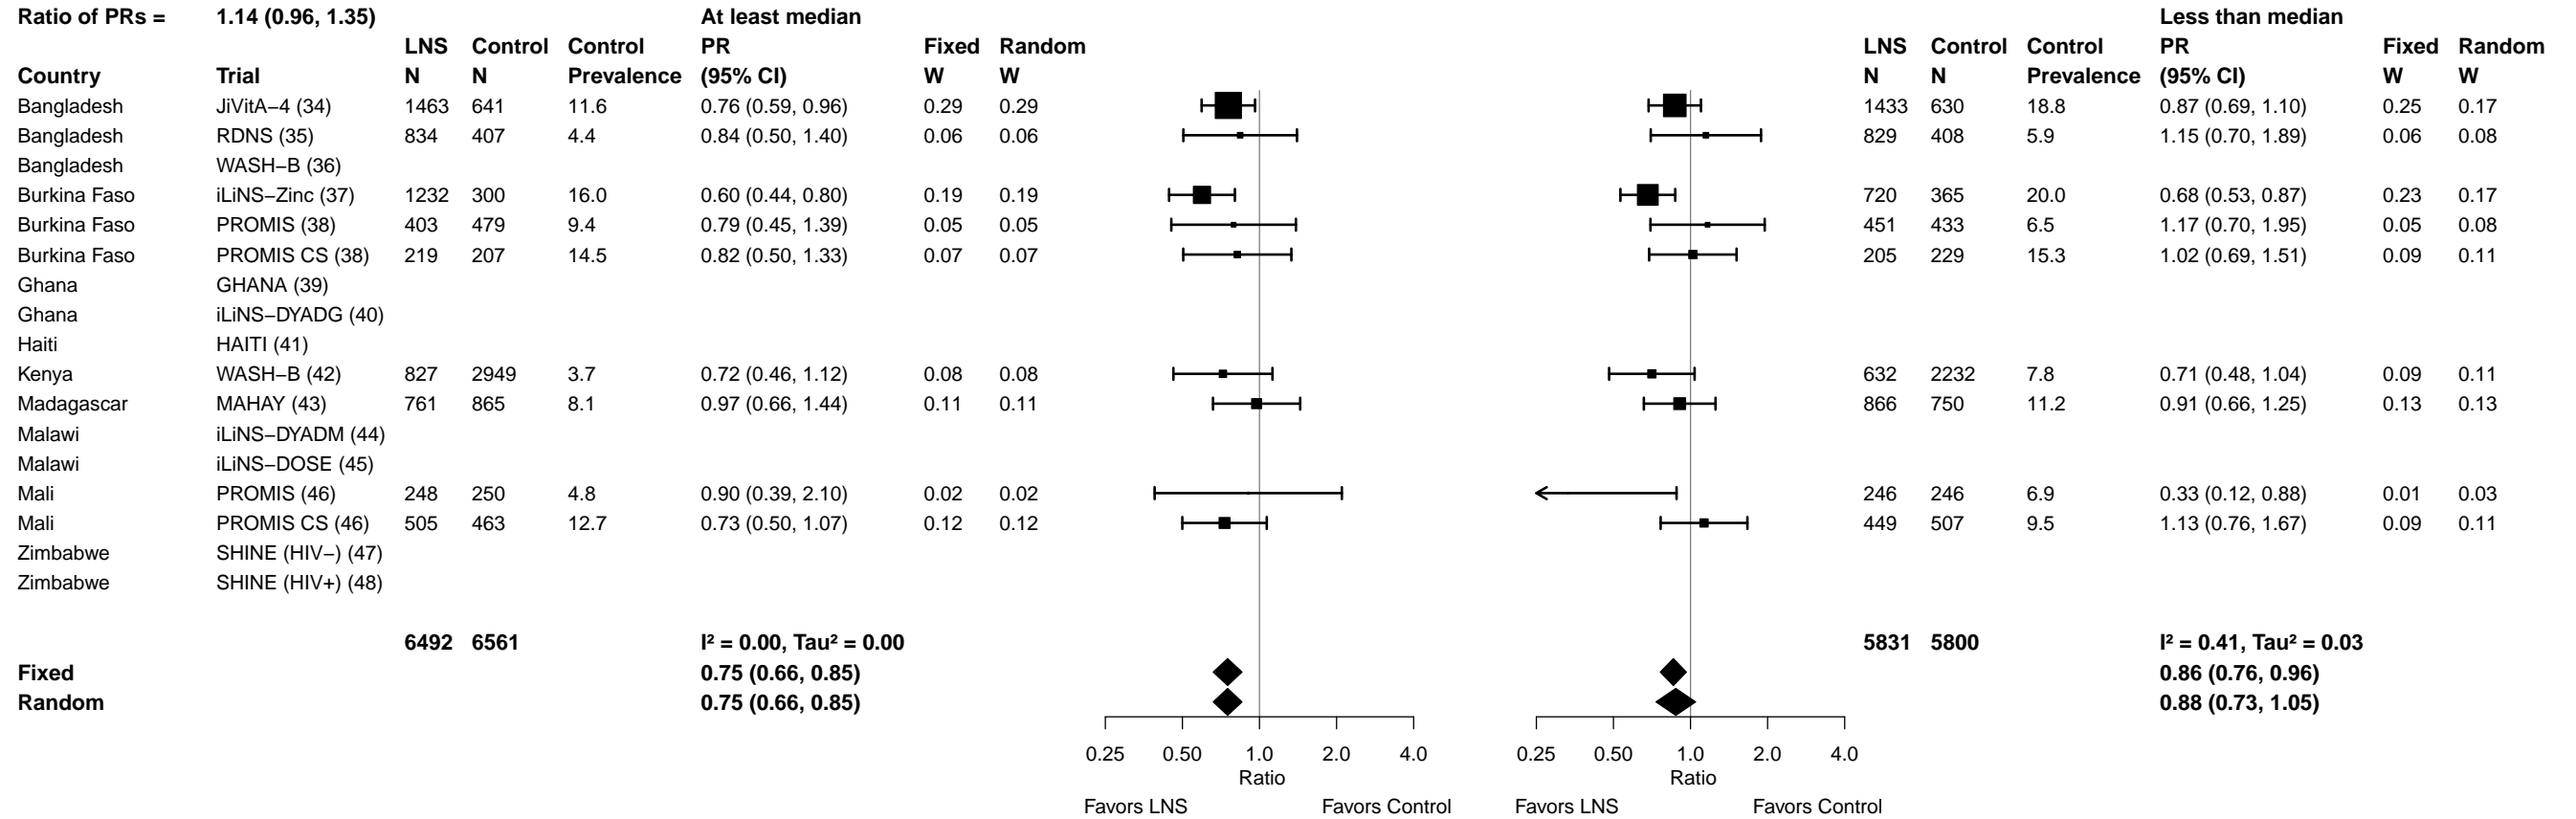

Supplemental figure 7H: Low MUAC prevalence ratio

7H2: Stratified by Household food insecurity

P-for-interaction = 0.182

Ratio of PRs = 1.15 (0.93, 1.42)

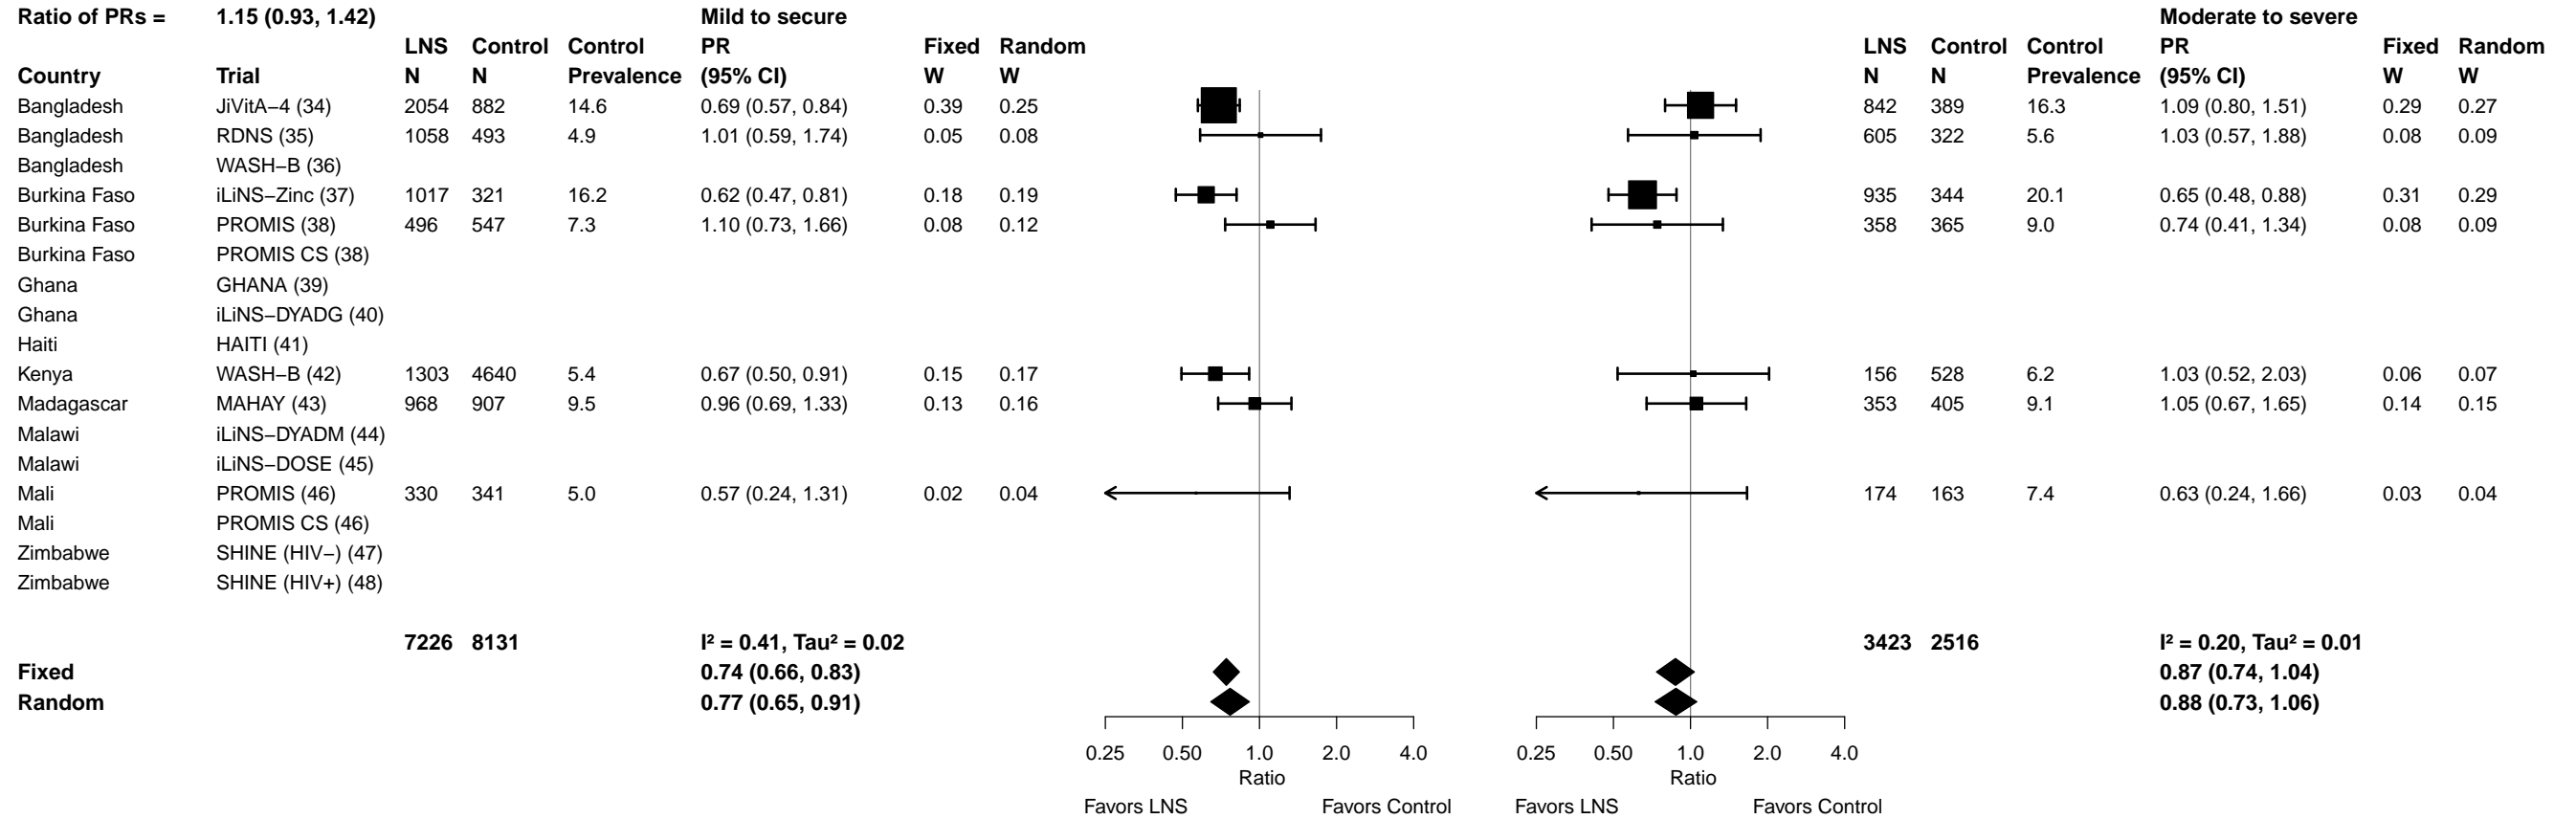

Supplemental figure 7H: Low MUAC prevalence ratio

7H3: Stratified by Household source water quality

P-for-interaction = 0.130

Ratio of PRs = 0.85 (0.69, 1.05)

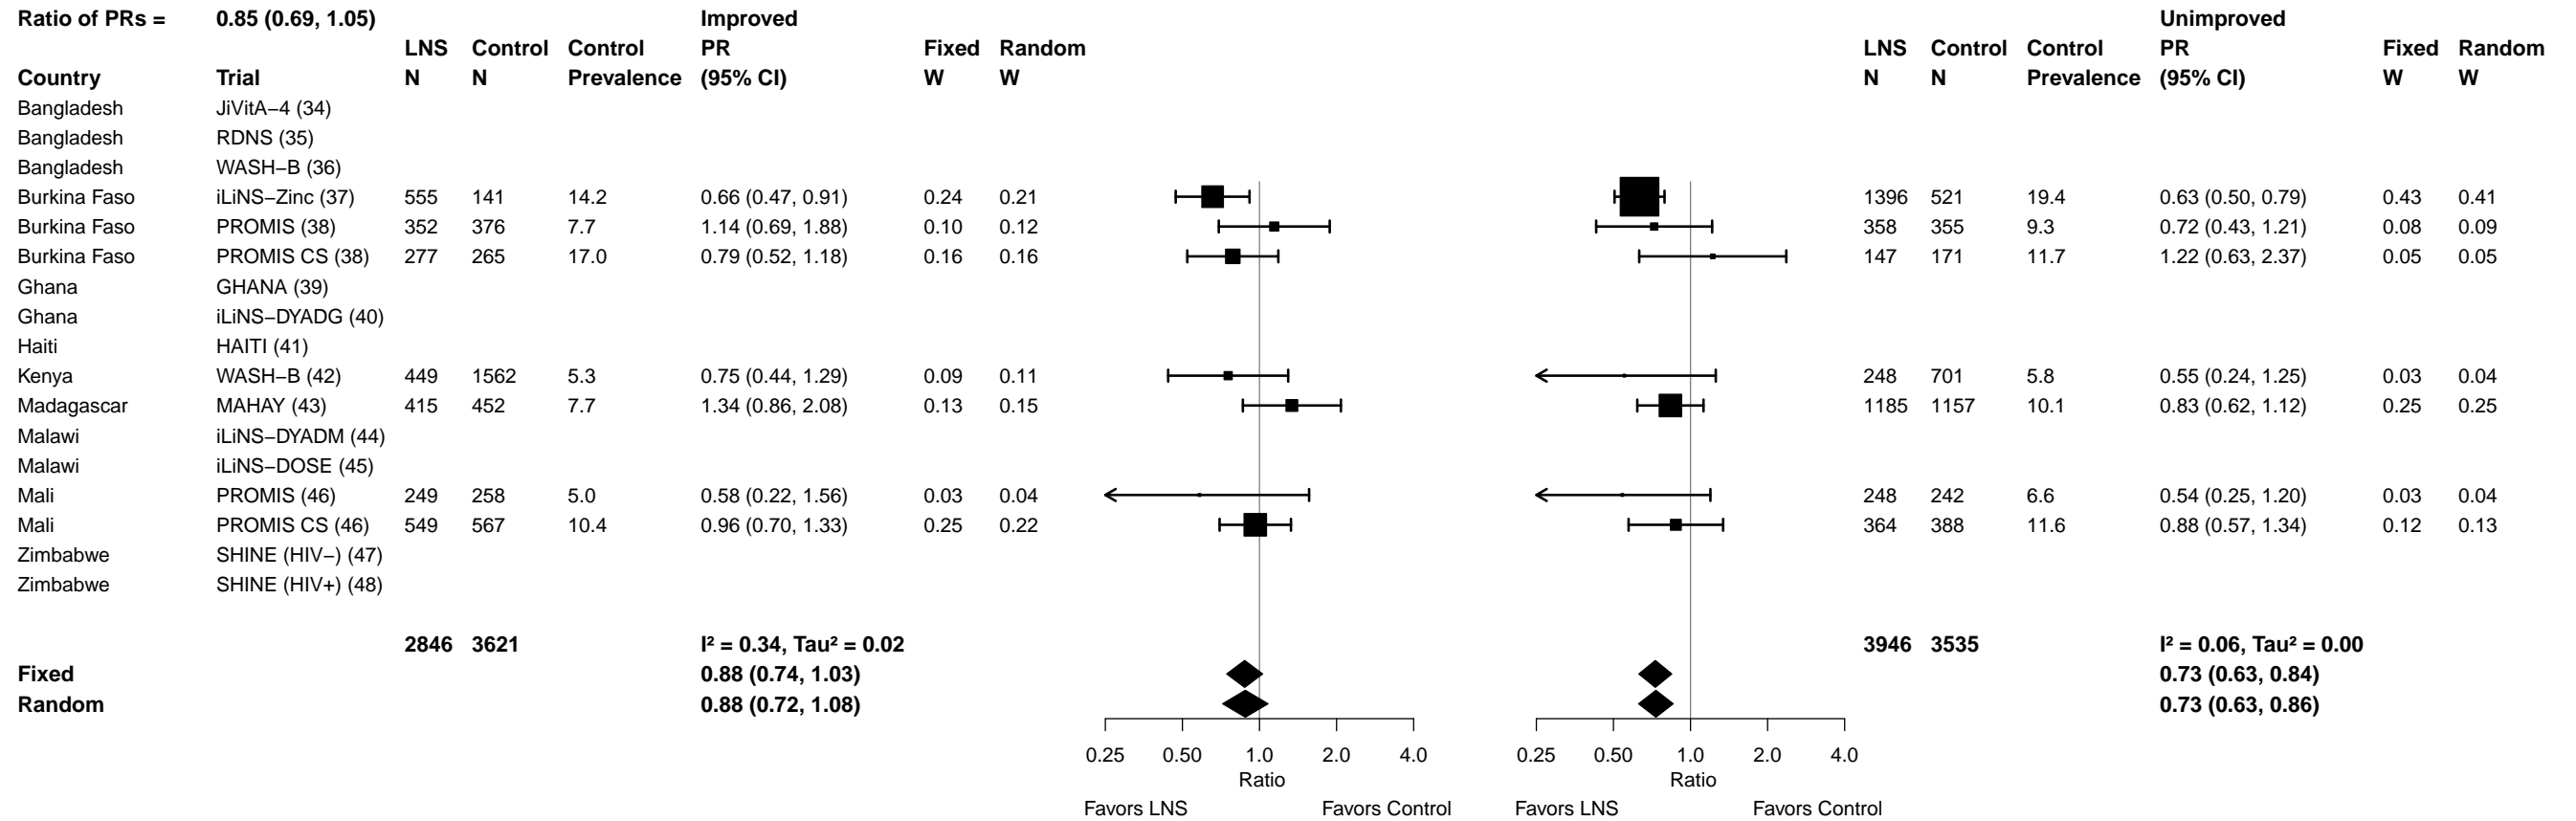

Supplemental figure 7H: Low MUAC prevalence ratio

7H4: Stratified by Household sanitation

P-for-interaction = 0.239

Ratio of PRs = 1.15 (0.91, 1.46)

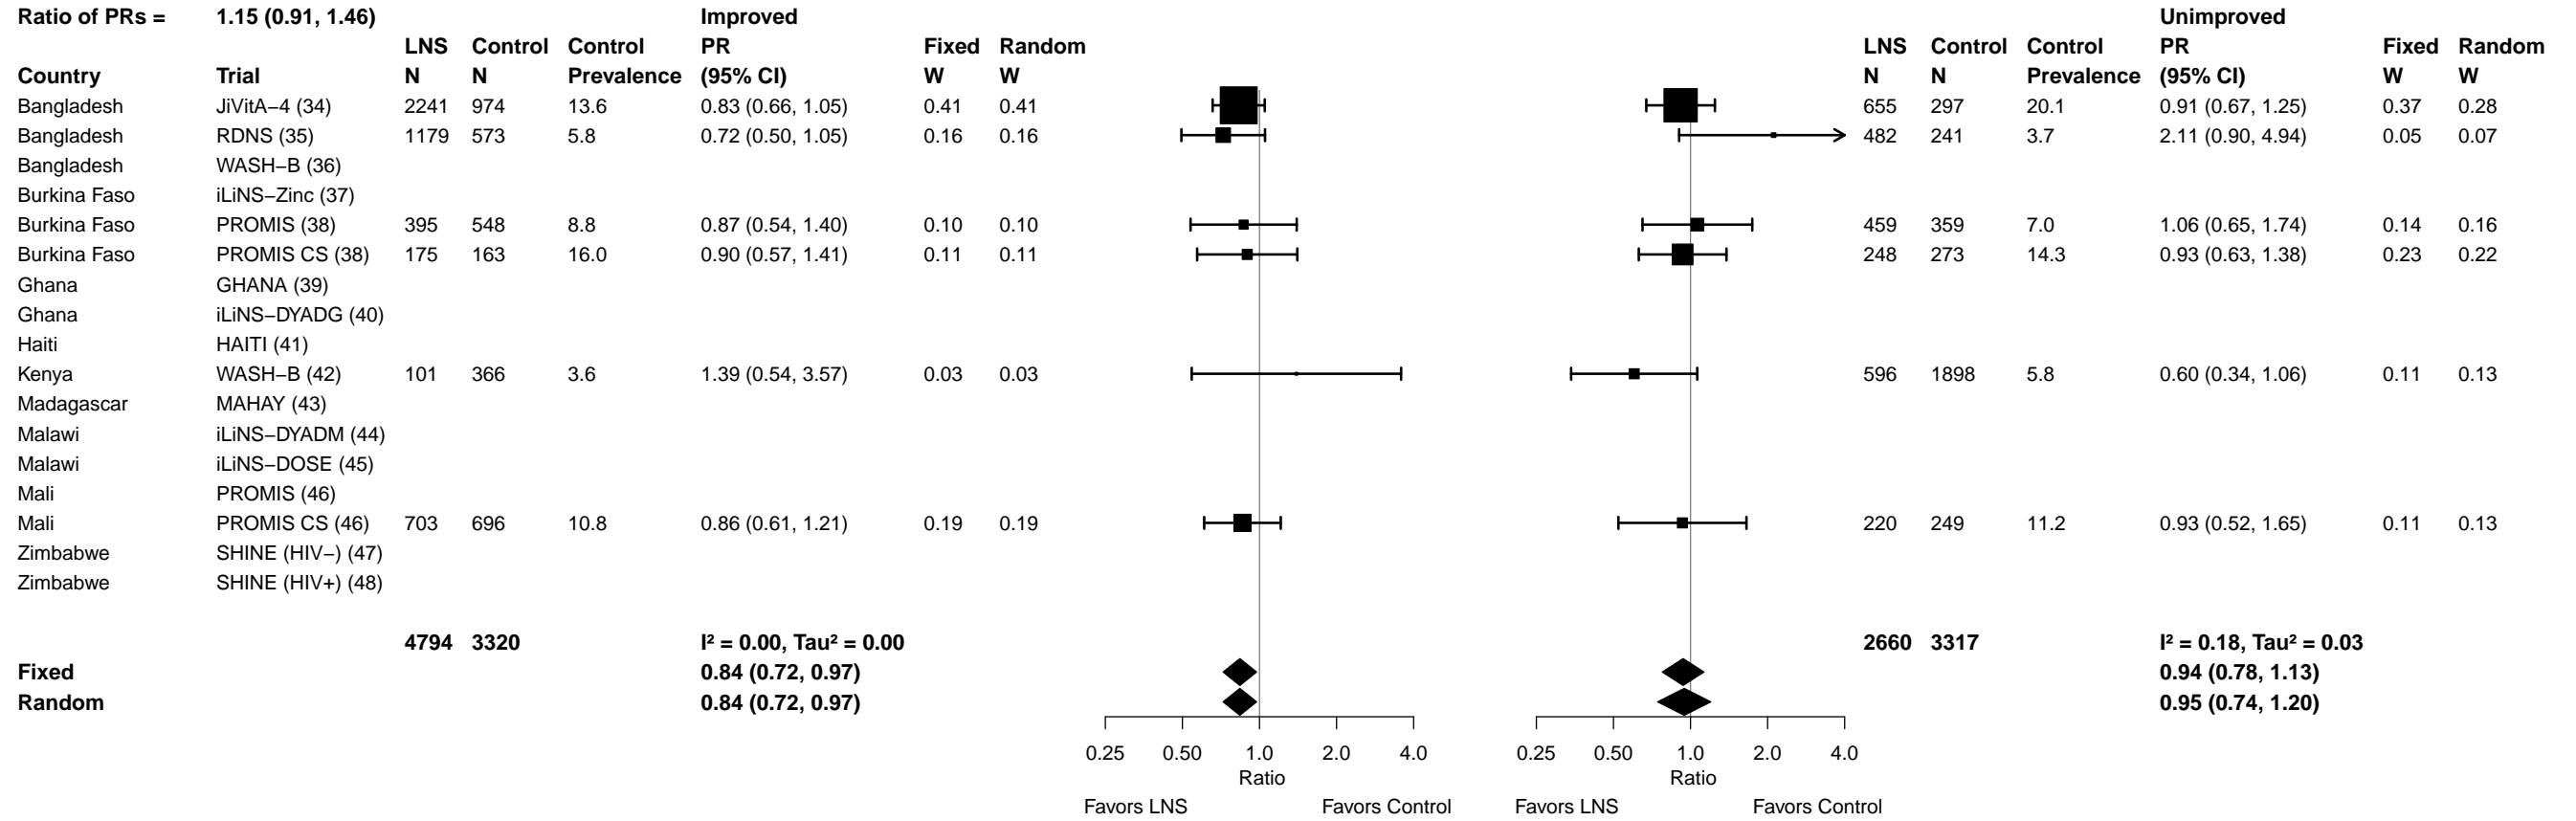

Supplemental figure 7H: Low MUAC prevalence ratio

7H5: Stratified by Home environment

P-for-interaction = 0.543

Ratio of PRs = 1.10 (0.81, 1.48)

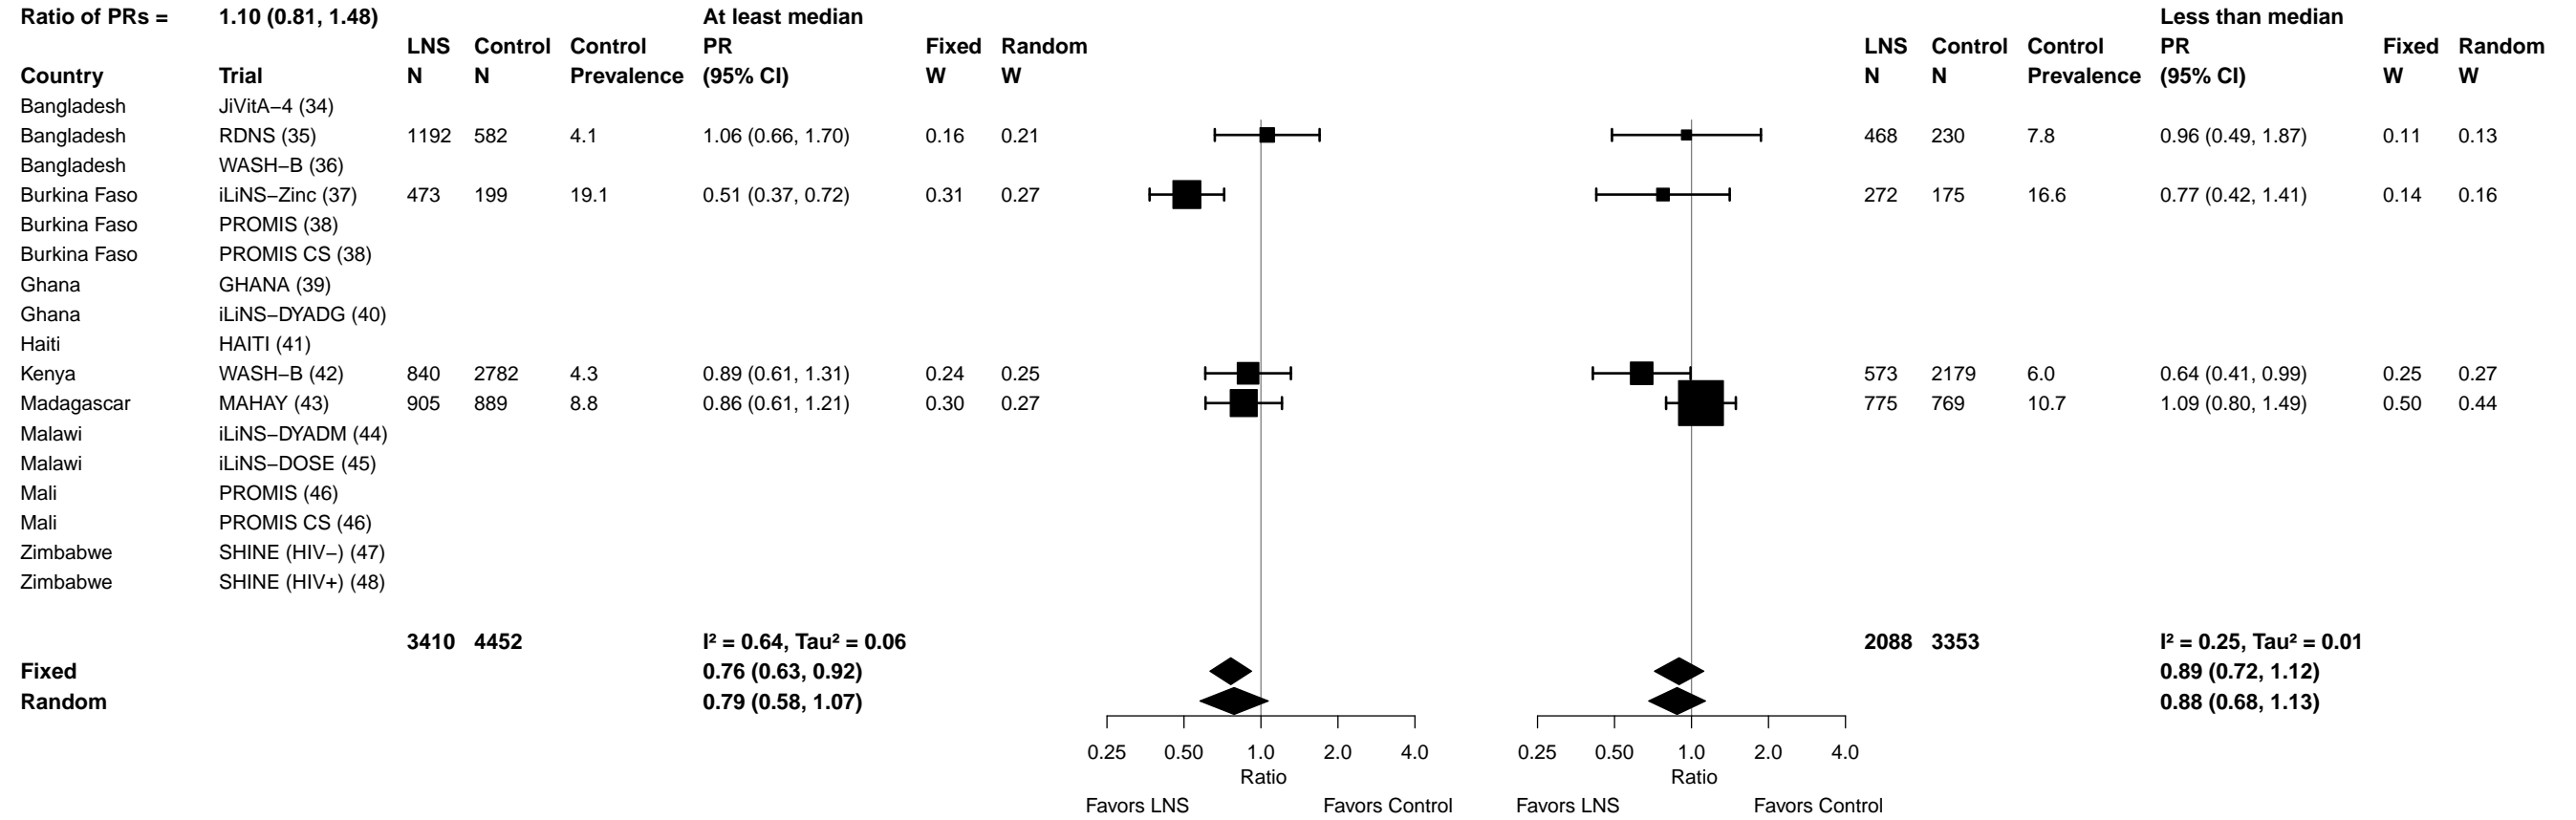

Supplemental figure 7H: Low MUAC prevalence ratio

7H6: Stratified by Season at the time of assessment

P-for-interaction = 0.301

Ratio of PRs = 0.89 (0.72, 1.11)

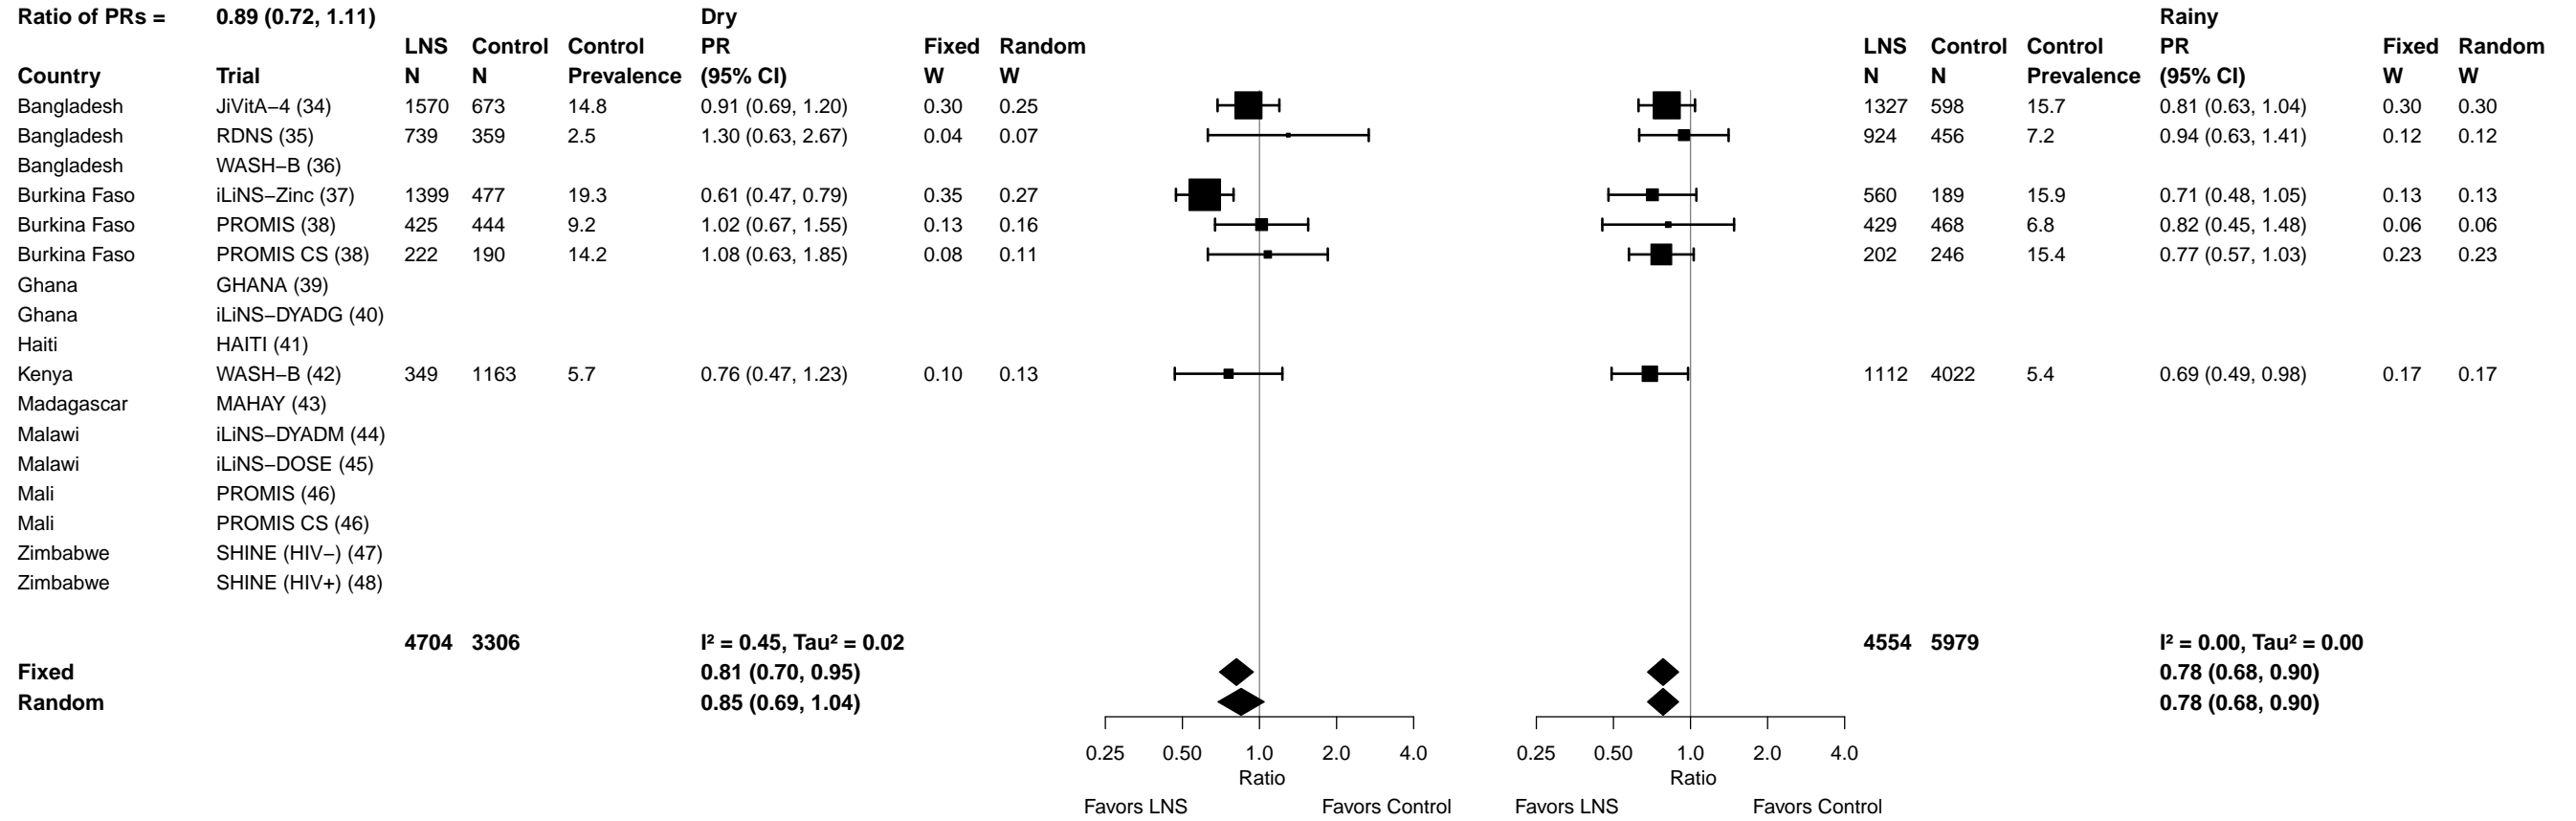

### Supplemental figure 7I: Low MUAC prevalence difference

#### 7I1: Stratified by Household socio-economic status

P-for-interaction = 0.735

Difference in PDs = 0.00 (-0.02, 0.01)

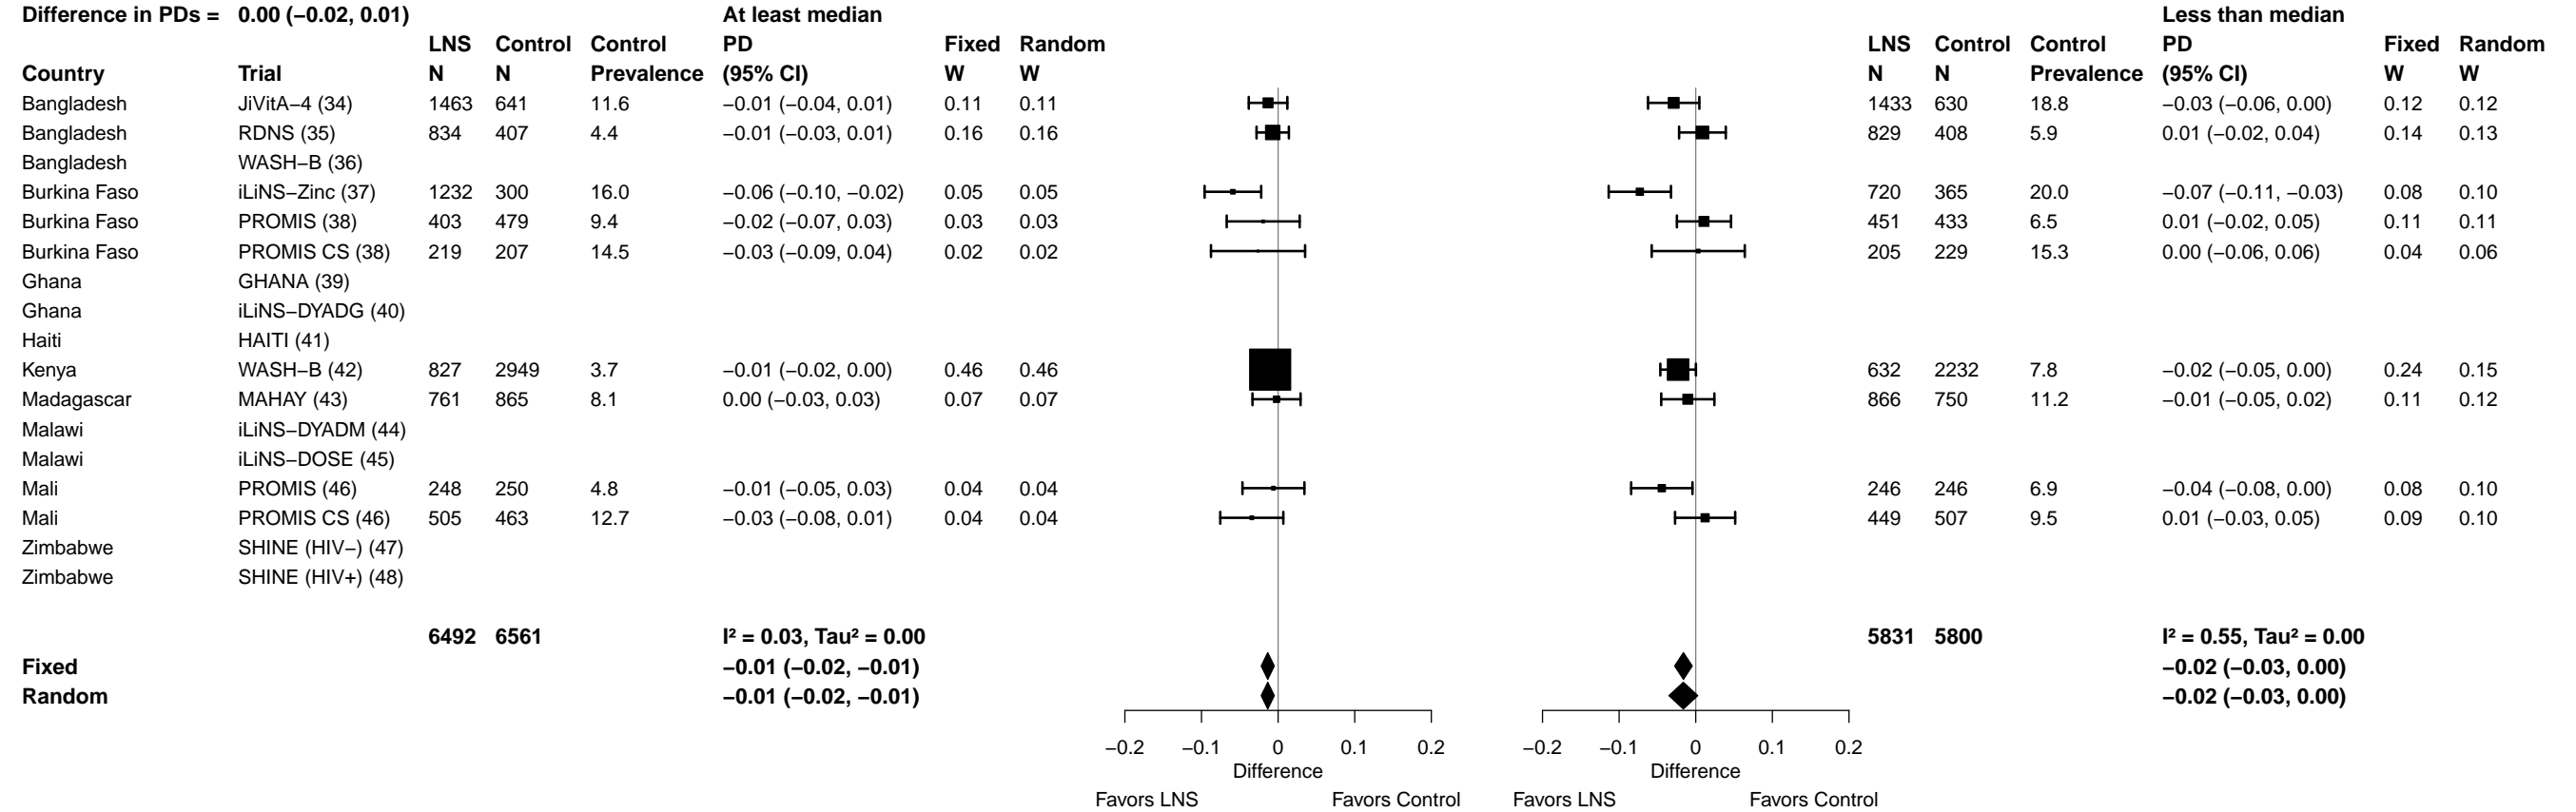

Supplemental figure 7I: Low MUAC prevalence difference

7I2: Stratified by Household food insecurity

P-for-interaction = 0.630

Difference in PDs = 0.00 (-0.01, 0.02)

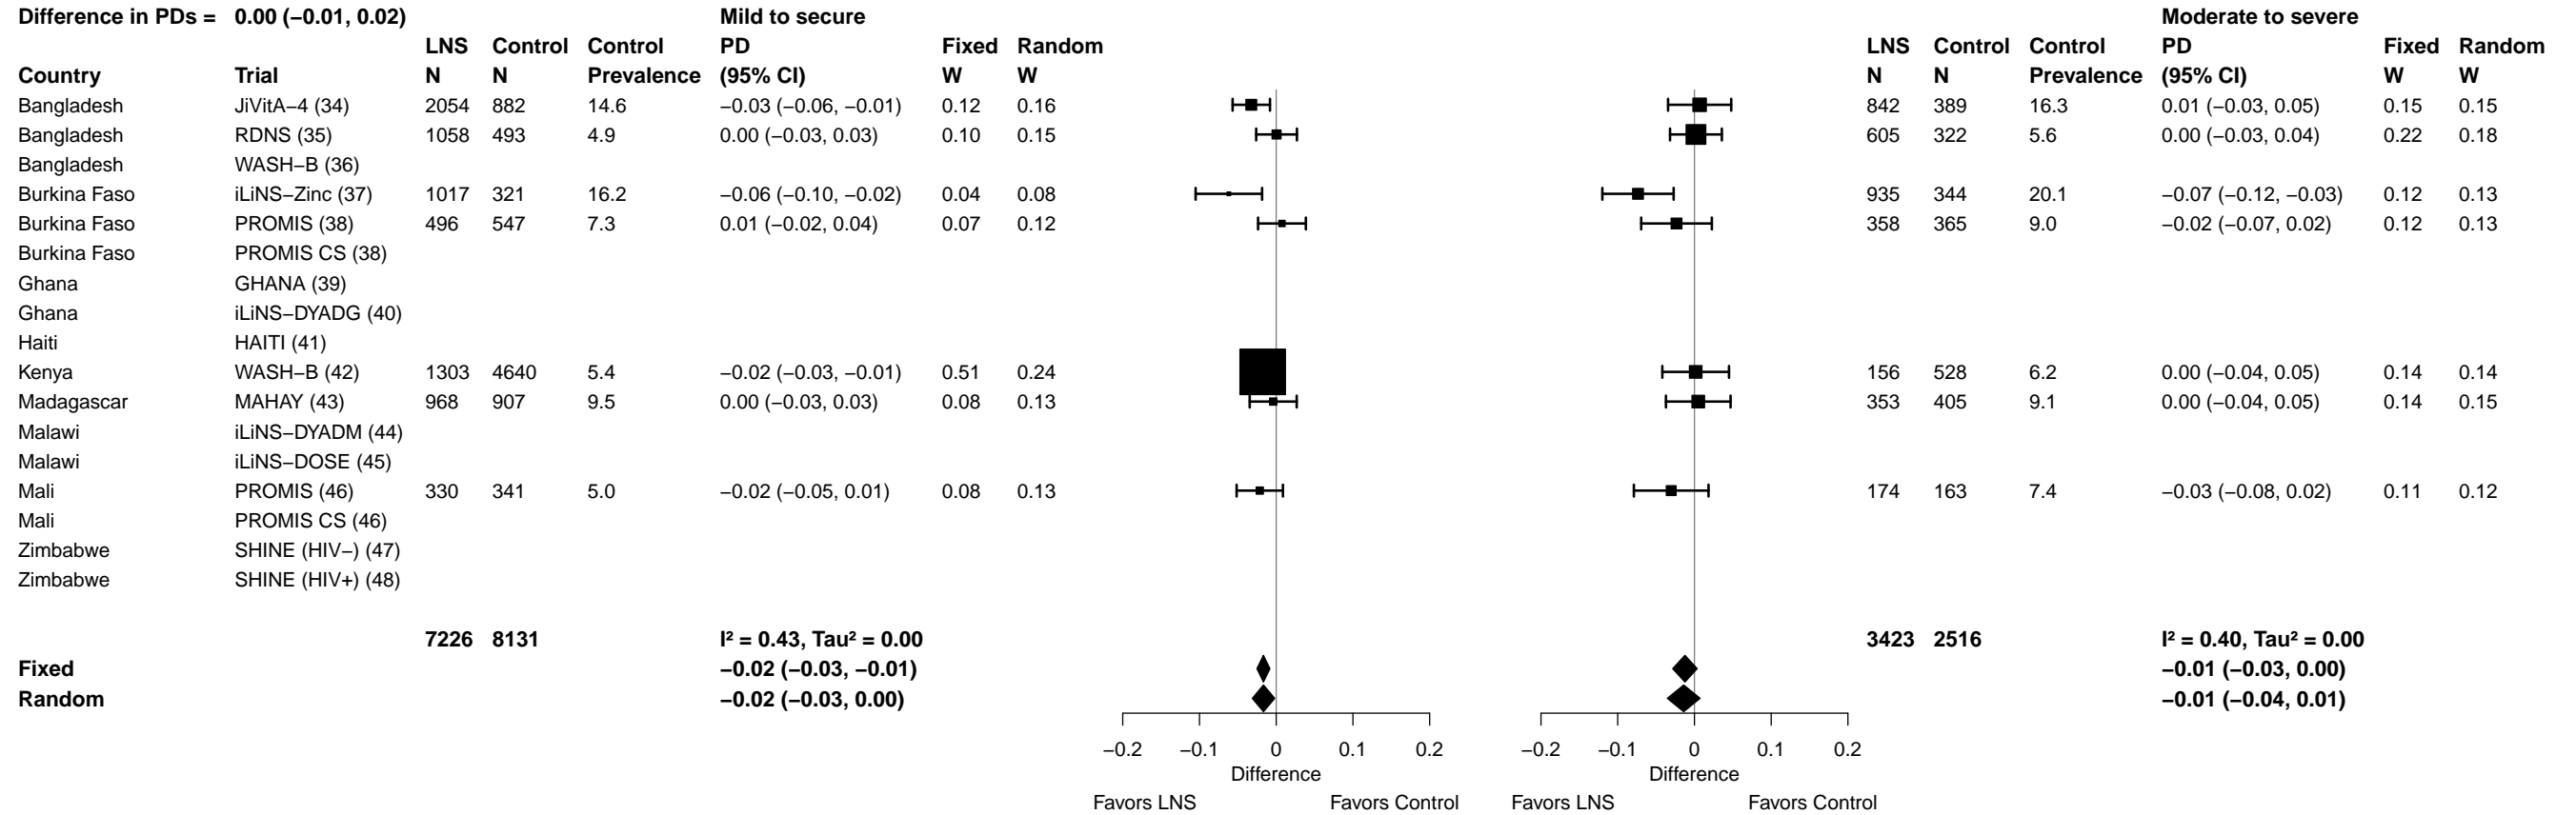



Supplemental figure 7I: Low MUAC prevalence difference

7I3: Stratified by Household source water quality

P-for-interaction = 0.039

Difference in PDs = -0.02 (-0.04, 0.00)

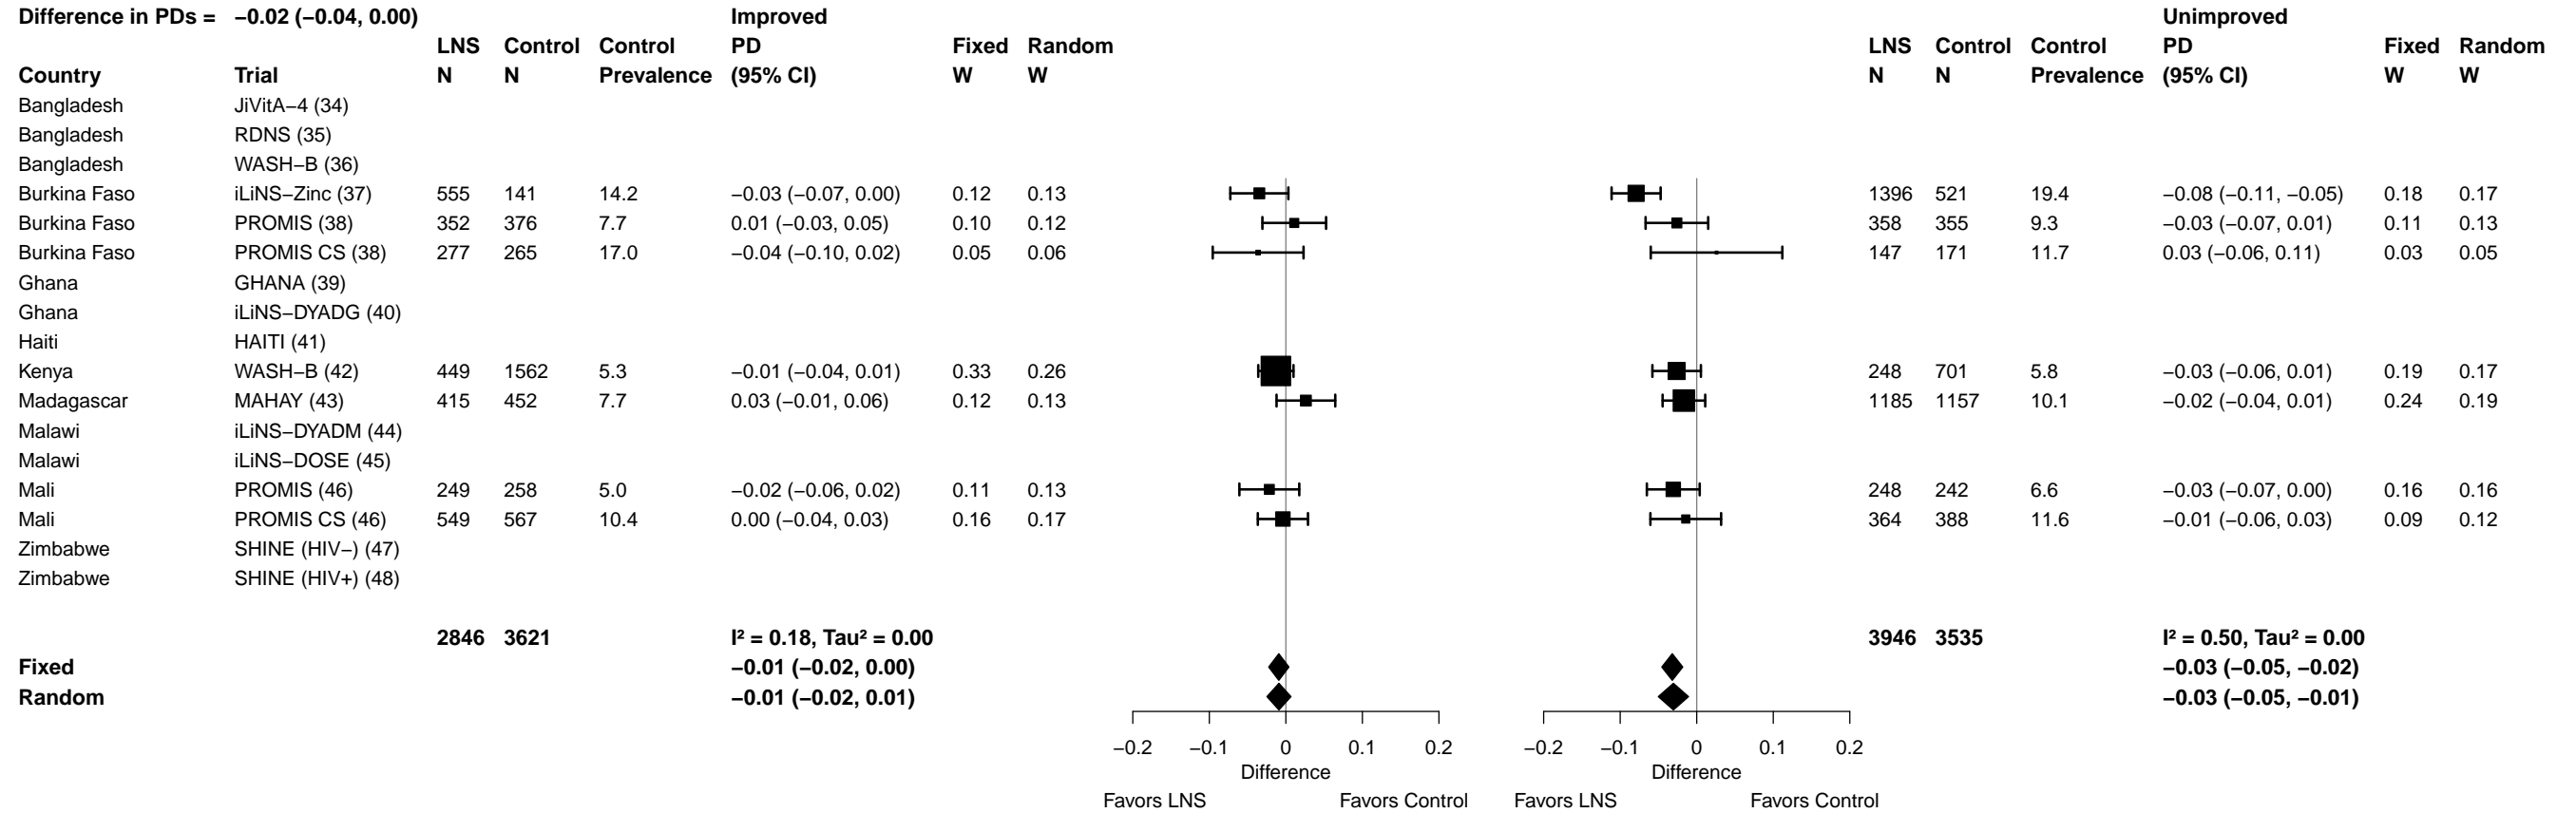

Supplemental figure 7I: Low MUAC prevalence difference

7I4: Stratified by Household sanitation

P-for-interaction = 0.165

Difference in PDs = 0.02 (-0.01, 0.04)

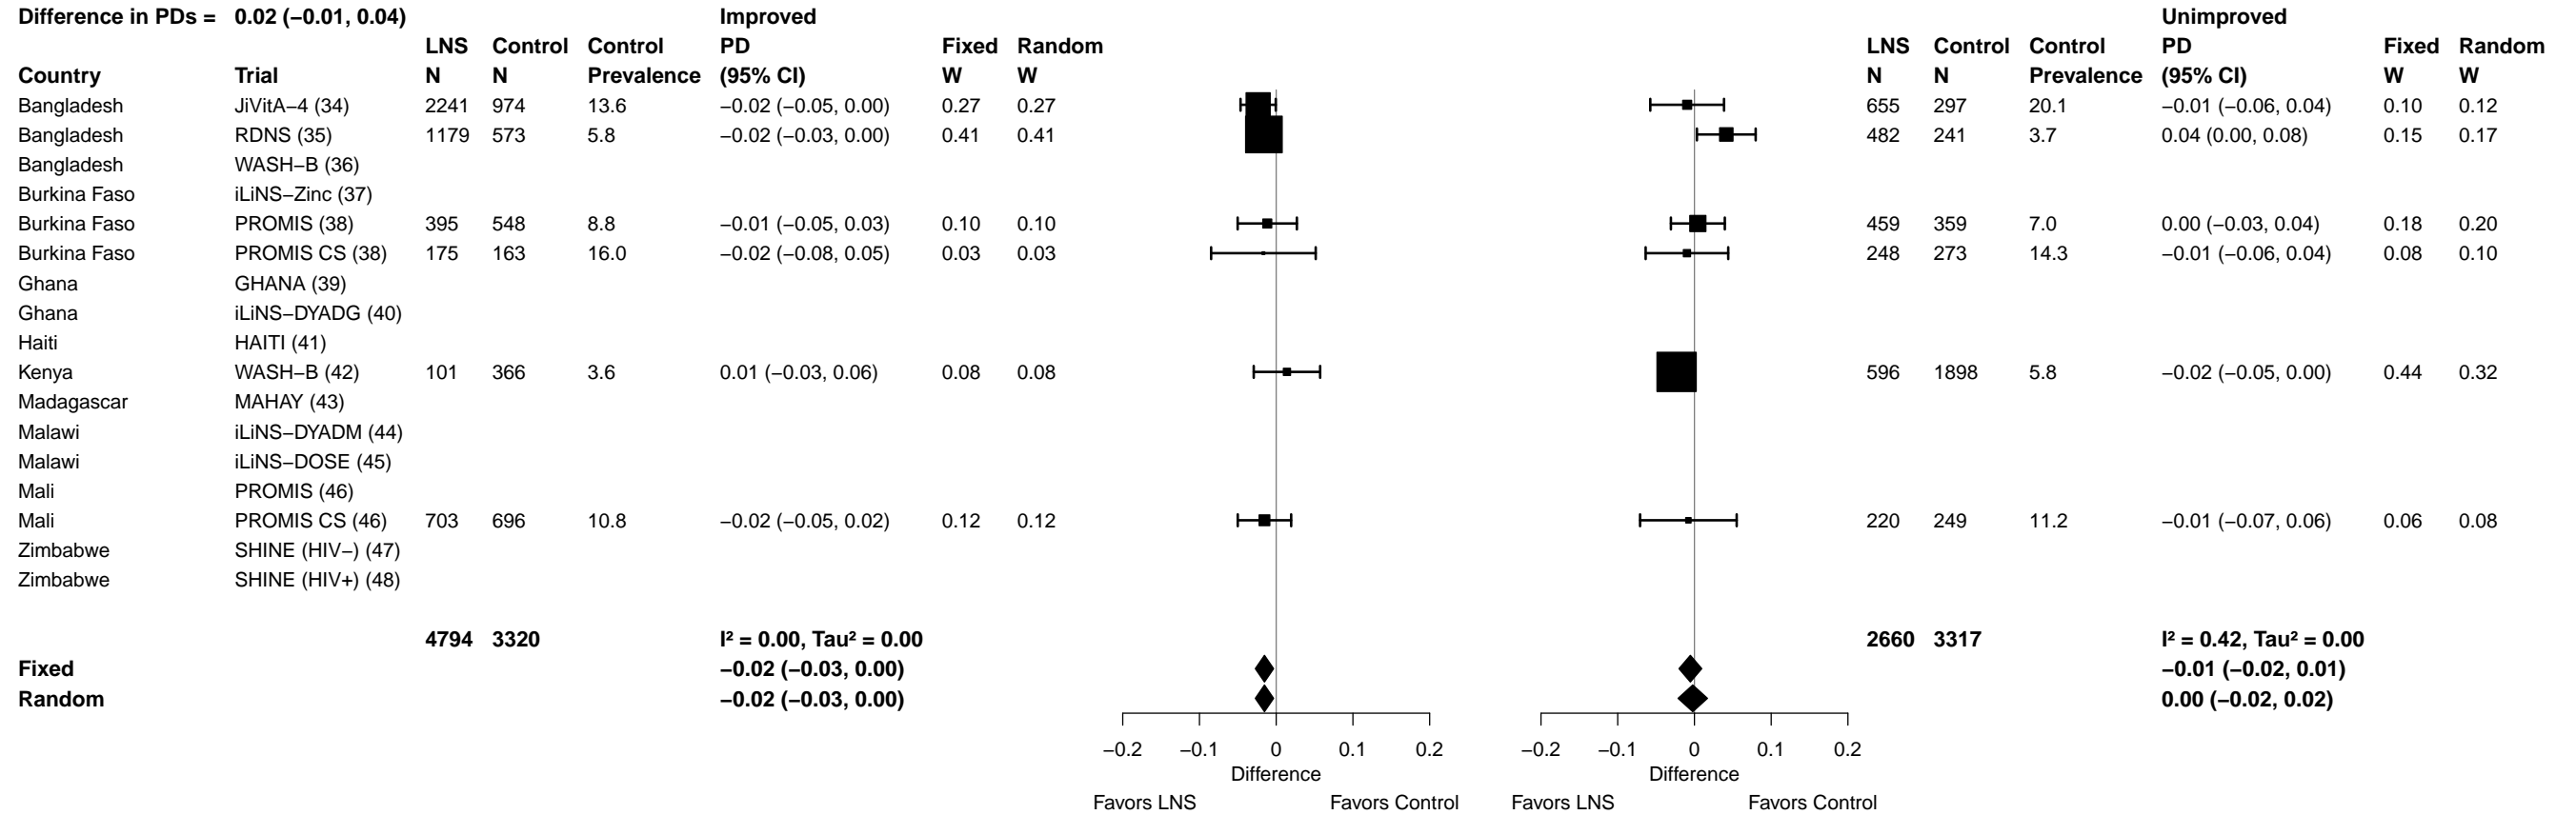

Supplemental figure 7I: Low MUAC prevalence difference

7I5: Stratified by Home environment

P-for-interaction = 0.688

Difference in PDs = 0.00 (-0.02, 0.01)

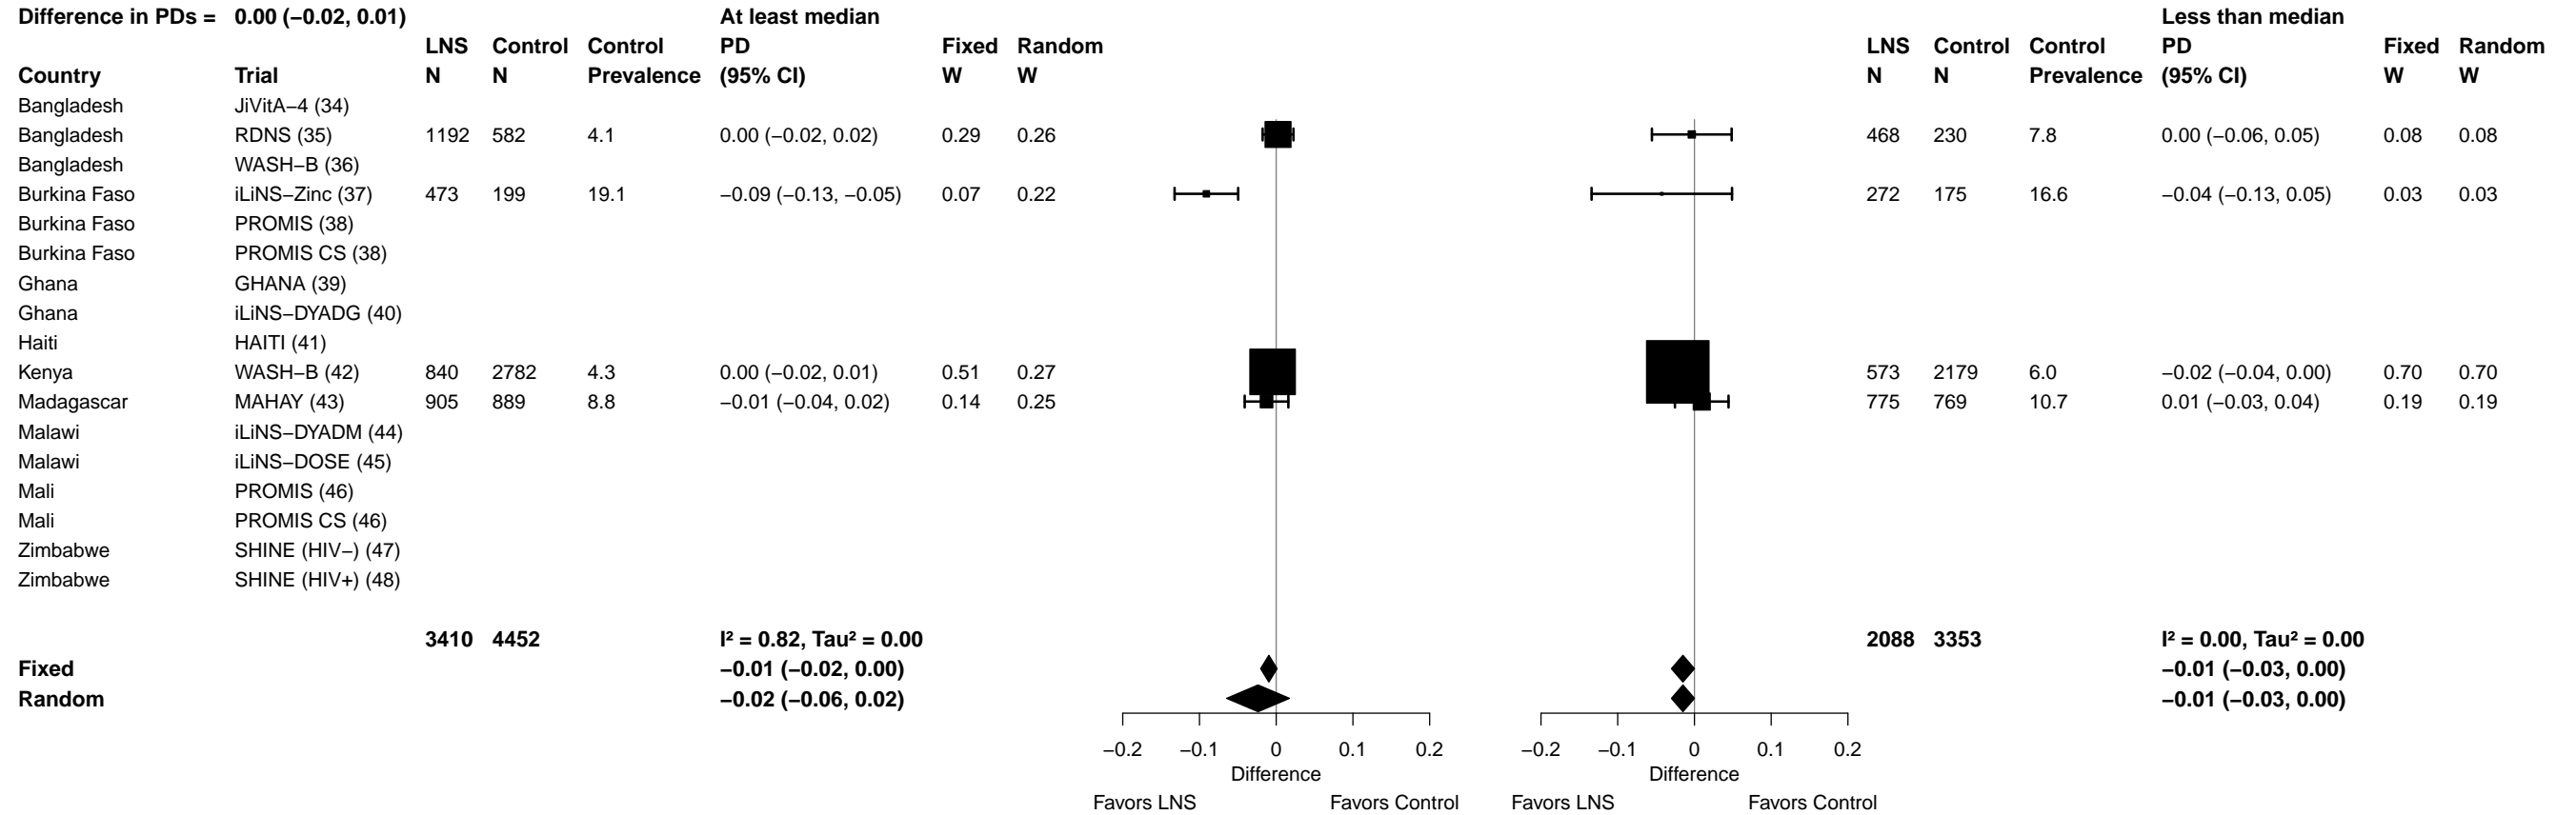

Supplemental figure 7I: Low MUAC prevalence difference

7I6: Stratified by Season at the time of assessment

P-for-interaction = 0.322

Difference in PDs = -0.01 (-0.03, 0.01)

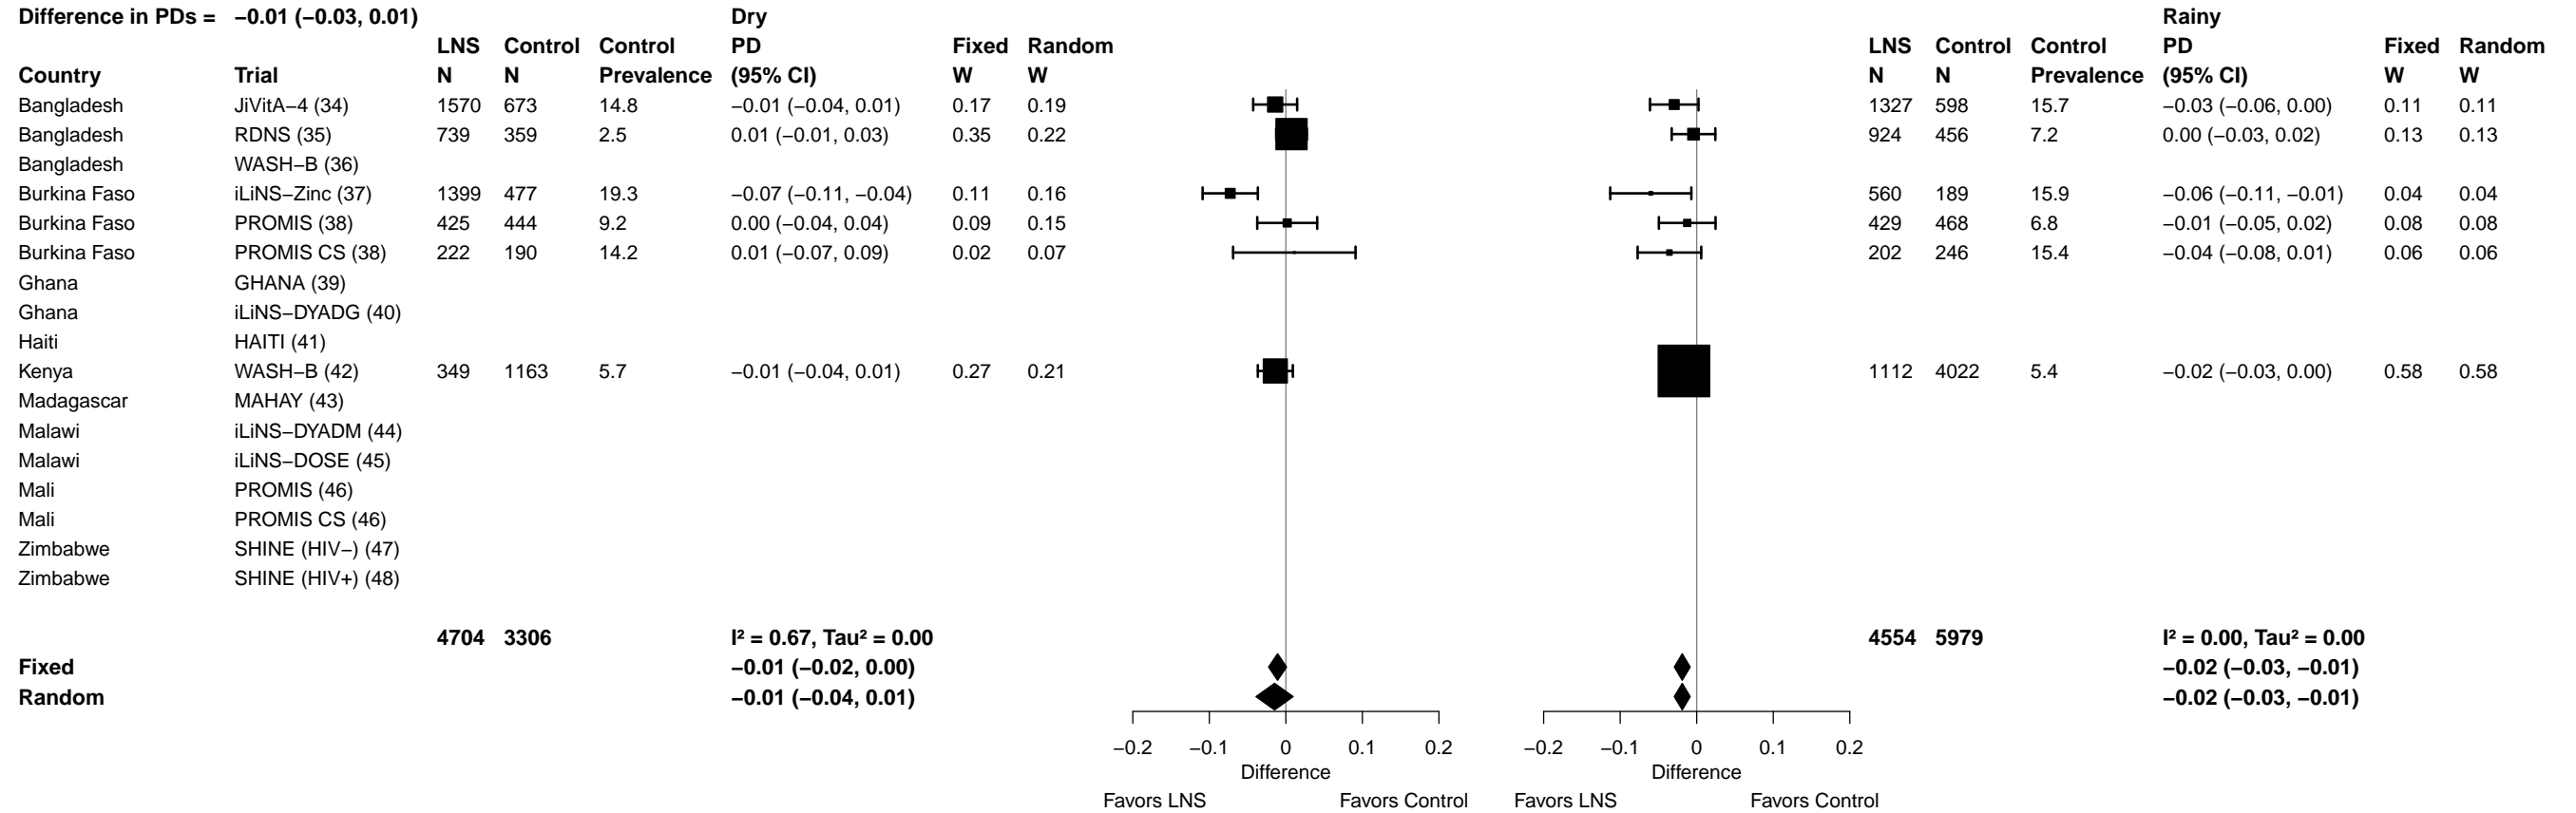

### Supplemental figure 7J: Acute malnutrition prevalence ratio

#### 7J1: Stratified by Household socio-economic status

P-for-interaction = 0.312  
 Ratio of PRs = 1.08 (0.93, 1.25)

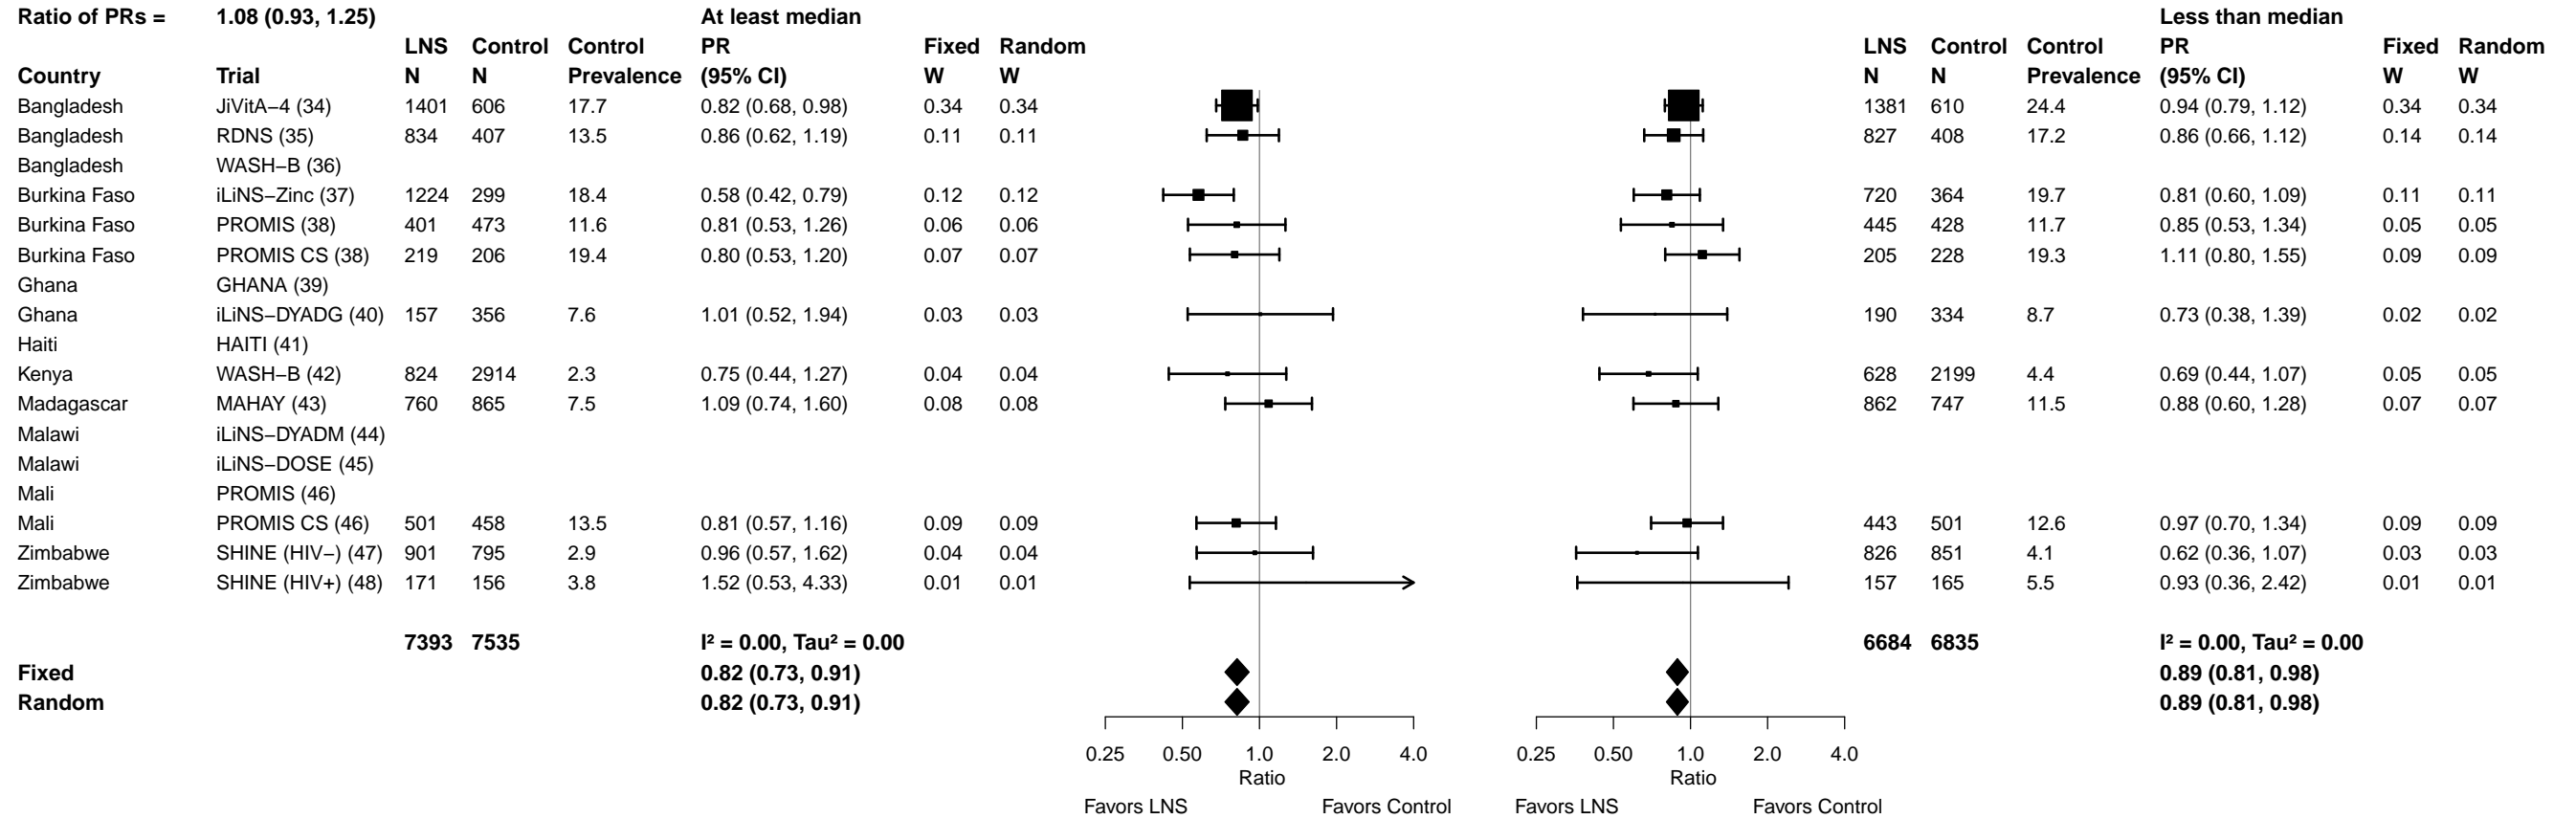



Supplemental figure 7J: Acute malnutrition prevalence ratio

7J3: Stratified by Household source water quality

P-for-interaction = 0.789

Ratio of PRs = 1.03 (0.82, 1.30)

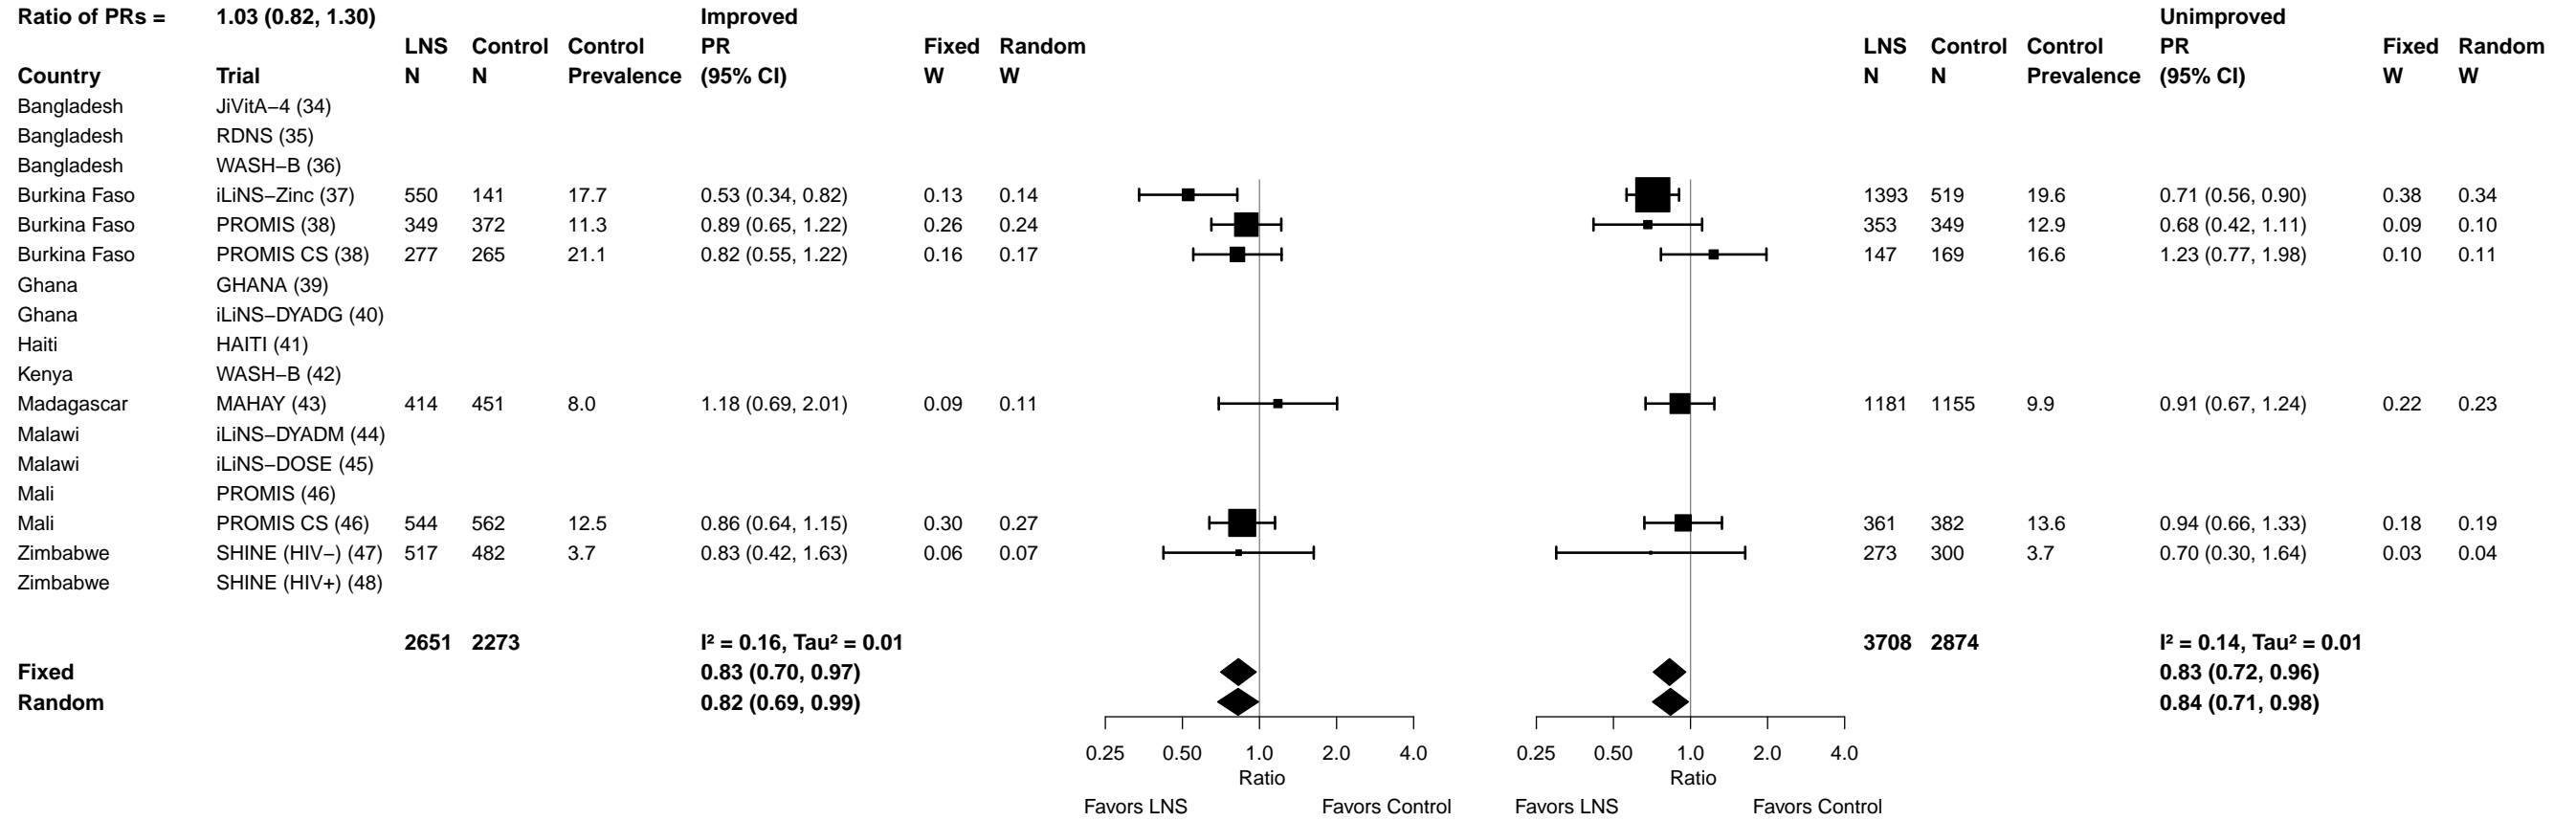

Supplemental figure 7J: Acute malnutrition prevalence ratio

7J4: Stratified by Household sanitation

P-for-interaction = 0.013

Ratio of PRs = 1.25 (1.05, 1.49)

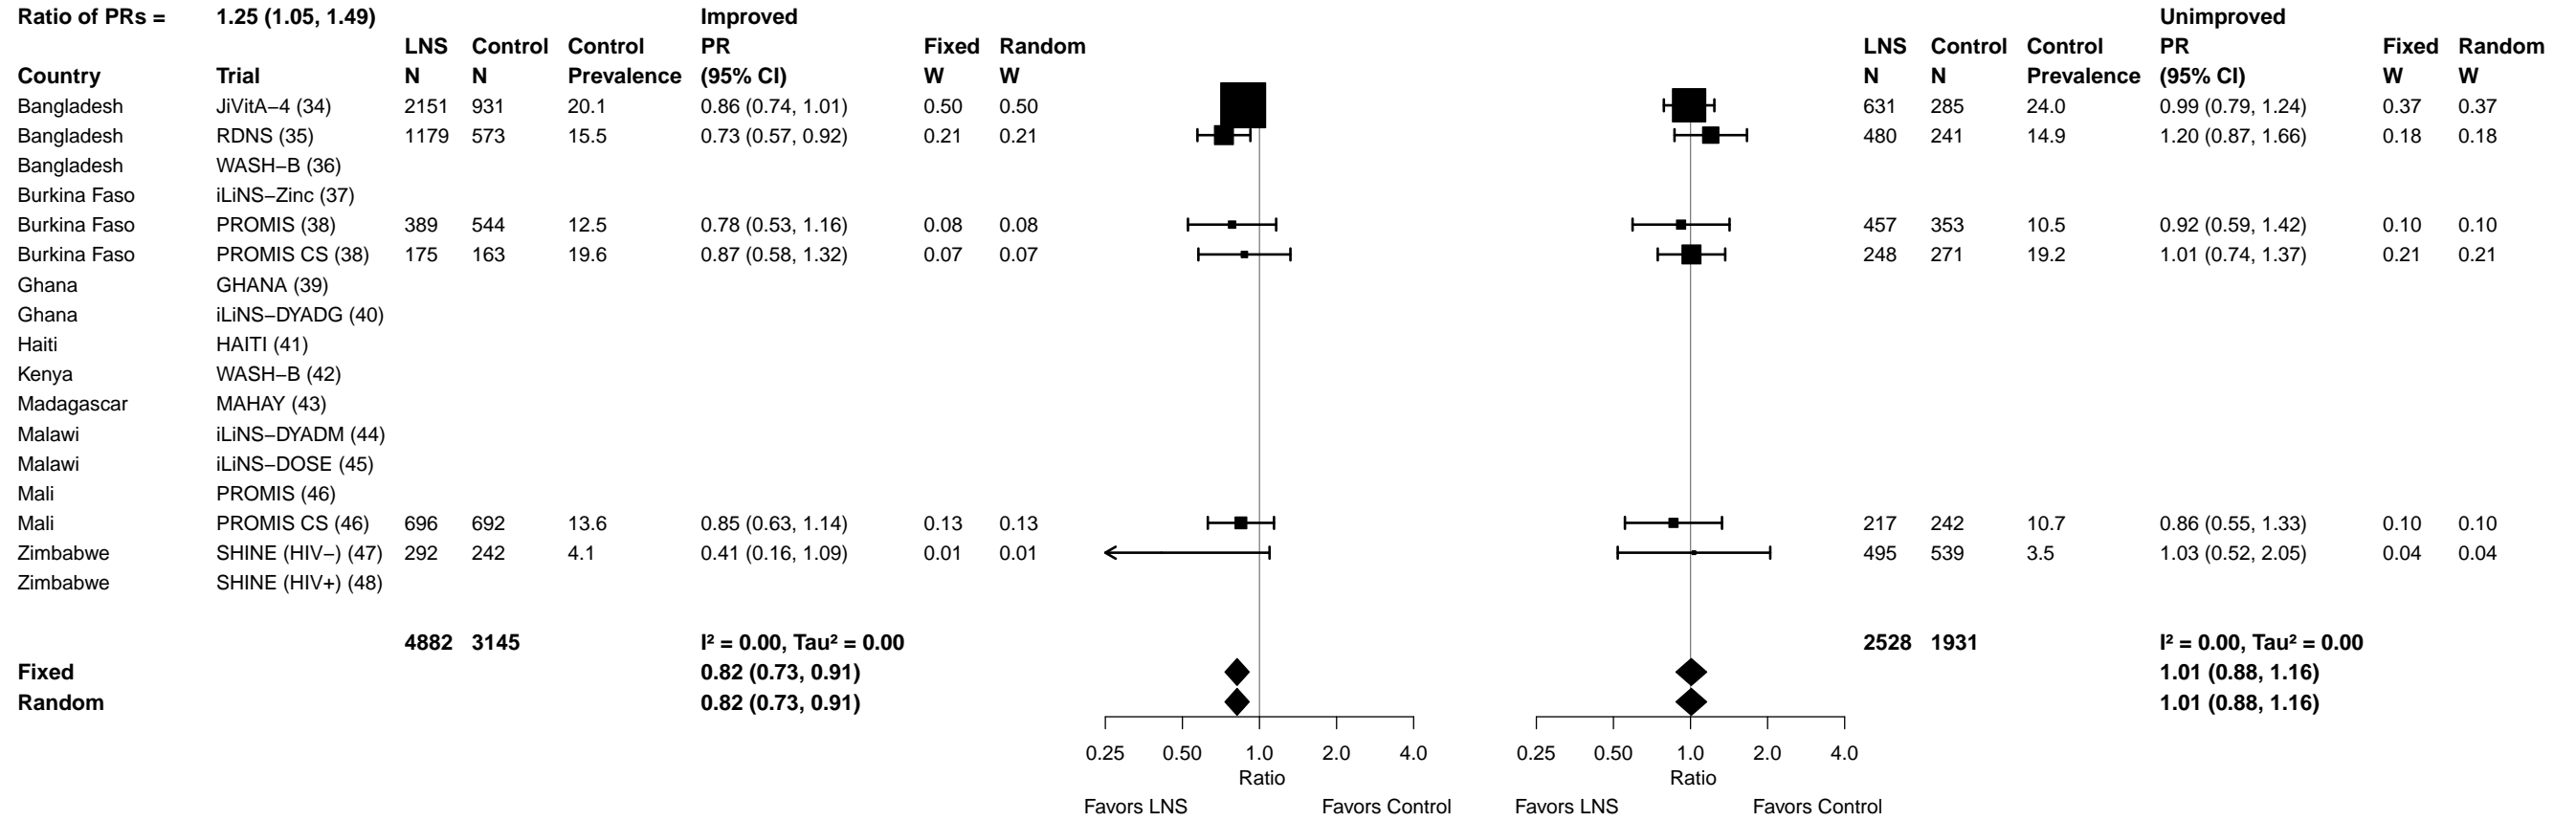



Supplemental figure 7J: Acute malnutrition prevalence ratio

7J5: Stratified by Home environment

P-for-interaction = 0.310

Ratio of PRs = 1.14 (0.89, 1.45)

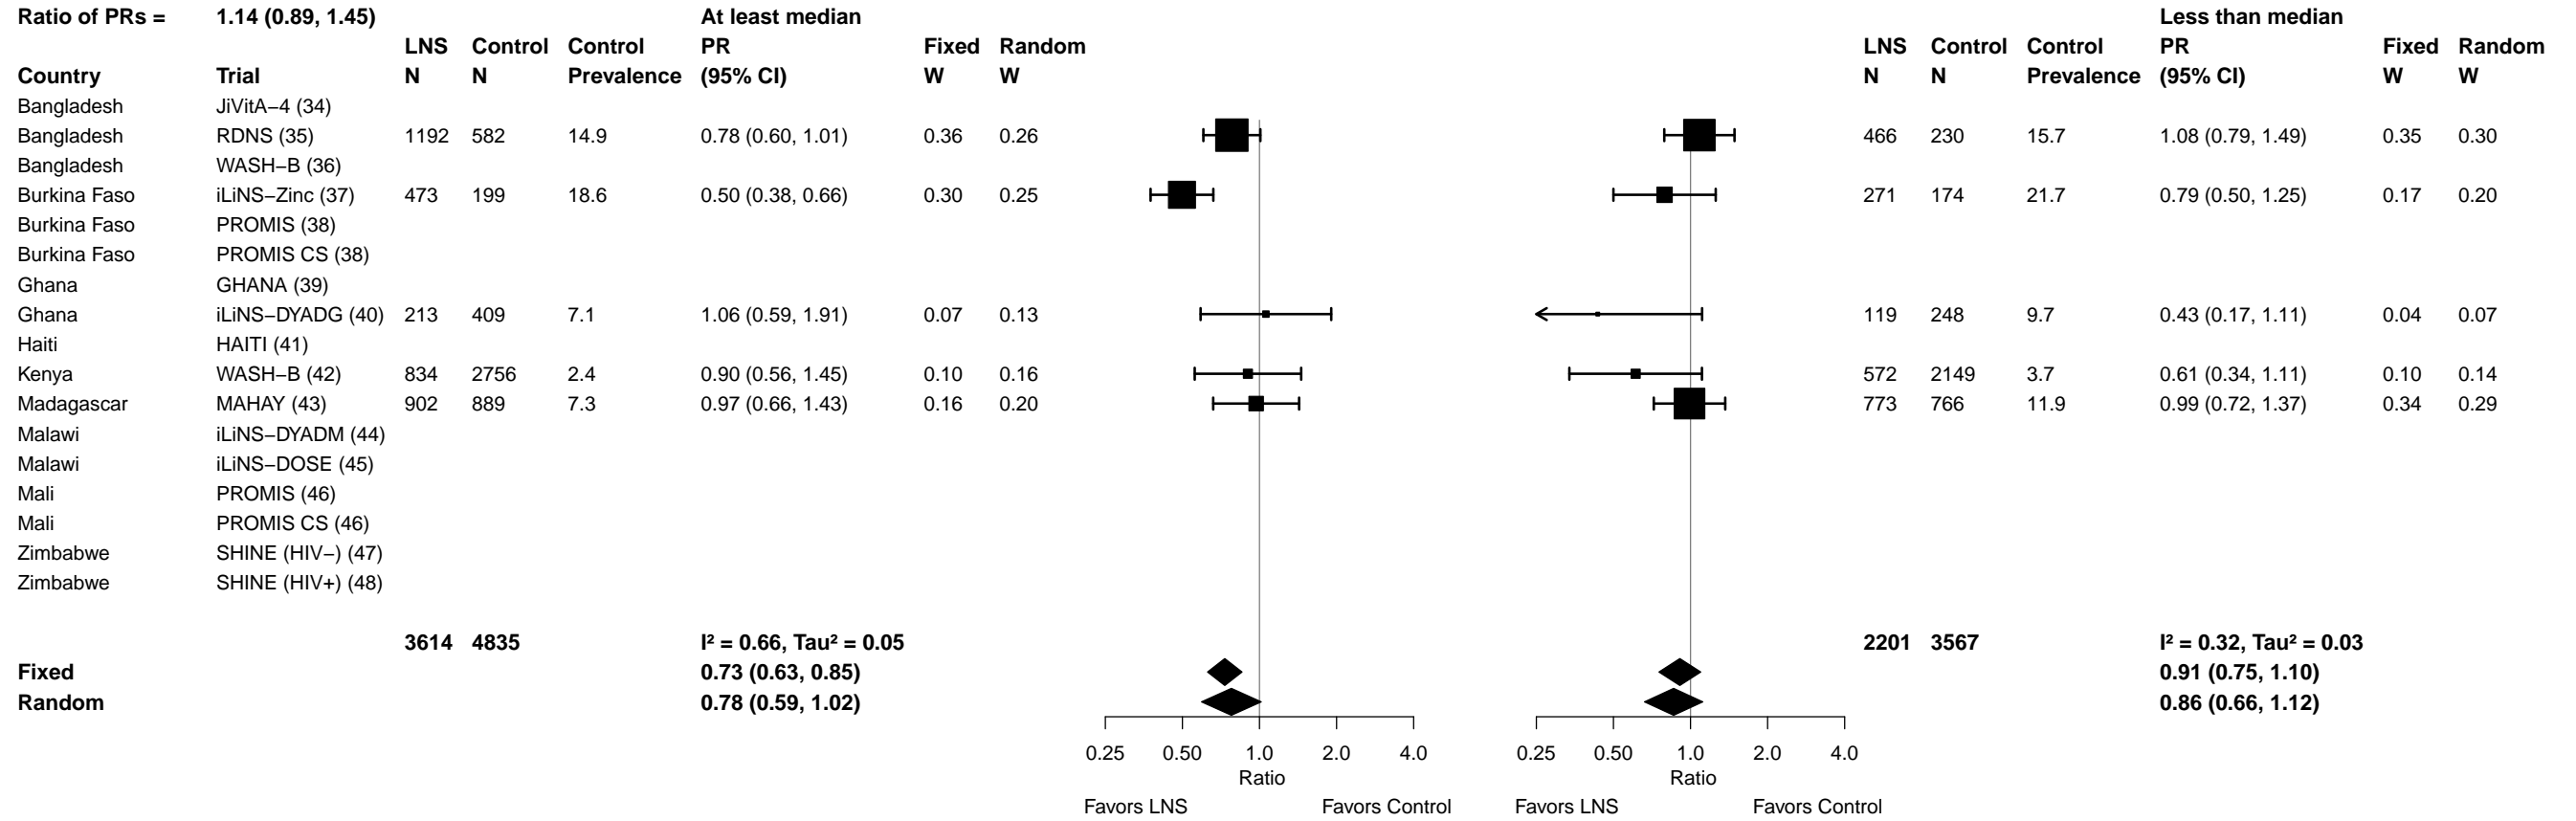

Supplemental figure 7J: Acute malnutrition prevalence ratio

7J6: Stratified by Season at the time of assessment

P-for-interaction = 0.172

Ratio of PRs = 1.12 (0.95, 1.32)

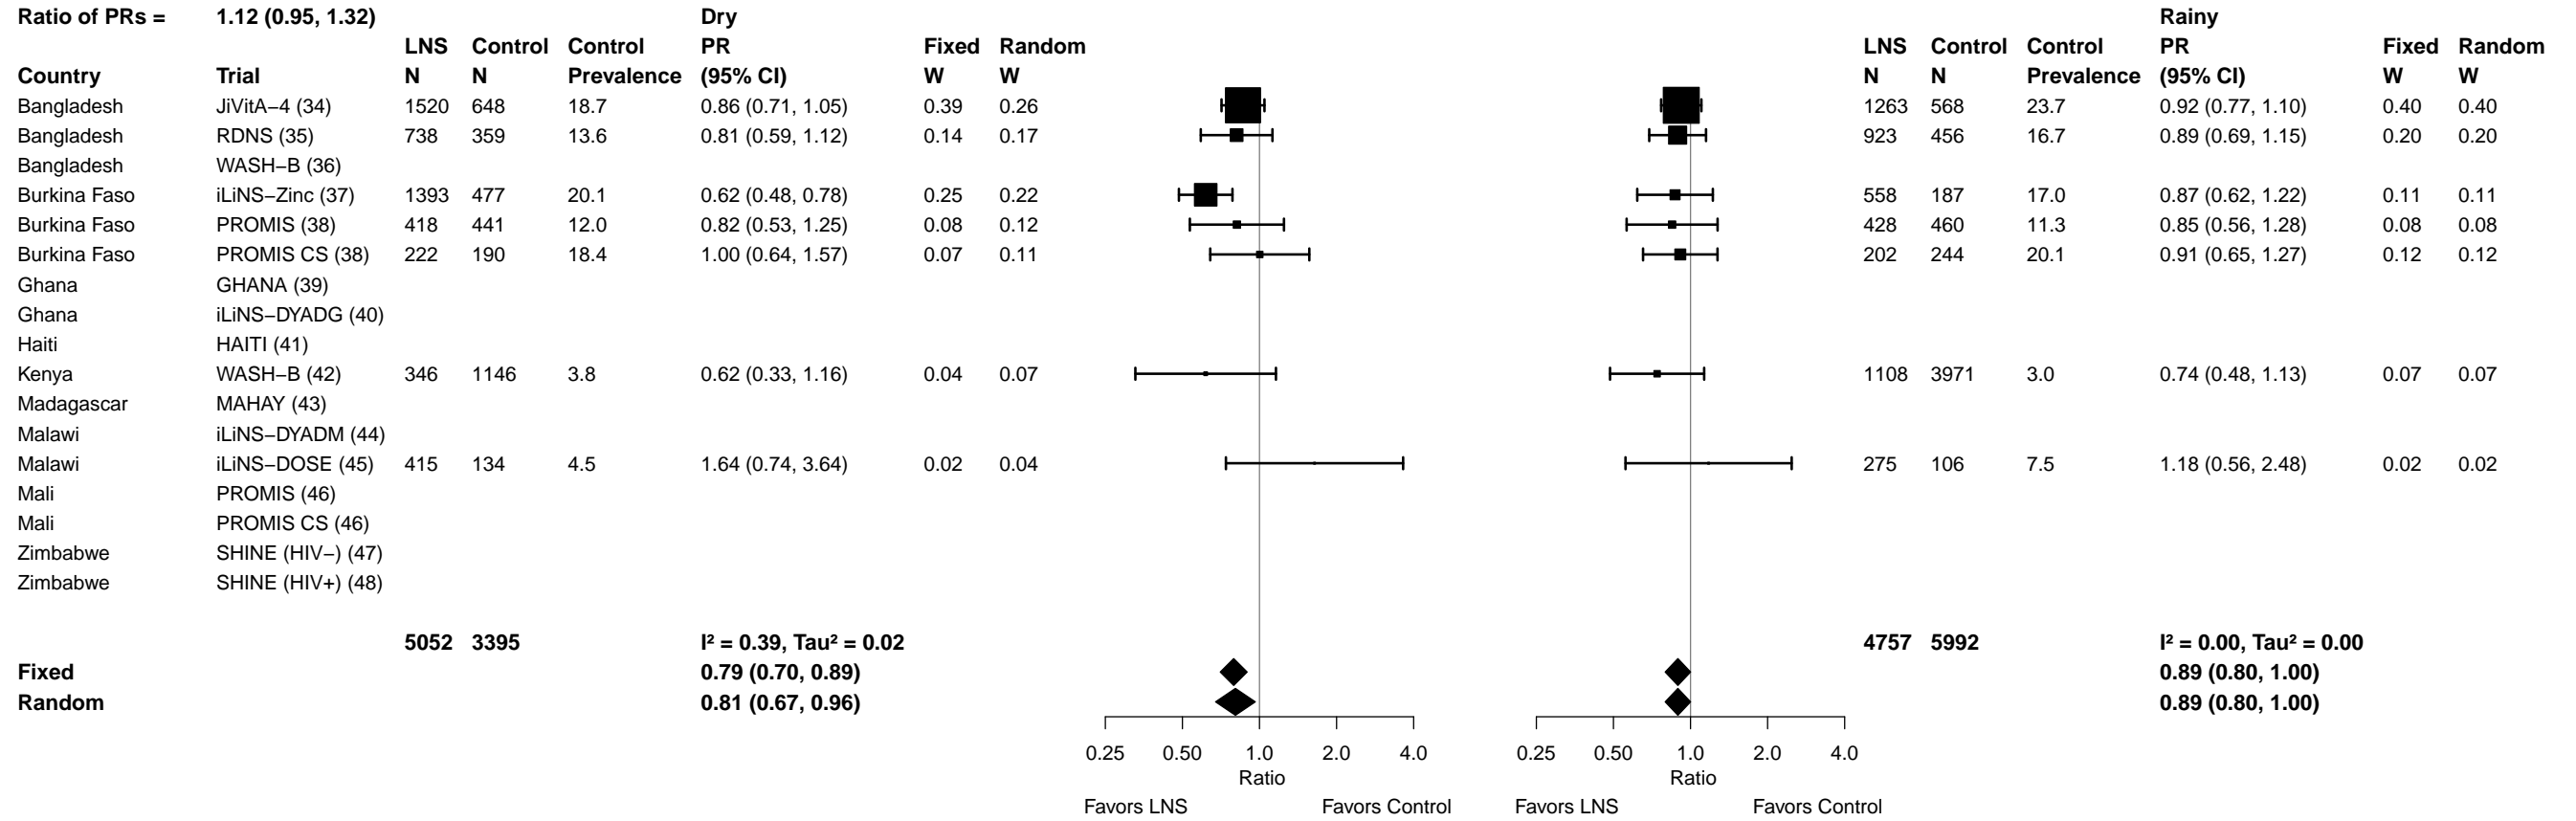

### Supplemental figure 7K: Acute malnutrition prevalence difference

#### 7K1: Stratified by Household socio-economic status

P-for-interaction = 0.197

Difference in PDs = -0.01 (-0.02, 0.00)

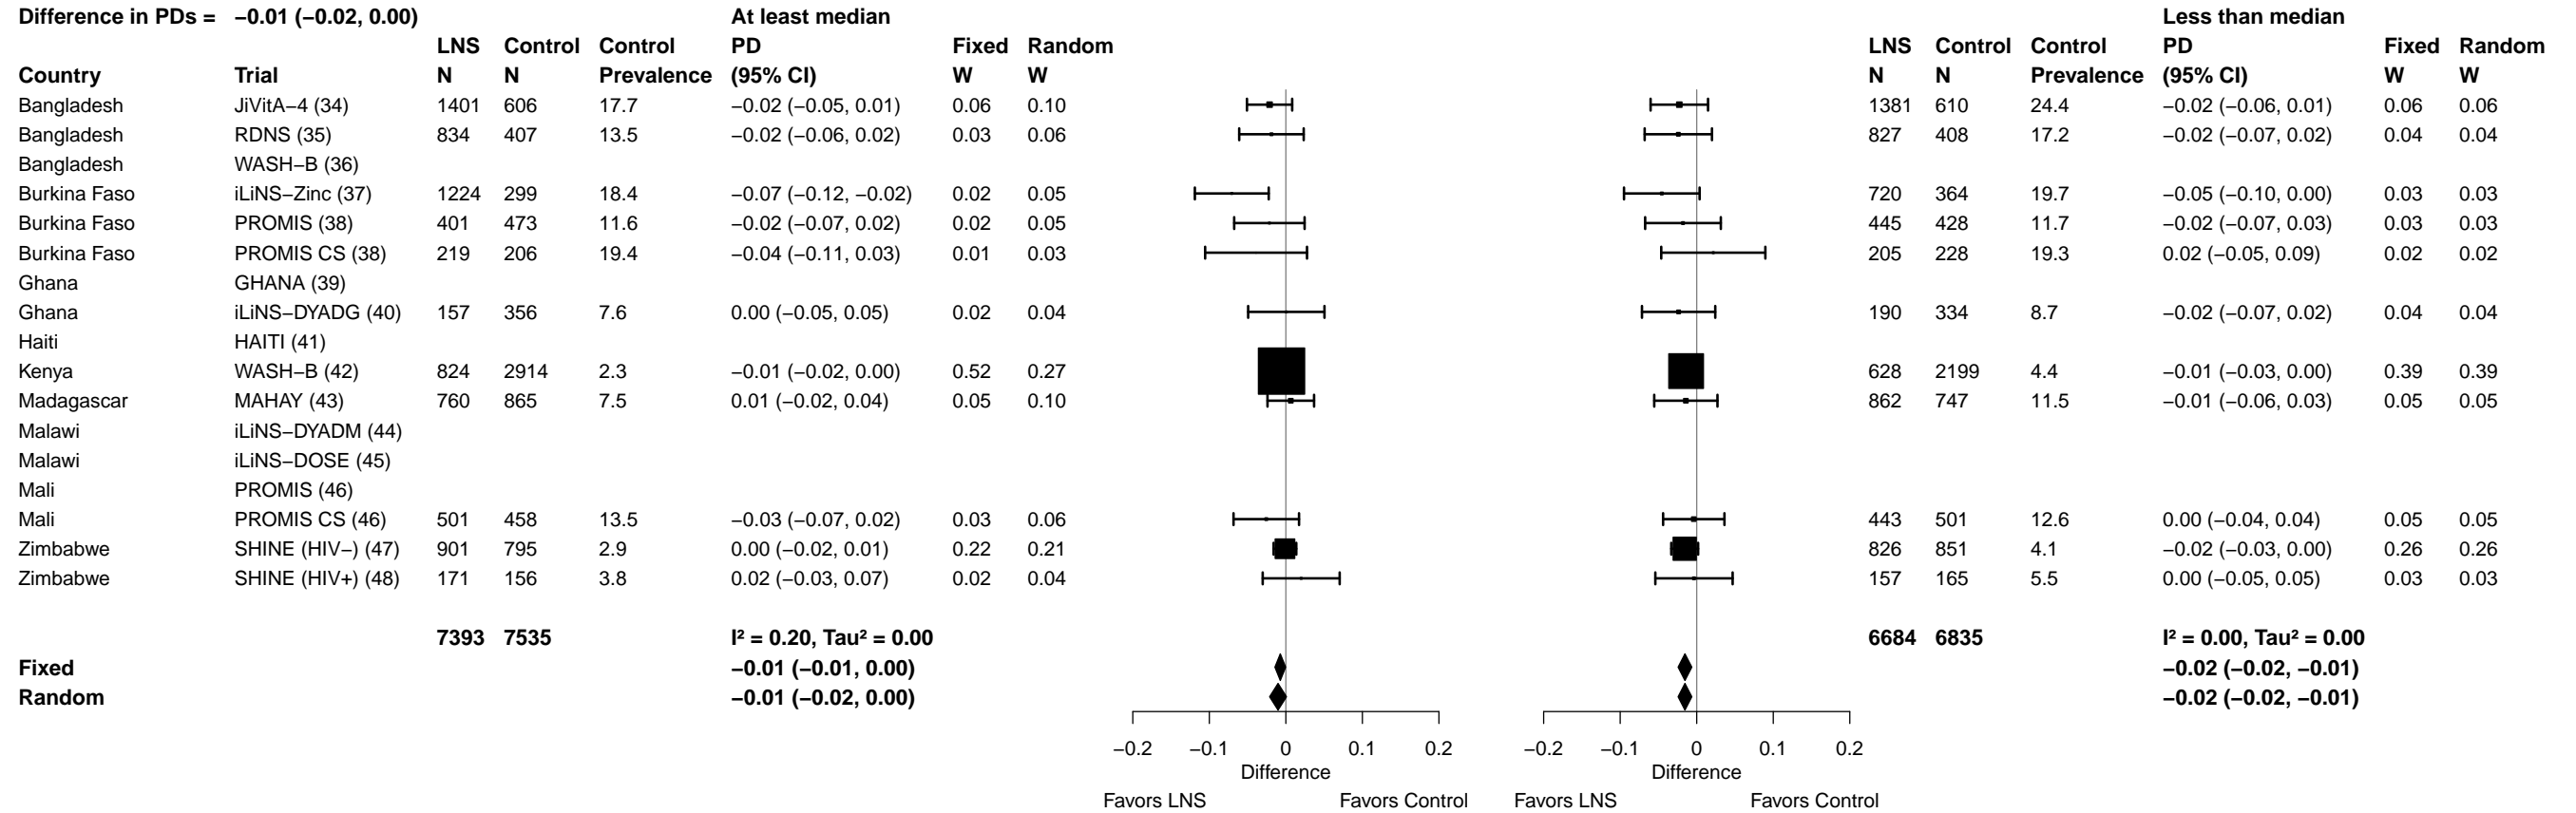

Supplemental figure 7K: Acute malnutrition prevalence difference

7K2: Stratified by Household food insecurity

P-for-interaction = 0.074

Difference in PDs = -0.02 (-0.04, 0.00)

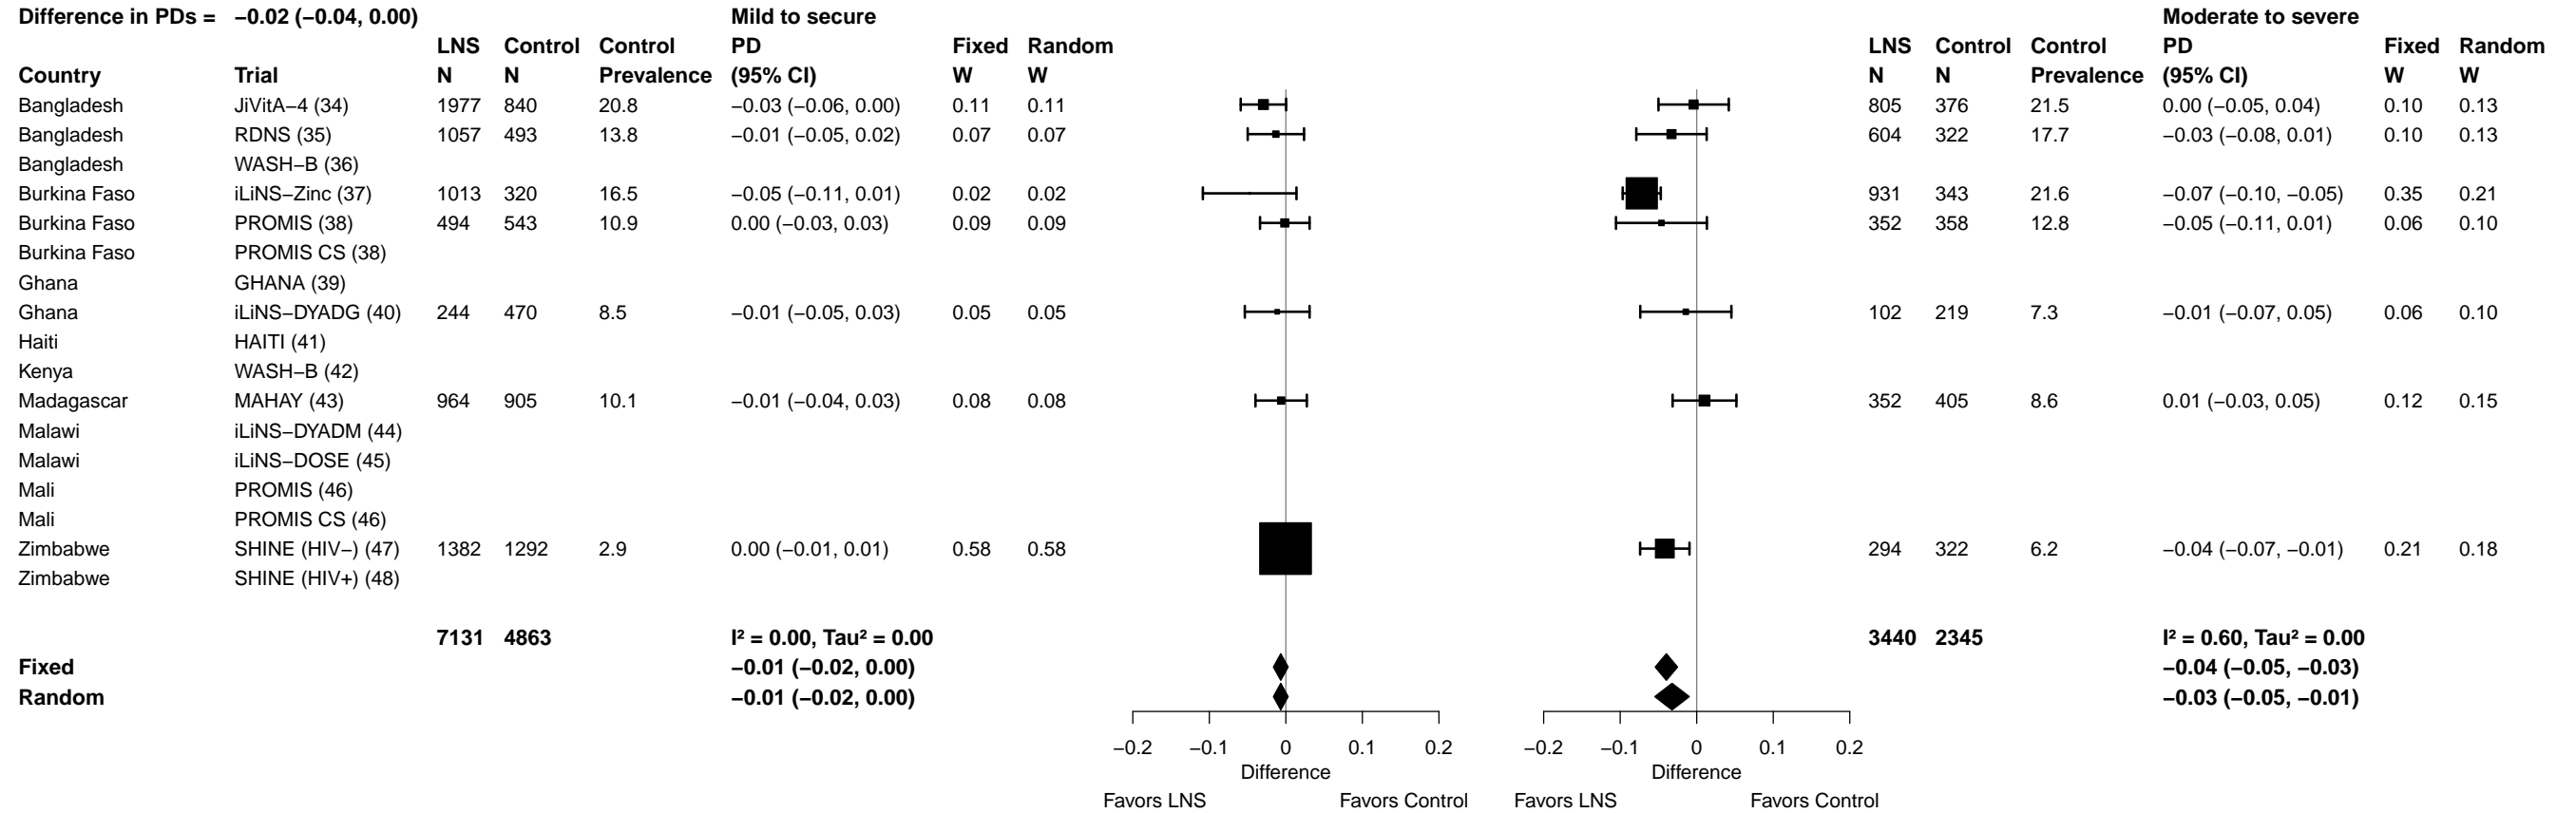

Supplemental figure 7K: Acute malnutrition prevalence difference

7K3: Stratified by Household source water quality

P-for-interaction = 0.574

Difference in PDs = -0.01 (-0.03, 0.02)

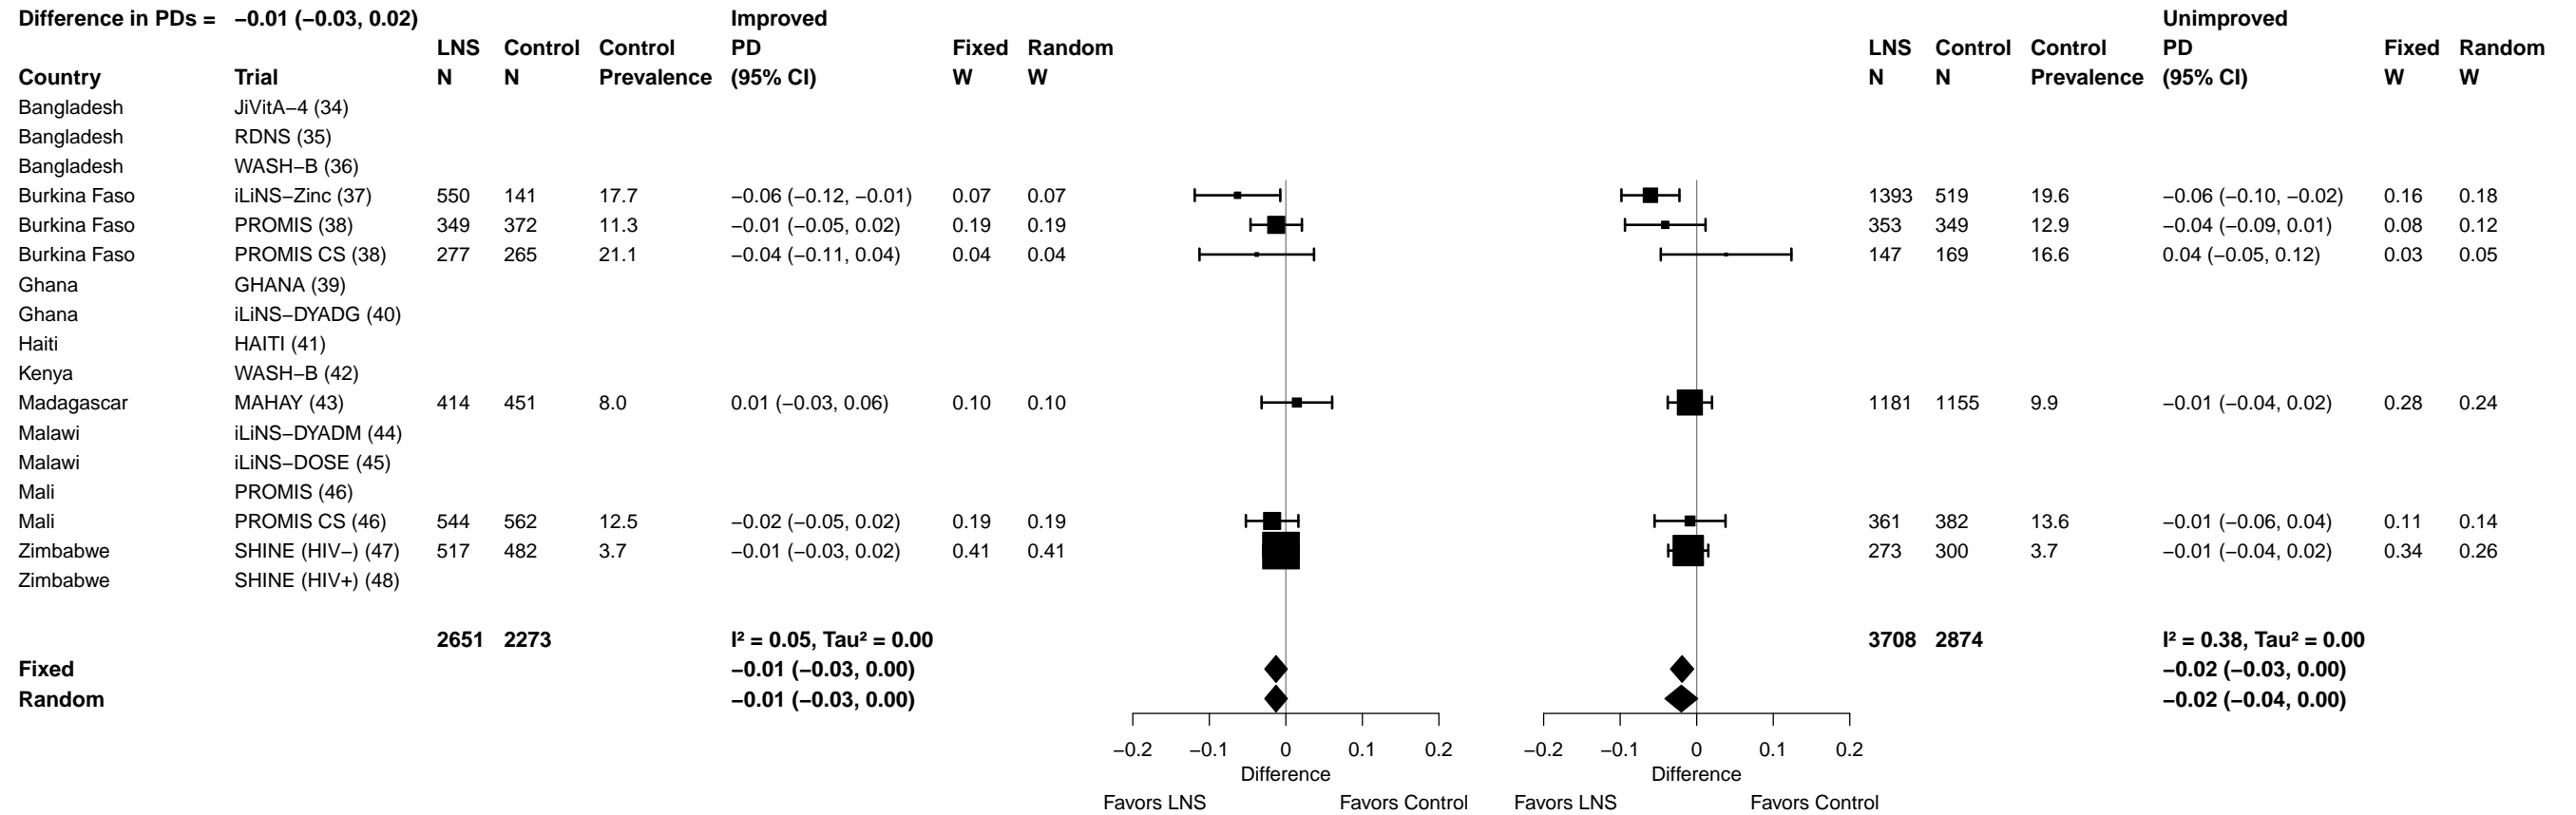

Supplemental figure 7K: Acute malnutrition prevalence difference

7K4: Stratified by Household sanitation

**P-for-interaction = 0.016**  
**Difference in PDs = 0.03 (0.01, 0.05)**

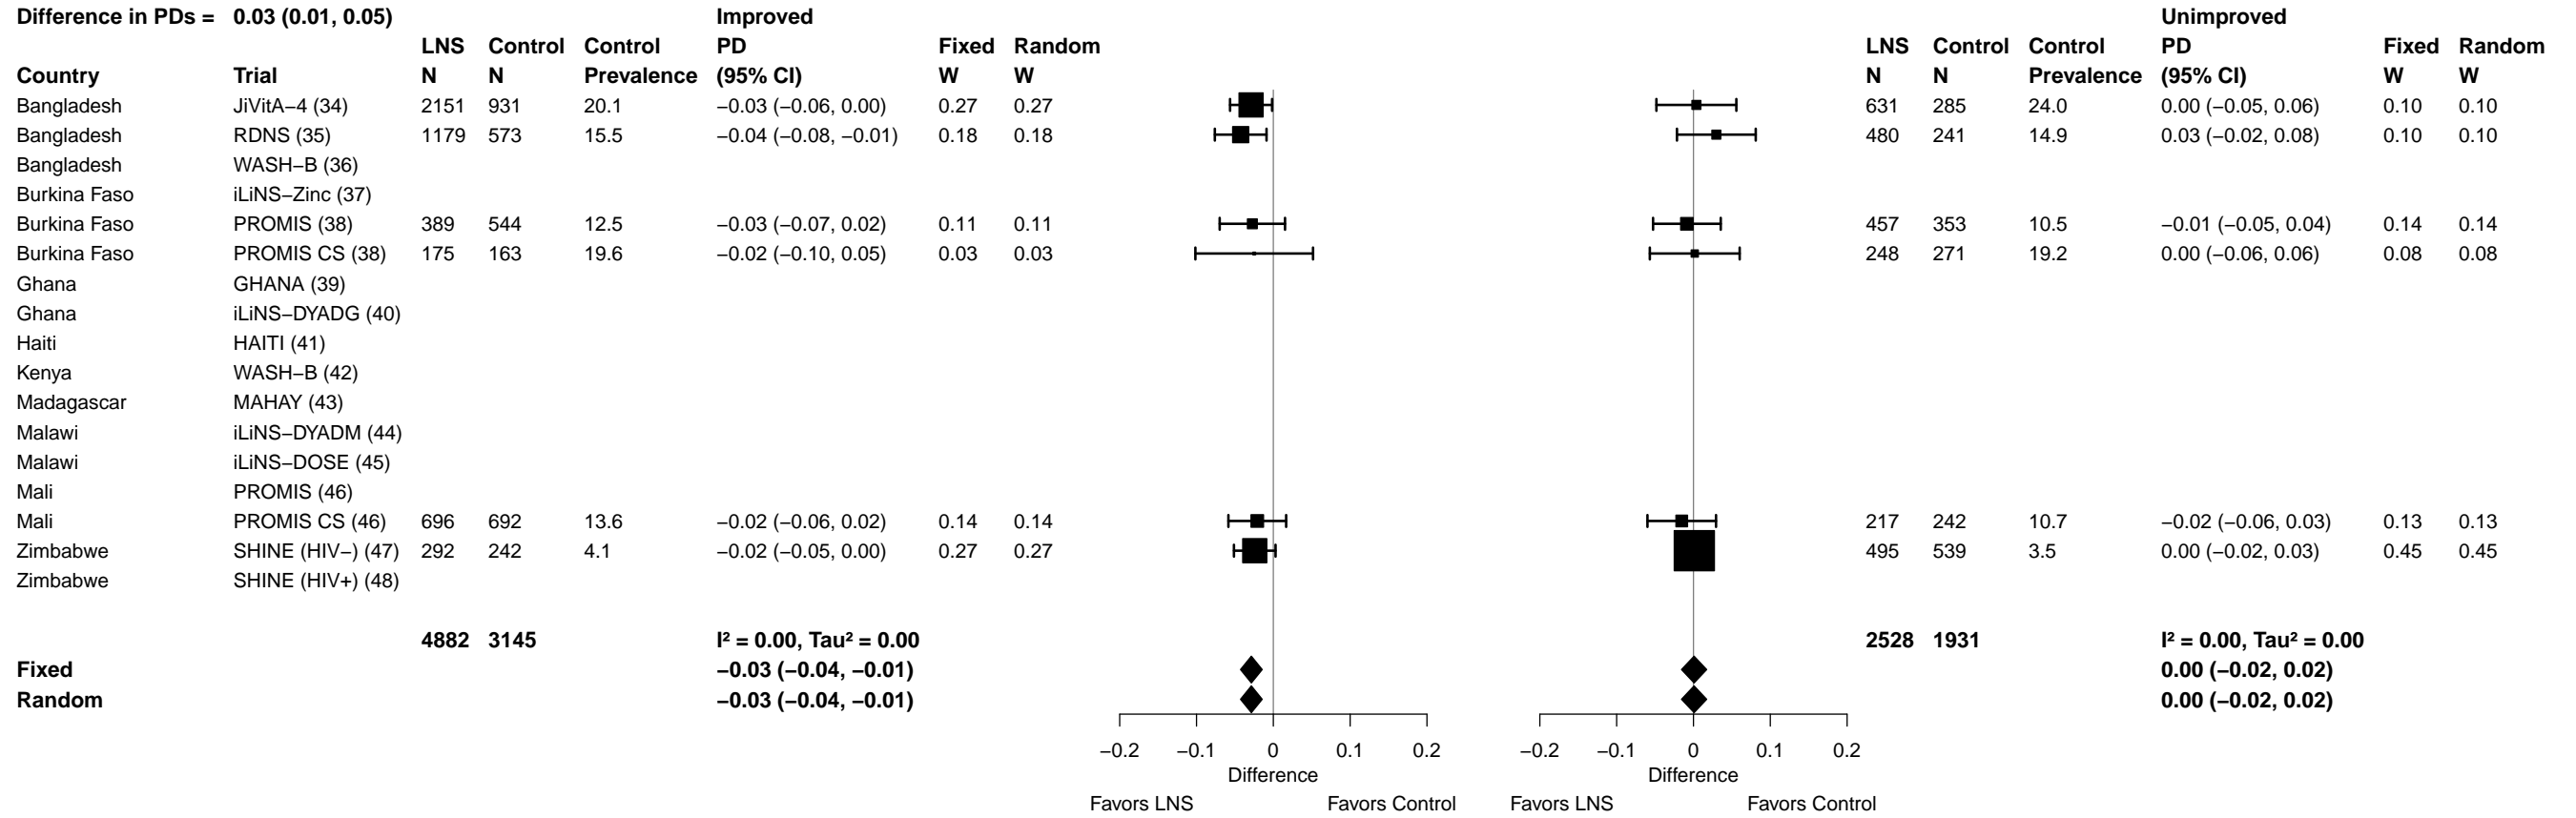

Supplemental figure 7K: Acute malnutrition prevalence difference

7K5: Stratified by Home environment

P-for-interaction = 0.318

Difference in PDs = -0.01 (-0.02, 0.01)

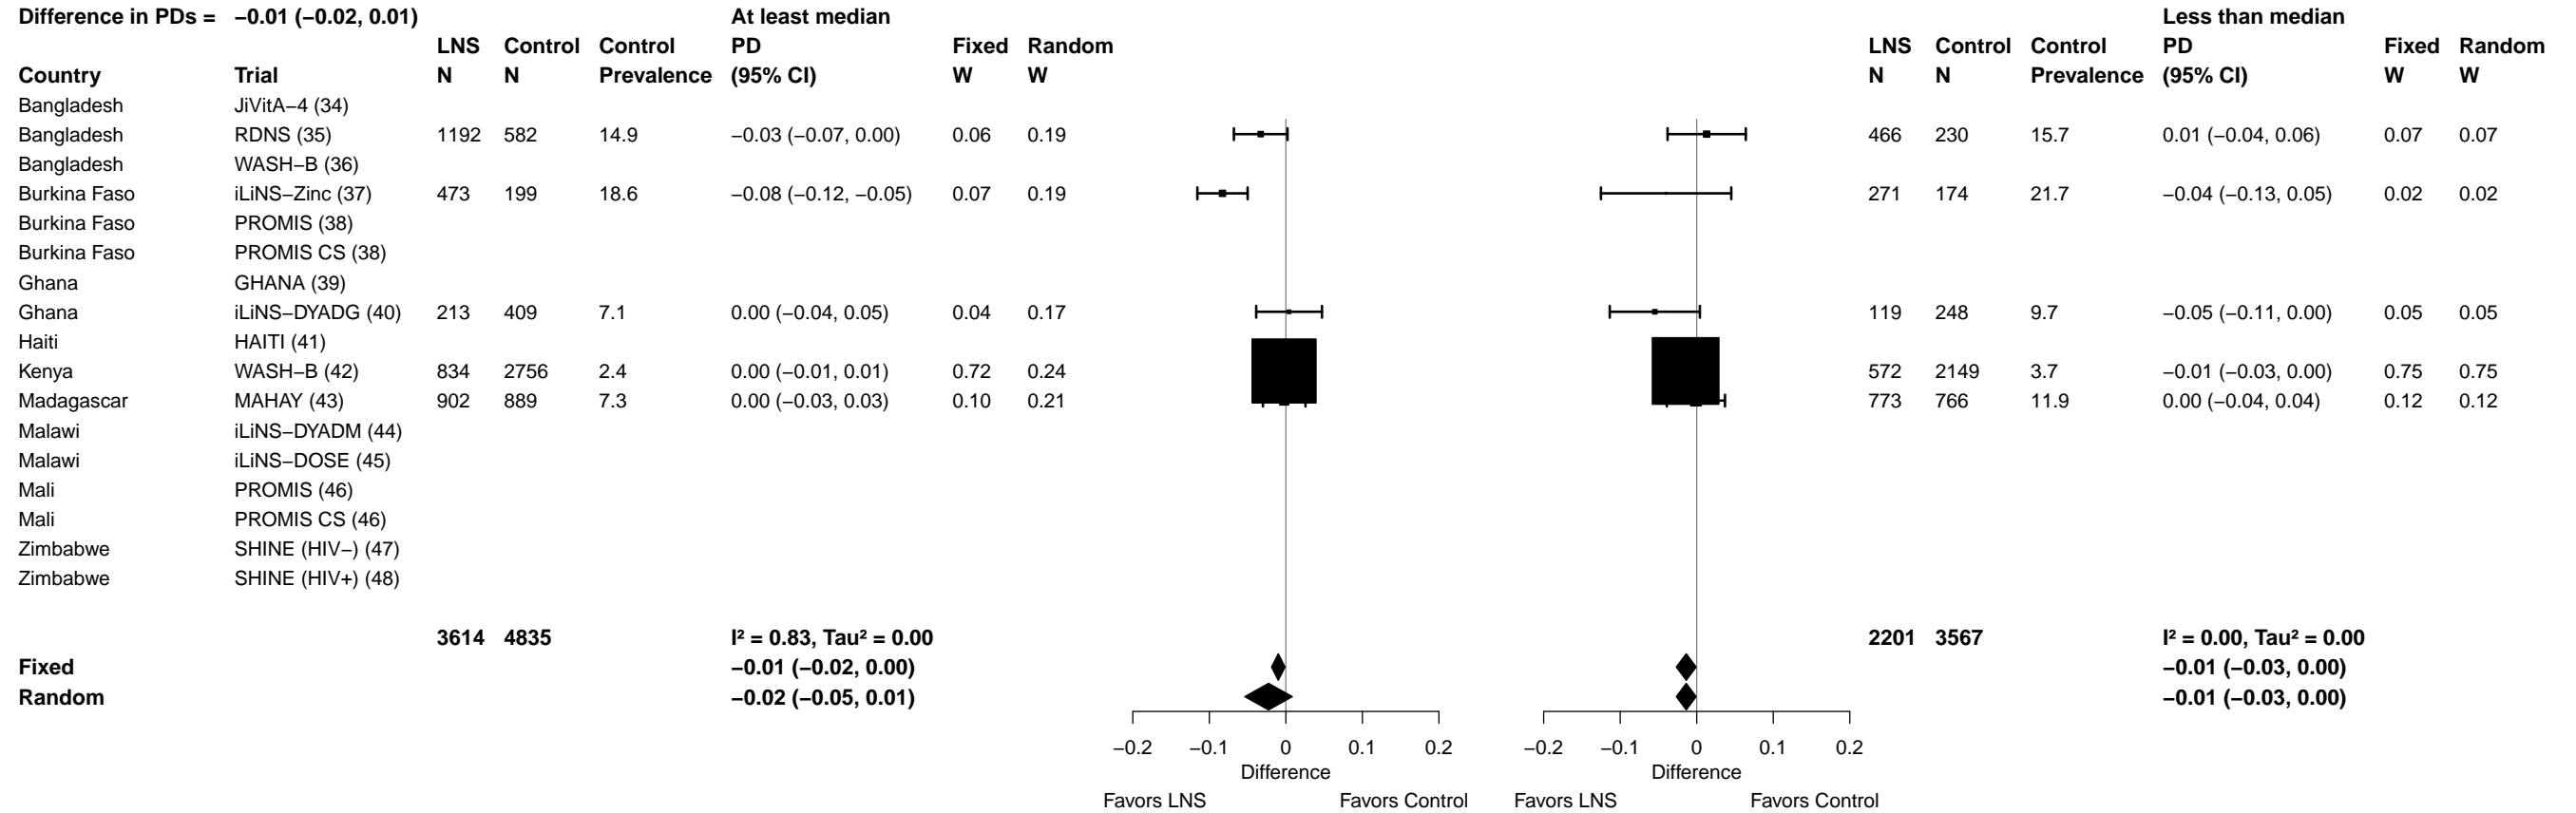

Supplemental figure 7K: Acute malnutrition prevalence difference

7K6: Stratified by Season at the time of assessment

P-for-interaction = 0.534

Difference in PDs = 0.01 (-0.01, 0.02)

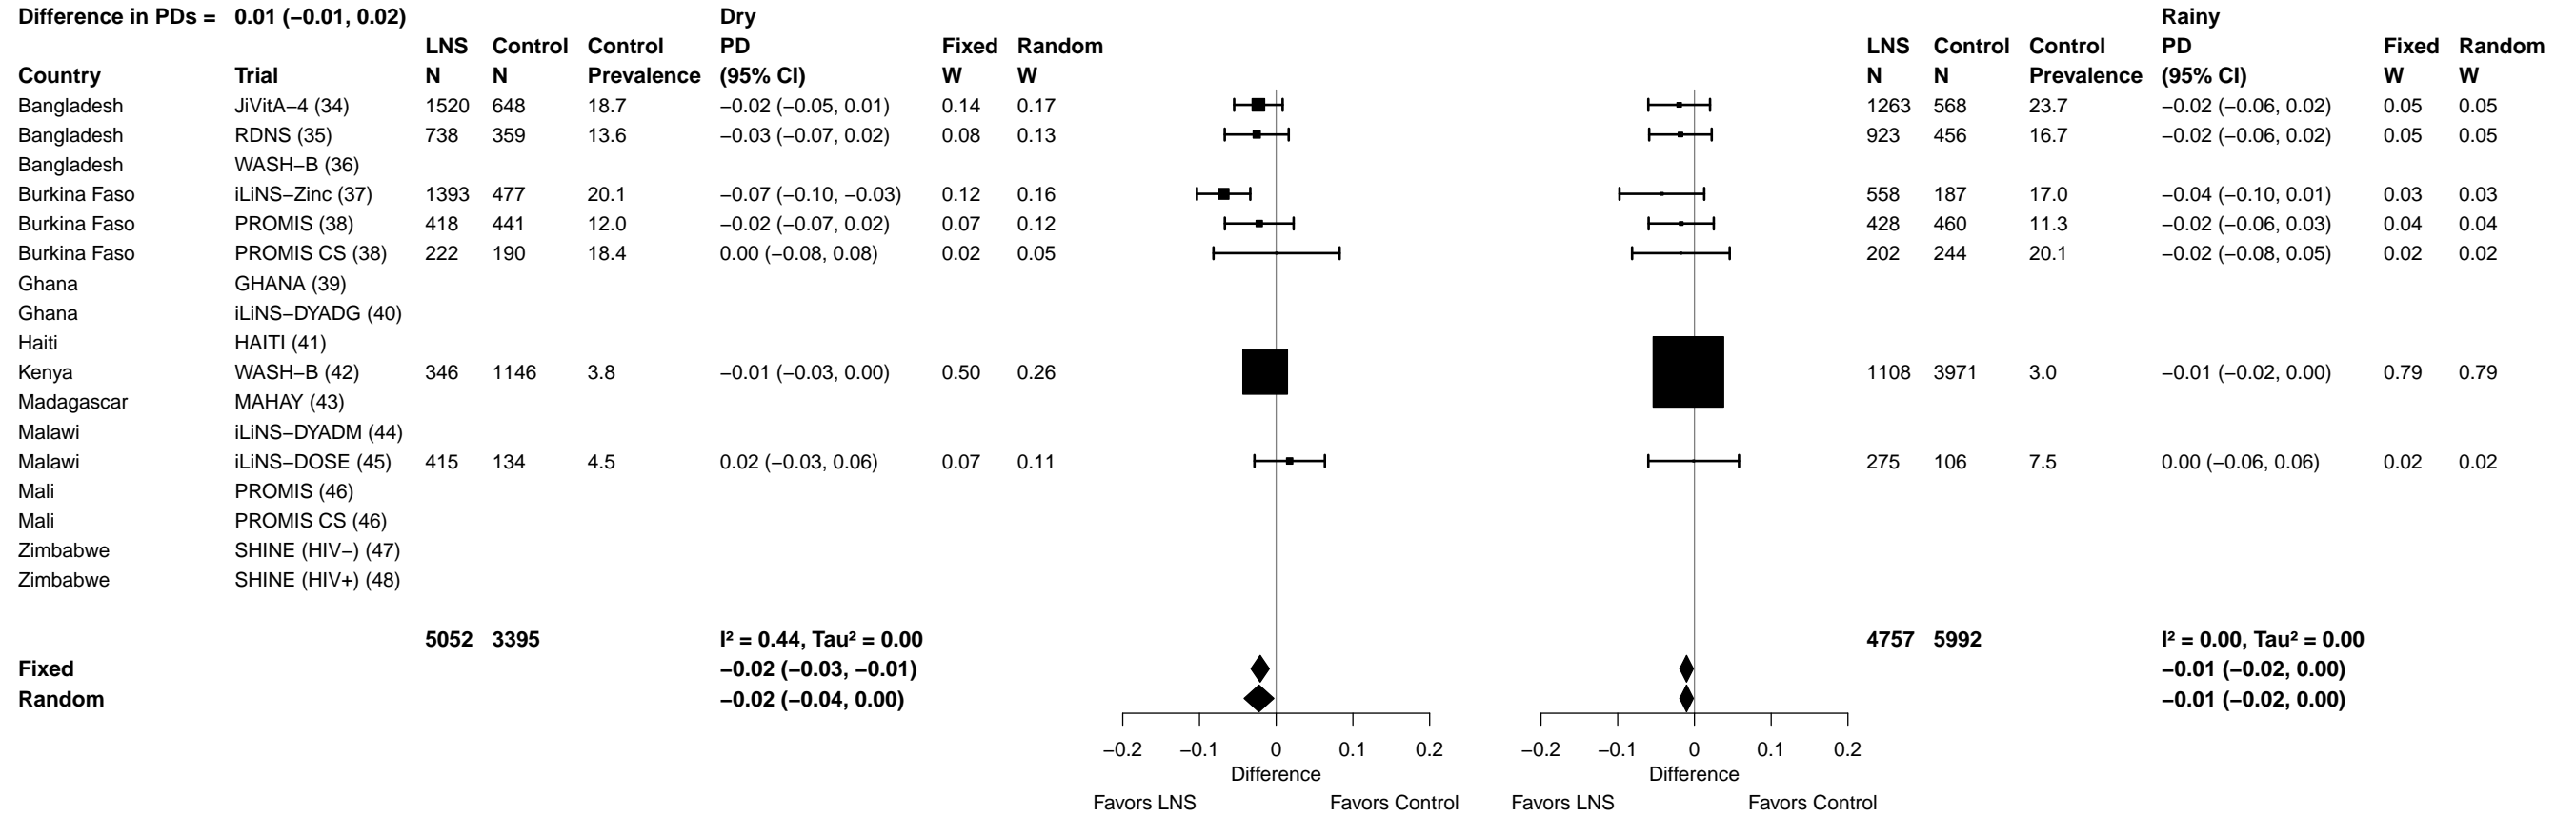



### Supplemental figure 7L: Mean difference in WAZ

#### 7L1: Stratified by Household socio-economic status

P-for-interaction = 0.954  
 Difference in MDs = 0.00 (-0.03, 0.04)

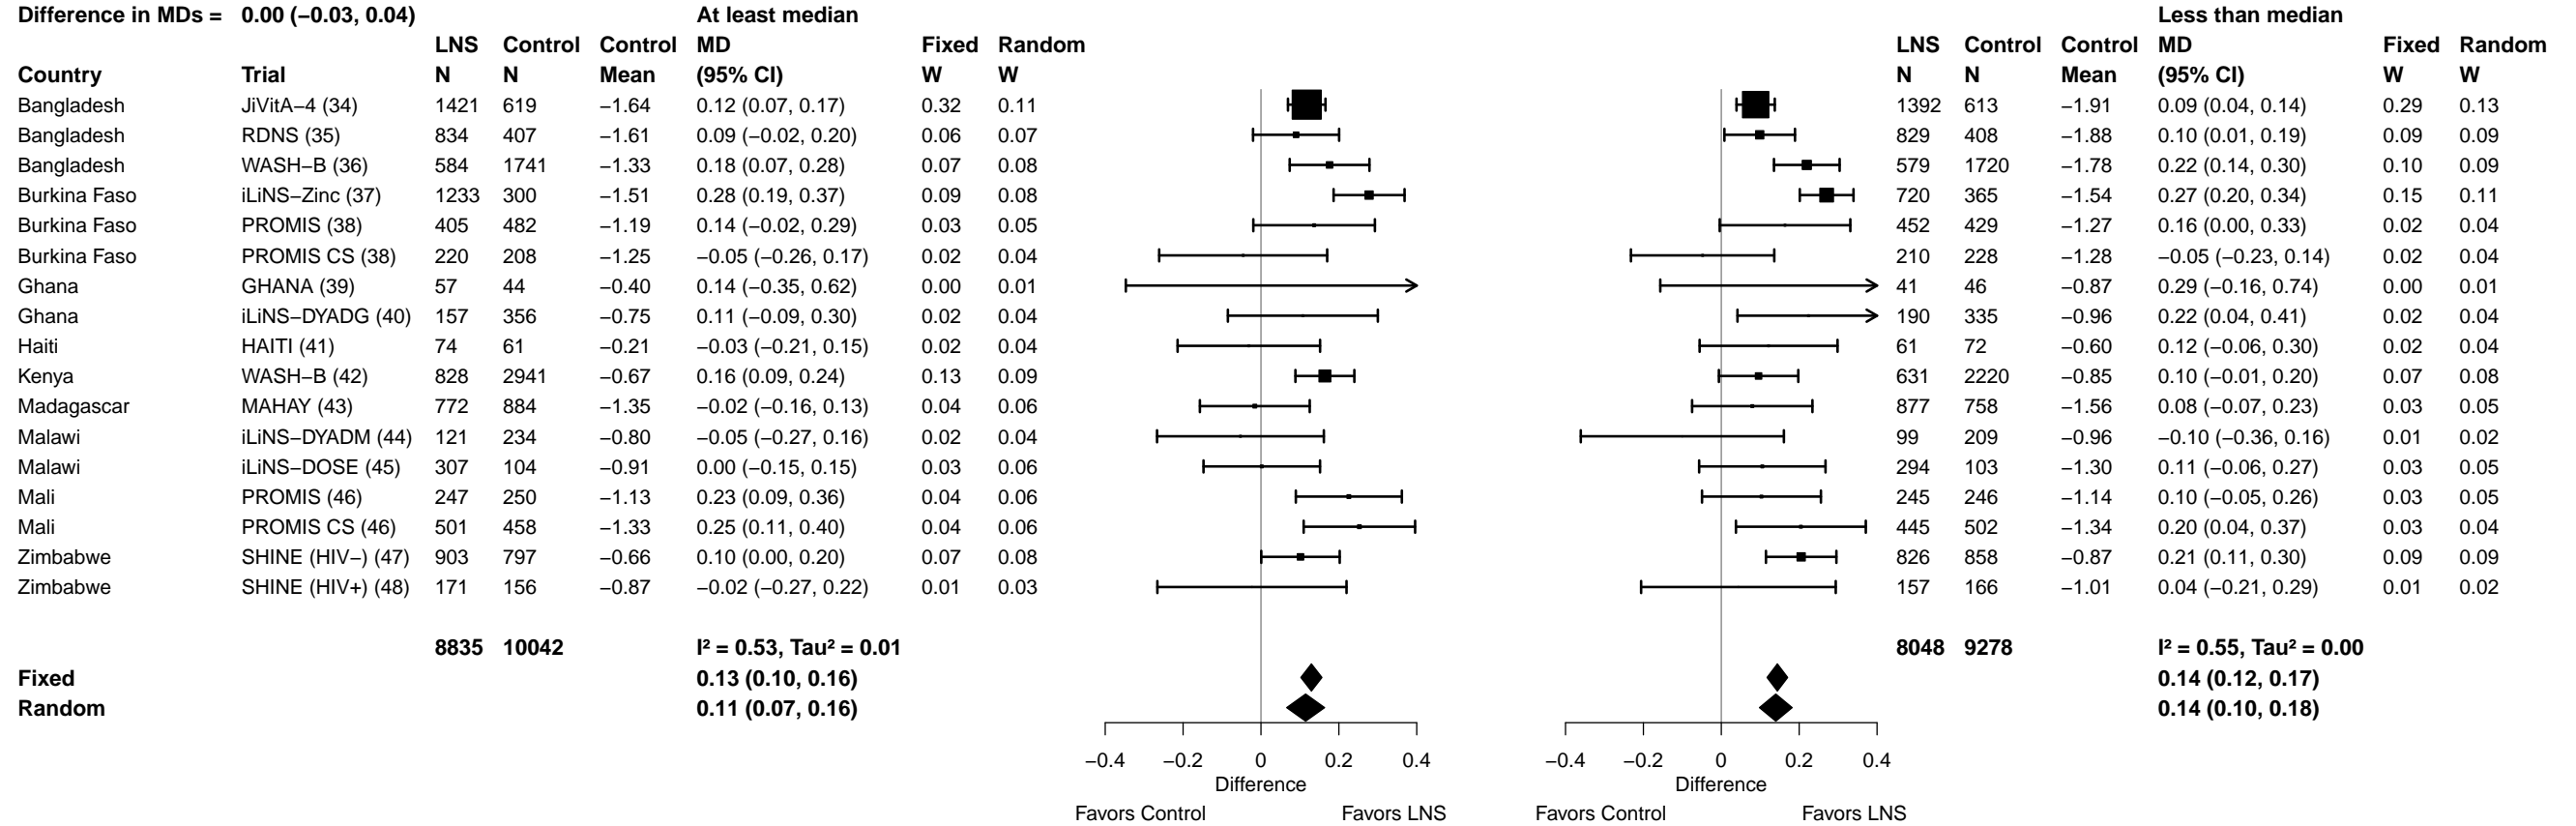

Supplemental figure 7L: Mean difference in WAZ

7L2: Stratified by Household food insecurity

P-for-interaction = 0.751

Difference in MDs = -0.01 (-0.05, 0.04)

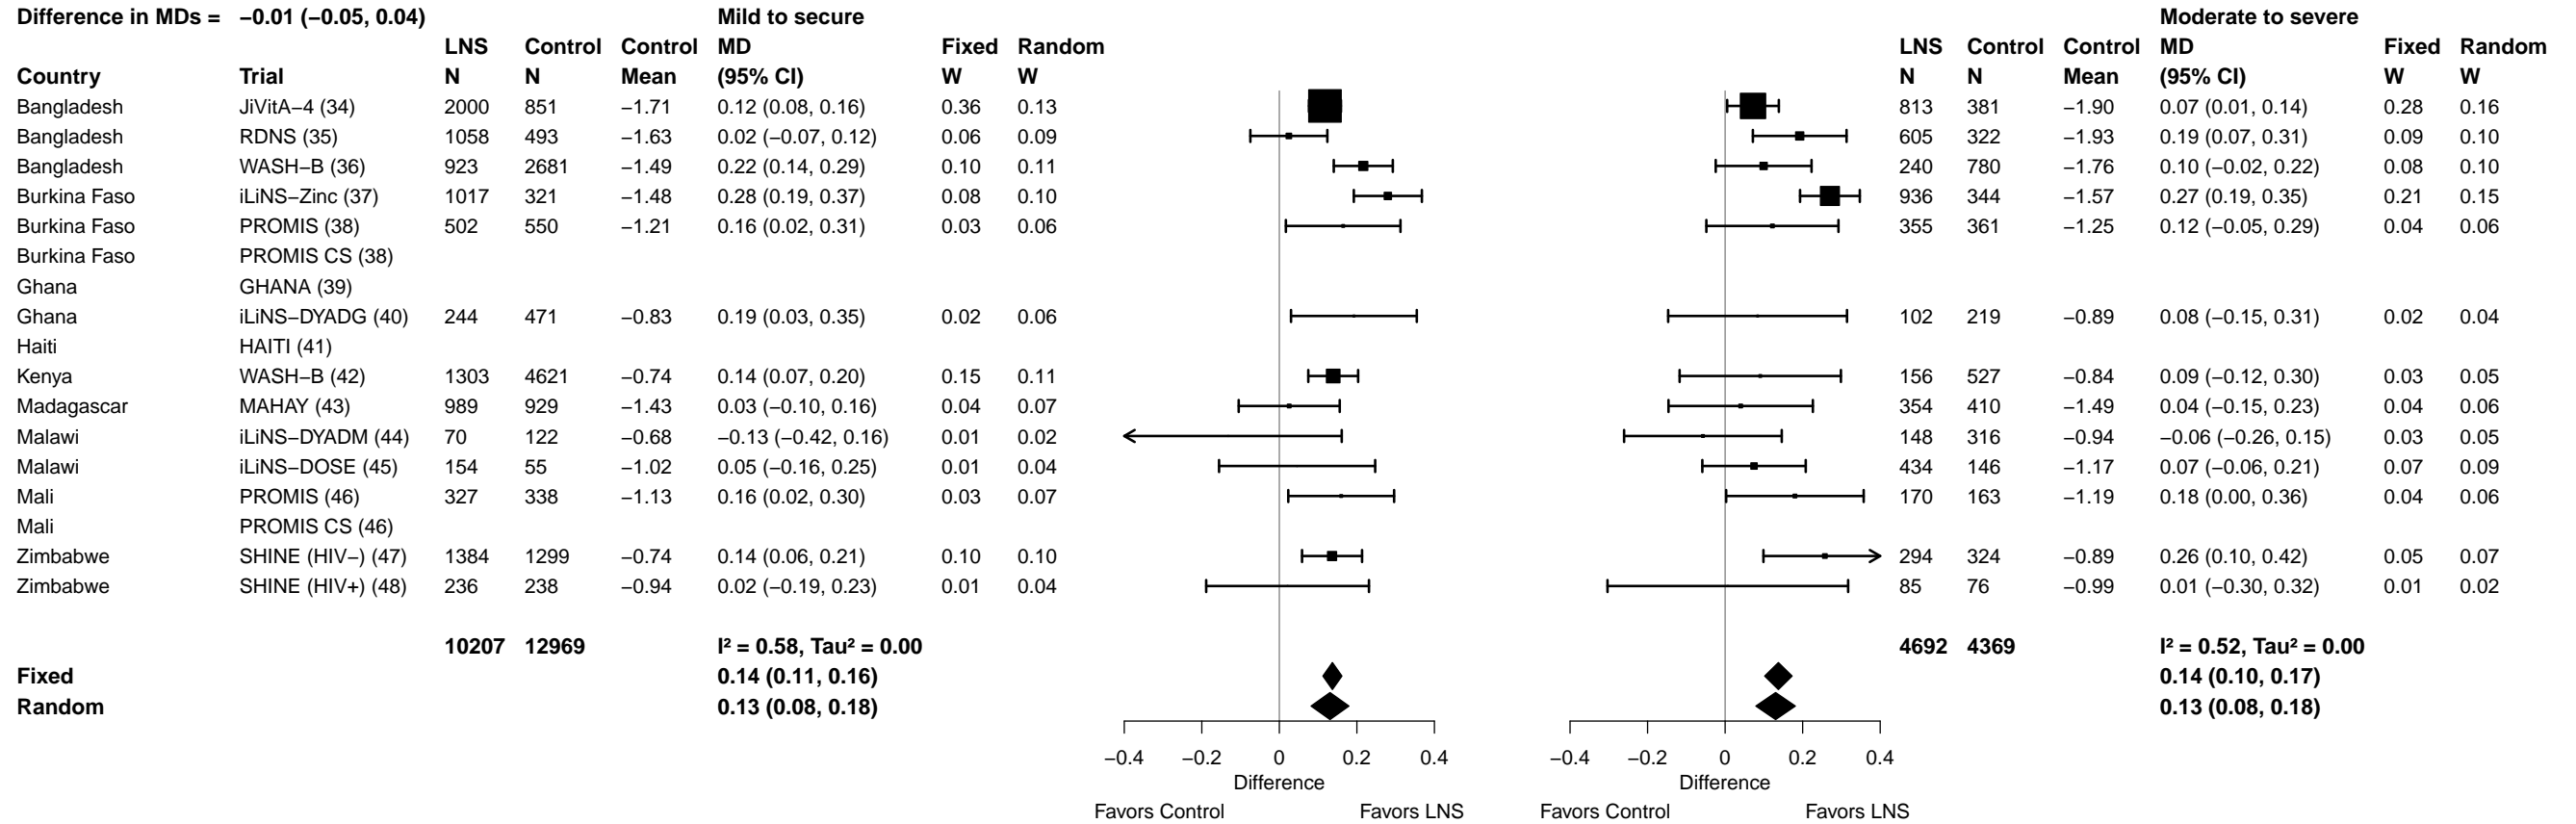



Supplemental figure 7L: Mean difference in WAZ

7L4: Stratified by Household sanitation

P-for-interaction = 0.035

Difference in MDs = -0.06 (-0.11, 0.00)

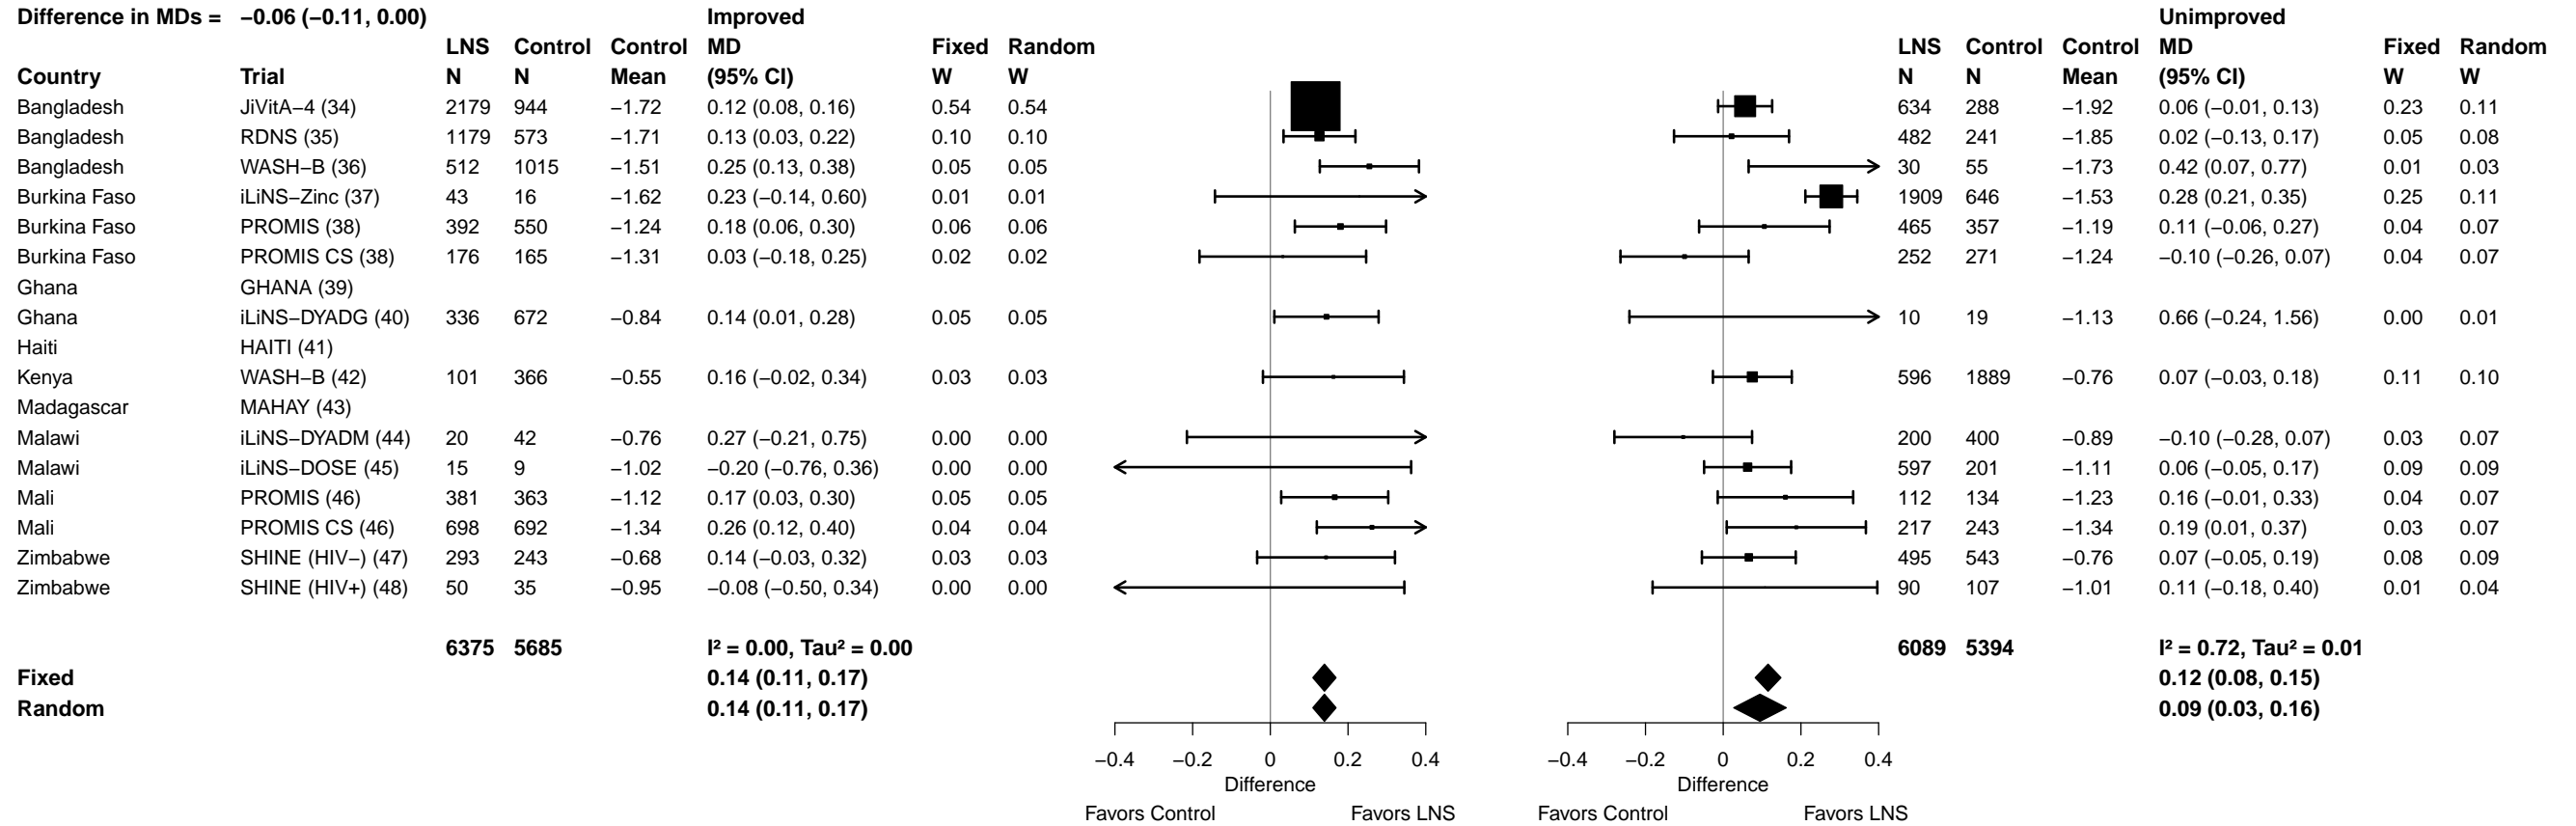

Supplemental figure 7L: Mean difference in WAZ

7L5: Stratified by Home environment

P-for-interaction = 0.076

Difference in MDs = 0.06 (-0.01, 0.12)

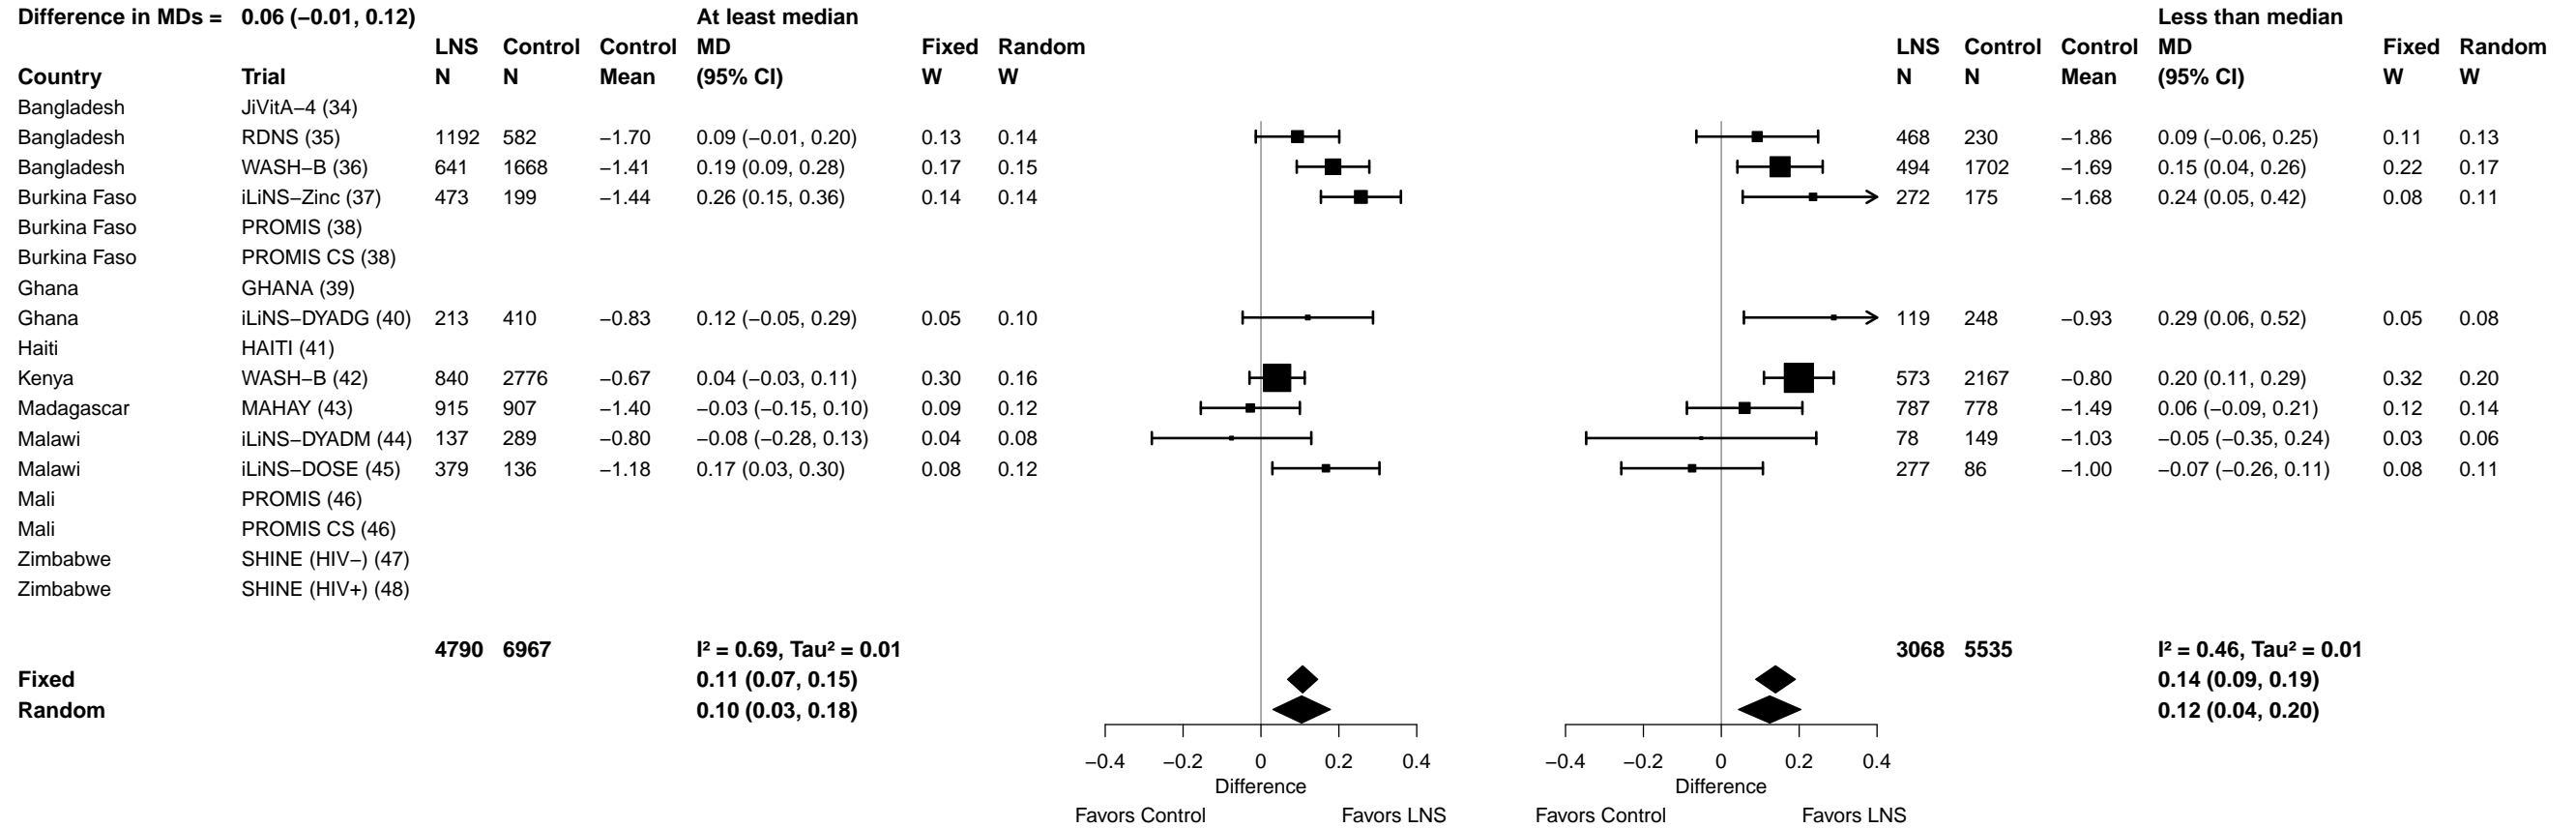

Supplemental figure 7L: Mean difference in WAZ

7L6: Stratified by Season at the time of assessment

P-for-interaction = 0.212

Difference in MDs = -0.03 (-0.07, 0.02)

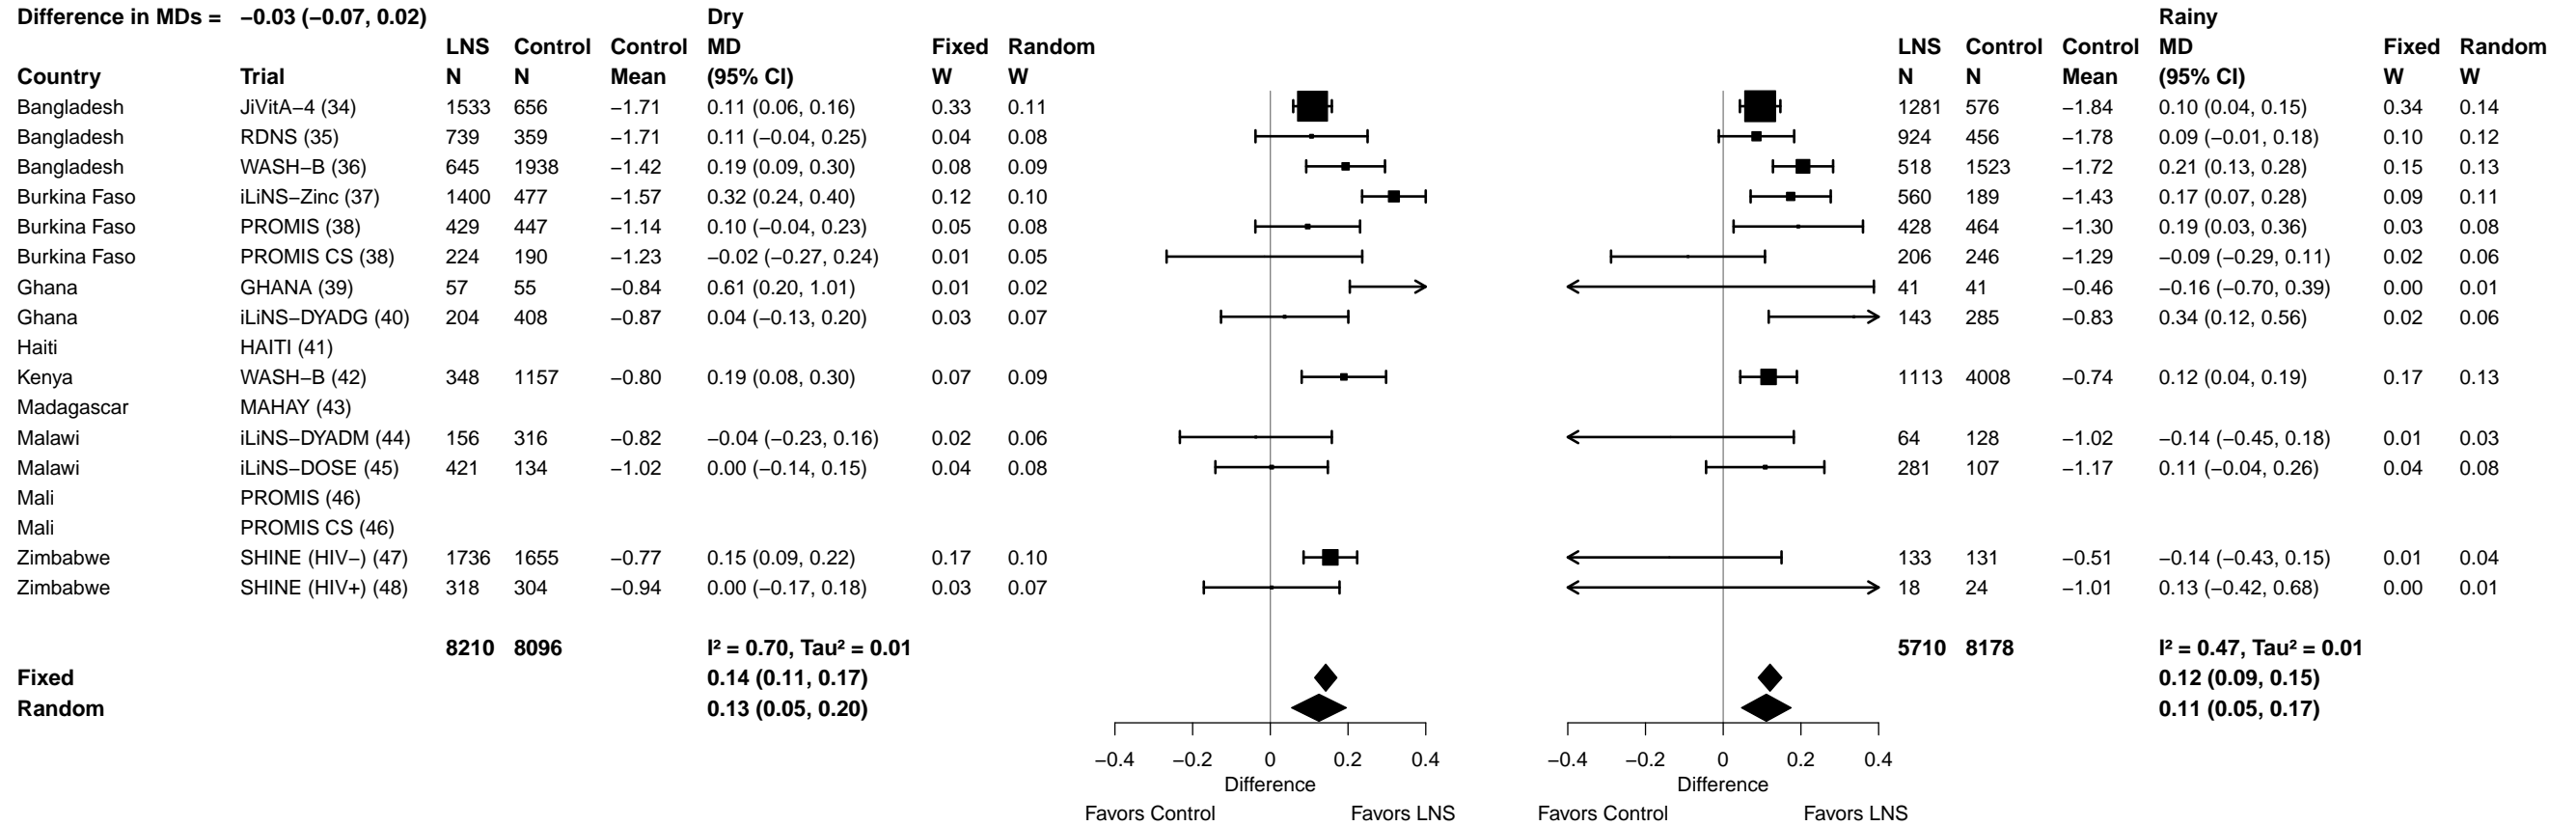

### Supplemental figure 7M: Underweight prevalence ratio

#### 7M1: Stratified by Household socio-economic status

**P-for-interaction = 0.877**  
**Ratio of PRs = 1.01 (0.93, 1.09)**

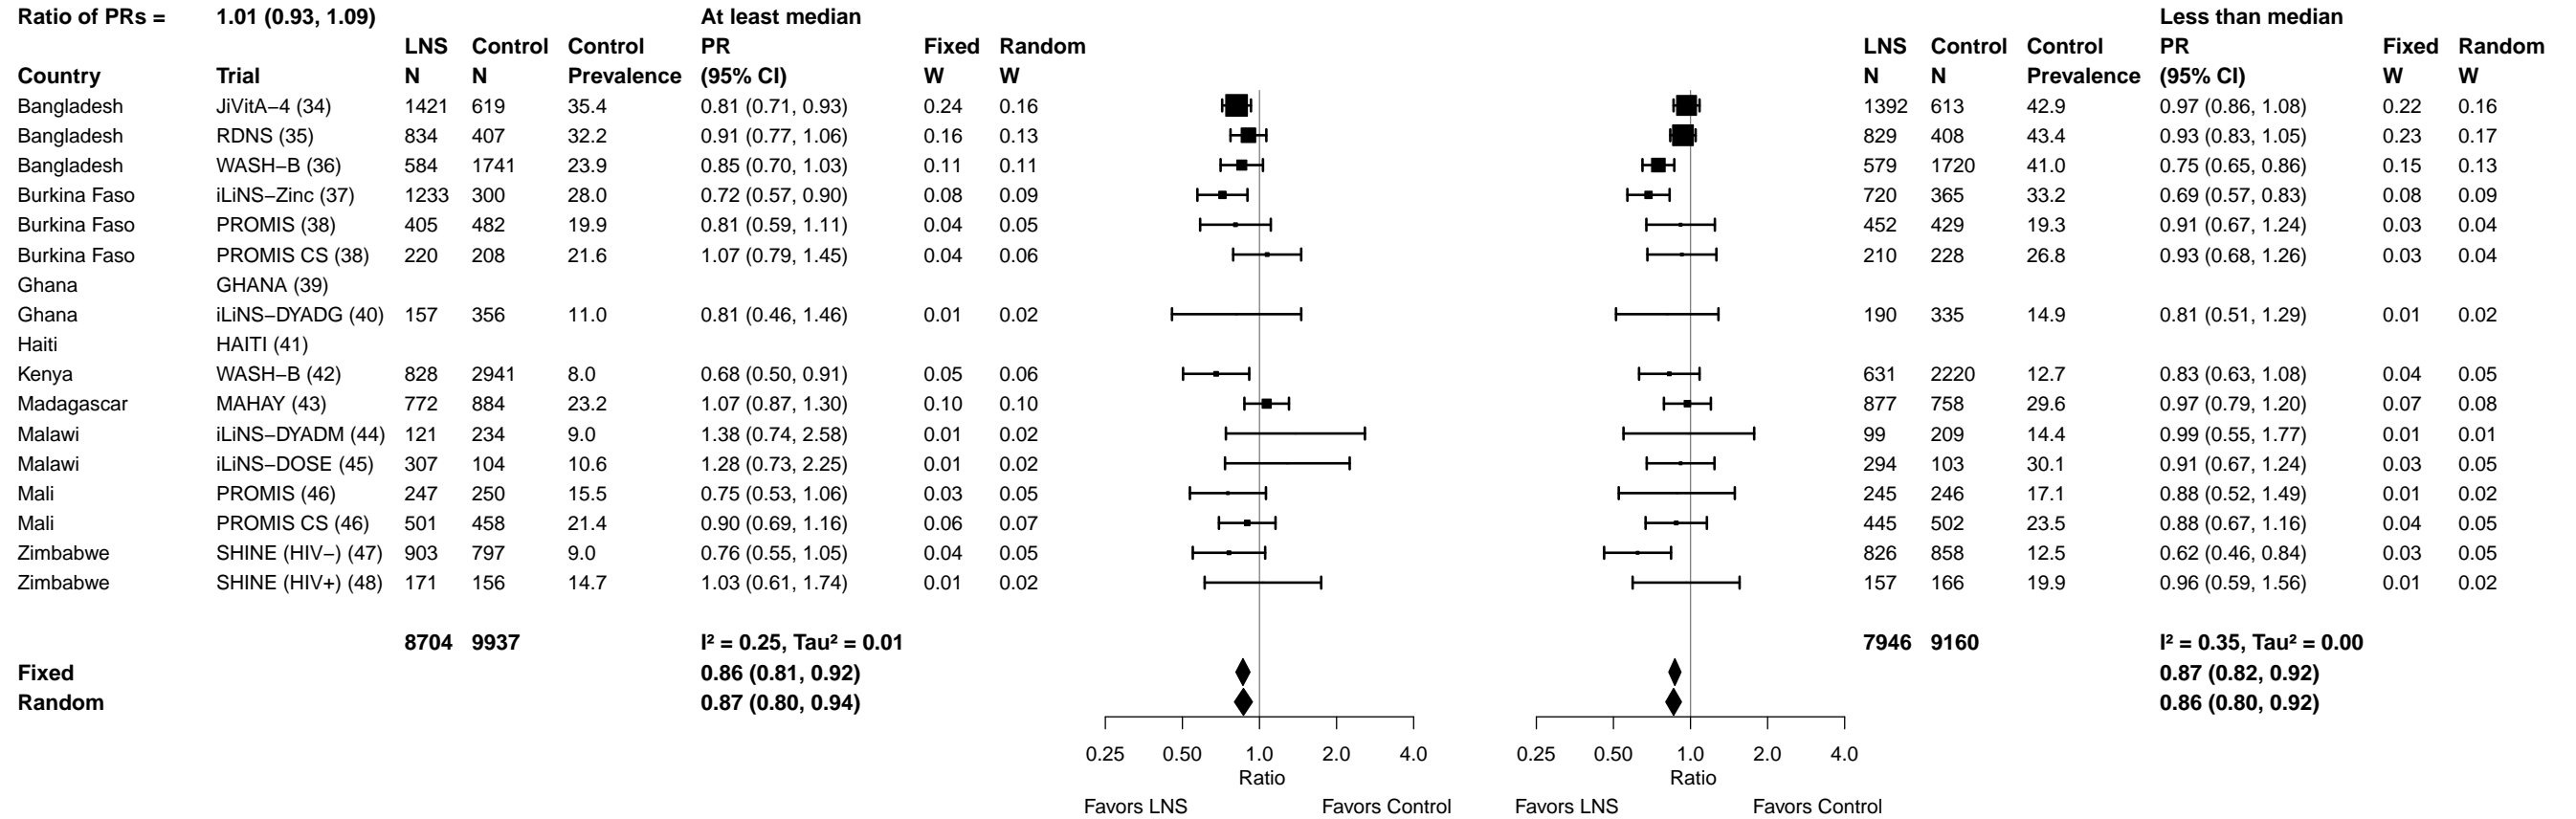

Supplemental figure 7M: Underweight prevalence ratio

7M2: Stratified by Household food insecurity

P-for-interaction = 0.661

Ratio of PRs = 0.98 (0.89, 1.08)

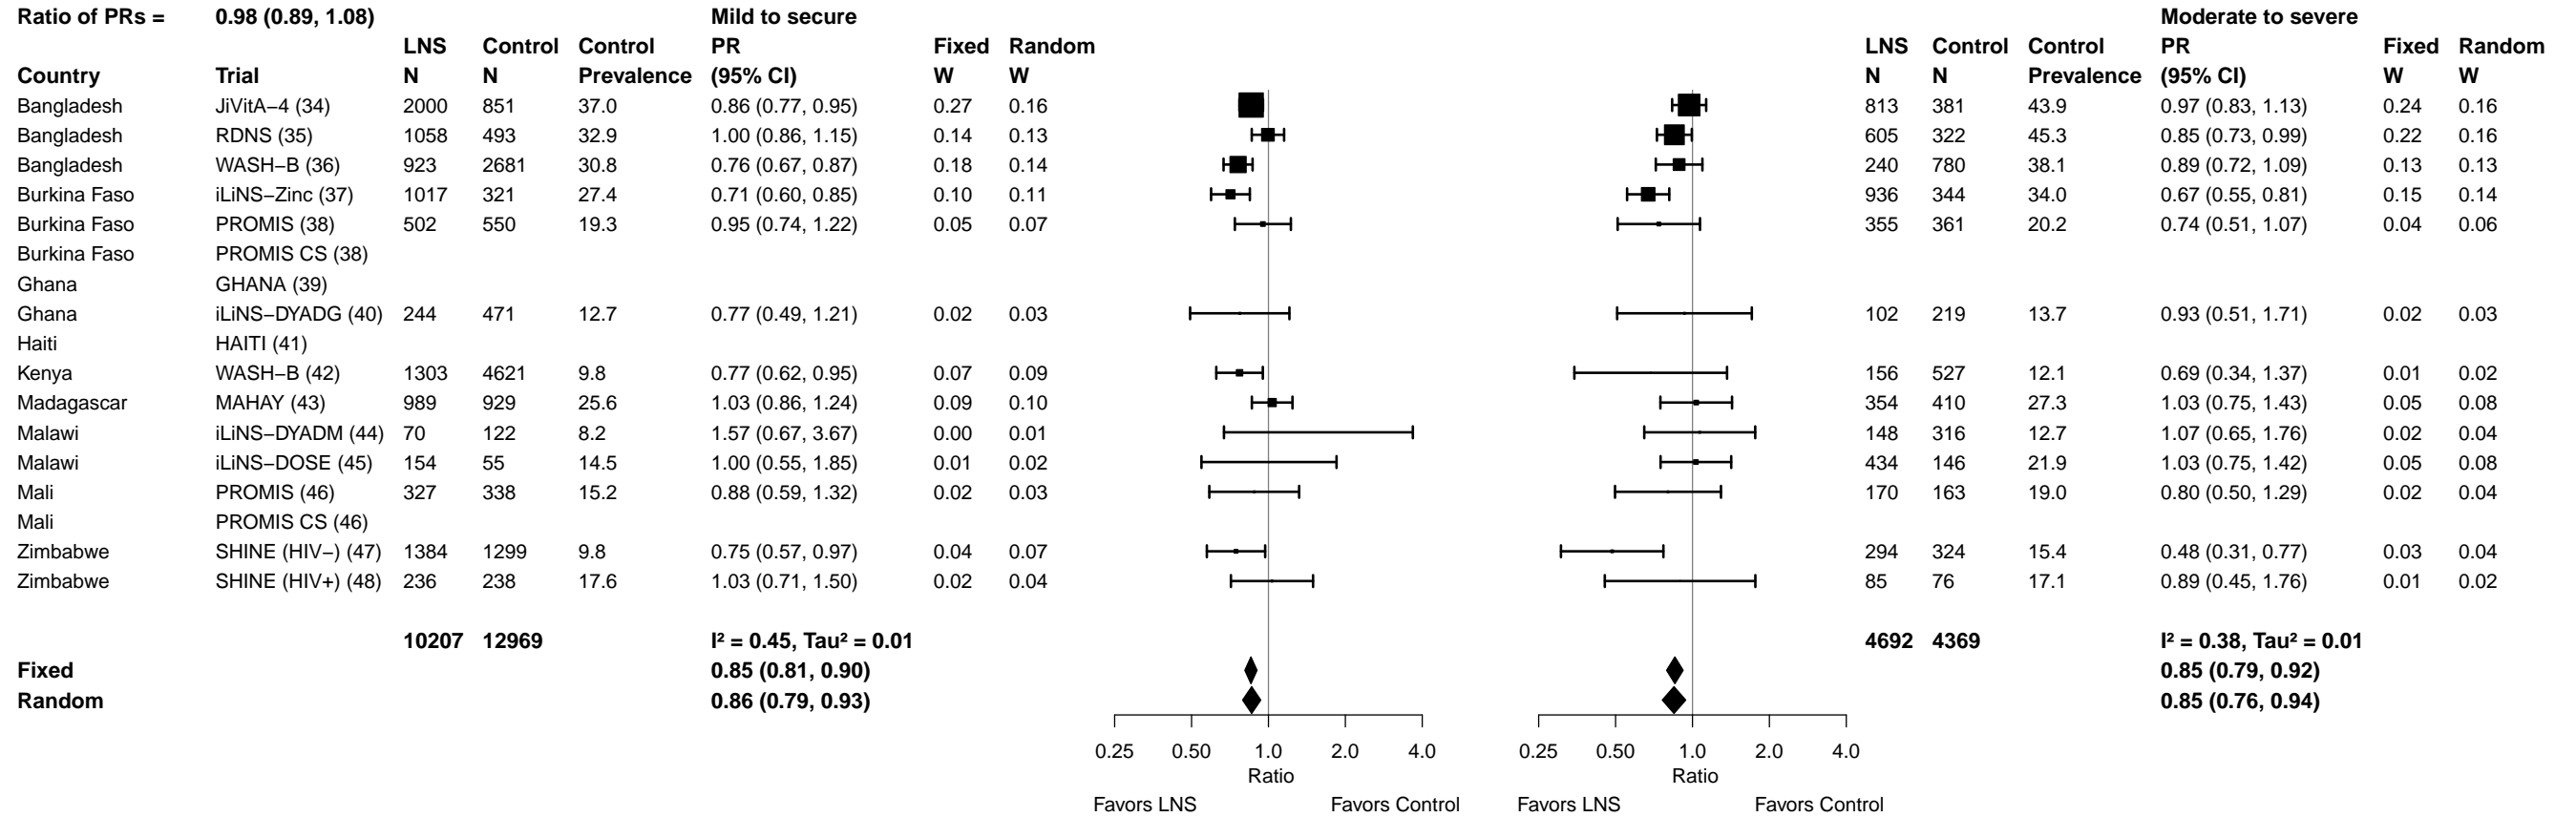



Supplemental figure 7M: Underweight prevalence ratio

7M3: Stratified by Household source water quality

P-for-interaction = 0.762

Ratio of PRs = 0.98 (0.86, 1.12)

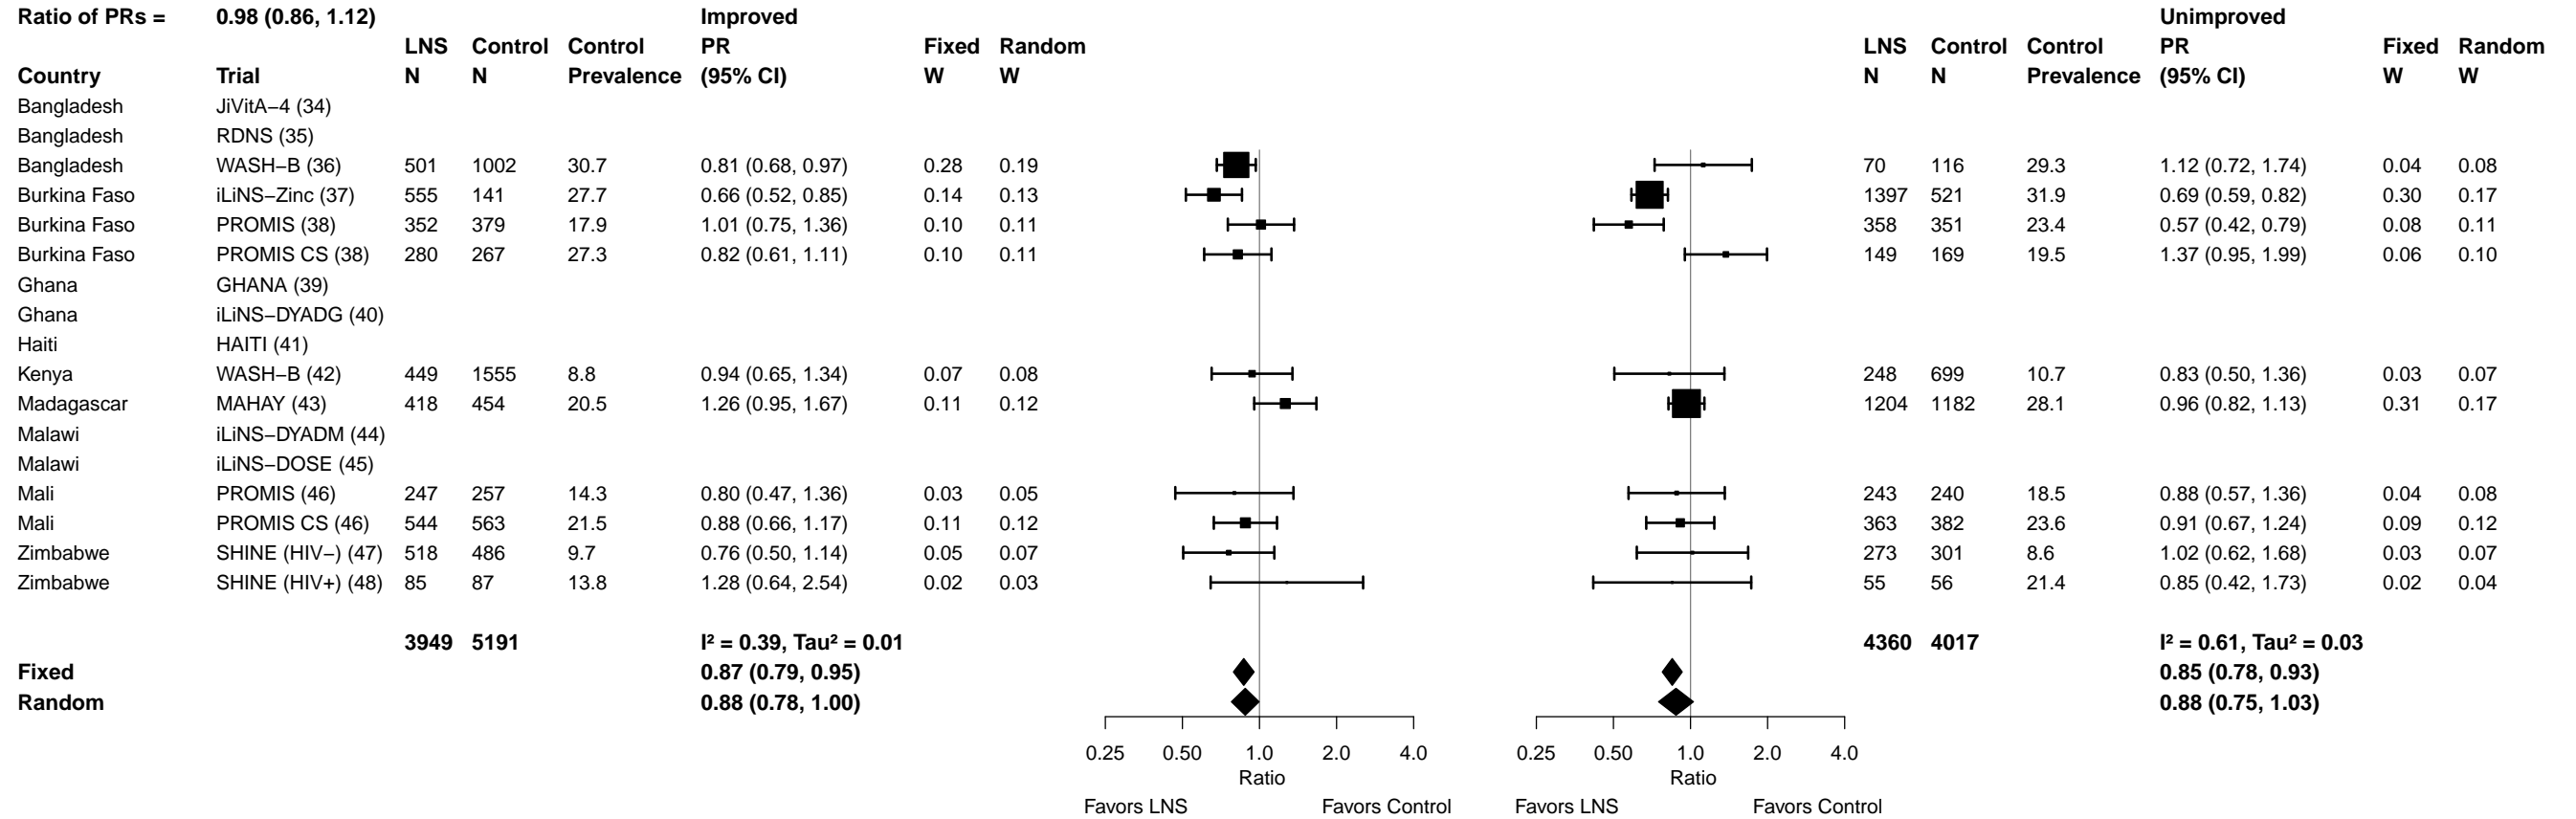

Supplemental figure 7M: Underweight prevalence ratio

7M4: Stratified by Household sanitation

P-for-interaction = 0.840

Ratio of PRs = 1.01 (0.89, 1.15)

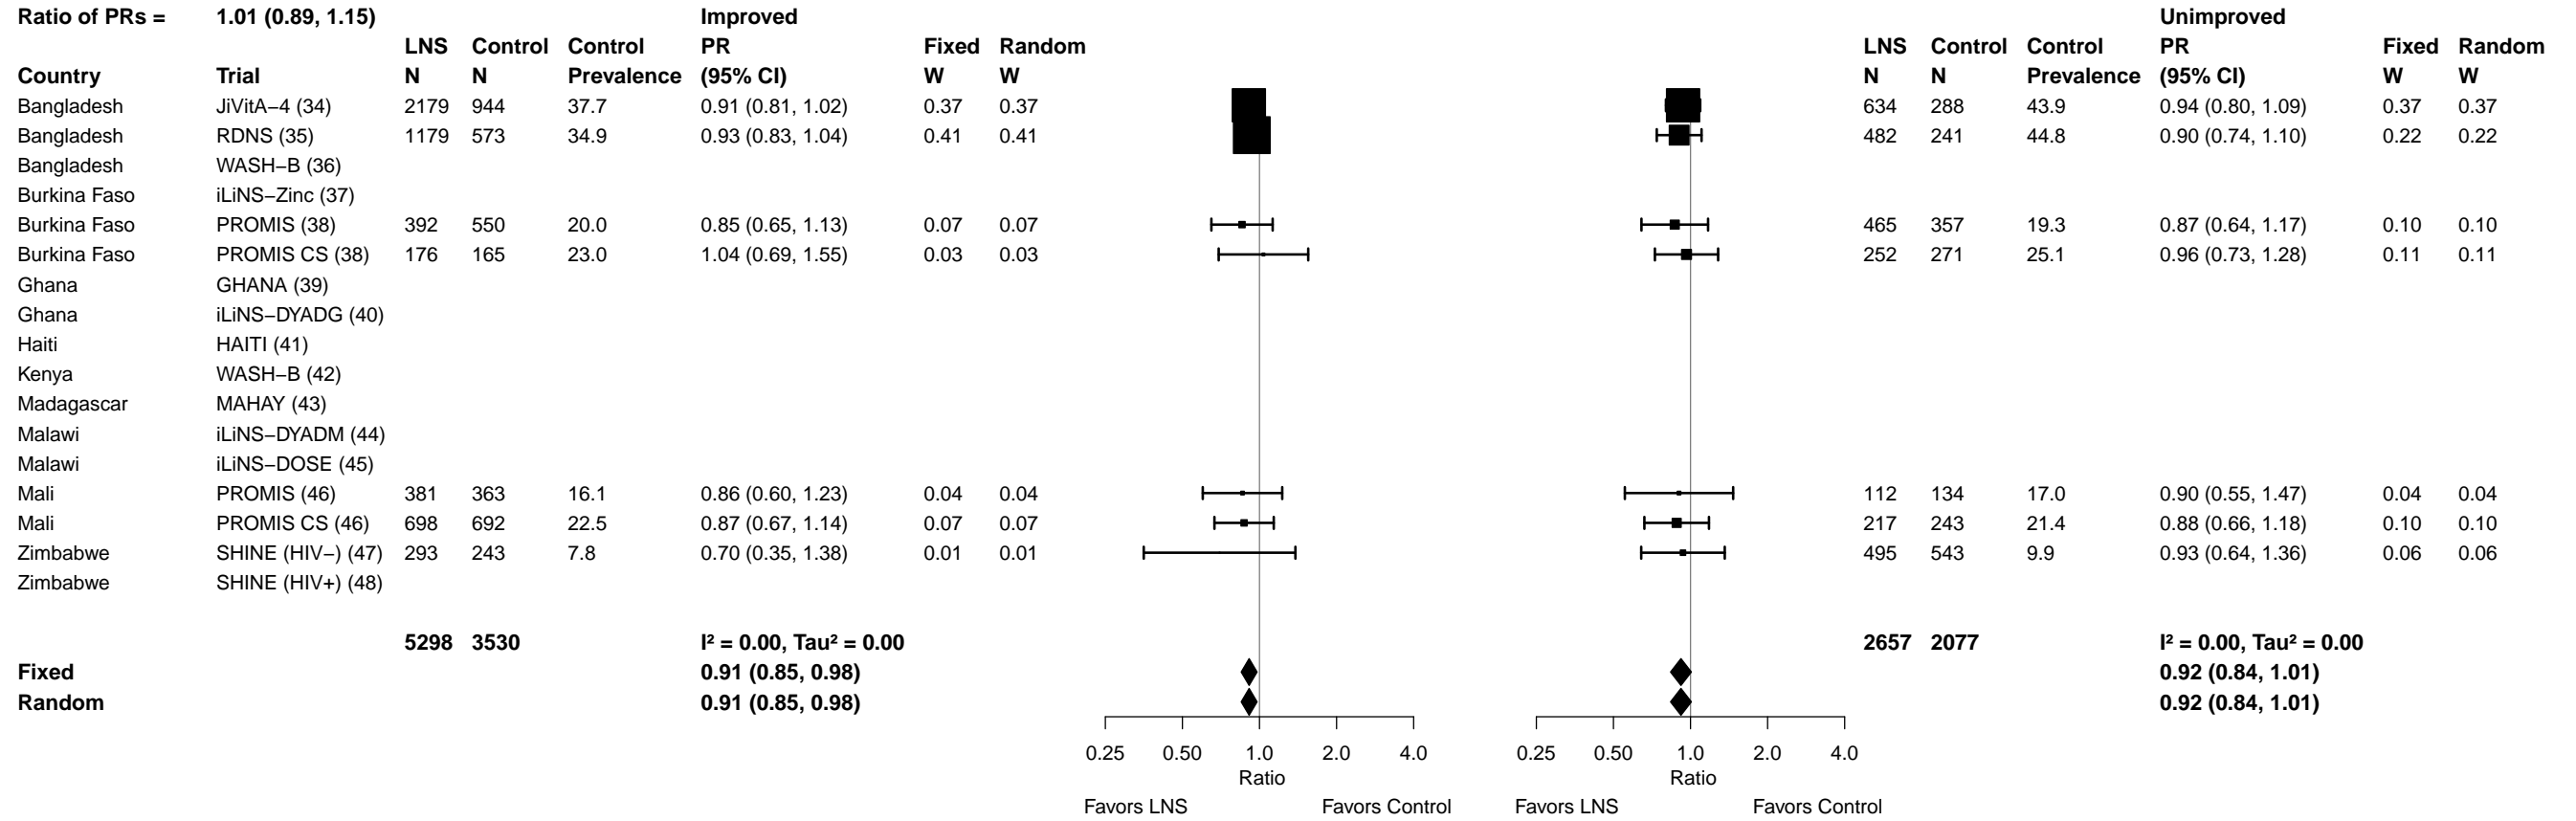

Supplemental figure 7M: Underweight prevalence ratio

7M5: Stratified by Home environment

P-for-interaction = 0.416

Ratio of PRs = 1.05 (0.94, 1.17)

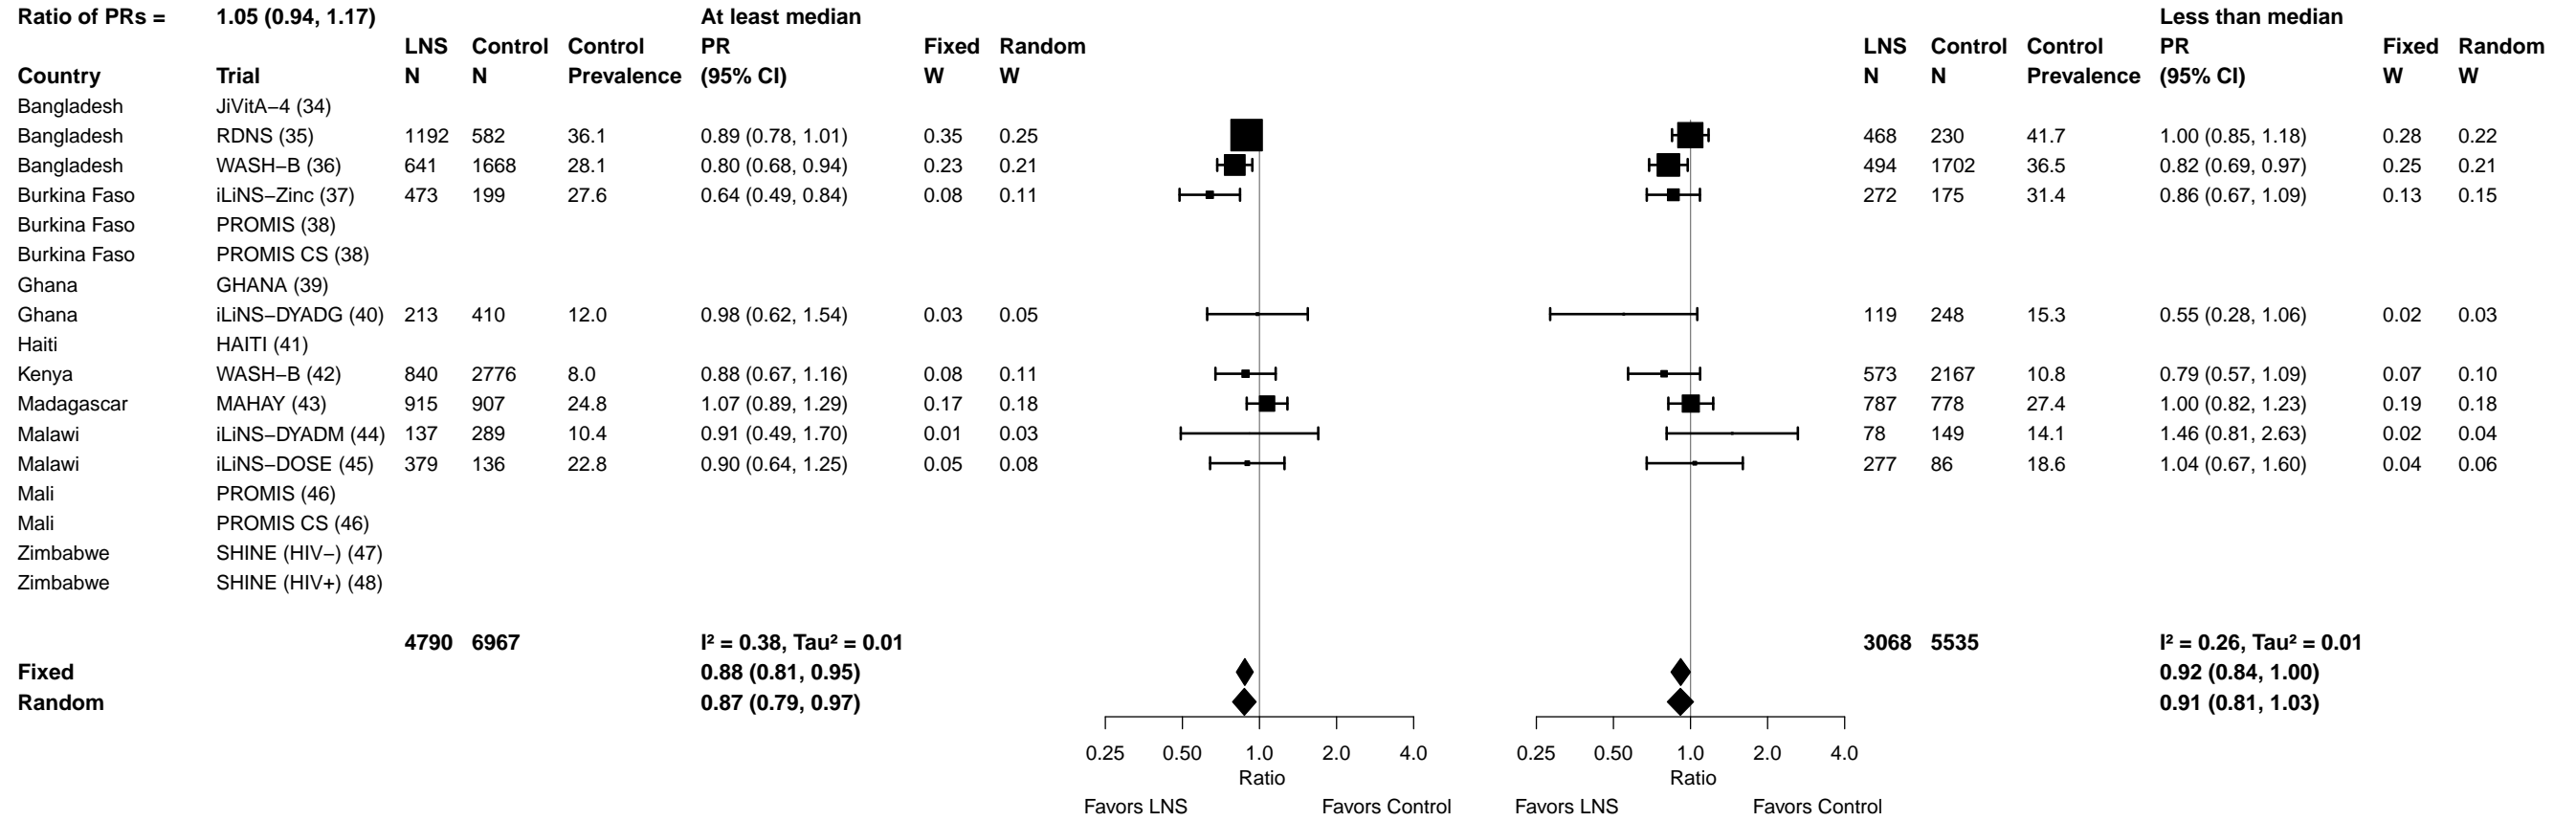

Supplemental figure 7M: Underweight prevalence ratio

7M6: Stratified by Season at the time of assessment

P-for-interaction = 0.102  
 Ratio of PRs = 1.08 (0.98, 1.19)

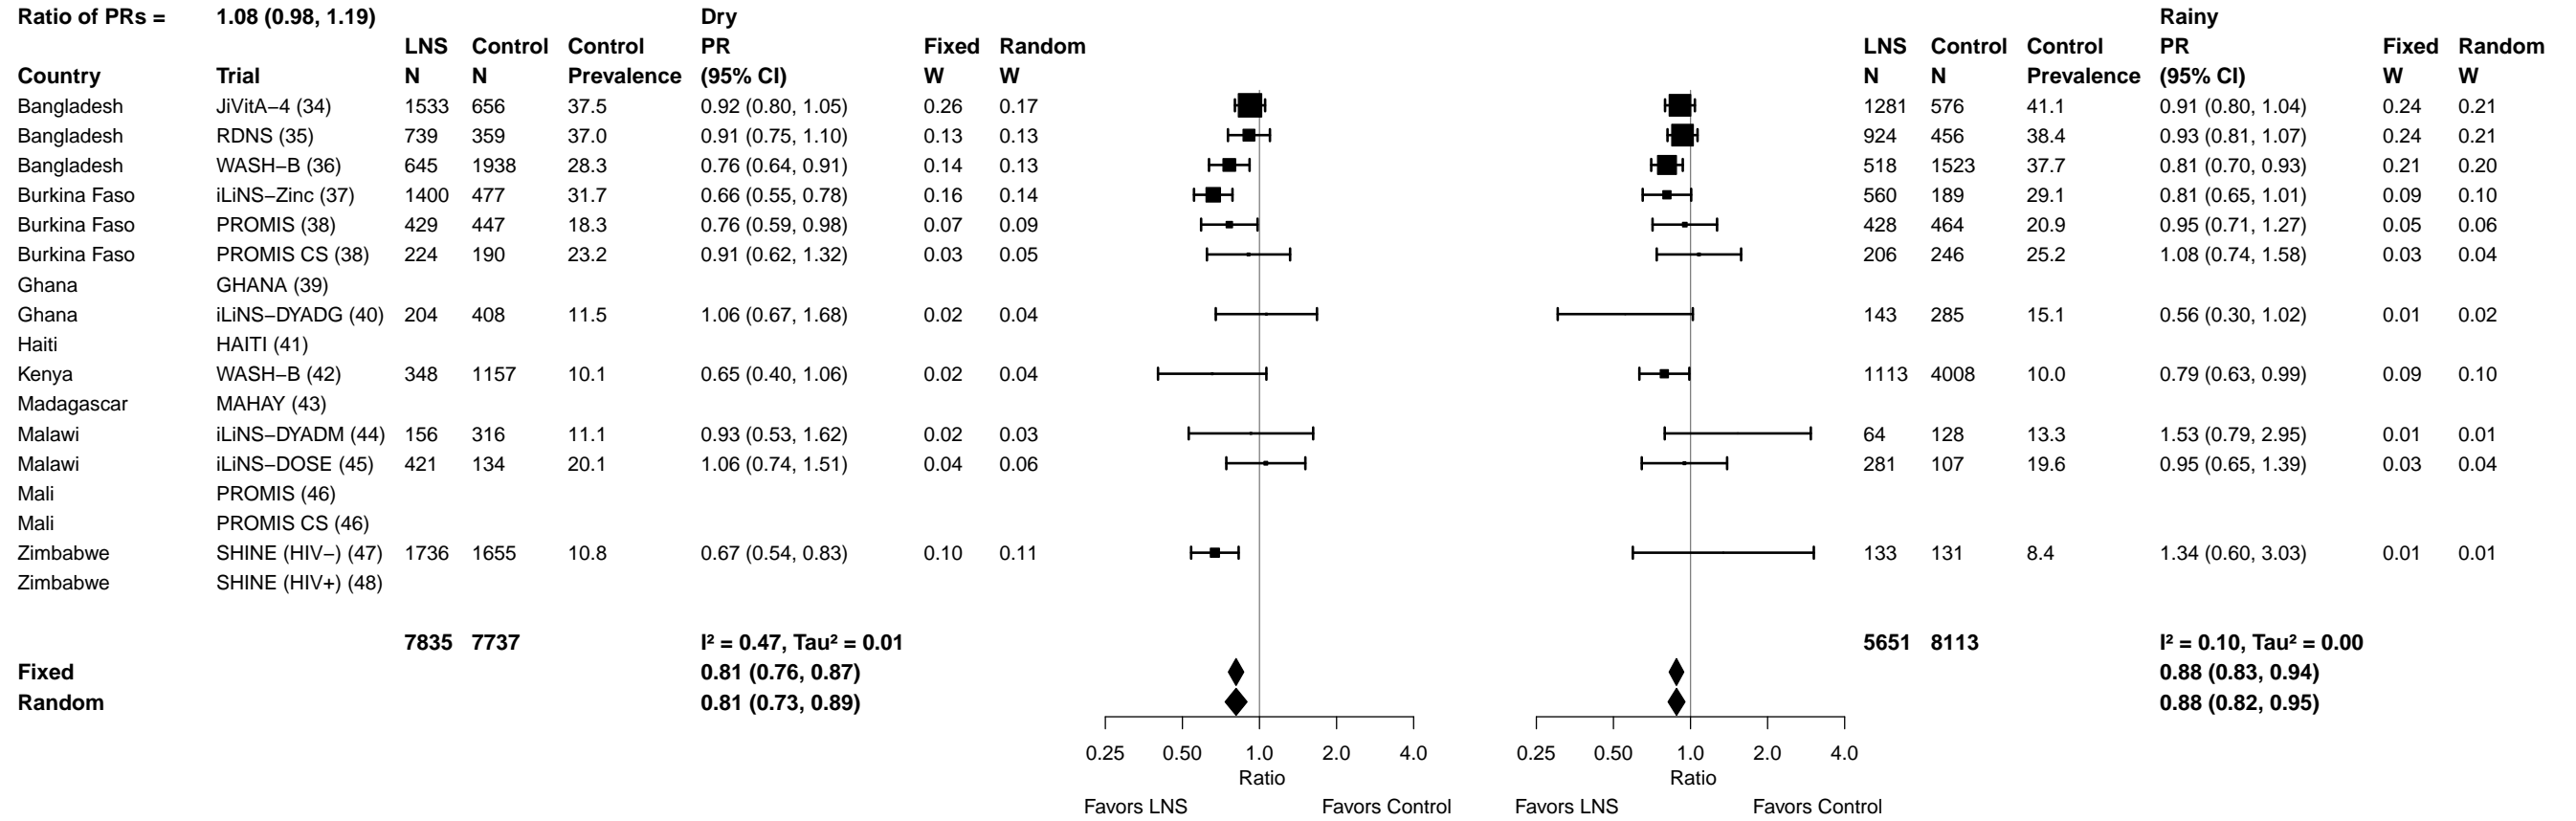

### Supplemental figure 7N: Underweight prevalence difference

#### 7N1: Stratified by Household socio-economic status

P-for-interaction = 0.123

Difference in PDs = -0.01 (-0.03, 0.00)

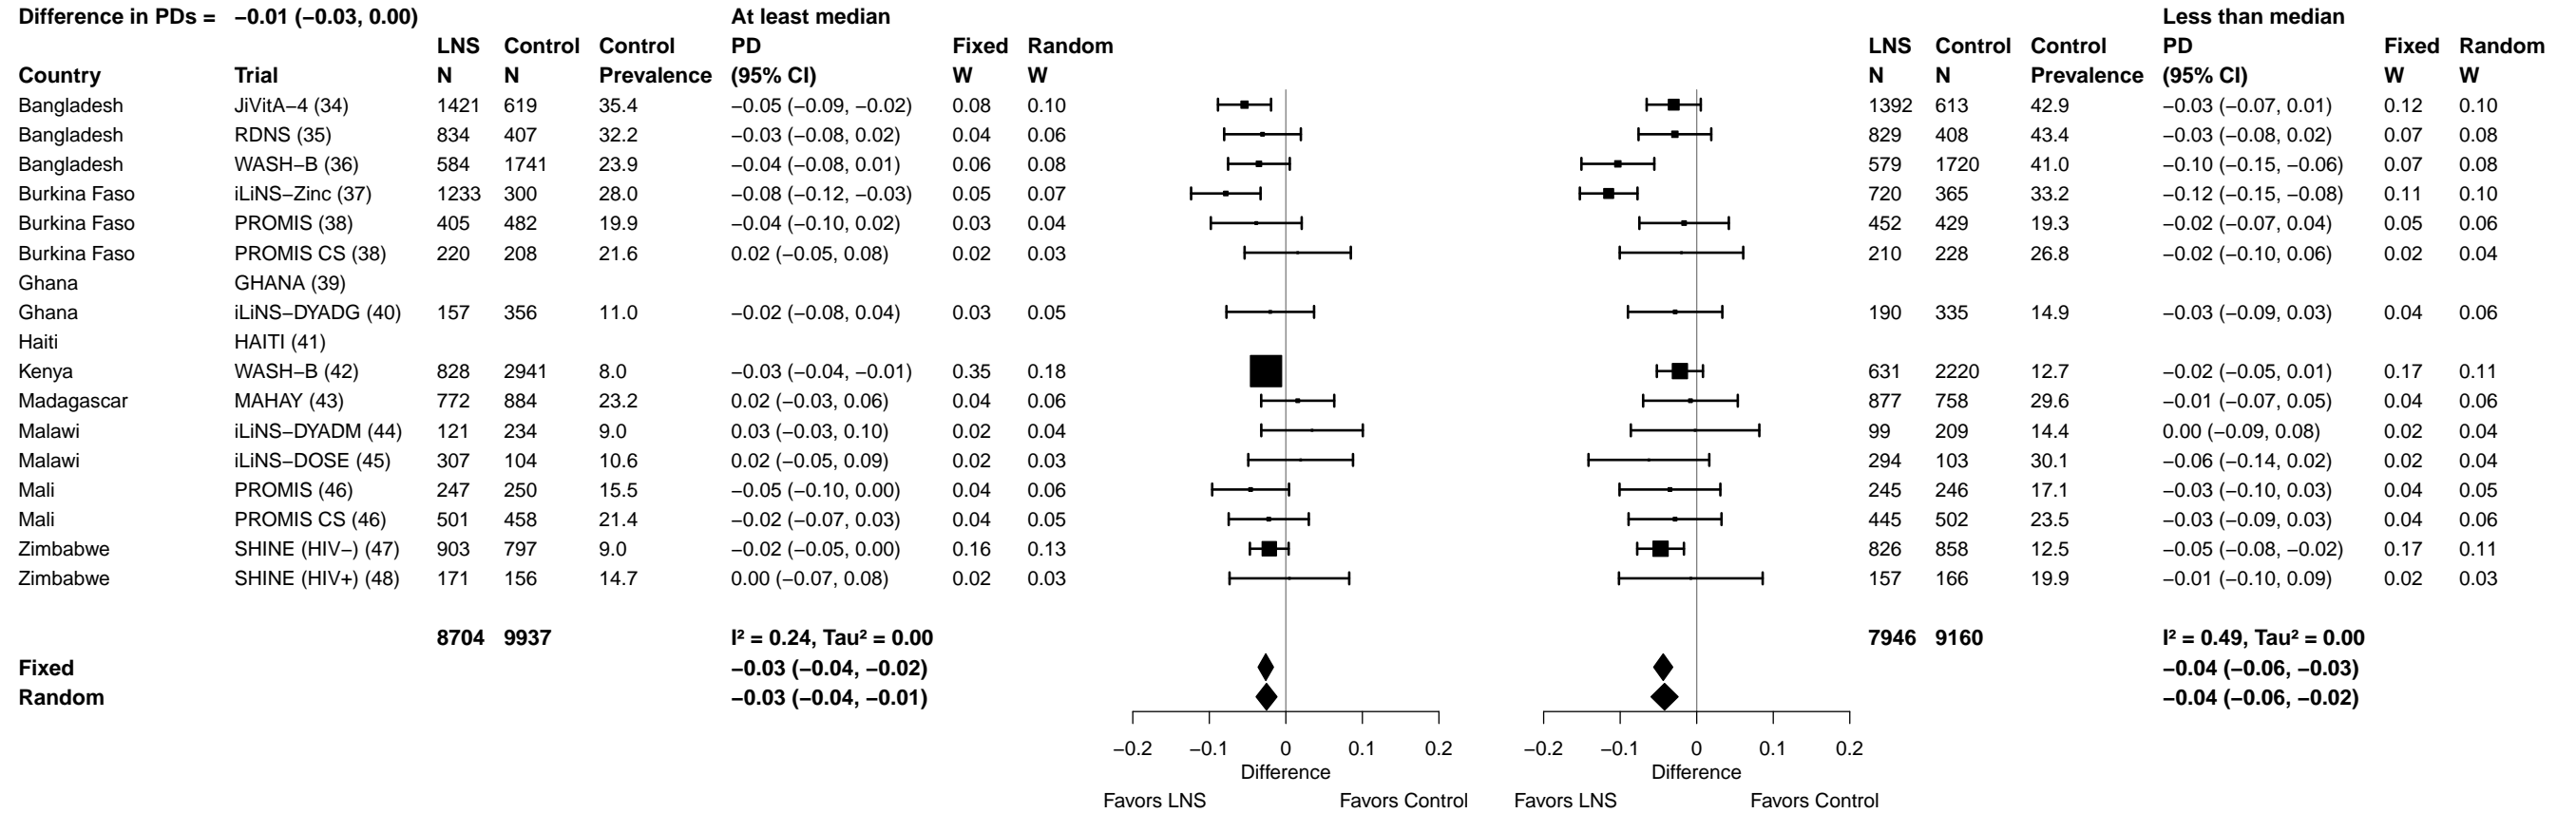

Supplemental figure 7N: Underweight prevalence difference

7N2: Stratified by Household food insecurity

P-for-interaction = 0.068

Difference in PDs = -0.02 (-0.04, 0.00)

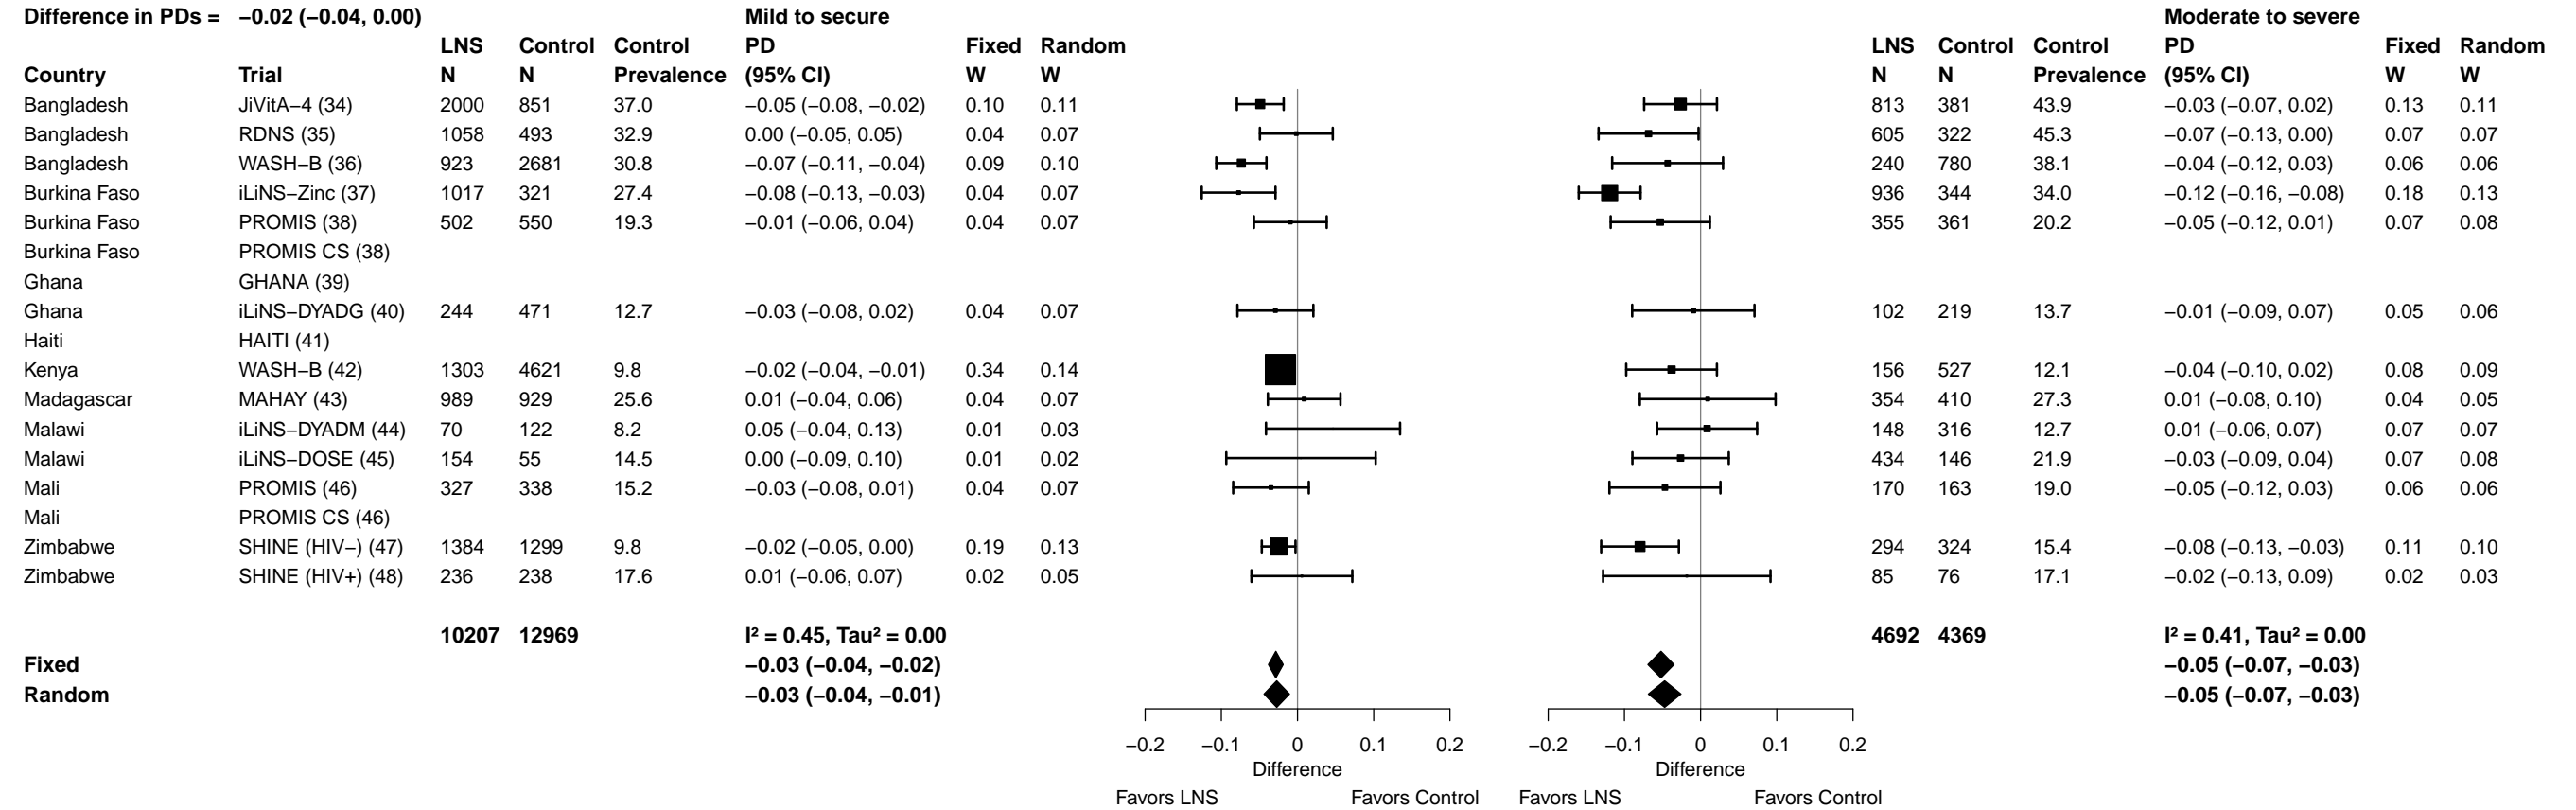

Supplemental figure 7N: Underweight prevalence difference

7N3: Stratified by Household source water quality

P-for-interaction = 0.232

Difference in PDs = -0.01 (-0.04, 0.01)

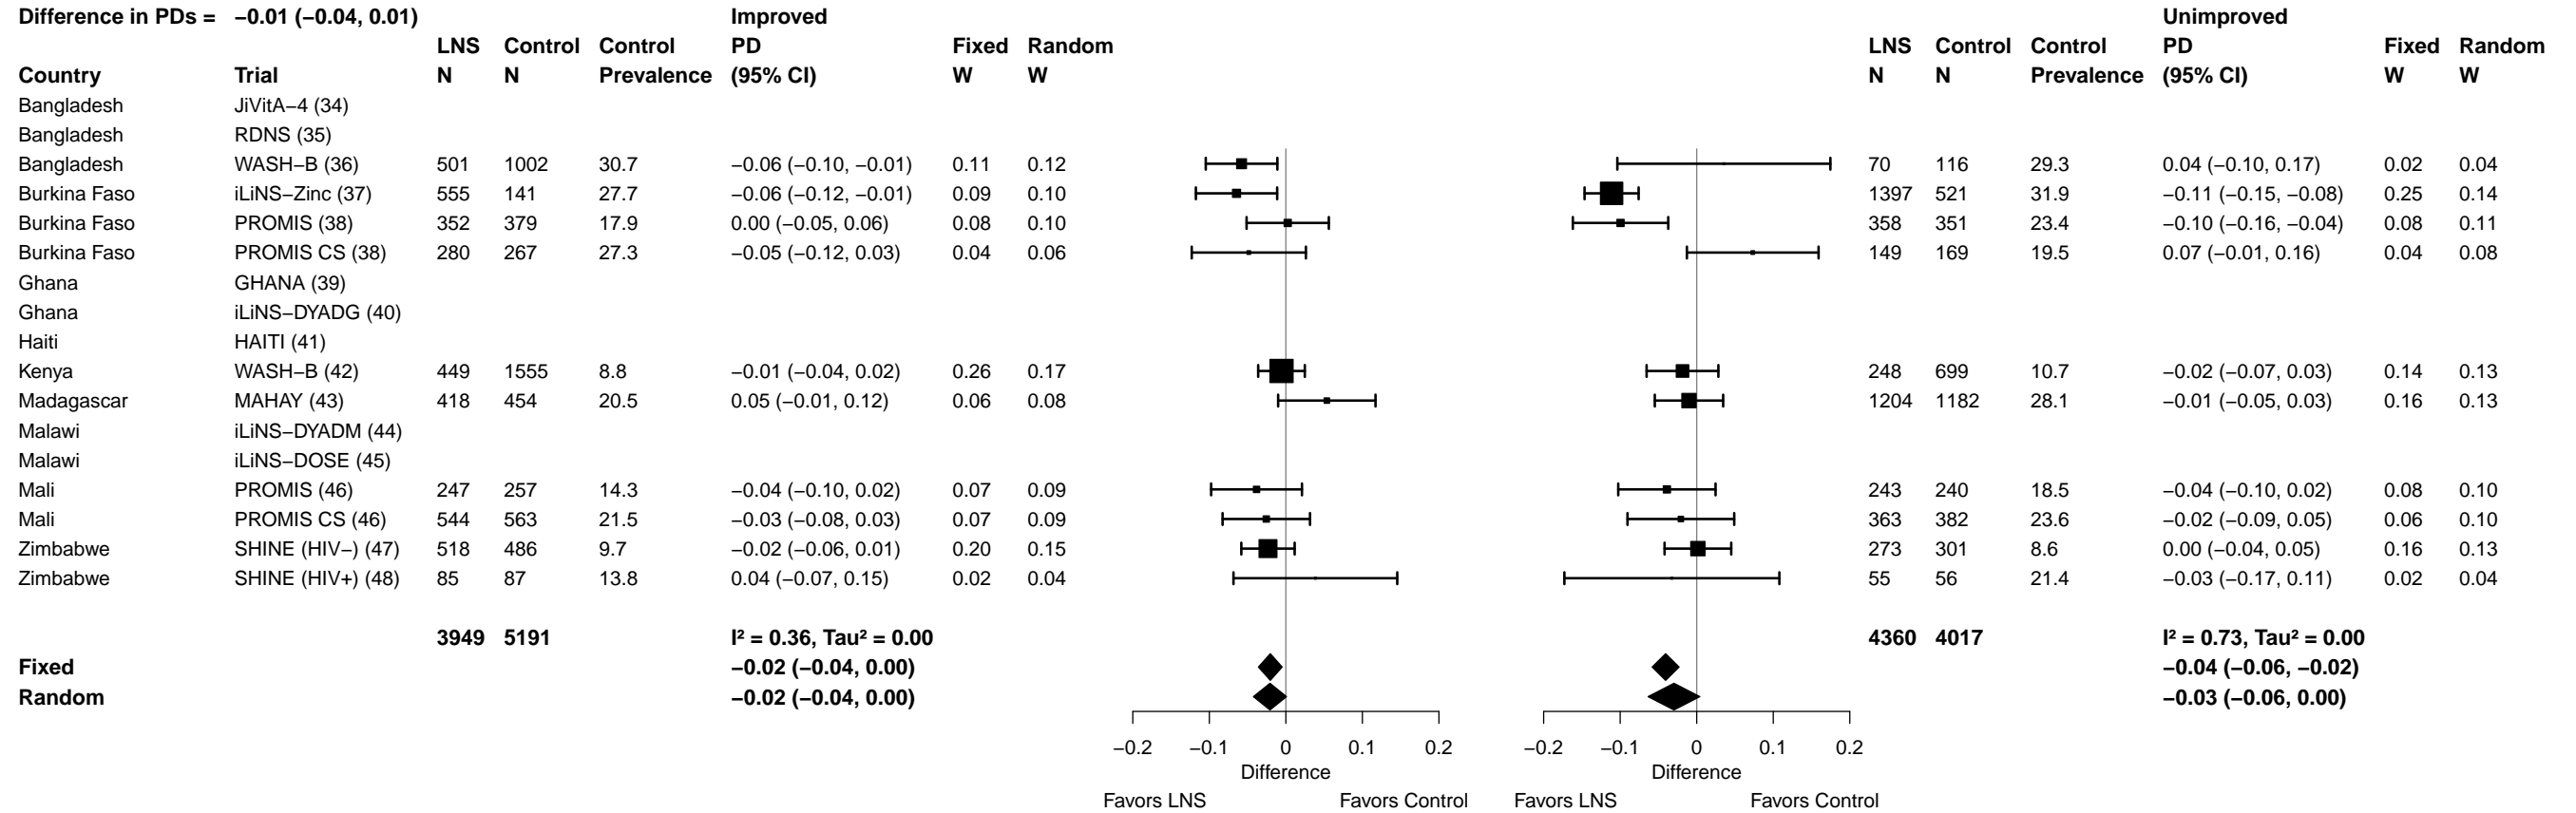

Supplemental figure 7N: Underweight prevalence difference

7N4: Stratified by Household sanitation

P-for-interaction = 0.679

Difference in PDs = 0.01 (-0.02, 0.03)

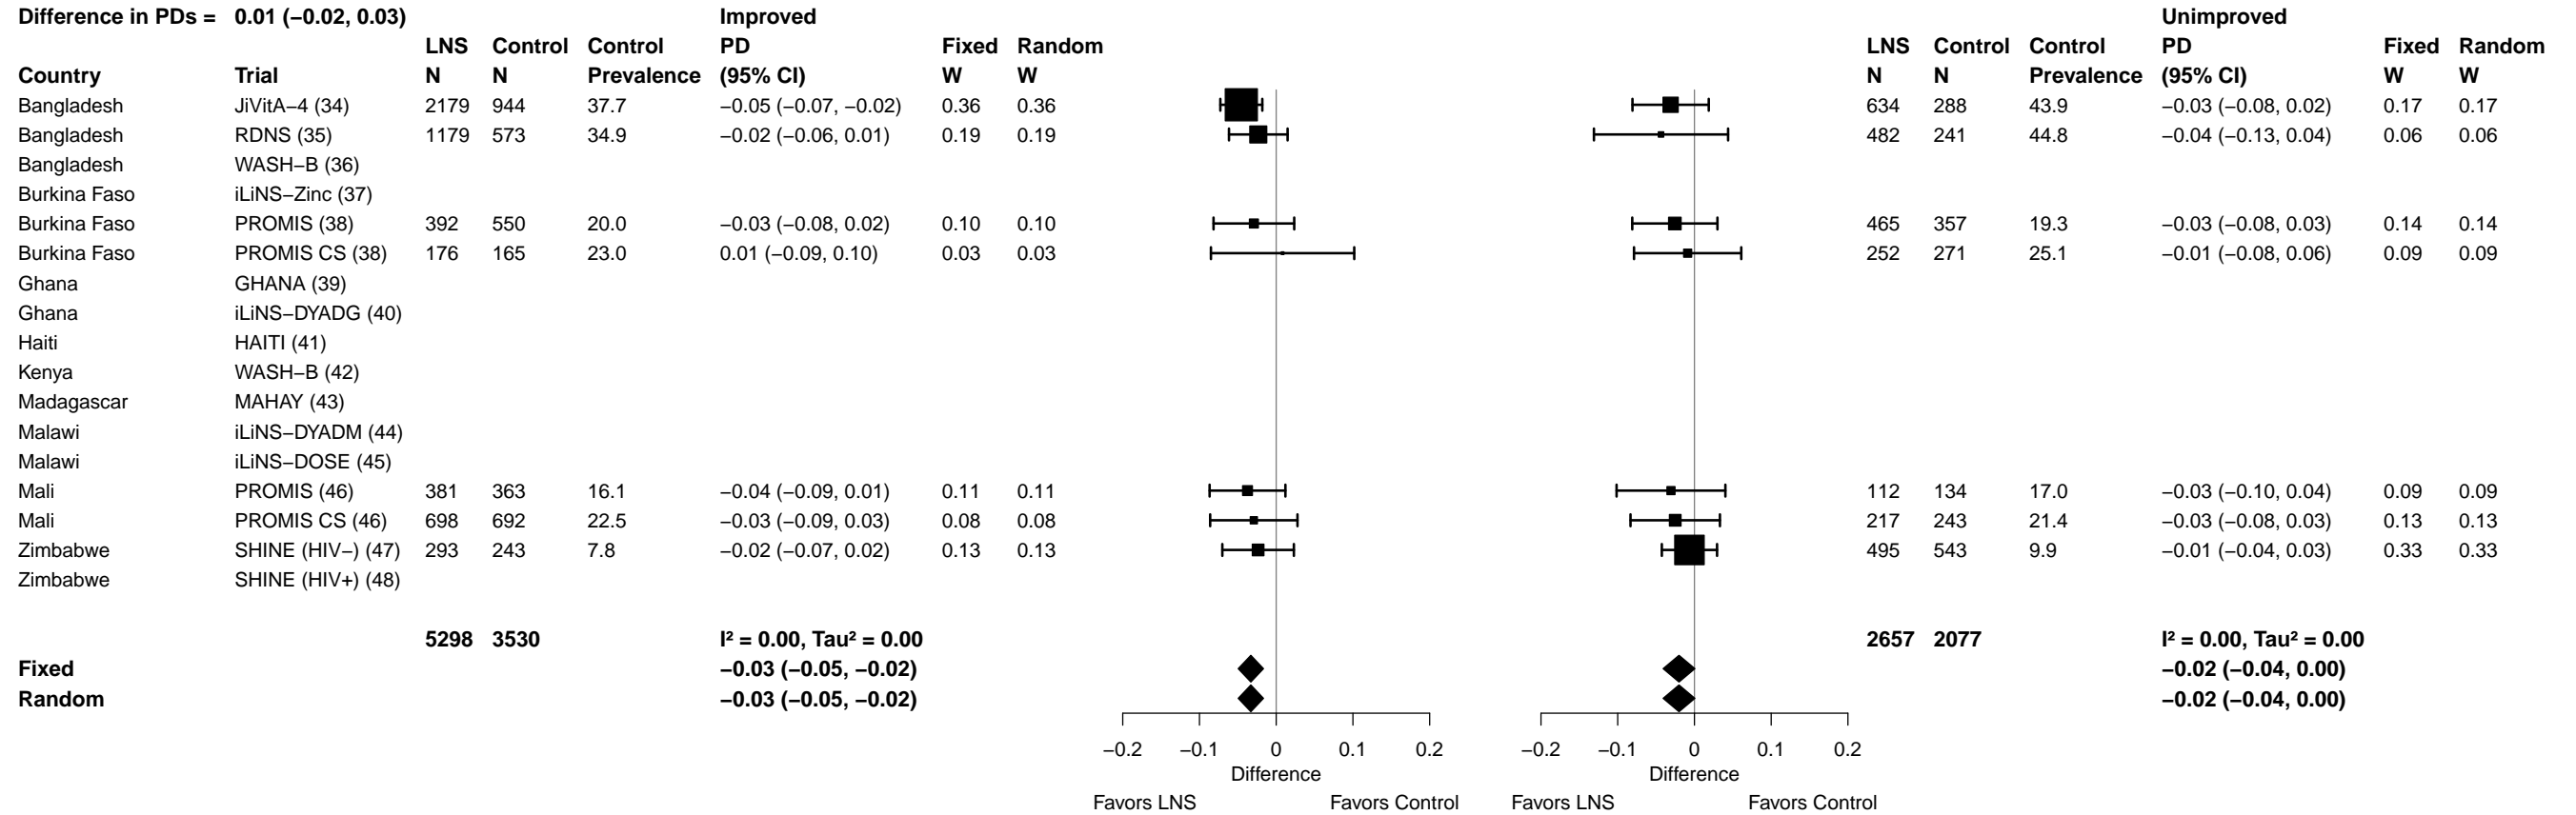



Supplemental figure 7N: Underweight prevalence difference

7N5: Stratified by Home environment

P-for-interaction = 0.750

Difference in PDs = 0.00 (-0.03, 0.02)

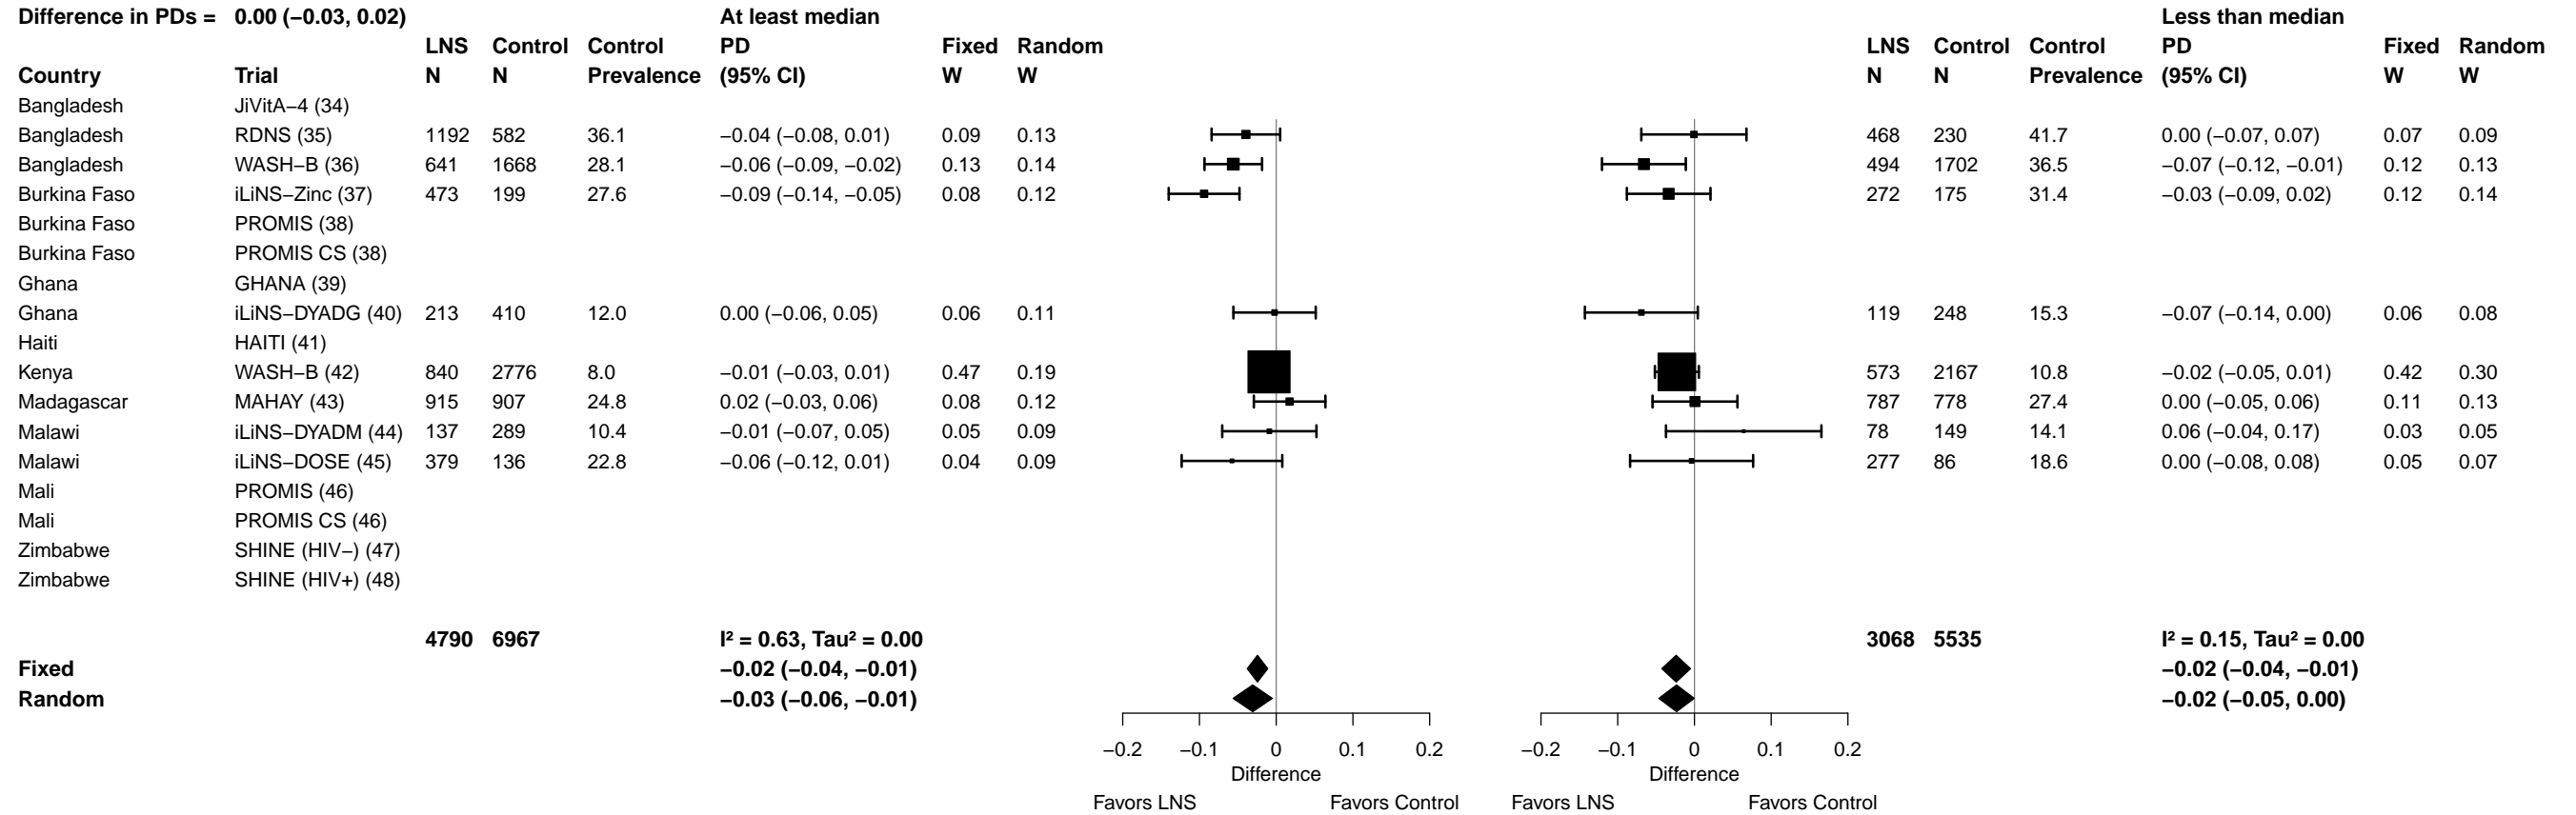

Supplemental figure 7N: Underweight prevalence difference

7N6: Stratified by Season at the time of assessment

P-for-interaction = 0.254

Difference in PDs = 0.01 (-0.01, 0.03)

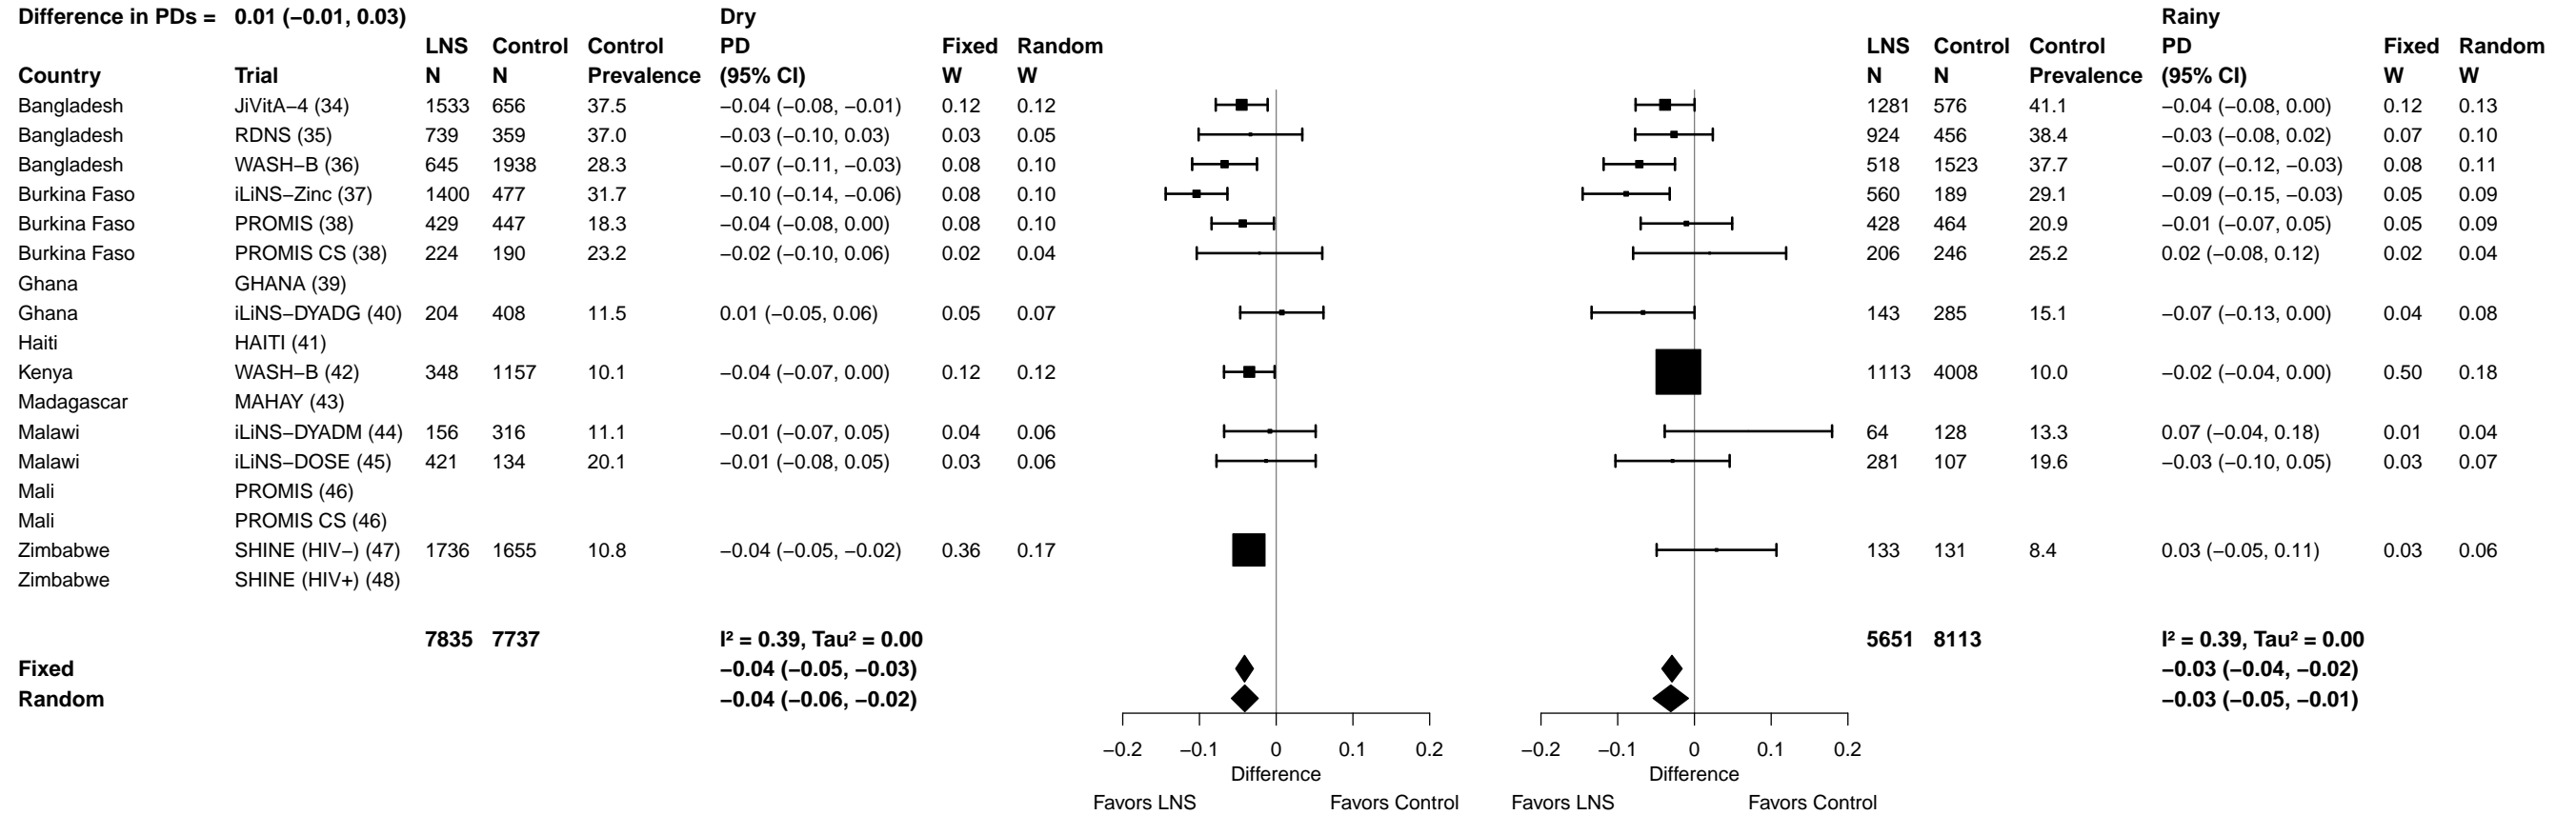



Supplemental figure 7O: Mean difference in HCZ

7O2: Stratified by Household food insecurity

P-for-interaction = 0.603

Difference in MDs = -0.01 (-0.06, 0.03)

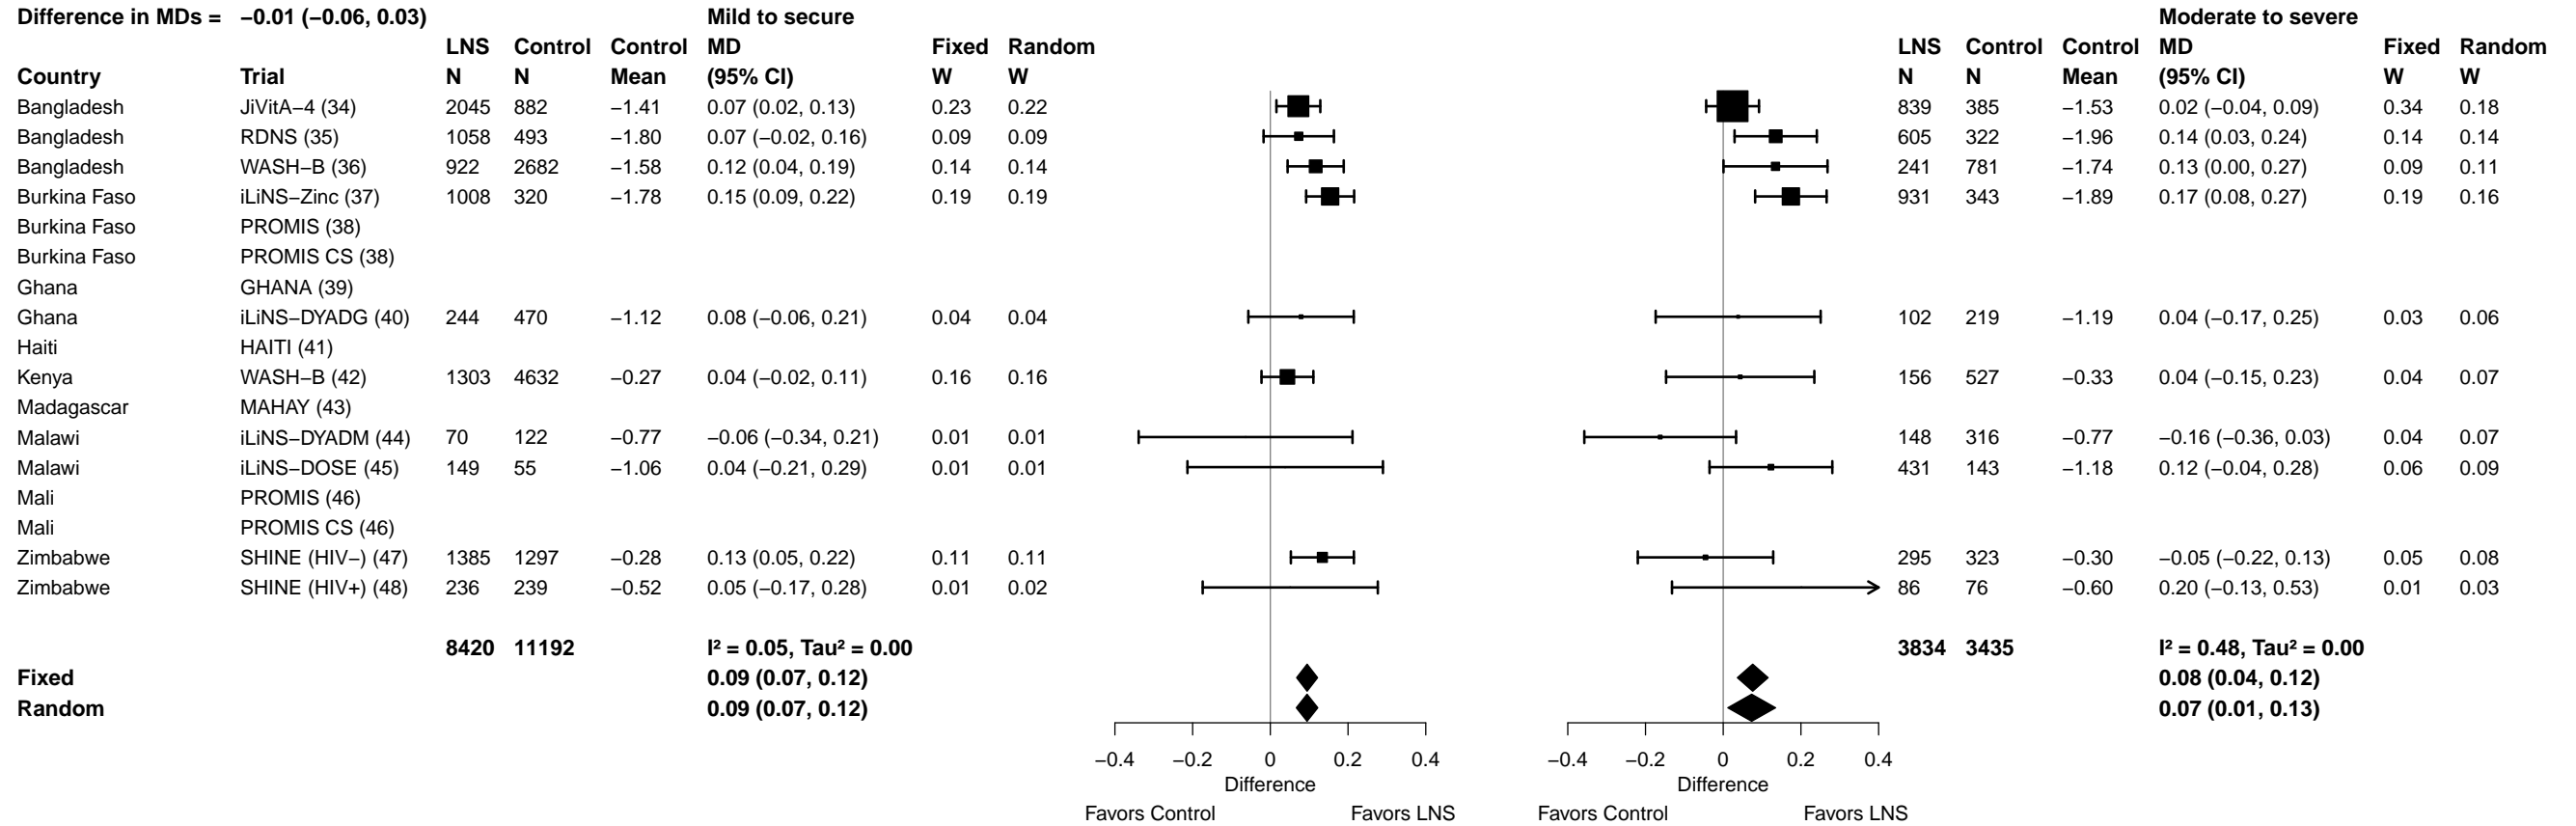

Supplemental figure 7O: Mean difference in HCZ

7O3: Stratified by Household source water quality

P-for-interaction = 0.341

Difference in MDs = 0.04 (-0.04, 0.12)

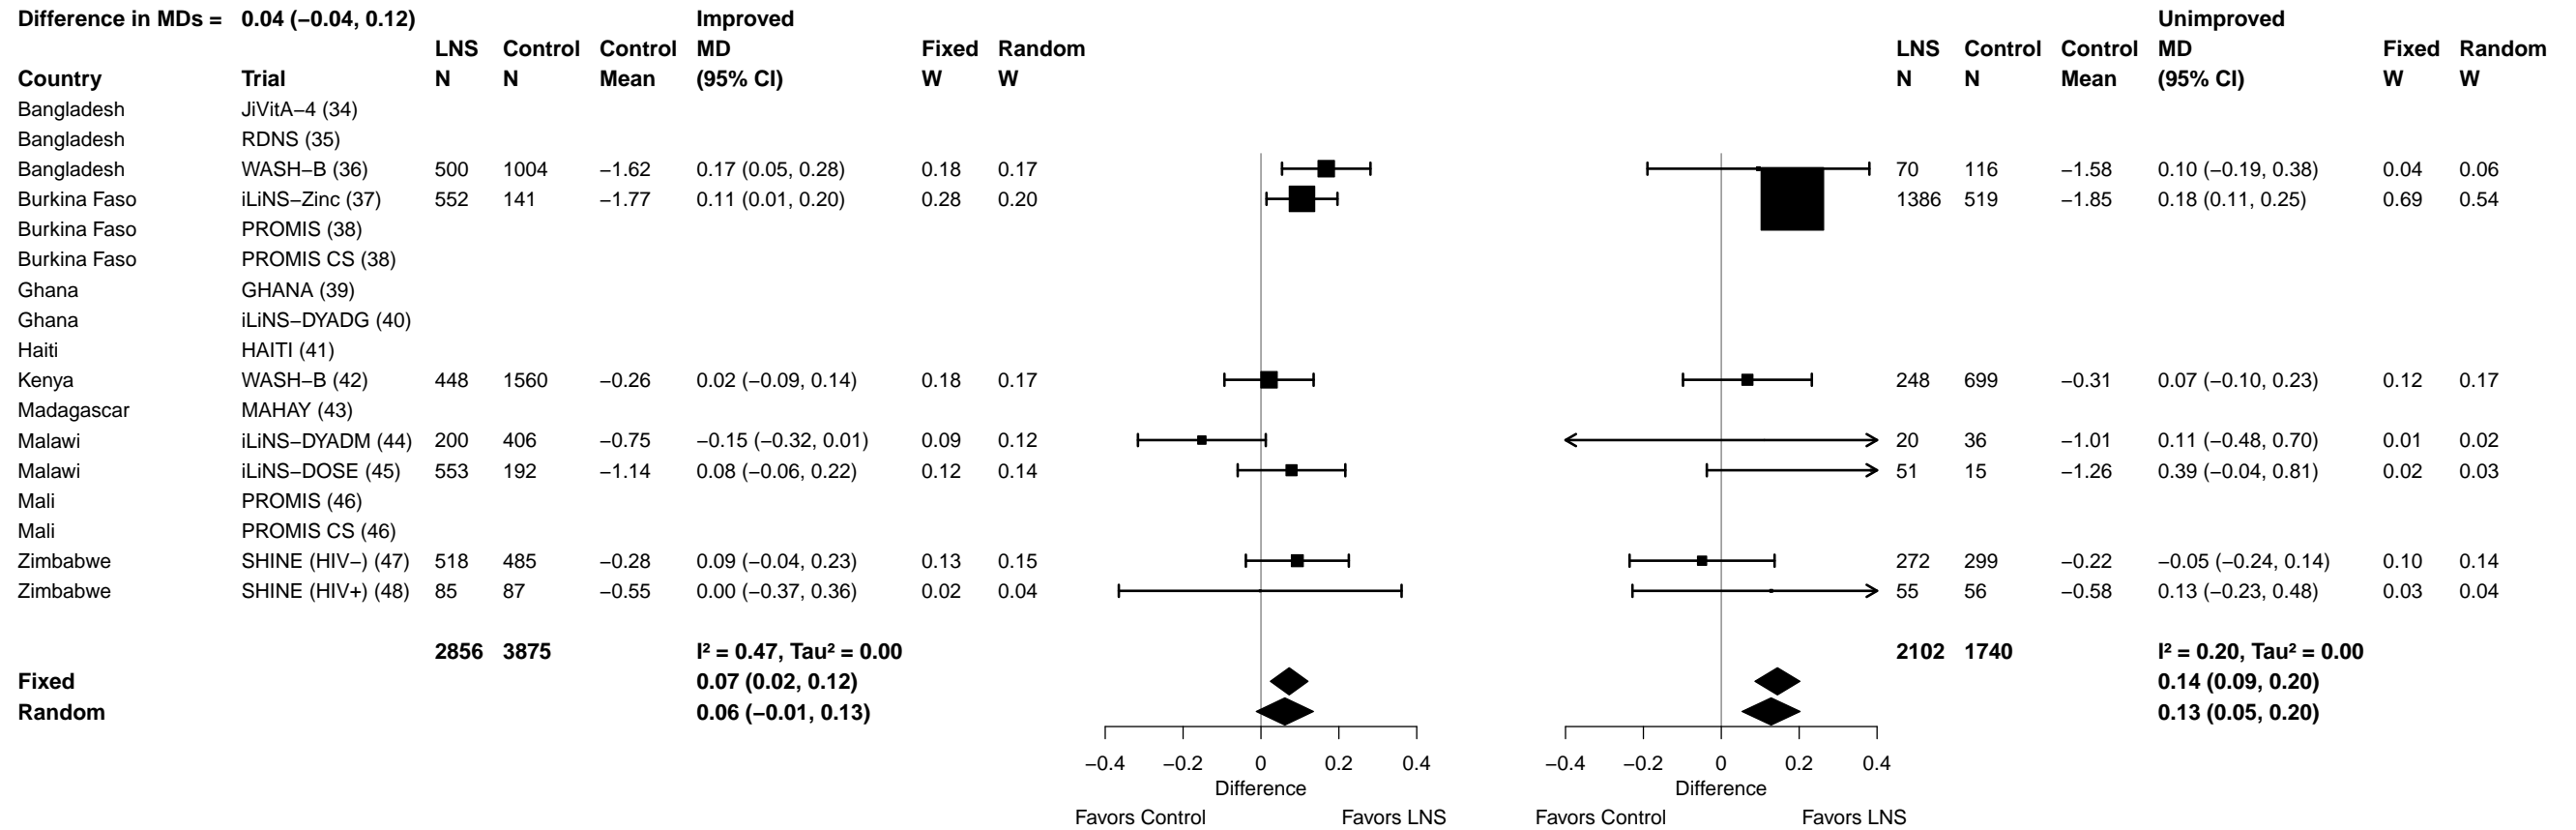

Supplemental figure 7O: Mean difference in HCZ

7O4: Stratified by Household sanitation

P-for-interaction = 0.339

Difference in MDs = -0.03 (-0.09, 0.03)

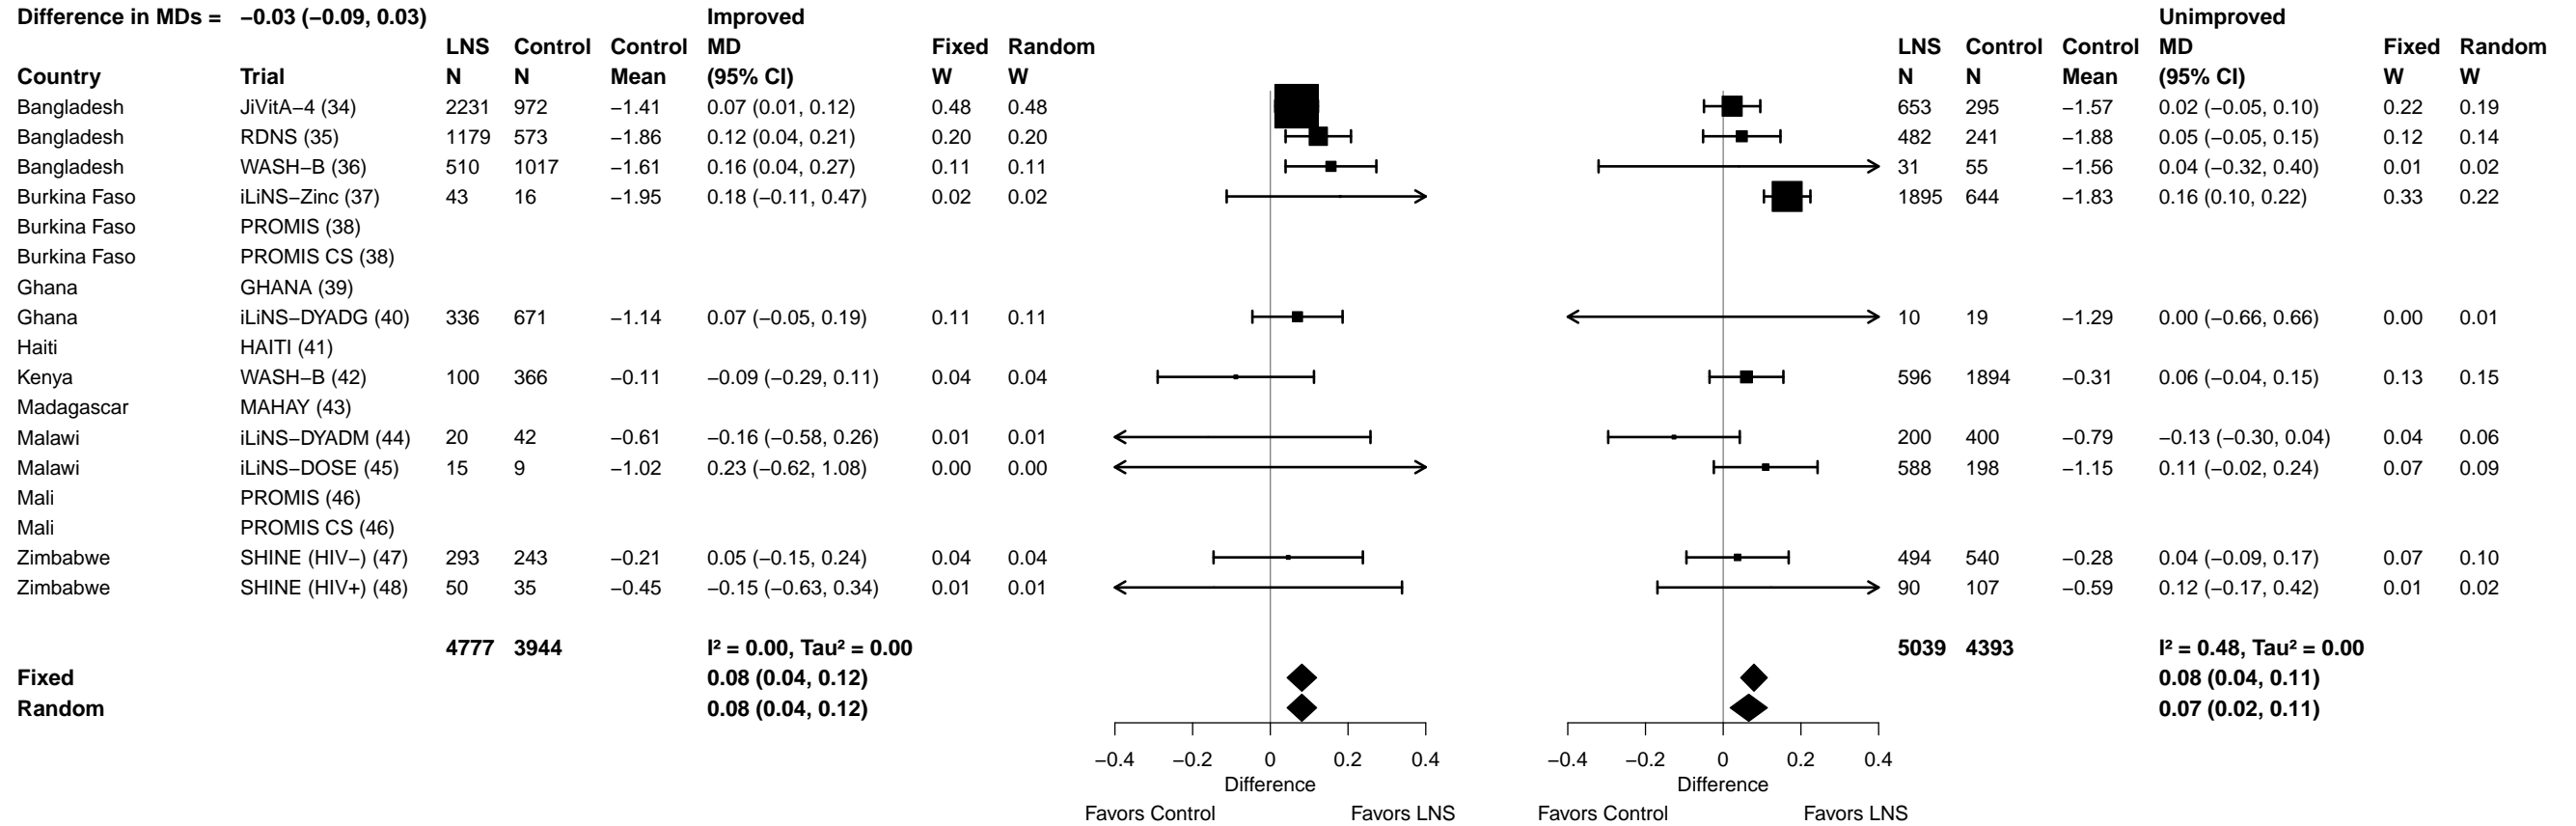

Supplemental figure 7O: Mean difference in HCZ

7O5: Stratified by Home environment

P-for-interaction = 0.416

Difference in MDs = 0.03 (-0.04, 0.09)

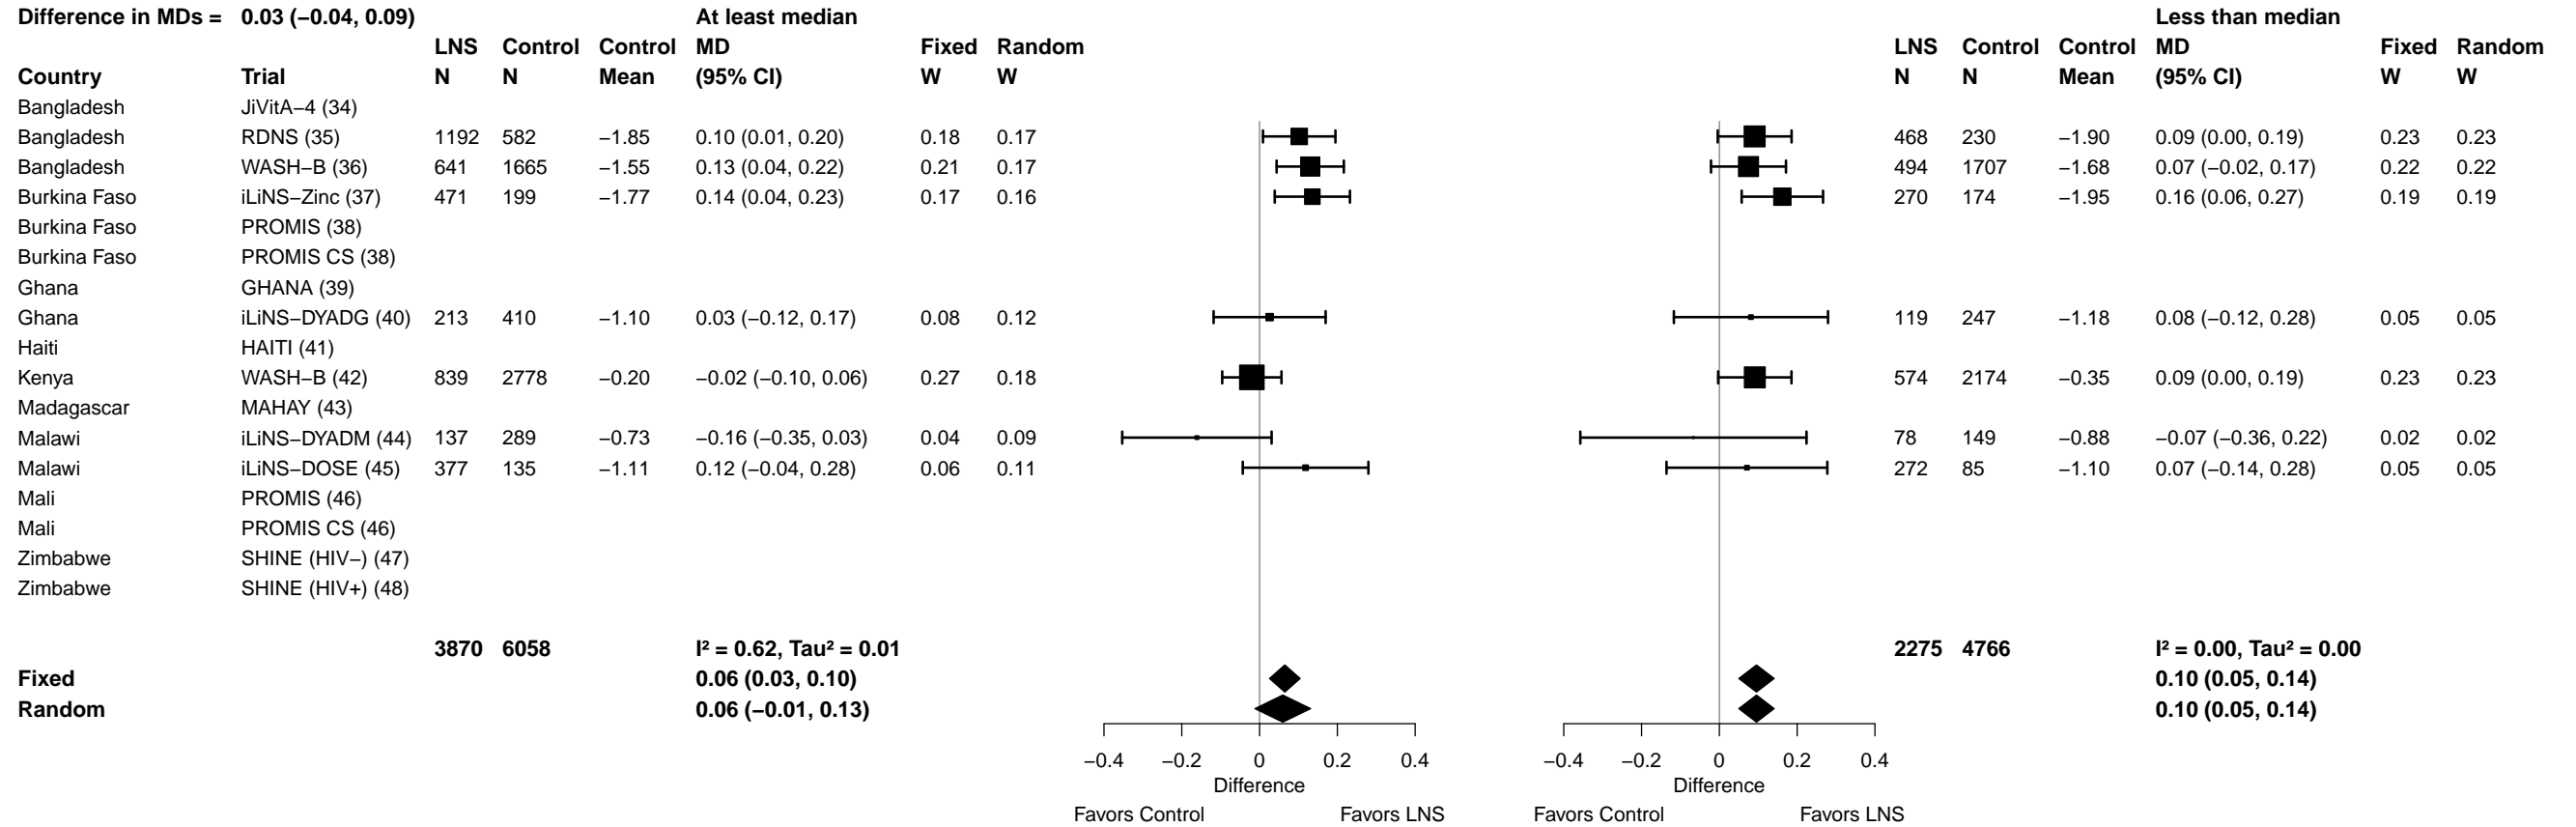

Supplemental figure 7O: Mean difference in HCZ

7O6: Stratified by Season at the time of assessment

P-for-interaction = 0.477

Difference in MDs = -0.02 (-0.06, 0.03)

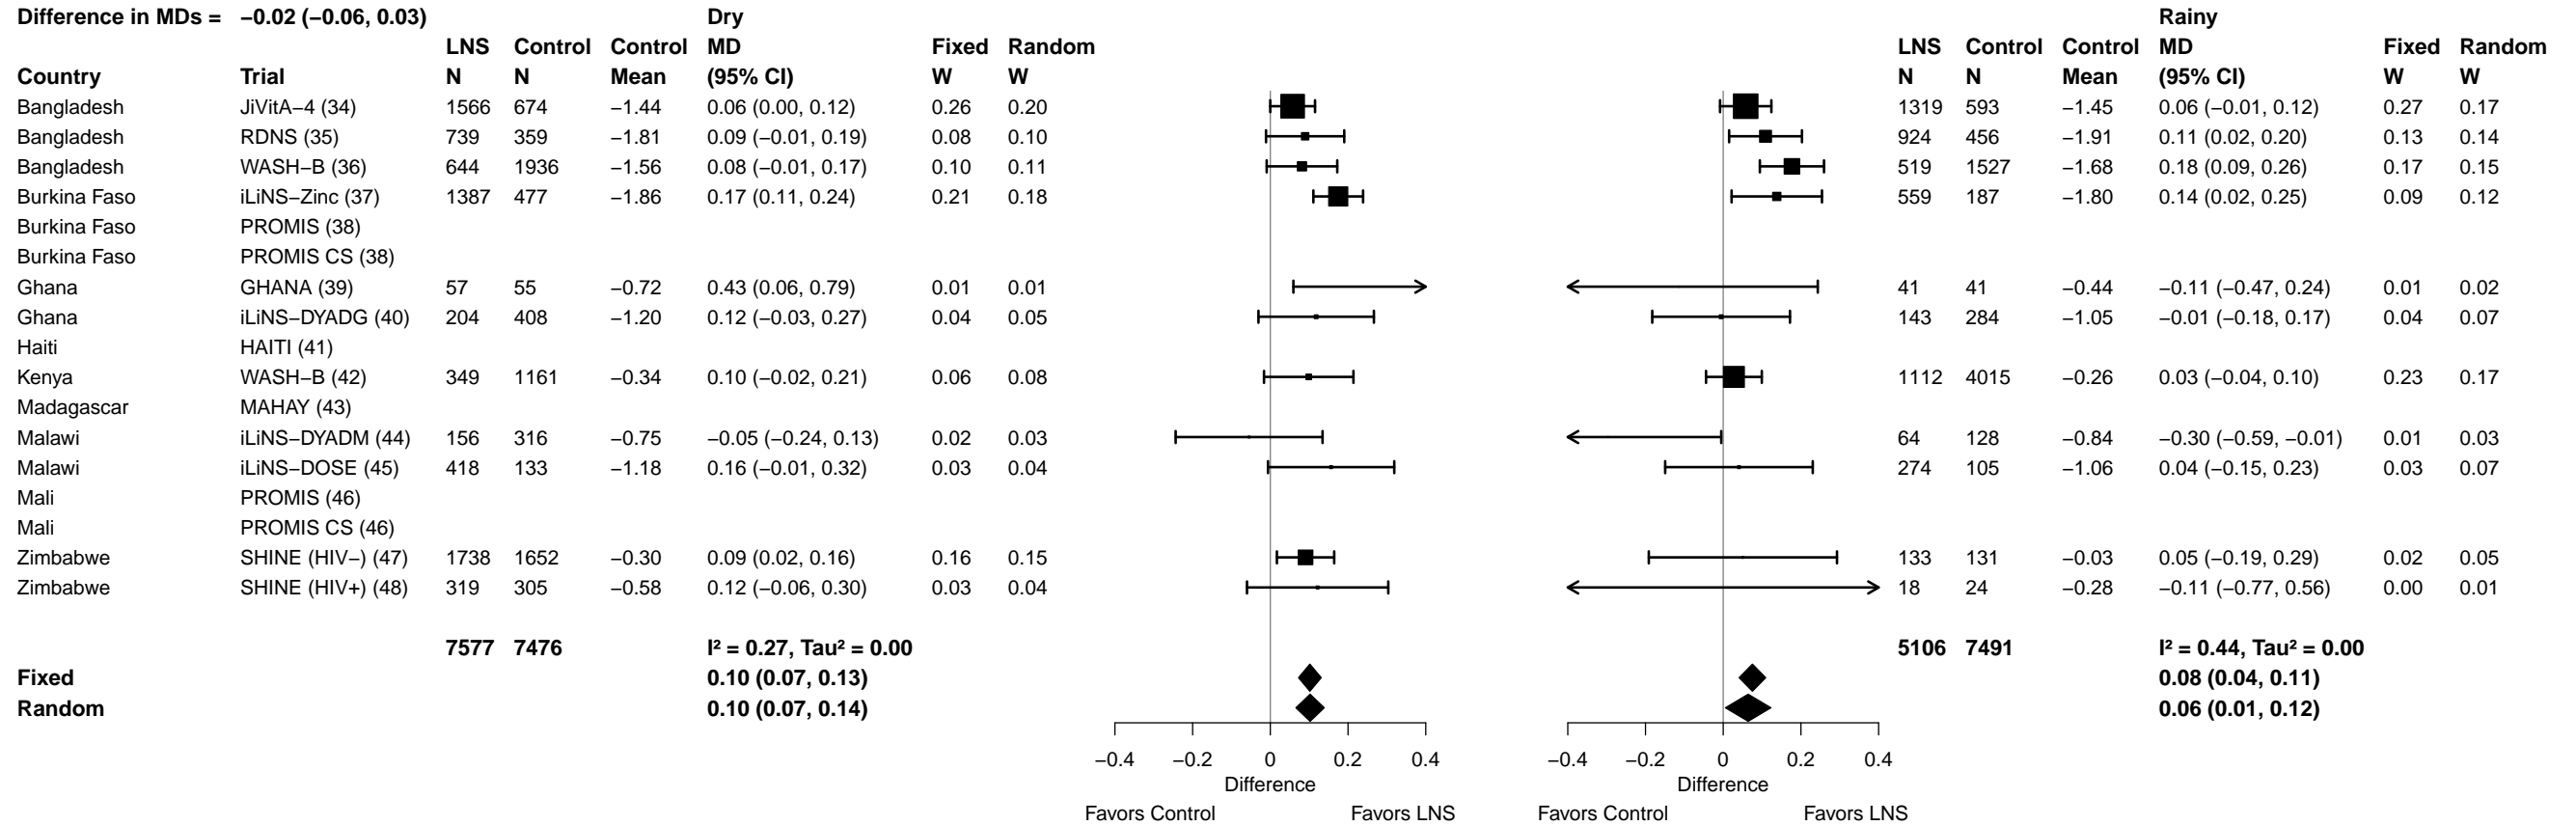



### Supplemental figure 7P: Small head size prevalence ratio

#### 7P1: Stratified by Household socio-economic status

**P-for-interaction = 0.462**  
**Ratio of PRs = 1.04 (0.94, 1.14)**

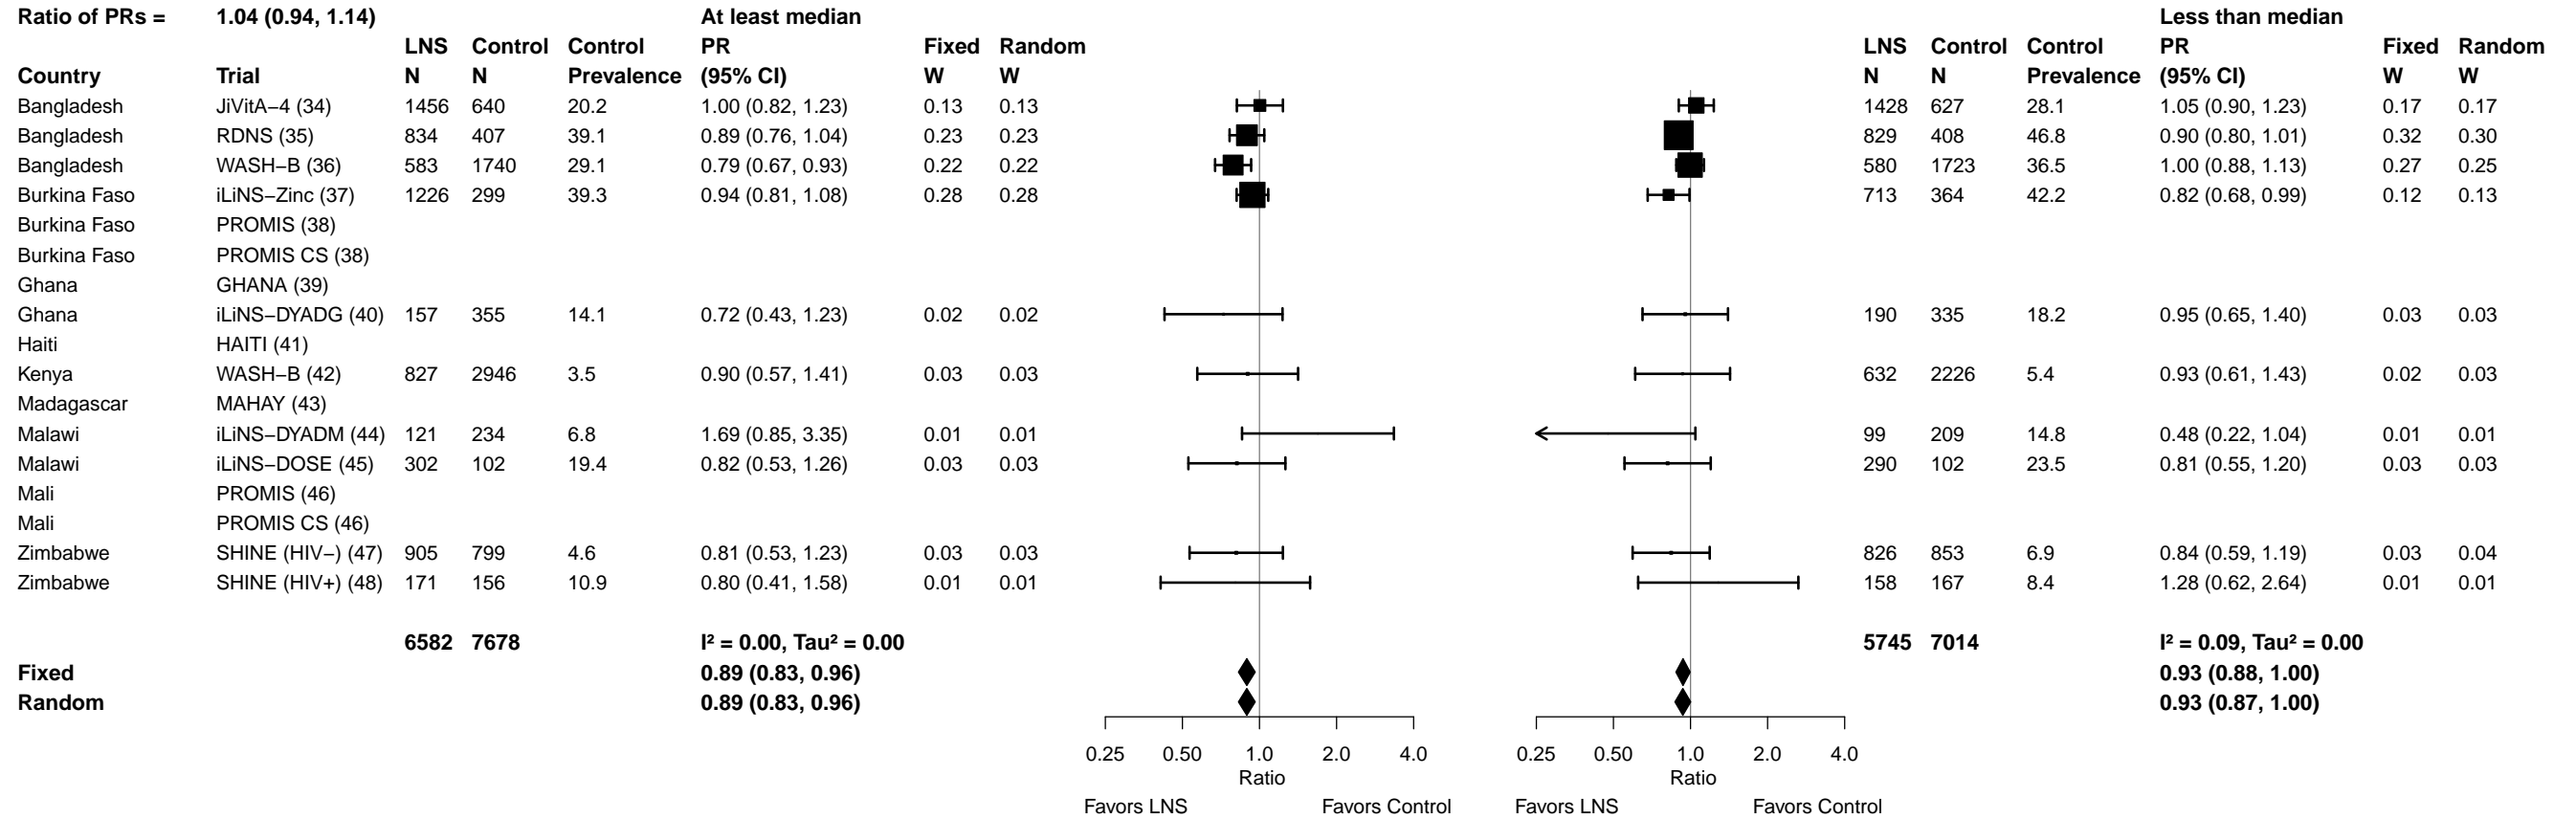



Supplemental figure 7P: Small head size prevalence ratio

7P3: Stratified by Household source water quality

P-for-interaction = 0.505

Ratio of PRs = 0.93 (0.74, 1.16)

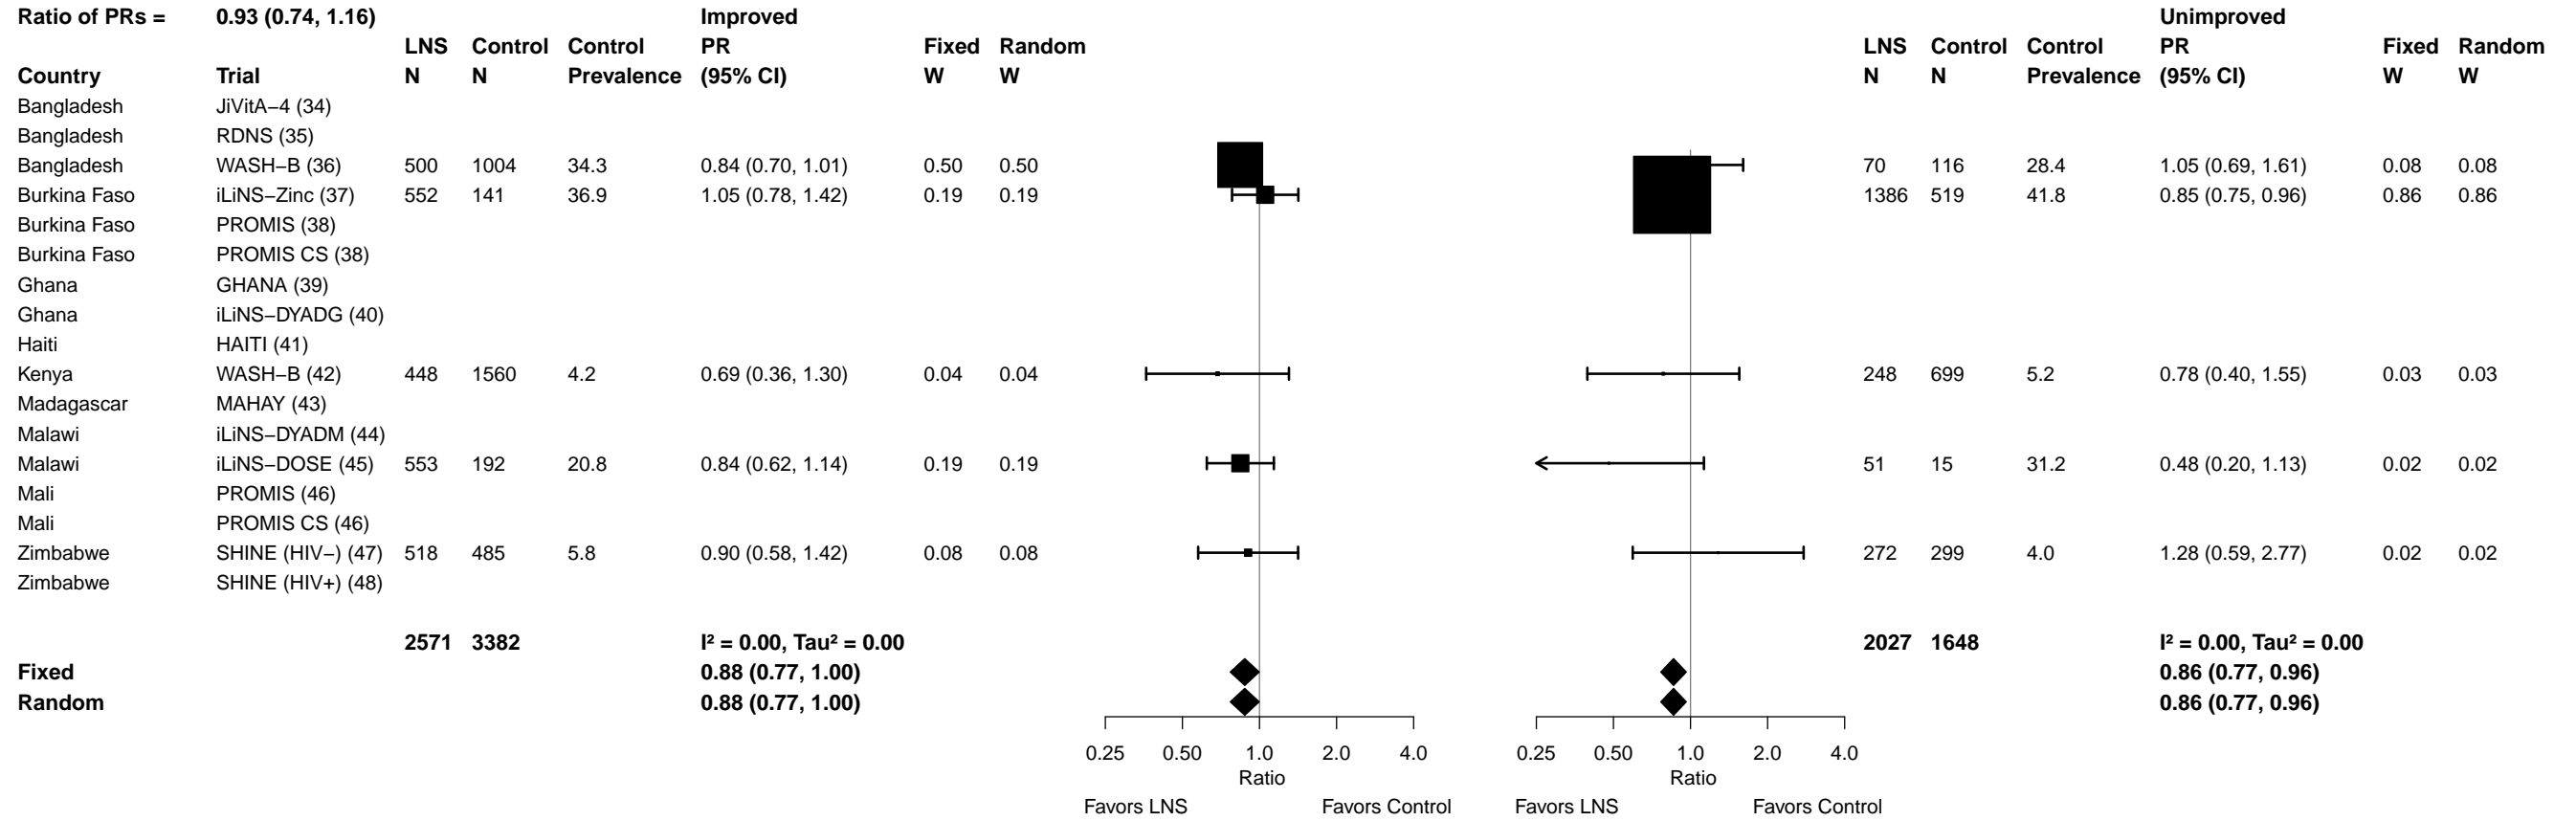

Supplemental figure 7P: Small head size prevalence ratio

7P4: Stratified by Household sanitation

P-for-interaction = 0.109

Ratio of PRs = 1.13 (0.97, 1.31)

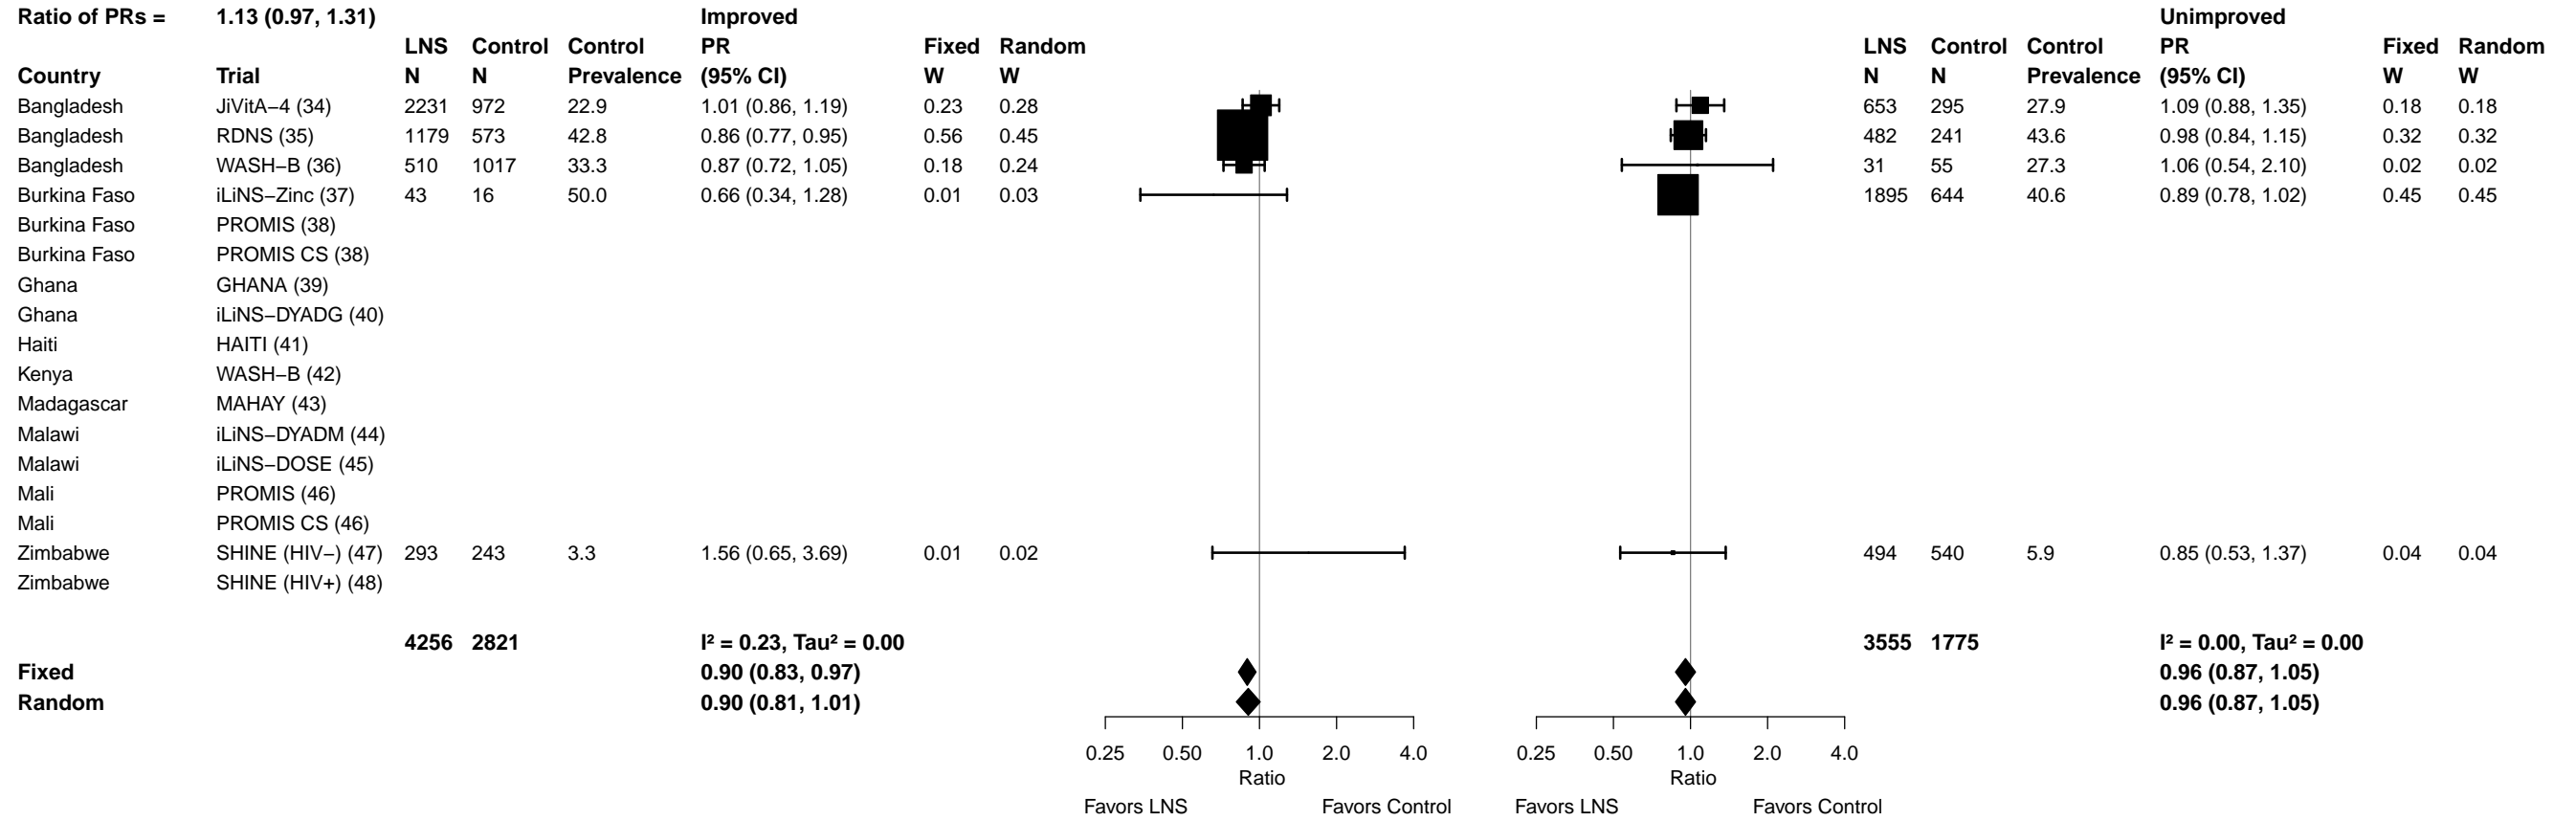

Supplemental figure 7P: Small head size prevalence ratio

7P5: Stratified by Home environment

P-for-interaction = 0.826

Ratio of PRs = 0.99 (0.89, 1.10)

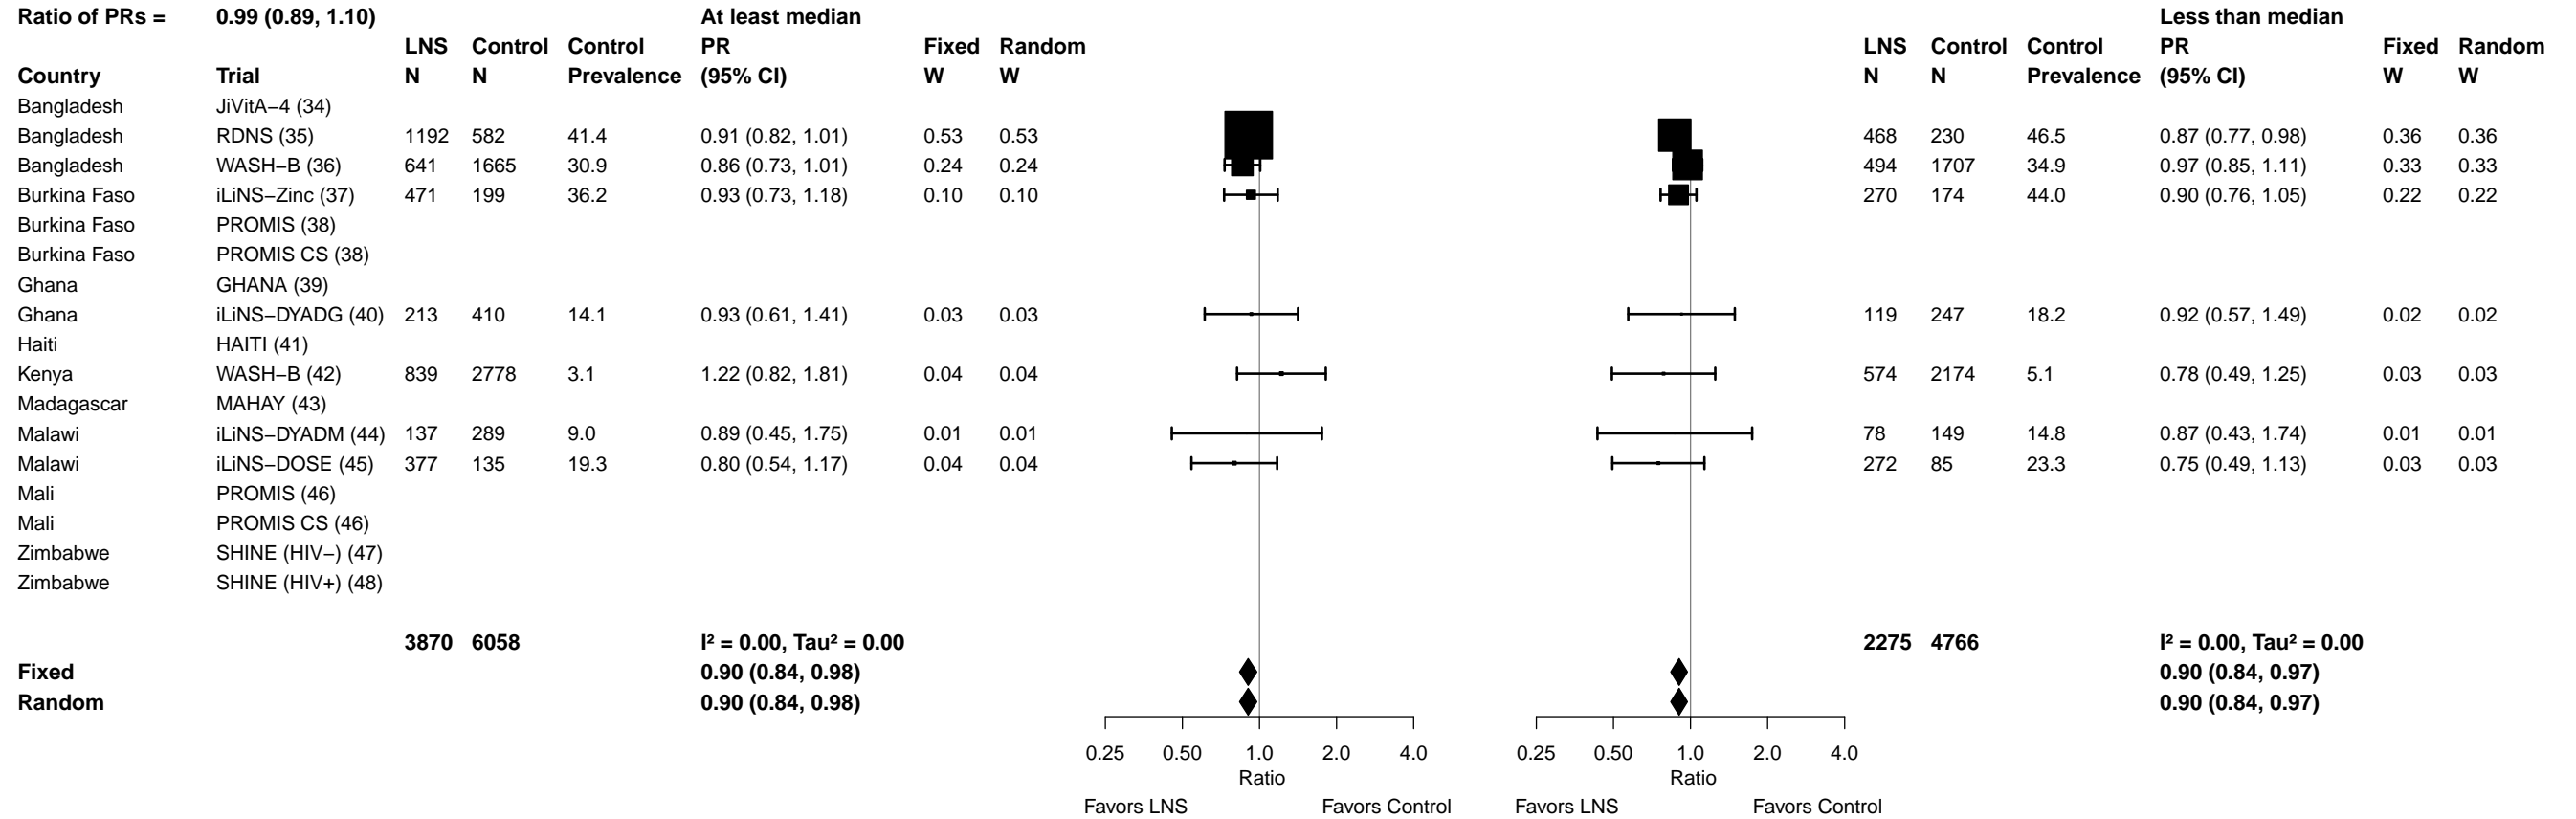

Supplemental figure 7P: Small head size prevalence ratio

7P6: Stratified by Season at the time of assessment

P-for-interaction = 0.434

Ratio of PRs = 1.04 (0.94, 1.15)

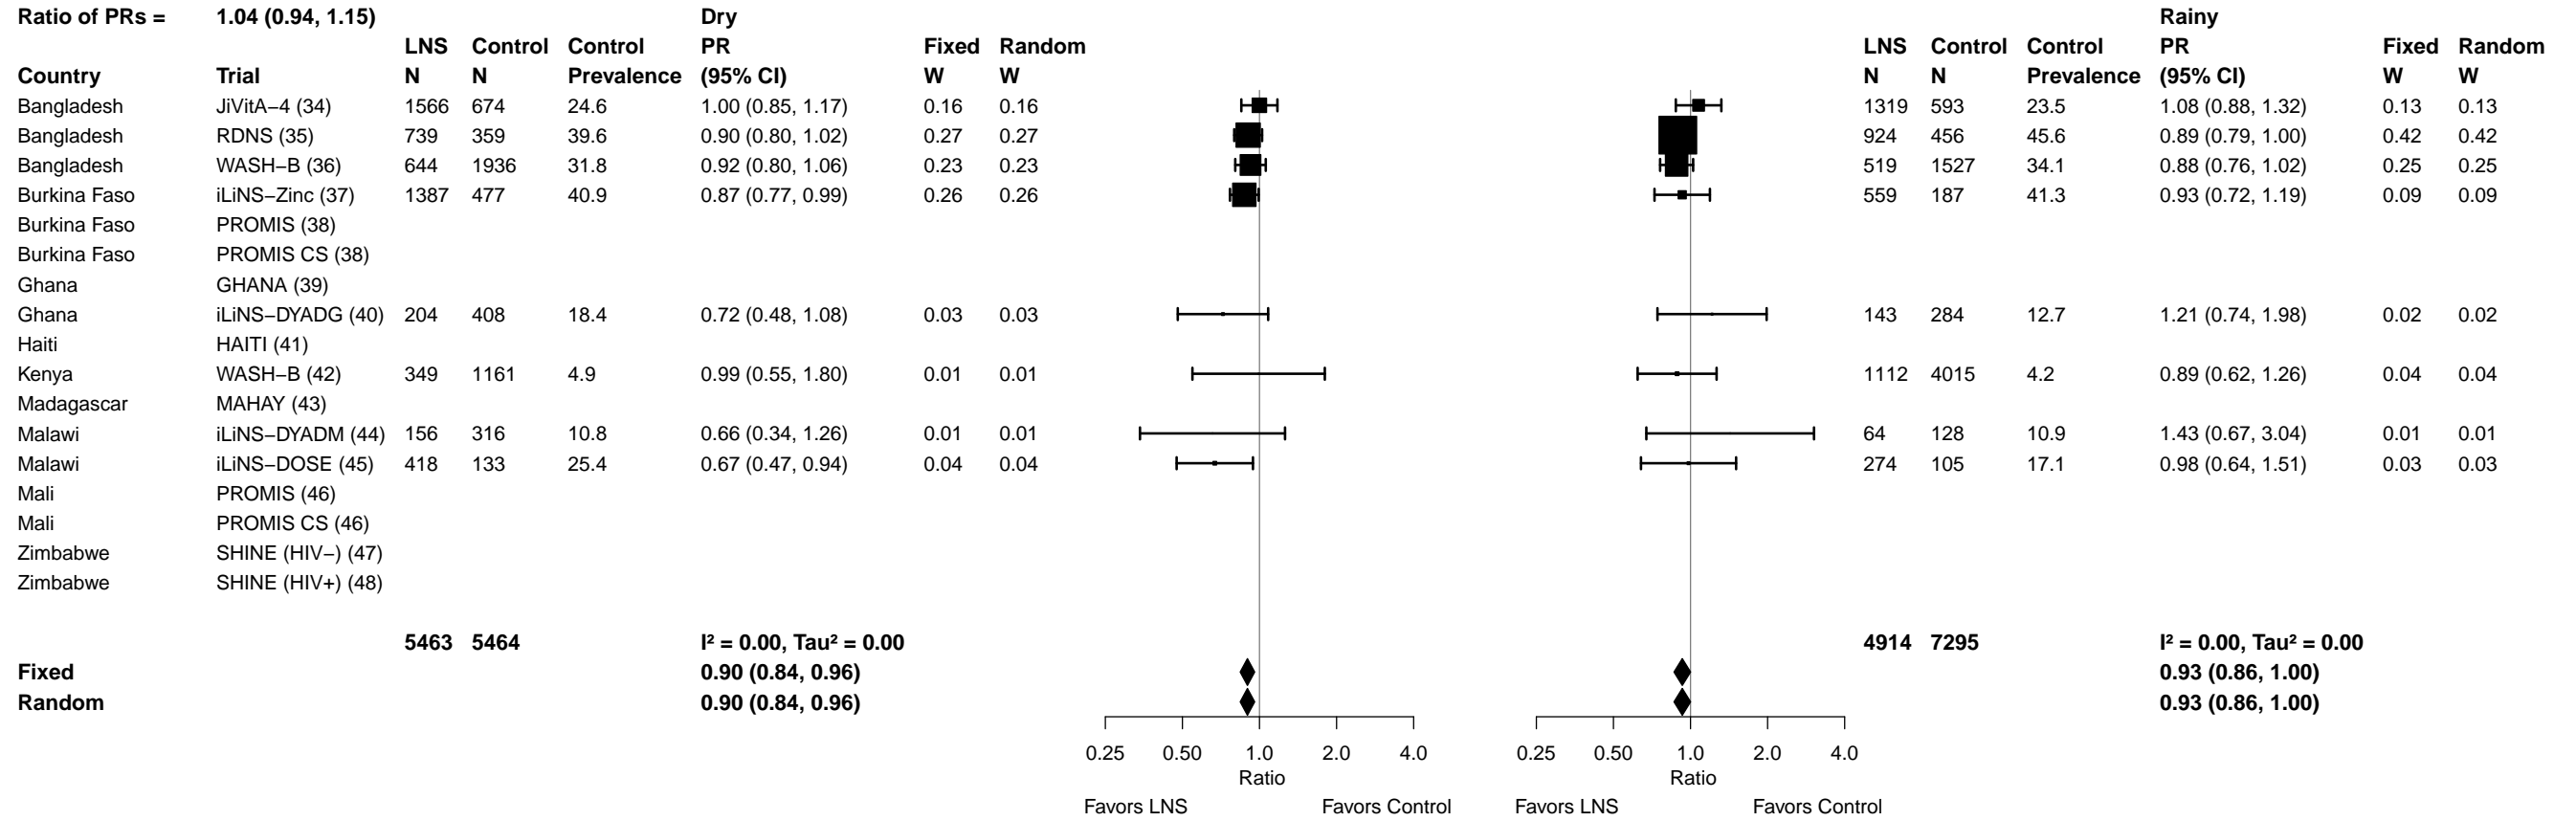

### Supplemental figure 7Q: Small head size prevalence difference

#### 7Q1: Stratified by Household socio-economic status

P-for-interaction = 0.965

Difference in PDs = 0.00 (-0.01, 0.02)

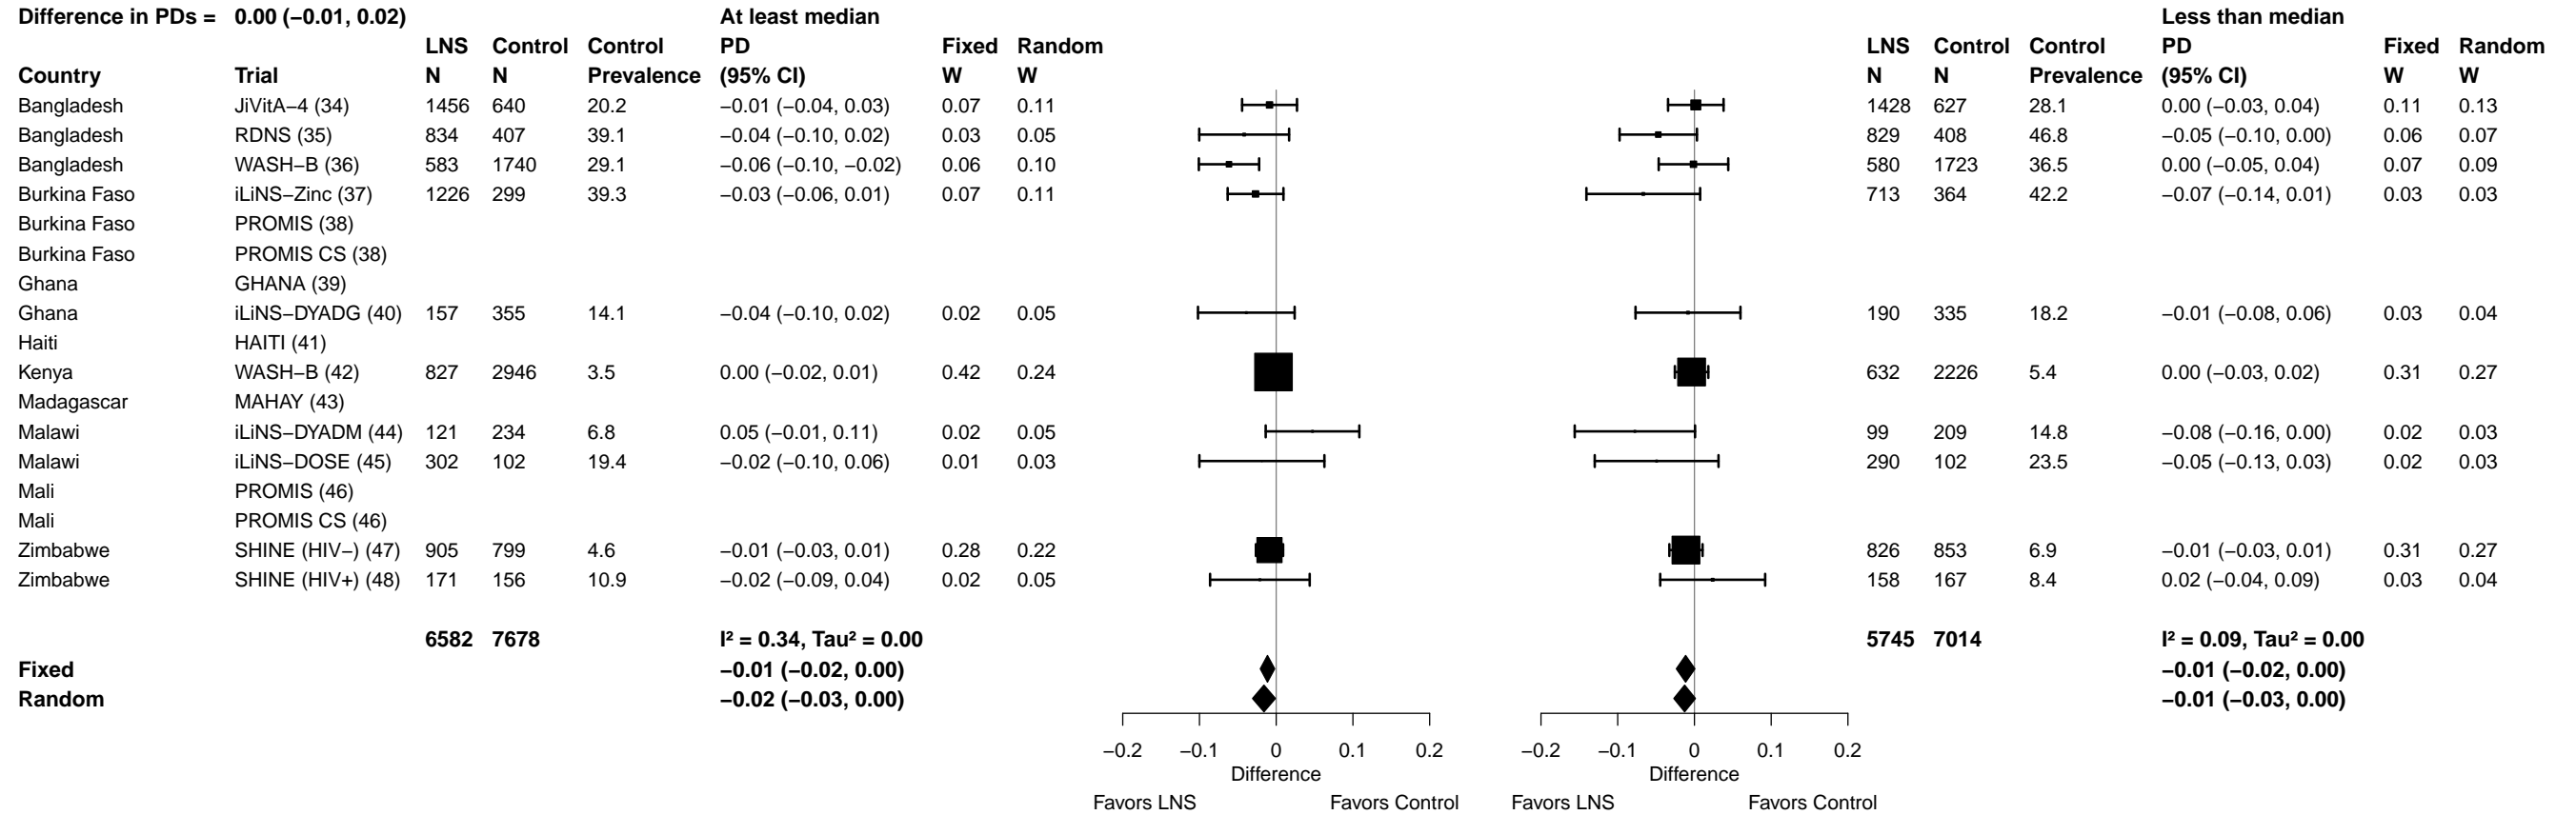

Supplemental figure 7Q: Small head size prevalence difference

7Q2: Stratified by Household food insecurity

P-for-interaction = 0.396

Difference in PDs = 0.01 (-0.01, 0.03)

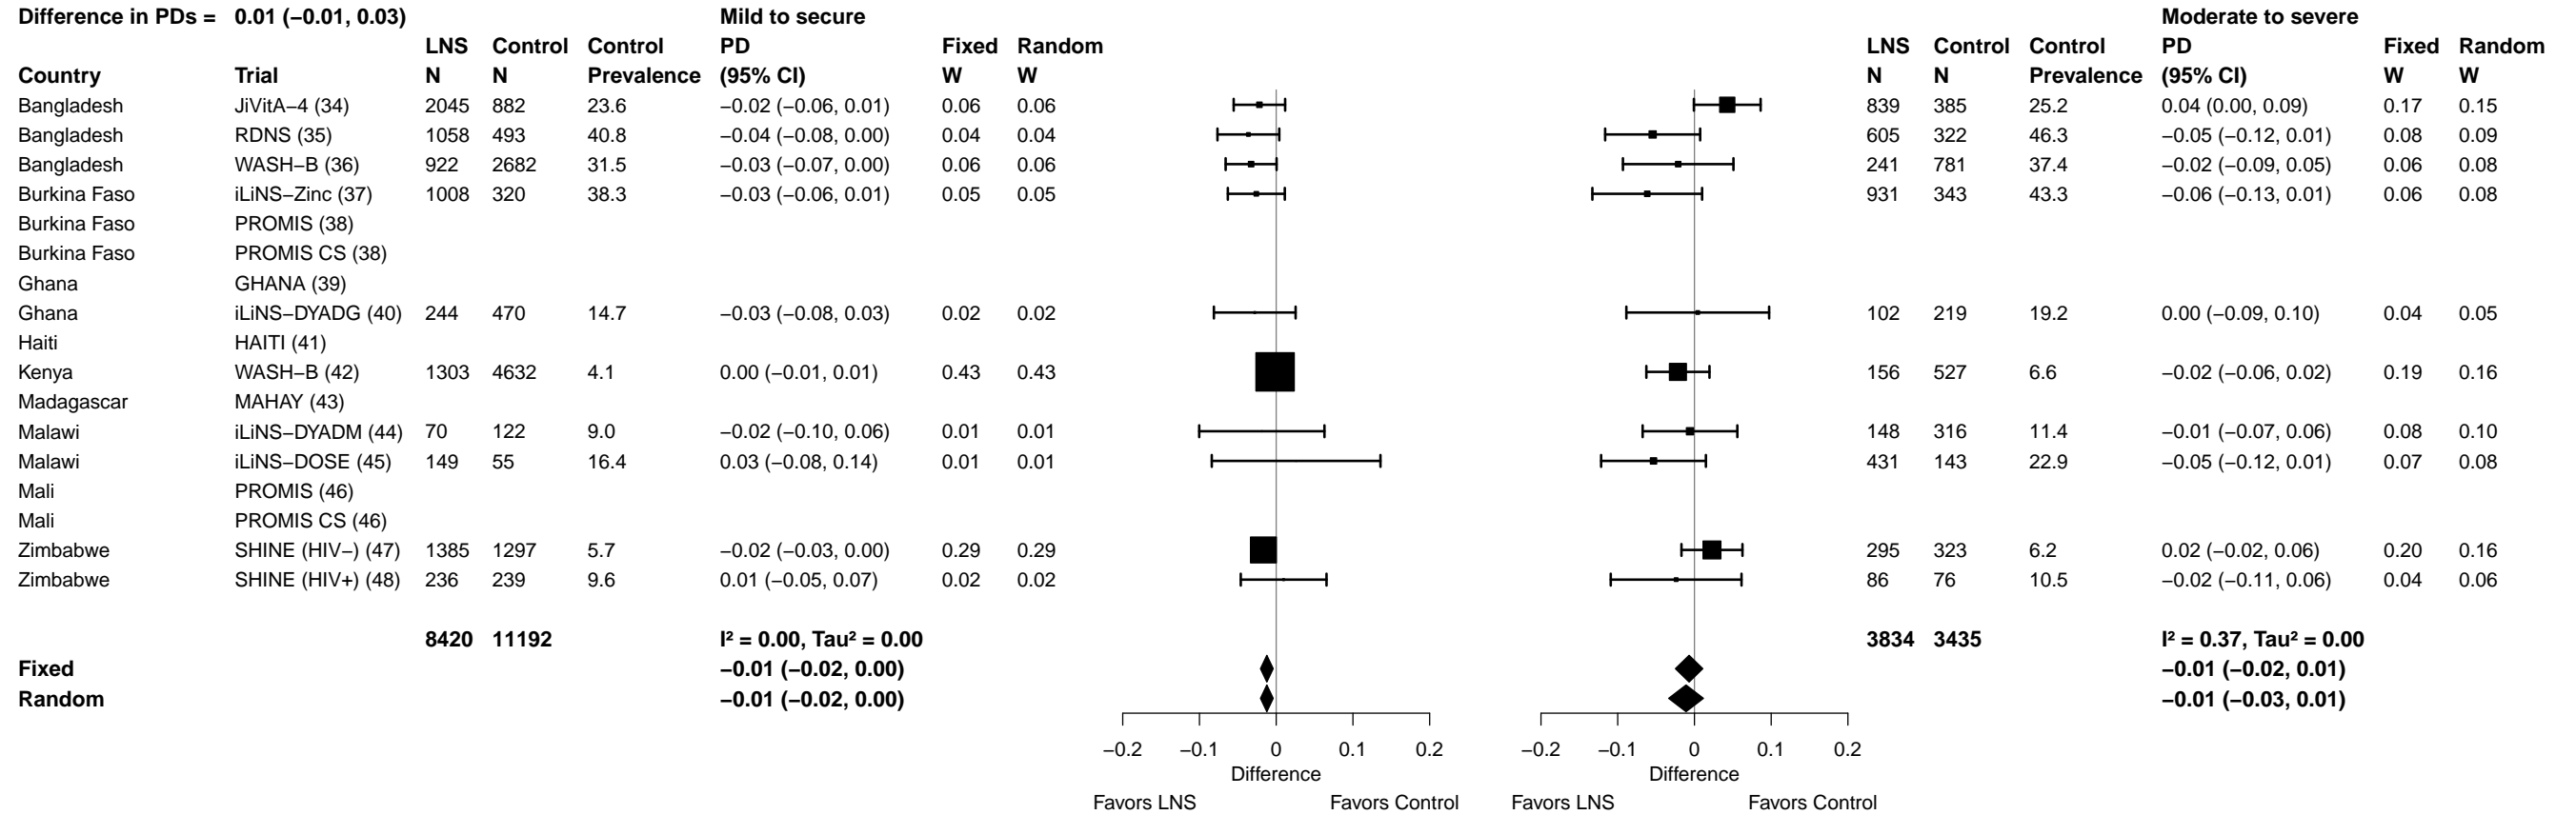



Supplemental figure 7Q: Small head size prevalence difference

7Q3: Stratified by Household source water quality

P-for-interaction = 0.976

Difference in PDs = 0.00 (-0.02, 0.03)

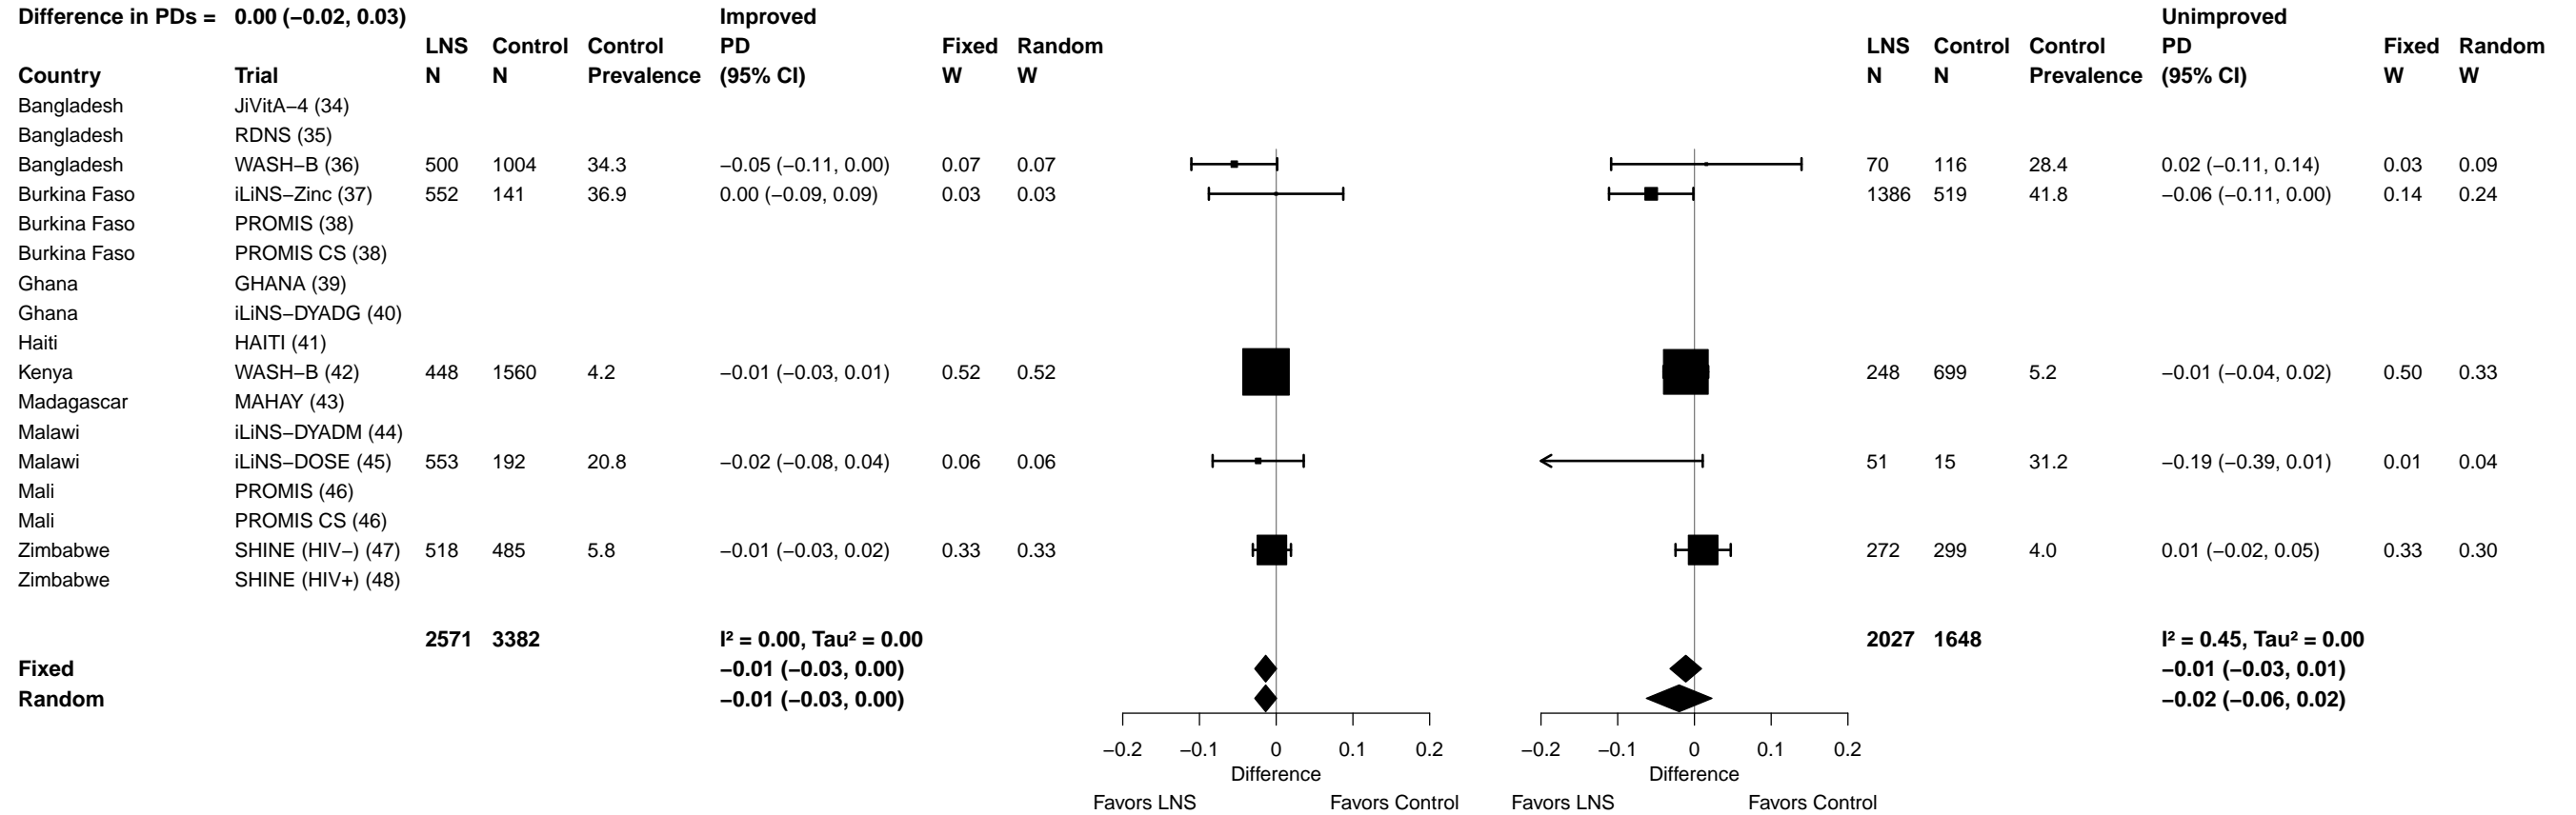

Supplemental figure 7Q: Small head size prevalence difference

7Q4: Stratified by Household sanitation

P-for-interaction = 0.794

Difference in PDs = 0.00 (-0.03, 0.04)

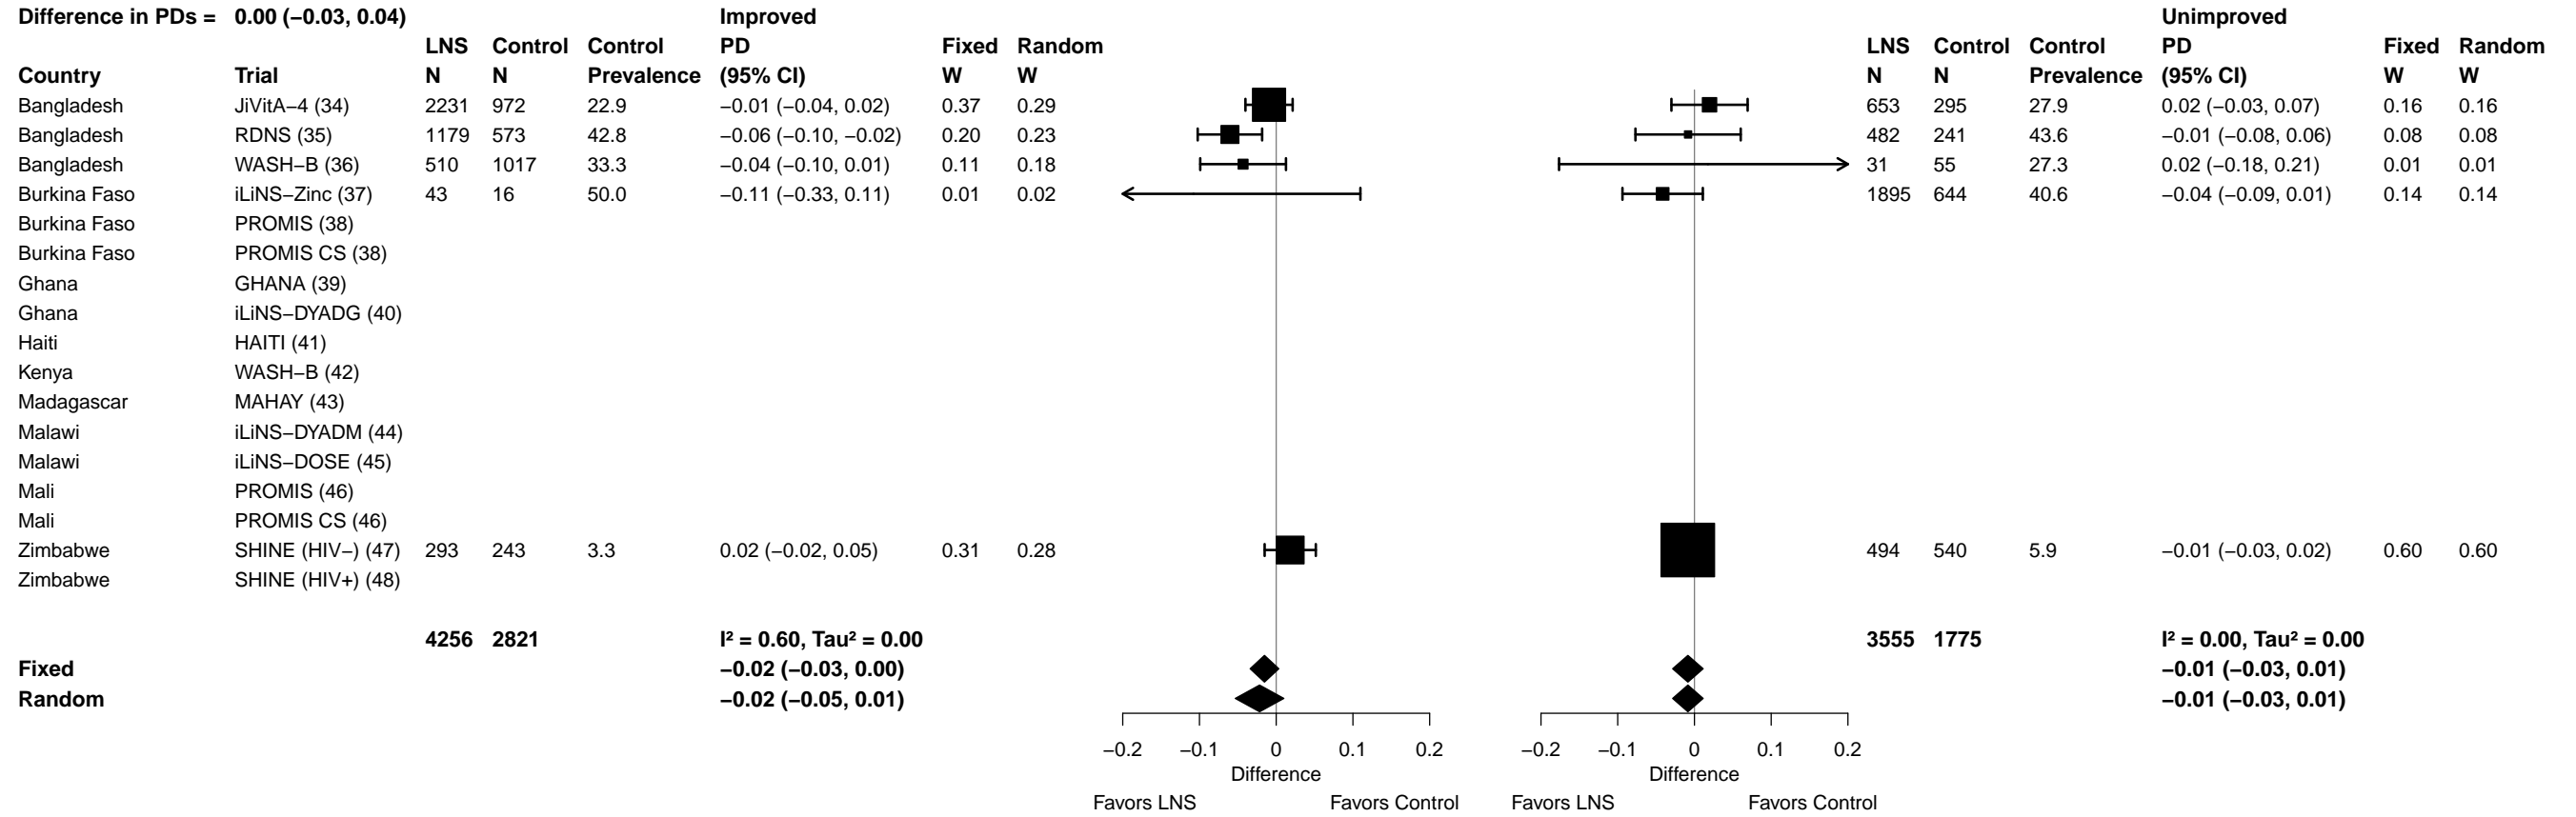

Supplemental figure 7Q: Small head size prevalence difference

7Q5: Stratified by Home environment

P-for-interaction = 0.291

Difference in PDs = -0.01 (-0.03, 0.01)

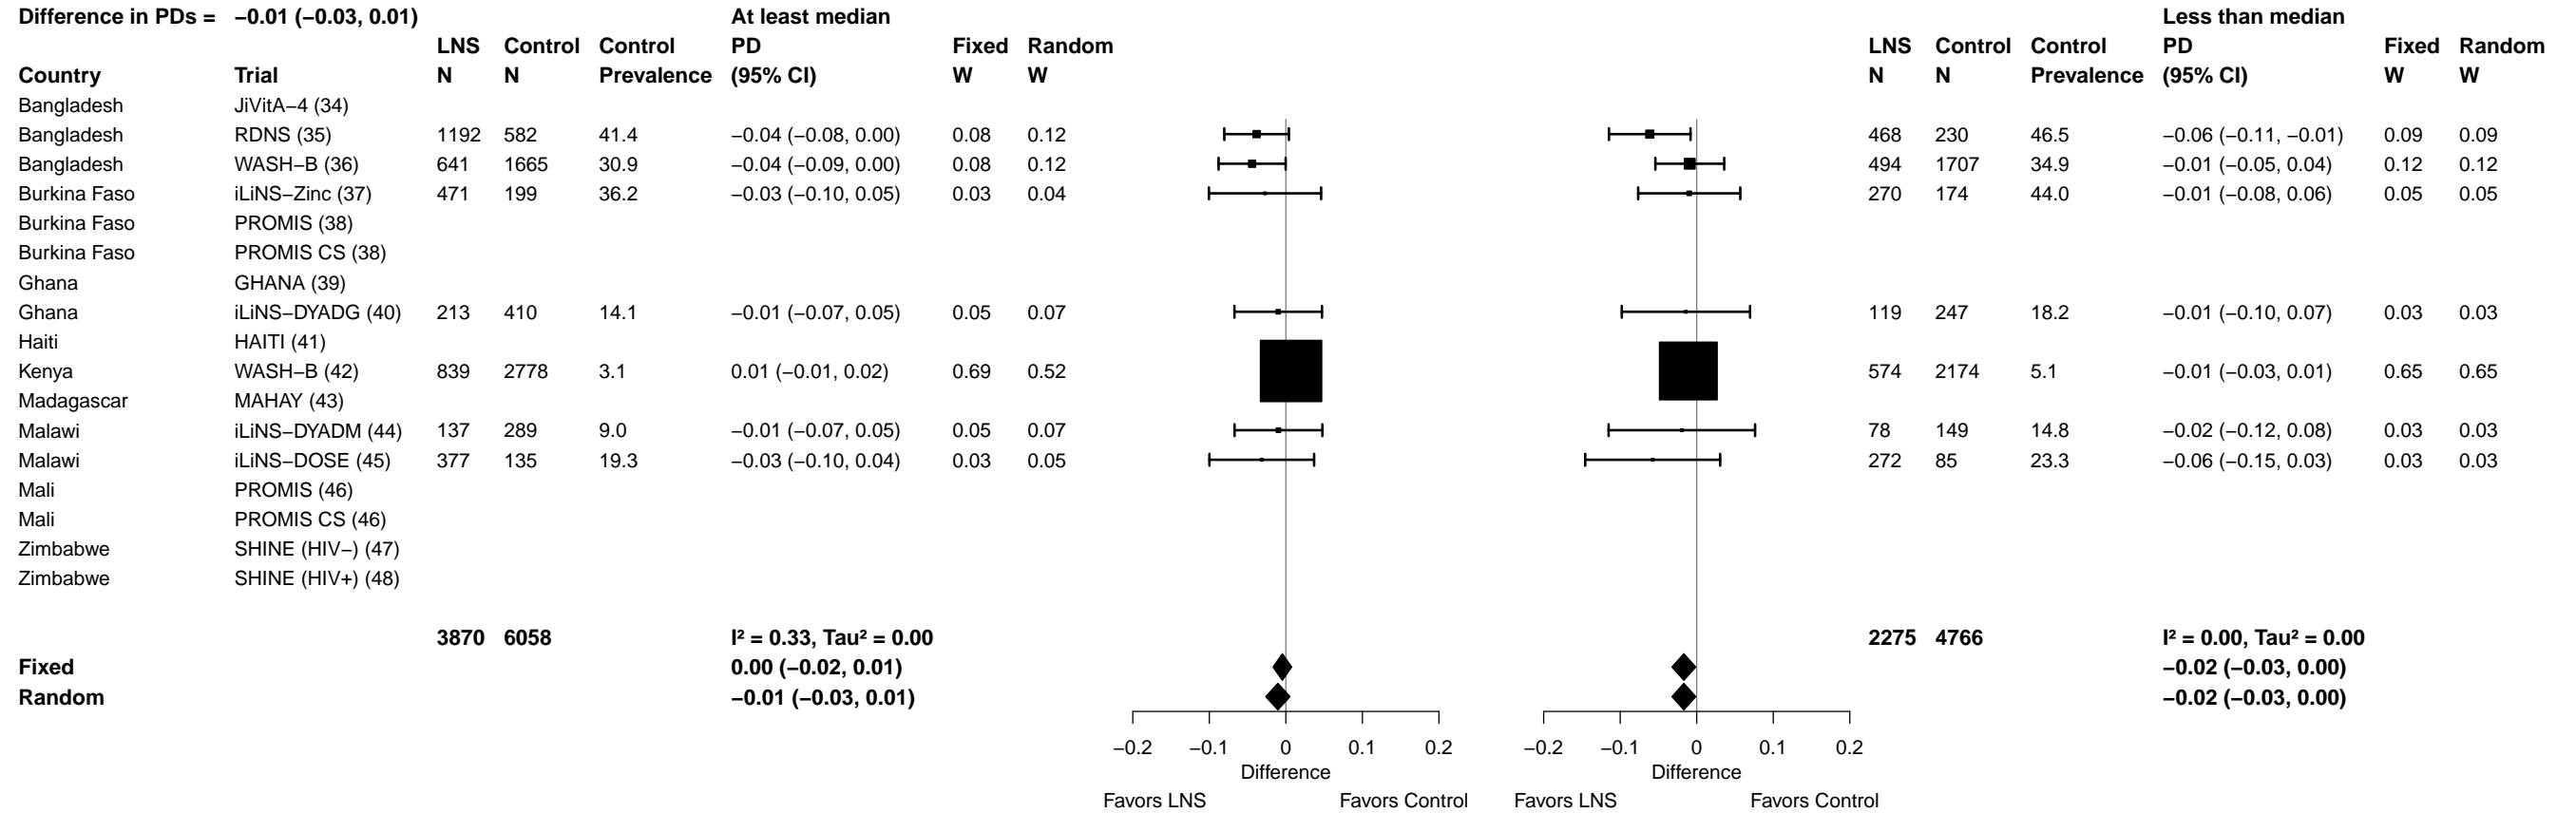

Supplemental figure 7Q: Small head size prevalence difference

7Q6: Stratified by Season at the time of assessment

P-for-interaction = 0.258

Difference in PDs = 0.01 (-0.01, 0.03)

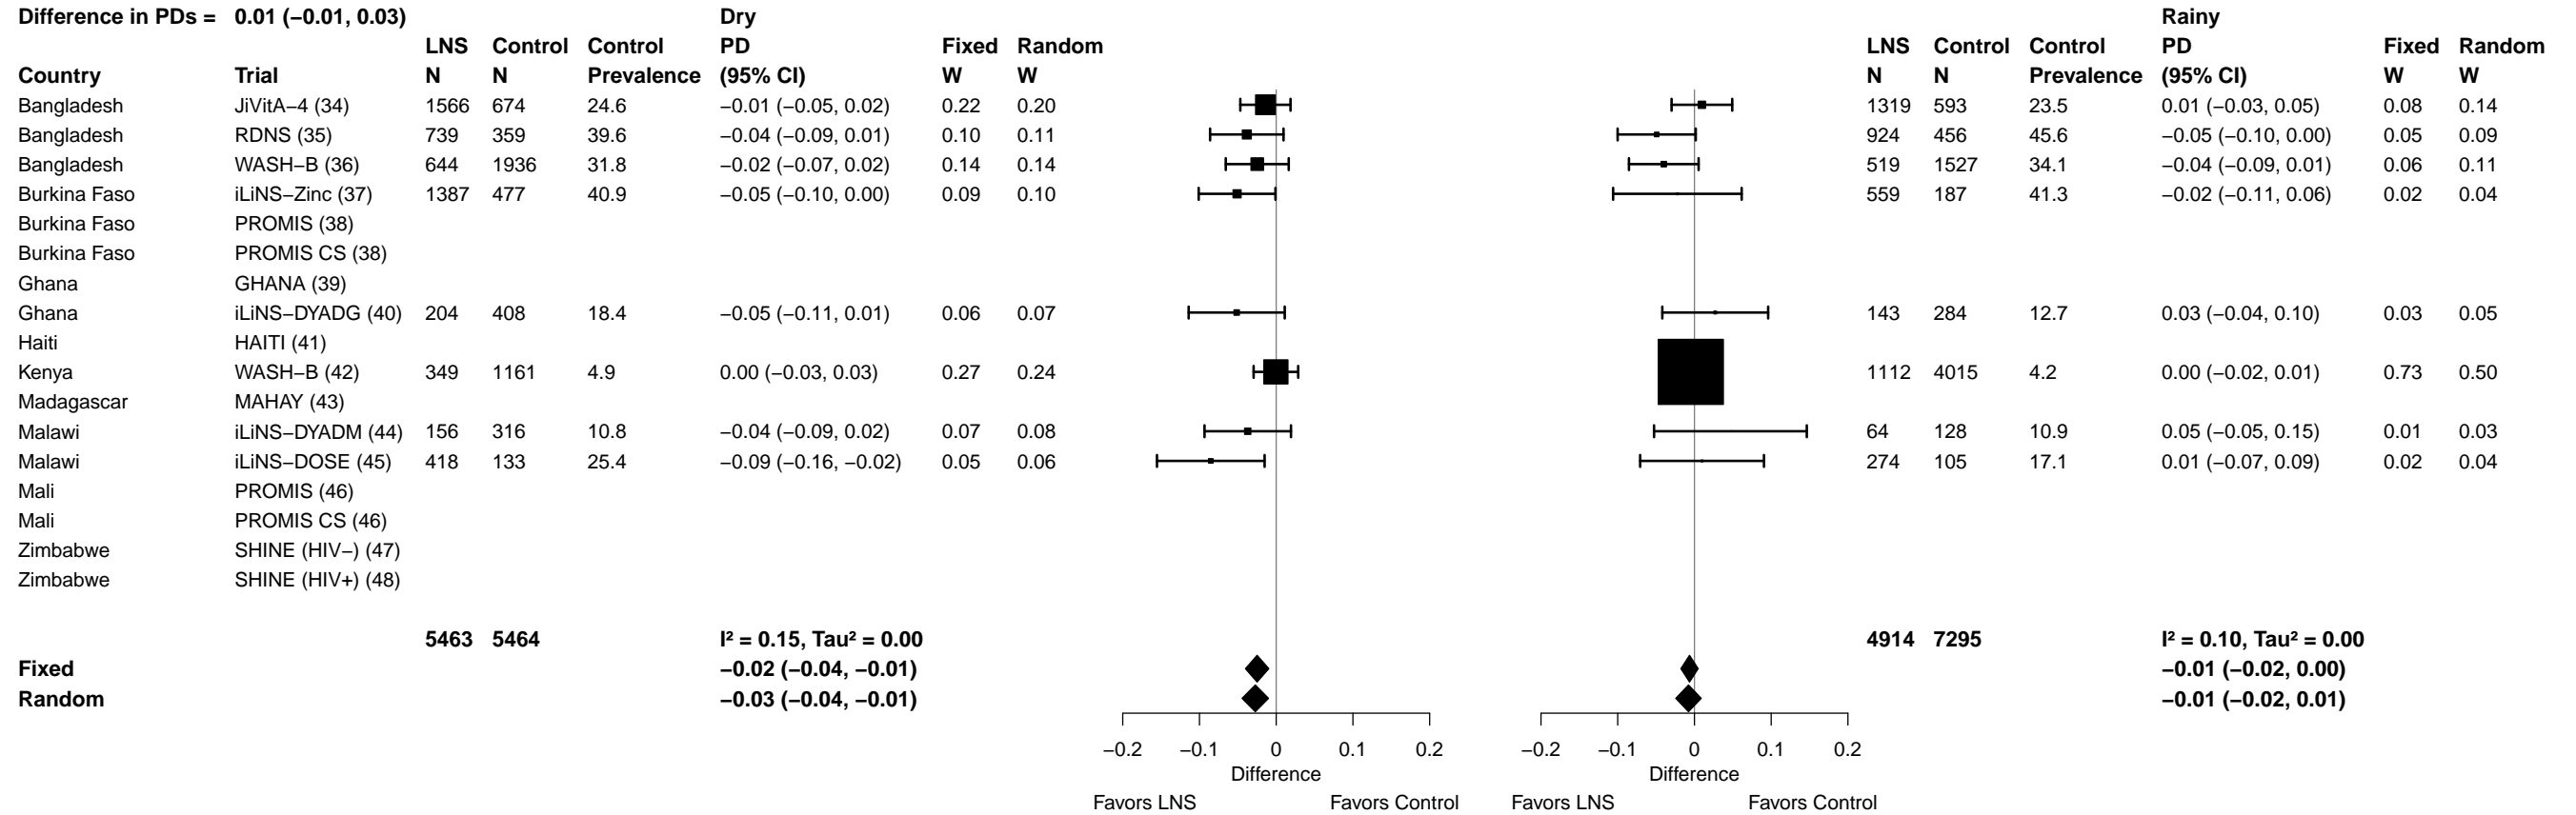

Supplement: Supplementary file [file media-2.pdf]
